# Supplementary material for: Illumina MiSeq Phylogenetic Amplicon Sequencing Shows a Large Reduction of an Uncharacterised Succinivibrionaceae and an Increase of the Methanobrevibacter gottschalkii Clade in Feed Restricted Cattle
Source: PubMed Central journal article supplement (PMC4520551; doi:10.1371/journal.pone.0133234), 2015-07-30
Supplement: pone.0133234.s003.pdf [file pone.0133234.s003.pdf]

|       | Liquid Spearman rho values |       |       |       | Liquid Spearman P values |       |       |       | Solid Spearman rho values |       |       |       | Solid Spearman P values |       |       |       |       |
|-------|----------------------------|-------|-------|-------|--------------------------|-------|-------|-------|---------------------------|-------|-------|-------|-------------------------|-------|-------|-------|-------|
|       | acet                       | prop  | n-but | A:P   | acet                     | prop  | n-but | A:P   | acet                      | prop  | n-but | A:P   | acet                    | prop  | n-but | A:P   |       |
| M1    | 0.11                       | -0.37 | 0.22  | 0.50  | 0.431                    | 0.005 | 0.102 | 9E-05 | M1                        | -0.12 | -0.60 | 0.12  | 0.64                    | 0.386 | 1E-06 | 0.396 | 1E-07 |
| M2    | -0.01                      | -0.02 | -0.09 | -0.08 | 0.914                    | 0.866 | 0.523 | 0.578 | M2                        | -0.11 | 0.22  | -0.03 | -0.29                   | 0.432 | 0.104 | 0.814 | 0.033 |
| M3    | -0.06                      | -0.30 | 0.05  | 0.23  | 0.678                    | 0.026 | 0.714 | 0.086 | M3                        | -0.06 | -0.24 | 0.02  | 0.19                    | 0.638 | 0.079 | 0.864 | 0.162 |
| M4    | -0.16                      | 0.03  | -0.16 | -0.20 | 0.244                    | 0.828 | 0.242 | 0.139 | M4                        | -0.17 | -0.01 | -0.26 | -0.18                   | 0.207 | 0.97  | 0.051 | 0.182 |
| M5    | 0.21                       | 0.06  | 0.14  | 0.12  | 0.118                    | 0.654 | 0.322 | 0.38  | M5                        | 0.17  | 0.01  | 0.43  | 0.15                    | 0.225 | 0.938 | 0.001 | 0.273 |
| M6    | 0.08                       | -0.07 | 0.24  | 0.17  | 0.561                    | 0.635 | 0.072 | 0.213 | M6                        | -0.05 | -0.36 | 0.04  | 0.45                    | 0.711 | 0.007 | 0.749 | 7E-04 |
| M7    | 0.26                       | -0.37 | 0.50  | 0.74  | 0.06                     | 0.005 | 9E-05 | 0     | M7                        | 0.25  | -0.29 | 0.48  | 0.69                    | 0.07  | 0.029 | 2E-04 | 0     |
| M8    | 0.09                       | -0.12 | 0.17  | 0.21  | 0.527                    | 0.378 | 0.207 | 0.128 | M8                        | 0.14  | -0.03 | 0.32  | 0.24                    | 0.299 | 0.805 | 0.017 | 0.072 |
| M9    | -0.04                      | -0.44 | 0.18  | 0.47  | 0.793                    | 7E-04 | 0.196 | 3E-04 | M9                        | 0.33  | 0.13  | 0.35  | 0.13                    | 0.014 | 0.36  | 0.01  | 0.34  |
| M10   | -0.05                      | -0.32 | -0.16 | 0.34  | 0.71                     | 0.018 | 0.249 | 0.011 | M10                       | -0.02 | 0.34  | -0.05 | -0.31                   | 0.874 | 0.012 | 0.744 | 0.021 |
| M11   | 0.18                       | 0.09  | 0.11  | -0.01 | 0.2                      | 0.498 | 0.439 | 0.923 | M11                       | -0.08 | -0.17 | 0.17  | 0.12                    | 0.584 | 0.213 | 0.21  | 0.364 |
| M12   | -0.02                      | -0.06 | 0.05  | 0.02  | 0.881                    | 0.687 | 0.721 | 0.903 | M12                       | 0.13  | -0.19 | 0.26  | 0.35                    | 0.326 | 0.164 | 0.051 | 0.01  |
| M13   | -0.19                      | 0.10  | -0.36 | -0.32 | 0.167                    | 0.446 | 0.007 | 0.017 | M13                       | 0.24  | 0.21  | 0.37  | -0.04                   | 0.083 | 0.119 | 0.006 | 0.795 |
| M14   | 0.24                       | 0.23  | 0.14  | -0.08 | 0.074                    | 0.094 | 0.298 | 0.567 | M14                       | 0.15  | 0.21  | 0.05  | -0.14                   | 0.271 | 0.121 | 0.7   | 0.297 |
| M15   | 0.21                       | 0.14  | 0.20  | -0.04 | 0.118                    | 0.32  | 0.142 | 0.797 | M15                       | 0.06  | 0.33  | 0.09  | -0.33                   | 0.687 | 0.013 | 0.5   | 0.015 |
| M16   | 0.12                       | -0.05 | 0.21  | 0.20  | 0.386                    | 0.714 | 0.122 | 0.142 | M16                       | 0.16  | 0.12  | 0.21  | 0.04                    | 0.238 | 0.368 | 0.119 | 0.782 |
| M17   | -0.11                      | -0.59 | 0.14  | 0.59  | 0.44                     | 2E-06 | 0.316 | 2E-06 | M17                       | 0.00  | -0.59 | 0.19  | 0.69                    | 0.997 | 3E-06 | 0.16  | 1E-08 |
| M18   | -0.31                      | -0.10 | -0.41 | -0.16 | 0.022                    | 0.472 | 0.002 | 0.25  | M18                       | 0.03  | 0.10  | -0.10 | -0.15                   | 0.845 | 0.464 | 0.49  | 0.274 |
| M19   | -0.27                      | 0.14  | -0.43 | -0.46 | 0.045                    | 0.294 | 9E-04 | 5E-04 | M19                       | -0.23 | -0.04 | -0.22 | -0.21                   | 0.091 | 0.775 | 0.113 | 0.127 |
| M20   | -0.06                      | 0.14  | 0.12  | -0.16 | 0.689                    | 0.291 | 0.363 | 0.23  | M20                       | 0.22  | 0.03  | 0.41  | 0.20                    | 0.104 | 0.841 | 0.002 | 0.145 |
| T21   | 0.24                       | 0.37  | 0.19  | -0.27 | 0.083                    | 0.005 | 0.16  | 0.05  | T21                       | 0.17  | 0.00  | 0.28  | 0.14                    | 0.208 | 0.984 | 0.037 | 0.312 |
| T22   | 0.00                       | 0.04  | 0.04  | 0.04  | 0.996                    | 0.774 | 0.754 | 0.758 | T22                       | -0.07 | -0.30 | 0.18  | 0.34                    | 0.601 | 0.024 | 0.193 | 0.012 |
| T23   | -0.01                      | -0.26 | 0.02  | 0.31  | 0.927                    | 0.053 | 0.877 | 0.021 | T23                       | -0.03 | -0.29 | 0.04  | 0.35                    | 0.809 | 0.029 | 0.789 | 0.01  |
| T24   | -0.33                      | -0.10 | -0.21 | -0.08 | 0.015                    | 0.455 | 0.129 | 0.545 | T24                       | -0.41 | -0.16 | -0.19 | -0.10                   | 0.002 | 0.231 | 0.159 | 0.475 |
| T25   | -0.32                      | 0.04  | -0.37 | -0.27 | 0.016                    | 0.766 | 0.006 | 0.042 | T25                       | -0.19 | -0.01 | -0.17 | -0.26                   | 0.17  | 0.924 | 0.215 | 0.058 |
| T26   | -0.30                      | 0.21  | -0.51 | -0.51 | 0.025                    | 0.133 | 6E-05 | 6E-05 | T26                       | -0.19 | 0.43  | -0.43 | -0.59                   | 0.163 | 0.001 | 1E-03 | 2E-06 |
| T27   | 0.38                       | -0.01 | 0.44  | 0.28  | 0.004                    | 0.94  | 9E-04 | 0.035 | T27                       | 0.07  | -0.29 | 0.17  | 0.43                    | 0.621 | 0.034 | 0.215 | 0.001 |
| S3000 | 0.34                       | -0.09 | 0.46  | 0.39  | 0.012                    | 0.52  | 4E-04 | 0.004 | S3000                     | 0.19  | -0.24 | 0.37  | 0.45                    | 0.175 | 0.073 | 0.005 | 6E-04 |
| S3001 | 0.02                       | -0.08 | 0.24  | 0.04  | 0.908                    | 0.575 | 0.079 | 0.792 | S3001                     | 0.30  | 0.02  | 0.43  | 0.29                    | 0.028 | 0.884 | 1E-03 | 0.033 |
| S3002 | -0.04                      | 0.42  | -0.13 | -0.59 | 0.764                    | 0.001 | 0.326 | 2E-06 | S3002                     | -0.07 | 0.32  | -0.10 | -0.45                   | 0.614 | 0.019 | 0.451 | 5E-04 |
| S3003 | 0.04                       | -0.55 | 0.30  | 0.66  | 0.787                    | 1E-05 | 0.026 | 5E-08 | S3003                     | 0.04  | -0.60 | 0.23  | 0.73                    | 0.784 | 1E-06 | 0.096 | 0     |
| S3004 | -0.19                      | 0.41  | -0.29 | -0.69 | 0.175                    | 0.002 | 0.034 | 0     | S3004                     | -0.13 | 0.06  | -0.14 | -0.24                   | 0.326 | 0.645 | 0.295 | 0.076 |
| S3005 | 0.32                       | -0.16 | 0.39  | 0.42  | 0.018                    | 0.251 | 0.003 | 0.002 | S3005                     | 0.29  | -0.13 | 0.50  | 0.42                    | 0.034 | 0.349 | 9E-05 | 0.001 |
| S3006 | 0.32                       | -0.22 | 0.54  | 0.54  | 0.019                    | 0.102 | 2E-05 | 2E-05 | S3006                     | 0.38  | -0.16 | 0.56  | 0.46                    | 0.004 | 0.245 | 1E-05 | 5E-04 |
| S3007 | -0.08                      | 0.32  | -0.25 | -0.45 | 0.581                    | 0.016 | 0.068 | 6E-04 | S3007                     | -0.26 | 0.25  | -0.34 | -0.49                   | 0.054 | 0.07  | 0.012 | 2E-04 |
| S3008 | 0.25                       | -0.29 | 0.44  | 0.52  | 0.065                    | 0.031 | 8E-04 | 5E-05 | S3008                     | 0.29  | -0.28 | 0.45  | 0.52                    | 0.034 | 0.035 | 6E-04 | 5E-05 |
| S3009 | 0.31                       | -0.19 | 0.51  | 0.50  | 0.022                    | 0.164 | 8E-05 | 1E-04 | S3009                     | 0.24  | -0.30 | 0.40  | 0.50                    | 0.073 | 0.028 | 0.002 | 1E-04 |
| S3010 | 0.07                       | -0.43 | 0.22  | 0.50  | 0.591                    | 9E-04 | 0.11  | 1E-04 | S3010                     | 0.18  | -0.41 | 0.42  | 0.61                    | 0.185 | 0.002 | 0.001 | 7E-07 |
| S3011 | -0.01                      | -0.45 | 0.12  | 0.55  | 0.961                    | 6E-04 | 0.366 | 1E-05 | S3011                     | 0.21  | -0.14 | 0.35  | 0.37                    | 0.126 | 0.316 | 0.009 | 0.005 |
| S3012 | 0.07                       | 0.39  | 0.01  | -0.47 | 0.63                     | 0.004 | 0.967 | 3E-04 | S3012                     | -0.14 | 0.28  | -0.23 | -0.49                   | 0.302 | 0.035 | 0.089 | 2E-04 |
| S3013 | 0.03                       | -0.41 | 0.17  | 0.48  | 0.854                    | 0.002 | 0.222 | 2E-04 | S3013                     | 0.21  | -0.24 | 0.43  | 0.50                    | 0.127 | 0.072 | 0.001 | 9E-05 |
| S3014 | 0.16                       | 0.12  | 0.29  | -0.05 | 0.244                    | 0.365 | 0.029 | 0.739 | S3014                     | 0.18  | 0.06  | 0.38  | 0.17                    | 0.183 | 0.638 | 0.005 | 0.211 |
| S3015 | -0.34                      | 0.20  | -0.43 | -0.48 | 0.012                    | 0.138 | 9E-04 | 2E-04 | S3015                     | -0.19 | 0.40  | -0.36 | -0.58                   | 0.167 | 0.002 | 0.008 | 4E-06 |
| S3016 | 0.23                       | -0.43 | 0.40  | 0.68  | 0.098                    | 0.001 | 0.002 | 1E-08 | S3016                     | 0.28  | -0.37 | 0.43  | 0.61                    | 0.042 | 0.006 | 1E-03 | 7E-07 |
