# Supplementary material for: Illumina MiSeq Phylogenetic Amplicon Sequencing Shows a Large Reduction of an Uncharacterised Succinivibrionaceae and an Increase of the Methanobrevibacter gottschalkii Clade in Feed Restricted Cattle
Source: PubMed Central journal article supplement (PMC4520551; doi:10.1371/journal.pone.0133234), 2015-07-30
Supplement: pone.0133234.s004.pdf [file pone.0133234.s004.pdf]

Liquid Spearman rho values

|       | M1    | M2    | M3    | M4    | M5    | M6    | M7    | M8    | M9    | M10   | M11   | M12   | M13   | M14   | M15   | M16   | M17   | M18   | M19   | M20   | T21   | T22   | T23   | T24   | T25   | T26   | T27   |
|-------|-------|-------|-------|-------|-------|-------|-------|-------|-------|-------|-------|-------|-------|-------|-------|-------|-------|-------|-------|-------|-------|-------|-------|-------|-------|-------|-------|
| S3000 | 0.32  | -0.11 | 0.36  | -0.06 | -0.08 | 0.15  | 0.55  | 0.28  | 0.42  | 0.08  | 0.24  | 0.19  | -0.24 | -0.16 | 0.10  | 0.40  | 0.46  | -0.18 | -0.43 | -0.37 | -0.10 | 0.22  | 0.09  | -0.16 | -0.28 | -0.52 | 0.46  |
| S3001 | 0.02  | 0.08  | 0.27  | -0.10 | -0.17 | 0.11  | 0.17  | 0.06  | 0.10  | 0.07  | 0.02  | 0.04  | -0.18 | -0.04 | 0.02  | 0.15  | 0.12  | 0.01  | -0.15 | 0.01  | 0.10  | -0.13 | -0.09 | -0.02 | 0.23  | -0.33 | 0.20  |
| S3002 | -0.25 | 0.24  | -0.16 | 0.49  | 0.20  | 0.23  | -0.50 | 0.05  | -0.33 | -0.16 | 0.27  | 0.23  | 0.26  | 0.26  | 0.17  | -0.29 | -0.37 | 0.24  | 0.53  | 0.24  | 0.30  | -0.14 | -0.23 | 0.08  | 0.14  | 0.43  | -0.15 |
| S3003 | 0.64  | -0.17 | 0.18  | -0.18 | -0.05 | 0.15  | 0.66  | 0.27  | 0.67  | 0.26  | 0.18  | 0.27  | -0.24 | -0.16 | 0.12  | 0.30  | 0.80  | -0.06 | -0.35 | -0.21 | -0.41 | 0.04  | 0.17  | -0.11 | -0.22 | -0.49 | 0.48  |
| S3004 | -0.25 | 0.20  | -0.22 | 0.26  | -0.09 | -0.06 | -0.72 | -0.21 | -0.40 | -0.35 | 0.09  | 0.08  | 0.25  | 0.06  | 0.25  | -0.27 | -0.36 | 0.22  | 0.51  | 0.12  | 0.12  | 0.13  | -0.12 | 0.10  | 0.32  | 0.51  | -0.29 |
| S3005 | 0.15  | 0.01  | 0.17  | -0.13 | 0.15  | 0.05  | 0.57  | 0.17  | 0.34  | 0.30  | -0.06 | -0.06 | -0.18 | 0.17  | -0.18 | 0.08  | 0.24  | -0.01 | -0.40 | -0.05 | -0.03 | 0.00  | 0.04  | -0.16 | -0.30 | -0.48 | 0.43  |
| S3006 | 0.29  | -0.13 | 0.26  | -0.01 | 0.02  | 0.22  | 0.66  | 0.27  | 0.62  | 0.05  | 0.08  | 0.09  | -0.29 | -0.20 | 0.11  | 0.41  | 0.50  | -0.25 | -0.49 | -0.22 | 0.01  | 0.12  | 0.13  | 0.02  | 0.43  | -0.55 | 0.37  |
| S3007 | -0.33 | 0.29  | -0.21 | 0.39  | -0.15 | -0.20 | -0.53 | -0.14 | -0.40 | -0.13 | 0.09  | 0.04  | 0.36  | 0.09  | 0.18  | -0.11 | -0.53 | 0.19  | 0.63  | -0.02 | 0.01  | -0.01 | -0.12 | -0.01 | 0.15  | 0.47  | -0.29 |
| S3008 | 0.38  | -0.21 | 0.24  | -0.18 | 0.08  | 0.02  | 0.66  | 0.27  | 0.50  | 0.18  | 0.08  | 0.09  | -0.20 | -0.24 | 0.09  | 0.37  | 0.61  | -0.18 | -0.46 | -0.13 | -0.15 | 0.18  | 0.11  | -0.02 | -0.38 | -0.61 | 0.51  |
| S3009 | 0.21  | 0.03  | 0.36  | -0.11 | 0.08  | 0.20  | 0.63  | 0.32  | 0.53  | -0.01 | 0.15  | 0.09  | -0.26 | -0.18 | 0.06  | 0.37  | 0.46  | -0.24 | -0.48 | -0.16 | 0.01  | 0.14  | 0.01  | -0.01 | -0.39 | -0.59 | 0.31  |
| S3010 | 0.22  | 0.03  | 0.19  | -0.03 | 0.15  | 0.04  | 0.51  | 0.28  | 0.39  | 0.26  | -0.03 | 0.05  | -0.19 | -0.17 | -0.05 | 0.10  | 0.39  | -0.13 | -0.39 | -0.15 | -0.11 | 0.04  | 0.13  | 0.12  | -0.50 | -0.38 | 0.35  |
| S3011 | 0.25  | -0.18 | 0.25  | -0.13 | -0.01 | 0.02  | 0.44  | 0.13  | 0.34  | 0.14  | -0.14 | -0.11 | -0.18 | -0.12 | -0.16 | 0.09  | 0.43  | -0.05 | -0.47 | -0.05 | -0.20 | 0.15  | 0.07  | 0.14  | -0.24 | -0.37 | 0.25  |
| S3012 | -0.23 | 0.14  | 0.03  | 0.00  | -0.40 | -0.26 | -0.36 | -0.16 | -0.17 | -0.19 | 0.24  | 0.15  | 0.07  | 0.12  | 0.05  | 0.05  | -0.23 | 0.15  | 0.18  | -0.02 | 0.02  | 0.16  | -0.15 | -0.04 | 0.18  | 0.27  | -0.09 |
| S3013 | 0.28  | -0.24 | 0.31  | -0.05 | 0.12  | 0.10  | 0.51  | 0.21  | 0.49  | 0.21  | 0.07  | 0.16  | -0.18 | -0.27 | -0.01 | 0.15  | 0.54  | -0.07 | -0.46 | -0.08 | -0.13 | 0.13  | 0.14  | 0.03  | -0.30 | -0.50 | 0.23  |
| S3014 | 0.03  | -0.12 | -0.01 | 0.01  | -0.32 | -0.07 | 0.05  | -0.06 | 0.03  | 0.05  | 0.03  | 0.02  | -0.27 | -0.06 | -0.06 | 0.05  | 0.08  | -0.33 | -0.26 | -0.18 | 0.03  | 0.00  | -0.06 | 0.11  | -0.10 | -0.18 | 0.22  |
| S3015 | -0.33 | 0.34  | -0.11 | 0.32  | -0.09 | 0.05  | -0.58 | -0.08 | -0.45 | -0.17 | 0.02  | 0.09  | 0.33  | 0.38  | 0.13  | -0.34 | -0.44 | 0.26  | 0.52  | 0.06  | 0.07  | 0.00  | -0.26 | 0.20  | 0.26  | 0.70  | -0.34 |
| S3016 | 0.51  | -0.07 | 0.11  | -0.18 | 0.11  | 0.18  | 0.69  | 0.25  | 0.48  | 0.26  | 0.08  | 0.10  | -0.34 | 0.03  | -0.01 | 0.24  | 0.58  | -0.18 | -0.50 | -0.01 | -0.13 | 0.06  | 0.28  | 0.06  | -0.49 | -0.51 | 0.48  |

Liquid Spearman P values

|       | M1   | M2   | M3   | M4   | M5   | M6   | M7   | M8   | M9   | M10  | M11  | M12  | M13  | M14  | M15  | M16  | M17  | M18  | M19  | M20  | T21  | T22  | T23  | T24  | T25  | T26  | T27  |
|-------|------|------|------|------|------|------|------|------|------|------|------|------|------|------|------|------|------|------|------|------|------|------|------|------|------|------|------|
| S3000 | 0.02 | 0.43 | 0.01 | 0.66 | 0.58 | 0.29 | 0    | 0.04 | 0    | 0.57 | 0.08 | 0.16 | 0.08 | 0.24 | 0.45 | 0    | 0    | 0.2  | 0    | 0.01 | 0.45 | 0.1  | 0.5  | 0.25 | 0.04 | 0    | 0    |
| S3001 | 0.91 | 0.58 | 0.05 | 0.48 | 0.22 | 0.41 | 0.22 | 0.68 | 0.47 | 0.63 | 0.87 | 0.78 | 0.18 | 0.77 | 0.89 | 0.27 | 0.37 | 0.93 | 0.27 | 0.93 | 0.47 | 0.36 | 0.52 | 0.86 | 0.09 | 0.01 | 0.15 |
| S3002 | 0.07 | 0.07 | 0.25 | 0    | 0.15 | 0.1  | 0    | 0.74 | 0.02 | 0.23 | 0.05 | 0.09 | 0.06 | 0.06 | 0.21 | 0.03 | 0.01 | 0.08 | 0    | 0.07 | 0.03 | 0.3  | 0.1  | 0.54 | 0.31 | 0    | 0.27 |
| S3003 | 0    | 0.23 | 0.19 | 0.19 | 0.69 | 0.28 | 0    | 0.05 | 0    | 0.06 | 0.19 | 0.05 | 0.08 | 0.24 | 0.4  | 0.03 | 0    | 0.67 | 0.01 | 0.13 | 0    | 0.77 | 0.21 | 0.42 | 0.11 | 0    | 0    |
| S3004 | 0.06 | 0.13 | 0.1  | 0.05 | 0.54 | 0.65 | 0    | 0.12 | 0    | 0.01 | 0.52 | 0.58 | 0.06 | 0.65 | 0.07 | 0.05 | 0.01 | 0.11 | 0    | 0.36 | 0.39 | 0.34 | 0.37 | 0.48 | 0.02 | 0    | 0.03 |
| S3005 | 0.26 | 0.93 | 0.22 | 0.34 | 0.29 | 0.71 | 0    | 0.22 | 0.01 | 0.02 | 0.69 | 0.65 | 0.18 | 0.21 | 0.19 | 0.54 | 0.07 | 0.94 | 0    | 0.7  | 0.81 | 0.98 | 0.78 | 0.23 | 0.03 | 0    | 0    |
| S3006 | 0.03 | 0.33 | 0.05 | 0.93 | 0.9  | 0.1  | 0    | 0.04 | 0    | 0.72 | 0.56 | 0.52 | 0.03 | 0.15 | 0.43 | 0    | 0    | 0.07 | 0    | 0.11 | 0.95 | 0.39 | 0.36 | 0.88 | 0    | 0    | 0.01 |
| S3007 | 0.01 | 0.03 | 0.12 | 0    | 0.27 | 0.15 | 0    | 0.3  | 0    | 0.36 | 0.53 | 0.8  | 0.01 | 0.52 | 0.19 | 0.44 | 0    | 0.17 | 0    | 0.91 | 0.94 | 0.96 | 0.37 | 0.92 | 0.27 | 0    | 0.03 |
| S3008 | 0    | 0.12 | 0.08 | 0.2  | 0.55 | 0.87 | 0    | 0.04 | 0    | 0.19 | 0.55 | 0.49 | 0.15 | 0.08 | 0.52 | 0.01 | 0    | 0.19 | 0    | 0.35 | 0.27 | 0.18 | 0.43 | 0.91 | 0    | 0    | 0    |
| S3009 | 0.12 | 0.84 | 0.01 | 0.41 | 0.58 | 0.14 | 0    | 0.02 | 0    | 0.96 | 0.27 | 0.5  | 0.06 | 0.2  | 0.66 | 0.01 | 0    | 0.08 | 0    | 0.23 | 0.93 | 0.29 | 0.93 | 0.93 | 0    | 0    | 0.02 |
| S3010 | 0.11 | 0.85 | 0.17 | 0.85 | 0.28 | 0.75 | 0    | 0.04 | 0    | 0.06 | 0.84 | 0.71 | 0.16 | 0.23 | 0.73 | 0.45 | 0    | 0.34 | 0    | 0.28 | 0.44 | 0.78 | 0.34 | 0.39 | 0    | 0    | 0.01 |
| S3011 | 0.06 | 0.18 | 0.06 | 0.35 | 0.97 | 0.89 | 0    | 0.33 | 0.01 | 0.3  | 0.3  | 0.41 | 0.2  | 0.37 | 0.24 | 0.52 | 0    | 0.73 | 0    | 0.71 | 0.15 | 0.28 | 0.62 | 0.3  | 0.08 | 0.01 | 0.07 |
| S3012 | 0.09 | 0.29 | 0.83 | 0.98 | 0    | 0.06 | 0.01 | 0.25 | 0.21 | 0.16 | 0.08 | 0.28 | 0.62 | 0.38 | 0.72 | 0.73 | 0.08 | 0.39 | 0.18 | 0.86 | 0.87 | 0.23 | 0.26 | 0.76 | 0.19 | 0.04 | 0.5  |
| S3013 | 0.04 | 0.07 | 0.02 | 0.71 | 0.36 | 0.45 | 0    | 0.13 | 0    | 0.13 | 0.63 | 0.24 | 0.2  | 0.05 | 0.92 | 0.29 | 0    | 0.63 | 0    | 0.57 | 0.34 | 0.35 | 0.3  | 0.82 | 0.03 | 0    | 0.1  |
| S3014 | 0.84 | 0.37 | 0.95 | 0.92 | 0.02 | 0.64 | 0.71 | 0.65 | 0.81 | 0.74 | 0.83 | 0.87 | 0.05 | 0.67 | 0.66 | 0.7  | 0.58 | 0.01 | 0.06 | 0.18 | 0.83 | 0.98 | 0.64 | 0.44 | 0.47 | 0.19 | 0.1  |
| S3015 | 0.01 | 0.01 | 0.45 | 0.02 | 0.52 | 0.74 | 0    | 0.58 | 0    | 0.2  | 0.88 | 0.52 | 0.01 | 0    | 0.35 | 0.01 | 0    | 0.06 | 0    | 0.66 | 0.04 | 0.99 | 0.05 | 0.13 | 0.06 | 0    | 0.01 |
| S3016 | 0    | 0.6  | 0.42 | 0.19 | 0.41 | 0.19 | 0    | 0.06 | 0    | 0.06 | 0.57 | 0.45 | 0.01 | 0.83 | 0.94 | 0.08 | 0    | 0.19 | 0    | 0.93 | 0.34 | 0.66 | 0.04 | 0.66 | 0    | 0    | 0    |

Solid Spearman rho values

|       | M1    | M2    | M3    | M4    | M5    | M6    | M7    | M8    | M9    | M10   | M11   | M12   | M13   | M14   | M15   | M16   | M17   | M18   | M19   | M20   | T21   | T22   | T23   | T24   | T25   | T26   | T27   |
|-------|-------|-------|-------|-------|-------|-------|-------|-------|-------|-------|-------|-------|-------|-------|-------|-------|-------|-------|-------|-------|-------|-------|-------|-------|-------|-------|-------|
| S3000 | 0.39  | -0.24 | 0.1   | -0.14 | 0.26  | 0.37  | 0.48  | 0.14  | 0.05  | -0.24 | 0.27  | 0.15  | 0.06  | -0.13 | -0.25 | 0.14  | 0.39  | -0.05 | -0.21 | 0.17  | 0.15  | 0.3   | 0.03  | -0.01 | -0.17 | -0.52 | 0.3   |
| S3001 | 0.22  | -0.11 | 0.13  | -0.12 | 0.26  | 0.23  | 0.4   | 0.28  | 0.25  | -0.08 | 0.03  | 0.36  | 0.04  | -0.08 | 0.03  | 0.03  | 0.26  | -0.03 | -0.27 | 0.05  | 0.2   | 0.07  | 0.19  | -0.24 | 0.03  | -0.33 | 0.26  |
| S3002 | -0.58 | 0.39  | -0.27 | -0.13 | -0.11 | -0.47 | -0.32 | -0.13 | -0.07 | 0.34  | -0    | -0.06 | -0.07 | -0.05 | 0.17  | -0.17 | -0.58 | -0.16 | 0.29  | -0.2  | -0.04 | -0.32 | -0.25 | 0.03  | 0.04  | 0.36  | -0.27 |
| S3003 | 0.78  | -0.36 | 0.24  | -0.05 | 0.19  | 0.47  | 0.6   | 0.24  | 0.04  | -0.4  | 0.19  | 0.44  | -0.01 | -0.14 | -0.35 | 0.1   | 0.9   | -0.09 | -0.23 | 0.22  | 0.02  | 0.44  | 0.37  | 0.01  | -0.04 | -0.65 | 0.43  |
| S3004 | -0.09 | -0.01 | 0.18  | 0.06  | -0.11 | -0.34 | -0.24 | -0.08 | -0.29 | -0.05 | -0.13 | -0.02 | 0.15  | 0.05  | -0.07 | -0.21 | -0.08 | -0.04 | 0.18  | 0.13  | -0.03 | -0.12 | 0.04  | -0.03 | 0.06  | 0.16  | -0.32 |
| S3005 | 0.44  | -0.21 | 0.15  | -0.07 | 0.41  | 0.27  | 0.55  | 0.36  | 0.24  | -0.15 | 0.21  | 0.43  | 0.22  | -0.1  | 0     | 0.18  | 0.5   | 0.09  | -0.18 | 0.2   | 0.27  | 0.38  | 0.37  | -0.04 | -0.12 | -0.52 | 0.31  |
| S3006 | 0.26  | -0.22 | 0.1   | -0.12 | 0.37  | 0.25  | 0.52  | 0.23  | 0.28  | -0.35 | 0.31  | 0.13  | 0.18  | -0.16 | -0.17 | 0.29  | 0.39  | -0.17 | -0.1  | 0.14  | 0.15  | 0.25  | 0.33  | 0.04  | -0.08 | -0.27 | 0.32  |
| S3007 | -0.53 | 0.49  | -0.06 | 0.16  | -0.22 | -0.31 | -0.56 | -0.27 | -0.2  | 0.27  | -0.06 | -0.19 | -0.06 | 0.17  | 0.16  | -0.23 | -0.6  | 0.01  | 0.33  | -0.07 | 0.07  | -0.2  | -0.27 | 0.23  | -0.06 | 0.59  | -0.46 |
| S3008 | 0.45  | -0.33 | 0.29  | 0.06  | 0.23  | 0.26  | 0.53  | 0.29  | 0.11  | -0.37 | 0.22  | 0.29  | 0.12  | -0.21 | -0.18 | 0.19  | 0.5   | -0.04 | -0.14 | 0.21  | 0.11  | 0.2   | 0.3   | -0.11 | -0.17 | -0.71 | 0.4   |
| S3009 | 0.42  | -0.31 | 0.21  | 0.1   | 0.29  | 0.31  | 0.5   | 0.27  | 0.09  | -0.36 | 0.3   | 0.29  | 0.17  | -0.15 | -0.3  | 0.19  | 0.46  | -0.11 | -0.11 | 0.29  | 0.09  | 0.39  | 0.23  | -0.01 | -0.19 | -0.67 | 0.39  |
| S3010 | 0.53  | -0.28 | 0.42  | -0.09 | 0.28  | 0.39  | 0.56  | 0.19  | 0.02  | -0.37 | 0.35  | 0.39  | 0.16  | -0.12 | -0.23 | 0.06  | 0.6   | 0.07  | -0.21 | 0.18  | 0.12  | 0.36  | 0.3   | -0.06 | -0.21 | -0.74 | 0.43  |
| S3011 | 0.37  | -0.16 | 0.01  | -0.06 | 0.24  | 0.16  | 0.53  | 0.17  | 0.09  | -0.16 | 0.14  | 0.39  | 0.02  | -0.04 | -0.28 | 0.03  | 0.4   | -0.02 | -0.18 | 0.15  | -0.02 | 0.24  | 0.2   | -0.21 | -0.15 | -0.55 | 0.43  |
| S301  |       |       |       |       |       |       |       |       |       |       |       |       |       |       |       |       |       |       |       |       |       |       |       |       |       |       |       |
