# Supplementary material for: Illumina MiSeq Phylogenetic Amplicon Sequencing Shows a Large Reduction of an Uncharacterised Succinivibrionaceae and an Increase of the Methanobrevibacter gottschalkii Clade in Feed Restricted Cattle
Source: PLoS One. 2015 Jul 30;10(7):e0133234. doi: 10.1371/journal.pone.0133234 (PMC4520551; doi:10.1371/journal.pone.0133234)
Supplement: S1 Table — Relative abundances (%) of prokaryotic OTUs (comprised of sequence reads that share 97% sequence identity) and their taxonomic assignments in rumen solid and liquid fractions in groups R, A, RA and AA. Relative OTU abundances for individual animals are shown and P values, FDR are shown for comparison (T-test assuming unequal variance) between Log2 transformed relative abundance (%) for OTUs in groups LR and LA, SR and SA, LRA and LAA, SRA and SAA. (XLSX) [file pone.0133234.s001.xlsx]

## Sheet: LR vs. LA
QIIME Taxanomic Assignment	O.T.U. number	FDR	LR/LA Log2 fold change	LR Average	LA Average	LR STDEV	LA STDEV	LR5	LR6	LR8	LR9	LR10	LR13	LR14	LR19	LR21	LR22	LR25	LR27	LR29	LR30	LA1	LA2	LA3	LA4	LA12	LA15	LA16	LA17	LA20	LA23	LA24	LA26	LA28
k__Archaea; p__Euryarchaeota; c__Methanobacteria; o__Methanobacteriales; f__Methanobacteriaceae; g__; s__	1	0.00221618	#DIV/0!	0.00552968	0	0.00661159	0	0.00774353	0.00875427	0.00027018	0.00108347	0	0.0129818	0.00560439	0.0010114	0.0052	0.0114596	0	0.000986242	0.0223207	0	0	0	0	0	0	0	0	0	0	0	0	0	0
k__Archaea; p__Euryarchaeota; c__Methanobacteria; o__Methanobacteriales; f__Methanobacteriaceae; g__; s__	2	0.000967903	-4.09518	0.000339337	0.00579966	0.000789242	0.00655327	0	0	0	0.000361157	0.000286393	0.000276208	0	0.000505699	0	0.000309718	0	0	0	0.00301155	0.0235889	0.00836377	0.00130995	0.0130724	0.000247587	0.000499749	0.00217043	0.00493819	0.00220668	0.00296598	0.00163036	0.00575416	0.00864742
k__Archaea; p__Euryarchaeota; c__Methanobacteria; o__Methanobacteriales; f__Methanobacteriaceae; g__Methanobrevibacter; s__	3	0.2764	0.227333	0.0813458	0.0694866	0.149389	0.137119	0.573022	0.0787884	0.00621415	0.0743983	0.0315032	0.134513	0.136865	0.0015171	0.00115556	0.0235386	0	0	0.0637735	0.013552	0	0.331763	0.00654973	0	0.408766	0.00574711	0	0.0131685	0	0.0965293	0	0.0408022	0
k__Archaea; p__Euryarchaeota; c__Methanobacteria; o__Methanobacteriales; f__Methanobacteriaceae; g__Methanobrevibacter; s__	4	0.330922	-9.04635	5.91874e-05	0.0312932	0.000221459	0.0862998	0	0	0	0	0	0.000828624	0	0	0	0	0	0	0	0	0.0013105	0	0	0	0.00792277	0	0	0	0	0.306036	0	0.0915435	0
k__Archaea; p__Euryarchaeota; c__Methanobacteria; o__Methanobacteriales; f__Methanobacteriaceae; g__Methanobrevibacter; s__	5	0.000497244	4.83777	0.0918956	0.00321351	0.0767066	0.00621416	0.150999	0.148823	0.0172915	0.150602	0.0581377	0.0422598	0.107073	0.139067	0.0326444	0.284321	0.0547786	0.0226836	0.0733395	0.00451732	0.00655248	0.00836377	0	0	0.00247587	0.000499749	0.00155031	0.0218103	0	0	0	0.000523106	0
k__Archaea; p__Euryarchaeota; c__Methanobacteria; o__Methanobacteriales; f__Methanobacteriaceae; g__Methanobrevibacter; s__	6	0.000497244	3.77513	0.0811789	0.00592947	0.0427307	0.0150169	0.123897	0.0612799	0.010537	0.116293	0.0601425	0.0582799	0.0781665	0.115299	0.0392889	0.160744	0.107226	0.0542433	0.117981	0.033127	0.00262099	0.0529705	0	0	0.00272345	0.000249874	0	0.0185182	0	0	0	0	0
k__Archaea; p__Euryarchaeota; c__Methanobacteria; o__Methanobacteriales; f__Methanobacteriaceae; g__Methanobrevibacter; s__	7	0.00305382	1.65799	4.82431	1.52873	1.95003	2.75491	7.59254	5.84785	1.4071	4.87056	2.4289	5.6653	5.25426	4.75054	4.72535	6.52917	5.58159	3.3838	7.65282	1.8506	0.929141	5.3082	0.582926	0.765327	0.199555	0.229385	0.311611	9.50807	0.401615	0.279881	0.577149	0.489104	0.291542
k__Archaea; p__Euryarchaeota; c__Methanobacteria; o__Methanobacteriales; f__Methanobacteriaceae; g__Methanobrevibacter; s__	8	0.00221618	2.84044	0.00772653	0.00107877	0.00846905	0.00303773	0.0232306	0	0.00297198	0.00433388	0.00257753	0.00828624	0.0135685	0.00353989	0.00288889	0.00464578	0.00699301	0.00493121	0.0286981	0.00150577	0.0013105	0	0	0	0	0.000499749	0.000310061	0.0111109	0	0.000269635	0	0.000523106	0
k__Archaea; p__Euryarchaeota; c__Methanobacteria; o__Methanobacteriales; f__Methanobacteriaceae; g__Methanobrevibacter; s__	9	0.0341146	2.97533	0.0024334	0.000309421	0.00417557	0.000819145	0.00387177	0	0.00027018	0.00180578	0.00229114	0.00966728	0.000589936	0	0.000288889	0.000309718	0.0011655	0.0138074	0	0	0	0.00278792	0	0	0	0	0	0.00123455	0	0	0	0	0
k__Archaea; p__Euryarchaeota; c__Methanobacteria; o__Methanobacteriales; f__Methanobacteriaceae; g__Methanobrevibacter; s__	10	0.174404	0.416712	1.579	1.18288	0.711811	0.593176	1.00279	1.34816	0.848637	0.879417	1.16734	1.9597	1.30022	2.03291	1.07582	0.918315	2.7331	2.31076	3.00054	1.52836	2.33399	1.5919	1.47238	1.30842	0.603121	0.749124	2.2374	1.23126	0.67745	0.919185	0.736924	0.526767	0.989512
k__Archaea; p__Euryarchaeota; c__Methanobacteria; o__Methanobacteriales; f__Methanobacteriaceae; g__Methanobrevibacter; s__	11	0.190108	2.72874	0.00129492	0.000195349	0.0020852	0.000367321	0	0	0.00351235	0.000361157	0	0.00193346	0.000589936	0.0010114	0.00722222	0.000309718	0	0	0.00318867	0	0	0	0	0	0.000495173	0.000499749	0.000310061	0.00123455	0	0	0	0	0
k__Archaea; p__Euryarchaeota; c__Methanobacteria; o__Methanobacteriales; f__Methanobacteriaceae; g__Methanobrevibacter; s__	12	0.296935	2.5363	0.00151062	0.000260407	0.00255546	0.000602333	0	0	0.00324217	0	0.000572785	0.00276208	0.000589936	0	0.00924444	0.00154859	0	0	0.00318867	0	0	0	0	0	0.000247587	0.000249874	0	0.000411516	0.00220668	0.000269635	0	0	0
k__Archaea; p__Euryarchaeota; c__Methanobacteria; o__Methanobacteriales; f__Methanobacteriaceae; g__Methanosphaera; s__	13	0.239594	#NUM!	0	0.000270511	0	0.000615351	0	0	0	0	0	0	0	0	0	0	0	0	0	0	0	0	0	0	0.000247587	0	0	0	0.00220668	0.00053927	0	0.000523106	0
k__Archaea; p__Euryarchaeota; c__Methanobacteria; o__Methanobacteriales; f__Methanobacteriaceae; g__Methanosphaera; s__	14	1	#DIV/0!	0	0	0	0	0	0	0	0	0	0	0	0	0	0	0	0	0	0	0	0	0	0	0	0	0	0	0	0	0	0	0
k__Archaea; p__Euryarchaeota; c__Methanobacteria; o__Methanobacteriales; f__Methanobacteriaceae; g__Methanosphaera; s__	15	0.135107	0.365371	0.135051	0.104836	0.0462267	0.0350825	0.162614	0.175085	0.0710575	0.0888446	0.0907865	0.159648	0.168427	0.147158	0.1118	0.211847	0.203963	0.111445	0.105226	0.0828176	0.111392	0.119881	0.107416	0.080811	0.0760091	0.0554721	0.104801	0.177363	0.0639936	0.134817	0.0929307	0.152747	0.0852389
k__Archaea; p__Euryarchaeota; c__Methanobacteria; o__Methanobacteriales; f__Methanobacteriaceae; g__Methanosphaera; s__	16	0.55066	4.29999	0.00242426	0.00012307	0.00721111	0.000339697	0.0271024	0	0.000810541	0	0.00458228	0	0	0	0.00144444	0	0	0	0	0	0	0	0	0.0011884	0	0	0	0.000411516	0	0	0	0	0
k__Archaea; p__Euryarchaeota; c__Methanomicrobia; o__Methanomicrobiales	17	0.000514711	11.8872	0.0785636	2.07411e-05	0.0950992	7.47832e-05	0.348459	0.131314	0.00324217	0.00975124	0.00887817	0.0856245	0.0327414	0.0561326	0.0257111	0.1211	0.00582751	0.108487	0.162622	0	0	0	0	0	0	0	0	0	0	0.000269635	0	0	0
k__Archaea; p__Euryarchaeota; c__Methanomicrobia; o__Methanosarcinales; f__Methanosarcinaceae; g__Methanimicrococcus; s__	18	0.206077	-1.63123	0.000689817	0.0021369	0.00209017	0.00269206	0	0	0	0	0.000859178	0	0	0	0.000288889	0.000619437	0	0.00788994	0	0	0	0	0.00261989	0	0.00346621	0.00499749	0	0	0.00662003	0.00161781	0	0.00104621	0.00741207
k__Archaea; p__Euryarchaeota; c__Methanomicrobia; o__Methanosarcinales; f__Methanosarcinaceae; g__Methanimicrococcus; s__	19	0.011125	-0.862751	0.000829664	0.00150875	0.00310432	0.00181997	0.0116153	0	0	0	0	0	0	0	0	0	0	0	0	0	0.0013105	0	0	0.0011884	0.00173311	0.00699648	0	0.000411516	0.00220668	0.000808904	0.00163036	0.00209242	0.00123535
k__Archaea; p__Euryarchaeota; c__Thermoplasmata; o__E2; f__[Methanomassiliicoccaceae]; g__vadinCA11; s__	20	0.00139711	1.84688	0.122239	0.0339817	0.0513709	0.0289903	0.108409	0.0700341	0.0226952	0.177689	0.162385	0.157439	0.202053	0.179523	0.121333	0.153311	0.0874126	0.0710094	0.0956602	0.102393	0.110082	0.0390309	0.0144094	0.011884	0.00817036	0.0232383	0.00868171	0.0720153	0.0132401	0.0374792	0.0277162	0.0350481	0.0407664
k__Archaea; p__Euryarchaeota; c__Thermoplasmata; o__E2; f__[Methanomassiliicoccaceae]; g__vadinCA11; s__	21	0.000794953	2.83916	0.133131	0.0186041	0.0545676	0.0421319	0.123897	0.157577	0.0221548	0.102207	0.100237	0.141418	0.168427	0.253861	0.117	0.212157	0.109557	0.12328	0.111604	0.120462	0.00655248	0.036243	0.00130995	0.0142608	0.00123793	0.00624686	0	0.155141	0.00662003	0.00242671	0.00815182	0.00366174	0
k__Archaea; p__Euryarchaeota; c__Thermoplasmata; o__E2; f__[Methanomassiliicoccaceae]; g__vadinCA11; s__	22	0.0614995	1.45615	0.0198415	0.00723155	0.0190312	0.00630446	0.0542047	0	0.00216144	0.0119182	0.0203339	0.0591085	0.0129786	0.0247793	0.0184889	0.0408828	0.002331	0.00295873	0.00956602	0.0180693	0	0.0111517	0.00130995	0.0011884	0.00148552	0.0152423	0.000930184	0.00823032	0.0176534	0.0115943	0.0146733	0.00313863	0.00741207
k__Archaea; p__Euryarchaeota; c__Thermoplasmata; o__E2; f__[Methanomassiliicoccaceae]; g__vadinCA11; s__	23	0.422404	#DIV/0!	0.0105782	0	0.0333263	0	0.0232306	0	0	0	0	0	0	0.000505699	0	0	0	0	0.124358	0	0	0	0	0	0	0	0	0	0	0	0	0	0
k__Archaea; p__Euryarchaeota; c__Thermoplasmata; o__E2; f__[Methanomassiliicoccaceae]; g__vadinCA11; s__	24	0.786803	0.21915	0.0251281	0.0215869	0.0379168	0.0182332	0.147127	0	0.0113476	0.0158909	0.0100237	0.0566226	0.00235974	0.0197223	0.0239778	0.0229192	0.0221445	0.00690369	0.0127547	0	0.0222784	0.00836377	0.0288188	0.0202027	0.00891312	0.0289854	0.00589116	0.0662541	0.0110334	0.00889795	0.0114125	0.049695	0.00988277
k__Archaea; p__Euryarchaeota; c__Thermoplasmata; o__E2; f__[Methanomassiliicoccaceae]; g__vadinCA11; s__	25	0.0021887	1.70315	0.246249	0.0756268	0.110487	0.074905	0.166486	0.446468	0.118879	0.237641	0.392644	0.229529	0.266946	0.309994	0.298133	0.370733	0.144522	0.20218	0.0510188	0.212314	0.0524198	0.189579	0.0392984	0.0522894	0.000247587	0.0109945	0.122164	0.242794	0.0838537	0.00377489	0.0782575	0	0.107475
k__Archaea; p__Euryarchaeota; c__Thermoplasmata; o__E2; f__[Methanomassiliicoccaceae]; g__vadinCA11; s__	26	0.000666541	-8.24928	0.000118375	0.0360197	0.000442918	0.0359637	0	0	0	0	0	0.00165725	0	0	0	0	0	0	0	0	0.0144155	0	0.0157194	0.0011884	0.00891312	0.0664666	0.0452689	0.000411516	0.0529603	0.109472	0.0619538	0.0816045	0.00988277
k__Archaea; p__Euryarchaeota; c__Thermoplasmata; o__E2; f__[Methanomassiliicoccaceae]; g__vadinCA11; s__	27	0.0240997	2.04626	0.00312265	0.000756026	0.00293097	0.00130919	0	0.00875427	0.00189126	0.00469504	0.0040095	0.00193346	0.00884904	0.0020228	0.00115556	0.00495549	0	0.00394497	0	0.00150577	0.0013105	0	0	0	0	0	0.00372073	0.00329213	0	0.000269635	0	0	0.00123535
k__Bacteria	28	0.2764	-5.23392	8.06685e-05	0.00303578	0.000235353	0.00682534	0	0	0.00027018	0	0.000859178	0	0	0	0	0	0	0	0	0	0	0.0223034	0	0	0.00173311	0.0132433	0	0.00164606	0	0.00053927	0	0	0
k__Bacteria; p__Actinobacteria; c__Actinobacteria; o__Actinomycetales; f__Corynebacteriaceae; g__Corynebacterium; s__	29	0.21523	1.28504	0.00140472	0.000576441	0.00198037	0.00116042	0	0	0.00027018	0.000361157	0.000286393	0.00193346	0.00176981	0.0010114	0.00606666	0.00495549	0	0	0	0.00301155	0	0	0.00261989	0.00356519	0	0.000499749	0	0	0	0.000808904	0	0	0
k__Bacteria; p__Actinobacteria; c__Actinobacteria; o__Actinomycetales; f__Corynebacteriaceae; g__Corynebacterium; s__	30	0.879697	-0.213007	0.00235588	0.00273071	0.00258921	0.00410598	0	0	0	0.00108347	0.000286393	0.00138104	0.00471949	0.00505699	0.00173333	0.00712352	0	0.00690369	0.00318867	0.00150577	0.00393149	0	0.00130995	0	0.000990347	0.000749623	0.000620122	0.0131685	0.00220668	0.000269635	0.00978218	0	0.00247069
k__Bacteria; p__Actinobacteria; c__Actinobacteria; o__Actinomycetales; f__Corynebacteriaceae; g__Corynebacterium; s__	31	0.130986	-1.68448	0.000514609	0.00165408	0.000804575	0.00229643	0	0	0	0	0	0	0.00147484	0.0010114	0.000577778	0.00216803	0	0.00197248	0	0	0	0	0.00130995	0.00475359	0.00074276	0.00124937	0.00124024	0.00123455	0	0.00053927	0.00815182	0.00104621	0.00123535
k__Bacteria; p__Actinobacteria; c__Actinobacteria; o__Actinomycetales; f__Corynebacteriaceae; g__Corynebacterium; s__	32	0.125016	1.17735	0.00404013	0.00178639	0.00404733	0.00238555	0.00387177	0	0.00108072	0.00469504	0.00143196	0.00441933	0.00117987	0.0015171	0.0132889	0.0108401	0.00582751	0.00690369	0	0.00150577	0.00262099	0	0	0.00356519	0.000495173	0.00124937	0	0	0.00662003	0.0062016	0	0	0.00247069
k__Bacteria; p__Actinobacteria; c__Actinobacteria; o__Actinomycetales; f__Corynebacteriaceae; g__Corynebacterium; s__	33	0.977175	-0.280208	0.000610656	0.000741562	0.000989543	0.00131767	0	0	0	0	0	0.000828624	0.000589936	0.0010114	0.00231111	0.000619437	0	0	0.00318867	0	0	0	0	0.00356519	0.000247587	0.00149925	0	0.000823032	0	0.00350525	0	0	0
k__Bacteria; p__Actinobacteria; c__Actinobacteria; o__Actinomycetales; f__Corynebacteriaceae; g__Corynebacterium; s__	34	0.696815	0.911131	0.00326882	0.00173825	0.00457523	0.00186459	0	0	0	0.00180578	0.00114557	0.00524795	0.00117987	0.0030342	0.0167555	0.00619437	0.0034965	0.00690369	0	0	0.0013105	0.00278792	0.00392984	0.00475359	0	0.00124937	0.000310061	0.000411516	0	0.00458379	0.00326073	0	0
k__Bacteria; p__Actinobacteria; c__Actinobacteria; o__Actinomycetales; f__Corynebacteriaceae; g__Corynebacterium; s__	35	0.0222458	2.04928	0.0345489	0.00834716	0.0322583	0.00584841	0.0387177	0.0962969	0.00027018	0.00794545	0.00257753	0.0256873	0.00678426	0.0156767	0.0849333	0.0721644	0.0174825	0.0660782	0.0159434	0.033127	0.0144155	0.00557585	0.0117895	0.00475359	0.00519932	0.00699648	0.000930184	0.00411516	0.0154467	0.0153692	0.017934	0.00104621	0.00494138
k__Bacteria; p__Actinobacteria; c__Actinobacteria; o__Actinomycetales; f__Micrococcaceae; g__Kocuria; s__	36	0.34072	1.27856	0.00130009	0.000535905	0.00241181	0.00131128	0	0	0	0	0	0.00110483	0.00412955	0.000505699	0.00837777	0.00309718	0	0.000986242	0	0	0	0	0	0	0	0	0	0	0	0	0.00326073	0	0.00370604
k__Bacteria; p__Actinobacteria; c__Actinobacteria; o__Bifidobacteriales; f__Bifidobacteriaceae; g__; s__	37	0.0222458	-8.02889	0.000435618	0.113774	0.000779281	0.189051	0	0	0.00027018	0	0	0.00193346	0	0	0.000577778	0	0.002331	0.000986242	0	0	0.0157259	0	0.24627	0.0475359	0.253776	0.122688	0.0207741	0	0.0353068	0.0674087	0	0.669575	0
k__Bacteria; p__Actinobacteria; c__Actinobacteria; o__Bifidobacteriales; f__Bifidobacteriaceae; g__; s__	38	0.000458554	10.9185	0.196943	0.000101752	0.176921	0.000256991	0.549791	0.47273	0.0537659	0.0216694	0.209926	0.0571751	0.131261	0.0348932	0.191244	0.418739	0.0734266	0.0779131	0.341188	0.123474	0	0	0	0	0	0.000499749	0	0.000823032	0	0	0	0	0
k__Bacteria; p__Actinobacteria; c__Actinobacteria; o__Bifidobacteriales; f__Bifidobacteriaceae; g__Bifidobacterium	39	0.34072	1.55471	0.0803315	0.0273447	0.131061	0.0444204	0.0193588	0	0.424183	0.00108347	0.00801899	0.0215442	0.0159283	0.0121368	0.0288889	0.00619437	0.0897436	0.208097	0.00637735	0.283086	0.0117945	0.0139396	0.0589476	0.160434	0.000247587	0.00674661	0.000620122	0.0353904	0.0176534	0.00242671	0.0472806	0	0
k__Bacteria; p__Actinobacteria; c__Actinobacteria; o__Bifidobacteriales; f__Bifidobacteriaceae; g__Bifidobacterium; s__	40	0.422404	#DIV/0!	0.000418718	0	0.00102184	0	0	0	0.00324217	0	0	0	0	0	0.000288889	0	0.002331	0	0	0	0	0	0	0	0	0	0	0	0	0	0	0	0
k__Bacteria; p__Actinobacteria; c__Actinobacteria; o__Bifidobacteriales; f__Bifidobacteriaceae; g__Bifidobacterium; s__	41	0.148364	0.561094	0.000777785	0.000527173	0.00126272	0.00163588	0	0	0.00459307	0	0.000286393	0.000276208	0.000294968	0.000505699	0.000288889	0	0.0011655	0.00197248	0	0.00150577	0	0	0	0.00594198	0	0.000499749	0	0.000411516	0	0	0	0	0
k__Bacteria; p__Actinobacteria; c__Actinobacteria; o__Bifidobacteriales; f__Bifidobacteriaceae; g__Bifidobacterium; s__	42	0.000514711	-5.89666	0.00147849	0.0880827	0.00294049	0.0982131	0.00774353	0.00875427	0.000810541	0	0	0.00165725	0	0	0.00173333	0	0	0	0	0	0.107461	0.00278792	0.108726	0.38504	0.110671	0.103698	0.0517802	0.00164606	0.075027	0.0256153	0.0701056	0.0889279	0.0135888
k__Bacteria; p__Actinobacteria; c__Actinobacteria; o__Bifidobacteriales; f__Bifidobacteriaceae; g__Bifidobacterium; s__	43	0.661359	0.327603	0.00137359	0.00109456	0.00279451	0.00116202	0	0	0.0108072	0.000722314	0.000572785	0.000828624	0.00147484	0.0020228	0	0.000309718	0	0.000986242	0	0.00150577	0.0013105	0	0.00392984	0	0.00074276	0.001999	0.00124024	0.000411516	0	0.00107854	0	0.00104621	0.00247069
k__Bacteria; p__Actinobacteria; c__Actinobacteria; o__Bifidobacteriales; f__Bifidobacteriaceae; g__Bifidobacterium; s__	44	0.00737679	6.37872	1.16511	0.0140017	2.39845	0.0386121	0	0	9.31717	0.157464	0.0423861	0.778354	0.0492596	0.623527	0.844711	1.03694	0.889277	1.07993	0.00637735	1.4862	0	0.0139396	0.00392984	0.011884	0.00148552	0.00149925	0.000310061	0.141561	0.00662003	0.000269635	0	0.000523106	0
k__Bacteria; p__Actinobacteria; c__Actinobacteria; o__Bifidobacteriales; f__Bifidobacteriaceae; g__Bifidobacterium; s__adolescentis	45	0.119579	-5.20906	0.00138277	0.0511486	0.00517387	0.108041	0.0193588	0	0	0	0	0	0	0	0	0	0	0	0	0	0	0	0.296048	0.287592	0	0.000249874	0.000620122	0.0559662	0	0	0.0244555	0	0
k__Bacteria; p__Actinobacteria; c__Actinobacteria; o__Bifidobacteriales; f__Bifidobacteriaceae; g__Bifidobacterium; s__adolescentis	46	0.832255	2.45063	0.0194409	0.00355634	0.0528672	0.0055789	0	0	0.19534	0.00144463	0	0.0555178	0.000294968	0	0	0	0	0	0	0.0195751	0	0	0.00785968	0.0130724	0	0	0	0.0160491	0.00220668	0	0.00652146	0.000523106	0
k__Bacteria; p__Actinobacteria; c__Coriobacteriia; o__Coriobacteriales; f__Coriobacteriaceae	47	0.000514711	7.60349	0.0123126	6.33101e-05	0.0119486	0.000228268	0.0387177	0.00875427	0.00864577	0.00108347	0.000859178	0.00607658	0.00117987	0	0.0156	0.0312816	0.020979	0.0187386	0.0159434	0.00451732	0	0	0	0	0	0	0	0.000823032	0	0	0	0	0
k__Bacteria; p__Actinobacteria; c__Coriobacteriia; o__Coriobacteriales; f__Coriobacteriaceae; g__; s__	48	0.378476	1.18358	0.00178974	0.000787949	0.00230793	0.00121691	0	0	0.00027018	0	0.00200475	0.00635278	0.00117987	0.0015171	0.00231111	0.00123887	0.00699301	0	0.00318867	0	0	0	0	0.00356519	0	0.000249874	0	0.00205758	0	0.000269635	0.00163036	0	0.00247069
k__Bacteria; p__Actinobacteria; c__Coriobacteriia; o__Coriobacteriales; f__Coriobacteriaceae; g__; s__	49	0.731306	-0.861258	0.00410214	0.00745204	0.0102592	0.0210431	0	0	0.0391762	0.000361157	0.000286393	0.00138104	0	0.000505699	0.00433333	0.00123887	0.0011655	0.00295873	0	0.0060231	0.00393149	0	0.0772868	0.00475359	0.00272345	0.001999	0	0.000411516	0	0.00296598	0	0.00156932	0.00123535
k__Bacteria; p__Actinobacteria; c__Coriobacteriia; o__Coriobacteriales; f__Coriobacteriaceae; g__; s__	50	0.0939245	-1.78444	0.000942065	0.00324528	0.00110187	0.00366669	0	0	0.00324217	0	0.00200475	0.000828624	0.000884904	0.0020228	0.0026	0.000619437	0	0.000986242	0	0	0.00393149	0	0.00654973	0.0130724	0.00470415	0.00249874	0.00217043	0.00329213	0	0.00107854	0.00489109	0	0
k__Bacteria; p__Actinobacteria; c__Coriobacteriia; o__Coriobacteriales; f__Coriobacteriaceae; g__; s__	51	0.000551991	-8.57541	0.000159645	0.0608991	0.000457711	0.0491528	0	0	0	0	0	0.00165725	0	0	0.000577778	0	0	0	0	0	0.0864927	0.00278792	0.159813	0.0938833	0.0631346	0.136431	0.00651128	0	0.0331002	0.067948	0.0586931	0.0334788	0.0494138
k__Bacteria; p__Actinobacteria; c__Coriobacteriia; o__Coriobacteriales; f__Coriobacteriaceae; g__; s__	52	0.00575111	2.77432	0.00818085	0.00119576	0.00796034	0.00355815	0.00387177	0	0.00216144	0	0.00143196	0.00718141	0.0132736	0.000505699	0.00866666	0.0244677	0.00699301	0.0226836	0.0127547	0.0105404	0	0.00278792	0	0	0	0	0	0.012757	0	0	0	0	0
k__Bacteria; p__Actinobacteria; c__Coriobacteriia; o__Coriobacteriales; f__Coriobacteriaceae; g__; s__	53	0.00647832	3.0894	0.00878652	0.00103232	0.00896243	0.00175997	0.0154871	0.0262628	0.00351235	0.000722314	0.000572785	0.00828624	0.00147484	0.0015171	0.0236889	0.014247	0.00932401	0.00197248	0.0159434	0	0	0	0.00261989	0	0.000495173	0.00124937	0	0.00534971	0	0	0	0	0.00370604
k__Bacteria; p__Actinobacteria; c__Coriobacteriia; o__Coriobacteriales; f__Coriobacteriaceae; g__; s__	54	0.113613	-1.41276	0.108425	0.288677	0.0872265	0.3123	0.19746	0.105051	0.126174	0.00577851	0.0108829	0.0436409	0.00471949	0.0460186	0.230822	0.281844	0.101399	0.0828443	0.184943	0.0963696	1.07068	0.0975773	0.24758	0.0499127	0.154742	0.251374	0.0238747	0.0633734	0.169914	0.163668	0.145102	0.680037	0.634968
k__Bacteria; p__Actinobacteria; c__Coriobacteriia; o__Coriobacteriales; f__Coriobacteriaceae; g__; s__	55	0.0240997	-2.3488	0.00747068	0.0380556	0.00946475	0.0637887	0.00774353	0	0.00459307	0.000722314	0.000859178	0.00939107	0.000884904	0.0010114	0.00982222	0.0083624	0.018648	0.00295873	0.0350754	0.00451732	0.0288309	0.0167275	0.0314387	0.0451591	0.0579353	0.242628	0.0096119	0.0024691	0.00882671	0.0070105	0.00652146	0.0313863	0.00617673
k__Bacteria; p__Actinobacteria; c__Coriobacteriia; o__Coriobacteriales; f__Coriobacteriaceae; g__; s__	56	0.00327621	-8.4476	1.97291e-05	0.00688792	7.38197e-05	0.00796434	0	0	0	0	0	0.000276208	0	0	0	0	0	0	0	0	0.0248994	0	0.00523979	0.00475359	0.0138649	0.00524736	0	0	0.00220668	0.00512306	0.00163036	0.0204011	0.00617673
k__Bacteria; p__Actinobacteria; c__Coriobacteriia; o__Coriobacteriales; f__Coriobacteriaceae; g__; s__	57	0.0428566	1.74926	0.038223	0.0113696	0.0293161	0.0117897	0.0580765	0.0700341	0.04485	0.000722314	0.0037231	0.0254111	0.00176981	0.0015171	0.0647111	0.0861017	0.039627	0.0552295	0.0637735	0.0195751	0.0170364	0.0139396	0.0275089	0.0261447	0	0.00124937	0.0040308	0.00452667	0	0.00161781	0.0163036	0.00209242	0.0333543
k__Bacteria; p__Actinobacteria; c__Coriobacteriia; o__Coriobacteriales; f__Coriobacteriaceae; g__; s__	58	0.600367	2.23219	0.000189062	4.02389e-05	0.000429052	0.000145083	0	0	0.0013509	0	0	0	0	0	0	0.000309718	0	0.000986242	0	0	0	0	0	0	0	0	0	0	0	0	0	0.000523106	0
k__Bacteria; p__Actinobacteria; c__Coriobacteriia; o__Coriobacteriales; f__Coriobacteriaceae; g__; s__	59	0.00105731	-6.79111	0.00137281	0.152032	0.00206728	0.147048	0.00387177	0	0.000810541	0	0	0.00248587	0.00117987	0	0.000866666	0	0.00699301	0	0	0.00301155	0.259478	0.00278792	0.191252	0.0760574	0.247339	0.189655	0.0120924	0	0.103714	0.358075	0.0309769	0.459287	0.0457078
k__Bacteria; p__Actinobacteria; c__Coriobacteriia; o__Coriobacteriales; f__Coriobacteriaceae; g__; s__	60	0.00139711	2.97453	0.0391563	0.00498171	0.0470863	0.0127101	0.0154871	0.00875427	0.0294497	0.00613967	0.0143196	0.0441933	0.0082591	0.0025285	0.101689	0.0507938	0.0268065	0.175551	0.0446414	0.0195751	0	0.0418188	0	0	0	0	0.000310061	0.0226334	0	0	0	0	0
k__Bacteria; p__Actinobacteria; c__Coriobacteriia; o__Coriobacteriales; f__Coriobacteriaceae; g__; s__	61	0.575106	-1.10526	0.000700772	0.00150763	0.00123909	0.00231164	0	0	0	0	0	0	0	0	0.00144444	0.00185831	0.0034965	0	0	0.00301155	0.00262099	0	0.00392984	0.00713038	0.00173311	0	0	0	0	0	0	0.00418484	0
k__Bacteria; p__Actinobacteria; c__Coriobacteriia; o__Coriobacteriales; f__Coriobacteriaceae; g__; s__	62	0.296935	0.628097	0.00201036	0.00130076	0.00338462	0.00360608	0	0	0.00864577	0	0.000286393	0.000276208	0.00176981	0	0.0104	0.000619437	0	0.00295873	0.00318867	0	0	0	0.00261989	0	0.000247587	0.000999498	0	0	0	0	0.0130429	0	0
k__Bacteria; p__Actinobacteria; c__Coriobacteriia; o__Coriobacteriales; f__Coriobacteriaceae; g__; s__	63	0.0939245	#DIV/0!	0.000499522	0	0.000780244	0	0	0	0.000810541	0.000361157	0	0.00110483	0	0.000505699	0.00173333	0.00247775	0	0	0	0	0	0	0	0	0	0	0	0	0	0	0	0	0
k__Bacteria; p__Actinobacteria; c__Coriobacteriia; o__Coriobacteriales; f__Coriobacteriaceae; g__; s__	64	0.00187704	-2.35247	0.00741084	0.0378469	0.0104196	0.0241109	0.0271024	0	0.0162108	0	0	0.00580037	0.000294968	0	0.013	0.0303524	0.00699301	0.000986242	0	0.00301155	0.0366939	0.0195155	0.0406083	0.0320867	0.0581829	0.0832082	0.00279055	0.00370364	0.0485469	0.0296598	0.0260858	0.0355712	0.0753561
k__Bacteria; p__Actinobacteria; c__Coriobacteriia; o__Coriobacteriales; f__Coriobacteriaceae; g__; s__	65	0.010871	2.76635	0.00282941	0.000415855	0.00274633	0.000938222	0.00387177	0.00875427	0.00108072	0	0	0.000552416	0.000589936	0	0.00144444	0.00433606	0.004662	0.00493121	0.00637735	0.00301155	0	0.00278792	0	0	0	0	0	0.000411516	0.00220668	0	0	0	0
k__Bacteria; p__Actinobacteria; c__Coriobacteriia; o__Coriobacteriales; f__Coriobacteriaceae; g__; s__	66	0.0684362	1.60962	0.00431861	0.00141514	0.00397438	0.00234946	0.00774353	0	0.00810541	0.000722314	0.000286393	0.00552416	0	0.000505699	0.00953333	0.00898183	0.00699301	0.00887618	0.00318867	0	0	0	0.00523979	0.00713038	0	0.000499749	0.000620122	0.00164606	0	0	0.00326073	0	0
k__Bacteria; p__Actinobacteria; c__Coriobacteriia; o__Coriobacteriales; f__Coriobacteriaceae; g__; s__	67	0.566815	0.509665	0.00486323	0.00341586	0.0048182	0.00475033	0	0.00875427	0.00486325	0	0	0.00248587	0	0	0.00635555	0.0145568	0.0104895	0.00986242	0.00318867	0.00752887	0	0.00836377	0.0117895	0.0011884	0.00396139	0.00249874	0	0	0.00220668	0.000808904	0	0	0.0135888
k__Bacteria; p__Actinobacteria; c__Coriobacteriia; o__Coriobacteriales; f__Coriobacteriaceae; g__; s__	68	0.00502736	2.80166	0.0308448	0.00442383	0.0256428	0.00436886	0.0193588	0.0262628	0.0402569	0.00180578	0.00315032	0.013258	0.00147484	0.00809119	0.0442	0.0359273	0.0757576	0.0818581	0.0382641	0.0421617	0.00393149	0.00836377	0.00130995	0.011884	0.00173311	0.00149925	0	0.00493819	0	0.00242671	0.00978218	0.000523106	0.0111181
k__Bacteria; p__Actinobacteria; c__Coriobacteriia; o__Coriobacteriales; f__Coriobacteriaceae; g__; s__	69	0.0787326	1.21648	0.000662039	0.000284896	0.000953084	0.00102721	0	0	0.0013509	0.00108347	0	0.000276208	0.000294968	0.0010114	0.00346667	0.000619437	0.0011655	0	0	0	0	0	0	0	0	0	0	0.00370364	0	0	0	0	0
k__Bacteria; p__Actinobacteria; c__Coriobacteriia; o__Coriobacteriales; f__Coriobacteriaceae; g__; s__	70	0.385692	-1.49259	0.010072	0.0283421	0.0149922	0.0596188	0.0154871	0	0.00243162	0	0.000859178	0.00939107	0.00117987	0	0.0153111	0.0449092	0.0034965	0.00197248	0.0414528	0.00451732	0.00786297	0.0139396	0.0130995	0.00594198	0.0383759	0.015992	0	0.00164606	0	0.00242671	0.00978218	0.22232	0.0370604
k__Bacteria; p__Actinobacteria; c__Coriobacteriia; o__Coriobacteriales; f__Coriobacteriaceae; g__; s__	71	0.00737679	-3.1601	0.00280853	0.0251052	0.0069054	0.0201629	0.00774353	0	0.00162108	0	0	0.000276208	0.000294968	0	0.000288889	0	0.0034965	0	0	0.0255982	0.0537303	0	0.0668073	0.0225795	0.0354049	0.0319839	0.00279055	0	0.00662003	0.0237279	0.0293466	0.0224935	0.0308836
k__Bacteria; p__Actinobacteria; c__Coriobacteriia; o__Coriobacteriales; f__Coriobacteriaceae; g__; s__	72	0.00305382	-6.1793	0.00129793	0.0940603	0.00320822	0.183739	0.00774353	0	0	0	0	0.000276208	0	0	0.000288889	0	0	0.00986242	0	0	0.0458674	0.0111517	0.0288188	0.0166376	0.0366428	0.0129935	0	0	0.00220668	0.276376	0.00489109	0.647605	0.139594
k__Bacteria; p__Actinobacteria; c__Coriobacteriia; o__Coriobacteriales; f__Coriobacteriaceae; g__; s__	73	0.34072	-0.66855	0.0018798	0.00298789	0.00217471	0.00289527	0	0	0.00432289	0	0.00257753	0.00248587	0.00147484	0.0010114	0.00404444	0	0.0034965	0.00690369	0	0	0.0013105	0	0	0.00594198	0.00148552	0.00499749	0.00124024	0.00370364	0	0.000269635	0.00815182	0.00680037	0.00494138
k__Bacteria; p__Actinobacteria; c__Coriobacteriia; o__Coriobacteriales; f__Coriobacteriaceae; g__; s__	74	0.31925	0.825619	0.615508	0.347294	1.44029	0.26433	0.0542047	0.113805	5.5179	0.0350322	0.0398086	0.136171	0.00235974	0.105185	0.965755	0.342548	0.193473	0.342226	0.0127547	0.755899	0.382665	0.0557585	0.661523	0.835443	0.739046	0.196151	0.0430985	0.0839492	0.0816471	0.383151	0.353789	0.399653	0.298954
k__Bacteria; p__Actinobacteria; c__Coriobacteriia; o__Coriobacteriales; f__Coriobacteriaceae; g__; s__	75	0.00575111	2.31261	0.108516	0.0218439	0.126662	0.0572403	0.317485	0.0875427	0.0761909	0.00830661	0.0037231	0.0364595	0.0212377	0.0025285	0.154844	0.425863	0.137529	0.0542433	0.172188	0.0210808	0	0.209094	0.00261989	0.0011884	0.00074276	0.00324837	0.000310061	0.0337443	0	0.000808904	0.00489109	0.00261553	0.0247069
k__Bacteria; p__Actinobacteria; c__Coriobacteriia; o__Coriobacteriales; f__Coriobacteriaceae; g__; s__	76	0.0257688	2.02275	0.0185431	0.00456325	0.0162839	0.00717861	0.0232306	0.0350171	0.0148599	0.00288925	0	0.0127056	0.00117987	0.000505699	0.0286	0.0473869	0.011655	0.0216973	0.0478301	0.0120462	0.00524198	0.00557585	0.00261989	0.00356519	0.00198069	0.001999	0	0.000411516	0.0110334	0.000808904	0.0260858	0	0
k__Bacteria; p__Actinobacteria; c__Coriobacteriia; o__Coriobacteriales; f__Coriobacteriaceae; g__; s__	77	0.0010873	#NUM!	0	0.0455821	0	0.0516208	0	0	0	0	0	0	0	0	0	0	0	0	0	0	0.174296	0.0167275	0.0366785	0	0.01436	0.0592202	0.00527104	0	0.0242735	0.0544662	0.0163036	0.0711424	0.119829
k__Bacteria; p__Actinobacteria; c__Coriobacteriia; o__Coriobacteriales; f__Coriobacteriaceae; g__; s__	78	0.0787326	2.53932	0.0292943	0.00503931	0.0286373	0.00364846	0	0.0787884	0.0216144	0.00180578	0.00171836	0.0196108	0.00147484	0.00505699	0.0540222	0.0740227	0.048951	0.0108487	0.0605848	0.0316213	0.00262099	0.0111517	0.00654973	0.00713038	0.00817036	0.00124937	0.00155031	0.00576122	0.00441335	0.00269635	0.0114125	0.00156932	0.00123535
k__Bacteria; p__Actinobacteria; c__Coriobacteriia; o__Coriobacteriales; f__Coriobacteriaceae; g__; s__	79	0.661359	0.228289	0.00123678	0.00105578	0.00235165	0.00238936	0.00387177	0	0.000810541	0	0	0	0	0.000505699	0.000577778	0.00805268	0.0034965	0	0	0	0.00262099	0.00836377	0	0	0	0	0	0	0	0.000269635	0	0	0.00247069
k__Bacteria; p__Actinobacteria; c__Coriobacteriia; o__Coriobacteriales; f__Coriobacteriaceae; g__; s__	80	0.0939245	#DIV/0!	0.00290634	0	0.00555473	0	0.0193588	0	0.00351235	0	0	0.00138104	0.000294968	0	0.00808889	0.00805268	0	0	0	0	0	0	0	0	0	0	0	0	0	0	0	0	0
k__Bacteria; p__Actinobacteria; c__Coriobacteriia; o__Coriobacteriales; f__Coriobacteriaceae; g__; s__	81	0.0308052	2.37846	0.00583993	0.00112311	0.00778452	0.002337	0.0116153	0	0.00189126	0.000722314	0	0.00386691	0	0.0010114	0.00606666	0.0105304	0.0034965	0.0108487	0.0286981	0.00301155	0.00262099	0.00836377	0	0	0.00148552	0.000499749	0	0	0	0	0.00163036	0	0
k__Bacteria; p__Actinobacteria; c__Coriobacteriia; o__Coriobacteriales; f__Coriobacteriaceae; g__; s__	82	0.000514711	-4.54043	0.00393959	0.091676	0.00742013	0.0838388	0.0116153	0.0262628	0	0	0	0.000828624	0	0.0010114	0.00144444	0.000929155	0.0034965	0	0.00956602	0	0.279136	0.0139396	0.096936	0.0843762	0.0762567	0.0602197	0.0483695	0.00123455	0.242735	0.0412541	0.140211	0.0292939	0.0778268
k__Bacteria; p__Actinobacteria; c__Coriobacteriia; o__Coriobacteriales; f__Coriobacteriaceae; g__; s__	83	0.000666541	-5.78463	0.000829664	0.0457349	0.00310432	0.048179	0.0116153	0	0	0	0	0	0	0	0	0	0	0	0	0	0.0891137	0.00836377	0.102176	0.0249563	0.0195593	0.0232383	0.00341067	0	0.0198601	0.0167174	0.0407591	0.157455	0.0889449
k__Bacteria; p__Actinobacteria; c__Coriobacteriia; o__Coriobacteriales; f__Coriobacteriaceae; g__; s__	84	0.00461852	-6.85713	0.000102979	0.0119386	0.000314547	0.010901	0	0	0	0	0	0.000276208	0	0	0	0	0.0011655	0	0	0	0.013105	0	0.0130995	0.0106956	0.0321863	0.0132433	0.000620122	0	0.0132401	0.0062016	0	0.0256322	0.0271776
k__Bacteria; p__Actinobacteria; c__Coriobacteriia; o__Coriobacteriales; f__Coriobacteriaceae; g__; s__	85	0.00502736	4.44309	0.0139947	0.000643367	0.0188856	0.00231969	0.0193588	0	0.00594397	0	0	0.00441933	0.00147484	0.0020228	0.0190667	0.0690672	0.0221445	0.028601	0.0223207	0.00150577	0	0.00836377	0	0	0	0	0	0	0	0	0	0	0
k__Bacteria; p__Actinobacteria; c__Coriobacteriia; o__Coriobacteriales; f__Coriobacteriaceae; g__; s__	86	0.0712928	2.72883	0.00305317	0.000460566	0.00402345	0.00154115	0	0	0.00999668	0.00108347	0	0.00110483	0.000884904	0	0.00462222	0.0105304	0.00699301	0	0	0.00752887	0	0.00557585	0	0	0	0	0	0.000411516	0	0	0	0	0
k__Bacteria; p__Actinobacteria; c__Coriobacteriia; o__Coriobacteriales; f__Coriobacteriaceae; g__; s__	87	0.0145849	-2.7732	0.000307287	0.00210068	0.0005646	0.00272531	0	0	0.00027018	0	0	0.000552416	0	0	0.000577778	0.000929155	0	0.00197248	0	0	0.010484	0	0.00130995	0.00237679	0.00222828	0.00174912	0.00124024	0	0	0.000808904	0.00326073	0.00261553	0.00123535
k__Bacteria; p__Actinobacteria; c__Coriobacteriia; o__Coriobacteriales; f__Coriobacteriaceae; g__; s__	88	0.259014	1.30482	0.00296601	0.00120056	0.00308331	0.00200965	0	0	0.00594397	0	0	0.00248587	0	0	0.00404444	0.00402634	0.00815851	0.00295873	0.00637735	0.00752887	0	0.00557585	0	0.00475359	0.00321863	0.00174912	0.000310061	0	0	0	0	0	0
k__Bacteria; p__Actinobacteria; c__Coriobacteriia; o__Coriobacteriales; f__Coriobacteriaceae; g__; s__	89	0.966777	-0.500071	0.000981338	0.00138789	0.00163329	0.0026242	0	0	0.00189126	0	0.000286393	0.000276208	0	0	0.000866666	0.00123887	0.004662	0	0	0.00451732	0.00786297	0	0.00261989	0	0	0.000249874	0.000310061	0.000823032	0	0	0	0	0.00617673
k__Bacteria; p__Actinobacteria; c__Coriobacteriia; o__Coriobacteriales; f__Coriobacteriaceae; g__; s__	90	0.16748	#DIV/0!	0.000543433	0	0.000896105	0	0	0	0	0	0	0.00110483	0	0	0.000577778	0.00278747	0.0011655	0.00197248	0	0	0	0	0	0	0	0	0	0	0	0	0	0	0
k__Bacteria; p__Actinobacteria; c__Coriobacteriia; o__Coriobacteriales; f__Coriobacteriaceae; g__; s__	91	0.174404	0.914246	0.0237679	0.0126118	0.0220137	0.0112483	0.0116153	0.0262628	0.0121581	0.0025281	0.00286393	0.013258	0.00206477	0.00455129	0.0332222	0.0786685	0.032634	0.028601	0.0542075	0.0301155	0.0275204	0.0167275	0.0275089	0.0166376	0.00123793	0.000249874	0.000930184	0.000823032	0.00441335	0.00404452	0.0195644	0.014647	0.0296483
k__Bacteria; p__Actinobacteria; c__Coriobacteriia; o__Coriobacteriales; f__Coriobacteriaceae; g__; s__	92	0.566815	1.22685	0.00529766	0.00226342	0.00633924	0.0026501	0.0193588	0	0.00513343	0.00108347	0	0.00110483	0	0.000505699	0.00375555	0.0148665	0.013986	0.00197248	0.00637735	0.0060231	0.00786297	0.00557585	0.00130995	0.0011884	0.00272345	0.00124937	0	0.00123455	0	0	0.00652146	0.000523106	0.00123535
k__Bacteria; p__Actinobacteria; c__Coriobacteriia; o__Coriobacteriales; f__Coriobacteriaceae; g__; s__	93	0.786803	#NUM!	0	3.16551e-05	0	0.000114134	0	0	0	0	0	0	0	0	0	0	0	0	0	0	0	0	0	0	0	0	0	0.000411516	0	0	0	0	0
k__Bacteria; p__Actinobacteria; c__Coriobacteriia; o__Coriobacteriales; f__Coriobacteriaceae; g__; s__	94	0.385692	1.05188	0.0132724	0.00640182	0.0121765	0.00561462	0.0309741	0.00875427	0.00729487	0.00144463	0	0.00248587	0.000294968	0.000505699	0.0115556	0.0346885	0.0221445	0.0177524	0.0223207	0.0255982	0.0183469	0.00557585	0.0157194	0.00475359	0.00346621	0.00299849	0.000930184	0.000411516	0.00220668	0.00188744	0.00815182	0.00889279	0.00988277
k__Bacteria; p__Actinobacteria; c__Coriobacteriia; o__Coriobacteriales; f__Coriobacteriaceae; g__; s__	95	0.0289887	2.0317	0.0290784	0.00711159	0.0345618	0.0166095	0.0387177	0.0962969	0.0210741	0.00180578	0	0.0151914	0.000884904	0.0020228	0.0473778	0.11026	0.0151515	0.024656	0.00956602	0.0240924	0.0013105	0.0613343	0.00654973	0.00475359	0	0	0.000310061	0.00329213	0.0110334	0.00053927	0	0.00209242	0.00123535
k__Bacteria; p__Actinobacteria; c__Coriobacteriia; o__Coriobacteriales; f__Coriobacteriaceae; g__; s__	96	0.913955	-3.88513	0.000235124	0.00347407	0.000727155	0.00875156	0	0	0.0027018	0	0	0	0.000589936	0	0	0	0	0	0	0	0	0.0278792	0	0	0	0	0	0.0172837	0	0	0	0	0
k__Bacteria; p__Actinobacteria; c__Coriobacteriia; o__Coriobacteriales; f__Coriobacteriaceae; g__; s__	97	0.31925	1.30161	0.00105728	0.000428911	0.00270541	0.00154646	0	0	0.00162108	0	0	0	0	0	0.000288889	0.0102207	0.0011655	0	0	0.00150577	0	0.00557585	0	0	0	0	0	0	0	0	0	0	0
k__Bacteria; p__Actinobacteria; c__Coriobacteriia; o__Coriobacteriales; f__Coriobacteriaceae; g__; s__	98	0.162808	-1.85316	0.000669343	0.00241828	0.00121031	0.0028918	0.00387177	0	0.000540361	0	0	0.000276208	0	0.000505699	0.000288889	0.000929155	0	0.00295873	0	0	0.00262099	0.00557585	0.00261989	0	0.00618967	0.000749623	0.000310061	0	0	0.00053927	0	0.00418484	0.00864742
k__Bacteria; p__Actinobacteria; c__Coriobacteriia; o__Coriobacteriales; f__Coriobacteriaceae; g__; s__	99	0.0308052	3.17277	0.00580175	0.000643367	0.008836	0.00231969	0.00387177	0	0.00756505	0.000361157	0	0.00138104	0	0	0.0262889	0.0226094	0.013986	0.00197248	0.00318867	0	0	0.00836377	0	0	0	0	0	0	0	0	0	0	0
k__Bacteria; p__Actinobacteria; c__Coriobacteriia; o__Coriobacteriales; f__Coriobacteriaceae; g__; s__	100	0.00840891	6.57762	0.00365491	3.82662e-05	0.00489012	9.34079e-05	0	0	0.00621415	0.000722314	0	0.00138104	0.000294968	0	0.00433333	0.0151762	0.00582751	0.00295873	0.0127547	0.00150577	0	0	0	0	0.000247587	0.000249874	0	0	0	0	0	0	0
k__Bacteria; p__Actinobacteria; c__Coriobacteriia; o__Coriobacteriales; f__Coriobacteriaceae; g__; s__	101	0.879697	0.750379	0.00209238	0.00124381	0.00333343	0.00145825	0	0	0.00189126	0	0.000286393	0.00303829	0	0	0.00462222	0.0114596	0	0.00197248	0	0.0060231	0.00393149	0	0	0.0011884	0.00198069	0.00399799	0	0	0	0.00134817	0.00163036	0.00209242	0
k__Bacteria; p__Actinobacteria; c__Coriobacteriia; o__Coriobacteriales; f__Coriobacteriaceae; g__; s__	102	0.0939245	#DIV/0!	0.00137414	0	0.00254328	0	0	0	0.00378253	0	0	0.000552416	0	0	0.000288889	0.0034069	0.002331	0.00887618	0	0	0	0	0	0	0	0	0	0	0	0	0	0	0
k__Bacteria; p__Actinobacteria; c__Coriobacteriia; o__Coriobacteriales; f__Coriobacteriaceae; g__; s__	103	0.0173895	5.88572	0.00187164	3.16551e-05	0.00240311	0.000114134	0	0.00875427	0.00162108	0	0.000286393	0.00220966	0	0.0025285	0.00404444	0.00123887	0.002331	0	0.00318867	0	0	0	0	0	0	0	0	0.000411516	0	0	0	0	0
k__Bacteria; p__Actinobacteria; c__Coriobacteriia; o__Coriobacteriales; f__Coriobacteriaceae; g__; s__	104	0.0492719	#DIV/0!	0.00269003	0	0.00461631	0	0	0	0.00567379	0	0	0.00276208	0.000294968	0	0.00404444	0.0170345	0.004662	0	0.00318867	0	0	0	0	0	0	0	0	0	0	0	0	0	0
k__Bacteria; p__Actinobacteria; c__Coriobacteriia; o__Coriobacteriales; f__Coriobacteriaceae; g__; s__	105	0.0939245	#DIV/0!	0.000780815	0	0.00131355	0	0	0	0.00027018	0	0	0.00303829	0.000589936	0	0.000577778	0	0.0034965	0.00295873	0	0	0	0	0	0	0	0	0	0	0	0	0	0	0
k__Bacteria; p__Actinobacteria; c__Coriobacteriia; o__Coriobacteriales; f__Coriobacteriaceae; g__; s__	106	0.135107	#NUM!	0	0.0010282	0	0.00183808	0	0	0	0	0	0	0	0	0	0	0	0	0	0	0	0	0.00261989	0	0.00074276	0.00274862	0	0	0	0.00107854	0	0	0.00617673
k__Bacteria; p__Actinobacteria; c__Coriobacteriia; o__Coriobacteriales; f__Coriobacteriaceae; g__; s__	107	0.365528	-0.359925	0.00093795	0.00120373	0.00198801	0.00148015	0	0	0.00324217	0	0	0.00165725	0	0	0	0.00123887	0.00699301	0	0	0	0	0	0.00392984	0	0.00074276	0.000999498	0.00155031	0.00452667	0	0.00161781	0	0.00104621	0.00123535
k__Bacteria; p__Actinobacteria; c__Coriobacteriia; o__Coriobacteriales; f__Coriobacteriaceae; g__; s__	108	0.174404	2.34866	0.00110211	0.000216375	0.00132699	0.000413171	0	0	0	0	0	0.000552416	0.00235974	0	0.00231111	0.00154859	0.0034965	0.00197248	0.00318867	0	0	0	0	0	0.000990347	0.000999498	0	0.000823032	0	0	0	0	0
k__Bacteria; p__Actinobacteria; c__Coriobacteriia; o__Coriobacteriales; f__Coriobacteriaceae; g__; s__	109	0.00327621	-6.99611	1.97291e-05	0.00251853	7.38197e-05	0.00220131	0	0	0	0	0	0.000276208	0	0	0	0	0	0	0	0	0.0013105	0	0.00392984	0.00237679	0.00643725	0.00224887	0	0	0.00441335	0.00107854	0.00163036	0.00313863	0.00617673
k__Bacteria; p__Actinobacteria; c__Coriobacteriia; o__Coriobacteriales; f__Coriobacteriaceae; g__; s__	110	0.34072	0.0238408	0.000464692	0.000457076	0.000979458	0.00164801	0	0	0.000810541	0.000361157	0	0	0	0	0.000288889	0.00154859	0.0034965	0	0	0	0	0	0	0.00594198	0	0	0	0	0	0	0	0	0
k__Bacteria; p__Actinobacteria; c__Coriobacteriia; o__Coriobacteriales; f__Coriobacteriaceae; g__; s__	111	0.661359	0.850886	0.00100834	0.000559068	0.0024515	0.00145799	0	0.00875427	0.0013509	0	0	0	0.000294968	0	0	0.00371662	0	0	0	0	0	0	0	0.00237679	0	0	0	0	0	0	0.00489109	0	0
k__Bacteria; p__Actinobacteria; c__Coriobacteriia; o__Coriobacteriales; f__Coriobacteriaceae; g__; s__	112	0.051879	-6.59648	7.04459e-05	0.00681703	0.000263584	0.0122142	0	0	0	0	0	0	0	0	0	0	0	0.000986242	0	0	0.0013105	0	0.00392984	0	0.00198069	0.000249874	0	0	0	0.0361311	0	0.0277246	0.0172948
k__Bacteria; p__Actinobacteria; c__Coriobacteriia; o__Coriobacteriales; f__Coriobacteriaceae; g__; s__	113	0.566815	0.0145569	0.000403711	0.000399658	0.000632017	0.00105247	0	0	0.000810541	0	0	0.000552416	0	0	0.00144444	0.00185831	0	0.000986242	0	0	0	0	0	0.00356519	0	0	0	0	0	0	0.00163036	0	0
k__Bacteria; p__Actinobacteria; c__Coriobacteriia; o__Coriobacteriales; f__Coriobacteriaceae; g__; s__	114	0.00327621	2.77004	0.0119188	0.0017473	0.00989386	0.00617738	0.0154871	0.0175085	0.0102669	0.000361157	0.000286393	0.00276208	0.000294968	0	0.0210889	0.0303524	0.0104895	0.0177524	0.019132	0.0210808	0	0.0223034	0	0	0	0	0	0.000411516	0	0	0	0	0
k__Bacteria; p__Actinobacteria; c__Coriobacteriia; o__Coriobacteriales; f__Coriobacteriaceae; g__; s__	115	0.011125	#DIV/0!	0.00193419	0	0.00241717	0	0	0	0.0013509	0	0	0.00138104	0	0.000505699	0.00202222	0.0034069	0.00582751	0.00788994	0.00318867	0.00150577	0	0	0	0	0	0	0	0	0	0	0	0	0
k__Bacteria; p__Actinobacteria; c__Coriobacteriia; o__Coriobacteriales; f__Coriobacteriaceae; g__; s__	116	0.00502736	#DIV/0!	0.00379386	0	0.00577302	0	0	0.0175085	0.0027018	0	0.000286393	0.000552416	0	0.0010114	0.00491111	0.0161054	0.002331	0	0.00318867	0.00451732	0	0	0	0	0	0	0	0	0	0	0	0	0
k__Bacteria; p__Actinobacteria; c__Coriobacteriia; o__Coriobacteriales; f__Coriobacteriaceae; g__; s__	117	0.259014	2.82022	0.00187049	0.00026484	0.00321584	0.000743269	0.00774353	0	0.000540361	0	0	0	0	0	0.000577778	0.00309718	0.004662	0	0.00956602	0	0	0	0.00261989	0	0	0	0	0.000823032	0	0	0	0	0
k__Bacteria; p__Actinobacteria; c__Coriobacteriia; o__Coriobacteriales; f__Coriobacteriaceae; g__; s__	118	0.259014	3.27467	0.000372035	3.84422e-05	0.000846967	0.000138605	0	0	0.00027018	0	0	0.000552416	0	0	0.000577778	0.000619437	0	0	0.00318867	0	0	0	0	0	0	0.000499749	0	0	0	0	0	0	0
k__Bacteria; p__Actinobacteria; c__Coriobacteriia; o__Coriobacteriales; f__Coriobacteriaceae; g__; s__	119	0.0492719	#DIV/0!	0.000531803	0	0.00105849	0	0	0	0.00027018	0.000361157	0	0.00110483	0	0	0.000288889	0.000309718	0.0011655	0.00394497	0	0	0	0	0	0	0	0	0	0	0	0	0	0	0
k__Bacteria; p__Actinobacteria; c__Coriobacteriia; o__Coriobacteriales; f__Coriobacteriaceae; g__; s__	120	0.0153234	#NUM!	0	0.00112371	0	0.00181962	0	0	0	0	0	0	0	0	0	0	0	0	0	0	0.00655248	0.00278792	0.00130995	0.0011884	0.000495173	0.000499749	0	0	0	0.00053927	0	0	0.00123535
k__Bacteria; p__Actinobacteria; c__Coriobacteriia; o__Coriobacteriales; f__Coriobacteriaceae; g__; s__	121	0.422404	#DIV/0!	0.000383836	0	0.00104216	0	0.00387177	0	0	0	0.000572785	0	0	0	0	0.000929155	0	0	0	0	0	0	0	0	0	0	0	0	0	0	0	0	0
k__Bacteria; p__Actinobacteria; c__Coriobacteriia; o__Coriobacteriales; f__Coriobacteriaceae; g__; s__	122	0.0614995	1.69377	0.00354946	0.0010972	0.00369043	0.00189331	0.0116153	0.00875427	0.00378253	0	0	0.000552416	0.000589936	0.000505699	0.00317778	0.00712352	0.004662	0.00591745	0	0.00301155	0.0013105	0.00278792	0	0.00594198	0.000247587	0	0	0	0	0.000269635	0	0	0.00370604
k__Bacteria; p__Actinobacteria; c__Coriobacteriia; o__Coriobacteriales; f__Coriobacteriaceae; g__; s__	123	0.14192	3.52331	0.00138009	0.000120028	0.00302938	0.000364297	0.0116153	0	0.00162108	0	0	0.000552416	0	0	0.00115556	0.00123887	0.0011655	0.00197248	0	0	0.0013105	0	0	0	0	0.000249874	0	0	0	0	0	0	0
k__Bacteria; p__Actinobacteria; c__Coriobacteriia; o__Coriobacteriales; f__Coriobacteriaceae; g__; s__	124	0.135107	#NUM!	0	0.00027713	0	0.000470001	0	0	0	0	0	0	0	0	0	0	0	0	0	0	0	0	0.00130995	0	0.000247587	0.000499749	0.000310061	0	0	0	0	0	0.00123535
k__Bacteria; p__Actinobacteria; c__Coriobacteriia; o__Coriobacteriales; f__Coriobacteriaceae; g__; s__	125	0.2764	#DIV/0!	0.0036427	0	0.00741814	0	0.00387177	0	0	0	0	0	0	0	0.00606666	0	0	0.0187386	0.0223207	0	0	0	0	0	0	0	0	0	0	0	0	0	0
k__Bacteria; p__Actinobacteria; c__Coriobacteriia; o__Coriobacteriales; f__Coriobacteriaceae; g__; s__	126	0.34072	1.36638	0.00259861	0.00100791	0.00428877	0.00153857	0	0	0.00297198	0	0	0.000276208	0.000294968	0.000505699	0.00173333	0.0145568	0.00815851	0	0.00637735	0.00150577	0.00262099	0.00278792	0.00130995	0.00475359	0	0	0	0	0	0	0.00163036	0	0
k__Bacteria; p__Actinobacteria; c__Coriobacteriia; o__Coriobacteriales; f__Coriobacteriaceae; g__Adlercreutzia; s__	127	0.520786	-0.544445	0.0021574	0.00314648	0.00226119	0.00584196	0.00387177	0	0.000540361	0	0.000286393	0.00303829	0.00117987	0	0.00635555	0.00557493	0.004662	0	0.00318867	0.00150577	0.010484	0.00557585	0	0.00475359	0	0.000749623	0	0.0193412	0	0	0	0	0
k__Bacteria; p__Actinobacteria; c__Coriobacteriia; o__Coriobacteriales; f__Coriobacteriaceae; g__Adlercreutzia; s__	128	0.0271866	2.12807	0.00850737	0.00194618	0.00897102	0.00276686	0.00774353	0.00875427	0.00675451	0	0.000286393	0.00248587	0.000589936	0.000505699	0.00837777	0.031901	0.020979	0.0138074	0.00637735	0.0105404	0.00786297	0	0.00261989	0.0011884	0	0.000749623	0	0	0.00220668	0	0.00326073	0	0.00741207
k__Bacteria; p__Actinobacteria; c__Coriobacteriia; o__Coriobacteriales; f__Coriobacteriaceae; g__Adlercreutzia; s__	129	0.174404	2.65579	0.00341456	0.00054183	0.00677741	0.000821705	0	0.0262628	0.00243162	0	0.00171836	0.00303829	0.00117987	0	0.00404444	0.00464578	0.0034965	0.000986242	0	0	0	0	0.00261989	0.0011884	0.000495173	0.00174912	0.000310061	0.000411516	0	0.000269635	0	0	0
k__Bacteria; p__Actinobacteria; c__Coriobacteriia; o__Coriobacteriales; f__Coriobacteriaceae; g__Adlercreutzia; s__	130	0.190108	2.39215	0.00112576	0.000214456	0.00211012	0.000773231	0	0	0.000810541	0.000361157	0	0	0	0	0.00144444	0.00464578	0.00699301	0	0	0.00150577	0	0.00278792	0	0	0	0	0	0	0	0	0	0	0
k__Bacteria; p__Actinobacteria; c__Coriobacteriia; o__Coriobacteriales; f__Coriobacteriaceae; g__Atopobium; s__	131	0.0271866	2.35915	0.00476041	0.000927833	0.00548215	0.00204648	0.00774353	0	0.00378253	0	0.000286393	0.00524795	0.000589936	0.00404559	0.00924444	0.00371662	0.018648	0.0118349	0	0.00150577	0	0.00278792	0	0.00713038	0.000247587	0.000249874	0	0.00164606	0	0	0	0	0
k__Bacteria; p__Actinobacteria; c__Coriobacteriia; o__Coriobacteriales; f__Coriobacteriaceae; g__Atopobium; s__	132	0.0712928	#NUM!	0	0.000454404	0	0.000762675	0	0	0	0	0	0	0	0	0	0	0	0	0	0	0	0	0	0	0.00247587	0.000499749	0.000620122	0.000411516	0	0.000269635	0.00163036	0	0
k__Bacteria; p__Actinobacteria; c__Coriobacteriia; o__Coriobacteriales; f__Coriobacteriaceae; g__Atopobium; s__	133	0.00403061	4.30452	0.00414496	0.000209764	0.00360441	0.000414902	0.00387177	0	0.00216144	0	0.00171836	0.00718141	0	0.0025285	0.00693333	0.0114596	0.00699301	0.00295873	0.00318867	0.00903465	0	0	0	0	0.00074276	0.000749623	0	0.00123455	0	0	0	0	0
k__Bacteria; p__Actinobacteria; c__Coriobacteriia; o__Coriobacteriales; f__Coriobacteriaceae; g__Atopobium; s__	134	0.746609	-2.72515	0.000149059	0.000985624	0.000354159	0.00246479	0	0	0.00027018	0	0	0	0	0	0.000577778	0.00123887	0	0	0	0	0	0.00836377	0.00392984	0	0	0.000249874	0	0	0	0.000269635	0	0	0
k__Bacteria; p__Actinobacteria; c__Coriobacteriia; o__Coriobacteriales; f__Coriobacteriaceae; g__Atopobium; s__	135	0.000514711	#DIV/0!	0.00472924	0	0.0070104	0	0	0.0262628	0.00324217	0.00108347	0.000286393	0.0035907	0.000589936	0.0010114	0.000866666	0.00154859	0.004662	0.00295873	0.00956602	0.0105404	0	0	0	0	0	0	0	0	0	0	0	0	0
k__Bacteria; p__Actinobacteria; c__Coriobacteriia; o__Coriobacteriales; f__Coriobacteriaceae; g__Slackia; s__	136	0.239594	#NUM!	0	0.000216908	0	0.00043014	0	0	0	0	0	0	0	0	0	0	0	0	0	0	0	0	0.00130995	0	0.000990347	0.000249874	0	0	0	0.000269635	0	0	0
k__Bacteria; p__Armatimonadetes; c__SJA-176; o__RB046; f__; g__; s__	137	0.011125	#DIV/0!	0.00446292	0	0.00645779	0	0	0	0.000540361	0.00577851	0	0.00414312	0.00973394	0.00707979	0.00288889	0.00526521	0	0.00295873	0	0.0240924	0	0	0	0	0	0	0	0	0	0	0	0	0
k__Bacteria; p__Armatimonadetes; c__SJA-176; o__RB046; f__; g__; s__	138	0.010264	1.82468	0.0082754	0.00233618	0.00523113	0.0045615	0.00774353	0	0.00216144	0.00866776	0.014606	0.00801003	0.0156333	0.0156767	0.00982222	0.00402634	0.0128205	0.00295873	0.00318867	0.0105404	0	0.00557585	0	0.00356519	0	0.000249874	0	0.0024691	0.00220668	0	0.0163036	0	0
k__Bacteria; p__Armatimonadetes; c__SJA-176; o__RB046; f__; g__; s__	139	0.00502736	#DIV/0!	0.0024603	0	0.00286686	0	0	0	0.000540361	0.000361157	0.00343671	0.00939107	0.00265471	0.0020228	0.00548889	0.00619437	0.0011655	0	0.00318867	0	0	0	0	0	0	0	0	0	0	0	0	0	0
k__Bacteria; p__Bacteroidetes; c__Bacteroidia; o__Bacteroidales	140	0.0939245	#DIV/0!	0.00205794	0	0.00411374	0	0	0.00875427	0	0	0	0	0.00176981	0.0020228	0.000288889	0.00216803	0	0.0138074	0	0	0	0	0	0	0	0	0	0	0	0	0	0	0
k__Bacteria; p__Bacteroidetes; c__Bacteroidia; o__Bacteroidales; f__; g__; s__	141	0.00139711	5.09335	0.0302588	0.000886342	0.0255051	0.00319575	0	0.0175085	0.00837559	0.0487562	0.0120285	0.0220966	0.0262521	0.0510756	0.0294667	0.0526521	0.00932401	0.0828443	0	0.0632425	0	0	0	0	0	0	0	0.0115224	0	0	0	0	0
k__Bacteria; p__Bacteroidetes; c__Bacteroidia; o__Bacteroidales; f__; g__; s__	142	0.661359	-0.601127	0.00307287	0.00466124	0.0031352	0.00737317	0	0	0.00729487	0	0.000286393	0.00856245	0.00117987	0.00606839	0.00404444	0.00247775	0.0011655	0.00591745	0	0.0060231	0.00393149	0	0.00392984	0.0142608	0	0	0.00248049	0.0131685	0	0	0.0228251	0	0
k__Bacteria; p__Bacteroidetes; c__Bacteroidia; o__Bacteroidales; f__; g__; s__	143	0.00647832	3.97	0.0742229	0.00473641	0.107654	0.0107407	0.336844	0	0.00405271	0.0166132	0.00429589	0.0367357	0.00678426	0.0945658	0.290911	0.0727838	0	0.0788994	0.0860942	0.0105404	0	0.0195155	0	0.00237679	0	0.00224887	0	0.0358019	0	0	0.00163036	0	0
k__Bacteria; p__Bacteroidetes; c__Bacteroidia; o__Bacteroidales; f__; g__; s__	144	0.00047227	4.7504	0.0806511	0.00299639	0.0672389	0.00382776	0.00774353	0.192594	0.0108072	0.0418942	0.014606	0.034526	0.0468999	0.0581554	0.0644222	0.18676	0.185315	0.0956655	0.0542075	0.13552	0.00917347	0.00278792	0	0.00475359	0.00074276	0.0109945	0.000310061	0.000823032	0	0.000808904	0	0.00732348	0.00123535
k__Bacteria; p__Bacteroidetes; c__Bacteroidia; o__Bacteroidales; f__; g__; s__	145	0.000551991	4.05267	0.0375192	0.00226087	0.0418361	0.00770106	0.0348459	0.0437713	0.0108072	0.0249198	0.00859178	0.151914	0.0300867	0.0121368	0.0869555	0.0102207	0.013986	0.0108487	0.00637735	0.0798061	0	0.0278792	0	0	0.00074276	0.000499749	0	0	0	0.000269635	0	0	0
k__Bacteria; p__Bacteroidetes; c__Bacteroidia; o__Bacteroidales; f__; g__; s__	146	0.000967903	#DIV/0!	0.00990581	0	0.0126254	0	0	0	0.00243162	0.000361157	0.000859178	0.00193346	0.00530942	0.0015171	0.0150222	0.0213706	0.002331	0.0394497	0.0255094	0.0225866	0	0	0	0	0	0	0	0	0	0	0	0	0
k__Bacteria; p__Bacteroidetes; c__Bacteroidia; o__Bacteroidales; f__; g__; s__	147	0.011125	#DIV/0!	0.0265284	0	0.0878064	0	0	0	0	0.000361157	0.000572785	0.331173	0.00471949	0.0020228	0.00924444	0.00619437	0.0011655	0	0.0159434	0	0	0	0	0	0	0	0	0	0	0	0	0	0
k__Bacteria; p__Bacteroidetes; c__Bacteroidia; o__Bacteroidales; f__; g__; s__	148	0.000622117	3.70156	0.0167405	0.00128673	0.0103049	0.00463938	0.0154871	0.0262628	0.0110774	0.00325041	0.0426725	0.0162963	0.0244823	0.0126425	0.0245555	0.0123887	0.018648	0.00986242	0.00318867	0.013552	0	0.0167275	0	0	0	0	0	0	0	0	0	0	0
k__Bacteria; p__Bacteroidetes; c__Bacteroidia; o__Bacteroidales; f__; g__; s__	149	0.249954	0.639476	0.00377887	0.00242583	0.00723532	0.00619459	0.00774353	0	0.0013509	0.000361157	0.0257753	0.00110483	0.00117987	0.0010114	0	0	0.002331	0	0	0.0120462	0	0.0223034	0.00392984	0	0	0	0	0.000411516	0	0	0.00489109	0	0
k__Bacteria; p__Bacteroidetes; c__Bacteroidia; o__Bacteroidales; f__; g__; s__	150	0.00105731	6.08199	0.0730142	0.00107782	0.0884975	0.00216466	0.0890506	0	0.00459307	0.000722314	0.268636	0.178154	0.0109138	0.0374217	0.0254222	0.0266358	0.018648	0.226836	0.0478301	0.0873349	0	0	0	0	0.00198069	0.00724636	0	0	0	0.00107854	0	0	0.00370604
k__Bacteria; p__Bacteroidetes; c__Bacteroidia; o__Bacteroidales; f__; g__; s__	151	0.000497244	3.96262	0.0475235	0.00304819	0.0262491	0.00693818	0.050333	0.0175085	0.0118879	0.0213083	0.032076	0.0825862	0.0421804	0.0500642	0.0673111	0.106543	0.0501166	0.0236698	0.0510188	0.0587252	0	0.0250913	0	0	0.000990347	0.00524736	0	0.00617274	0	0.00107854	0	0.00104621	0
k__Bacteria; p__Bacteroidetes; c__Bacteroidia; o__Bacteroidales; f__; g__; s__	152	0.000514711	#DIV/0!	0.0756048	0	0.105889	0	0.0154871	0.00875427	0.00162108	0.066814	0.0111693	0.0375643	0.036871	0.126931	0.253933	0.359273	0.0174825	0.0788994	0	0.0436675	0	0	0	0	0	0	0	0	0	0	0	0	0
k__Bacteria; p__Bacteroidetes; c__Bacteroidia; o__Bacteroidales; f__; g__; s__	153	0.00187704	-6.54584	0.000849394	0.0793603	0.00309952	0.0809729	0.0116153	0	0	0	0	0.000276208	0	0	0	0	0	0	0	0	0.0838717	0	0.107416	0.123593	0.0829415	0.0809593	0.00589116	0	0.0110334	0.0417934	0.0472806	0.155362	0.291542
k__Bacteria; p__Bacteroidetes; c__Bacteroidia; o__Bacteroidales; f__; g__; s__	154	0.600367	-1.2802	0.000492588	0.00119636	0.000615721	0.00253386	0	0	0.00027018	0.000361157	0	0	0.000294968	0.000505699	0.00173333	0.00123887	0	0.000986242	0	0.00150577	0.00655248	0	0.00130995	0.00713038	0	0.000249874	0.000310061	0	0	0	0	0	0
k__Bacteria; p__Bacteroidetes; c__Bacteroidia; o__Bacteroidales; f__; g__; s__	155	0.000967903	#DIV/0!	0.0155951	0	0.01893	0	0	0	0.0264777	0.000361157	0.00229114	0.00966728	0.00206477	0.0232622	0.0609555	0.0173442	0.00932401	0.0493121	0.0127547	0.00451732	0	0	0	0	0	0	0	0	0	0	0	0	0
k__Bacteria; p__Bacteroidetes; c__Bacteroidia; o__Bacteroidales; f__; g__; s__	156	0.463699	3.56695	0.014653	0.00123643	0.0301676	0.00175908	0	0	0	0.000361157	0.00143196	0.00220966	0	0.0293306	0.0534444	0.104995	0.00699301	0	0.00637735	0	0	0	0	0.00594198	0	0	0.00124024	0.00164606	0.00220668	0.000269635	0.00163036	0.00313863	0
k__Bacteria; p__Bacteroidetes; c__Bacteroidia; o__Bacteroidales; f__; g__; s__	157	0.0787326	-0.926257	0.00283648	0.00539028	0.00365072	0.00424738	0	0	0.0129687	0.00144463	0.0040095	0.00220966	0.000589936	0	0.00317778	0.00216803	0.00815851	0.00197248	0	0.00301155	0.013105	0.00278792	0	0.00594198	0.00321863	0.00324837	0.000620122	0.00617274	0.00662003	0.0137514	0.00163036	0.00680037	0.00617673
k__Bacteria; p__Bacteroidetes; c__Bacteroidia; o__Bacteroidales; f__; g__; s__	158	0.000458554	8.46459	0.0366352	0.000103706	0.0318827	0.000373916	0.0116153	0.00875427	0.00648433	0.0144463	0.030644	0.0662899	0.0159283	0.0692808	0.120178	0.0108401	0.0407925	0.0522708	0.0382641	0.0271039	0	0	0	0	0	0	0	0	0	0.00134817	0	0	0
k__Bacteria; p__Bacteroidetes; c__Bacteroidia; o__Bacteroidales; f__; g__; s__	159	0.000514711	11.1358	0.0466703	2.07411e-05	0.0482695	7.47832e-05	0.135512	0.113805	0.00729487	0.00830661	0.0392358	0.0502699	0.0103239	0.0364103	0.0176222	0.0557493	0.0198135	0.0187386	0.140302	0	0	0	0	0	0	0	0	0	0	0.000269635	0	0	0
k__Bacteria; p__Bacteroidetes; c__Bacteroidia; o__Bacteroidales; f__; g__; s__	160	0.00221618	#DIV/0!	0.0119175	0	0.0293579	0	0.0154871	0	0.00027018	0.00613967	0.00143196	0.00220966	0.0135685	0.0015171	0.112378	0.00247775	0.002331	0	0	0.00903465	0	0	0	0	0	0	0	0	0	0	0	0	0
k__Bacteria; p__Bacteroidetes; c__Bacteroidia; o__Bacteroidales; f__; g__; s__	161	0.000497244	4.65582	0.0465874	0.00184811	0.0366912	0.00615715	0.104538	0.0875427	0.00945632	0.00975124	0.00744621	0.0740237	0.0250723	0.025285	0.0652889	0.116144	0.04662	0.0374772	0.0255094	0.0180693	0.0013105	0.0223034	0	0	0	0	0	0.000411516	0	0	0	0	0
k__Bacteria; p__Bacteroidetes; c__Bacteroidia; o__Bacteroidales; f__; g__; s__	162	0.000898693	-6.98612	0.00444541	0.563563	0.00709176	1.00675	0.00774353	0.0262628	0	0.000361157	0.000572785	0.00248587	0.000294968	0.00606839	0.00664444	0.00247775	0.00932401	0	0	0	3.51344	0.131032	0.884214	0.00950717	0.0747712	0.519489	0.144178	0.00329213	0.189774	0.173645	0.0114125	0.00261553	1.66895
k__Bacteria; p__Bacteroidetes; c__Bacteroidia; o__Bacteroidales; f__; g__; s__	163	0.00123317	2.74844	0.0281172	0.00418416	0.0184451	0.0123162	0.0309741	0.0175085	0.00351235	0.0050562	0.00687342	0.0295543	0.0206477	0.0353989	0.0358222	0.0272552	0.0524476	0.0276148	0.0286981	0.0722772	0	0.0446068	0	0	0	0.000749623	0	0.00740729	0	0	0.00163036	0	0
k__Bacteria; p__Bacteroidetes; c__Bacteroidia; o__Bacteroidales; f__; g__; s__	164	0.0939245	#DIV/0!	0.000834171	0	0.00184504	0	0	0	0.00108072	0.00144463	0	0	0.000884904	0	0.000288889	0	0.00699301	0.000986242	0	0	0	0	0	0	0	0	0	0	0	0	0	0	0
k__Bacteria; p__Bacteroidetes; c__Bacteroidia; o__Bacteroidales; f__; g__; s__	165	0.00840891	5.28875	0.00618706	0.000158275	0.00685654	0.00057067	0.0232306	0	0.00918614	0.0144463	0.000572785	0.00635278	0.00707923	0.00657409	0.00837777	0.000309718	0.0104895	0	0	0	0	0	0	0	0	0	0	0.00205758	0	0	0	0	0
k__Bacteria; p__Bacteroidetes; c__Bacteroidia; o__Bacteroidales; f__; g__; s__	166	0.00500373	5.08521	0.00350359	0.000103208	0.00346146	0.000273269	0.00387177	0.00875427	0.00027018	0.000722314	0.00429589	0	0	0.0025285	0.00664444	0.00154859	0.0034965	0	0.00637735	0.0105404	0	0	0	0	0	0	0.000930184	0.000411516	0	0	0	0	0
k__Bacteria; p__Bacteroidetes; c__Bacteroidia; o__Bacteroidales; f__; g__; s__	167	0.463699	0.328563	0.00820755	0.00653591	0.01046	0.0131717	0	0	0.00540361	0.00108347	0.00286393	0.00552416	0.00265471	0	0.00664444	0.0139373	0.0291375	0.0295873	0	0.0180693	0.013105	0.0473947	0	0	0.000495173	0.00124937	0	0.0131685	0	0.00053927	0.00326073	0.00575416	0
k__Bacteria; p__Bacteroidetes; c__Bacteroidia; o__Bacteroidales; f__; g__; s__	168	0.0240997	#DIV/0!	0.00273503	0	0.00350319	0	0.00774353	0	0	0	0.000572785	0.00165725	0.00412955	0.00910259	0.00635555	0.00774296	0	0.000986242	0	0	0	0	0	0	0	0	0	0	0	0	0	0	0
k__Bacteria; p__Bacteroidetes; c__Bacteroidia; o__Bacteroidales; f__; g__; s__	169	0.00123317	-3.9563	0.00294625	0.0457337	0.00819629	0.0435392	0.0309741	0	0.00513343	0	0	0.00138104	0.000294968	0	0	0.00247775	0	0.000986242	0	0	0.0917347	0.00836377	0.0432282	0.146173	0.0123793	0.0694651	0.0164332	0.0444437	0	0.00889795	0.0961915	0.0251091	0.032119
k__Bacteria; p__Bacteroidetes; c__Bacteroidia; o__Bacteroidales; f__; g__; s__	170	0.977175	-1.01971	0.0169313	0.0343284	0.0129012	0.0485669	0.0271024	0	0.046471	0.00902892	0.0217658	0.00939107	0.018288	0.00657409	0.0173333	0.0167248	0.037296	0.00394497	0.00956602	0.013552	0.00655248	0.0613343	0.00916962	0.0855645	0.00792277	0.011994	0.00806159	0.00905335	0.00220668	0.0102461	0.0472806	0.0151701	0.171713
k__Bacteria; p__Bacteroidetes; c__Bacteroidia; o__Bacteroidales; f__; g__; s__	171	0.00502736	#DIV/0!	0.00528025	0	0.00696459	0	0	0.00875427	0.000540361	0.000722314	0.0191883	0.00607658	0	0	0.00751111	0.00278747	0.002331	0.00493121	0	0.0210808	0	0	0	0	0	0	0	0	0	0	0	0	0
k__Bacteria; p__Bacteroidetes; c__Bacteroidia; o__Bacteroidales; f__; g__; s__	172	0.0010873	8.28659	0.039161	0.000125413	0.0684905	0.000452182	0.0696918	0	0.0191828	0.0711479	0.024057	0.021268	0.00235974	0.00960829	0.263467	0.0034069	0.020979	0.032546	0	0.0105404	0	0	0	0	0	0	0	0	0	0	0.00163036	0	0
k__Bacteria; p__Bacteroidetes; c__Bacteroidia; o__Bacteroidales; f__; g__; s__	173	0.0240997	-0.439752	0.0279852	0.0379584	0.0170806	0.103963	0.0154871	0.0175085	0.013509	0.00939008	0.01747	0.0336974	0.0536841	0.0283192	0.0407333	0.0424314	0.0268065	0.00887618	0.019132	0.0647483	0.381354	0.0390309	0.00523979	0.0320867	0.00123793	0.000499749	0.000620122	0.0181067	0.00662003	0.00161781	0.00652146	0.000523106	0
k__Bacteria; p__Bacteroidetes; c__Bacteroidia; o__Bacteroidales; f__; g__; s__	174	0.0341146	#NUM!	0	0.00681679	0	0.0183068	0	0	0	0	0	0	0	0	0	0	0	0	0	0	0.0668353	0	0.00130995	0	0.000247587	0.00399799	0.0040308	0	0	0.00107854	0	0	0.0111181
k__Bacteria; p__Bacteroidetes; c__Bacteroidia; o__Bacteroidales; f__; g__; s__	175	0.259014	0.482853	0.00250961	0.00179578	0.00431869	0.00401043	0	0	0.0013509	0.000361157	0.00544146	0.000276208	0.00117987	0.000505699	0.000577778	0.00805268	0.002331	0	0	0.0150577	0.0144155	0	0	0.00237679	0	0	0	0.00329213	0	0	0.00326073	0	0
k__Bacteria; p__Bacteroidetes; c__Bacteroidia; o__Bacteroidales; f__; g__; s__	176	0.000622117	5.11436	0.0328958	0.000949652	0.0244883	0.00342402	0.00387177	0	0.00378253	0.0140851	0.0360855	0.0682234	0.027137	0.0713036	0.0557555	0.0492452	0.0198135	0.0502983	0.0127547	0.0481848	0	0	0	0	0	0	0	0.0123455	0	0	0	0	0
k__Bacteria; p__Bacteroidetes; c__Bacteroidia; o__Bacteroidales; f__; g__; s__	177	0.00123317	3.50755	0.0455231	0.00400271	0.0538079	0.011337	0.0696918	0.0962969	0.00783523	0.000361157	0.0206203	0.0646327	0.00589936	0.0015171	0.0947555	0.192645	0.0221445	0.0207111	0.019132	0.0210808	0	0	0	0	0.0410994	0.00724636	0	0.00288061	0	0.000808904	0	0	0
k__Bacteria; p__Bacteroidetes; c__Bacteroidia; o__Bacteroidales; f__; g__; s__	178	0.010871	1.78344	0.0210822	0.00612418	0.028702	0.016785	0.00774353	0	0.0259373	0.0122793	0.0137468	0.0140866	0.0808212	0.0920373	0.0078	0.00247775	0.0174825	0.000986242	0.00318867	0.0165635	0	0.0613343	0.00392984	0.0011884	0.00222828	0.000249874	0	0.00905335	0	0	0.00163036	0	0
k__Bacteria; p__Bacteroidetes; c__Bacteroidia; o__Bacteroidales; f__; g__; s__	179	0.00123317	7.26598	0.0162171	0.000105365	0.0161463	0.000258548	0	0	0.00837559	0.00144463	0.0126013	0.041155	0.0265471	0.0176995	0.0147333	0.0145568	0.0524476	0.000986242	0.00637735	0.0301155	0	0	0	0	0	0.000749623	0.000620122	0	0	0	0	0	0
k__Bacteria; p__Bacteroidetes; c__Bacteroidia; o__Bacteroidales; f__; g__; s__	180	0.308192	-1.15578	0.0014772	0.00329127	0.00243993	0.00817451	0	0	0.00027018	0.00180578	0.00572785	0.00303829	0.000589936	0	0	0.00774296	0	0	0	0.00150577	0	0.0250913	0	0	0	0	0	0.0176952	0	0	0	0	0
k__Bacteria; p__Bacteroidetes; c__Bacteroidia; o__Bacteroidales; f__; g__; s__	181	0.000458554	8.55107	0.0501373	0.00013367	0.0310291	0.000345165	0.0580765	0.0262628	0.00162108	0.0195025	0.0171836	0.0784431	0.0495546	0.115299	0.0829111	0.0625631	0.0687646	0.032546	0.0605848	0.0286097	0	0	0	0	0.000247587	0.000249874	0.00124024	0	0	0	0	0	0
k__Bacteria; p__Bacteroidetes; c__Bacteroidia; o__Bacteroidales; f__; g__; s__	182	0.000514711	#DIV/0!	0.00917151	0	0.00755097	0	0.00774353	0	0.000810541	0.0223917	0.000572785	0.00248587	0.0215327	0.0136539	0.0132889	0.00433606	0.0034965	0.0147936	0.0127547	0.0105404	0	0	0	0	0	0	0	0	0	0	0	0	0
k__Bacteria; p__Bacteroidetes; c__Bacteroidia; o__Bacteroidales; f__; g__; s__	183	0.0010873	2.38198	0.107259	0.0205772	0.0597311	0.0506584	0.0890506	0.0612799	0.0445798	0.0812603	0.0601425	0.153019	0.0259572	0.110242	0.152533	0.195432	0.138695	0.0266285	0.188132	0.17467	0.0314519	0.186791	0.00654973	0	0.00420897	0.00524736	0.000620122	0.00123455	0.0110334	0.00350525	0.00326073	0.0136007	0
k__Bacteria; p__Bacteroidetes; c__Bacteroidia; o__Bacteroidales; f__; g__; s__	184	0.0020408	2.43203	0.00977098	0.00181061	0.0103339	0.00616676	0.0348459	0.0175085	0.00432289	0.00830661	0.00200475	0.00165725	0.0073742	0.0015171	0.00462222	0.0207511	0.00932401	0.00197248	0	0.0225866	0	0.0223034	0	0	0	0	0	0.00123455	0	0	0	0	0
k__Bacteria; p__Bacteroidetes; c__Bacteroidia; o__Bacteroidales; f__; g__; s__	185	0.00123317	9.40971	0.0414756	6.098e-05	0.0669491	0.000157586	0	0.00875427	0.00783523	0.0227529	0.0902137	0.0469554	0.0147484	0.0460186	0.0147333	0.256447	0.0524476	0	0.00318867	0.0165635	0	0	0	0	0	0	0	0	0	0.000269635	0	0.000523106	0
k__Bacteria; p__Bacteroidetes; c__Bacteroidia; o__Bacteroidales; f__; g__; s__	186	0.000458554	3.82586	0.102544	0.00723127	0.0617312	0.0172998	0.247793	0.0700341	0.0534957	0.0451446	0.0589969	0.095568	0.0489647	0.052087	0.0797333	0.127604	0.0745921	0.148923	0.133924	0.198762	0	0.0418188	0	0	0.000247587	0.000499749	0	0.0502049	0	0	0	0	0.00123535
k__Bacteria; p__Bacteroidetes; c__Bacteroidia; o__Bacteroidales; f__; g__; s__	187	0.0289887	1.55351	0.00264562	0.000901308	0.00370665	0.00239099	0	0	0.000810541	0.00108347	0.000859178	0.00110483	0.00235974	0.0020228	0.00491111	0.00247775	0.013986	0.00591745	0	0.00150577	0	0	0	0.00356519	0	0	0	0	0	0	0.00815182	0	0
k__Bacteria; p__Bacteroidetes; c__Bacteroidia; o__Bacteroidales; f__; g__; s__	188	0.632473	-0.811662	0.000389305	0.000683321	0.000777081	0.00116686	0	0	0.00243162	0	0.00171836	0	0	0.0010114	0.000288889	0	0	0	0	0	0	0	0	0	0	0.00299849	0.000310061	0	0	0.00107854	0.00326073	0	0.00123535
k__Bacteria; p__Bacteroidetes; c__Bacteroidia; o__Bacteroidales; f__; g__; s__	189	0.174404	1.04706	0.0206286	0.00998326	0.017025	0.0110377	0	0	0.0380954	0.0126405	0.0223386	0.0151914	0.0262521	0.0237679	0.0537333	0.00309718	0.0454545	0.0256423	0	0.0225866	0	0.0195155	0.00523979	0.0249563	0.000247587	0.00124937	0.00899177	0.0353904	0.00882671	0.000808904	0.0146733	0	0.00988277
k__Bacteria; p__Bacteroidetes; c__Bacteroidia; o__Bacteroidales; f__; g__; s__	190	0.00221618	#DIV/0!	0.00326537	0	0.00490513	0	0	0.0175085	0.000810541	0	0.000572785	0.00276208	0.00117987	0.0015171	0.00375555	0.00154859	0.002331	0	0.00318867	0.0105404	0	0	0	0	0	0	0	0	0	0	0	0	0
k__Bacteria; p__Bacteroidetes; c__Bacteroidia; o__Bacteroidales; f__; g__; s__	191	0.00305382	-5.45185	0.000213132	0.00932865	0.000434184	0.0114997	0	0	0	0	0	0.000276208	0.00117987	0	0.000288889	0.00123887	0	0	0	0	0.0209679	0	0.0117895	0.0142608	0.00074276	0.0242378	0.00217043	0.000411516	0	0.00323562	0.00489109	0.0360943	0.00247069
k__Bacteria; p__Bacteroidetes; c__Bacteroidia; o__Bacteroidales; f__; g__; s__	192	0.43518	-2.42273	0.000405916	0.00217645	0.00122342	0.00367097	0	0	0	0	0	0	0	0	0	0	0.0011655	0	0	0.00451732	0	0.0111517	0	0	0	0	0.00527104	0.00534971	0	0	0.00652146	0	0
k__Bacteria; p__Bacteroidetes; c__Bacteroidia; o__Bacteroidales; f__; g__; s__	193	0.000458554	10.111	0.08671	7.84045e-05	0.0479988	0.000215005	0.108409	0.140068	0.00621415	0.0888446	0.030644	0.061042	0.0359861	0.138056	0.124511	0.148045	0.0862471	0.0502983	0.0510188	0.144554	0	0	0	0	0	0.000749623	0	0	0	0.000269635	0	0	0
k__Bacteria; p__Bacteroidetes; c__Bacteroidia; o__Bacteroidales; f__; g__; s__	194	0.00647832	#NUM!	0	0.0138449	0	0.021096	0	0	0	0	0	0	0	0	0	0	0	0	0	0	0.0209679	0	0	0.0190143	0	0.00174912	0.00496098	0.00288061	0.00220668	0.011055	0.0603235	0	0.0568259
k__Bacteria; p__Bacteroidetes; c__Bacteroidia; o__Bacteroidales; f__; g__; s__	195	0.0787326	0.13348	0.219611	0.200204	0.216752	0.421135	0.278767	0.0350171	0.0969948	0.257866	0.0604288	0.140037	0.0988142	0.0399502	0.431311	0.172513	0.519814	0.0138074	0.165811	0.763428	0.013105	0.323399	0.260679	0.351765	0.0037138	0.00224887	0.00310061	1.53084	0.00220668	0.00296598	0.00652146	0.00575416	0.096357
k__Bacteria; p__Bacteroidetes; c__Bacteroidia; o__Bacteroidales; f__; g__; s__	196	0.103375	-1.29102	0.00340738	0.00833788	0.00386865	0.00751861	0	0	0.00108072	0.000722314	0.00544146	0.0129818	0.00471949	0.00556269	0.00693333	0.00712352	0.0011655	0.00197248	0	0	0.00524198	0	0.0209591	0.00356519	0.00544691	0.0212393	0.00651128	0.00452667	0.0132401	0.00593197	0.00163036	0.00156932	0.0185302
k__Bacteria; p__Bacteroidetes; c__Bacteroidia; o__Bacteroidales; f__; g__; s__	197	0.000514711	#DIV/0!	0.0138865	0	0.0163561	0	0.00387177	0	0.00351235	0.00325041	0.0526962	0.00607658	0.00324465	0.0192166	0.0176222	0.00991099	0.0034965	0.024656	0.00318867	0.0436675	0	0	0	0	0	0	0	0	0	0	0	0	0
k__Bacteria; p__Bacteroidetes; c__Bacteroidia; o__Bacteroidales; f__; g__; s__	198	0.00502736	#DIV/0!	0.00637288	0	0.00846916	0	0	0	0.000540361	0.0241975	0.00257753	0.0171249	0.00176981	0.0010114	0.00837777	0.0204414	0.002331	0.0108487	0	0	0	0	0	0	0	0	0	0	0	0	0	0	0
k__Bacteria; p__Bacteroidetes; c__Bacteroidia; o__Bacteroidales; f__; g__; s__	199	0.0240997	2.73873	0.0115932	0.00173685	0.00967282	0.00254941	0	0	0.00459307	0.0198636	0.00200475	0.0185059	0.0244823	0.0121368	0.0257111	0.02199	0.016317	0.00394497	0.0127547	0	0	0	0.00916962	0.0011884	0.00123793	0.000499749	0.000310061	0	0	0.00188744	0.00163036	0.00418484	0.00247069
k__Bacteria; p__Bacteroidetes; c__Bacteroidia; o__Bacteroidales; f__; g__; s__	200	0.00221618	#DIV/0!	0.0139741	0	0.0142817	0	0.00387177	0	0	0.00541735	0.00687342	0.013258	0.0103239	0.0171938	0.0404444	0.0136276	0.032634	0	0.0414528	0.0105404	0	0	0	0	0	0	0	0	0	0	0	0	0
k__Bacteria; p__Bacteroidetes; c__Bacteroidia; o__Bacteroidales; f__; g__; s__	201	0.966777	-0.464395	0.0314826	0.0434378	0.0372459	0.0731961	0.0348459	0.00875427	0.111044	0.0267256	0.105679	0.0107721	0.00471949	0.0176995	0.0242667	0.00464578	0.0710956	0.00394497	0	0.0165635	0.0288309	0.0167275	0.0563277	0.0546662	0.00767519	0.0132433	0.00155031	0.276539	0.00441335	0.00728014	0.0456502	0.0517875	0
k__Bacteria; p__Bacteroidetes; c__Bacteroidia; o__Bacteroidales; f__; g__; s__	202	0.000458554	6.33807	0.174684	0.00215926	0.230203	0.00395696	0.0425894	0.0525256	0.0124283	0.641415	0.0446772	0.18064	0.0831809	0.092543	0.0436222	0.684787	0.0827506	0.410277	0.0605848	0.013552	0	0	0.00130995	0.0011884	0.00074276	0.013993	0	0.00452667	0	0.00107854	0	0.00523106	0
k__Bacteria; p__Bacteroidetes; c__Bacteroidia; o__Bacteroidales; f__; g__; s__	203	0.000514711	3.61302	1.64277	0.134261	0.959294	0.336923	1.86232	3.58925	0.41986	0.777932	1.34146	1.43021	1.34623	0.846035	2.17418	3.59304	2.12121	1.03358	1.22126	1.24226	0.0170364	1.17929	0.0170293	0.00831878	0.00718001	0.00824586	0.00341067	0.45061	0.00662003	0.00134817	0.0440198	0.00104621	0.00123535
k__Bacteria; p__Bacteroidetes; c__Bacteroidia; o__Bacteroidales; f__; g__; s__	204	0.00461852	-8.5436	0.000137673	0.0513724	0.00044325	0.0944555	0	0	0.00027018	0	0	0.00165725	0	0	0	0	0	0	0	0	0.268652	0.0167275	0.25544	0.0190143	0.0438228	0.015992	0.0297659	0.000823032	0.0154467	0.00215708	0	0	0
k__Bacteria; p__Bacteroidetes; c__Bacteroidia; o__Bacteroidales; f__; g__; s__	205	0.00647832	11.7617	0.0667423	1.92211e-05	0.226261	6.93027e-05	0	0.0175085	0.00675451	0.0050562	0.852304	0.0113245	0.000884904	0	0.00202222	0.00371662	0.030303	0	0	0.00451732	0	0	0	0	0	0.000249874	0	0	0	0	0	0	0
k__Bacteria; p__Bacteroidetes; c__Bacteroidia; o__Bacteroidales; f__; g__; s__	206	0.31925	-1.69071	0.00277545	0.00895954	0.00236248	0.0102385	0.00774353	0	0.00432289	0.00216694	0.00257753	0.00165725	0.000884904	0.00353989	0.00491111	0.00495549	0.0011655	0.00493121	0	0	0	0.0111517	0	0.0178259	0.00445656	0.00324837	0	0.0238679	0	0.00350525	0.0163036	0.00523106	0.0308836
k__Bacteria; p__Bacteroidetes; c__Bacteroidia; o__Bacteroidales; f__; g__; s__	207	0.000551991	3.82298	0.0488308	0.00345033	0.0418916	0.0123662	0.0929224	0.00875427	0.0286391	0.00216694	0.01747	0.0323163	0.0315616	0.04703	0.101111	0.075881	0.148019	0.0345185	0.0542075	0.00903465	0	0.0446068	0	0	0.000247587	0	0	0	0	0	0	0	0
k__Bacteria; p__Bacteroidetes; c__Bacteroidia; o__Bacteroidales; f__; g__; s__	208	0.011125	#DIV/0!	0.00488343	0	0.00936809	0	0	0	0.00027018	0.000361157	0.00200475	0.00193346	0	0.0111254	0.0332222	0.0034069	0	0.000986242	0	0.0150577	0	0	0	0	0	0	0	0	0	0	0	0	0
k__Bacteria; p__Bacteroidetes; c__Bacteroidia; o__Bacteroidales; f__; g__; s__	209	0.000514711	#DIV/0!	0.0143183	0	0.0154091	0	0.00387177	0	0.0013509	0.00144463	0.00343671	0.0370119	0.00471949	0.0257907	0.0317778	0.0213706	0.00699301	0.0128211	0.00318867	0.046679	0	0	0	0	0	0	0	0	0	0	0	0	0
k__Bacteria; p__Bacteroidetes; c__Bacteroidia; o__Bacteroidales; f__; g__; s__	210	0.000458554	8.24251	0.0408296	0.000134813	0.0357541	0.000344458	0.0309741	0.00875427	0.00783523	0.00577851	0.014606	0.041155	0.0439502	0.128448	0.0638444	0.0963224	0.041958	0.0394497	0.00637735	0.0421617	0	0	0	0	0.000247587	0	0	0	0	0.000269635	0	0	0.00123535
k__Bacteria; p__Bacteroidetes; c__Bacteroidia; o__Bacteroidales; f__; g__; s__	211	0.000794953	-3.83333	0.00115926	0.0165246	0.00201088	0.0113537	0	0	0.000810541	0	0.000859178	0.000828624	0.00117987	0	0.00144444	0.000619437	0	0.00295873	0	0.00752887	0.0353834	0.0139396	0.0275089	0.0249563	0.00841795	0.0114942	0.00744147	0.0164606	0.0220668	0.000269635	0.0342376	0.00523106	0.00741207
k__Bacteria; p__Bacteroidetes; c__Bacteroidia; o__Bacteroidales; f__; g__; s__	212	0.000514711	10.5172	0.0589698	4.02389e-05	0.0794652	0.000145083	0	0.306399	0.0116178	0.0148074	0.0461092	0.115179	0.0265471	0.0242736	0.0988	0.0845531	0.030303	0.0167661	0.00956602	0.0406559	0	0	0	0	0	0	0	0	0	0	0	0.000523106	0
k__Bacteria; p__Bacteroidetes; c__Bacteroidia; o__Bacteroidales; f__; g__; s__	213	0.00502736	-1.92696	0.0080828	0.0307352	0.0139148	0.0256892	0	0	0.0129687	0.000361157	0.0154652	0.00469554	0.000294968	0.0020228	0	0.000309718	0	0.0424084	0	0.0346328	0.0366939	0.0139396	0.0772868	0.0356519	0.0138649	0.00699648	0.0390677	0.00905335	0.00662003	0.0186048	0.0864093	0.0183087	0.0370604
k__Bacteria; p__Bacteroidetes; c__Bacteroidia; o__Bacteroidales; f__; g__; s__	214	0.000622117	6.4703	0.0151978	0.000171406	0.0220105	0.000618014	0.00774353	0.0612799	0.00324217	0	0.0690206	0.00580037	0.0188779	0.00505699	0.0176222	0.000929155	0.0128205	0.000986242	0.00637735	0.00301155	0	0	0	0	0.00222828	0	0	0	0	0	0	0	0
k__Bacteria; p__Bacteroidetes; c__Bacteroidia; o__Bacteroidales; f__; g__; s__	215	0.00305382	2.05089	0.0276421	0.006671	0.0195978	0.012856	0.050333	0.0612799	0.00837559	0.00216694	0.00801899	0.0591085	0.0315616	0.0136539	0.0401555	0.0263261	0.0198135	0.00986242	0.0382641	0.0180693	0.00655248	0.0167275	0	0	0.000247587	0	0.000310061	0.0102879	0.00662003	0.000269635	0	0	0.0457078
k__Bacteria; p__Bacteroidetes; c__Bacteroidia; o__Bacteroidales; f__; g__; s__	216	0.249954	-4.06771	0.00139022	0.0233123	0.00480981	0.0399519	0	0	0	0	0	0.00110483	0	0	0.000288889	0	0	0	0	0.0180693	0	0	0	0	0.0304532	0.0732132	0.000310061	0.000823032	0	0.0873617	0	0.110898	0
k__Bacteria; p__Bacteroidetes; c__Bacteroidia; o__Bacteroidales; f__; g__; s__	217	0.00221618	#DIV/0!	0.0106058	0	0.0163118	0	0	0.00875427	0.00378253	0.0104735	0.00286393	0.00580037	0	0.0146653	0.0184889	0.00185831	0.00815851	0.00986242	0.0637735	0	0	0	0	0	0	0	0	0	0	0	0	0	0
k__Bacteria; p__Bacteroidetes; c__Bacteroidia; o__Bacteroidales; f__; g__; s__	218	0.0240997	#DIV/0!	0.00551688	0	0.0094464	0	0	0	0	0.00144463	0	0.00524795	0.0156333	0.0166881	0.000866666	0	0.0034965	0.00197248	0.0318867	0	0	0	0	0	0	0	0	0	0	0	0	0	0
k__Bacteria; p__Bacteroidetes; c__Bacteroidia; o__Bacteroidales; f__; g__; s__	219	0.00502736	2.83842	0.0378938	0.00529806	0.0752174	0.0139307	0.00387177	0.00875427	0.00351235	0.00180578	0.0312168	0.0588323	0.292608	0.0237679	0.0375555	0.00898183	0.00699301	0	0.0255094	0.0271039	0.0013105	0	0	0	0	0.000749623	0.000620122	0.0172837	0	0	0.0489109	0	0
k__Bacteria; p__Bacteroidetes; c__Bacteroidia; o__Bacteroidales; f__; g__; s__	220	0.0492719	#DIV/0!	0.00885678	0	0.0176244	0	0	0	0	0.000361157	0	0.0154676	0.00117987	0.00657409	0.0479555	0.0504841	0	0.00197248	0	0	0	0	0	0	0	0	0	0	0	0	0	0	0
k__Bacteria; p__Bacteroidetes; c__Bacteroidia; o__Bacteroidales; f__; g__; s__	221	0.537264	-1.16424	0.00336055	0.00753151	0.00956387	0.0156695	0	0	0.00027018	0.000361157	0.000286393	0.000276208	0	0.0020228	0.00115556	0.000619437	0	0.00591745	0	0.0361386	0	0.0250913	0.00523979	0.00831878	0	0.000499749	0.00124024	0.0543201	0	0	0.00163036	0.00156932	0
k__Bacteria; p__Bacteroidetes; c__Bacteroidia; o__Bacteroidales; f__; g__; s__	222	0.308192	0.872948	0.0136268	0.00744064	0.013124	0.00808778	0	0	0.00297198	0.00722314	0.0166108	0.0165725	0.009144	0.0338818	0.0372667	0.0123887	0.0151515	0.00493121	0	0.0346328	0.0222784	0	0.00130995	0.0225795	0	0.000749623	0.00651128	0.00699577	0.0132401	0.00458379	0.00489109	0	0.0135888
k__Bacteria; p__Bacteroidetes; c__Bacteroidia; o__Bacteroidales; f__; g__; s__	223	0.22369	-0.040128	0.0443986	0.0456509	0.0608988	0.0262389	0.00387177	0.00875427	0.0126985	0.0502008	0.248016	0.0367357	0.0451301	0.0131482	0.013	0.0343787	0.041958	0.0552295	0.0223207	0.0361386	0.0393149	0.0641222	0.0641874	0.0736806	0.0502601	0.0209895	0.0378275	0.0707807	0.0485469	0.000808904	0.0391287	0.00104621	0.0827682
k__Bacteria; p__Bacteroidetes; c__Bacteroidia; o__Bacteroidales; f__; g__; s__	224	0.000967903	#DIV/0!	0.0348225	0	0.0440597	0	0	0.0262628	0.0291795	0.0133628	0.00171836	0.0905962	0.00294968	0.0217451	0.0274444	0.000309718	0.0361305	0.145964	0	0.0918523	0	0	0	0	0	0	0	0	0	0	0	0	0
k__Bacteria; p__Bacteroidetes; c__Bacteroidia; o__Bacteroidales; f__; g__; s__	225	0.000514711	#DIV/0!	0.0605526	0	0.0619625	0	0.0232306	0.00875427	0.00837559	0.011557	0.0446772	0.138656	0.0377559	0.0778777	0.210311	0.111189	0.0501166	0.0138074	0	0.111427	0	0	0	0	0	0	0	0	0	0	0	0	0
k__Bacteria; p__Bacteroidetes; c__Bacteroidia; o__Bacteroidales; f__; g__; s__	226	0.00235092	2.46877	0.0845534	0.0152741	0.0928519	0.0368634	0.104538	0.367679	0.0197232	0.0191413	0.0484004	0.13258	0.018583	0.00505699	0.0352444	0.101278	0.0571096	0.0887618	0.14349	0.0421617	0	0.0418188	0	0	0	0	0.000620122	0.130039	0	0	0.0260858	0	0
k__Bacteria; p__Bacteroidetes; c__Bacteroidia; o__Bacteroidales; f__; g__; s__	227	0.135107	6.93412	0.00253636	2.07411e-05	0.00454459	7.47832e-05	0	0	0.000540361	0	0	0.0160201	0.00501445	0.0030342	0.00346667	0.00743324	0	0	0	0	0	0	0	0	0	0	0	0	0	0.000269635	0	0	0
k__Bacteria; p__Bacteroidetes; c__Bacteroidia; o__Bacteroidales; f__; g__; s__	228	0.000458554	7.44955	0.0145021	8.29646e-05	0.0125847	0.000299133	0.0193588	0.0175085	0.000810541	0.00180578	0.00229114	0.00607658	0.0144534	0.00910259	0.0147333	0.0213706	0.0512821	0.0177524	0.0159434	0.0105404	0	0	0	0	0	0	0	0	0	0.00107854	0	0	0
k__Bacteria; p__Bacteroidetes; c__Bacteroidia; o__Bacteroidales; f__; g__; s__	229	0.00959346	-5.08652	0.000350548	0.0119108	0.000655258	0.0239246	0	0	0	0.00180578	0.00143196	0.00138104	0	0	0.000288889	0	0	0	0	0	0.00524198	0.00278792	0.0104796	0	0.0235207	0	0.00651128	0.00288061	0.0882671	0.00053927	0.0130429	0.00156932	0
k__Bacteria; p__Bacteroidetes; c__Bacteroidia; o__Bacteroidales; f__; g__; s__	230	0.00959346	1.28284	0.0182524	0.0075015	0.0163183	0.0201795	0	0.0350171	0.00891595	0.00216694	0.00658703	0.00552416	0.0106188	0.0131482	0.0239778	0.04398	0.013986	0.0167661	0.019132	0.0557137	0	0.0696981	0	0	0	0.000249874	0	0.0275716	0	0	0	0	0
k__Bacteria; p__Bacteroidetes; c__Bacteroidia; o__Bacteroidales; f__; g__; s__	231	0.00840891	1.06485	0.069821	0.0333761	0.0645329	0.0910224	0.0348459	0.0875427	0.0116178	0.00108347	0.0492595	0.0301067	0.036871	0.0268021	0.182289	0.229811	0.0524476	0.0591745	0.0988489	0.0767945	0	0.323399	0.00392984	0	0.00297104	0.001999	0	0.0962947	0	0.00215708	0	0.00313863	0
k__Bacteria; p__Bacteroidetes; c__Bacteroidia; o__Bacteroidales; f__; g__; s__	232	0.846161	-0.786529	0.00697914	0.0120384	0.010854	0.0176089	0	0	0.0324217	0.000361157	0.00200475	0.00994349	0.00294968	0.000505699	0.0277333	0.0161054	0.0011655	0	0	0.00451732	0	0.0167275	0.00130995	0	0.0259966	0.0282358	0.00124024	0.00823032	0	0.0595893	0	0.0151701	0
k__Bacteria; p__Bacteroidetes; c__Bacteroidia; o__Bacteroidales; f__; g__; s__	233	0.977175	-1.55605	0.0010634	0.00312689	0.00262506	0.00736987	0	0	0.00027018	0	0.00830539	0	0	0	0.000288889	0	0	0	0	0.0060231	0	0	0	0	0	0	0	0.0181067	0	0.00134817	0.0211947	0	0
k__Bacteria; p__Bacteroidetes; c__Bacteroidia; o__Bacteroidales; f__; g__; s__	234	0.846161	-0.802654	0.00816795	0.0142474	0.00591861	0.0178719	0.0154871	0.0175085	0.00810541	0.00180578	0.00859178	0.0035907	0.000884904	0.0010114	0.0109778	0.0188928	0.0034965	0.00690369	0.00956602	0.00752887	0.0013105	0.036243	0.00523979	0.0320867	0.00074276	0.0524736	0	0.0337443	0.00441335	0.00754977	0.0114125	0	0
k__Bacteria; p__Bacteroidetes; c__Bacteroidia; o__Bacteroidales; f__; g__; s__	235	0.000458554	8.30736	0.109077	0.000344323	0.137502	0.000552587	0.139384	0.0175085	0.0210741	0.0306983	0.425866	0.00966728	0.082296	0.173455	0.399822	0.0743324	0.0268065	0.0394497	0.0159434	0.0707714	0.0013105	0	0	0.0011884	0.00074276	0	0	0.00123455	0	0	0	0	0
k__Bacteria; p__Bacteroidetes; c__Bacteroidia; o__Bacteroidales; f__; g__; s__	236	0.296935	-0.728257	0.00713535	0.0118207	0.00883655	0.0126647	0	0	0.0275584	0	0.00887817	0	0.00471949	0.0020228	0.0132889	0.00619437	0.00699301	0.00295873	0.00318867	0.0240924	0.0432464	0.00836377	0.00392984	0.00713038	0.000495173	0.001999	0	0.0283946	0.00662003	0.00323562	0.017934	0.0125545	0.0197655
k__Bacteria; p__Bacteroidetes; c__Bacteroidia; o__Bacteroidales; f__; g__; s__	237	0.0173895	3.45632	0.00239962	0.000218619	0.00271894	0.00059992	0.00774353	0	0.000540361	0	0	0.00441933	0.000294968	0.0010114	0.00664444	0.00557493	0.0011655	0	0.00318867	0.00301155	0	0	0	0	0	0.000749623	0	0	0	0	0	0.00209242	0
k__Bacteria; p__Bacteroidetes; c__Bacteroidia; o__Bacteroidales; f__; g__; s__	238	0.000967903	#DIV/0!	0.0188049	0	0.0122219	0	0.0271024	0.0262628	0.00297198	0.0104735	0.01747	0.0229253	0.0256622	0.0161824	0.0323555	0.0353079	0.0337995	0	0.0127547	0	0	0	0	0	0	0	0	0	0	0	0	0	0
k__Bacteria; p__Bacteroidetes; c__Bacteroidia; o__Bacteroidales; f__; g__; s__	239	0.0646966	-5.01277	7.47186e-05	0.00241226	0.000190053	0.0034577	0	0	0.000540361	0	0	0	0	0.000505699	0	0	0	0	0	0	0.0013105	0	0	0.0011884	0.00074276	0.00499749	0	0.00699577	0	0.00566233	0	0.0104621	0
k__Bacteria; p__Bacteroidetes; c__Bacteroidia; o__Bacteroidales; f__; g__; s__	240	0.365528	-0.497546	0.121011	0.170845	0.137894	0.304594	0.495586	0.0962969	0.0416078	0.0429777	0.147206	0.0182297	0.0286119	0.0536041	0.2158	0.26419	0.013986	0.0562158	0	0.219843	0.429843	0.00557585	0.49254	1.02321	0.00272345	0.035732	0.0139528	0.0106994	0.0220668	0.000808904	0.0880397	0.00313863	0.0926509
k__Bacteria; p__Bacteroidetes; c__Bacteroidia; o__Bacteroidales; f__; g__; s__	241	0.422404	0.838908	0.0447308	0.0250075	0.124514	0.0624819	0	0	0.00513343	0.000722314	0.0128877	0	0.064008	0	0	0	0.0524476	0.0197248	0	0.471307	0	0.128244	0	0	0	0.000249874	0.000310061	0.196293	0	0	0	0	0
k__Bacteria; p__Bacteroidetes; c__Bacteroidia; o__Bacteroidales; f__; g__; s__	242	0.00737679	2.8309	0.015338	0.00215568	0.0179591	0.00538995	0.00387177	0.0700341	0.00675451	0.00541735	0.016038	0.00745762	0.0159283	0.0111254	0.0294667	0.00650409	0.0198135	0	0.0223207	0	0	0.0111517	0	0	0	0	0	0.0168722	0	0	0	0	0
k__Bacteria; p__Bacteroidetes; c__Bacteroidia; o__Bacteroidales; f__; g__; s__	243	0.55066	-0.919078	0.0411765	0.0778609	0.0196826	0.0657836	0.0116153	0.0525256	0.0416078	0.0238364	0.091932	0.0281732	0.0348062	0.0490528	0.0543111	0.0337593	0.0407925	0.0345185	0.0223207	0.0572194	0.0327624	0.0278792	0.0445382	0.134289	0.220847	0.120939	0.0108521	0.0111109	0.0242735	0.0248064	0.112495	0.104098	0.1433
k__Bacteria; p__Bacteroidetes; c__Bacteroidia; o__Bacteroidales; f__; g__; s__	244	0.00502736	0.508716	0.148596	0.10444	0.138868	0.313826	0.588509	0.262628	0.122932	0.163604	0.0985191	0.0870055	0.0846558	0.0601782	0.140111	0.135347	0.159674	0.0463534	0.0510188	0.0798061	0	0.22861	0.00130995	0	0	0.000249874	0	1.12755	0	0	0	0	0
k__Bacteria; p__Bacteroidetes; c__Bacteroidia; o__Bacteroidales; f__; g__; s__	245	0.000794953	-3.16121	0.00665239	0.0595109	0.00682381	0.0467556	0	0	0.00324217	0.00361157	0.00687342	0.00497174	0.00943897	0.0020228	0.00953333	0.00247775	0.016317	0.000986242	0.00956602	0.0240924	0.0760088	0.00836377	0.104796	0.0249563	0.0351573	0.125937	0.0874373	0.012757	0.130194	0.0105158	0.104343	0.00993901	0.0432371
k__Bacteria; p__Bacteroidetes; c__Bacteroidia; o__Bacteroidales; f__; g__; s__	246	0.000458554	10.9533	0.0797836	4.02389e-05	0.0698676	0.000145083	0.0696918	0.157577	0.0275584	0.0306983	0.126872	0.251625	0.0442452	0.0981057	0.0485333	0.130082	0.0151515	0.102569	0.0127547	0.00150577	0	0	0	0	0	0	0	0	0	0	0	0.000523106	0
k__Bacteria; p__Bacteroidetes; c__Bacteroidia; o__Bacteroidales; f__; g__; s__	247	0.000967903	#DIV/0!	0.0214652	0	0.0289082	0	0.0348459	0	0.000540361	0.00180578	0	0.049165	0.00117987	0.000505699	0.0158889	0.0421217	0.00699301	0.0138074	0.102038	0.0316213	0	0	0	0	0	0	0	0	0	0	0	0	0
k__Bacteria; p__Bacteroidetes; c__Bacteroidia; o__Bacteroidales; f__; g__; s__	248	0.00221618	#DIV/0!	0.00654488	0	0.00824805	0	0.00387177	0	0.00297198	0.00216694	0	0.00580037	0	0.00859689	0.0164667	0.00557493	0.002331	0.0295873	0.0127547	0.00150577	0	0	0	0	0	0	0	0	0	0	0	0	0
k__Bacteria; p__Bacteroidetes; c__Bacteroidia; o__Bacteroidales; f__; g__; s__	249	0.000551991	4.06127	0.0552877	0.0033118	0.0702615	0.011575	0.0309741	0.0175085	0.00702469	0.0274479	0.0077326	0.0591085	0.0427703	0.0293306	0.108044	0.056059	0.0664336	0.0128211	0.0286981	0.280074	0	0.0418188	0	0	0	0	0	0.00123455	0	0	0	0	0
k__Bacteria; p__Bacteroidetes; c__Bacteroidia; o__Bacteroidales; f__; g__; s__	250	0.000514711	#DIV/0!	0.0499817	0	0.0597293	0	0	0.0700341	0.0102669	0.00613967	0.00945096	0.106892	0.00973394	0.139067	0.198467	0.0501744	0.0221445	0.00394497	0.0478301	0.0255982	0	0	0	0	0	0	0	0	0	0	0	0	0
k__Bacteria; p__Bacteroidetes; c__Bacteroidia; o__Bacteroidales; f__; g__; s__	251	0.21523	-2.68488	0.000943514	0.00606706	0.00141631	0.0117092	0	0	0.0013509	0.000361157	0.00486867	0.00193346	0	0.000505699	0	0.00185831	0.002331	0	0	0	0	0	0	0	0.0433277	0.0112443	0.000930184	0.00534971	0.00220668	0.00458379	0.00652146	0.00470795	0
k__Bacteria; p__Bacteroidetes; c__Bacteroidia; o__Bacteroidales; f__; g__; s__	252	0.000622117	6.09103	0.0199529	0.000292701	0.0262718	0.000772268	0.0193588	0	0.00189126	0.00469504	0.0040095	0.0151914	0.00855407	0.00404559	0.0985111	0.0374759	0.041958	0.00591745	0.0286981	0.00903465	0	0	0	0	0.000247587	0.00274862	0	0	0	0.000808904	0	0	0
k__Bacteria; p__Bacteroidetes; c__Bacteroidia; o__Bacteroidales; f__; g__; s__	253	0.000514711	4.59427	0.0305286	0.00126384	0.0435895	0.00269421	0.00774353	0.00875427	0.00486325	0.0148074	0.00801899	0.173182	0.018583	0.0515813	0.0465111	0.0288038	0.025641	0.0167661	0.019132	0.00301155	0	0	0	0	0	0.00849573	0.00186037	0.000411516	0	0.00566233	0	0	0
k__Bacteria; p__Bacteroidetes; c__Bacteroidia; o__Bacteroidales; f__; g__; s__	254	0.259014	0.747737	0.0254888	0.0151795	0.0185854	0.0106915	0.0116153	0.00875427	0.00567379	0.00975124	0.0114557	0.027897	0.0144534	0.0333761	0.0375555	0.051723	0.0536131	0.0226836	0.00956602	0.0587252	0.0222784	0.00278792	0.0130995	0.00713038	0.0269869	0.0112443	0.0127125	0.00493819	0.0375135	0.025076	0.0163036	0.0172625	0
k__Bacteria; p__Bacteroidetes; c__Bacteroidia; o__Bacteroidales; f__; g__; s__	255	0.00502736	#DIV/0!	0.00288138	0	0.00404297	0	0	0	0.00378253	0.00108347	0.0105965	0.00110483	0.00471949	0.000505699	0	0.00154859	0.0011655	0.0128211	0	0.00301155	0	0	0	0	0	0	0	0	0	0	0	0	0
k__Bacteria; p__Bacteroidetes; c__Bacteroidia; o__Bacteroidales; f__; g__; s__	256	1	#DIV/0!	0	0	0	0	0	0	0	0	0	0	0	0	0	0	0	0	0	0	0	0	0	0	0	0	0	0	0	0	0	0	0
k__Bacteria; p__Bacteroidetes; c__Bacteroidia; o__Bacteroidales; f__; g__; s__	257	0.000458554	#DIV/0!	0.0286053	0	0.037665	0	0.0271024	0.00875427	0.0027018	0.018419	0.0157516	0.145009	0.0073742	0.00404559	0.0167555	0.0117693	0.016317	0.065092	0.0478301	0.013552	0	0	0	0	0	0	0	0	0	0	0	0	0
k__Bacteria; p__Bacteroidetes; c__Bacteroidia; o__Bacteroidales; f__; g__; s__	258	0.0173895	4.11004	0.00458177	0.000265332	0.00790682	0.000768607	0	0	0.00108072	0.00397273	0.00286393	0.00745762	0.00855407	0.030342	0.00404444	0.000309718	0.002331	0	0.00318867	0	0	0.00278792	0	0	0	0.000249874	0	0.000411516	0	0	0	0	0
k__Bacteria; p__Bacteroidetes; c__Bacteroidia; o__Bacteroidales; f__; g__; s__	259	0.000794953	4.8158	0.0124663	0.000442628	0.0116807	0.00159592	0.0116153	0	0.00405271	0.00144463	0.000572785	0.0267922	0.0082591	0.00707979	0.00808889	0.00495549	0.0174825	0.032546	0.0350754	0.0165635	0	0	0	0	0	0	0	0	0	0	0	0.00575416	0
k__Bacteria; p__Bacteroidetes; c__Bacteroidia; o__Bacteroidales; f__; g__; s__	260	0.00123317	4.68801	0.00734372	0.000284896	0.00796475	0.00102721	0.00387177	0	0.00918614	0.0050562	0.00572785	0.0306591	0.00678426	0.00556269	0.00664444	0.00371662	0.004662	0.0177524	0.00318867	0	0	0	0	0	0	0	0	0.00370364	0	0	0	0	0
k__Bacteria; p__Bacteroidetes; c__Bacteroidia; o__Bacteroidales; f__; g__; s__	261	0.0118512	1.37376	0.0132592	0.00511652	0.00973727	0.00853679	0.00387177	0.00875427	0.00864577	0.00469504	0.0077326	0.013258	0.00707923	0.00606839	0.0132889	0.0291135	0.025641	0.00690369	0.0159434	0.0346328	0.0144155	0.00836377	0.00261989	0.00475359	0.00148552	0.00524736	0	0.0296291	0	0	0	0	0
k__Bacteria; p__Bacteroidetes; c__Bacteroidia; o__Bacteroidales; f__; g__; s__	262	0.00176889	3.58444	0.0133793	0.00111535	0.0112599	0.00137893	0.0193588	0	0.00216144	0.00288925	0.0128877	0.0107721	0.0215327	0.0268021	0.0257111	0.0377856	0.00815851	0.00986242	0.00637735	0.00301155	0	0	0	0	0.00123793	0.00299849	0	0.00329213	0	0.00161781	0.00326073	0.00209242	0
k__Bacteria; p__Bacteroidetes; c__Bacteroidia; o__Bacteroidales; f__; g__; s__	263	0.00502736	4.49201	0.00854779	0.000379861	0.0128634	0.00136961	0	0	0.0113476	0.00469504	0.000859178	0.0116007	0.0100289	0.0495585	0.0115556	0.00216803	0.002331	0.00197248	0	0.013552	0	0	0	0	0	0	0	0.00493819	0	0	0	0	0
k__Bacteria; p__Bacteroidetes; c__Bacteroidia; o__Bacteroidales; f__; g__; s__	264	0.632473	0.0978062	0.000692233	0.000646859	0.00210692	0.00153609	0	0	0.00189126	0	0	0	0	0	0.0078	0	0	0	0	0	0	0	0	0	0.00074276	0.00549724	0	0.00164606	0	0	0	0.000523106	0
k__Bacteria; p__Bacteroidetes; c__Bacteroidia; o__Bacteroidales; f__; g__; s__	265	0.0240997	#DIV/0!	0.00106679	0	0.00166711	0	0	0	0	0.000361157	0	0.000552416	0.000589936	0.000505699	0.00577778	0.00185831	0.002331	0.00295873	0	0	0	0	0	0	0	0	0	0	0	0	0	0	0
k__Bacteria; p__Bacteroidetes; c__Bacteroidia; o__Bacteroidales; f__; g__; s__	266	0.00502736	#DIV/0!	0.00518239	0	0.0092696	0	0	0	0	0.00108347	0.00744621	0.00662899	0.000589936	0.0030342	0.0346667	0.00123887	0.0011655	0.00394497	0.0127547	0	0	0	0	0	0	0	0	0	0	0	0	0	0
k__Bacteria; p__Bacteroidetes; c__Bacteroidia; o__Bacteroidales; f__; g__; s__	267	0.239594	8.79682	0.0106074	2.38509e-05	0.0249649	8.59955e-05	0.0813071	0.00875427	0.00108072	0	0	0.00276208	0	0	0.0546	0	0	0	0	0	0	0	0	0	0	0	0.000310061	0	0	0	0	0	0
k__Bacteria; p__Bacteroidetes; c__Bacteroidia; o__Bacteroidales; f__; g__; s__	268	0.948646	-2.26132	0.00193544	0.00927906	0.00229947	0.0196342	0	0	0.00567379	0	0.000572785	0.00220966	0.000884904	0.0025285	0.00288889	0.00247775	0.002331	0	0	0.00752887	0.0353834	0	0.00916962	0	0	0	0.00248049	0.00205758	0.0662003	0	0.00163036	0	0.00370604
k__Bacteria; p__Bacteroidetes; c__Bacteroidia; o__Bacteroidales; f__; g__; s__	269	0.786803	-5.25103	0.00415819	0.158351	0.00750088	0.4753	0	0.00875427	0.0256671	0.00144463	0.00143196	0.000552416	0.000294968	0.0010114	0.00115556	0.00185831	0	0.000986242	0	0.0150577	0	0.312247	0.0104796	0	0	0.00124937	0.000310061	1.71438	0	0.00754977	0	0	0.0123535
k__Bacteria; p__Bacteroidetes; c__Bacteroidia; o__Bacteroidales; f__; g__; s__	270	0.0581978	5.00433	0.00707328	0.000220378	0.0121199	0.000543969	0	0	0.0129687	0.00216694	0.00515507	0.00524795	0	0.0010114	0.00664444	0	0	0.0236698	0	0.0421617	0	0	0	0	0	0	0	0.00123455	0	0	0.00163036	0	0
k__Bacteria; p__Bacteroidetes; c__Bacteroidia; o__Bacteroidales; f__; g__; s__	271	0.385692	#NUM!	0	0.0011416	0	0.00274173	0	0	0	0	0	0	0	0	0	0	0	0	0	0	0	0	0	0	0.000247587	0.00674661	0	0	0	0	0	0.00784658	0
k__Bacteria; p__Bacteroidetes; c__Bacteroidia; o__Bacteroidales; f__; g__; s__	272	0.000514711	4.51094	0.0983849	0.00431518	0.143257	0.01408	0.0309741	0.0350171	0.0537659	0.0538124	0.0801899	0.041155	0.018288	0.569417	0.170444	0.0148665	0.034965	0.102569	0.0318867	0.140037	0	0	0	0	0.0510028	0	0	0.000411516	0.00441335	0.000269635	0	0	0
k__Bacteria; p__Bacteroidetes; c__Bacteroidia; o__Bacteroidales; f__; g__; s__	273	0.308192	-2.80904	0.000506214	0.00354764	0.000755575	0.0101959	0	0	0.00027018	0.000722314	0.00257753	0	0.000884904	0.000505699	0.000577778	0.00154859	0	0	0	0	0	0.036243	0	0	0	0	0	0.00987638	0	0	0	0	0
k__Bacteria; p__Bacteroidetes; c__Bacteroidia; o__Bacteroidales; f__; g__; s__	274	0.000514711	#DIV/0!	0.0244455	0	0.0229056	0	0.0271024	0	0.00027018	0.0173355	0.0040095	0.0336974	0.0168132	0.0131482	0.0670222	0.0734032	0.013986	0.00591745	0.0318867	0.0376444	0	0	0	0	0	0	0	0	0	0	0	0	0
k__Bacteria; p__Bacteroidetes; c__Bacteroidia; o__Bacteroidales; f__; g__; s__	275	0.000458554	10.7912	0.0337492	1.90451e-05	0.0225283	6.86682e-05	0.0116153	0.00875427	0.0561975	0.0433388	0.0363719	0.00662899	0.0359861	0.0637181	0.0800222	0.0133179	0.0314685	0.0177524	0.019132	0.0481848	0	0	0	0	0.000247587	0	0	0	0	0	0	0	0
k__Bacteria; p__Bacteroidetes; c__Bacteroidia; o__Bacteroidales; f__; g__; s__	276	0.000458554	6.68741	0.0884114	0.000857822	0.0498128	0.00309292	0.0309741	0.0612799	0.0280988	0.0339487	0.110548	0.141971	0.111498	0.180535	0.1274	0.13163	0.124709	0.0355047	0.0669622	0.0527021	0	0.0111517	0	0	0	0	0	0	0	0	0	0	0
k__Bacteria; p__Bacteroidetes; c__Bacteroidia; o__Bacteroidales; f__; g__; s__	277	0.000458554	8.80029	0.0285719	6.40897e-05	0.0257877	0.000162373	0.0116153	0.0350171	0.010537	0.0130016	0.0217658	0.027897	0.0648929	0.0015171	0.0702	0.058227	0.0011655	0.00197248	0.0159434	0.0662541	0	0	0	0	0	0	0.000310061	0	0	0	0	0.000523106	0
k__Bacteria; p__Bacteroidetes; c__Bacteroidia; o__Bacteroidales; f__; g__; s__	278	0.00139711	2.50048	0.0847697	0.0149803	0.0395763	0.0453478	0.0696918	0.0175085	0.0140494	0.0653694	0.10081	0.103302	0.0687275	0.152215	0.106311	0.097871	0.128205	0.0660782	0.0701508	0.126485	0	0.164487	0.00654973	0	0	0.000249874	0	0.0222219	0	0	0	0	0.00123535
k__Bacteria; p__Bacteroidetes; c__Bacteroidia; o__Bacteroidales; f__; g__; s__	279	0.0240997	#DIV/0!	0.00310535	0	0.00479339	0	0	0.0175085	0	0	0	0.00552416	0.000294968	0.0020228	0	0	0.00699301	0.00493121	0.00318867	0.00301155	0	0	0	0	0	0	0	0	0	0	0	0	0
k__Bacteria; p__Bacteroidetes; c__Bacteroidia; o__Bacteroidales; f__; g__; s__	280	0.00737679	-2.63511	0.00167319	0.0103943	0.00272492	0.0129816	0.00387177	0	0.00459307	0	0	0.000276208	0	0.00859689	0.00115556	0	0	0.00493121	0	0	0.00393149	0	0.00523979	0.00356519	0.0126269	0.0202398	0.00837165	0.00617274	0.00220668	0.0124032	0.00326073	0.049695	0.00741207
k__Bacteria; p__Bacteroidetes; c__Bacteroidia; o__Bacteroidales; f__; g__; s__	281	0.00647832	1.19723	0.114344	0.0498667	0.0744344	0.110799	0.247793	0.201348	0.0297198	0.0249198	0.137755	0.0552416	0.0530942	0.0359046	0.104867	0.232908	0.101399	0.0838306	0.133924	0.158106	0	0.373582	0.0157194	0	0.00222828	0.00699648	0.00248049	0.194647	0	0.000808904	0.0423895	0.0094159	0
k__Bacteria; p__Bacteroidetes; c__Bacteroidia; o__Bacteroidales; f__; g__; s__	282	0.0021887	2.37646	0.0599676	0.0115486	0.0489718	0.0121527	0.0271024	0.157577	0.0116178	0.0332264	0.0143196	0.0323163	0.0377559	0.0212394	0.0511333	0.116764	0.0722611	0.0305735	0.0860942	0.147566	0.0183469	0.0390309	0.00523979	0.00594198	0.00569449	0.00224887	0.00465092	0.0185182	0.00220668	0.00269635	0.0146733	0	0.0308836
k__Bacteria; p__Bacteroidetes; c__Bacteroidia; o__Bacteroidales; f__; g__; s__	283	0.779203	-4.88034	0.000276555	0.00814534	0.00103477	0.0289769	0.00387177	0	0	0	0	0	0	0	0	0	0	0	0	0	0.0013105	0	0	0.104579	0	0	0	0	0	0	0	0	0
k__Bacteria; p__Bacteroidetes; c__Bacteroidia; o__Bacteroidales; f__; g__; s__	284	0.731306	-0.578647	0.0558714	0.083441	0.0419983	0.106538	0.0193588	0.0175085	0.0791629	0.0158909	0.135464	0.0684996	0.0522093	0.0379274	0.0881111	0.0291135	0.0874126	0.0138074	0.0127547	0.124979	0.0550408	0.108729	0.125755	0.108144	0.0106462	0.0274862	0.0179835	0.412339	0.0154467	0.0207619	0.0798878	0.0308632	0.0716501
k__Bacteria; p__Bacteroidetes; c__Bacteroidia; o__Bacteroidales; f__; g__; s__	285	0.000551991	7.10886	0.0427185	0.000309482	0.0593905	0.00081922	0	0.0350171	0.0154003	0.00577851	0.238851	0.0375643	0.0359861	0.0541098	0.0436222	0.012079	0.0151515	0.0424084	0.00637735	0.0557137	0	0.00278792	0	0	0	0	0	0	0	0	0	0	0.00123535
k__Bacteria; p__Bacteroidetes; c__Bacteroidia; o__Bacteroidales; f__; g__; s__	286	0.000514711	#DIV/0!	0.00432855	0	0.00455813	0	0.00774353	0.0175085	0.000540361	0.00686198	0.000859178	0.0033145	0.000884904	0.00556269	0.0026	0.00247775	0.002331	0.00690369	0	0.00301155	0	0	0	0	0	0	0	0	0	0	0	0	0
k__Bacteria; p__Bacteroidetes; c__Bacteroidia; o__Bacteroidales; f__; g__; s__	287	0.000458554	#DIV/0!	0.0774607	0	0.088586	0	0.205204	0.253874	0.0291795	0.00180578	0.00715982	0.163515	0.0407056	0.00707979	0.00288889	0.0981807	0.191142	0.000986242	0.0255094	0.0572194	0	0	0	0	0	0	0	0	0	0	0	0	0
k__Bacteria; p__Bacteroidetes; c__Bacteroidia; o__Bacteroidales; f__; g__; s__	288	0.119579	-4.00559	0.000268008	0.00430478	0.00054772	0.00976429	0	0	0	0	0.000572785	0.000552416	0.000294968	0	0.00202222	0.000309718	0	0	0	0	0	0.00278792	0	0	0.00123793	0.000499749	0.000620122	0.00164606	0	0.000808904	0.0342376	0.0141239	0
k__Bacteria; p__Bacteroidetes; c__Bacteroidia; o__Bacteroidales; f__; g__; s__	289	0.0209979	-7.37876	1.97291e-05	0.0032835	7.38197e-05	0.00513586	0	0	0	0	0	0.000276208	0	0	0	0	0	0	0	0	0	0	0.00130995	0	0.00445656	0.00874561	0.000930184	0.000411516	0	0.00215708	0	0.0172625	0.00741207
k__Bacteria; p__Bacteroidetes; c__Bacteroidia; o__Bacteroidales; f__; g__; s__	290	0.0021887	2.08319	0.0277378	0.0065459	0.0179696	0.0100857	0.0154871	0.00875427	0.0199934	0.0108347	0.0369446	0.0486126	0.036576	0.072315	0.0317778	0.0371662	0.0244755	0.0108487	0.0255094	0.00903465	0.0013105	0.00557585	0.00392984	0.0190143	0	0	0.0040308	0.0300407	0	0	0.0211947	0	0
k__Bacteria; p__Bacteroidetes; c__Bacteroidia; o__Bacteroidales; f__; g__; s__	291	0.000514711	4.34082	0.0749981	0.00370111	0.0884751	0.00615363	0.0774353	0.0350171	0.00189126	0.0241975	0.0635792	0.0104959	0.027137	0.0455129	0.0632666	0.354008	0.120047	0.0305735	0.127547	0.0692656	0.0222784	0	0.00130995	0	0.00396139	0.00274862	0	0	0.00220668	0.0053927	0	0.00156932	0.00864742
k__Bacteria; p__Bacteroidetes; c__Bacteroidia; o__Bacteroidales; f__; g__; s__	292	0.864606	-0.324546	0.018441	0.0230931	0.0385628	0.0317917	0.0193588	0.00875427	0.00324217	0.000722314	0.00143196	0.00441933	0.00471949	0.0020228	0.00346667	0.148355	0.0314685	0.0226836	0	0.00752887	0.0995977	0.0250913	0.00785968	0	0.00148552	0.0547225	0.000310061	0.000411516	0.00220668	0.0296598	0.00326073	0.0669575	0.00864742
k__Bacteria; p__Bacteroidetes; c__Bacteroidia; o__Bacteroidales; f__; g__; s__	293	0.00305382	1.90526	0.037863	0.0101082	0.0254404	0.0243463	0.0116153	0.0437713	0.00459307	0.0707867	0.0137468	0.0626992	0.0203528	0.0182052	0.0508444	0.00960127	0.027972	0.0779131	0.0637735	0.0542079	0	0.0473947	0.00392984	0	0.000247587	0	0	0.0785995	0	0	0	0	0.00123535
k__Bacteria; p__Bacteroidetes; c__Bacteroidia; o__Bacteroidales; f__; g__; s__	294	0.0712928	-2.40287	0.000161029	0.000851613	0.000287194	0.000997714	0	0	0.000540361	0	0	0.000552416	0.000294968	0	0.000866666	0	0	0	0	0	0	0	0.00130995	0.0011884	0.00148552	0.00349824	0.000310061	0.00123455	0	0.000808904	0	0	0.00123535
k__Bacteria; p__Bacteroidetes; c__Bacteroidia; o__Bacteroidales; f__; g__; s__	295	0.00403061	3.01081	0.0420499	0.00521701	0.0415594	0.00461477	0.0154871	0	0.00486325	0.00650082	0.0581377	0.0201632	0.0430653	0.0182052	0.0543111	0.0532716	0.044289	0.0867893	0.0255094	0.158106	0.00655248	0.0167275	0.00392984	0.00356519	0.00123793	0.001999	0.000930184	0.00658425	0.00220668	0.00107854	0.0114125	0.00418484	0.00741207
k__Bacteria; p__Bacteroidetes; c__Bacteroidia; o__Bacteroidales; f__; g__; s__	296	0.000514711	#DIV/0!	0.0224799	0	0.0190784	0	0	0.0350171	0.000810541	0.00469504	0.0197611	0.0193346	0.00294968	0.00859689	0.0283111	0.0377856	0.0244755	0.061147	0.019132	0.0527021	0	0	0	0	0	0	0	0	0	0	0	0	0
k__Bacteria; p__Bacteroidetes; c__Bacteroidia; o__Bacteroidales; f__; g__; s__	297	0.0135798	3.36946	0.00904112	0.000874812	0.00930055	0.00097932	0.0309741	0	0.00189126	0.00108347	0.0168972	0.00662899	0.0073742	0.0010114	0.0219555	0.00650409	0.016317	0.00690369	0	0.00903465	0.00262099	0	0.00130995	0	0	0.00149925	0.000620122	0.0024691	0	0.00161781	0	0	0.00123535
k__Bacteria; p__Bacteroidetes; c__Bacteroidia; o__Bacteroidales; f__; g__; s__	298	0.0787326	1.43516	0.00231965	0.000857822	0.00309683	0.00309292	0	0	0.00108072	0	0.00429589	0	0.00442452	0	0.00288889	0.000619437	0.00815851	0.00197248	0	0.00903465	0	0.0111517	0	0	0	0	0	0	0	0	0	0	0
k__Bacteria; p__Bacteroidetes; c__Bacteroidia; o__Bacteroidales; f__; g__; s__	299	0.00959346	1.58884	0.0114008	0.00379006	0.00882187	0.00788147	0.0116153	0.0175085	0.000540361	0.00108347	0.00859178	0.0262398	0.0176981	0.0222508	0.0153111	0.0222997	0.0011655	0.00591745	0.00637735	0.00301155	0.00262099	0.0139396	0	0	0.000990347	0.000999498	0.000310061	0.0267485	0	0	0	0.00366174	0
k__Bacteria; p__Bacteroidetes; c__Bacteroidia; o__Bacteroidales; f__; g__; s__	300	0.0872868	0.74811	0.0985858	0.0586963	0.0698625	0.0778924	0.104538	0.18384	0.0113476	0.0205859	0.0277801	0.145838	0.0138635	0.0541098	0.145889	0.23074	0.0839161	0.168647	0.0701508	0.118956	0.0380044	0.0529705	0.0890764	0.0558546	0	0.00949523	0.0198439	0.0106994	0.0507536	0.00296598	0.163036	0.00104621	0.269305
k__Bacteria; p__Bacteroidetes; c__Bacteroidia; o__Bacteroidales; f__; g__; s__	301	0.00502736	#DIV/0!	0.00654294	0	0.00861199	0	0.0271024	0.00875427	0.00108072	0.00577851	0.000572785	0.0154676	0	0.0020228	0.0121333	0.000619437	0	0	0	0.0180693	0	0	0	0	0	0	0	0	0	0	0	0	0
k__Bacteria; p__Bacteroidetes; c__Bacteroidia; o__Bacteroidales; f__; g__; s__	302	0.508559	-0.172329	0.00362711	0.00408731	0.00654182	0.0108081	0	0	0	0	0	0.0243063	0.000294968	0.00404559	0.00491111	0.00650409	0	0	0.00318867	0.00752887	0.00393149	0	0	0	0.000247587	0	0	0	0	0.0102461	0	0.0387098	0
k__Bacteria; p__Bacteroidetes; c__Bacteroidia; o__Bacteroidales; f__; g__; s__	303	0.00737679	2.01721	0.00686782	0.0016966	0.00446378	0.00511402	0	0	0.00648433	0.0050562	0.00257753	0.00718141	0.00589936	0.00707979	0.0132889	0.0126985	0.011655	0.00394497	0.0127547	0.00752887	0	0.00278792	0	0	0	0.000749623	0	0.0185182	0	0	0	0	0
k__Bacteria; p__Bacteroidetes; c__Bacteroidia; o__Bacteroidales; f__; g__; s__	304	0.00221618	#DIV/0!	0.0268365	0	0.0481537	0	0	0	0.00405271	0.0220306	0.000859178	0.00220966	0.00176981	0.0126425	0.00895555	0.00123887	0.145688	0.0512846	0	0.124979	0	0	0	0	0	0	0	0	0	0	0	0	0
k__Bacteria; p__Bacteroidetes; c__Bacteroidia; o__Bacteroidales; f__; g__; s__	305	0.0240997	#DIV/0!	0.00246451	0	0.00304628	0	0	0	0	0	0.000286393	0.00248587	0.00353961	0.0030342	0.00982222	0.00402634	0	0.00493121	0.00637735	0	0	0	0	0	0	0	0	0	0	0	0	0	0
k__Bacteria; p__Bacteroidetes; c__Bacteroidia; o__Bacteroidales; f__; g__; s__	306	0.00840891	-8.78461	2.04566e-05	0.00902119	7.65416e-05	0.0205691	0	0	0	0	0.000286393	0	0	0	0	0	0	0	0	0	0	0.00557585	0.00392984	0.0011884	0	0.00124937	0.00713141	0.00946486	0	0.00593197	0.0766271	0	0.00617673
k__Bacteria; p__Bacteroidetes; c__Bacteroidia; o__Bacteroidales; f__; g__; s__	307	0.00118915	-6.3535	0.00205136	0.16774	0.00466152	0.176675	0.00774353	0	0.00027018	0	0	0.0165725	0.000294968	0	0.000577778	0.000929155	0.002331	0	0	0	0.013105	0	0.0523979	0.0463475	0.508295	0.354322	0.173944	0.00452667	0.154467	0.455144	0.0163036	0.268353	0.133417
k__Bacteria; p__Bacteroidetes; c__Bacteroidia; o__Bacteroidales; f__; g__; s__	308	0.000458554	5.72005	0.0374388	0.000710257	0.0197696	0.00163403	0.00387177	0.0437713	0.022425	0.0119182	0.0575649	0.0469554	0.0162232	0.0647295	0.0505555	0.0675186	0.0361305	0.036491	0.0223207	0.0436675	0	0.00557585	0	0.0011884	0	0	0	0.0024691	0	0	0	0	0
k__Bacteria; p__Bacteroidetes; c__Bacteroidia; o__Bacteroidales; f__; g__; s__	309	0.16748	#DIV/0!	0.000870345	0	0.00185064	0	0	0	0.00162108	0.000722314	0.00143196	0	0	0	0	0	0	0.00690369	0	0.00150577	0	0	0	0	0	0	0	0	0	0	0	0	0
k__Bacteria; p__Bacteroidetes; c__Bacteroidia; o__Bacteroidales; f__; g__; s__	310	0.0341146	-3.31762	0.0014756	0.0147121	0.00373293	0.0188387	0.0116153	0.00875427	0	0	0	0	0	0	0.000288889	0	0	0	0	0	0.0497988	0	0.00654973	0.0237679	0	0.00349824	0.0040308	0.052674	0	0	0.0260858	0.00261553	0.0222362
k__Bacteria; p__Bacteroidetes; c__Bacteroidia; o__Bacteroidales; f__; g__; s__	311	0.746609	-5.72849	1.92986e-05	0.00102323	7.22088e-05	0.0025937	0	0	0.00027018	0	0	0	0	0	0	0	0	0	0	0	0	0.00836377	0	0	0	0	0	0.00493819	0	0	0	0	0
k__Bacteria; p__Bacteroidetes; c__Bacteroidia; o__Bacteroidales; f__; g__; s__	312	0.00266011	6.51569	0.00175872	1.92211e-05	0.00189755	6.93027e-05	0	0	0.000540361	0.00108347	0.00171836	0.000276208	0.00412955	0.0010114	0.00115556	0.00402634	0.002331	0.00197248	0.00637735	0	0	0	0	0	0	0.000249874	0	0	0	0	0	0	0
k__Bacteria; p__Bacteroidetes; c__Bacteroidia; o__Bacteroidales; f__; g__; s__	313	0.879697	0.494626	0.00246737	0.00175121	0.00760503	0.0032962	0	0	0.00027018	0	0.00171836	0	0	0	0	0	0	0.00394497	0	0.0286097	0	0.00278792	0	0.00237679	0	0	0	0.0078188	0	0	0.00978218	0	0
k__Bacteria; p__Bacteroidetes; c__Bacteroidia; o__Bacteroidales; f__; g__; s__	314	0.786803	-1.53293	0.00304708	0.00881743	0.00726795	0.0191681	0	0	0.00810541	0.00108347	0.00143196	0.000276208	0.000294968	0	0.000866666	0	0.0034965	0	0	0.0271039	0	0.00557585	0.0209591	0.0106956	0	0	0.000310061	0.0691347	0	0.00053927	0	0	0.00741207
k__Bacteria; p__Bacteroidetes; c__Bacteroidia; o__Bacteroidales; f__; g__; s__	315	0.000514711	7.79084	0.02103	9.49652e-05	0.0322539	0.000342402	0	0.00875427	0.00459307	0.00325041	0.129163	0.0165725	0.0224176	0.0141596	0.0144444	0.0130082	0.0034965	0.0138074	0.019132	0.0316213	0	0	0	0	0	0	0	0.00123455	0	0	0	0	0
k__Bacteria; p__Bacteroidetes; c__Bacteroidia; o__Bacteroidales; f__; g__; s__	316	0.575106	#NUM!	0	0.000774589	0	0.0022154	0	0	0	0	0	0	0	0	0	0	0	0	0	0	0.00786297	0	0	0	0	0	0	0	0.00220668	0	0	0	0
k__Bacteria; p__Bacteroidetes; c__Bacteroidia; o__Bacteroidales; f__; g__; s__	317	0.0010873	#NUM!	0	0.00780572	0	0.00984705	0	0	0	0	0	0	0	0	0	0	0	0	0	0	0.0170364	0	0.0353686	0.00356519	0.00272345	0.0149925	0.00713141	0.00288061	0.00441335	0.000269635	0.00815182	0	0.00494138
k__Bacteria; p__Bacteroidetes; c__Bacteroidia; o__Bacteroidales; f__; g__; s__	318	0.000967903	3.03621	0.0286592	0.0034936	0.0204011	0.00849435	0.0464612	0.0700341	0.00648433	0.00722314	0.0272073	0.0193346	0.0356911	0.0131482	0.0225333	0.0625631	0.027972	0.0108487	0.00956602	0.0421617	0	0.0278792	0	0	0	0	0	0.0156376	0	0.000269635	0.00163036	0	0
k__Bacteria; p__Bacteroidetes; c__Bacteroidia; o__Bacteroidales; f__; g__; s__	319	0.16748	#DIV/0!	0.00472433	0	0.0148343	0	0	0	0.0559274	0.00325041	0.000859178	0.000276208	0	0	0	0	0.00582751	0	0	0	0	0	0	0	0	0	0	0	0	0	0	0	0
k__Bacteria; p__Bacteroidetes; c__Bacteroidia; o__Bacteroidales; f__; g__; s__	320	0.16748	#DIV/0!	0.0225458	0	0.0557626	0	0	0	0	0	0	0	0	0.156767	0.000288889	0.151452	0	0.00394497	0.00318867	0	0	0	0	0	0	0	0	0	0	0	0	0	0
k__Bacteria; p__Bacteroidetes; c__Bacteroidia; o__Bacteroidales; f__; g__; s__	321	0.31925	-0.524224	0.00231156	0.00332439	0.00277159	0.00738226	0	0	0	0.00108347	0.00859178	0.00110483	0.00383458	0.00404559	0.000866666	0.00216803	0.0011655	0.00197248	0	0.00752887	0.00393149	0.0111517	0.00261989	0	0	0	0	0.025514	0	0	0	0	0
k__Bacteria; p__Bacteroidetes; c__Bacteroidia; o__Bacteroidales; f__; g__; s__	322	0.011125	#DIV/0!	0.00532295	0	0.00901647	0	0	0	0.00324217	0.000361157	0.0289257	0.0107721	0.000294968	0.0020228	0.0213778	0.00433606	0	0	0.00318867	0	0	0	0	0	0	0	0	0	0	0	0	0	0
k__Bacteria; p__Bacteroidetes; c__Bacteroidia; o__Bacteroidales; f__; g__; s__	323	0.135107	-1.92605	0.00288802	0.0109748	0.00453496	0.036276	0.00387177	0	0.000810541	0	0.000286393	0.00276208	0.0135685	0.0126425	0.00346667	0.00185831	0.0011655	0	0	0	0	0.0111517	0	0	0.000247587	0	0	0.131274	0	0	0	0	0
k__Bacteria; p__Bacteroidetes; c__Bacteroidia; o__Bacteroidales; f__; g__; s__	324	0.0240997	#DIV/0!	0.00475268	0	0.00813898	0	0.0193588	0	0.000810541	0.00108347	0	0.0035907	0.00412955	0.00455129	0	0.0266358	0	0	0.00637735	0	0	0	0	0	0	0	0	0	0	0	0	0	0
k__Bacteria; p__Bacteroidetes; c__Bacteroidia; o__Bacteroidales; f__; g__; s__	325	0.000458554	#DIV/0!	0.0303725	0	0.0359259	0	0.139384	0.0175085	0.00378253	0.00794545	0.0200475	0.0232015	0.00383458	0.00910259	0.0291778	0.029733	0.0675991	0.0315597	0.00318867	0.0391501	0	0	0	0	0	0	0	0	0	0	0	0	0
k__Bacteria; p__Bacteroidetes; c__Bacteroidia; o__Bacteroidales; f__; g__; s__	326	0.600367	-1.50668	0.0017877	0.00507982	0.00230043	0.00840628	0	0	0.00216144	0.00288925	0.00229114	0.00110483	0.00324465	0	0	0.000929155	0	0.00788994	0	0.00451732	0.0013105	0	0.00261989	0	0.00074276	0.0104947	0.00248049	0.00123455	0	0.0223797	0	0.0235398	0.00123535
k__Bacteria; p__Bacteroidetes; c__Bacteroidia; o__Bacteroidales; f__; g__; s__	327	0.0787326	-0.260177	0.00251957	0.0030175	0.0022608	0.0086802	0.00774353	0	0.00189126	0.0050562	0.00315032	0	0.00471949	0.0015171	0.00288889	0.00278747	0.002331	0	0.00318867	0	0	0.00836377	0	0	0	0	0	0.0308637	0	0	0	0	0
k__Bacteria; p__Bacteroidetes; c__Bacteroidia; o__Bacteroidales; f__; g__; s__	328	0.000898693	2.67318	0.0228693	0.00358546	0.0125003	0.00944955	0.0309741	0.0350171	0.00729487	0.0169744	0.0111693	0.0162963	0.0153383	0.0131482	0.0199333	0.0272552	0.0174825	0.0355047	0.0542075	0.0195751	0	0.0334551	0	0	0	0.000249874	0	0.0106994	0.00220668	0	0	0	0
k__Bacteria; p__Bacteroidetes; c__Bacteroidia; o__Bacteroidales; f__; g__; s__	329	0.0341146	#NUM!	0	0.00173948	0	0.00256883	0	0	0	0	0	0	0	0	0	0	0	0	0	0	0	0	0.00785968	0.00594198	0.000247587	0.000749623	0	0.0024691	0.00220668	0	0	0.00313863	0
k__Bacteria; p__Bacteroidetes; c__Bacteroidia; o__Bacteroidales; f__; g__; s__	330	0.0240997	#DIV/0!	0.00115174	0	0.00164615	0	0	0	0	0	0.000286393	0.000828624	0.00176981	0.00505699	0.000288889	0.00371662	0.0011655	0	0	0.00301155	0	0	0	0	0	0	0	0	0	0	0	0	0
k__Bacteria; p__Bacteroidetes; c__Bacteroidia; o__Bacteroidales; f__; g__; s__	331	0.000514711	#DIV/0!	0.0112847	0	0.0137671	0	0	0.00875427	0.00189126	0.00830661	0.00945096	0.00966728	0.0129786	0.00353989	0.0104	0.0566785	0.016317	0.00591745	0.00956602	0.00451732	0	0	0	0	0	0	0	0	0	0	0	0	0
k__Bacteria; p__Bacteroidetes; c__Bacteroidia; o__Bacteroidales; f__; g__; s__	332	0.0118512	-4.32531	0.000101125	0.00202725	0.000309113	0.00244573	0	0	0.00027018	0	0.00114557	0	0	0	0	0	0	0	0	0	0.00262099	0	0.00261989	0.00237679	0.00123793	0.00449774	0.00186037	0	0.00882671	0.00107854	0	0	0.00123535
k__Bacteria; p__Bacteroidetes; c__Bacteroidia; o__Bacteroidales; f__; g__; s__	333	0.000794953	-4.17288	0.0104066	0.187704	0.0187249	0.314923	0.0154871	0.0262628	0.0702469	0.00325041	0.00601425	0.0102197	0.00176981	0	0.00375555	0.00619437	0	0.000986242	0	0.00150577	0.0550408	0.0250913	0.119205	0.108144	0.170835	0.192403	0.0120924	0.02716	0.00882671	0.114325	0.251076	1.20524	0.150712
k__Bacteria; p__Bacteroidetes; c__Bacteroidia; o__Bacteroidales; f__; g__; s__	334	0.00461852	5.37528	0.014591	0.000351532	0.0276255	0.000799133	0	0	0.000540361	0.000361157	0.101097	0.00138104	0.00530942	0.00960829	0.00548889	0.00278747	0.00815851	0.000986242	0.0414528	0.0271039	0	0	0	0	0.00074276	0.00274862	0	0	0	0.00107854	0	0	0
k__Bacteria; p__Bacteroidetes; c__Bacteroidia; o__Bacteroidales; f__; g__; s__	335	0.00221618	#DIV/0!	0.00431611	0	0.00339935	0	0.00774353	0	0.00243162	0.00288925	0.00315032	0.00386691	0.00648929	0.00910259	0.00664444	0.00154859	0.00699301	0	0.00956602	0	0	0	0	0	0	0	0	0	0	0	0	0	0
k__Bacteria; p__Bacteroidetes; c__Bacteroidia; o__Bacteroidales; f__; g__; s__	336	0.00403061	3.72657	0.0141944	0.00107228	0.0252615	0.00386615	0	0.0262628	0.00189126	0.00144463	0.0979463	0.0129818	0.00117987	0.00960829	0.0138667	0.00185831	0.00582751	0.0138074	0	0.0120462	0	0.0139396	0	0	0	0	0	0	0	0	0	0	0
k__Bacteria; p__Bacteroidetes; c__Bacteroidia; o__Bacteroidales; f__; g__; s__	337	0.600367	#DIV/0!	0.000593874	0	0.00167767	0	0	0	0	0	0.00229114	0	0	0	0	0	0	0	0	0.0060231	0	0	0	0	0	0	0	0	0	0	0	0	0
k__Bacteria; p__Bacteroidetes; c__Bacteroidia; o__Bacteroidales; f__; g__; s__	338	0.000898693	4.54753	0.00842155	0.000360121	0.00814265	0.000859137	0.00774353	0.0175085	0.00027018	0.000722314	0.00801899	0.00607658	0.00442452	0.00707979	0.00288889	0.0306621	0.00815851	0.0138074	0	0.0105404	0	0.00278792	0	0	0.000247587	0	0	0.00164606	0	0	0	0	0
k__Bacteria; p__Bacteroidetes; c__Bacteroidia; o__Bacteroidales; f__; g__; s__	339	0.00575111	0.73733	0.0155805	0.00934593	0.0112578	0.0246527	0.00774353	0.0175085	0.00324217	0.00650082	0.0272073	0.0455743	0.00943897	0.0207337	0.0179111	0.019822	0.0151515	0.000986242	0.0127547	0.013552	0	0.0836377	0	0	0	0	0	0.0378595	0	0	0	0	0
k__Bacteria; p__Bacteroidetes; c__Bacteroidia; o__Bacteroidales; f__; g__; s__	340	0.0939245	#DIV/0!	0.00592821	0	0.0162439	0	0	0.00875427	0	0	0	0.061042	0	0.000505699	0.000866666	0.0108401	0	0.000986242	0	0	0	0	0	0	0	0	0	0	0	0	0	0	0
k__Bacteria; p__Bacteroidetes; c__Bacteroidia; o__Bacteroidales; f__; g__; s__	341	0.00959346	5.92807	0.003087	5.07002e-05	0.00467397	0.000128202	0.00387177	0	0.00216144	0	0.00171836	0.0151914	0.00176981	0.0015171	0.00346667	0.000309718	0.0011655	0	0	0.0120462	0	0	0	0	0.000247587	0	0	0.000411516	0	0	0	0	0
k__Bacteria; p__Bacteroidetes; c__Bacteroidia; o__Bacteroidales; f__; g__; s__	342	0.00349216	4.65691	0.0171957	0.000681633	0.023097	0.00231005	0.00774353	0	0.00486325	0.000361157	0.00343671	0.0325925	0.00324465	0.0121368	0.0416	0.00371662	0.00582751	0.0710094	0	0.0542079	0	0.00836377	0	0	0.000247587	0.000249874	0	0	0	0	0	0	0
k__Bacteria; p__Bacteroidetes; c__Bacteroidia; o__Bacteroidales; f__; g__; s__	343	0.0492719	#DIV/0!	0.0158855	0	0.0247293	0	0	0	0.00621415	0	0.0277801	0.013258	0	0.0505699	0.0739555	0.000929155	0	0	0	0.0496906	0	0	0	0	0	0	0	0	0	0	0	0	0
k__Bacteria; p__Bacteroidetes; c__Bacteroidia; o__Bacteroidales; f__; g__; s__	344	0.0492719	#DIV/0!	0.00315739	0	0.00526395	0	0	0	0	0	0.00973735	0.000828624	0	0.000505699	0.0150222	0.00185831	0.0034965	0	0.0127547	0	0	0	0	0	0	0	0	0	0	0	0	0	0
k__Bacteria; p__Bacteroidetes; c__Bacteroidia; o__Bacteroidales; f__; g__; s__	345	0.731306	-0.767981	0.00132033	0.00224837	0.0013045	0.00368009	0	0	0.000810541	0.000361157	0.00200475	0.000828624	0.000884904	0.000505699	0.00173333	0.00154859	0.002331	0.00295873	0	0.00451732	0.00262099	0.0139396	0.00130995	0.0011884	0	0.000999498	0	0.0024691	0	0.00134817	0.00326073	0.00209242	0
k__Bacteria; p__Bacteroidetes; c__Bacteroidia; o__Bacteroidales; f__; g__; s__	346	0.00647832	7.79972	0.00462151	2.07411e-05	0.00701159	7.47832e-05	0	0	0.00189126	0.000361157	0.0040095	0.00828624	0.00235974	0.000505699	0.00866666	0.0263261	0	0.00591745	0.00637735	0	0	0	0	0	0	0	0	0	0	0.000269635	0	0	0
k__Bacteria; p__Bacteroidetes; c__Bacteroidia; o__Bacteroidales; f__; g__; s__	347	0.0186506	-0.0460492	0.0105404	0.0108823	0.00963419	0.0310834	0.0154871	0	0.00243162	0.000722314	0.00658703	0.00386691	0.0112088	0.00556269	0.0277333	0.0275649	0.0151515	0.00591745	0.0223207	0.00301155	0	0.111517	0.00130995	0	0.000247587	0.00124937	0	0.026337	0	0.000808904	0	0	0
k__Bacteria; p__Bacteroidetes; c__Bacteroidia; o__Bacteroidales; f__; g__; s__	348	0.786803	#NUM!	0	6.33101e-05	0	0.000228268	0	0	0	0	0	0	0	0	0	0	0	0	0	0	0	0	0	0	0	0	0	0.000823032	0	0	0	0	0
k__Bacteria; p__Bacteroidetes; c__Bacteroidia; o__Bacteroidales; f__; g__; s__	349	1	#DIV/0!	0	0	0	0	0	0	0	0	0	0	0	0	0	0	0	0	0	0	0	0	0	0	0	0	0	0	0	0	0	0	0
k__Bacteria; p__Bacteroidetes; c__Bacteroidia; o__Bacteroidales; f__; g__; s__	350	0.190108	2.19693	0.000870837	0.00018993	0.00162045	0.000684804	0	0	0	0	0.000572785	0.000276208	0.00560439	0.0030342	0.00115556	0.00154859	0	0	0	0	0	0	0	0	0	0	0	0.0024691	0	0	0	0	0
k__Bacteria; p__Bacteroidetes; c__Bacteroidia; o__Bacteroidales; f__; g__; s__	351	0.786803	-1.07996	0.000358126	0.00075707	0.000471811	0.00117339	0	0	0	0.000361157	0.000859178	0.000828624	0.00117987	0	0	0.000619437	0.0011655	0	0	0	0	0	0	0	0.00148552	0.000749623	0	0.00205758	0	0.00188744	0	0.00366174	0
k__Bacteria; p__Bacteroidetes; c__Bacteroidia; o__Bacteroidales; f__; g__; s__	352	0.600367	#DIV/0!	0.0011237	0	0.00405153	0	0	0	0.000540361	0	0	0.0151914	0	0	0	0	0	0	0	0	0	0	0	0	0	0	0	0	0	0	0	0	0
k__Bacteria; p__Bacteroidetes; c__Bacteroidia; o__Bacteroidales; f__; g__; s__	353	0.051879	-3.19169	0.000746581	0.00682137	0.00159163	0.00920188	0	0	0	0	0.00229114	0.000552416	0.000294968	0	0.000866666	0.000619437	0.00582751	0	0	0	0.00917347	0.00278792	0.00523979	0.0285215	0.000990347	0.00499749	0.00372073	0	0	0.00970685	0	0.0235398	0
k__Bacteria; p__Bacteroidetes; c__Bacteroidia; o__Bacteroidales; f__; g__; s__	354	0.0240997	#DIV/0!	0.00658434	0	0.00898867	0	0	0	0.000540361	0	0	0.0204394	0.00176981	0.0176995	0.00404444	0.00929155	0.025641	0	0.0127547	0	0	0	0	0	0	0	0	0	0	0	0	0	0
k__Bacteria; p__Bacteroidetes; c__Bacteroidia; o__Bacteroidales; f__; g__; s__	355	0.000514711	10.02	0.0197747	1.90451e-05	0.0223401	6.86682e-05	0	0.00875427	0.00594397	0.00216694	0.040095	0.00911486	0.0401156	0.000505699	0.0109778	0.0247775	0.0151515	0.0236698	0.0127547	0.0828176	0	0	0	0	0.000247587	0	0	0	0	0	0	0	0
k__Bacteria; p__Bacteroidetes; c__Bacteroidia; o__Bacteroidales; f__; g__; s__	356	0.000514711	#DIV/0!	0.0166553	0	0.0166078	0	0.06582	0	0.0143196	0.00108347	0.0111693	0.0179535	0.0147484	0.00505699	0.0153111	0.0117693	0.0011655	0.0236698	0.0255094	0.0255982	0	0	0	0	0	0	0	0	0	0	0	0	0
k__Bacteria; p__Bacteroidetes; c__Bacteroidia; o__Bacteroidales; f__; g__; s__	357	0.00737679	5.6189	0.00155561	3.16551e-05	0.0018084	0.000114134	0	0	0.000810541	0.000361157	0	0.00110483	0.00530942	0.0020228	0.000577778	0.000619437	0.0034965	0.00295873	0	0.00451732	0	0	0	0	0	0	0	0.000411516	0	0	0	0	0
k__Bacteria; p__Bacteroidetes; c__Bacteroidia; o__Bacteroidales; f__; g__; s__	358	0.011125	#DIV/0!	0.0050267	0	0.0061884	0	0.00387177	0	0	0	0.00114557	0.00994349	0.00294968	0.00657409	0.0161778	0	0.004662	0.00591745	0.019132	0	0	0	0	0	0	0	0	0	0	0	0	0	0
k__Bacteria; p__Bacteroidetes; c__Bacteroidia; o__Bacteroidales; f__; g__; s__	359	0.00221618	#DIV/0!	0.00354573	0	0.00286478	0	0	0	0.00027018	0.00433388	0.000572785	0.00801003	0.00589936	0.00455129	0.00346667	0.00557493	0.00699301	0.00394497	0	0.0060231	0	0	0	0	0	0	0	0	0	0	0	0	0
k__Bacteria; p__Bacteroidetes; c__Bacteroidia; o__Bacteroidales; f__; g__; s__	360	0.31925	-0.315211	0.00155129	0.0019301	0.00270183	0.00540507	0.00387177	0	0.00027018	0	0.00945096	0.000276208	0.00117987	0	0	0	0.0011655	0.000986242	0	0.00451732	0	0.0195155	0.00392984	0	0	0	0	0.00164606	0	0	0	0	0
k__Bacteria; p__Bacteroidetes; c__Bacteroidia; o__Bacteroidales; f__; g__; s__	361	0.2764	#DIV/0!	0.00204849	0	0.00489338	0	0	0	0	0	0.000286393	0.00801003	0	0.0171938	0	0	0	0	0.00318867	0	0	0	0	0	0	0	0	0	0	0	0	0	0
k__Bacteria; p__Bacteroidetes; c__Bacteroidia; o__Bacteroidales; f__; g__; s__	362	0.174404	-2.90322	0.00042844	0.00320514	0.000587257	0.00412011	0	0	0.000810541	0.00108347	0.00143196	0.000828624	0.000294968	0	0	0.00154859	0	0	0	0	0.00524198	0	0.00392984	0.00713038	0.000247587	0	0.000930184	0.00617274	0.00441335	0	0	0.0136007	0
k__Bacteria; p__Bacteroidetes; c__Bacteroidia; o__Bacteroidales; f__; g__; s__	363	0.00502736	#DIV/0!	0.00381409	0	0.00390866	0	0	0	0	0.000722314	0	0.00994349	0.00147484	0.0015171	0.00895555	0.00929155	0.00815851	0.00394497	0.00637735	0.00301155	0	0	0	0	0	0	0	0	0	0	0	0	0
k__Bacteria; p__Bacteroidetes; c__Bacteroidia; o__Bacteroidales; f__; g__; s__	364	0.913955	-2.34425	0.000450856	0.00228943	0.00160565	0.00618953	0	0	0	0	0	0	0	0	0.000288889	0	0	0	0	0.0060231	0	0.00836377	0	0	0	0	0	0.0213988	0	0	0	0	0
k__Bacteria; p__Bacteroidetes; c__Bacteroidia; o__Bacteroidales; f__; g__; s__	365	0.0240997	#DIV/0!	0.00117168	0	0.00187914	0	0	0	0.000810541	0.000722314	0.000286393	0.00635278	0.000589936	0	0.00346667	0	0	0.000986242	0.00318867	0	0	0	0	0	0	0	0	0	0	0	0	0	0
k__Bacteria; p__Bacteroidetes; c__Bacteroidia; o__Bacteroidales; f__; g__; s__	366	0.2764	#DIV/0!	0.00104609	0	0.00219003	0	0	0	0.00108072	0	0.00515507	0	0	0	0	0	0	0.00690369	0	0.00150577	0	0	0	0	0	0	0	0	0	0	0	0	0
k__Bacteria; p__Bacteroidetes; c__Bacteroidia; o__Bacteroidales; f__; g__; s__	367	0.0712928	2.48764	0.00491817	0.000876898	0.00771752	0.0016771	0	0	0.00108072	0	0.00257753	0.00718141	0.00796413	0.0025285	0.00722222	0.0291135	0.0011655	0.000986242	0	0.00903465	0.00393149	0	0	0	0	0.000249874	0	0.00205758	0	0.000269635	0.00489109	0	0
k__Bacteria; p__Bacteroidetes; c__Bacteroidia; o__Bacteroidales; f__; g__; s__	368	0.000967903	#DIV/0!	0.0384214	0	0.044222	0	0.147127	0.0437713	0.0148599	0.00577851	0.00257753	0.0599371	0.0793464	0.041973	0.0234	0.0984904	0	0	0.019132	0.00150577	0	0	0	0	0	0	0	0	0	0	0	0	0
k__Bacteria; p__Bacteroidetes; c__Bacteroidia; o__Bacteroidales; f__; g__; s__	369	0.0240997	#DIV/0!	0.0107045	0	0.0336208	0	0	0	0.00027018	0	0	0.000552416	0.00589936	0.000505699	0.127111	0	0.00932401	0	0.00318867	0.00301155	0	0	0	0	0	0	0	0	0	0	0	0	0
k__Bacteria; p__Bacteroidetes; c__Bacteroidia; o__Bacteroidales; f__; g__; s__	370	0.00502736	#DIV/0!	0.0063819	0	0.00849831	0	0	0	0.00243162	0.0050562	0.000859178	0.0273446	0	0.00960829	0.000288889	0.00185831	0.0104895	0.0118349	0	0.0195751	0	0	0	0	0	0	0	0	0	0	0	0	0
k__Bacteria; p__Bacteroidetes; c__Bacteroidia; o__Bacteroidales; f__; g__; s__	371	0.0919693	2.59526	0.0028708	0.000475064	0.00475653	0.00104823	0	0.0175085	0.00027018	0	0.00143196	0.00138104	0.00176981	0.0030342	0.00231111	0.00495549	0	0	0	0.00752887	0	0	0	0	0	0.00124937	0	0.000411516	0	0.000808904	0	0	0.00370604
k__Bacteria; p__Bacteroidetes; c__Bacteroidia; o__Bacteroidales; f__; g__; s__	372	0.0919693	0.863866	0.00618547	0.00339878	0.0106625	0.00933706	0.00387177	0	0.00999668	0.000722314	0.00544146	0.00441933	0.000589936	0.0020228	0.00433333	0.0415023	0.004662	0	0	0.00903465	0.0340729	0	0	0	0.00074276	0.000249874	0.000930184	0.00452667	0	0	0	0.00366174	0
k__Bacteria; p__Bacteroidetes; c__Bacteroidia; o__Bacteroidales; f__; g__; s__	373	0.239594	4.6629	0.000525418	2.07411e-05	0.00107359	7.47832e-05	0.00387177	0	0	0	0.000286393	0.00138104	0	0	0.000577778	0.00123887	0	0	0	0	0	0	0	0	0	0	0	0	0	0.000269635	0	0	0
k__Bacteria; p__Bacteroidetes; c__Bacteroidia; o__Bacteroidales; f__; g__; s__	374	0.0240997	#DIV/0!	0.00264186	0	0.00380653	0	0	0	0.00324217	0.000722314	0	0.00828624	0	0.0010114	0.00288889	0	0.0034965	0.0128211	0	0.00451732	0	0	0	0	0	0	0	0	0	0	0	0	0
k__Bacteria; p__Bacteroidetes; c__Bacteroidia; o__Bacteroidales; f__; g__; s__	375	0.0492719	#DIV/0!	0.00230983	0	0.00523611	0	0	0	0	0.00144463	0	0.00248587	0.00206477	0.0010114	0.000577778	0.019822	0	0.00493121	0	0	0	0	0	0	0	0	0	0	0	0	0	0	0
k__Bacteria; p__Bacteroidetes; c__Bacteroidia; o__Bacteroidales; f__; g__; s__	376	0.00647832	#NUM!	0	0.0108259	0	0.0257598	0	0	0	0	0	0	0	0	0	0	0	0	0	0	0.0956662	0	0.00785968	0.00831878	0	0.00274862	0.00713141	0	0.00220668	0.00242671	0.00326073	0	0.0111181
k__Bacteria; p__Bacteroidetes; c__Bacteroidia; o__Bacteroidales; f__; g__; s__	377	0.00502736	#DIV/0!	0.00344905	0	0.00403104	0	0	0	0.000540361	0.00144463	0.00315032	0.013258	0.00530942	0.0030342	0.00375555	0.00278747	0.0104895	0	0	0.00451732	0	0	0	0	0	0	0	0	0	0	0	0	0
k__Bacteria; p__Bacteroidetes; c__Bacteroidia; o__Bacteroidales; f__; g__; s__	378	0.0492719	#DIV/0!	0.0119397	0	0.0209708	0	0	0	0	0.000361157	0	0.0138104	0.000589936	0	0.0439111	0	0.0571096	0	0.00318867	0.0481848	0	0	0	0	0	0	0	0	0	0	0	0	0
k__Bacteria; p__Bacteroidetes; c__Bacteroidia; o__Bacteroidales; f__; g__; s__	379	0.798659	#DIV/0!	0.00668818	0	0.0250249	0	0	0	0	0	0	0.0936345	0	0	0	0	0	0	0	0	0	0	0	0	0	0	0	0	0	0	0	0	0
k__Bacteria; p__Bacteroidetes; c__Bacteroidia; o__Bacteroidales; f__; g__; s__	380	0.422404	#DIV/0!	0.000379428	0	0.000983451	0	0	0	0	0	0	0	0	0	0	0.000309718	0.0034965	0	0	0.00150577	0	0	0	0	0	0	0	0	0	0	0	0	0
k__Bacteria; p__Bacteroidetes; c__Bacteroidia; o__Bacteroidales; f__; g__; s__	381	0.00502736	#DIV/0!	0.00220751	0	0.0025602	0	0	0.00875427	0.000810541	0.000361157	0.00315032	0.000828624	0.00324465	0.00455129	0.00491111	0.00278747	0	0	0	0.00150577	0	0	0	0	0	0	0	0	0	0	0	0	0
k__Bacteria; p__Bacteroidetes; c__Bacteroidia; o__Bacteroidales; f__; g__; s__	382	0.000514711	8.83855	0.0109188	2.38509e-05	0.00836854	8.59955e-05	0.0154871	0	0.0013509	0.0050562	0.00945096	0.0135342	0.0259572	0.0106197	0.00808889	0.0130082	0.002331	0.00493121	0.0159434	0.0271039	0	0	0	0	0	0	0.000310061	0	0	0	0	0	0
k__Bacteria; p__Bacteroidetes; c__Bacteroidia; o__Bacteroidales; f__; g__; s__	383	0.0341146	6.16357	0.00136522	1.90451e-05	0.0024878	6.86682e-05	0	0	0	0	0.000286393	0.000828624	0.000294968	0.0015171	0.00173333	0.00929155	0	0.00197248	0.00318867	0	0	0	0	0	0.000247587	0	0	0	0	0	0	0	0
k__Bacteria; p__Bacteroidetes; c__Bacteroidia; o__Bacteroidales; f__; g__; s__	384	0.047746	3.46232	0.00100758	9.14151e-05	0.00123175	0.000329602	0	0	0	0	0.000859178	0.000276208	0	0.0015171	0.00375555	0.00154859	0.0011655	0.00197248	0	0.00301155	0	0	0	0.0011884	0	0	0	0	0	0	0	0	0
k__Bacteria; p__Bacteroidetes; c__Bacteroidia; o__Bacteroidales; f__[Paraprevotellaceae]; g__; s__	385	0.00403061	-1.19677	0.0186005	0.0426373	0.019255	0.017811	0.00387177	0.00875427	0.0378253	0.0101124	0.0756077	0.0127056	0.00560439	0.0126425	0.0187778	0.00185831	0.0174825	0.00591745	0.019132	0.0301155	0.0340729	0.0111517	0.0471581	0.0285215	0.0495173	0.0467265	0.0437186	0.038271	0.0463402	0.0213011	0.0489109	0.0533568	0.0852389
k__Bacteria; p__Bacteroidetes; c__Bacteroidia; o__Bacteroidales; f__[Paraprevotellaceae]; g__; s__	386	0.000967903	#DIV/0!	0.0103595	0	0.0184087	0	0	0	0.0343129	0.000722314	0.00572785	0.00165725	0.000884904	0.0020228	0.00635555	0.00278747	0.013986	0.00394497	0.00637735	0.0662541	0	0	0	0	0	0	0	0	0	0	0	0	0
k__Bacteria; p__Bacteroidetes; c__Bacteroidia; o__Bacteroidales; f__[Paraprevotellaceae]; g__; s__	387	0.0010873	8.76496	0.00836171	1.92211e-05	0.00739052	6.93027e-05	0.00774353	0.00875427	0	0.00288925	0.0037231	0.0174011	0	0.00404559	0.0078	0.0182734	0.0104895	0.00591745	0.0255094	0.00451732	0	0	0	0	0	0.000249874	0	0	0	0	0	0	0
k__Bacteria; p__Bacteroidetes; c__Bacteroidia; o__Bacteroidales; f__[Paraprevotellaceae]; g__; s__	388	0.365528	-3.77797	0.000106959	0.00146723	0.000185202	0.00321443	0	0	0	0.000361157	0	0.000552416	0.000294968	0	0.000288889	0	0	0	0	0	0.0013105	0	0	0	0.00470415	0.0112443	0.000310061	0	0	0.000269635	0	0	0.00123535
k__Bacteria; p__Bacteroidetes; c__Bacteroidia; o__Bacteroidales; f__[Paraprevotellaceae]; g__; s__	389	0.00176889	4.30181	0.0257874	0.00130747	0.0615947	0.00463375	0.00774353	0.236365	0.00918614	0.00541735	0.00458228	0.000552416	0.0244823	0	0.00144444	0.0405731	0.011655	0.0128211	0.00318867	0.00301155	0	0.0167275	0	0	0	0	0	0	0	0.000269635	0	0	0
k__Bacteria; p__Bacteroidetes; c__Bacteroidia; o__Bacteroidales; f__[Paraprevotellaceae]; g__; s__	390	0.00288348	2.96319	0.00970765	0.00124481	0.00993909	0.00304059	0.00387177	0.0350171	0.00243162	0	0.0209067	0.00276208	0.0162232	0.0030342	0.000288889	0.00898183	0.004662	0.00690369	0.0127547	0.0180693	0	0.00836377	0	0	0	0	0	0.0078188	0	0	0	0	0
k__Bacteria; p__Bacteroidetes; c__Bacteroidia; o__Bacteroidales; f__[Paraprevotellaceae]; g__; s__	391	0.113613	0.204682	0.0310323	0.0269276	0.0385143	0.0526833	0.0116153	0	0.0316111	0.0306983	0.00859178	0.0254111	0.0286119	0.148676	0.0580666	0.0083624	0.025641	0.00295873	0	0.0542079	0.0943557	0.0947894	0.00130995	0.0011884	0.000495173	0	0.000310061	0.157611	0	0	0	0	0
k__Bacteria; p__Bacteroidetes; c__Bacteroidia; o__Bacteroidales; f__[Paraprevotellaceae]; g__; s__	392	0.00461852	-5.27767	0.000102549	0.00397801	0.000314296	0.00343243	0	0	0.00027018	0	0	0	0	0	0	0	0.0011655	0	0	0	0.010484	0	0.00261989	0.00356519	0.00544691	0.00699648	0.000930184	0.00329213	0	0.00647124	0.00326073	0	0.00864742
k__Bacteria; p__Bacteroidetes; c__Bacteroidia; o__Bacteroidales; f__[Paraprevotellaceae]; g__; s__	393	0.000794953	-6.22126	0.000552926	0.0412528	0.0011726	0.0312041	0.00387177	0	0.000810541	0	0.000572785	0.00248587	0	0	0	0	0	0	0	0	0.0262099	0	0.0707371	0.0166376	0.0648677	0.0267366	0.0635625	0.0024691	0.0728204	0.100035	0.0472806	0.0350481	0.00988277
k__Bacteria; p__Bacteroidetes; c__Bacteroidia; o__Bacteroidales; f__[Paraprevotellaceae]; g__; s__	394	0.0428566	-1.60718	0.0360126	0.109715	0.021671	0.08346	0.0232306	0	0.0218846	0.0664529	0.054701	0.0334212	0.0758067	0.052087	0.0291778	0.0238483	0.0547786	0.0118349	0.0223207	0.0346328	0.142844	0.0223034	0.0838366	0.0950717	0.0316911	0.0154922	0.277505	0.135389	0.229494	0.0172566	0.166297	0.059634	0.149477
k__Bacteria; p__Bacteroidetes; c__Bacteroidia; o__Bacteroidales; f__[Paraprevotellaceae]; g__; s__	395	0.296935	0.684963	0.00886309	0.00551303	0.0133805	0.0111749	0.00774353	0	0.00891595	0.00686198	0.00200475	0	0.00206477	0.0384331	0.00664444	0	0.00582751	0.00493121	0	0.0406559	0.013105	0.0111517	0	0.00831878	0	0	0	0.039094	0	0	0	0	0
k__Bacteria; p__Bacteroidetes; c__Bacteroidia; o__Bacteroidales; f__[Paraprevotellaceae]; g__; s__	396	0.22369	-1.75098	0.00101944	0.00343129	0.00182823	0.0123717	0	0	0.00513343	0.000361157	0	0.000552416	0	0.000505699	0.00462222	0.00309718	0	0	0	0	0	0.0446068	0	0	0	0	0	0	0	0	0	0	0
k__Bacteria; p__Bacteroidetes; c__Bacteroidia; o__Bacteroidales; f__[Paraprevotellaceae]; g__; s__	397	0.00737679	1.23336	0.0371976	0.0158211	0.0456668	0.0436496	0.178101	0	0.00351235	0.0198636	0.0581377	0.00828624	0.0262521	0.0257907	0.0465111	0.0526521	0.0606061	0.0108487	0.0286981	0.00150577	0	0.153336	0.00130995	0	0	0	0	0.051028	0	0	0	0	0
k__Bacteria; p__Bacteroidetes; c__Bacteroidia; o__Bacteroidales; f__[Paraprevotellaceae]; g__; s__	398	0.00840891	1.59957	0.0517464	0.0170751	0.0589618	0.0375493	0.050333	0.12256	0.0202635	0.00361157	0.138041	0.0762334	0.0165182	0.0010114	0.190378	0.0473869	0.0198135	0.00295873	0.0127547	0.0225866	0	0.0334551	0	0	0.000247587	0	0	0.124689	0	0	0.0635842	0	0
k__Bacteria; p__Bacteroidetes; c__Bacteroidia; o__Bacteroidales; f__[Paraprevotellaceae]; g__; s__	399	0.000666541	-8.25677	0.000367289	0.112342	0.00104221	0.0696276	0	0	0	0	0	0.00386691	0	0	0.000288889	0	0	0.000986242	0	0	0.0825612	0	0.0825266	0.0522894	0.189404	0.15967	0.190688	0.00288061	0.158881	0.180655	0.0831486	0.0899742	0.187773
k__Bacteria; p__Bacteroidetes; c__Bacteroidia; o__Bacteroidales; f__[Paraprevotellaceae]; g__; s__	400	0.786803	#NUM!	0	4.77017e-05	0	0.000171991	0	0	0	0	0	0	0	0	0	0	0	0	0	0	0	0	0	0	0	0	0.000620122	0	0	0	0	0	0
k__Bacteria; p__Bacteroidetes; c__Bacteroidia; o__Bacteroidales; f__[Paraprevotellaceae]; g__; s__	401	0.2764	#DIV/0!	0.00832935	0	0.0232475	0	0	0	0	0	0	0	0	0	0.0846444	0.000309718	0	0.00295873	0.0286981	0	0	0	0	0	0	0	0	0	0	0	0	0	0
k__Bacteria; p__Bacteroidetes; c__Bacteroidia; o__Bacteroidales; f__[Paraprevotellaceae]; g__[Prevotella]; s__	402	0.385692	-1.29261	0.011244	0.0275446	0.0116864	0.029571	0.00387177	0.00875427	0.00567379	0.00361157	0.00601425	0.0102197	0.00648929	0.0318591	0.0104	0.000929155	0.02331	0.00394497	0.00318867	0.0391501	0.0288309	0.0111517	0.0615675	0.0297099	0.00148552	0.0699648	0.0120924	0.0292176	0	0	0.0913004	0.000523106	0.0222362
k__Bacteria; p__Bacteroidetes; c__Bacteroidia; o__Bacteroidales; f__[Paraprevotellaceae]; g__[Prevotella]; s__	403	0.41171	-1.67286	0.00211256	0.00673582	0.00192684	0.00818694	0.00387177	0	0.00108072	0.00144463	0.00200475	0.00248587	0.00176981	0.00455129	0.00202222	0	0.00582751	0	0	0.00451732	0.0144155	0	0.0157194	0.00475359	0	0.021989	0.00248049	0.00617274	0	0	0.0195644	0	0.00247069
k__Bacteria; p__Bacteroidetes; c__Bacteroidia; o__Bacteroidales; f__[Paraprevotellaceae]; g__[Prevotella]; s__	404	0.174404	-1.73813	0.000856657	0.00285783	0.00178842	0.00479581	0	0	0.00027018	0	0.000859178	0	0	0	0.000288889	0.00123887	0	0.00295873	0.00637735	0	0	0	0	0.0011884	0.000495173	0.000749623	0.00155031	0.00288061	0.0154467	0	0.00163036	0.00209242	0.0111181
k__Bacteria; p__Bacteroidetes; c__Bacteroidia; o__Bacteroidales; f__[Paraprevotellaceae]; g__CF231; s__	405	0.000967903	2.24186	0.0293707	0.00620935	0.0248374	0.0206948	0.0116153	0.0437713	0.0097265	0.0390049	0.016038	0.0803765	0.0772816	0.00960829	0.0170444	0.0396439	0.0104895	0.0138074	0.0382641	0.00451732	0	0.00557585	0	0	0	0.000249874	0	0.0748959	0	0	0	0	0
k__Bacteria; p__Bacteroidetes; c__Bacteroidia; o__Bacteroidales; f__[Paraprevotellaceae]; g__CF231; s__	406	0.000898693	2.95965	0.282356	0.0362956	0.214547	0.105123	0.185845	0.0787884	0.061331	0.234752	0.344244	0.32924	0.887263	0.289766	0.363711	0.510106	0.138695	0.15484	0.261471	0.112933	0	0.381945	0.0130995	0	0.000247587	0.000749623	0	0.0584353	0	0.00053927	0.0163036	0.000523106	0
k__Bacteria; p__Bacteroidetes; c__Bacteroidia; o__Bacteroidales; f__[Paraprevotellaceae]; g__CF231; s__	407	0.051879	4.28632	0.0142063	0.000728067	0.0306937	0.00262508	0	0	0.00945632	0.000361157	0.0148924	0.00165725	0.0292018	0	0.1144	0.000309718	0	0	0	0.0286097	0	0	0	0	0	0	0	0.00946486	0	0	0	0	0
k__Bacteria; p__Bacteroidetes; c__Bacteroidia; o__Bacteroidales; f__[Paraprevotellaceae]; g__CF231; s__	408	0.00575111	1.80193	0.0223074	0.00639758	0.0138419	0.0108462	0.00774353	0.0175085	0.0235057	0.00541735	0.0220522	0.0196108	0.0162232	0.04703	0.0540222	0.0325204	0.0221445	0.0197248	0.0127547	0.0120462	0.0340729	0.0139396	0.00523979	0	0.000247587	0.0227386	0.000310061	0	0.00662003	0	0	0	0
k__Bacteria; p__Bacteroidetes; c__Bacteroidia; o__Bacteroidales; f__[Paraprevotellaceae]; g__CF231; s__	409	0.0614995	-1.29196	0.0137743	0.033728	0.0176326	0.100031	0	0	0.00243162	0.013724	0.00171836	0.0381167	0.0115037	0.0581554	0.00346667	0.0192025	0.032634	0.00887618	0	0.00301155	0	0.0780618	0.00130995	0	0	0.000249874	0	0.358842	0	0	0	0	0
k__Bacteria; p__Bacteroidetes; c__Bacteroidia; o__Bacteroidales; f__[Paraprevotellaceae]; g__CF231; s__	410	0.174404	0.0105705	0.0713804	0.0708594	0.0494684	0.111856	0.0890506	0.113805	0.00891595	0.0278091	0.0939368	0.0806527	0.0235974	0.0313534	0.0268667	0.0672089	0.0477855	0.0759406	0.12117	0.191233	0	0.0641222	0.100866	0.0724922	0.0111414	0.00674661	0.224794	0.378183	0.0220668	0	0.0407591	0	0
k__Bacteria; p__Bacteroidetes; c__Bacteroidia; o__Bacteroidales; f__[Paraprevotellaceae]; g__CF231; s__	411	0.731306	0.613944	0.0333797	0.0218106	0.0314163	0.0122373	0.00387177	0	0.0894297	0.00144463	0.0489731	0.0229253	0.0156333	0.0799005	0.052	0.0238483	0.0268065	0.0147936	0.00637735	0.0813118	0.0458674	0.0195155	0.0196492	0.0225795	0.00396139	0.017991	0.0164332	0.0337443	0.0375135	0.00323562	0.0293466	0.0151701	0.0185302
k__Bacteria; p__Bacteroidetes; c__Bacteroidia; o__Bacteroidales; f__[Paraprevotellaceae]; g__CF231; s__	412	0.786803	-1.03066	0.0101429	0.0207216	0.0154821	0.0366632	0	0	0.0297198	0.00361157	0.0189019	0	0	0.000505699	0.0153111	0	0.016317	0.00493121	0	0.0527021	0.119255	0.00278792	0	0.0736806	0.000247587	0	0.00372073	0.0106994	0.0198601	0	0.0391287	0	0
k__Bacteria; p__Bacteroidetes; c__Bacteroidia; o__Bacteroidales; f__[Paraprevotellaceae]; g__CF231; s__	413	0.00903911	-0.195004	0.0143753	0.0164558	0.0128964	0.0546734	0.00774353	0.0350171	0.0240461	0.00433388	0.00114557	0.0323163	0.00884904	0.00910259	0.00577778	0.0278747	0.011655	0	0.0318867	0.00150577	0	0.197943	0.00130995	0	0	0	0	0.0144031	0	0.000269635	0	0	0
k__Bacteria; p__Bacteroidetes; c__Bacteroidia; o__Bacteroidales; f__[Paraprevotellaceae]; g__CF231; s__	414	0.00305382	-3.20705	0.00641801	0.059268	0.0120332	0.0818543	0.0232306	0	0.0162108	0.00108347	0.000572785	0.000552416	0	0.000505699	0.0404444	0.00278747	0	0.00295873	0	0.00150577	0.0471778	0.0139396	0.0864565	0.128347	0.00272345	0.00424787	0.0232546	0.0407401	0.0286868	0.00134817	0.296726	0.00418484	0.0926509
k__Bacteria; p__Bacteroidetes; c__Bacteroidia; o__Bacteroidales; f__[Paraprevotellaceae]; g__CF231; s__	415	0.00575111	0.604849	0.0911787	0.0599537	0.0755573	0.169222	0.0735636	0.0262628	0.0218846	0.0386438	0.0893545	0.144733	0.0430653	0.315556	0.1352	0.118003	0.0664336	0.0798856	0.0892829	0.0346328	0	0.175639	0.00392984	0	0	0.000249874	0	0.599579	0	0	0	0	0
k__Bacteria; p__Bacteroidetes; c__Bacteroidia; o__Bacteroidales; f__[Paraprevotellaceae]; g__CF231; s__	416	0.0939245	#DIV/0!	0.00198564	0	0.00440078	0	0	0	0	0	0.000286393	0	0.00383458	0	0.000577778	0.0164151	0.0034965	0	0.00318867	0	0	0	0	0	0	0	0	0	0	0	0	0	0
k__Bacteria; p__Bacteroidetes; c__Bacteroidia; o__Bacteroidales; f__[Paraprevotellaceae]; g__CF231; s__	417	0.000551991	4.67497	0.0379716	0.00148646	0.0467048	0.0042091	0.17423	0.00875427	0.0875385	0.0187802	0.048114	0.0196108	0.0109138	0.00556269	0.0546	0.00278747	0.034965	0.00197248	0.00956602	0.0542079	0	0.00278792	0.00130995	0	0	0	0	0.0152261	0	0	0	0	0
k__Bacteria; p__Bacteroidetes; c__Bacteroidia; o__Bacteroidales; f__[Paraprevotellaceae]; g__CF231; s__	418	0.000458554	4.74842	0.0386619	0.00143835	0.0223778	0.00348806	0.0348459	0.0175085	0.00513343	0.0332264	0.0186155	0.019887	0.0212377	0.0546155	0.0667333	0.0647311	0.025641	0.0433946	0.0573961	0.0783003	0	0.00278792	0	0.00356519	0	0	0	0.0123455	0	0	0	0	0
k__Bacteria; p__Bacteroidetes; c__Bacteroidia; o__Bacteroidales; f__[Paraprevotellaceae]; g__CF231; s__	419	0.190108	-4.40128	0.000315152	0.00665942	0.00103374	0.0147962	0.00387177	0	0.000540361	0	0	0	0	0	0	0	0	0	0	0	0.0170364	0	0.0130995	0.0522894	0	0	0.000310061	0	0.00220668	0	0.00163036	0	0
k__Bacteria; p__Bacteroidetes; c__Bacteroidia; o__Bacteroidales; f__[Paraprevotellaceae]; g__CF231; s__	420	0.000514711	4.1581	0.0345855	0.00193723	0.0253731	0.00617084	0.0309741	0.0875427	0.00513343	0.00686198	0.00859178	0.0668423	0.0241874	0.0333761	0.0569111	0.0656603	0.0198135	0.0147936	0.0318867	0.0316213	0	0.0223034	0	0	0	0	0	0.00288061	0	0	0	0	0
k__Bacteria; p__Bacteroidetes; c__Bacteroidia; o__Bacteroidales; f__[Paraprevotellaceae]; g__CF231; s__	421	0.0492719	#DIV/0!	0.00427222	0	0.0107413	0	0	0	0.00027018	0.00108347	0	0.0403264	0.000294968	0.00505699	0.00317778	0.00960127	0	0	0	0	0	0	0	0	0	0	0	0	0	0	0	0	0
k__Bacteria; p__Bacteroidetes; c__Bacteroidia; o__Bacteroidales; f__[Paraprevotellaceae]; g__CF231; s__	422	0.269639	-2.45987	0.00331333	0.0182289	0.00570541	0.0344543	0.0193588	0.00875427	0	0	0	0	0.00884904	0.00353989	0	0.00588465	0	0	0	0	0.112703	0.00836377	0.0157194	0.0724922	0	0	0.0055811	0.000823032	0.00662003	0	0.0146733	0	0
k__Bacteria; p__Bacteroidetes; c__Bacteroidia; o__Bacteroidales; f__[Paraprevotellaceae]; g__CF231; s__	423	0.0240997	#DIV/0!	0.00276237	0	0.00554985	0	0	0	0.00486325	0.000361157	0.00143196	0	0.000884904	0.00455129	0.00231111	0	0	0	0.00318867	0.0210808	0	0	0	0	0	0	0	0	0	0	0	0	0
k__Bacteria; p__Bacteroidetes; c__Bacteroidia; o__Bacteroidales; f__[Paraprevotellaceae]; g__CF231; s__	424	0.14192	3.12609	0.00214871	0.000246111	0.00406731	0.000772142	0.0154871	0	0.0027018	0	0.00257753	0	0.00147484	0	0.00115556	0	0.0034965	0	0.00318867	0	0	0.00278792	0	0	0	0	0	0.000411516	0	0	0	0	0
k__Bacteria; p__Bacteroidetes; c__Bacteroidia; o__Bacteroidales; f__[Paraprevotellaceae]; g__YRC22; s__	425	0.00176889	-3.78351	0.000288236	0.00396915	0.000476004	0.00342864	0	0	0.0013509	0	0.000572785	0	0.000294968	0	0.000577778	0.00123887	0	0	0	0	0.00786297	0.00836377	0.00654973	0.00356519	0.00074276	0.00649674	0.000620122	0	0.00220668	0.00053927	0.00163036	0.00313863	0.00988277
k__Bacteria; p__Bacteroidetes; c__Bacteroidia; o__Bacteroidales; f__[Paraprevotellaceae]; g__YRC22; s__	426	0.296935	-3.33103	0.0219279	0.220667	0.0189119	0.42182	0.0154871	0.0612799	0.0318813	0.00541735	0.00486867	0.0356308	0.0117987	0.0126425	0.0488222	0.019822	0.0011655	0.0424084	0.0127547	0.00301155	0.0445569	0.0278792	0.0117895	0.00356519	0.800943	0.0104947	0.0337967	0.00329213	0.110334	0.0579715	0.345637	1.40977	0.00864742
k__Bacteria; p__Bacteroidetes; c__Bacteroidia; o__Bacteroidales; f__[Paraprevotellaceae]; g__YRC22; s__	427	0.864606	-2.02978	0.00072753	0.00297082	0.00164484	0.00535195	0	0	0.00108072	0.000361157	0	0.000552416	0	0	0	0.00216803	0	0	0	0.0060231	0.010484	0.0111517	0	0	0	0	0.00217043	0.0148146	0	0	0	0	0
k__Bacteria; p__Bacteroidetes; c__Bacteroidia; o__Bacteroidales; f__[Paraprevotellaceae]; g__YRC22; s__	428	0.0135798	-2.3796	0.0819139	0.426273	0.0683126	0.391219	0.17423	0.218857	0.0548466	0.0025281	0.0526962	0.0251349	0.0383458	0.0257907	0.121044	0.15393	0.0454545	0.000986242	0.127547	0.105404	1.11785	0.828013	0.561967	0.450402	0.13444	0.825835	0.0632525	0.00864183	0.178741	0.119179	0.0635842	0.218658	0.970982
k__Bacteria; p__Bacteroidetes; c__Bacteroidia; o__Bacteroidales; f__[Paraprevotellaceae]; g__YRC22; s__	429	0.000458554	-5.02469	0.00828726	0.269769	0.0090233	0.266904	0.0116153	0.0175085	0.00297198	0.000722314	0.0277801	0.0215442	0.00471949	0	0.00231111	0.00371662	0.0011655	0	0.0159434	0.0060231	0.272583	0.0864256	0.112655	0.144984	0.73459	0.257121	0.191618	0.0296291	0.0308935	0.0299295	0.797248	0.223889	0.595437
k__Bacteria; p__Bacteroidetes; c__Bacteroidia; o__Bacteroidales; f__[Paraprevotellaceae]; g__YRC22; s__	430	0.011125	#DIV/0!	0.00221802	0	0.00280546	0	0	0	0	0.00288925	0.000286393	0.00414312	0.00678426	0.0020228	0.00317778	0.00154859	0.0011655	0	0	0.00903465	0	0	0	0	0	0	0	0	0	0	0	0	0
k__Bacteria; p__Bacteroidetes; c__Bacteroidia; o__Bacteroidales; f__[Paraprevotellaceae]; g__YRC22; s__	431	0.0787326	-1.90156	0.00221172	0.00826339	0.00247882	0.0204093	0.00387177	0	0.0027018	0.000361157	0.000286393	0.00718141	0	0.0010114	0.00693333	0.00309718	0.002331	0	0.00318867	0	0	0.0613343	0	0	0	0	0	0.0460898	0	0	0	0	0
k__Bacteria; p__Bacteroidetes; c__Bacteroidia; o__Bacteroidales; f__[Paraprevotellaceae]; g__YRC22; s__	432	0.00502736	1.41506	0.0478267	0.0179347	0.0353899	0.0463022	0.0619483	0.0700341	0.02999	0.0025281	0.0237706	0.118769	0.00973394	0.00809119	0.0728	0.101278	0.0641026	0.0197248	0.0446414	0.0421617	0	0.0780618	0	0	0.000247587	0	0	0.154318	0	0	0	0.000523106	0
k__Bacteria; p__Bacteroidetes; c__Bacteroidia; o__Bacteroidales; f__[Paraprevotellaceae]; g__YRC22; s__	433	0.0939245	#DIV/0!	0.00443274	0	0.0115317	0	0.0425894	0	0.0013509	0	0	0.000276208	0	0.000505699	0.013	0.00433606	0	0	0	0	0	0	0	0	0	0	0	0	0	0	0	0	0
k__Bacteria; p__Bacteroidetes; c__Bacteroidia; o__Bacteroidales; f__[Paraprevotellaceae]; g__YRC22; s__	434	0.162808	1.72389	0.0235628	0.00713321	0.0275087	0.0122424	0.0542047	0	0.0399867	0.00397273	0.00200475	0.0102197	0.00206477	0.00404559	0.0563333	0.0210608	0	0.00197248	0.0542075	0.0798061	0.0157259	0.0446068	0.00130995	0.0011884	0.000495173	0.00649674	0.000930184	0.011934	0	0.00242671	0.00163036	0.00104621	0.00494138
k__Bacteria; p__Bacteroidetes; c__Bacteroidia; o__Bacteroidales; f__[Paraprevotellaceae]; g__YRC22; s__	435	0.00221618	#DIV/0!	0.00313631	0	0.00406103	0	0.00387177	0.00875427	0.00108072	0.000361157	0.0134605	0.00110483	0.000589936	0.000505699	0.00404444	0.00712352	0	0	0	0.00301155	0	0	0	0	0	0	0	0	0	0	0	0	0
k__Bacteria; p__Bacteroidetes; c__Bacteroidia; o__Bacteroidales; f__[Paraprevotellaceae]; g__YRC22; s__	436	0.000514711	9.16628	0.0110434	1.92211e-05	0.0148846	6.93027e-05	0.0232306	0.0262628	0.00189126	0.000722314	0.0077326	0.00497174	0.00973394	0.000505699	0.00895555	0.0542007	0.0011655	0	0.00318867	0.0120462	0	0	0	0	0	0.000249874	0	0	0	0	0	0	0
k__Bacteria; p__Bacteroidetes; c__Bacteroidia; o__Bacteroidales; f__[Paraprevotellaceae]; g__YRC22; s__	437	0.575106	-1.58201	0.0244456	0.0731867	0.0134663	0.0973587	0.0116153	0.0175085	0.0205337	0.0223917	0.0254889	0.021268	0.0436552	0.0262964	0.0245555	0.0306621	0.041958	0.00493121	0.00318867	0.0481848	0.0157259	0.0501826	0.00392984	0.0463475	0.0195593	0.0344827	0.0412381	0.19547	0.295695	0.0129425	0.221729	0.0141239	0
k__Bacteria; p__Bacteroidetes; c__Bacteroidia; o__Bacteroidales; f__[Paraprevotellaceae]; g__YRC22; s__	438	0.000458554	5.60102	0.0659222	0.00135817	0.0421572	0.00462001	0.0464612	0.0262628	0.0178319	0.0678975	0.0423861	0.138104	0.109728	0.0996227	0.0554666	0.119551	0.0104895	0.0147936	0.102038	0.0722772	0	0.0167275	0	0	0.000247587	0	0	0.000411516	0	0.000269635	0	0	0
k__Bacteria; p__Bacteroidetes; c__Bacteroidia; o__Bacteroidales; f__[Paraprevotellaceae]; g__YRC22; s__	439	0.575106	#NUM!	0	0.000644786	0	0.00169943	0	0	0	0	0	0	0	0	0	0	0	0	0	0	0.00262099	0	0	0	0	0	0	0.00576122	0	0	0	0	0
k__Bacteria; p__Bacteroidetes; c__Bacteroidia; o__Bacteroidales; f__[Paraprevotellaceae]; g__YRC22; s__	440	0.000458554	#DIV/0!	0.0257076	0	0.0197094	0	0.0309741	0.0350171	0.00324217	0.0111959	0.0303576	0.0428122	0.000884904	0.0010114	0.0210889	0.00898183	0.016317	0.0591745	0.0446414	0.0542079	0	0	0	0	0	0	0	0	0	0	0	0	0
k__Bacteria; p__Bacteroidetes; c__Bacteroidia; o__Bacteroidales; f__[Paraprevotellaceae]; g__YRC22; s__	441	0.000458554	-8.39896	0.00048157	0.162554	0.000901327	0.125536	0	0	0.00027018	0	0	0.0033145	0	0.000505699	0.000866666	0.000619437	0.0011655	0	0	0	0.258168	0.0139396	0.132305	0.0237679	0.20723	0.373562	0.278125	0.00617274	0.178741	0.0630945	0.0374984	0.317002	0.223598
k__Bacteria; p__Bacteroidetes; c__Bacteroidia; o__Bacteroidales; f__[Paraprevotellaceae]; g__YRC22; s__	442	0.000514711	#DIV/0!	0.0114661	0	0.0132353	0	0	0.0437713	0.00108072	0.00180578	0.00830539	0.0162963	0.000294968	0.010114	0.0291778	0.00247775	0.004662	0.00197248	0.0255094	0.0150577	0	0	0	0	0	0	0	0	0	0	0	0	0
k__Bacteria; p__Bacteroidetes; c__Bacteroidia; o__Bacteroidales; f__[Paraprevotellaceae]; g__YRC22; s__	443	0.0939245	#DIV/0!	0.000849222	0	0.0014155	0	0.00387177	0	0.000540361	0	0.00171836	0.000552416	0.00117987	0	0	0.00402634	0	0	0	0	0	0	0	0	0	0	0	0	0	0	0	0	0
k__Bacteria; p__Bacteroidetes; c__Bacteroidia; o__Bacteroidales; f__[Paraprevotellaceae]; g__YRC22; s__	444	0.600367	#DIV/0!	0.000558574	0	0.00164232	0	0	0	0	0.00180578	0.00601425	0	0	0	0	0	0	0	0	0	0	0	0	0	0	0	0	0	0	0	0	0	0
k__Bacteria; p__Bacteroidetes; c__Bacteroidia; o__Bacteroidales; f__[Paraprevotellaceae]; g__YRC22; s__	445	0.422404	#DIV/0!	0.00162658	0	0.00585316	0	0	0	0.000540361	0	0	0.000276208	0	0	0.0219555	0	0	0	0	0	0	0	0	0	0	0	0	0	0	0	0	0	0
k__Bacteria; p__Bacteroidetes; c__Bacteroidia; o__Bacteroidales; f__[Paraprevotellaceae]; g__YRC22; s__	446	0.600367	#DIV/0!	3.99335e-05	0	0.000101576	0	0	0	0.00027018	0	0	0	0	0	0.000288889	0	0	0	0	0	0	0	0	0	0	0	0	0	0	0	0	0	0
k__Bacteria; p__Bacteroidetes; c__Bacteroidia; o__Bacteroidales; f__Bacteroidaceae; g__BF311; s__	447	0.000497244	4.73758	0.112017	0.00419883	0.103831	0.00823367	0.06582	0.0175085	0.00702469	0.0837884	0.0635792	0.200803	0.219751	0.403042	0.102267	0.0991099	0.0979021	0.0601608	0.0255094	0.121968	0	0.0111517	0	0	0.00148552	0	0	0.0288061	0.00662003	0	0.00652146	0	0
k__Bacteria; p__Bacteroidetes; c__Bacteroidia; o__Bacteroidales; f__Bacteroidaceae; g__BF311; s__	448	0.011125	#DIV/0!	0.00363157	0	0.00482967	0	0	0	0	0.00108347	0.00143196	0.00607658	0.00501445	0.0111254	0	0.00278747	0.0011655	0.0157799	0.00637735	0	0	0	0	0	0	0	0	0	0	0	0	0	0
k__Bacteria; p__Bacteroidetes; c__Bacteroidia; o__Bacteroidales; f__Bacteroidaceae; g__BF311; s__	449	0.00502736	4.95025	0.008708	0.000281672	0.0100358	0.00101558	0.00774353	0	0	0.00288925	0.00257753	0.0220966	0.0147484	0.0323648	0.0176222	0.0145568	0.0011655	0.00295873	0.00318867	0	0	0	0	0	0	0	0	0	0	0	0	0.00366174	0
k__Bacteria; p__Bacteroidetes; c__Bacteroidia; o__Bacteroidales; f__Bacteroidaceae; g__BF311; s__	450	0.000458554	10.0328	0.0217266	2.07411e-05	0.0145128	7.47832e-05	0.0154871	0.0262628	0.000810541	0.00722314	0.0154652	0.026516	0.0135685	0.0328704	0.0606666	0.0257066	0.0128205	0.0138074	0.0318867	0.0210808	0	0	0	0	0	0	0	0	0	0.000269635	0	0	0
k__Bacteria; p__Bacteroidetes; c__Bacteroidia; o__Bacteroidales; f__Bacteroidaceae; g__BF311; s__	451	0.259014	-0.88006	0.016704	0.030743	0.0249697	0.0333145	0	0.00875427	0.00297198	0.00288925	0.0930776	0.00469554	0.0109138	0.0020228	0.00808889	0	0.00699301	0.0295873	0.0382641	0.0255982	0.10615	0.036243	0.00261989	0.0273331	0.00470415	0.0124937	0.0192238	0.0617274	0.0816471	0.00134817	0.0342376	0.00575416	0.00617673
k__Bacteria; p__Bacteroidetes; c__Bacteroidia; o__Bacteroidales; f__Bacteroidaceae; g__BF311; s__	452	0.011125	#DIV/0!	0.00241888	0	0.00319853	0	0	0.00875427	0	0	0.000572785	0.00662899	0.00678426	0.0020228	0.000288889	0.000929155	0	0	0.00637735	0.00150577	0	0	0	0	0	0	0	0	0	0	0	0	0
k__Bacteria; p__Bacteroidetes; c__Bacteroidia; o__Bacteroidales; f__Bacteroidaceae; g__BF311; s__	453	0.00502736	#DIV/0!	0.00734069	0	0.0106604	0	0.0116153	0	0	0.000722314	0.000572785	0.0118769	0.000884904	0.0015171	0.0352444	0.0229192	0.004662	0	0.0127547	0	0	0	0	0	0	0	0	0	0	0	0	0	0
k__Bacteria; p__Bacteroidetes; c__Bacteroidia; o__Bacteroidales; f__Bacteroidaceae; g__BF311; s__	454	0.000514711	#DIV/0!	0.039875	0	0.0402075	0	0.00387177	0.0525256	0.0013509	0.00830661	0.0392358	0.0538606	0.0333314	0.0505699	0.0762666	0.150833	0.027972	0.00591745	0	0.0542079	0	0	0	0	0	0	0	0	0	0	0	0	0
k__Bacteria; p__Bacteroidetes; c__Bacteroidia; o__Bacteroidales; f__Bacteroidaceae; g__BF311; s__	455	0.000497244	4.88262	0.0273291	0.000926425	0.0205821	0.00190177	0.00387177	0.00875427	0.00243162	0.0111959	0.032076	0.062423	0.0407056	0.0333761	0.026	0.0703061	0.018648	0.0374772	0.0127547	0.0225866	0	0.00557585	0	0	0.000990347	0.000499749	0	0	0	0.000269635	0	0.00470795	0
k__Bacteria; p__Bacteroidetes; c__Bacteroidia; o__Bacteroidales; f__Bacteroidaceae; g__BF311; s__	456	0.977175	-2.15235	0.00132486	0.00588969	0.00154198	0.0111099	0	0	0.00027018	0.000722314	0.000859178	0.00138104	0.00147484	0.0015171	0.0026	0.00154859	0.0011655	0.000986242	0	0.0060231	0.0340729	0	0	0.00713038	0	0	0.00372073	0.026337	0	0.000808904	0.00326073	0	0.00123535
k__Bacteria; p__Bacteroidetes; c__Bacteroidia; o__Bacteroidales; f__Bacteroidaceae; g__BF311; s__	457	0.00162797	2.13261	0.0134392	0.00306474	0.00745905	0.00615658	0.00774353	0.0262628	0.00108072	0.00722314	0.014606	0.0193346	0.0238924	0.00859689	0.0121333	0.0232289	0.00932401	0.0147936	0.00637735	0.013552	0.00655248	0.0223034	0	0.0011884	0	0.000499749	0.000620122	0.00534971	0	0	0	0.00209242	0.00123535
k__Bacteria; p__Bacteroidetes; c__Bacteroidia; o__Bacteroidales; f__Bacteroidaceae; g__BF311; s__	458	0.0787326	-5.31527	7.55797e-05	0.00300927	0.000192338	0.00572607	0	0	0	0	0	0.000552416	0	0.000505699	0	0	0	0	0	0	0.0196574	0.00278792	0.00130995	0.0011884	0	0	0.0040308	0.00987638	0	0.000269635	0	0	0
k__Bacteria; p__Bacteroidetes; c__Bacteroidia; o__Bacteroidales; f__Bacteroidaceae; g__BF311; s__	459	0.000622117	3.36153	0.00506374	0.000492663	0.00305346	0.00129276	0.00387177	0.00875427	0.00027018	0.0050562	0.0040095	0.00524795	0.0082591	0.0126425	0.00231111	0.00433606	0.0034965	0.00493121	0.00318867	0.00451732	0	0	0	0	0.000247587	0	0	0.00452667	0	0	0.00163036	0	0
k__Bacteria; p__Bacteroidetes; c__Bacteroidia; o__Bacteroidales; f__Bacteroidaceae; g__BF311; s__	460	0.047746	3.96184	0.000986518	6.33101e-05	0.00125654	0.000228268	0	0	0	0.000722314	0.000286393	0.00303829	0.00265471	0.00353989	0.00144444	0.000619437	0	0	0	0.00150577	0	0	0	0	0	0	0	0.000823032	0	0	0	0	0
k__Bacteria; p__Bacteroidetes; c__Bacteroidia; o__Bacteroidales; f__Bacteroidaceae; g__BF311; s__	461	0.000666541	6.24221	0.0106771	0.000141046	0.00976325	0.000379958	0.00774353	0.0350171	0.00027018	0.00433388	0.00658703	0.0138104	0.0141585	0.00707979	0.0216667	0.0201317	0.004662	0.00197248	0	0.0120462	0.0013105	0	0	0	0	0	0	0	0	0	0	0.000523106	0
k__Bacteria; p__Bacteroidetes; c__Bacteroidia; o__Bacteroidales; f__BS11; g__; s__	462	0.00305382	2.45457	0.129548	0.0236337	0.117748	0.0642929	0.224562	0.0350171	0.0502536	0.00758429	0.0332215	0.253007	0.00884904	0.0343875	0.260867	0.141541	0.343823	0.00788994	0.245528	0.167141	0.0157259	0.236973	0.00523979	0	0.00718001	0.0114942	0	0.00370364	0.0110334	0.00889795	0	0.00575416	0.00123535
k__Bacteria; p__Bacteroidetes; c__Bacteroidia; o__Bacteroidales; f__BS11; g__; s__	463	0.000702657	3.74747	0.36804	0.0274028	0.368287	0.056401	0.387177	0.236365	0.0661942	0.0245587	0.0237706	0.497451	0.0410005	0.0718093	1.18762	1.07782	0.437063	0.244588	0.38583	0.471307	0.205748	0.0613343	0.0117895	0.00594198	0.00495173	0.0334832	0.000620122	0.00123455	0.0220668	0.00188744	0	0.00470795	0.00247069
k__Bacteria; p__Bacteroidetes; c__Bacteroidia; o__Bacteroidales; f__BS11; g__; s__	464	0.000458554	6.77128	0.0994097	0.000910062	0.135542	0.00235922	0.0464612	0.0612799	0.0534957	0.00975124	0.00200475	0.0991587	0.0297918	0.015171	0.236022	0.504531	0.0641026	0.0138074	0.0573961	0.198762	0	0.00836377	0	0	0.000247587	0	0	0	0	0.00269635	0	0.000523106	0
k__Bacteria; p__Bacteroidetes; c__Bacteroidia; o__Bacteroidales; f__BS11; g__; s__	465	0.00377923	3.05078	0.032171	0.00388229	0.0422085	0.0104071	0.06582	0.0262628	0.00918614	0.00469504	0.00114557	0.0124294	0.00265471	0.0020228	0.142133	0.0402634	0.0314685	0	0.0159434	0.0963696	0	0.036243	0	0	0.000495173	0.000249874	0	0	0	0.0134817	0	0	0
k__Bacteria; p__Bacteroidetes; c__Bacteroidia; o__Bacteroidales; f__BS11; g__; s__	466	0.0010873	11.0898	0.0452051	2.07411e-05	0.0791401	7.47832e-05	0.00387177	0	0.00189126	0.00288925	0.000286393	0.0519271	0.00147484	0.00809119	0.145889	0.27503	0.00815851	0.0927067	0	0.0406559	0	0	0	0	0	0	0	0	0	0.000269635	0	0	0
k__Bacteria; p__Bacteroidetes; c__Bacteroidia; o__Bacteroidales; f__BS11; g__; s__	467	0.00840891	1.53101	0.186802	0.0646399	0.203429	0.146626	0.274895	0.192594	0.0661942	0.0111959	0.0168972	0.180088	0.0321515	0.0510756	0.333089	0.792879	0.124709	0.0838306	0.286981	0.168647	0.0209679	0.501826	0.00261989	0.0011884	0.011389	0.033733	0.00155031	0.241971	0.00220668	0.00242671	0.00489109	0.0130776	0.00247069
k__Bacteria; p__Bacteroidetes; c__Bacteroidia; o__Bacteroidales; f__BS11; g__; s__	468	0.0939245	#DIV/0!	0.00545756	0	0.0162687	0	0	0	0	0	0	0.0607658	0.000294968	0.000505699	0.00115556	0.000929155	0	0	0.0127547	0	0	0	0	0	0	0	0	0	0	0	0	0	0
k__Bacteria; p__Bacteroidetes; c__Bacteroidia; o__Bacteroidales; f__BS11; g__; s__	469	0.0787326	5.6688	0.00211029	4.14823e-05	0.00318391	0.000149566	0.00774353	0	0.00108072	0.00433388	0.00114557	0.00828624	0	0	0.00664444	0.000309718	0	0	0	0	0	0	0	0	0	0	0	0	0	0.00053927	0	0	0
k__Bacteria; p__Bacteroidetes; c__Bacteroidia; o__Bacteroidales; f__BS11; g__; s__	470	0.00221618	#DIV/0!	0.00753233	0	0.00825809	0	0	0.0175085	0.00621415	0.0111959	0.00200475	0.0234777	0.00147484	0.00910259	0.0222444	0.00805268	0.0011655	0	0	0.00301155	0	0	0	0	0	0	0	0	0	0	0	0	0
k__Bacteria; p__Bacteroidetes; c__Bacteroidia; o__Bacteroidales; f__BS11; g__; s__	471	0.108521	-2.915	0.00132333	0.00998093	0.00170115	0.0150419	0	0	0.0013509	0	0.00143196	0.00220966	0.00176981	0	0.00317778	0.00557493	0	0	0	0.00301155	0.00917347	0	0	0	0.00420897	0.00599699	0	0.00576122	0	0.0277724	0.00652146	0.0517875	0.0185302
k__Bacteria; p__Bacteroidetes; c__Bacteroidia; o__Bacteroidales; f__BS11; g__; s__	472	0.0118512	2.15677	0.241136	0.0540768	0.243936	0.0540265	0.511073	0.157577	0.142385	0.011557	0.037231	0.333935	0.082296	0.0318591	0.905666	0.386838	0.137529	0.143005	0.127547	0.367409	0.013105	0.0501826	0.0825266	0.0166376	0.000495173	0.0162418	0.000620122	0.0691347	0.00882671	0.178229	0.0505413	0.094159	0.122299
k__Bacteria; p__Bacteroidetes; c__Bacteroidia; o__Bacteroidales; f__BS11; g__; s__	473	0.000967903	#DIV/0!	0.0182068	0	0.0280535	0	0.06582	0.0350171	0.00108072	0.000361157	0.00343671	0.021268	0	0.0010114	0.0291778	0.00309718	0.002331	0	0.0892829	0.00301155	0	0	0	0	0	0	0	0	0	0	0	0	0
k__Bacteria; p__Bacteroidetes; c__Bacteroidia; o__Bacteroidales; f__BS11; g__; s__	474	0.00187704	3.32822	0.0288599	0.00287342	0.0315812	0.00558183	0.0851789	0.0175085	0.010537	0.00397273	0.000572785	0.0168487	0.00176981	0.0030342	0.0499778	0.0322107	0.025641	0.0226836	0.0286981	0.105404	0	0.00836377	0.00130995	0	0.00198069	0.000499749	0	0.0024691	0	0.00161781	0	0.019878	0.00123535
k__Bacteria; p__Bacteroidetes; c__Bacteroidia; o__Bacteroidales; f__BS11; g__; s__	475	0.00235092	1.19507	0.0265551	0.0115983	0.0337738	0.0384198	0.00774353	0.0175085	0.0097265	0.00108347	0.016038	0.0165725	0.0073742	0.0020228	0.134044	0.0495549	0.0384615	0.0207111	0.0223207	0.0286097	0.0013105	0.139396	0.00392984	0.0011884	0.000247587	0.00324837	0	0.000411516	0	0	0	0.00104621	0
k__Bacteria; p__Bacteroidetes; c__Bacteroidia; o__Bacteroidales; f__BS11; g__; s__	476	0.000514711	8.8476	0.0437762	9.50266e-05	0.0486197	0.000342623	0.0232306	0	0.0218846	0.00144463	0.00286393	0.0270684	0.00648929	0.0136539	0.0863777	0.0603951	0.0780886	0.157799	0.019132	0.114439	0	0	0	0	0	0	0	0	0	0	0	0	0.00123535
k__Bacteria; p__Bacteroidetes; c__Bacteroidia; o__Bacteroidales; f__BS11; g__; s__	477	0.2764	-3.17817	0.000188025	0.00170193	0.000401527	0.00257958	0	0	0.000540361	0.000361157	0.000286393	0	0	0	0.00144444	0	0	0	0	0	0	0	0	0	0.00198069	0.000499749	0	0	0	0.00431416	0.00815182	0.00470795	0.00247069
k__Bacteria; p__Bacteroidetes; c__Bacteroidia; o__Bacteroidales; f__BS11; g__; s__	478	0.0010873	10.0326	0.0199475	1.90451e-05	0.0301209	6.86682e-05	0	0	0.00999668	0.00361157	0.00171836	0.0229253	0.00383458	0.00657409	0.100822	0.00185831	0.0606061	0.0147936	0.0510188	0.00150577	0	0	0	0	0.000247587	0	0	0	0	0	0	0	0
k__Bacteria; p__Bacteroidetes; c__Bacteroidia; o__Bacteroidales; f__BS11; g__; s__	479	0.000898693	3.48991	0.0479875	0.0042713	0.0472932	0.0138163	0.0193588	0.148823	0.0102669	0.00144463	0.0180427	0.0386691	0.0123886	0.0111254	0.144444	0.0727838	0.0501166	0.0719957	0.0286981	0.0436675	0	0.0501826	0	0	0.000495173	0.000749623	0	0.0024691	0	0	0.00163036	0	0
k__Bacteria; p__Bacteroidetes; c__Bacteroidia; o__Bacteroidales; f__BS11; g__; s__	480	0.00647832	2.07223	0.024542	0.00583588	0.0261241	0.0117938	0.0580765	0.0350171	0.0113476	0.00108347	0.00515507	0.0193346	0.00147484	0.0030342	0.0615333	0.085792	0.0221445	0.0147936	0.0127547	0.0120462	0.010484	0.00557585	0	0	0.0198069	0.03973	0	0	0	0.000269635	0	0	0
k__Bacteria; p__Bacteroidetes; c__Bacteroidia; o__Bacteroidales; f__BS11; g__; s__	481	0.000794953	3.346	0.155583	0.0153009	0.137037	0.0241601	0.0851789	0.157577	0.0764611	0.0158909	0.0177563	0.153848	0.0235974	0.041973	0.420911	0.41812	0.238928	0.089748	0.271037	0.167141	0.0642143	0.00278792	0	0.00237679	0.00891312	0.067716	0.00372073	0.00205758	0.00220668	0.00350525	0	0.0340019	0.00741207
k__Bacteria; p__Bacteroidetes; c__Bacteroidia; o__Bacteroidales; f__BS11; g__; s__	482	0.746609	-4.38431	3.85972e-05	0.000806055	0.000144418	0.00243315	0	0	0.000540361	0	0	0	0	0	0	0	0	0	0	0	0	0	0	0	0.00173311	0.00874561	0	0	0	0	0	0	0
k__Bacteria; p__Bacteroidetes; c__Bacteroidia; o__Bacteroidales; f__BS11; g__; s__	483	0.0363236	4.59035	0.00562923	0.000233677	0.00966059	0.000770557	0	0	0.000540361	0	0	0.0290018	0	0.00606839	0.000866666	0.000309718	0.0011655	0.00197248	0.0223207	0.0165635	0	0.00278792	0	0	0	0.000249874	0	0	0	0	0	0	0
k__Bacteria; p__Bacteroidetes; c__Bacteroidia; o__Bacteroidales; f__BS11; g__; s__	484	0.0308052	-4.00842	0.00194623	0.0313218	0.0018609	0.0394964	0.00387177	0	0.00594397	0	0.00200475	0.00220966	0.000294968	0.0010114	0.00346667	0.00216803	0.002331	0.00394497	0	0	0.013105	0	0.137544	0.00237679	0.0136173	0.0682157	0	0.0411516	0.00441335	0.0563537	0	0.044464	0.0259423
k__Bacteria; p__Bacteroidetes; c__Bacteroidia; o__Bacteroidales; f__BS11; g__; s__	485	0.463699	-0.579827	0.00260503	0.00389367	0.00605951	0.0111449	0	0	0.000810541	0	0.000286393	0.00138104	0	0	0.0213778	0.000619437	0.0104895	0	0	0.00150577	0	0	0	0	0	0	0	0	0	0.0404452	0	0.00523106	0.00494138
k__Bacteria; p__Bacteroidetes; c__Bacteroidia; o__Bacteroidales; f__BS11; g__; s__	486	0.00959346	6.93574	0.0147786	0.000120717	0.0264157	0.00043525	0.00774353	0	0.000810541	0.000361157	0	0.0140866	0.000294968	0.00707979	0.0898444	0.0576076	0.016317	0	0.0127547	0	0	0	0	0	0	0	0	0	0	0	0	0.00156932	0
k__Bacteria; p__Bacteroidetes; c__Bacteroidia; o__Bacteroidales; f__BS11; g__; s__	487	0.000458554	9.11366	0.69849	0.00126088	0.828186	0.0030418	0.801456	1.37442	0.272882	0.626968	0.203052	2.35025	0.0215327	0.118839	2.48791	0.454667	0.869464	0.108487	0.0286981	0.060231	0	0	0	0	0.00247587	0.00174912	0.000310061	0.000823032	0.0110334	0	0	0	0
k__Bacteria; p__Bacteroidetes; c__Bacteroidia; o__Bacteroidales; f__BS11; g__; s__	488	0.000967903	#DIV/0!	0.0617909	0	0.128772	0	0	0	0.00243162	0.00577851	0.0137468	0.0223728	0.0103239	0.00657409	0.449222	0.00588465	0.248252	0.0621332	0.0127547	0.0255982	0	0	0	0	0	0	0	0	0	0	0	0	0
k__Bacteria; p__Bacteroidetes; c__Bacteroidia; o__Bacteroidales; f__BS11; g__; s__	489	0.000967903	#DIV/0!	0.00800464	0	0.0156347	0	0.00387177	0.00875427	0.000810541	0.00108347	0.000286393	0.00441933	0	0.00505699	0.00866666	0.000619437	0.0594406	0.000986242	0	0.0180693	0	0	0	0	0	0	0	0	0	0	0	0	0
k__Bacteria; p__Bacteroidetes; c__Bacteroidia; o__Bacteroidales; f__BS11; g__; s__	490	0.010871	-2.25054	0.00440252	0.0209499	0.00551851	0.0186056	0	0	0.0097265	0.00108347	0.00945096	0.00386691	0.000294968	0.0020228	0.0115556	0.00464578	0.0174825	0	0	0.00150577	0.0170364	0.0446068	0.0261989	0.0190143	0.0136173	0.0364817	0	0.0164606	0.00441335	0.0202226	0.0652146	0.00784658	0.00123535
k__Bacteria; p__Bacteroidetes; c__Bacteroidia; o__Bacteroidales; f__BS11; g__; s__	491	0.0240997	#DIV/0!	0.0103562	0	0.0216597	0	0.0774353	0.0350171	0.00027018	0.000361157	0	0.000828624	0	0	0.00433333	0	0.013986	0	0.0127547	0	0	0	0	0	0	0	0	0	0	0	0	0	0
k__Bacteria; p__Bacteroidetes; c__Bacteroidia; o__Bacteroidales; f__BS11; g__; s__	492	0.00502736	#DIV/0!	0.0185526	0	0.0261608	0	0	0	0.0140494	0.000361157	0	0.00718141	0	0.00404559	0.0135778	0.0718547	0.04662	0.0226836	0.0733395	0.0060231	0	0	0	0	0	0	0	0	0	0	0	0	0
k__Bacteria; p__Bacteroidetes; c__Bacteroidia; o__Bacteroidales; f__BS11; g__; s__	493	0.0492719	#DIV/0!	0.021419	0	0.0759536	0	0	0	0	0.000361157	0	0.00386691	0	0.0010114	0.00491111	0.285251	0	0.00295873	0	0.00150577	0	0	0	0	0	0	0	0	0	0	0	0	0
k__Bacteria; p__Bacteroidetes; c__Bacteroidia; o__Bacteroidales; f__p-2534-18B5; g__; s__	494	1	#DIV/0!	0	0	0	0	0	0	0	0	0	0	0	0	0	0	0	0	0	0	0	0	0	0	0	0	0	0	0	0	0	0	0
k__Bacteria; p__Bacteroidetes; c__Bacteroidia; o__Bacteroidales; f__p-2534-18B5; g__; s__	495	0.575106	#NUM!	0	0.0233099	0	0.0837659	0	0	0	0	0	0	0	0	0	0	0	0	0	0	0	0	0	0	0	0.302098	0.000930184	0	0	0	0	0	0
k__Bacteria; p__Bacteroidetes; c__Bacteroidia; o__Bacteroidales; f__p-2534-18B5; g__; s__	496	0.00235092	-4.98702	0.000317353	0.0100644	0.00102821	0.00969503	0.00387177	0	0	0	0	0.000276208	0.000294968	0	0	0	0	0	0	0	0	0	0.00785968	0.0178259	0.00222828	0.00524736	0.00310061	0.0024691	0.0132401	0.0150995	0.00815182	0.0272015	0.028413
k__Bacteria; p__Bacteroidetes; c__Bacteroidia; o__Bacteroidales; f__Porphyromonadaceae; g__Paludibacter; s__	497	0.000551991	3.72294	0.0472272	0.00357665	0.0610058	0.0123334	0.243921	0.0350171	0.00324217	0.0462281	0.00315032	0.0414312	0.0250723	0.0460186	0.0592222	0.0693769	0.00699301	0.00887618	0.0605848	0.0120462	0	0.0446068	0.00130995	0	0	0	0.000310061	0	0	0.000269635	0	0	0
k__Bacteria; p__Bacteroidetes; c__Bacteroidia; o__Bacteroidales; f__Porphyromonadaceae; g__Parabacteroides; s__	498	0.108521	-3.89524	5.15938e-05	0.000767684	0.000193046	0.00107875	0	0	0	0.000722314	0	0	0	0	0	0	0	0	0	0	0	0	0	0.0011884	0	0	0.000310061	0.00205758	0.00220668	0.00107854	0	0.00313863	0
k__Bacteria; p__Bacteroidetes; c__Bacteroidia; o__Bacteroidales; f__Prevotellaceae; g__Prevotella; s__	499	0.786803	-0.671955	0.0151455	0.0241302	0.013624	0.0324475	0	0.0350171	0.00621415	0.0148074	0.0435317	0.00441933	0.0259572	0.0227565	0.0179111	0.0130082	0.00582751	0	0	0.0225866	0.0891137	0.0975773	0.00392984	0.00831878	0.000495173	0.00349824	0.025115	0.0181067	0.0331002	0.00053927	0.0228251	0.00366174	0.00741207
k__Bacteria; p__Bacteroidetes; c__Bacteroidia; o__Bacteroidales; f__Prevotellaceae; g__Prevotella; s__	500	0.010871	0.234639	0.0139816	0.0118829	0.0169922	0.0416778	0.0425894	0.0175085	0.00189126	0	0.00114557	0.0035907	0.0342163	0.0020228	0.00288889	0	0.00699301	0.0138074	0.0510188	0.0180693	0	0.150548	0.00392984	0	0	0	0	0	0	0	0	0	0
k__Bacteria; p__Bacteroidetes; c__Bacteroidia; o__Bacteroidales; f__Prevotellaceae; g__Prevotella; s__	501	0.000702657	2.27805	0.21059	0.0434187	0.109236	0.0541765	0.189717	0.0787884	0.145627	0.111597	0.352263	0.35106	0.0911451	0.424787	0.188355	0.300737	0.151515	0.267272	0.140302	0.155095	0.0720773	0.0418188	0.0406083	0.0891297	0.0359001	0.00174912	0.197509	0.0115224	0.0331002	0.000269635	0.0407591	0	0
k__Bacteria; p__Bacteroidetes; c__Bacteroidia; o__Bacteroidales; f__Prevotellaceae; g__Prevotella; s__	502	0.000622117	3.89755	0.0556084	0.0037313	0.0514806	0.0100342	0.0542047	0.148823	0.0124283	0.0375603	0.146919	0.00607658	0.0115037	0.0217451	0.0690444	0.0176539	0.135198	0.036491	0.019132	0.0617368	0	0.0139396	0	0	0	0	0	0.0345673	0	0	0	0	0
k__Bacteria; p__Bacteroidetes; c__Bacteroidia; o__Bacteroidales; f__Prevotellaceae; g__Prevotella; s__	503	0.0173895	4.58827	0.0022844	9.49652e-05	0.00261216	0.000342402	0	0	0.00756505	0.00180578	0.00429589	0.00110483	0.00176981	0.0030342	0.00722222	0.00123887	0	0.00394497	0	0	0	0	0	0	0	0	0	0.00123455	0	0	0	0	0
k__Bacteria; p__Bacteroidetes; c__Bacteroidia; o__Bacteroidales; f__Prevotellaceae; g__Prevotella; s__	504	0.786803	#NUM!	0	3.16551e-05	0	0.000114134	0	0	0	0	0	0	0	0	0	0	0	0	0	0	0	0	0	0	0	0	0	0.000411516	0	0	0	0	0
k__Bacteria; p__Bacteroidetes; c__Bacteroidia; o__Bacteroidales; f__Prevotellaceae; g__Prevotella; s__	505	0.31925	-3.60823	0.00757242	0.0923464	0.0110122	0.272401	0	0	0.00756505	0.0353934	0.00544146	0.00939107	0.00766916	0.0293306	0.0026	0.00216803	0.0034965	0.00295873	0	0	0.00393149	0.0613343	0.00785968	0.0463475	0	0.001999	0.00217043	0.99628	0.0397202	0	0.00489109	0.00261553	0.0333543
k__Bacteria; p__Bacteroidetes; c__Bacteroidia; o__Bacteroidales; f__Prevotellaceae; g__Prevotella; s__	506	0.0222458	2.01743	0.00615486	0.00152023	0.00968635	0.00540733	0.00387177	0	0.00162108	0.000722314	0.00114557	0.0209918	0.000884904	0.0020228	0.0309111	0.00743324	0	0	0	0.0165635	0	0.0195155	0	0	0.000247587	0	0	0	0	0	0	0	0
k__Bacteria; p__Bacteroidetes; c__Bacteroidia; o__Bacteroidales; f__Prevotellaceae; g__Prevotella; s__	507	0.00349216	2.33714	0.118008	0.0233541	0.0887766	0.0484377	0.0735636	0.0700341	0.355017	0.143018	0.198184	0.131475	0.0619432	0.132493	0.183733	0.0929155	0.115385	0.00197248	0.00956602	0.0828176	0.0484883	0.0223034	0.0170293	0	0.178015	0	0.00868171	0.000411516	0.00220668	0.000808904	0.0146733	0.0109852	0
k__Bacteria; p__Bacteroidetes; c__Bacteroidia; o__Bacteroidales; f__Prevotellaceae; g__Prevotella; s__	508	0.00187704	6.15126	0.00884241	0.00012441	0.0102972	0.000259257	0.0309741	0	0.0229653	0.00613967	0.00515507	0.00193346	0.00176981	0.0141596	0.0138667	0.000309718	0.002331	0.0226836	0	0.00150577	0	0	0	0	0.000247587	0.000749623	0.000620122	0	0	0	0	0	0
k__Bacteria; p__Bacteroidetes; c__Bacteroidia; o__Bacteroidales; f__Prevotellaceae; g__Prevotella; s__	509	0.0240997	-4.41125	0.00112668	0.0239727	0.00413391	0.0632712	0.0154871	0	0	0	0.000286393	0	0	0	0	0	0	0	0	0	0.00655248	0	0	0.231737	0.0037138	0.0127436	0.00310061	0.00329213	0	0.00242671	0.00978218	0	0.0382957
k__Bacteria; p__Bacteroidetes; c__Bacteroidia; o__Bacteroidales; f__Prevotellaceae; g__Prevotella; s__	510	0.125016	1.86984	0.00278993	0.000763334	0.00370173	0.00249725	0.00774353	0	0.00108072	0.00325041	0.00830539	0.00248587	0.0112088	0.00353989	0.00144444	0	0	0	0	0	0	0	0	0	0	0.000249874	0.000620122	0.00905335	0	0	0	0	0
k__Bacteria; p__Bacteroidetes; c__Bacteroidia; o__Bacteroidales; f__Prevotellaceae; g__Prevotella; s__	511	0.385692	-0.0544674	0.00486645	0.00505369	0.0130824	0.0139818	0	0	0.00405271	0.00650082	0.000572785	0.00276208	0	0.00455129	0	0	0	0	0	0.0496906	0	0.0167275	0	0	0	0	0	0.0489704	0	0	0	0	0
k__Bacteria; p__Bacteroidetes; c__Bacteroidia; o__Bacteroidales; f__Prevotellaceae; g__Prevotella; s__	512	0.000967903	#DIV/0!	0.00633785	0	0.00730294	0	0	0.0175085	0.00297198	0.000722314	0.00859178	0.00524795	0.0165182	0.00505699	0.000866666	0.000929155	0	0.00197248	0.0223207	0.0060231	0	0	0	0	0	0	0	0	0	0	0	0	0
k__Bacteria; p__Bacteroidetes; c__Bacteroidia; o__Bacteroidales; f__Prevotellaceae; g__Prevotella; s__	513	0.000551991	4.05653	0.12516	0.00752194	0.152394	0.0262277	0.104538	0.236365	0.0154003	0.0223917	0.0836266	0.0563464	0.0115037	0.0465243	0.0754	0.59342	0.110723	0.116377	0.235962	0.0436675	0	0.0947894	0	0	0	0.000249874	0	0	0.00220668	0.00053927	0	0	0
k__Bacteria; p__Bacteroidetes; c__Bacteroidia; o__Bacteroidales; f__Prevotellaceae; g__Prevotella; s__	514	0.879697	-0.363789	0.312433	0.40204	0.350742	0.522276	0.0890506	0.954215	0.187235	0.437722	0.282383	0.197765	1.19256	0.164858	0.457311	0.0622534	0.0710956	0.061147	0.0478301	0.168647	0.127118	1.42742	1.22611	0.294722	0	0.001999	0.348509	0.153084	0.101507	0.000269635	0.335855	0.000523106	1.2094
k__Bacteria; p__Bacteroidetes; c__Bacteroidia; o__Bacteroidales; f__Prevotellaceae; g__Prevotella; s__	515	0.913955	-0.334592	0.000340584	0.000429484	0.000660777	0.00105435	0	0	0.00162108	0	0.00200475	0.000552416	0.000589936	0	0	0	0	0	0	0	0	0	0	0	0.0037138	0.00124937	0.000620122	0	0	0	0	0	0
k__Bacteria; p__Bacteroidetes; c__Bacteroidia; o__Bacteroidales; f__Prevotellaceae; g__Prevotella; s__	516	0.422404	#DIV/0!	0.000138921	0	0.00031788	0	0	0	0.00108072	0	0.000286393	0	0	0	0.000577778	0	0	0	0	0	0	0	0	0	0	0	0	0	0	0	0	0	0
k__Bacteria; p__Bacteroidetes; c__Bacteroidia; o__Bacteroidales; f__Prevotellaceae; g__Prevotella; s__	517	1	#DIV/0!	0	0	0	0	0	0	0	0	0	0	0	0	0	0	0	0	0	0	0	0	0	0	0	0	0	0	0	0	0	0	0
k__Bacteria; p__Bacteroidetes; c__Bacteroidia; o__Bacteroidales; f__Prevotellaceae; g__Prevotella; s__	518	0.000497244	4.50423	0.0863475	0.00380488	0.0577175	0.00934035	0.0425894	0.0962969	0.122932	0.0700644	0.0965143	0.151362	0.0923249	0.237679	0.0751111	0.0204414	0.0606061	0.0207111	0.0318867	0.0903465	0	0.0223034	0	0	0	0	0	0.02716	0	0	0	0	0
k__Bacteria; p__Bacteroidetes; c__Bacteroidia; o__Bacteroidales; f__Prevotellaceae; g__Prevotella; s__	519	0.600367	0.447954	0.00293961	0.00215497	0.00384591	0.00361299	0	0	0.00621415	0.00288925	0.00572785	0.00220966	0.00530942	0.0136539	0.00317778	0	0	0.00197248	0	0	0	0.00836377	0	0.00237679	0	0.000249874	0.00217043	0.00123455	0.00220668	0	0.0114125	0	0
k__Bacteria; p__Bacteroidetes; c__Bacteroidia; o__Bacteroidales; f__Prevotellaceae; g__Prevotella; s__	520	0.00647832	9.89232	0.0182669	1.92211e-05	0.0235884	6.93027e-05	0	0	0.0383656	0.023114	0.0148924	0.0635278	0.000589936	0.020228	0.0109778	0	0.00932401	0.00394497	0	0.0707714	0	0	0	0	0	0.000249874	0	0	0	0	0	0	0
k__Bacteria; p__Bacteroidetes; c__Bacteroidia; o__Bacteroidales; f__Prevotellaceae; g__Prevotella; s__	521	0.0010873	9.04552	0.0167269	3.16551e-05	0.0208414	0.000114134	0.0348459	0.00875427	0.0810541	0.0130016	0.0243434	0.00662899	0.00265471	0.00960829	0.0118444	0.0164151	0.018648	0	0.00637735	0	0	0	0	0	0	0	0	0.000411516	0	0	0	0	0
k__Bacteria; p__Bacteroidetes; c__Bacteroidia; o__Bacteroidales; f__Prevotellaceae; g__Prevotella; s__	522	0.0197237	4.47297	0.00210893	9.49652e-05	0.00303248	0.000342402	0.00774353	0	0	0.00288925	0.00973735	0.00165725	0.00176981	0.0010114	0.000288889	0.00123887	0	0	0.00318867	0	0	0	0	0	0	0	0	0.00123455	0	0	0	0	0
k__Bacteria; p__Bacteroidetes; c__Bacteroidia; o__Bacteroidales; f__Prevotellaceae; g__Prevotella; s__	523	0.798659	#DIV/0!	0.00055311	0	0.00206955	0	0.00774353	0	0	0	0	0	0	0	0	0	0	0	0	0	0	0	0	0	0	0	0	0	0	0	0	0	0
k__Bacteria; p__Bacteroidetes; c__Bacteroidia; o__Bacteroidales; f__Prevotellaceae; g__Prevotella; s__	524	0.00305382	1.79092	0.0916655	0.0264901	0.0981327	0.0678602	0.00774353	0.0350171	0.133739	0.353211	0.109975	0.0127056	0.0625332	0.0338818	0.120178	0.0634923	0.0652681	0.00788994	0.0382641	0.239418	0	0.117093	0.00130995	0	0	0.000249874	0.000620122	0.225099	0	0	0	0	0
k__Bacteria; p__Bacteroidetes; c__Bacteroidia; o__Bacteroidales; f__Prevotellaceae; g__Prevotella; s__	525	0.000458554	7.30158	0.0957016	0.00060663	0.123107	0.00136437	0.00774353	0.0350171	0.00297198	0.0487562	0.030644	0.140866	0.467524	0.213911	0.0574889	0.078049	0.039627	0.032546	0.153056	0.0316213	0	0	0	0	0	0.000249874	0.00124024	0	0	0.000269635	0.00489109	0	0.00123535
k__Bacteria; p__Bacteroidetes; c__Bacteroidia; o__Bacteroidales; f__Prevotellaceae; g__Prevotella; s__	526	0.0173895	-0.00930695	0.178806	0.179963	0.12667	0.485073	0.298126	0.280137	0.140224	0.483228	0.32076	0.126227	0.0843608	0.108725	0.0869555	0.214325	0.016317	0.0631195	0.12117	0.159612	0.230647	0.284368	0.0301288	0.0011884	0.00198069	0.000249874	0.00744147	1.76335	0.00220668	0.00161781	0	0.00523106	0.0111181
k__Bacteria; p__Bacteroidetes; c__Bacteroidia; o__Bacteroidales; f__Prevotellaceae; g__Prevotella; s__	527	0.000794953	3.93644	0.132242	0.00863739	0.19995	0.027677	0.0735636	0.0612799	0.0616011	0.0906504	0.0420997	0.0179535	0.0336263	0.0950715	0.441422	0.0377856	0.721445	0.0473396	0.019132	0.108416	0	0.100365	0.00261989	0	0.000247587	0	0	0.00905335	0	0	0	0	0
k__Bacteria; p__Bacteroidetes; c__Bacteroidia; o__Bacteroidales; f__Prevotellaceae; g__Prevotella; s__	528	0.00221618	#DIV/0!	0.00532749	0	0.00553762	0	0.00774353	0.00875427	0.00297198	0	0.000286393	0.00497174	0	0.00859689	0.0179111	0.0126985	0.00815851	0.000986242	0	0.00150577	0	0	0	0	0	0	0	0	0	0	0	0	0
k__Bacteria; p__Bacteroidetes; c__Bacteroidia; o__Bacteroidales; f__Prevotellaceae; g__Prevotella; s__	529	0.0271866	2.16075	0.0116097	0.00259638	0.0122398	0.00452557	0.0232306	0	0.0280988	0.00108347	0.00658703	0.00220966	0.0106188	0.00657409	0.00635555	0.00247775	0.0268065	0.0108487	0	0.0376444	0	0.0111517	0.00654973	0	0	0	0	0.0123455	0	0	0	0	0.00370604
k__Bacteria; p__Bacteroidetes; c__Bacteroidia; o__Bacteroidales; f__Prevotellaceae; g__Prevotella; s__	530	0.00502736	#DIV/0!	0.0072023	0	0.011337	0	0.0425894	0	0	0.00325041	0.00171836	0.0151914	0.000294968	0.00404559	0.0106889	0	0.00932401	0	0.00318867	0.0105404	0	0	0	0	0	0	0	0	0	0	0	0	0
k__Bacteria; p__Bacteroidetes; c__Bacteroidia; o__Bacteroidales; f__Prevotellaceae; g__Prevotella; s__	531	0.846161	-8.3036	4.25794e-05	0.0134534	0.000108331	0.0485069	0	0	0	0	0.000286393	0	0	0	0	0.000309718	0	0	0	0	0	0	0	0	0	0	0	0.174894	0	0	0	0	0
k__Bacteria; p__Bacteroidetes; c__Bacteroidia; o__Bacteroidales; f__Prevotellaceae; g__Prevotella; s__	532	0.0240997	#DIV/0!	0.0020264	0	0.00279542	0	0.00774353	0	0.0027018	0.000361157	0.00257753	0.000828624	0.00353961	0.0025285	0.00808889	0	0	0	0	0	0	0	0	0	0	0	0	0	0	0	0	0	0
k__Bacteria; p__Bacteroidetes; c__Bacteroidia; o__Bacteroidales; f__Prevotellaceae; g__Prevotella; s__	533	0.00647832	4.3134	0.0542074	0.00272644	0.131252	0.00848721	0	0.00875427	0.02999	0.0104735	0.0263481	0.00801003	0.00176981	0.00657409	0.000866666	0	0.0221445	0.142019	0.00956602	0.492388	0	0.0306671	0	0	0	0.000249874	0	0.00452667	0	0	0	0	0
k__Bacteria; p__Bacteroidetes; c__Bacteroidia; o__Bacteroidales; f__Prevotellaceae; g__Prevotella; s__	534	0.000898693	3.0852	0.0914524	0.010776	0.061339	0.0318944	0.06582	0.0962969	0.0137792	0.103291	0.268923	0.0944631	0.135685	0.0935544	0.100822	0.116764	0.0524476	0.0404359	0.0573961	0.0406559	0	0.114305	0	0	0	0	0	0.025514	0	0.000269635	0	0	0
k__Bacteria; p__Bacteroidetes; c__Bacteroidia; o__Bacteroidales; f__Prevotellaceae; g__Prevotella; s__	535	0.0646966	0.354086	0.751592	0.58802	0.859656	1.24049	0.127768	0.105051	1.18798	0.720508	1.00123	0.365147	0.803492	3.49944	0.651733	0.757261	0.285548	0.368854	0.0956602	0.552619	0.0930452	0.649586	0.24103	0.626285	0.00173311	0.00399799	0.248359	0.135389	0.955491	0.00296598	4.5911	0.00261553	0.0926509
k__Bacteria; p__Bacteroidetes; c__Bacteroidia; o__Bacteroidales; f__Prevotellaceae; g__Prevotella; s__	536	0.000622117	3.68335	0.0992045	0.00772206	0.0935779	0.0245769	0.0309741	0.253874	0.025397	0.129294	0.091932	0.083691	0.108843	0.345898	0.0595111	0.00588465	0.0268065	0.0591745	0.0892829	0.0783003	0	0.0892135	0.00392984	0	0.000247587	0	0	0.00699577	0	0	0	0	0
k__Bacteria; p__Bacteroidetes; c__Bacteroidia; o__Bacteroidales; f__Prevotellaceae; g__Prevotella; s__	537	0.000967903	#DIV/0!	0.0136248	0	0.0119817	0	0.00387177	0	0.0162108	0.00902892	0.0114557	0.0259636	0.009144	0.00910259	0.0216667	0	0.0268065	0.000986242	0.0414528	0.0150577	0	0	0	0	0	0	0	0	0	0	0	0	0
k__Bacteria; p__Bacteroidetes; c__Bacteroidia; o__Bacteroidales; f__Prevotellaceae; g__Prevotella; s__	538	1	#DIV/0!	0	0	0	0	0	0	0	0	0	0	0	0	0	0	0	0	0	0	0	0	0	0	0	0	0	0	0	0	0	0	0
k__Bacteria; p__Bacteroidetes; c__Bacteroidia; o__Bacteroidales; f__Prevotellaceae; g__Prevotella; s__	539	0.661359	-1.9292	0.000480867	0.00183135	0.000873532	0.00616061	0	0	0.0013509	0	0.00114557	0	0.000294968	0	0	0.000929155	0	0	0	0.00301155	0	0.0223034	0	0	0	0	0	0.00123455	0	0.000269635	0	0	0
k__Bacteria; p__Bacteroidetes; c__Bacteroidia; o__Bacteroidales; f__Prevotellaceae; g__Prevotella; s__	540	0.00461852	2.74881	0.0439219	0.00653443	0.0339511	0.0231695	0	0.0962969	0.00486325	0.050562	0.0618608	0.0472316	0.0247773	0.107208	0.0476666	0.0808365	0	0.0276148	0.0223207	0.0436675	0	0.0836377	0.00130995	0	0	0	0	0	0	0	0	0	0
k__Bacteria; p__Bacteroidetes; c__Bacteroidia; o__Bacteroidales; f__Prevotellaceae; g__Prevotella; s__	541	0.76241	-0.116547	0.0128567	0.0139384	0.0170173	0.0212606	0	0	0.041878	0.00613967	0.0398086	0.0433647	0.000884904	0.00455129	0.026	0.000619437	0.00932401	0.00591745	0	0.00150577	0.0117945	0.0195155	0	0	0.0151028	0	0.0765851	0.0279831	0.0220668	0	0.00815182	0	0
k__Bacteria; p__Bacteroidetes; c__Bacteroidia; o__Bacteroidales; f__Prevotellaceae; g__Prevotella; s__	542	0.00737679	1.98591	0.129297	0.0326415	0.121998	0.0443384	0.0348459	0.0262628	0.214253	0.0328653	0.138328	0.041155	0.325645	0.423776	0.144444	0.0802171	0.13986	0.00690369	0.0510188	0.150577	0.00917347	0.072486	0.049778	0.00594198	0.011389	0.00324837	0.0055811	0.130451	0.0286868	0	0.107604	0	0
k__Bacteria; p__Bacteroidetes; c__Bacteroidia; o__Bacteroidales; f__Prevotellaceae; g__Prevotella; s__	543	0.0010873	0.996182	0.0592048	0.0296808	0.0455433	0.106197	0.0580765	0.0700341	0.0761909	0.189969	0.0713118	0.070433	0.0294968	0.0738321	0.0768444	0.0399537	0.011655	0.0108487	0.00956602	0.0406559	0	0	0	0	0	0	0	0.383121	0.00220668	0	0	0.000523106	0
k__Bacteria; p__Bacteroidetes; c__Bacteroidia; o__Bacteroidales; f__Prevotellaceae; g__Prevotella; s__	544	0.00221618	#DIV/0!	0.0145757	0	0.0204582	0	0.0154871	0	0.0218846	0.00216694	0.0506915	0.0113245	0.0135685	0.0106197	0.0681777	0.000619437	0.0034965	0	0	0.0060231	0	0	0	0	0	0	0	0	0	0	0	0	0
k__Bacteria; p__Bacteroidetes; c__Bacteroidia; o__Bacteroidales; f__Prevotellaceae; g__Prevotella; s__	545	0.00903911	2.67372	0.0210567	0.00330005	0.0312661	0.00580816	0.0542047	0	0.00486325	0.0288925	0.117421	0.0215442	0.00471949	0.00960829	0.00346667	0.02199	0.00582751	0.00197248	0.0127547	0.00752887	0	0.00278792	0	0.00356519	0	0	0.000620122	0.01358	0.00441335	0	0.017934	0	0
k__Bacteria; p__Bacteroidetes; c__Bacteroidia; o__Bacteroidales; f__Prevotellaceae; g__Prevotella; s__	546	0.365528	-6.42509	0.000230878	0.0198393	0.000650991	0.0334937	0	0	0.00243162	0	0	0	0.000294968	0.000505699	0	0	0	0	0	0	0.0982872	0.0418188	0	0	0	0	0.0725543	0.0436207	0	0	0.00163036	0	0
k__Bacteria; p__Bacteroidetes; c__Bacteroidia; o__Bacteroidales; f__Prevotellaceae; g__Prevotella; s__	547	0.00187704	2.74143	0.0143414	0.00214456	0.0123256	0.00773231	0.0232306	0.0175085	0.00513343	0.00758429	0.00286393	0.0135342	0.0412955	0.0207337	0.0144444	0.00650409	0.002331	0	0.0350754	0.0105404	0	0.0278792	0	0	0	0	0	0	0	0	0	0	0
k__Bacteria; p__Bacteroidetes; c__Bacteroidia; o__Bacteroidales; f__Prevotellaceae; g__Prevotella; s__	548	0.000514711	-6.81885	0.0128925	1.45551	0.0325487	1.45731	0.123897	0	0.000810541	0	0.00343671	0.0110483	0.000589936	0.0020228	0.00664444	0.00154859	0.02331	0.000986242	0.00318867	0.00301155	0.570066	0.00557585	1.37282	2.52178	0.332756	1.92953	1.24676	0.0164606	2.59505	1.00412	0.384766	1.58919	5.35275
k__Bacteria; p__Bacteroidetes; c__Bacteroidia; o__Bacteroidales; f__Prevotellaceae; g__Prevotella; s__	549	0.000458554	8.68173	0.0978582	0.000238306	0.123439	0.000770843	0.259408	0.105051	0.0121581	0.132183	0.459374	0.0939107	0.0799363	0.0566383	0.0335111	0.0322107	0.00815851	0.0621332	0.0127547	0.0225866	0	0.00278792	0	0	0	0	0.000310061	0	0	0	0	0	0
k__Bacteria; p__Bacteroidetes; c__Bacteroidia; o__Bacteroidales; f__Prevotellaceae; g__Prevotella; s__	550	0.00162797	-3.55994	0.0137906	0.162641	0.0232554	0.144641	0.0464612	0.00875427	0.0837559	0.00975124	0.00544146	0.00303829	0.00412955	0.0025285	0.00202222	0.000929155	0.0011655	0.00197248	0.00956602	0.013552	0.129739	0.128244	0.0445382	0.0534778	0.0673436	0.235382	0.321533	0.107406	0.540636	0.00107854	0.117386	0.119268	0.248304
k__Bacteria; p__Bacteroidetes; c__Bacteroidia; o__Bacteroidales; f__Prevotellaceae; g__Prevotella; s__	551	0.000702657	3.958	0.348137	0.0224013	0.479402	0.0779113	0.522689	1.87341	0.200474	0.195386	0.457083	0.704883	0.169017	0.103163	0.113244	0.130701	0.155012	0.0621332	0.0542075	0.132508	0	0.28158	0	0	0	0.000499749	0.000310061	0	0.00882671	0	0	0	0
k__Bacteria; p__Bacteroidetes; c__Bacteroidia; o__Bacteroidales; f__Prevotellaceae; g__Prevotella; s__	552	0.00187704	0.316232	0.0343451	0.0275848	0.0315091	0.0964397	0.0813071	0.0350171	0.00540361	0.111236	0.0317896	0.0403264	0.0324465	0.020228	0.0228222	0.0641117	0.0174825	0.00493121	0.00318867	0.0105404	0	0.34849	0.00654973	0	0	0	0	0.00329213	0	0.000269635	0	0	0
k__Bacteria; p__Bacteroidetes; c__Bacteroidia; o__Bacteroidales; f__Prevotellaceae; g__Prevotella; s__	553	0.125016	-0.29244	0.276983	0.339224	0.197439	0.741486	0.247793	0.0175085	0.261805	0.361157	0.600279	0.145562	0.744794	0.29634	0.179978	0.150833	0.155012	0.0769269	0.376264	0.263511	0.272583	0.142184	0.360235	0.142608	0.00767519	0.392303	0.0542607	0.00617274	0.0198601	0.0124032	0.0978218	0.133392	2.76841
k__Bacteria; p__Bacteroidetes; c__Bacteroidia; o__Bacteroidales; f__Prevotellaceae; g__Prevotella; s__	554	0.731306	-1.64402	0.000101363	0.000316796	0.000264928	0.000767441	0	0	0	0	0	0.000552416	0	0	0.000866666	0	0	0	0	0	0	0	0.00261989	0.0011884	0	0	0.000310061	0	0	0	0	0	0
k__Bacteria; p__Bacteroidetes; c__Bacteroidia; o__Bacteroidales; f__Prevotellaceae; g__Prevotella; s__	555	0.000497244	-6.57669	0.0164091	1.56627	0.0394077	1.8271	0.0232306	0.0350171	0.00108072	0	0.000572785	0.1486	0.00294968	0.0010114	0.00462222	0.000309718	0.00815851	0.000986242	0.00318867	0	0.652627	0.0613343	0.914343	0.480112	4.68063	2.10494	0.837475	0.0181067	0.712757	5.74187	0.295096	3.0246	0.837564
k__Bacteria; p__Bacteroidetes; c__Bacteroidia; o__Bacteroidales; f__Prevotellaceae; g__Prevotella; s__	556	0.0684362	0.178203	0.276408	0.24429	0.265342	0.609032	0.627226	0.0175085	0.91267	0.232946	0.20878	0.251625	0.45543	0.447544	0.394622	0.0309718	0.0536131	0.147936	0	0.0888407	0.0013105	0.454431	0.0995559	0.0285215	0.00148552	0.00124937	0.0297659	0.348142	0	0.00053927	2.21077	0	0
k__Bacteria; p__Bacteroidetes; c__Bacteroidia; o__Bacteroidales; f__Prevotellaceae; g__Prevotella; s__	557	0.0257688	2.28014	0.0273628	0.0056334	0.0357857	0.0137324	0.00387177	0.131314	0.00486325	0.0400884	0.0131741	0.0541368	0.0250723	0.00758549	0	0	0	0.0187386	0.0255094	0.0587252	0	0.0223034	0.00392984	0	0	0.000499749	0	0.0465013	0	0	0	0	0
k__Bacteria; p__Bacteroidetes; c__Bacteroidia; o__Bacteroidales; f__Prevotellaceae; g__Prevotella; s__	558	0.913955	-5.15283	0.0013902	0.0494577	0.00260639	0.118416	0	0.00875427	0	0	0.0040095	0.00138104	0.000294968	0.000505699	0	0	0	0	0	0.00451732	0	0.328975	0.0104796	0	0	0	0.000620122	0.302876	0	0	0	0	0
k__Bacteria; p__Bacteroidetes; c__Bacteroidia; o__Bacteroidales; f__Prevotellaceae; g__Prevotella; s__	559	0.0240997	3.94748	0.00293026	0.00018993	0.00413536	0.000684804	0	0	0.000810541	0.00686198	0.00114557	0.00138104	0.00648929	0.0141596	0.000288889	0.00495549	0	0.00493121	0	0	0	0	0	0	0	0	0	0.0024691	0	0	0	0	0
k__Bacteria; p__Bacteroidetes; c__Bacteroidia; o__Bacteroidales; f__Prevotellaceae; g__Prevotella; s__	560	0.000551991	4.55745	0.129739	0.00550984	0.131888	0.0168149	0.0271024	0.227611	0.0497132	0.0617578	0.0899273	0.0941869	0.0575187	0.413662	0.0803111	0.00216803	0.032634	0.0828443	0.200886	0.396019	0	0.0613343	0	0	0	0.000499749	0.000620122	0.00370364	0.00220668	0.000269635	0	0.000523106	0.00247069
k__Bacteria; p__Bacteroidetes; c__Bacteroidia; o__Bacteroidales; f__Prevotellaceae; g__Prevotella; s__	561	0.00187704	3.61004	0.1077	0.00882031	0.1449	0.0308605	0.135512	0.218857	0.0151301	0	0.0289257	0.174287	0.0858356	0.0283192	0.0502666	0.561519	0.0594406	0.0670645	0.0510188	0.0316213	0	0.111517	0	0	0.000247587	0.000999498	0	0	0	0.000269635	0.00163036	0	0
k__Bacteria; p__Bacteroidetes; c__Bacteroidia; o__Bacteroidales; f__Prevotellaceae; g__Prevotella; s__	562	0.000514711	4.15962	0.127929	0.00715809	0.096978	0.0223278	0.147127	0.0350171	0.108072	0.165049	0.111693	0.26295	0.224471	0.348932	0.0756889	0.0727838	0.0477855	0.0236698	0.146679	0.0210808	0.010484	0.0808498	0.00130995	0	0	0	0	0.000411516	0	0	0	0	0
k__Bacteria; p__Bacteroidetes; c__Bacteroidia; o__Bacteroidales; f__Prevotellaceae; g__Prevotella; s__	563	0.798659	#DIV/0!	3.85972e-05	0	0.000144418	0	0	0	0.000540361	0	0	0	0	0	0	0	0	0	0	0	0	0	0	0	0	0	0	0	0	0	0	0	0
k__Bacteria; p__Bacteroidetes; c__Bacteroidia; o__Bacteroidales; f__Prevotellaceae; g__Prevotella; s__	564	0.000551991	3.75793	0.0563075	0.00416214	0.04159	0.00997338	0.00774353	0.12256	0.0594397	0.0433388	0.119999	0.0466792	0.0386408	0.0536041	0.111511	0.101897	0.0454545	0.00493121	0.0159434	0.0165635	0	0.0306671	0	0	0	0	0	0.0218103	0	0	0.00163036	0	0
k__Bacteria; p__Bacteroidetes; c__Bacteroidia; o__Bacteroidales; f__Prevotellaceae; g__Prevotella; s__	565	0.786803	#NUM!	0	2.38509e-05	0	8.59955e-05	0	0	0	0	0	0	0	0	0	0	0	0	0	0	0	0	0	0	0	0	0.000310061	0	0	0	0	0	0
k__Bacteria; p__Bacteroidetes; c__Bacteroidia; o__Bacteroidales; f__Prevotellaceae; g__Prevotella; s__	566	0.0010873	1.83637	2.38161	0.666911	2.5816	2.21688	2.91931	0.971724	1.26958	3.747	4.67794	0.971976	10.1661	2.7596	1.73651	0.738988	1.29604	0.191331	0.771659	1.12481	0	0.59104	0.0130995	0.0011884	0.00346621	0.0122438	0.00372073	8.02538	0.00882671	0.00377489	0.00163036	0.000523106	0.00494138
k__Bacteria; p__Bacteroidetes; c__Bacteroidia; o__Bacteroidales; f__Prevotellaceae; g__Prevotella; s__	567	0.0173895	3.0105	0.203097	0.0252031	0.429817	0.0238233	0.0116153	0.0437713	1.6662	0.325402	0.0790444	0.0323163	0.143059	0.115805	0.052	0.0154859	0.124709	0.0453671	0.00637735	0.182199	0.00655248	0.00557585	0.024889	0.0558546	0.00792277	0.0827084	0.0483695	0.02716	0.0286868	0.00997649	0.00489109	0.0151701	0.00988277
k__Bacteria; p__Bacteroidetes; c__Bacteroidia; o__Bacteroidales; f__Prevotellaceae; g__Prevotella; s__	568	0.746609	-6.1388	4.09132e-05	0.00288289	0.000153083	0.0100293	0	0	0	0	0.000572785	0	0	0	0	0	0	0	0	0	0	0.036243	0	0	0	0	0	0.00123455	0	0	0	0	0
k__Bacteria; p__Bacteroidetes; c__Bacteroidia; o__Bacteroidales; f__Prevotellaceae; g__Prevotella; s__	569	0.000622117	3.26941	0.225788	0.0234159	0.154699	0.0608785	0.147127	0.358925	0.10537	0.306622	0.445341	0.0856245	0.243938	0.227565	0.253933	0.589084	0.12704	0.0769269	0.0956602	0.0978754	0	0.206306	0.00130995	0	0.000495173	0	0	0.0950602	0	0	0	0	0.00123535
k__Bacteria; p__Bacteroidetes; c__Bacteroidia; o__Bacteroidales; f__Prevotellaceae; g__Prevotella; s__	570	0.000458554	-6.61944	0.0293112	2.88193	0.0663346	2.10602	0.251665	0.0262628	0.00027018	0.00108347	0.00286393	0.0615944	0.000884904	0.0030342	0.0118444	0.00278747	0.0337995	0.00788994	0.00637735	0	0.922589	0.0446068	4.17611	5.04237	2.37089	2.67241	1.18939	0.620977	1.07465	6.64057	4.47372	5.48319	2.75359
k__Bacteria; p__Bacteroidetes; c__Bacteroidia; o__Bacteroidales; f__Prevotellaceae; g__Prevotella; s__	571	0.000497244	4.76226	1.92132	0.0707973	1.5692	0.167512	1.4674	5.85661	1.0999	1.96072	4.14525	1.66912	3.59448	1.45641	1.6926	1.52289	0.213287	0.902411	0.296547	1.02092	0	0.476735	0.00785968	0	0.00247587	0.00299849	0.000930184	0.417689	0	0.00269635	0	0.00156932	0.00741207
k__Bacteria; p__Bacteroidetes; c__Bacteroidia; o__Bacteroidales; f__Prevotellaceae; g__Prevotella; s__	572	0.000497244	5.23415	0.766975	0.0203772	0.905087	0.0484877	2.16432	0.175085	0.286391	1.16979	0.764382	0.140314	0.269011	0.453612	0.4108	1.25808	3.15734	0.105528	0.0637735	0.319224	0	0.150548	0	0	0.00074276	0.000999498	0.000310061	0.104525	0	0.00053927	0.00163036	0.00313863	0.00247069
k__Bacteria; p__Bacteroidetes; c__Bacteroidia; o__Bacteroidales; f__Prevotellaceae; g__Prevotella; s__	573	0.575106	#NUM!	0	0.00316392	0	0.0111627	0	0	0	0	0	0	0	0	0	0	0	0	0	0	0	0	0	0	0	0	0.040308	0.000823032	0	0	0	0	0
k__Bacteria; p__Bacteroidetes; c__Bacteroidia; o__Bacteroidales; f__Prevotellaceae; g__Prevotella; s__	574	0.0939245	#DIV/0!	0.000461802	0	0.000980317	0	0	0	0.00027018	0.000722314	0.0037231	0.000552416	0	0	0.000577778	0.000619437	0	0	0	0	0	0	0	0	0	0	0	0	0	0	0	0	0
k__Bacteria; p__Bacteroidetes; c__Bacteroidia; o__Bacteroidales; f__Prevotellaceae; g__Prevotella; s__	575	0.0021887	4.42866	0.0160254	0.000744132	0.0148266	0.00231787	0.00774353	0.0262628	0	0.00722314	0.0037231	0.0502699	0.00855407	0.0121368	0.0283111	0.0309718	0.002331	0.0197248	0	0.0271039	0	0.00836377	0.00130995	0	0	0	0	0	0	0	0	0	0
k__Bacteria; p__Bacteroidetes; c__Bacteroidia; o__Bacteroidales; f__Prevotellaceae; g__Prevotella; s__	576	0.000514711	10.2534	0.0386385	3.16551e-05	0.054338	0.000114134	0	0.00875427	0.000540361	0.00144463	0.00973735	0.041155	0.0595835	0.187109	0.121333	0.0148665	0.032634	0.00788994	0.00318867	0.0527021	0	0	0	0	0	0	0	0.000411516	0	0	0	0	0
k__Bacteria; p__Bacteroidetes; c__Bacteroidia; o__Bacteroidales; f__Prevotellaceae; g__Prevotella; s__	577	0.000458554	4.6549	0.40928	0.0162464	0.226216	0.0257393	0.871148	0.455222	0.177238	0.194664	0.616317	0.427294	0.483452	0.454118	0.621978	0.212467	0.374126	0.145964	0.0860942	0.609839	0.0694563	0.0418188	0	0.0142608	0.00074276	0.00124937	0.000310061	0.065431	0	0	0.017934	0	0
k__Bacteria; p__Bacteroidetes; c__Bacteroidia; o__Bacteroidales; f__Prevotellaceae; g__Prevotella; s__	578	0.385692	-2.05974	0.0712917	0.297223	0.096328	0.939482	0.0309741	0.0525256	0.371768	0.164688	0.0592833	0.0930821	0.0448351	0.0793948	0.0112667	0.0148665	0.011655	0.00493121	0.0286981	0.0301155	0.0838717	3.42078	0.115275	0.0653618	0.000247587	0.000499749	0.0040308	0.0111109	0.0970938	0.000808904	0.0635842	0	0.00123535
k__Bacteria; p__Bacteroidetes; c__Bacteroidia; o__Bacteroidales; f__Prevotellaceae; g__Prevotella; s__	579	0.0127329	-0.85333	0.0150364	0.0271657	0.0165284	0.0720076	0	0.0175085	0.0424183	0.0209471	0.0564193	0.0118769	0.00147484	0.00455129	0.00606666	0.02199	0.002331	0.00295873	0.0159434	0.0060231	0	0.245337	0	0	0	0	0	0.107817	0	0	0	0	0
k__Bacteria; p__Bacteroidetes; c__Bacteroidia; o__Bacteroidales; f__Prevotellaceae; g__Prevotella; s__	580	0.2764	#DIV/0!	0.00089619	0	0.00204542	0	0	0	0.00351235	0	0	0.00718141	0	0	0.000866666	0	0	0.000986242	0	0	0	0	0	0	0	0	0	0	0	0	0	0	0
k__Bacteria; p__Bacteroidetes; c__Bacteroidia; o__Bacteroidales; f__Prevotellaceae; g__Prevotella; s__	581	0.0492719	#DIV/0!	0.00232017	0	0.00469341	0	0	0	0.0132388	0	0.0040095	0.000828624	0.000589936	0.000505699	0.013	0.000309718	0	0	0	0	0	0	0	0	0	0	0	0	0	0	0	0	0
k__Bacteria; p__Bacteroidetes; c__Bacteroidia; o__Bacteroidales; f__Prevotellaceae; g__Prevotella; s__	582	0.520786	-1.61241	0.000313016	0.000957083	0.000418642	0.00272393	0	0	0.00027018	0.000722314	0.00143196	0.000552416	0.000589936	0.000505699	0	0.000309718	0	0	0	0	0	0	0.00130995	0	0	0.00124937	0	0	0	0	0	0	0.00988277
k__Bacteria; p__Bacteroidetes; c__Bacteroidia; o__Bacteroidales; f__Prevotellaceae; g__Prevotella; s__	583	0.000767978	8.01797	0.110092	0.000424722	0.136758	0.000780829	0.0425894	0	0.00162108	0.0274479	0.0105965	0.133961	0.495546	0.200763	0.0676	0.286489	0.0734266	0.0660782	0.0478301	0.0873349	0	0.00278792	0	0	0.00074276	0.000999498	0.000310061	0.000411516	0	0.000269635	0	0	0
k__Bacteria; p__Bacteroidetes; c__Bacteroidia; o__Bacteroidales; f__Prevotellaceae; g__Prevotella; s__	584	0.125016	0.893419	0.00557714	0.00300238	0.0122469	0.0108252	0	0	0.0097265	0.00108347	0.0148924	0.000828624	0	0	0.00144444	0	0	0.00493121	0	0.0451732	0	0.0390309	0	0	0	0	0	0	0	0	0	0	0
k__Bacteria; p__Bacteroidetes; c__Bacteroidia; o__Bacteroidales; f__Prevotellaceae; g__Prevotella; s__	585	0.0010873	10.1022	0.0211277	1.92211e-05	0.0186274	6.93027e-05	0.0271024	0.00875427	0.0097265	0.000722314	0.0037231	0.0179535	0.0519143	0.052087	0.0288889	0.0411925	0.018648	0	0.0350754	0	0	0	0	0	0	0.000249874	0	0	0	0	0	0	0
k__Bacteria; p__Bacteroidetes; c__Bacteroidia; o__Bacteroidales; f__Prevotellaceae; g__Prevotella; s__	586	0.0428566	-0.926554	0.00631837	0.0120095	0.0112029	0.0433009	0	0	0.000810541	0.00577851	0.0249162	0.00193346	0.00619432	0.0025285	0.000288889	0.0083624	0	0	0	0.0376444	0	0.156124	0	0	0	0	0	0	0	0	0	0	0
k__Bacteria; p__Bacteroidetes; c__Bacteroidia; o__Bacteroidales; f__Prevotellaceae; g__Prevotella; s__	587	0.16748	#DIV/0!	0.00254204	0	0.00702417	0	0	0	0.00108072	0.00288925	0.0266345	0	0	0	0	0	0	0.00197248	0	0.00301155	0	0	0	0	0	0	0	0	0	0	0	0	0
k__Bacteria; p__Bacteroidetes; c__Bacteroidia; o__Bacteroidales; f__Prevotellaceae; g__Prevotella; s__	588	0.174404	0.914669	0.169819	0.0900831	0.185675	0.091998	0.0193588	0.210102	0.739214	0.363685	0.162385	0.0859007	0.175211	0.146653	0.0973555	0.0662797	0.111888	0.0700232	0.0255094	0.103898	0.013105	0.0975773	0.104796	0.0903181	0.0131221	0.0434782	0.170534	0.193824	0.319968	0.000808904	0.0733664	0.0094159	0.0407664
k__Bacteria; p__Bacteroidetes; c__Bacteroidia; o__Bacteroidales; f__Prevotellaceae; g__Prevotella; s__	589	0.0987395	1.87543	0.00273518	0.000745462	0.00494526	0.00184392	0.00387177	0	0.00108072	0	0.00229114	0	0.00206477	0.0010114	0.00433333	0.00154859	0	0.00295873	0.019132	0	0	0.00557585	0	0	0	0	0	0.00411516	0	0	0	0	0
k__Bacteria; p__Bacteroidetes; c__Bacteroidia; o__Bacteroidales; f__Prevotellaceae; g__Prevotella; s__	590	0.00047227	-6.57435	0.00239495	0.22823	0.00849227	0.379758	0	0	0.00027018	0	0	0	0	0.000505699	0.000866666	0	0	0	0.0318867	0	0.196574	0.571524	0.0956261	0.0653618	0.00544691	0.0307346	0.0430985	0.0843608	0.0551669	0.202226	0.216838	0.0115083	1.38853
k__Bacteria; p__Bacteroidetes; c__Bacteroidia; o__Bacteroidales; f__Prevotellaceae; g__Prevotella; s__	591	0.632473	1.55164	0.00214622	0.000732124	0.00345159	0.00117571	0	0	0.0110774	0.00108347	0.00458228	0.00165725	0.00442452	0	0.00722222	0	0	0	0	0	0	0	0	0.0011884	0.00222828	0.00249874	0.000310061	0.00329213	0	0	0	0	0
k__Bacteria; p__Bacteroidetes; c__Bacteroidia; o__Bacteroidales; f__Prevotellaceae; g__Prevotella; s__	592	0.0939245	4.58516	0.00241869	0.000100765	0.00537865	0.000363314	0	0	0.00108072	0.000361157	0.000286393	0	0.0073742	0.0020228	0	0	0	0.0197248	0	0.00301155	0	0	0.00130995	0	0	0	0	0	0	0	0	0	0
k__Bacteria; p__Bacteroidetes; c__Bacteroidia; o__Bacteroidales; f__Prevotellaceae; g__Prevotella; s__	593	1	#DIV/0!	0	0	0	0	0	0	0	0	0	0	0	0	0	0	0	0	0	0	0	0	0	0	0	0	0	0	0	0	0	0	0
k__Bacteria; p__Bacteroidetes; c__Bacteroidia; o__Bacteroidales; f__Prevotellaceae; g__Prevotella; s__	594	0.000458554	#DIV/0!	0.047784	0	0.0595864	0	0.0696918	0.227611	0.0326918	0.00216694	0.0117421	0.0668423	0.00353961	0.0212394	0.0996666	0.0309718	0.0617716	0.00986242	0.019132	0.0120462	0	0	0	0	0	0	0	0	0	0	0	0	0
k__Bacteria; p__Bacteroidetes; c__Bacteroidia; o__Bacteroidales; f__Prevotellaceae; g__Prevotella; s__	595	0.000551991	-5.42455	0.0528536	2.27	0.0994232	1.81082	0.158742	0.0350171	0.00783523	0.00144463	0.00229114	0.151362	0.00147484	0.00758549	0.00606666	0.00247775	0.013986	0.00197248	0.00637735	0.343317	0.218853	0.0195155	4.3071	2.1403	4.43353	3.62593	5.58513	0.0897105	1.44096	2.16247	1.10865	3.07952	1.29835
k__Bacteria; p__Bacteroidetes; c__Bacteroidia; o__Bacteroidales; f__Prevotellaceae; g__Prevotella; s__	596	0.000551991	4.8604	0.0262139	0.000902414	0.0474099	0.00308143	0.00774353	0.0350171	0.0178319	0.0209471	0.0105965	0.0207156	0.00589936	0.186603	0.0346667	0.00526521	0.00699301	0.000986242	0.00318867	0.0105404	0	0.0111517	0	0	0	0	0.000310061	0	0	0.000269635	0	0	0
k__Bacteria; p__Bacteroidetes; c__Bacteroidia; o__Bacteroidales; f__Prevotellaceae; g__Prevotella; s__	597	0.00403061	1.59149	0.0325905	0.0108145	0.0202883	0.0284918	0.0193588	0.0612799	0.022425	0.00975124	0.0303576	0.0220966	0.046015	0.0576497	0.0291778	0.0749518	0.0151515	0.0315597	0.00637735	0.0301155	0	0.0418188	0	0	0.000990347	0.000249874	0	0.0975293	0	0	0	0	0
k__Bacteria; p__Bacteroidetes; c__Bacteroidia; o__Bacteroidales; f__Prevotellaceae; g__Prevotella; s__	598	0.2764	-3.53247	0.00773	0.0894452	0.00943856	0.135289	0.00774353	0	0.00378253	0.00144463	0.00229114	0.0251349	0.00235974	0.030342	0.00635555	0.00247775	0.00582751	0	0.0159434	0.00451732	0.127118	0.00278792	0.0864565	0.470605	0.227285	0.0164917	0.0886775	0.00329213	0.136814	0	0.00326073	0	0
k__Bacteria; p__Bacteroidetes; c__Bacteroidia; o__Bacteroidales; f__Prevotellaceae; g__Prevotella; s__	599	0.0712928	-1.90021	0.603523	2.25275	0.386591	2.37955	0.26328	1.12055	0.668697	0.249559	0.307013	0.257702	1.52439	0.327187	0.753422	0.620056	0.854312	0.311652	0.848187	0.343317	2.91585	0.836377	5.41794	0.433765	0.0368904	3.61019	0.337967	8.12291	2.09855	1.29452	2.89553	0.0277246	1.25758
k__Bacteria; p__Bacteroidetes; c__Bacteroidia; o__Bacteroidales; f__Prevotellaceae; g__Prevotella; s__	600	0.000514711	-6.30793	0.00485324	0.384511	0.0079905	0.580514	0.0193588	0.00875427	0	0	0.000286393	0.0251349	0.000884904	0.0010114	0	0.000309718	0.00582751	0	0.00637735	0	0.254236	0.00557585	0.0170293	0.203216	0.636545	0.11894	2.18035	0.0440322	0.0264801	0.603443	0.423895	0.136531	0.348367
k__Bacteria; p__Bacteroidetes; c__Bacteroidia; o__Bacteroidales; f__Prevotellaceae; g__Prevotella; s__	601	0.0492719	#DIV/0!	0.00242571	0	0.00439806	0	0	0	0.0151301	0.00830661	0.000286393	0.00138104	0	0.0010114	0.00288889	0.00495549	0	0	0	0	0	0	0	0	0	0	0	0	0	0	0	0	0
k__Bacteria; p__Bacteroidetes; c__Bacteroidia; o__Bacteroidales; f__Prevotellaceae; g__Prevotella; s__	602	0.385692	-1.92902	0.000300679	0.00114497	0.000788157	0.00225584	0	0	0.00027018	0.000361157	0	0	0	0	0	0.000619437	0	0.00295873	0	0	0	0	0	0.00237679	0	0.00224887	0	0.000411516	0	0.00808904	0	0.000523106	0.00123535
k__Bacteria; p__Bacteroidetes; c__Bacteroidia; o__Bacteroidales; f__Prevotellaceae; g__Prevotella; s__	603	0.113613	-0.642874	0.0041798	0.0065265	0.00446222	0.0197357	0.0116153	0	0.0140494	0.0025281	0.00286393	0.00497174	0.00235974	0	0.0026	0.00464578	0.002331	0.000986242	0.00956602	0	0.0720773	0	0.00392984	0	0	0.00249874	0.00217043	0.00123455	0	0.00188744	0	0.00104621	0
k__Bacteria; p__Bacteroidetes; c__Bacteroidia; o__Bacteroidales; f__Prevotellaceae; g__Prevotella; s__	604	0.296935	4.01916	0.00347716	0.000214456	0.0101302	0.000773231	0	0	0.0383656	0.00433388	0.00257753	0.00138104	0	0	0.00202222	0	0	0	0	0	0	0.00278792	0	0	0	0	0	0	0	0	0	0	0
k__Bacteria; p__Bacteroidetes; c__Bacteroidia; o__Bacteroidales; f__Prevotellaceae; g__Prevotella; s__	605	0.16748	#DIV/0!	0.00929505	0	0.027429	0	0.0116153	0	0.103479	0.0119182	0.00114557	0	0	0	0	0	0	0.00197248	0	0	0	0	0	0	0	0	0	0	0	0	0	0	0
k__Bacteria; p__Bacteroidetes; c__Bacteroidia; o__Bacteroidales; f__Prevotellaceae; g__Prevotella; s__	606	0.00305382	2.75176	0.0270091	0.00401004	0.0265456	0.0106031	0.0464612	0.00875427	0.0651135	0.0140851	0.0461092	0.00911486	0.00324465	0.0879917	0.0245555	0.0207511	0.00699301	0.0404359	0	0.00451732	0	0.036243	0	0	0	0.000249874	0	0.0156376	0	0	0	0	0
k__Bacteria; p__Bacteroidetes; c__Bacteroidia; o__Bacteroidales; f__Prevotellaceae; g__Prevotella; s__	607	0.0939245	#DIV/0!	0.000526163	0	0.000995422	0	0	0	0.00108072	0	0.0037231	0.000552416	0.000884904	0.000505699	0	0.000619437	0	0	0	0	0	0	0	0	0	0	0	0	0	0	0	0	0
k__Bacteria; p__Bacteroidetes; c__Bacteroidia; o__Bacteroidales; f__Prevotellaceae; g__Prevotella; s__	608	0.000458554	-6.8493	0.01036	1.19455	0.0139555	1.11388	0.0425894	0.00875427	0.00108072	0.00144463	0.000286393	0.0276208	0.00147484	0.0025285	0.0078	0.000309718	0.025641	0	0.0255094	0	0.948799	0.103153	0.74405	1.3619	0.667246	1.31534	1.92703	0.0489704	0.823091	0.670042	0.855941	1.62006	4.44354
k__Bacteria; p__Bacteroidetes; c__Bacteroidia; o__Bacteroidales; f__Prevotellaceae; g__Prevotella; s__	609	0.00502736	#DIV/0!	0.0107065	0	0.0117564	0	0.00387177	0	0.00351235	0.00830661	0.00572785	0.0232015	0.0082591	0.0197223	0.0147333	0	0	0.0384634	0	0.0240924	0	0	0	0	0	0	0	0	0	0	0	0	0
k__Bacteria; p__Bacteroidetes; c__Bacteroidia; o__Bacteroidales; f__Prevotellaceae; g__Prevotella; s__	610	0.55066	0.112565	0.152804	0.141335	0.135598	0.142545	0.139384	0.113805	0.124283	0.0422554	0.0973735	0.121532	0.263701	0.579531	0.151378	0.115835	0.110723	0.0374772	0.181754	0.060231	0.248994	0.0585464	0.347136	0.255505	0.0106462	0.0279859	0.0164332	0.230449	0.0308935	0.00242671	0.226621	0	0.381722
k__Bacteria; p__Bacteroidetes; c__Bacteroidia; o__Bacteroidales; f__Prevotellaceae; g__Prevotella; s__	611	0.000458554	6.68599	0.0434797	0.000422282	0.0228595	0.00144913	0.0696918	0.00875427	0.0256671	0.0697033	0.0753213	0.0743	0.046015	0.0399502	0.0586444	0.019822	0.0337995	0.0128211	0.0350754	0.0391501	0	0	0.00523979	0	0	0.000249874	0	0	0	0	0	0	0
k__Bacteria; p__Bacteroidetes; c__Bacteroidia; o__Bacteroidales; f__Prevotellaceae; g__Prevotella; s__	612	0.00288348	1.62091	0.0119336	0.00387995	0.015955	0.0133075	0.0232306	0	0.00378253	0.0245587	0.0114557	0.00441933	0.0604684	0.010114	0.00693333	0.00185831	0.0034965	0.000986242	0.0127547	0.00301155	0	0	0	0	0	0.00149925	0	0.0481474	0	0.000269635	0	0.000523106	0
k__Bacteria; p__Bacteroidetes; c__Bacteroidia; o__Bacteroidales; f__Prevotellaceae; g__Prevotella; s__	613	0.000514711	6.46466	0.123773	0.00140142	0.173504	0.00460857	0.255537	0.0175085	0.0451201	0.0119182	0.248016	0.039774	0.0109138	0.00505699	0.178244	0.613552	0.254079	0.00394497	0.0446414	0.00451732	0	0.0167275	0	0	0	0.000499749	0.000310061	0.000411516	0	0.000269635	0	0	0
k__Bacteria; p__Bacteroidetes; c__Bacteroidia; o__Bacteroidales; f__Prevotellaceae; g__Prevotella; s__	614	0.296935	2.27959	0.00156727	0.000322789	0.00280792	0.000619757	0	0	0.0097265	0.000722314	0.00143196	0	0.00471949	0.00404559	0	0.000309718	0	0.000986242	0	0	0	0	0.00130995	0	0	0	0.00124024	0.00164606	0	0	0	0	0
k__Bacteria; p__Bacteroidetes; c__Bacteroidia; o__Bacteroidales; f__Prevotellaceae; g__Prevotella; s__	615	0.000622117	5.80957	0.048112	0.000857822	0.0411378	0.00309292	0.0542047	0.0262628	0.0443096	0.0476727	0.0558466	0.0784431	0.018583	0.0111254	0.00606666	0	0.037296	0.128211	0.133924	0.0316213	0	0.0111517	0	0	0	0	0	0	0	0	0	0	0
k__Bacteria; p__Bacteroidetes; c__Bacteroidia; o__Bacteroidales; f__Prevotellaceae; g__Prevotella; s__	616	0.00327621	6.98932	0.00646412	5.08762e-05	0.00759185	0.000128496	0	0	0.00540361	0.0148074	0.0183291	0.00303829	0.0244823	0.00657409	0.00577778	0.00123887	0.002331	0.000986242	0	0.00752887	0	0	0	0	0	0.000249874	0	0.000411516	0	0	0	0	0
k__Bacteria; p__Bacteroidetes; c__Bacteroidia; o__Bacteroidales; f__Prevotellaceae; g__Prevotella; s__	617	0.00647832	-2.3679	0.0203507	0.105048	0.0197122	0.0973368	0.0232306	0.0262628	0.0751102	0.00541735	0.0163244	0.0182297	0.0100289	0.0030342	0.0118444	0.0309718	0.044289	0.00493121	0.00318867	0.0120462	0.0117945	0.119881	0.116585	0.141419	0.0626394	0.0564716	0.0158131	0.210285	0.0242735	0.210854	0.0374984	0.332172	0.0259423
k__Bacteria; p__Bacteroidetes; c__Bacteroidia; o__Bacteroidales; f__Prevotellaceae; g__Prevotella; s__	618	1	-3.19038	0.132512	1.20964	0.105777	1.90551	0.267152	0.0437713	0.175887	0.266895	0.343098	0.104683	0.13952	0.208854	0.0450666	0.0312816	0.0827506	0.0128211	0.0159434	0.11745	0.0393149	5.75985	0.183392	3.23125	0.000495173	0.128186	0.0790656	3.01312	3.13348	0	0.0114125	0	0.145771
k__Bacteria; p__Bacteroidetes; c__Bacteroidia; o__Bacteroidales; f__Prevotellaceae; g__Prevotella; s__	619	0.632473	1.0313	0.000162195	7.93568e-05	0.000308496	0.000198333	0	0	0.000810541	0	0.000286393	0	0.000884904	0	0.000288889	0	0	0	0	0	0	0	0	0	0	0	0.000620122	0.000411516	0	0	0	0	0
k__Bacteria; p__Bacteroidetes; c__Bacteroidia; o__Bacteroidales; f__Prevotellaceae; g__Prevotella; s__	620	0.0197237	0.526577	0.00497936	0.00345667	0.00991659	0.0084379	0.00774353	0	0.00027018	0.00288925	0.00515507	0.00110483	0.00206477	0.0015171	0.000866666	0.0384051	0.002331	0.000986242	0.00637735	0	0	0.0223034	0	0	0	0	0	0.0226334	0	0	0	0	0
k__Bacteria; p__Bacteroidetes; c__Bacteroidia; o__Bacteroidales; f__Prevotellaceae; g__Prevotella; s__	621	0.00139711	7.30893	0.0710302	0.000447956	0.0744119	0.00154226	0.162614	0.0875427	0.0154003	0.103652	0.0355127	0.161029	0.0758067	0.0156767	0.0765555	0.0164151	0.241259	0.00295873	0	0	0	0.00557585	0	0	0.000247587	0	0	0	0	0	0	0	0
k__Bacteria; p__Bacteroidetes; c__Bacteroidia; o__Bacteroidales; f__Prevotellaceae; g__Prevotella; s__	622	0.000458554	#DIV/0!	0.0355444	0	0.0318621	0	0.0696918	0.0262628	0.0245864	0.0213083	0.0673023	0.0295543	0.00973394	0.106197	0.0182	0.0068138	0.025641	0.00295873	0.00956602	0.0798061	0	0	0	0	0	0	0	0	0	0	0	0	0
k__Bacteria; p__Bacteroidetes; c__Bacteroidia; o__Bacteroidales; f__Prevotellaceae; g__Prevotella; s__	623	0.34072	0.462681	0.000732328	0.000531404	0.00137042	0.00179596	0	0	0.00486325	0.000361157	0.00171836	0.000276208	0	0.0010114	0.00202222	0	0	0	0	0	0	0	0	0	0	0.00649674	0	0.000411516	0	0	0	0	0
k__Bacteria; p__Bacteroidetes; c__Bacteroidia; o__Bacteroidales; f__Prevotellaceae; g__Prevotella; s__	624	0.0327944	-0.3926	0.0329449	0.0432486	0.0306934	0.134839	0.0735636	0.0875427	0.0567379	0.0144463	0.0329352	0.0035907	0.0135685	0.0030342	0.0361111	0.0786685	0.044289	0	0.00318867	0.013552	0.0183469	0.490674	0.00654973	0	0	0	0	0.0349788	0	0.000269635	0.0114125	0	0
k__Bacteria; p__Bacteroidetes; c__Bacteroidia; o__Bacteroidales; f__Prevotellaceae; g__Prevotella; s__	625	0.103375	2.43358	0.00265913	0.000492221	0.00570027	0.00154428	0	0	0.000540361	0.00397273	0	0.00386691	0	0.0010114	0.00404444	0.000929155	0.0011655	0.0216973	0	0	0	0.00557585	0	0	0	0	0	0.000823032	0	0	0	0	0
k__Bacteria; p__Bacteroidetes; c__Bacteroidia; o__Bacteroidales; f__Prevotellaceae; g__Prevotella; s__	626	0.0492719	#DIV/0!	0.00128386	0	0.00193801	0	0	0	0	0.00144463	0.000286393	0.00303829	0.00147484	0.00455129	0.00115556	0	0	0	0	0.0060231	0	0	0	0	0	0	0	0	0	0	0	0	0
k__Bacteria; p__Bacteroidetes; c__Bacteroidia; o__Bacteroidales; f__Prevotellaceae; g__Prevotella; s__	627	0.0341146	1.74689	0.424349	0.126432	0.453356	0.158298	0.0348459	0.253874	1.44979	0.395106	0.566485	0.148324	0.874875	1.25211	0.300155	0.12048	0.104895	0.182455	0.0542075	0.20328	0.0733878	0.0780618	0.525289	0.221042	0.000247587	0.00149925	0.267893	0.265016	0.0110334	0.00053927	0.171188	0	0.028413
k__Bacteria; p__Bacteroidetes; c__Bacteroidia; o__Bacteroidales; f__Prevotellaceae; g__Prevotella; s__	628	0.0145849	0.189506	0.025435	0.0223041	0.0216699	0.0550224	0.06582	0.0175085	0.0402569	0.00866776	0.0724573	0.0129818	0.0262521	0.00859689	0.0320667	0.0300427	0.020979	0	0.0159434	0.00451732	0	0.117093	0	0	0	0	0.170534	0.00205758	0	0.000269635	0	0	0
k__Bacteria; p__Bacteroidetes; c__Bacteroidia; o__Bacteroidales; f__Prevotellaceae; g__Prevotella; s__	629	0.0919693	2.13416	0.00560346	0.00127647	0.0114311	0.00311594	0	0	0.0437692	0.0025281	0.00143196	0.00662899	0.00560439	0.0030342	0	0.00309718	0	0.0108487	0	0.00150577	0	0.00836377	0	0	0	0	0	0.00823032	0	0	0	0	0
k__Bacteria; p__Bacteroidetes; c__Bacteroidia; o__Bacteroidales; f__Prevotellaceae; g__Prevotella; s__	630	0.977175	-0.627473	7.71944e-05	0.000119254	0.000288835	0.000429977	0	0	0.00108072	0	0	0	0	0	0	0	0	0	0	0	0	0	0	0	0	0	0.00155031	0	0	0	0	0	0
k__Bacteria; p__Bacteroidetes; c__Bacteroidia; o__Bacteroidales; f__Prevotellaceae; g__Prevotella; s__	631	0.0020408	-5.18603	0.0270847	0.98599	0.054108	1.31676	0.17423	0.0700341	0.00027018	0.00144463	0.00171836	0.113798	0.000884904	0.00455129	0.00231111	0.000619437	0.00932401	0	0	0	0.0576618	0	0.576376	2.06187	2.91484	0.448774	4.32535	0.141561	0.172121	0.156388	0.423895	0.687884	0.851153
k__Bacteria; p__Bacteroidetes; c__Bacteroidia; o__Bacteroidales; f__Prevotellaceae; g__Prevotella; s__	632	0.786803	0.484338	0.000608435	0.000434924	0.00142877	0.000792863	0	0	0	0.000722314	0.00544146	0.000552416	0.000294968	0	0.000577778	0.000929155	0	0	0	0	0	0	0	0.00237679	0	0	0	0.000411516	0	0	0.00163036	0	0.00123535
k__Bacteria; p__Bacteroidetes; c__Bacteroidia; o__Bacteroidales; f__Prevotellaceae; g__Prevotella; s__	633	0.746609	-1.06581	0.0133142	0.0278713	0.0108394	0.0483563	0	0.0262628	0.0372849	0.0238364	0.0108829	0.0104959	0.018288	0.0227565	0.0109778	0.00557493	0.00815851	0.000986242	0.00637735	0.00451732	0.0144155	0.153336	0.00261989	0.0142608	0	0	0.00651128	0.112344	0.0154467	0.00134817	0.035868	0	0.00617673
k__Bacteria; p__Bacteroidetes; c__Bacteroidia; o__Bacteroidales; f__Prevotellaceae; g__Prevotella; s__	634	0.00266011	2.84486	1.18526	0.164979	1.81755	0.34688	1.73068	1.8559	0.145627	1.04302	7.08364	0.984405	0.269306	0.489517	0.198467	1.80721	0.136364	0.119335	0.350754	0.379455	0.0432464	0.122669	0.00261989	0.303041	0.00173311	0.000999498	0.0437186	0.350612	0.0198601	0.000269635	1.25049	0.000523106	0.00494138
k__Bacteria; p__Bacteroidetes; c__Bacteroidia; o__Bacteroidales; f__Prevotellaceae; g__Prevotella; s__	635	0.2764	#DIV/0!	0.00521654	0	0.0120845	0	0.0425894	0	0	0	0.000286393	0.0174011	0	0	0	0	0	0	0.0127547	0	0	0	0	0	0	0	0	0	0	0	0	0	0
k__Bacteria; p__Bacteroidetes; c__Bacteroidia; o__Bacteroidales; f__Prevotellaceae; g__Prevotella; s__	636	0.038126	1.52488	0.00987394	0.00343129	0.0182675	0.0123717	0	0	0.00162108	0.000722314	0.0555602	0.00662899	0.0315616	0	0.000288889	0.00123887	0.039627	0.000986242	0	0	0	0.0446068	0	0	0	0	0	0	0	0	0	0	0
k__Bacteria; p__Bacteroidetes; c__Bacteroidia; o__Bacteroidales; f__Prevotellaceae; g__Prevotella; s__	637	0.591868	0.249492	0.0434457	0.0365462	0.0570525	0.0516473	0	0.0350171	0.231004	0.0610355	0.0360855	0.014639	0.0586986	0.0429844	0.0286	0.014247	0.020979	0.00197248	0.0223207	0.0406559	0.00524198	0.0418188	0.0392984	0.0320867	0.00420897	0.0097451	0.0651128	0.0588468	0.191981	0	0.0114125	0.000523106	0.0148241
k__Bacteria; p__Bacteroidetes; c__Bacteroidia; o__Bacteroidales; f__Prevotellaceae; g__Prevotella; s__	638	0.34072	-0.0577962	0.00206034	0.00214456	0.00562583	0.00773231	0	0	0.000540361	0.000361157	0	0	0	0.00455129	0.00231111	0	0	0	0	0.0210808	0	0.0278792	0	0	0	0	0	0	0	0	0	0	0
k__Bacteria; p__Bacteroidetes; c__Bacteroidia; o__Bacteroidales; f__Prevotellaceae; g__Prevotella; s__	639	0.600367	#DIV/0!	0.000128788	0	0.000334835	0	0	0	0.00108072	0.000722314	0	0	0	0	0	0	0	0	0	0	0	0	0	0	0	0	0	0	0	0	0	0	0
k__Bacteria; p__Bacteroidetes; c__Bacteroidia; o__Bacteroidales; f__Prevotellaceae; g__Prevotella; s__	640	0.786803	#NUM!	0	1.90451e-05	0	6.86682e-05	0	0	0	0	0	0	0	0	0	0	0	0	0	0	0	0	0	0	0.000247587	0	0	0	0	0	0	0	0
k__Bacteria; p__Bacteroidetes; c__Bacteroidia; o__Bacteroidales; f__Prevotellaceae; g__Prevotella; s__	641	0.00699371	3.87911	0.00977482	0.000664325	0.00960557	0.00129357	0	0.00875427	0.00432289	0.00361157	0.0274937	0.00662899	0.0212377	0.0207337	0.00808889	0.00991099	0	0.00197248	0	0.0240924	0.00393149	0	0	0	0	0.00274862	0.000310061	0.00164606	0	0	0	0	0
k__Bacteria; p__Bacteroidetes; c__Bacteroidia; o__Bacteroidales; f__Prevotellaceae; g__Prevotella; s__	642	0.0712928	-5.94743	0.000359458	0.0221822	0.00105621	0.0443001	0	0	0	0	0	0.00386691	0	0	0	0	0.0011655	0	0	0	0	0	0.0170293	0	0.070067	0.154672	0	0	0.0242735	0	0.00326073	0.0141239	0.00494138
k__Bacteria; p__Bacteroidetes; c__Bacteroidia; o__Bacteroidales; f__Prevotellaceae; g__Prevotella; s__	643	0.000514711	#DIV/0!	0.00673279	0	0.00891541	0	0.0193588	0.0262628	0.0013509	0.00180578	0.00630064	0.00469554	0.000589936	0.0015171	0.00173333	0.000309718	0.0034965	0	0.0223207	0.00451732	0	0	0	0	0	0	0	0	0	0	0	0	0
k__Bacteria; p__Bacteroidetes; c__Bacteroidia; o__Bacteroidales; f__Prevotellaceae; g__Prevotella; s__	644	0.575106	-0.419608	0.000592991	0.000793164	0.00118138	0.001831	0	0	0.00108072	0.00108347	0.000859178	0.000276208	0.00442452	0	0.000577778	0	0	0	0	0	0	0.00557585	0	0	0	0	0.000620122	0.00411516	0	0	0	0	0
k__Bacteria; p__Bacteroidetes; c__Bacteroidia; o__Bacteroidales; f__Prevotellaceae; g__Prevotella; s__	645	0.00139711	-4.69741	0.0658716	1.70907	0.127135	1.21695	0.0774353	0.0437713	0.495241	0.0393661	0.0037231	0.105511	0.00530942	0.0318591	0.00375555	0.0034069	0.0314685	0.0108487	0.0223207	0.0481848	0.205748	0.00557585	1.23397	1.30961	2.69449	2.30409	2.52793	0.0432092	0.721584	3.26555	1.74286	3.46034	2.70294
k__Bacteria; p__Bacteroidetes; c__Bacteroidia; o__Bacteroidales; f__Prevotellaceae; g__Prevotella; s__	646	0.00288348	3.01564	0.181631	0.0224591	0.212697	0.0588624	0.336844	0.814147	0.0407972	0.316373	0.220809	0.144733	0.203233	0.00455129	0.165244	0.158576	0.0780886	0	0.0127547	0.046679	0	0.0920014	0	0	0	0	0	0.199174	0	0.000269635	0	0.000523106	0
k__Bacteria; p__Bacteroidetes; c__Bacteroidia; o__Bacteroidales; f__Prevotellaceae; g__Prevotella; s__	647	0.0153234	4.0108	0.00447765	0.000277766	0.0063606	0.000787766	0.0232306	0	0.00486325	0.00650082	0.00257753	0.00856245	0.000884904	0.000505699	0.0101111	0	0	0.00394497	0	0.00150577	0	0.00278792	0	0	0	0	0	0.000823032	0	0	0	0	0
k__Bacteria; p__Bacteroidetes; c__Bacteroidia; o__Bacteroidales; f__Prevotellaceae; g__Prevotella; s__	648	0.00235092	3.90827	0.0228253	0.00152023	0.0202666	0.00540733	0	0	0.022425	0.00325041	0.0352263	0.0560702	0.0126836	0.04703	0.0453555	0.0306621	0.04662	0.00295873	0.0127547	0.00451732	0	0.0195155	0	0	0.000247587	0	0	0	0	0	0	0	0
k__Bacteria; p__Bacteroidetes; c__Bacteroidia; o__Bacteroidales; f__Prevotellaceae; g__Prevotella; s__	649	0.000898693	-5.7415	0.0921527	4.93028	0.146295	4.96354	0.24005	0.140068	0.0878086	0.00902892	0.00544146	0.539987	0.0200578	0.00455129	0.0366889	0.00526521	0.109557	0.00394497	0.00637735	0.0813118	1.44155	0.0529705	2.71683	5.0186	14.9305	7.45051	1.80177	0.0395055	5.79915	14.1965	1.57819	7.40979	1.65783
k__Bacteria; p__Bacteroidetes; c__Bacteroidia; o__Bacteroidales; f__Prevotellaceae; g__Prevotella; s__	650	0.55066	-1.74483	0.0579374	0.19418	0.035529	0.318251	0.0193588	0.0612799	0.0221548	0.0498396	0.11198	0.0629754	0.120052	0.0945658	0.0444889	0.0232289	0.0757576	0.0236698	0.0159434	0.0858292	1.17814	0.144972	0.0641874	0.0225795	0.0190642	0.0177411	0.0793757	0.362134	0.108127	0.00404452	0.316291	0.00261553	0.205067
k__Bacteria; p__Bacteroidetes; c__Bacteroidia; o__Bacteroidales; f__Prevotellaceae; g__Prevotella; s__	651	0.113613	-1.99734	0.251798	1.00534	0.410057	1.09434	0.313613	0.350171	0.124013	1.63026	0.316464	0.09833	0.0908501	0.13401	0.117867	0.0467675	0.0769231	0.0690369	0.0318867	0.124979	0.0786297	0.117093	1.13572	3.0423	0.870267	0.826335	3.20448	0.227157	2.01249	0.00943722	0.810291	0.689453	0.0457078
k__Bacteria; p__Bacteroidetes; c__Bacteroidia; o__Bacteroidales; f__Prevotellaceae; g__Prevotella; s__	652	0.879697	-0.725097	0.370972	0.613222	0.393125	0.705849	0.286511	0.166331	0.672479	0.338404	1.61411	0.179535	0.40971	0.428833	0.175644	0.153311	0.391608	0.101583	0.0542075	0.221349	1.40092	0.409825	0.275089	0.591821	0.0193118	0.13943	1.34722	0.234976	2.29053	0.025076	1.07115	0.00470795	0.16183
k__Bacteria; p__Bacteroidetes; c__Bacteroidia; o__Bacteroidales; f__Prevotellaceae; g__Prevotella; s__	653	0.0222458	0.830606	0.00877208	0.00493248	0.0142783	0.0177843	0.0387177	0	0.00108072	0.000361157	0	0.0392215	0.00265471	0.000505699	0.000577778	0.0068138	0.02331	0	0.00956602	0	0	0.0641222	0	0	0	0	0	0	0	0	0	0	0
k__Bacteria; p__Bacteroidetes; c__Bacteroidia; o__Bacteroidales; f__Prevotellaceae; g__Prevotella; s__	654	0.385692	3.39657	0.00066672	6.33101e-05	0.00155128	0.000228268	0	0	0.00567379	0	0.000859178	0.000828624	0	0	0	0	0	0.00197248	0	0	0	0	0	0	0	0	0	0.000823032	0	0	0	0	0
k__Bacteria; p__Bacteroidetes; c__Bacteroidia; o__Bacteroidales; f__Prevotellaceae; g__Prevotella; s__	655	0.00461852	3.02483	0.0125671	0.00154409	0.01229	0.00540074	0.0154871	0	0.0118879	0.00469504	0.0168972	0.00883866	0.0309716	0.0399502	0.00375555	0.00123887	0	0.0266285	0.00956602	0.0060231	0	0.0195155	0	0	0.000247587	0	0.000310061	0	0	0	0	0	0
k__Bacteria; p__Bacteroidetes; c__Bacteroidia; o__Bacteroidales; f__Prevotellaceae; g__Prevotella; s__	656	0.0712928	1.43328	0.00245883	0.000910477	0.00273136	0.00172403	0.00387177	0	0.00108072	0.000722314	0.000859178	0.00414312	0.00324465	0.0010114	0.00173333	0.00216803	0	0	0.00956602	0.0060231	0.00524198	0	0	0.00356519	0	0.000249874	0.000310061	0.0024691	0	0	0	0	0
k__Bacteria; p__Bacteroidetes; c__Bacteroidia; o__Bacteroidales; f__Prevotellaceae; g__Prevotella; s__	657	0.00575111	-0.234835	0.236151	0.277895	0.171643	0.883326	0.209075	0.700341	0.229113	0.141573	0.31675	0.114903	0.17993	0.197728	0.1742	0.498027	0.188811	0.0315597	0.114792	0.209303	0	3.20054	0.0576376	0.00237679	0	0.000499749	0	0.346908	0.00441335	0.000269635	0	0	0
k__Bacteria; p__Bacteroidetes; c__Bacteroidia; o__Bacteroidales; f__Prevotellaceae; g__Prevotella; s__	658	0.76241	-1.85774	0.161309	0.584647	0.257583	0.885515	0.402664	0.0612799	0.0837559	0.28098	0.955692	0.151362	0.185535	0.0237679	0.0115556	0.0083624	0.0524476	0.00788994	0.0255094	0.00752887	0.782366	0.0278792	2.58976	0.146173	1.21218	0.228385	2.2036	0.0456783	0.364102	0.000269635	0	0	0
k__Bacteria; p__Bacteroidetes; c__Bacteroidia; o__Bacteroidales; f__Prevotellaceae; g__Prevotella; s__	659	0.786803	#NUM!	0	4.77017e-05	0	0.000171991	0	0	0	0	0	0	0	0	0	0	0	0	0	0	0	0	0	0	0	0	0.000620122	0	0	0	0	0	0
k__Bacteria; p__Bacteroidetes; c__Bacteroidia; o__Bacteroidales; f__Prevotellaceae; g__Prevotella; s__	660	0.0021887	3.25102	0.0127146	0.00133552	0.0114572	0.00165063	0.0309741	0	0.0181021	0.00613967	0.00544146	0.0104959	0.00206477	0.0262964	0.0026	0.0114596	0.037296	0.00986242	0.0127547	0.00451732	0.0013105	0.00278792	0	0.00356519	0	0.00274862	0	0.000823032	0	0	0.00489109	0	0.00123535
k__Bacteria; p__Bacteroidetes; c__Bacteroidia; o__Bacteroidales; f__Prevotellaceae; g__Prevotella; s__	661	0.00139711	-4.63283	0.0210338	0.521839	0.0426141	0.464631	0.0967942	0	0.137252	0.00830661	0.000572785	0.0383929	0.000589936	0.0025285	0.000577778	0.000929155	0.0011655	0.000986242	0.00637735	0	0.180848	0	1.34662	0.749878	1.34019	1.02124	0.428505	0.011934	0.152261	0.553291	0.197274	0.470795	0.331073
k__Bacteria; p__Bacteroidetes; c__Bacteroidia; o__Bacteroidales; f__Prevotellaceae; g__Prevotella; s__	662	0.0939245	#DIV/0!	0.00197427	0	0.00422247	0	0	0	0	0.00288925	0.000572785	0.0154676	0.00560439	0.000505699	0.0026	0	0	0	0	0	0	0	0	0	0	0	0	0	0	0	0	0	0
k__Bacteria; p__Bacteroidetes; c__Bacteroidia; o__Bacteroidales; f__Prevotellaceae; g__Prevotella; s__	663	0.600367	-2.49768	0.00220422	0.0124489	0.0022848	0.0287769	0.00774353	0	0.00351235	0.00144463	0.00143196	0.00110483	0.00265471	0.00606839	0.000288889	0.000929155	0	0.000986242	0.00318867	0.00150577	0.0144155	0.103153	0.00261989	0.0320867	0	0.000249874	0.000620122	0	0	0.00053927	0.00815182	0	0
k__Bacteria; p__Bacteroidetes; c__Bacteroidia; o__Bacteroidales; f__Prevotellaceae; g__Prevotella; s__	664	0.051879	1.29707	0.0443436	0.0180457	0.0532215	0.0616583	0.0735636	0	0.0375551	0.12496	0.0231978	0.0403264	0.0174031	0.15525	0.122489	0.012079	0.013986	0	0	0	0	0.223034	0.0104796	0	0.000247587	0	0.000310061	0	0	0	0	0.000523106	0
k__Bacteria; p__Bacteroidetes; c__Bacteroidia; o__Bacteroidales; f__Prevotellaceae; g__Prevotella; s__	665	0.575106	-0.351854	0.110674	0.141242	0.0848685	0.185985	0.0735636	0.0350171	0.263156	0.214888	0.220522	0.0787193	0	0.189637	0.0681777	0.170035	0.0524476	0.0226836	0.0446414	0.115945	0.505851	0.21467	0.154574	0.371968	0.000247587	0	0.0372073	0.448141	0.0154467	0	0.0880397	0	0
k__Bacteria; p__Bacteroidetes; c__Bacteroidia; o__Bacteroidales; f__Prevotellaceae; g__Prevotella; s__	666	0.16748	#DIV/0!	0.00502844	0	0.0167038	0	0	0	0.062952	0.00361157	0.00171836	0.00110483	0	0.0010114	0	0	0	0	0	0	0	0	0	0	0	0	0	0	0	0	0	0	0
k__Bacteria; p__Bacteroidetes; c__Bacteroidia; o__Bacteroidales; f__Prevotellaceae; g__Prevotella; s__	667	0.00266011	3.62574	0.0162742	0.00131839	0.0113697	0.00463127	0.0116153	0	0.00783523	0.0148074	0.0206203	0.0069052	0.0289068	0.0232622	0.0312	0.0380954	0.0128205	0.0197248	0	0.0120462	0	0.0167275	0	0	0	0	0	0.000411516	0	0	0	0	0
k__Bacteria; p__Bacteroidetes; c__Bacteroidia; o__Bacteroidales; f__Prevotellaceae; g__Prevotella; s__	668	0.038126	2.49648	0.0173115	0.00306776	0.0273064	0.00540763	0.0232306	0	0.00918614	0.00288925	0.0077326	0.0226491	0.00147484	0.0556269	0.0970666	0.00371662	0.002331	0.00591745	0	0.0105404	0.0183469	0.00278792	0	0	0.000247587	0	0	0.00288061	0.00882671	0.000269635	0.00652146	0	0
k__Bacteria; p__Bacteroidetes; c__Bacteroidia; o__Bacteroidales; f__Prevotellaceae; g__Prevotella; s__	669	0.000514711	#DIV/0!	0.0115649	0	0.0168356	0	0.00387177	0.0437713	0.00297198	0.0025281	0.00801899	0.00414312	0.000294968	0.0020228	0.00231111	0.00619437	0.0547786	0	0.0159434	0.0150577	0	0	0	0	0	0	0	0	0	0	0	0	0
k__Bacteria; p__Bacteroidetes; c__Bacteroidia; o__Bacteroidales; f__Prevotellaceae; g__Prevotella; s__	670	0.296935	-5.43606	0.000186425	0.00807085	0.00047703	0.022666	0	0	0	0	0	0	0	0	0.00144444	0	0.0011655	0	0	0	0.0183469	0	0.00130995	0.00237679	0	0	0.00124024	0	0.0816471	0	0	0	0
k__Bacteria; p__Bacteroidetes; c__Bacteroidia; o__Bacteroidales; f__Prevotellaceae; g__Prevotella; s__	671	0.385692	5.23769	0.000718598	1.90451e-05	0.00166189	6.86682e-05	0	0	0.00513343	0	0.000572785	0	0	0	0.00404444	0.000309718	0	0	0	0	0	0	0	0	0.000247587	0	0	0	0	0	0	0	0
k__Bacteria; p__Bacteroidetes; c__Bacteroidia; o__Bacteroidales; f__Prevotellaceae; g__Prevotella; s__	672	0.0010873	3.29272	0.0580503	0.00592376	0.0659531	0.0154411	0.0929224	0.00875427	0.013509	0.0227529	0.0168972	0.0414312	0.153383	0.0753492	0.0335111	0.0300427	0.242424	0.0197248	0.0318867	0.0301155	0	0.0223034	0.00130995	0	0	0	0.000310061	0.0530855	0	0	0	0	0
k__Bacteria; p__Bacteroidetes; c__Bacteroidia; o__Bacteroidales; f__Prevotellaceae; g__Prevotella; s__	673	0.162808	-5.78787	0.000160444	0.00886437	0.000408182	0.018405	0	0	0.00108072	0	0	0	0	0	0	0	0.0011655	0	0	0	0.00262099	0	0	0	0.0621442	0.0322338	0.0055811	0	0	0.0121336	0	0.000523106	0
k__Bacteria; p__Bacteroidetes; c__Bacteroidia; o__Bacteroidales; f__Prevotellaceae; g__Prevotella; s__	674	0.798659	#DIV/0!	2.21227e-05	0	8.27757e-05	0	0	0	0	0	0	0	0	0	0	0.000309718	0	0	0	0	0	0	0	0	0	0	0	0	0	0	0	0	0
k__Bacteria; p__Bacteroidetes; c__Bacteroidia; o__Bacteroidales; f__Prevotellaceae; g__Prevotella; s__	675	0.000794953	4.33084	0.0210511	0.00104607	0.0137059	0.00288186	0	0.0262628	0.0167512	0.0534512	0.00830539	0.0185059	0.0353961	0.0273078	0.0101111	0.0244677	0.020979	0.024656	0.0255094	0.00301155	0	0.00278792	0	0	0	0	0	0.0102879	0	0	0	0.000523106	0
k__Bacteria; p__Bacteroidetes; c__Bacteroidia; o__Bacteroidales; f__Prevotellaceae; g__Prevotella; s__	676	0.2764	#DIV/0!	0.0023478	0	0.00559067	0	0	0	0.00432289	0	0	0.00552416	0	0	0.00231111	0	0	0.0207111	0	0	0	0	0	0	0	0	0	0	0	0	0	0	0
k__Bacteria; p__Bacteroidetes; c__Bacteroidia; o__Bacteroidales; f__Prevotellaceae; g__Prevotella; s__	677	0.038126	0.508238	0.0186361	0.0131027	0.0149381	0.0259779	0.00774353	0.0612799	0.00459307	0.018419	0.0286393	0.0165725	0.0312666	0.020228	0.0112667	0.0207511	0.00815851	0.000986242	0.0159434	0.0150577	0.00262099	0.0641222	0.00523979	0.0011884	0	0.000249874	0	0.0757189	0	0	0.0211947	0	0
k__Bacteria; p__Bacteroidetes; c__Bacteroidia; o__Bacteroidales; f__Prevotellaceae; g__Prevotella; s__	678	0.00162797	3.38099	0.013405	0.00128673	0.0149113	0.00463938	0.00387177	0	0.00702469	0.00758429	0.0294984	0.0568988	0.00796413	0.00455129	0.0078	0.000309718	0.013986	0.0216973	0.0159434	0.0105404	0	0.0167275	0	0	0	0	0	0	0	0	0	0	0
k__Bacteria; p__Bacteroidetes; c__Bacteroidia; o__Bacteroidales; f__Prevotellaceae; g__Prevotella; s__	679	0.913955	1.76098	0.601508	0.177473	1.45027	0.145877	0.0851789	0.192594	5.54194	1.10044	0.555602	0.0574513	0.147779	0.179018	0.108044	0.0690672	0.199301	0.0670645	0.00318867	0.114439	0.0812507	0.20073	0.188632	0.330374	0.01436	0.0972012	0.262312	0.396701	0.452369	0.00485343	0.0489109	0.0700961	0.15936
k__Bacteria; p__Bacteroidetes; c__Bacteroidia; o__Bacteroidales; f__Prevotellaceae; g__Prevotella; s__	680	0.34072	0.807981	0.000394588	0.000225381	0.000614921	0.000724547	0	0	0.00162108	0.000722314	0.000286393	0.000276208	0.000884904	0	0.00173333	0	0	0	0	0	0	0	0.00261989	0	0	0	0.000310061	0	0	0	0	0	0
k__Bacteria; p__Bacteroidetes; c__Bacteroidia; o__Bacteroidales; f__Prevotellaceae; g__Prevotella; s__	681	1	#DIV/0!	0	0	0	0	0	0	0	0	0	0	0	0	0	0	0	0	0	0	0	0	0	0	0	0	0	0	0	0	0	0	0
k__Bacteria; p__Bacteroidetes; c__Bacteroidia; o__Bacteroidales; f__Prevotellaceae; g__Prevotella; s__	682	0.0341146	1.65484	0.0307007	0.00974967	0.064587	0.0270084	0.00387177	0.12256	0.00540361	0	0.0243434	0.000276208	0.0106188	0.00960829	0	0	0.002331	0.0108487	0.226396	0.013552	0	0.0947894	0	0	0	0	0	0.0316867	0	0.000269635	0	0	0
k__Bacteria; p__Bacteroidetes; c__Bacteroidia; o__Bacteroidales; f__Prevotellaceae; g__Prevotella; s__	683	0.047746	1.41554	0.00209206	0.000784247	0.0026769	0.00213395	0	0	0.00432289	0.00866776	0.00200475	0.000276208	0.00176981	0.000505699	0.00173333	0.000619437	0	0	0.00637735	0.00301155	0	0.00278792	0	0	0	0	0	0.00740729	0	0	0	0	0
k__Bacteria; p__Bacteroidetes; c__Bacteroidia; o__Bacteroidales; f__Prevotellaceae; g__Prevotella; s__	684	0.000458554	9.40725	0.223019	0.000328456	0.209008	0.000657492	0.0967942	0.175085	0.670318	0.120626	0.595697	0.265712	0.00796413	0.0996227	0.1404	0.00154859	0.193473	0.177524	0.475112	0.102393	0	0	0	0	0.000990347	0.000249874	0	0.000823032	0.00220668	0	0	0	0
k__Bacteria; p__Bacteroidetes; c__Bacteroidia; o__Bacteroidales; f__Prevotellaceae; g__Prevotella; s__	685	0.239594	0.77127	0.0041618	0.00243841	0.00546381	0.00609671	0	0	0.0013509	0	0.0100237	0.000552416	0.0165182	0.00353989	0.00982222	0	0	0.00591745	0	0.0105404	0	0.0195155	0	0	0	0.000249874	0	0.011934	0	0	0	0	0
k__Bacteria; p__Bacteroidetes; c__Bacteroidia; o__Bacteroidales; f__Prevotellaceae; g__Prevotella; s__	686	0.00060338	-7.62019	0.000276208	0.0543428	0.00103348	0.106955	0	0	0	0	0	0.00386691	0	0	0	0	0	0	0	0	0.0366939	0	0.00654973	0.0332751	0.152018	0.0109945	0.00527104	0.000823032	0.0110334	0.00728014	0.384766	0.0256322	0.032119
k__Bacteria; p__Bacteroidetes; c__Bacteroidia; o__Bacteroidales; f__Prevotellaceae; g__Prevotella; s__	687	0.038126	2.29232	0.012606	0.00257347	0.034492	0.00927877	0.00387177	0.131314	0.0137792	0.000361157	0.00343671	0.000828624	0	0	0.00173333	0	0.00932401	0.0118349	0	0	0	0.0334551	0	0	0	0	0	0	0	0	0	0	0
k__Bacteria; p__Bacteroidetes; c__Bacteroidia; o__Bacteroidales; f__Prevotellaceae; g__Prevotella; s__	688	0.0135798	4.28207	0.00932472	0.000479296	0.0125021	0.00101355	0	0	0.010537	0.00758429	0.0126013	0.00662899	0.018583	0.0015171	0.0459333	0.00433606	0.0198135	0	0	0.00301155	0	0.00278792	0.00261989	0	0	0	0	0.000823032	0	0	0	0	0
k__Bacteria; p__Bacteroidetes; c__Bacteroidia; o__Bacteroidales; f__Prevotellaceae; g__Prevotella; s__	689	0.135107	-0.299043	0.00966631	0.0118927	0.0163123	0.039267	0	0	0.0356638	0.0545347	0.0163244	0.00441933	0.00471949	0	0.000577778	0.000619437	0.004662	0.0138074	0	0	0.0013105	0.142184	0	0	0	0	0	0.0111109	0	0	0	0	0
k__Bacteria; p__Bacteroidetes; c__Bacteroidia; o__Bacteroidales; f__Prevotellaceae; g__Prevotella; s__	690	0.661359	-1.82437	0.000191379	0.000677775	0.000276617	0.00170241	0	0	0.000810541	0.000722314	0.000286393	0.000276208	0.000294968	0	0.000288889	0	0	0	0	0	0	0	0	0	0.00594208	0.00224887	0.000620122	0	0	0	0	0	0
k__Bacteria; p__Bacteroidetes; c__Bacteroidia; o__Bacteroidales; f__Prevotellaceae; g__Prevotella; s__	691	0.600367	#DIV/0!	0.000294027	0	0.000835729	0	0	0	0	0	0	0.00110483	0	0	0	0	0	0	0	0.00301155	0	0	0	0	0	0	0	0	0	0	0	0	0
k__Bacteria; p__Bacteroidetes; c__Bacteroidia; o__Bacteroidales; f__Prevotellaceae; g__Prevotella; s__	692	0.977175	1.65213	0.000618892	0.000196913	0.00223386	0.00048082	0	0	0.00837559	0	0	0	0	0	0.000288889	0	0	0	0	0	0.0013105	0	0	0	0	0.00124937	0	0	0	0	0	0	0
k__Bacteria; p__Bacteroidetes; c__Bacteroidia; o__Bacteroidales; f__Prevotellaceae; g__Prevotella; s__	693	0.011125	#DIV/0!	0.00071013	0	0.000990375	0	0	0	0.00027018	0.000361157	0.000859178	0.000552416	0.000294968	0	0.000288889	0	0.002331	0.00197248	0	0.00301155	0	0	0	0	0	0	0	0	0	0	0	0	0
k__Bacteria; p__Bacteroidetes; c__Bacteroidia; o__Bacteroidales; f__Prevotellaceae; g__Prevotella; s__	694	0.00123317	-8.48117	1.97291e-05	0.00705008	7.38197e-05	0.00985393	0	0	0	0	0	0.000276208	0	0	0	0	0	0	0	0	0.0117945	0	0.0366785	0.00831878	0.00916071	0.000499749	0.00713141	0	0.00441335	0.00161781	0.00163036	0.000523106	0.00988277
k__Bacteria; p__Bacteroidetes; c__Bacteroidia; o__Bacteroidales; f__Prevotellaceae; g__Prevotella; s__	695	0.047746	1.32952	0.026631	0.0105965	0.0283553	0.0308086	0.06582	0	0.019453	0.0664529	0.0100237	0	0.0796413	0.00606839	0.00953333	0	0.0268065	0.0453671	0	0.0436675	0	0.0278792	0	0	0	0	0	0.109875	0	0	0	0	0
k__Bacteria; p__Bacteroidetes; c__Bacteroidia; o__Bacteroidales; f__Prevotellaceae; g__Prevotella; s__	696	0.0197237	2.39403	0.0068635	0.00130578	0.00956744	0.00463417	0	0	0.00189126	0.000361157	0	0.0104959	0.000589936	0.0227565	0.0182	0	0.00699301	0.028601	0.00318867	0.00301155	0	0.0167275	0	0	0.000247587	0	0	0	0	0	0	0	0
k__Bacteria; p__Bacteroidetes; c__Bacteroidia; o__Bacteroidales; f__Prevotellaceae; g__Prevotella; s__	697	0.566815	-0.664895	0.00183237	0.00290514	0.00542224	0.00966771	0	0	0.00189126	0.000361157	0.00200475	0	0.000884904	0	0.0205111	0	0	0	0	0	0	0.00278792	0	0	0	0	0	0.0349788	0	0	0	0	0
k__Bacteria; p__Bacteroidetes; c__Bacteroidia; o__Bacteroidales; f__Prevotellaceae; g__Prevotella; s__	698	1	#DIV/0!	0	0	0	0	0	0	0	0	0	0	0	0	0	0	0	0	0	0	0	0	0	0	0	0	0	0	0	0	0	0	0
k__Bacteria; p__Bacteroidetes; c__Bacteroidia; o__Bacteroidales; f__Prevotellaceae; g__Prevotella; s__	699	0.661359	-4.28877	0.00549854	0.107473	0.014233	0.276408	0	0	0.0537659	0.000722314	0.000572785	0	0.000884904	0	0	0.000619437	0.0034965	0	0.00637735	0.0105404	0	0	0	0.0106956	0	0.000999498	0.0117823	0.0024691	0.00220668	0	0.93909	0	0.4299
k__Bacteria; p__Bacteroidetes; c__Bacteroidia; o__Bacteroidales; f__Prevotellaceae; g__Prevotella; s__	700	0.00118915	-6.21805	0.000725395	0.054	0.00131172	0.0506759	0.00387177	0	0	0	0	0.00193346	0.000294968	0	0.000866666	0	0	0	0.00318867	0	0.0314519	0	0.0510879	0.0332751	0.131716	0.127186	0.0589116	0.000411516	0.0132401	0.141019	0.00326073	0.0758503	0.0345897
k__Bacteria; p__Bacteroidetes; c__Bacteroidia; o__Bacteroidales; f__Prevotellaceae; g__Prevotella; s__	701	0.798659	#DIV/0!	3.85972e-05	0	0.000144418	0	0	0	0.000540361	0	0	0	0	0	0	0	0	0	0	0	0	0	0	0	0	0	0	0	0	0	0	0	0
k__Bacteria; p__Bacteroidetes; c__Bacteroidia; o__Bacteroidales; f__Prevotellaceae; g__Prevotella; s__	702	0.0010873	10.0057	0.0213236	2.07411e-05	0.0348862	7.47832e-05	0.00774353	0.00875427	0.00594397	0.00830661	0.112839	0.0881104	0.00973394	0.0182052	0.00346667	0.000309718	0.0034965	0	0	0.0316213	0	0	0	0	0	0	0	0	0	0.000269635	0	0	0
k__Bacteria; p__Bacteroidetes; c__Bacteroidia; o__Bacteroidales; f__Prevotellaceae; g__Prevotella; s__	703	0.661359	-5.06069	6.19183e-05	0.00206651	0.000159926	0.00481324	0	0	0	0.000361157	0	0	0	0.000505699	0	0	0	0	0	0	0	0.0111517	0.00130995	0	0	0	0	0.0144031	0	0	0	0	0
k__Bacteria; p__Bacteroidetes; c__Bacteroidia; o__Bacteroidales; f__Prevotellaceae; g__Prevotella; s__	704	1	#DIV/0!	0	0	0	0	0	0	0	0	0	0	0	0	0	0	0	0	0	0	0	0	0	0	0	0	0	0	0	0	0	0	0
k__Bacteria; p__Bacteroidetes; c__Bacteroidia; o__Bacteroidales; f__Prevotellaceae; g__Prevotella; s__	705	0.0492719	2.22753	0.00416569	0.000889477	0.00497142	0.00308551	0	0	0.00648433	0	0.00801899	0.00414312	0.00265471	0	0.00548889	0	0.0011655	0.00591745	0.00637735	0.0180693	0	0.0111517	0	0	0	0	0	0.000411516	0	0	0	0	0
k__Bacteria; p__Bacteroidetes; c__Bacteroidia; o__Bacteroidales; f__Prevotellaceae; g__Prevotella; s__	706	0.000514711	#DIV/0!	0.00977128	0	0.012534	0	0	0.00875427	0.00405271	0.00180578	0.00343671	0.00386691	0.00206477	0.000505699	0.00751111	0.0083624	0.0104895	0.00986242	0.0414528	0.0346328	0	0	0	0	0	0	0	0	0	0	0	0	0
k__Bacteria; p__Bacteroidetes; c__Bacteroidia; o__Bacteroidales; f__Prevotellaceae; g__Prevotella; s__	707	0.798659	#DIV/0!	1.92986e-05	0	7.22088e-05	0	0	0	0.00027018	0	0	0	0	0	0	0	0	0	0	0	0	0	0	0	0	0	0	0	0	0	0	0	0
k__Bacteria; p__Bacteroidetes; c__Bacteroidia; o__Bacteroidales; f__Prevotellaceae; g__Prevotella; s__	708	0.0363236	-4.71646	8.58901e-05	0.00225808	0.000178837	0.00290207	0	0	0	0.000361157	0	0.000552416	0	0	0.000288889	0	0	0	0	0	0	0	0	0.00237679	0.00445656	0.00524736	0.00124024	0	0.00220668	0.00997649	0	0.00261553	0.00123535
k__Bacteria; p__Bacteroidetes; c__Bacteroidia; o__Bacteroidales; f__Prevotellaceae; g__Prevotella; s__	709	0.010871	0.695033	0.00347187	0.00214456	0.00328374	0.00773231	0.00387177	0	0	0.0025281	0.000572785	0.00220966	0.000294968	0	0.00722222	0.00557493	0.0034965	0.00591745	0.00637735	0.0105404	0	0.0278792	0	0	0	0	0	0	0	0	0	0	0
k__Bacteria; p__Bacteroidetes; c__Bacteroidia; o__Bacteroidales; f__Prevotellaceae; g__Prevotella; s__	710	0.000551991	7.80449	0.0128909	5.76633e-05	0.0110566	0.000207908	0.0309741	0.00875427	0.00027018	0.0187802	0.0186155	0.00994349	0.0106188	0.0192166	0.00317778	0.0179637	0.0011655	0.00591745	0.0350754	0	0	0	0	0	0	0.000749623	0	0	0	0	0	0	0
k__Bacteria; p__Bacteroidetes; c__Bacteroidia; o__Bacteroidales; f__Prevotellaceae; g__Prevotella; s__	711	0.00647832	-2.61688	0.00235957	0.0144741	0.0024535	0.0193791	0	0	0.00729487	0.00144463	0.00229114	0.00138104	0.00176981	0.00556269	0.00491111	0.00371662	0.004662	0	0	0	0.00524198	0.072486	0.00523979	0.00356519	0.00718001	0.0227386	0.0040308	0.00452667	0.0110334	0.0142906	0.00326073	0.0308632	0.00370604
k__Bacteria; p__Bacteroidetes; c__Bacteroidia; o__Bacteroidales; f__Prevotellaceae; g__Prevotella; s__	712	0.520786	-3.54657	2.04566e-05	0.000239033	7.65416e-05	0.000477422	0	0	0	0	0.000286393	0	0	0	0	0	0	0	0	0	0	0	0	0	0.00123793	0.00124937	0.000620122	0	0	0	0	0	0
k__Bacteria; p__Bacteroidetes; c__Bacteroidia; o__Bacteroidales; f__Prevotellaceae; g__Prevotella; s__	713	0.779203	-3.34736	0.00125061	0.0127285	0.00467935	0.042654	0	0.0175085	0	0	0	0	0	0	0	0	0	0	0	0	0	0.0111517	0	0	0	0	0	0.154318	0	0	0	0	0
k__Bacteria; p__Bacteroidetes; c__Bacteroidia; o__Bacteroidales; f__Prevotellaceae; g__Prevotella; s__	714	0.0939245	#DIV/0!	0.00140244	0	0.00360064	0	0	0	0.00027018	0	0	0	0.0135685	0.0030342	0.00115556	0.000619437	0	0.000986242	0	0	0	0	0	0	0	0	0	0	0	0	0	0	0
k__Bacteria; p__Bacteroidetes; c__Bacteroidia; o__Bacteroidales; f__Prevotellaceae; g__Prevotella; s__	715	0.000514711	#DIV/0!	0.00538611	0	0.00532543	0	0.00387177	0.00875427	0.000810541	0.00216694	0.00486867	0.0104959	0.000294968	0	0.00346667	0.000619437	0.0104895	0.00591745	0.019132	0.00451732	0	0	0	0	0	0	0	0	0	0	0	0	0
k__Bacteria; p__Bacteroidetes; c__Bacteroidia; o__Bacteroidales; f__Prevotellaceae; g__Prevotella; s__	716	0.00235092	-5.26612	0.000297011	0.0114297	0.00103171	0.0169713	0.00387177	0	0	0	0.000286393	0	0	0	0	0	0	0	0	0	0.00917347	0	0.00130995	0.0546662	0.00123793	0.00624686	0.0198439	0.00329213	0	0.00485343	0.00163036	0.00680037	0.0395311
k__Bacteria; p__Bacteroidetes; c__Bacteroidia; o__Bacteroidales; f__Prevotellaceae; g__Prevotella; s__	717	0.000551991	-4.44743	0.00125943	0.0274778	0.00113146	0.0282895	0.00387177	0	0.00243162	0.00180578	0.00171836	0.00193346	0.00147484	0.000505699	0.000866666	0.00185831	0.0011655	0	0	0	0.0864927	0.0250913	0.0183392	0.0285215	0.0195593	0.00274862	0.00310061	0.0185182	0.00882671	0.0857439	0.017934	0.00156932	0.0407664
k__Bacteria; p__Bacteroidetes; c__Bacteroidia; o__Bacteroidales; f__Prevotellaceae; g__Prevotella; s__	718	0.135107	#NUM!	0	0.00363511	0	0.00828938	0	0	0	0	0	0	0	0	0	0	0	0	0	0	0	0	0	0	0.0289676	0.0112443	0.00124024	0.000411516	0	0.0053927	0	0	0
k__Bacteria; p__Bacteroidetes; c__Bacteroidia; o__Bacteroidales; f__Prevotellaceae; g__Prevotella; s__	719	0.385692	#NUM!	0	0.00123873	0	0.00257716	0	0	0	0	0	0	0	0	0	0	0	0	0	0	0	0	0	0	0.00718001	0.00649674	0	0	0	0.00242671	0	0	0
k__Bacteria; p__Bacteroidetes; c__Bacteroidia; o__Bacteroidales; f__Prevotellaceae; g__Prevotella; s__	720	0.378476	-5.62978	3.85972e-05	0.00191113	0.000144418	0.00592878	0	0	0.000540361	0	0	0	0	0	0	0	0	0	0	0	0	0	0	0	0.000247587	0.0214892	0	0.000411516	0	0.00269635	0	0	0
k__Bacteria; p__Bacteroidetes; c__Bacteroidia; o__Bacteroidales; f__Prevotellaceae; g__Prevotella; s__	721	1	#DIV/0!	0	0	0	0	0	0	0	0	0	0	0	0	0	0	0	0	0	0	0	0	0	0	0	0	0	0	0	0	0	0	0
k__Bacteria; p__Bacteroidetes; c__Bacteroidia; o__Bacteroidales; f__Prevotellaceae; g__Prevotella; s__	722	0.00139711	-8.71486	5.91874e-05	0.0248692	0.000221459	0.0256548	0	0	0	0	0	0.000828624	0	0	0	0	0	0	0	0	0.0209679	0	0	0.00950717	0.0807132	0.0252373	0.035657	0.000823032	0.0110334	0.0625553	0.00326073	0.0476026	0.0259423
k__Bacteria; p__Bacteroidetes; c__Bacteroidia; o__Bacteroidales; f__Prevotellaceae; g__Prevotella; s__	723	0.661359	-7.64698	0.000128788	0.0258135	0.000334835	0.0725575	0	0	0.00108072	0.000722314	0	0	0	0	0	0	0	0	0	0	0	0.256489	0.00130995	0	0	0	0	0.0777765	0	0	0	0	0
k__Bacteria; p__Bacteroidetes; c__Bacteroidia; o__Bacteroidales; f__Prevotellaceae; g__Prevotella; s__	724	0.575106	2.91924	0.000145397	1.92211e-05	0.000314918	6.93027e-05	0	0	0	0	0.000859178	0	0	0	0.000866666	0.000309718	0	0	0	0	0	0	0	0	0	0.000249874	0	0	0	0	0	0	0
k__Bacteria; p__Bacteroidetes; c__Bacteroidia; o__Bacteroidales; f__Prevotellaceae; g__Prevotella; s__	725	0.34072	-1.31486	0.0240768	0.0598979	0.0261903	0.0926292	0.050333	0.0350171	0.00567379	0.0350322	0.0140332	0.0309353	0.00117987	0.0930487	0.0026	0	0.0034965	0.0295873	0	0.0361386	0.0904242	0.334551	0.0916962	0.0356519	0.0123793	0.000249874	0.0421683	0.132508	0.00662003	0.00808904	0.00489109	0.0120314	0.00741207
k__Bacteria; p__Bacteroidetes; c__Bacteroidia; o__Bacteroidales; f__Prevotellaceae; g__Prevotella; s__	726	0.047746	-1.42918	0.0148936	0.0401074	0.00997361	0.0335329	0.0425894	0.0175085	0.0143196	0.0144463	0.0171836	0.0259636	0.0126836	0.0030342	0.0104	0.0151762	0.0151515	0.00295873	0.00956602	0.00752887	0.0537303	0.0696981	0.0222691	0.116463	0.00916071	0.0322338	0.0108521	0.0851838	0.00882671	0.0520395	0.0211947	0.0261553	0.0135888
k__Bacteria; p__Bacteroidetes; c__Bacteroidia; o__Bacteroidales; f__Prevotellaceae; g__Prevotella; s__	727	0.814586	-1.49517	0.000382248	0.00107755	0.000723161	0.00365843	0	0	0.00162108	0	0.00143196	0.000276208	0	0	0.00202222	0	0	0	0	0	0	0	0	0	0.000495173	0.0132433	0	0	0	0.000269635	0	0	0
k__Bacteria; p__Bacteroidetes; c__Bacteroidia; o__Bacteroidales; f__Prevotellaceae; g__Prevotella; s__	728	0.108521	-7.78635	2.10691e-05	0.00465128	7.88335e-05	0.0109245	0	0	0	0	0	0	0.000294968	0	0	0	0	0	0	0	0.0013105	0	0.0353686	0	0.000247587	0.000499749	0.0213942	0.00164606	0	0	0	0	0
k__Bacteria; p__Bacteroidetes; c__Bacteroidia; o__Bacteroidales; f__Prevotellaceae; g__Prevotella; s__	729	0.000898693	-6.58482	0.00142309	0.136603	0.00409351	0.149377	0.00387177	0	0.00027018	0	0	0.0151914	0.000589936	0	0	0	0	0	0	0	0.0642143	0	0.0576376	0.0142608	0.354049	0.306846	0.115343	0.00329213	0.0639936	0.460806	0.0228251	0.201396	0.111181
k__Bacteria; p__Bacteroidetes; c__Bacteroidia; o__Bacteroidales; f__Prevotellaceae; g__Prevotella; s__	730	0.000458554	6.24786	0.321525	0.00423079	0.19449	0.0102132	0.631098	0.551519	0.208849	0.158909	0.186442	0.575894	0.459265	0.293811	0.381911	0.388077	0.43007	0.0502983	0.0542075	0.131002	0	0.0334551	0	0	0	0	0	0.0189297	0	0	0	0.00261553	0
k__Bacteria; p__Bacteroidetes; c__Bacteroidia; o__Bacteroidales; f__Prevotellaceae; g__Prevotella; s__	731	1	8.97969	0.0479736	9.50266e-05	0.179501	0.000342623	0	0	0	0	0	0	0	0	0	0	0	0.671631	0	0	0	0	0	0	0	0	0	0	0	0	0	0	0.00123535
k__Bacteria; p__Bacteroidetes; c__Bacteroidia; o__Bacteroidales; f__Prevotellaceae; g__Prevotella; s__	732	0.00060338	-7.13961	5.91874e-05	0.00834574	0.000221459	0.00823765	0	0	0	0	0	0.000828624	0	0	0	0	0	0	0	0	0.00786297	0.00278792	0.00392984	0	0.0168359	0.0129935	0.00806159	0.000411516	0.00662003	0.0301991	0.00163036	0.0109852	0.00617673
k__Bacteria; p__Bacteroidetes; c__Bacteroidia; o__Bacteroidales; f__Prevotellaceae; g__Prevotella; s__	733	0.977175	-3.02195	0.00159966	0.0129935	0.00398458	0.040155	0	0	0.000540361	0.00722314	0.0137468	0	0.000884904	0	0	0	0	0	0	0	0	0.0167275	0	0	0	0	0.00651128	0.145677	0	0	0	0	0
k__Bacteria; p__Bacteroidetes; c__Bacteroidia; o__Bacteroidales; f__Prevotellaceae; g__Prevotella; s__	734	0.385692	#NUM!	0	0.00332068	0	0.00681913	0	0	0	0	0	0	0	0	0	0	0	0	0	0	0	0	0	0	0.02154	0.00949523	0	0	0	0.0121336	0	0	0
k__Bacteria; p__Bacteroidetes; c__Bacteroidia; o__Bacteroidales; f__Prevotellaceae; g__Prevotella; s__	735	0.977175	-1.56589	1.92986e-05	5.71354e-05	7.22088e-05	0.000206005	0	0	0.00027018	0	0	0	0	0	0	0	0	0	0	0	0	0	0	0	0.00074276	0	0	0	0	0	0	0	0
k__Bacteria; p__Bacteroidetes; c__Bacteroidia; o__Bacteroidales; f__Prevotellaceae; g__Prevotella; s__	736	0.0492719	#DIV/0!	0.0023381	0	0.00552517	0	0	0	0.00162108	0.00180578	0.0037231	0.000552416	0	0.0010114	0	0.0210608	0	0.00295873	0	0	0	0	0	0	0	0	0	0	0	0	0	0	0
k__Bacteria; p__Bacteroidetes; c__Bacteroidia; o__Bacteroidales; f__Prevotellaceae; g__Prevotella; s__	737	0.0197237	-3.12536	0.0316031	0.275776	0.0178791	0.45434	0.0232306	0.0262628	0.0432289	0.0455058	0.0524099	0.0400502	0.0224176	0.067258	0.0205111	0.0201317	0.0314685	0.000986242	0.0414528	0.00752887	0.435085	0.114305	1.70948	0.308983	0.1488	0.0839578	0.0223244	0.0839492	0.00220668	0.00458379	0.200535	0.405407	0.0654733
k__Bacteria; p__Bacteroidetes; c__Bacteroidia; o__Bacteroidales; f__Prevotellaceae; g__Prevotella; s__	738	0.00139711	3.54051	0.0099815	0.000857822	0.0117052	0.00309292	0.0387177	0	0.00189126	0.000722314	0.0103101	0.0110483	0.00206477	0.0030342	0.0150222	0.00154859	0.0011655	0.0226836	0.0255094	0.0060231	0	0.0111517	0	0	0	0	0	0	0	0	0	0	0
k__Bacteria; p__Bacteroidetes; c__Bacteroidia; o__Bacteroidales; f__Prevotellaceae; g__Prevotella; s__	739	0.000666541	-9.1337	0.000177562	0.09974	0.000664377	0.14768	0	0	0	0	0	0.00248587	0	0	0	0	0	0	0	0	0.0262099	0	0.0537078	0.0142608	0.0789801	0.0857069	0.0734845	0.000823032	0.00220668	0.396902	0.0733664	0.45144	0.0395311
k__Bacteria; p__Bacteroidetes; c__Bacteroidia; o__Bacteroidales; f__Prevotellaceae; g__Prevotella; s__	740	0.047746	3.44385	0.0400808	0.00368329	0.0655259	0.0114995	0.0154871	0	0.223439	0.0343099	0.00429589	0.0339736	0.0398207	0.0394445	0.000577778	0	0	0.0207111	0	0.149072	0.00262099	0.0418188	0.00261989	0	0	0	0	0.000823032	0	0	0	0	0
k__Bacteria; p__Bacteroidetes; c__Bacteroidia; o__Bacteroidales; f__Prevotellaceae; g__Prevotella; s__	741	0.000514711	#NUM!	0	0.0232477	0	0.0205629	0	0	0	0	0	0	0	0	0	0	0	0	0	0	0.0117945	0.00278792	0.0668073	0.0285215	0.0282249	0.0284857	0.0114723	0	0.0176534	0.00889795	0.0570627	0.0355712	0.00494138
k__Bacteria; p__Bacteroidetes; c__Bacteroidia; o__Bacteroidales; f__Prevotellaceae; g__Prevotella; s__	742	0.00403061	-5.42382	0.00039493	0.0169533	0.00109381	0.0145251	0.00387177	0	0	0	0	0.00165725	0	0	0	0	0	0	0	0	0.010484	0	0.0406083	0.0190143	0.0388711	0.0289854	0.00620122	0	0	0.0253457	0.0293466	0.0141239	0.00741207
k__Bacteria; p__Bacteroidetes; c__Bacteroidia; o__Bacteroidales; f__Prevotellaceae; g__Prevotella; s__	743	0.00235092	-7.92995	0.000458926	0.111917	0.00104673	0.140631	0.00387177	0	0.00027018	0	0	0.000828624	0	0	0.000288889	0	0.0011655	0	0	0	0.0013105	0	0.110035	0.0285215	0.059916	0.181659	0.0244948	0	0.0331002	0.352952	0.167927	0.439409	0.0555906
k__Bacteria; p__Bacteroidetes; c__Bacteroidia; o__Bacteroidales; f__Prevotellaceae; g__Prevotella; s__	744	0.422404	#DIV/0!	0.00025881	0	0.000540726	0	0	0	0.000810541	0	0	0.00165725	0	0	0.00115556	0	0	0	0	0	0	0	0	0	0	0	0	0	0	0	0	0	0
k__Bacteria; p__Bacteroidetes; c__Bacteroidia; o__Bacteroidales; f__Prevotellaceae; g__Prevotella; s__	745	0.385692	#NUM!	0	0.000385526	0	0.000858062	0	0	0	0	0	0	0	0	0	0	0	0	0	0	0	0	0	0	0.00272345	0.00174912	0	0	0	0.00053927	0	0	0
k__Bacteria; p__Bacteroidetes; c__Bacteroidia; o__Bacteroidales; f__Prevotellaceae; g__Prevotella; s__	746	0.2764	#DIV/0!	0.000165586	0	0.000321604	0	0	0	0.00108072	0.000361157	0.000286393	0	0.000589936	0	0	0	0	0	0	0	0	0	0	0	0	0	0	0	0	0	0	0	0
k__Bacteria; p__Bacteroidetes; c__Bacteroidia; o__Bacteroidales; f__Prevotellaceae; g__Prevotella; s__	747	0.00737679	7.02156	0.0123466	9.50266e-05	0.0192705	0.000342623	0.0193588	0.0700341	0.00108072	0.0130016	0.00229114	0	0	0.0020228	0.00866666	0.0275649	0	0.0256423	0.00318867	0	0	0	0	0	0	0	0	0	0	0	0	0	0.00123535
k__Bacteria; p__Bacteroidetes; c__Bacteroidia; o__Bacteroidales; f__Prevotellaceae; g__Prevotella; s__	748	0.239594	#NUM!	0	0.000699044	0	0.00158452	0	0	0	0	0	0	0	0	0	0	0	0	0	0	0	0	0	0	0.00519932	0.00299849	0.000620122	0	0	0.000269635	0	0	0
k__Bacteria; p__Bacteroidetes; c__Bacteroidia; o__Bacteroidales; f__Prevotellaceae; g__Prevotella; s__	749	0.76241	-1.02029	5.90538e-05	0.00011978	0.00015816	0.0002843	0	0	0.000540361	0	0.000286393	0	0	0	0	0	0	0	0	0	0	0	0	0	0.000247587	0.000999498	0.000310061	0	0	0	0	0	0
k__Bacteria; p__Bacteroidetes; c__Bacteroidia; o__Bacteroidales; f__Prevotellaceae; g__Prevotella; s__	750	0.846161	0.0549084	3.99335e-05	3.84422e-05	0.000101576	0.000138605	0	0	0.00027018	0	0	0	0	0	0.000288889	0	0	0	0	0	0	0	0	0	0	0.000499749	0	0	0	0	0	0	0
k__Bacteria; p__Bacteroidetes; c__Bacteroidia; o__Bacteroidales; f__Prevotellaceae; g__Prevotella; s__	751	0.977175	-1.92257	0.000158398	0.000600484	0.000413688	0.00207369	0	0	0.0013509	0	0	0	0	0	0.000866666	0	0	0	0	0	0	0	0	0	0	0.00749623	0.000310061	0	0	0	0	0	0
k__Bacteria; p__Bacteroidetes; c__Bacteroidia; o__Bacteroidales; f__Prevotellaceae; g__Prevotella; s__	752	0.31925	1.105	0.00138387	0.000643367	0.00298609	0.00231969	0	0	0.000540361	0	0.00973735	0.000276208	0.00648929	0	0	0	0.002331	0	0	0	0	0.00836377	0	0	0	0	0	0	0	0	0	0	0
k__Bacteria; p__Bacteroidetes; c__Bacteroidia; o__Bacteroidales; f__Prevotellaceae; g__Prevotella; s__	753	0.422404	#DIV/0!	0.000223817	0	0.000541233	0	0	0	0	0	0	0	0	0	0.000288889	0.00185831	0	0.000986242	0	0	0	0	0	0	0	0	0	0	0	0	0	0	0
k__Bacteria; p__Bacteroidetes; c__Bacteroidia; o__Bacteroidales; f__Prevotellaceae; g__Prevotella; s__	754	0.353247	-6.20031	8.32501e-05	0.00612158	0.000311493	0.0142497	0	0	0	0	0	0	0	0	0	0	0.0011655	0	0	0	0	0	0	0	0.0470415	0.0259869	0.000620122	0	0	0.00593197	0	0	0
k__Bacteria; p__Bacteroidetes; c__Bacteroidia; o__Bacteroidales; f__Prevotellaceae; g__Prevotella; s__	755	1	#DIV/0!	0	0	0	0	0	0	0	0	0	0	0	0	0	0	0	0	0	0	0	0	0	0	0	0	0	0	0	0	0	0	0
k__Bacteria; p__Bacteroidetes; c__Bacteroidia; o__Bacteroidales; f__Prevotellaceae; g__Prevotella; s__	756	0.385692	#NUM!	0	0.00086395	0	0.00200652	0	0	0	0	0	0	0	0	0	0	0	0	0	0	0	0	0	0	0.00693243	0.00274862	0.00155031	0	0	0	0	0	0
k__Bacteria; p__Bacteroidetes; c__Bacteroidia; o__Bacteroidales; f__Prevotellaceae; g__Prevotella; s__	757	0.385692	#NUM!	0	0.000243135	0	0.000583262	0	0	0	0	0	0	0	0	0	0	0	0	0	0	0	0	0	0	0.00198069	0.000249874	0.000930184	0	0	0	0	0	0
k__Bacteria; p__Bacteroidetes; c__Bacteroidia; o__Bacteroidales; f__Prevotellaceae; g__Prevotella; s__	758	1	#DIV/0!	0	0	0	0	0	0	0	0	0	0	0	0	0	0	0	0	0	0	0	0	0	0	0	0	0	0	0	0	0	0	0
k__Bacteria; p__Bacteroidetes; c__Bacteroidia; o__Bacteroidales; f__Prevotellaceae; g__Prevotella; s__	759	0.00840891	5.64983	0.0107673	0.000214456	0.0147645	0.000773231	0.0193588	0.00875427	0.00027018	0.00361157	0.0077326	0.0472316	0.0324465	0.00556269	0.0248444	0.000929155	0	0	0	0	0	0.00278792	0	0	0	0	0	0	0	0	0	0	0
k__Bacteria; p__Bacteroidetes; c__Bacteroidia; o__Bacteroidales; f__Prevotellaceae; g__Prevotella; s__	760	0.239594	#NUM!	0	0.000712227	0	0.00198693	0	0	0	0	0	0	0	0	0	0	0	0	0	0	0	0	0	0	0.00718001	0.00149925	0.000310061	0	0	0.000269635	0	0	0
k__Bacteria; p__Bacteroidetes; c__Bacteroidia; o__Bacteroidales; f__Prevotellaceae; g__Prevotella; s__	761	0.575106	#NUM!	0	0.000363265	0	0.000898966	0	0	0	0	0	0	0	0	0	0	0	0	0	0	0	0	0	0	0.00272345	0.001999	0	0	0	0	0	0	0
k__Bacteria; p__Bacteroidetes; c__Bacteroidia; o__Bacteroidales; f__Prevotellaceae; g__Prevotella; s__	762	0.520786	-3.0854	0.000107555	0.000912913	0.000402435	0.00190558	0	0	0	0	0	0	0	0	0	0	0	0	0	0.00150577	0	0	0	0	0.0037138	0.00599699	0	0	0	0.00215708	0	0	0
k__Bacteria; p__Bacteroidetes; c__Bacteroidia; o__Bacteroidales; f__Prevotellaceae; g__Prevotella; s__	763	0.385692	#NUM!	0	0.000796147	0	0.00225353	0	0	0	0	0	0	0	0	0	0	0	0	0	0	0	0	0	0	0.00817036	0.00124937	0.000930184	0	0	0	0	0	0
k__Bacteria; p__Bacteroidetes; c__Bacteroidia; o__Bacteroidales; f__Prevotellaceae; g__Prevotella; s__	764	0.977175	0.939637	0.00153759	0.000801642	0.00554856	0.00234222	0	0	0.0208039	0.000722314	0	0	0	0	0	0	0	0	0	0	0	0.00836377	0	0	0	0	0	0.00205758	0	0	0	0	0
k__Bacteria; p__Bacteroidetes; c__Bacteroidia; o__Bacteroidales; f__Prevotellaceae; g__Prevotella; s__	765	0.0939245	#DIV/0!	0.0019196	0	0.00460563	0	0	0.0175085	0	0	0.00229114	0.00110483	0.00176981	0.0010114	0	0	0	0	0.00318867	0	0	0	0	0	0	0	0	0	0	0	0	0	0
k__Bacteria; p__Bacteroidetes; c__Bacteroidia; o__Bacteroidales; f__Prevotellaceae; g__Prevotella; s__	766	0.632473	2.48209	0.000214779	3.84422e-05	0.000646437	0.000138605	0	0	0.00243162	0	0.000286393	0	0	0	0.000288889	0	0	0	0	0	0	0	0	0	0	0.000499749	0	0	0	0	0	0	0
k__Bacteria; p__Bacteroidetes; c__Bacteroidia; o__Bacteroidales; f__Prevotellaceae; g__Prevotella; s__	767	0.239594	#NUM!	0	0.000344862	0	0.000792909	0	0	0	0	0	0	0	0	0	0	0	0	0	0	0	0	0	0	0.00272345	0.000249874	0.00124024	0	0	0.000269635	0	0	0
k__Bacteria; p__Bacteroidetes; c__Bacteroidia; o__Bacteroidales; f__Prevotellaceae; g__Prevotella; s__	768	0.786803	#NUM!	0	1.90451e-05	0	6.86682e-05	0	0	0	0	0	0	0	0	0	0	0	0	0	0	0	0	0	0	0.000247587	0	0	0	0	0	0	0	0
k__Bacteria; p__Bacteroidetes; c__Bacteroidia; o__Bacteroidales; f__Prevotellaceae; g__Prevotella; s__	769	0.16748	#DIV/0!	0.000324668	0	0.000582927	0	0	0	0.000540361	0	0.000859178	0.000828624	0.000294968	0	0.00202222	0	0	0	0	0	0	0	0	0	0	0	0	0	0	0	0	0	0
k__Bacteria; p__Bacteroidetes; c__Bacteroidia; o__Bacteroidales; f__Prevotellaceae; g__Prevotella; s__	770	0.600367	3.03337	0.000259166	3.16551e-05	0.000602799	0.000114134	0	0	0.00162108	0	0.00171836	0	0	0	0.000288889	0	0	0	0	0	0	0	0	0	0	0	0	0.000411516	0	0	0	0	0
k__Bacteria; p__Bacteroidetes; c__Bacteroidia; o__Bacteroidales; f__Prevotellaceae; g__Prevotella; s__	771	0.16748	#DIV/0!	0.00271563	0	0.00555177	0	0	0	0.00945632	0.0195025	0.00486867	0	0.00117987	0	0	0	0	0	0	0.00301155	0	0	0	0	0	0	0	0	0	0	0	0	0
k__Bacteria; p__Bacteroidetes; c__Bacteroidia; o__Bacteroidales; f__Prevotellaceae; g__Prevotella; s__	772	0.632473	0.731849	0.00035616	0.000214456	0.000888256	0.000773231	0	0	0.00324217	0	0.000859178	0	0.000884904	0	0	0	0	0	0	0	0	0.00278792	0	0	0	0	0	0	0	0	0	0	0
k__Bacteria; p__Bacteroidetes; c__Bacteroidia; o__Bacteroidales; f__Prevotellaceae; g__Prevotella; s__	773	0.798659	4.51319	0.00432788	0.000189526	0.0158636	0.000335312	0	0	0.0594397	0	0.000572785	0	0	0	0.000577778	0	0	0	0	0	0	0	0	0	0.00074276	0.000999498	0.000310061	0.000411516	0	0	0	0	0
k__Bacteria; p__Bacteroidetes; c__Bacteroidia; o__Bacteroidales; f__Prevotellaceae; g__Prevotella; s__	774	0.0939245	#DIV/0!	0.00674935	0	0.0152113	0	0	0	0.0170214	0.0148074	0.0558466	0	0.00176981	0.00353989	0	0	0	0	0	0.00150577	0	0	0	0	0	0	0	0	0	0	0	0	0
k__Bacteria; p__Bacteroidetes; c__Bacteroidia; o__Bacteroidales; f__Prevotellaceae; g__Prevotella; s__	775	0.814586	0.801497	0.000100502	5.76633e-05	0.000263365	0.000207908	0	0	0.000540361	0	0	0	0	0	0.000866666	0	0	0	0	0	0	0	0	0	0	0.000749623	0	0	0	0	0	0	0
k__Bacteria; p__Bacteroidetes; c__Bacteroidia; o__Bacteroidales; f__Prevotellaceae; g__Prevotella; s__	776	0.779203	-1.47816	2.06349e-05	5.74873e-05	7.72088e-05	0.000149467	0	0	0	0	0	0	0	0	0.000288889	0	0	0	0	0	0	0	0	0	0.000247587	0.000499749	0	0	0	0	0	0	0
k__Bacteria; p__Bacteroidetes; c__Bacteroidia; o__Bacteroidales; f__Prevotellaceae; g__Prevotella; s__	777	0.786803	5.02575	0.00103121	3.16551e-05	0.00361143	0.000114134	0	0	0	0	0	0	0.000884904	0	0	0	0	0	0	0.013552	0	0	0	0	0	0	0	0.000411516	0	0	0	0	0
k__Bacteria; p__Bacteroidetes; c__Bacteroidia; o__Bacteroidales; f__Prevotellaceae; g__Prevotella; s__	778	0.135107	-5.58897	6.00932e-05	0.0028925	0.00016126	0.00445713	0	0	0	0	0	0.000552416	0	0	0.000288889	0	0	0	0	0	0.00393149	0	0	0	0.00346621	0.00824586	0.00372073	0	0	0.0150995	0	0.00313863	0
k__Bacteria; p__Bacteroidetes; c__Bacteroidia; o__Bacteroidales; f__Prevotellaceae; g__Prevotella; s__	779	0.239594	#NUM!	0	0.00625776	0	0.0187929	0	0	0	0	0	0	0	0	0	0	0	0	0	0	0	0	0	0	0.0680863	0.0102449	0.00248049	0	0	0.00053927	0	0	0
k__Bacteria; p__Bacteroidetes; c__Bacteroidia; o__Bacteroidales; f__Prevotellaceae; g__Prevotella; s__	780	1	#DIV/0!	0	0	0	0	0	0	0	0	0	0	0	0	0	0	0	0	0	0	0	0	0	0	0	0	0	0	0	0	0	0	0
k__Bacteria; p__Bacteroidetes; c__Bacteroidia; o__Bacteroidales; f__Prevotellaceae; g__Prevotella; s__	781	0.190108	-3.95249	1.92986e-05	0.000298775	7.22088e-05	0.000471087	0	0	0.00027018	0	0	0	0	0	0	0	0	0	0	0	0	0	0	0	0.00074276	0.00149925	0.000310061	0	0	0.000808904	0	0.000523106	0
k__Bacteria; p__Bacteroidetes; c__Bacteroidia; o__Bacteroidales; f__Prevotellaceae; g__Prevotella; s__	782	0.422404	-0.199591	0.000625305	0.000718083	0.00233968	0.00156476	0	0.00875427	0	0	0	0	0	0	0	0	0	0	0	0	0	0	0	0	0.00321863	0.00499749	0.000310061	0	0	0.000808904	0	0	0
k__Bacteria; p__Bacteroidetes; c__Bacteroidia; o__Bacteroidales; f__Prevotellaceae; g__Prevotella; s__	783	0.977175	-0.658285	0.000107555	0.000169744	0.000402435	0.000612022	0	0	0	0	0	0	0	0	0	0	0	0	0	0.00150577	0	0	0	0	0	0	0	0	0.00220668	0	0	0	0
k__Bacteria; p__Bacteroidetes; c__Bacteroidia; o__Bacteroidales; f__Prevotellaceae; g__Prevotella; s__	784	0.2764	#DIV/0!	8.17854e-05	0	0.000134458	0	0	0	0.00027018	0	0	0.000276208	0	0	0.000288889	0.000309718	0	0	0	0	0	0	0	0	0	0	0	0	0	0	0	0	0
k__Bacteria; p__Bacteroidetes; c__Bacteroidia; o__Bacteroidales; f__Prevotellaceae; g__Prevotella; s__	785	0.16748	#DIV/0!	0.00956062	0	0.0330467	0	0.00387177	0	0	0.124238	0.00515507	0	0.000294968	0	0.000288889	0	0	0	0	0	0	0	0	0	0	0	0	0	0	0	0	0	0
k__Bacteria; p__Bacteroidetes; c__Bacteroidia; o__Bacteroidales; f__Prevotellaceae; g__Prevotella; s__	786	0.0289887	1.26575	0.0061729	0.0025672	0.00545842	0.00666142	0	0	0.00594397	0	0.000572785	0.00966728	0.0132736	0.000505699	0.0121333	0.0130082	0.0034965	0.00788994	0.00637735	0.013552	0	0.0111517	0	0	0	0	0	0.0222219	0	0	0	0	0
k__Bacteria; p__Bacteroidetes; c__Bacteroidia; o__Bacteroidales; f__Prevotellaceae; g__Prevotella; s__	787	0.0240997	#DIV/0!	0.0128941	0	0.025418	0	0.0619483	0	0	0.0751206	0.00257753	0	0.00176981	0.0010114	0.00115556	0.00185831	0	0	0.0350754	0	0	0	0	0	0	0	0	0	0	0	0	0	0
k__Bacteria; p__Bacteroidetes; c__Bacteroidia; o__Bacteroidales; f__Prevotellaceae; g__Prevotella; s__	788	0.591868	-4.06836	0.000110379	0.00185176	0.000271542	0.00413356	0	0	0.00027018	0	0	0	0	0	0.000288889	0	0	0.000986242	0	0	0	0	0	0	0.0101511	0.011994	0.000310061	0	0	0.00161781	0	0	0
k__Bacteria; p__Bacteroidetes; c__Bacteroidia; o__Bacteroidales; f__Prevotellaceae; g__Prevotella; s__	789	0.966777	0.754773	0.000811024	0.000480645	0.001478	0.000605083	0	0	0.00513343	0.00288925	0.000286393	0.000276208	0.00117987	0.0010114	0.000577778	0	0	0	0	0	0	0	0.00130995	0	0.000495173	0.000749623	0.00124024	0.000823032	0	0	0.00163036	0	0
k__Bacteria; p__Bacteroidetes; c__Bacteroidia; o__Bacteroidales; f__Prevotellaceae; g__Prevotella; s__	790	0.0240997	#DIV/0!	0.00232213	0	0.00397393	0	0	0	0	0.000361157	0.0037231	0.00110483	0.00648929	0.0015171	0.0144444	0.00185831	0	0	0	0.00301155	0	0	0	0	0	0	0	0	0	0	0	0	0
k__Bacteria; p__Bacteroidetes; c__Bacteroidia; o__Bacteroidales; f__Prevotellaceae; g__Prevotella; s__	791	0.135107	#NUM!	0	0.000614522	0	0.00126108	0	0	0	0	0	0	0	0	0	0	0	0	0	0	0	0	0	0	0.00445656	0.00149925	0.00124024	0	0	0.000269635	0	0.000523106	0
k__Bacteria; p__Bacteroidetes; c__Bacteroidia; o__Bacteroidales; f__Prevotellaceae; g__Prevotella; s__	792	0.385692	#NUM!	0	0.00140597	0	0.00365303	0	0	0	0	0	0	0	0	0	0	0	0	0	0	0	0	0	0	0.0131221	0.00299849	0	0	0	0.00215708	0	0	0
k__Bacteria; p__Bacteroidetes; c__Bacteroidia; o__Bacteroidales; f__Prevotellaceae; g__Prevotella; s__	793	1	#DIV/0!	0	0	0	0	0	0	0	0	0	0	0	0	0	0	0	0	0	0	0	0	0	0	0	0	0	0	0	0	0	0	0
k__Bacteria; p__Bacteroidetes; c__Bacteroidia; o__Bacteroidales; f__Prevotellaceae; g__Prevotella; s__	794	0.600367	#DIV/0!	0.00158382	0	0.00584348	0	0	0	0.0218846	0	0	0	0	0	0.000288889	0	0	0	0	0	0	0	0	0	0	0	0	0	0	0	0	0	0
k__Bacteria; p__Bacteroidetes; c__Bacteroidia; o__Bacteroidales; f__Prevotellaceae; g__Prevotella; s__	795	0.0939245	#DIV/0!	0.00356833	0	0.00981102	0	0	0	0.00297198	0.000361157	0.0077326	0	0.000589936	0	0.00144444	0.0368565	0	0	0	0	0	0	0	0	0	0	0	0	0	0	0	0	0
k__Bacteria; p__Bacteroidetes; c__Bacteroidia; o__Bacteroidales; f__Prevotellaceae; g__Prevotella; s__	796	0.385692	#NUM!	0	0.000445131	0	0.00104233	0	0	0	0	0	0	0	0	0	0	0	0	0	0	0	0	0	0	0.00222828	0.00324837	0.000310061	0	0	0	0	0	0
k__Bacteria; p__Bacteroidetes; c__Bacteroidia; o__Bacteroidales; f__Prevotellaceae; g__Prevotella; s__	797	0.0939245	#DIV/0!	0.000406299	0	0.000647701	0	0	0	0.00027018	0.000722314	0	0	0.00206477	0.000505699	0	0.000619437	0	0	0	0.00150577	0	0	0	0	0	0	0	0	0	0	0	0	0
k__Bacteria; p__Bacteroidetes; c__Bacteroidia; o__Bacteroidales; f__Prevotellaceae; g__Prevotella; s__	798	0.385692	#NUM!	0	0.00141505	0	0.00292839	0	0	0	0	0	0	0	0	0	0	0	0	0	0	0	0	0	0	0.00891312	0.00624686	0	0	0	0.00323562	0	0	0
k__Bacteria; p__Bacteroidetes; c__Bacteroidia; o__Bacteroidales; f__Prevotellaceae; g__Prevotella; s__	799	0.385692	#NUM!	0	0.000636217	0	0.00139143	0	0	0	0	0	0	0	0	0	0	0	0	0	0	0	0	0	0	0.0037138	0.00374812	0	0	0	0.000808904	0	0	0
k__Bacteria; p__Bacteroidetes; c__Bacteroidia; o__Bacteroidales; f__Prevotellaceae; g__Prevotella; s__	800	0.575106	2.36455	9.89873e-05	1.92211e-05	0.000229594	6.93027e-05	0	0	0.000810541	0	0.000286393	0	0	0	0.000288889	0	0	0	0	0	0	0	0	0	0	0.000249874	0	0	0	0	0	0	0
k__Bacteria; p__Bacteroidetes; c__Bacteroidia; o__Bacteroidales; f__Prevotellaceae; g__Prevotella; s__	801	0.378476	-3.48865	5.78958e-05	0.000649883	0.000216626	0.00149419	0	0	0.000810541	0	0	0	0	0	0	0	0	0	0	0	0	0	0	0	0.00198069	0.00524736	0	0.000411516	0	0.000808904	0	0	0
k__Bacteria; p__Bacteroidetes; c__Bacteroidia; o__Bacteroidales; f__Prevotellaceae; g__Prevotella; s__	802	0.600367	#DIV/0!	0.000645761	0	0.00233504	0	0	0.00875427	0	0	0.000286393	0	0	0	0	0	0	0	0	0	0	0	0	0	0	0	0	0	0	0	0	0	0
k__Bacteria; p__Bacteroidetes; c__Bacteroidia; o__Bacteroidales; f__Prevotellaceae; g__Prevotella; s__	803	0.0939245	#DIV/0!	0.00231215	0	0.00761909	0	0	0	0.00027018	0	0	0.000276208	0	0.000505699	0.000288889	0	0.002331	0	0.0286981	0	0	0	0	0	0	0	0	0	0	0	0	0	0
k__Bacteria; p__Bacteroidetes; c__Bacteroidia; o__Bacteroidales; f__Prevotellaceae; g__Prevotella; s__	804	0.239594	#NUM!	0	0.00178097	0	0.00352404	0	0	0	0	0	0	0	0	0	0	0	0	0	0	0	0	0	0	0.0108938	0.00574711	0.000310061	0	0	0.0062016	0	0	0
k__Bacteria; p__Bacteroidetes; c__Bacteroidia; o__Bacteroidales; f__Prevotellaceae; g__Prevotella; s__	805	0.786803	-0.530706	0.00146844	0.00212137	0.00351738	0.0049658	0	0	0.0126985	0.000361157	0.00229114	0.000276208	0	0	0	0	0	0.00493121	0	0	0	0.0167275	0.00261989	0	0	0	0	0.00823032	0	0	0	0	0
k__Bacteria; p__Bacteroidetes; c__Bacteroidia; o__Bacteroidales; f__Prevotellaceae; g__Prevotella; s__	806	0.779203	-2.31348	1.92986e-05	9.59296e-05	7.22088e-05	0.00027998	0	0	0.00027018	0	0	0	0	0	0	0	0	0	0	0	0	0	0	0	0.000247587	0.000999498	0	0	0	0	0	0	0
k__Bacteria; p__Bacteroidetes; c__Bacteroidia; o__Bacteroidales; f__Prevotellaceae; g__Prevotella; s__	807	0.575106	#NUM!	0	0.000819996	0	0.0025401	0	0	0	0	0	0	0	0	0	0	0	0	0	0	0	0	0	0	0.00916071	0.00149925	0	0	0	0	0	0	0
k__Bacteria; p__Bacteroidetes; c__Bacteroidia; o__Bacteroidales; f__Prevotellaceae; g__Prevotella; s__	808	0.746609	-8.91171	2.04566e-05	0.00985203	7.65416e-05	0.0347424	0	0	0	0	0.000286393	0	0	0	0	0	0	0	0	0	0	0.125457	0.00261989	0	0	0	0	0	0	0	0	0	0
k__Bacteria; p__Bacteroidetes; c__Bacteroidia; o__Bacteroidales; f__Prevotellaceae; g__Prevotella; s__	809	0.259014	1.1171	0.00222965	0.00102791	0.00390059	0.0022696	0	0	0.0013509	0.00108347	0.00114557	0.00524795	0	0.00809119	0.013	0.000309718	0	0.000986242	0	0	0.00655248	0.00557585	0	0	0	0	0	0.00123455	0	0	0	0	0
k__Bacteria; p__Bacteroidetes; c__Bacteroidia; o__Bacteroidales; f__Prevotellaceae; g__Prevotella; s__	810	0.2764	#DIV/0!	0.000276835	0	0.000719968	0	0	0	0.0027018	0	0.000286393	0	0	0	0.000577778	0.000309718	0	0	0	0	0	0	0	0	0	0	0	0	0	0	0	0	0
k__Bacteria; p__Bacteroidetes; c__Bacteroidia; o__Bacteroidales; f__Prevotellaceae; g__Prevotella; s__	811	0.2764	#DIV/0!	0.000161044	0	0.000318245	0	0	0	0.00108072	0	0.000286393	0	0	0	0.000577778	0.000309718	0	0	0	0	0	0	0	0	0	0	0	0	0	0	0	0	0
k__Bacteria; p__Bacteroidetes; c__Bacteroidia; o__Bacteroidales; f__Prevotellaceae; g__Prevotella; s__	812	0.798659	#DIV/0!	0.000250882	0	0.000938714	0	0	0	0.00351235	0	0	0	0	0	0	0	0	0	0	0	0	0	0	0	0	0	0	0	0	0	0	0	0
k__Bacteria; p__Bacteroidetes; c__Bacteroidia; o__Bacteroidales; f__Prevotellaceae; g__Prevotella; s__	813	0.0308052	3.01096	0.00172872	0.000214456	0.0020064	0.000773231	0.00387177	0	0	0.00108347	0.000572785	0.00276208	0.00265471	0.0015171	0.00288889	0.00185831	0.00699301	0	0	0	0	0.00278792	0	0	0	0	0	0	0	0	0	0	0
k__Bacteria; p__Bacteroidetes; c__Bacteroidia; o__Bacteroidales; f__Prevotellaceae; g__Prevotella; s__	814	0.0939245	#DIV/0!	0.0086028	0	0.0220322	0	0.0774353	0	0.000810541	0	0	0.000552416	0	0	0.0364	0.000309718	0	0.00493121	0	0	0	0	0	0	0	0	0	0	0	0	0	0	0
k__Bacteria; p__Bacteroidetes; c__Bacteroidia; o__Bacteroidales; f__Prevotellaceae; g__Prevotella; s__	815	0.798659	#DIV/0!	4.12698e-05	0	0.000154418	0	0	0	0	0	0	0	0	0	0.000577778	0	0	0	0	0	0	0	0	0	0	0	0	0	0	0	0	0	0
k__Bacteria; p__Bacteroidetes; c__Bacteroidia; o__Bacteroidales; f__Prevotellaceae; g__Prevotella; s__	816	0.977175	-3.45819	0.000223571	0.00245716	0.00043301	0.00645985	0	0	0.000810541	0	0.00143196	0	0	0	0.000577778	0.000309718	0	0	0	0	0	0	0	0.00237679	0	0	0	0.0230449	0	0	0.00652146	0	0
k__Bacteria; p__Bacteroidetes; c__Bacteroidia; o__Bacteroidales; f__Prevotellaceae; g__Prevotella; s__	817	0.977175	-1.57916	1.92986e-05	5.76633e-05	7.22088e-05	0.000207908	0	0	0.00027018	0	0	0	0	0	0	0	0	0	0	0	0	0	0	0	0	0.000749623	0	0	0	0	0	0	0
k__Bacteria; p__Bacteroidetes; c__Bacteroidia; o__Bacteroidales; f__Prevotellaceae; g__Prevotella; s__	818	0.879697	-1.60568	0.000121288	0.000369127	0.000260292	0.000980787	0	0	0.000810541	0	0	0	0	0	0.000577778	0.000309718	0	0	0	0	0	0	0	0	0.000990347	0.00349824	0.000310061	0	0	0	0	0	0
k__Bacteria; p__Bacteroidetes; c__Bacteroidia; o__Bacteroidales; f__Prevotellaceae; g__Prevotella; s__copri	819	0.000514711	-4.45067	0.0143789	0.314421	0.0258822	0.282392	0.0929224	0.00875427	0.0467412	0.00180578	0.00143196	0.00469554	0	0.00505699	0.000577778	0	0.0034965	0.0177524	0	0.0180693	0.115324	0.0111517	0.564587	0.922196	0.0336718	0.146676	0.109452	0.411104	0.139021	0.196564	0.471175	0.250044	0.716501
k__Bacteria; p__Bacteroidetes; c__Bacteroidia; o__Bacteroidales; f__Prevotellaceae; g__Prevotella; s__copri	820	0.130986	-4.98987	0.000276555	0.00878784	0.00103477	0.0240388	0.00387177	0	0	0	0	0	0	0	0	0	0	0	0	0	0	0	0.0104796	0.0879413	0.00173311	0	0.00279055	0	0.00882671	0	0	0	0.00247069
k__Bacteria; p__Bacteroidetes; c__Bacteroidia; o__Bacteroidales; f__Prevotellaceae; g__Prevotella; s__copri	821	0.000864891	-5.56683	0.00192197	0.0911026	0.00615362	0.151761	0.0232306	0	0.00162108	0.000361157	0	0.00110483	0.000589936	0	0	0	0	0	0	0	0.0550408	0	0.575066	0.165187	0.0212925	0.041729	0.0319363	0.00617274	0.0286868	0.0932936	0.0260858	0.0669575	0.0728854
k__Bacteria; p__Bacteroidetes; c__Bacteroidia; o__Bacteroidales; f__Prevotellaceae; g__Prevotella; s__copri	822	0.000864891	-5.06318	0.000276555	0.00924592	0.00103477	0.0114172	0.00387177	0	0	0	0	0	0	0	0	0	0	0	0	0	0.00917347	0	0.0432282	0.0178259	0.00643725	0.00374812	0.00837165	0.000823032	0.00882671	0.00458379	0.00163036	0.0130776	0.00247069
k__Bacteria; p__Bacteroidetes; c__Bacteroidia; o__Bacteroidales; f__Prevotellaceae; g__Prevotella; s__copri	823	0.00647832	#NUM!	0	0.00266369	0	0.00366073	0	0	0	0	0	0	0	0	0	0	0	0	0	0	0	0	0.00392984	0.011884	0.000495173	0.000499749	0	0.000823032	0	0.00377489	0.00652146	0.000523106	0.00617673
k__Bacteria; p__Bacteroidetes; c__Bacteroidia; o__Bacteroidales; f__Prevotellaceae; g__Prevotella; s__copri	824	0.600367	0.525154	0.000250882	0.000174334	0.000938714	0.000482901	0	0	0.00351235	0	0	0	0	0	0	0	0	0	0	0	0	0	0	0	0.000247587	0.00174912	0	0	0	0.000269635	0	0	0
k__Bacteria; p__Bacteroidetes; c__Bacteroidia; o__Bacteroidales; f__Prevotellaceae; g__Prevotella; s__melaninogenica	825	0.661359	0.27928	0.000395399	0.00032581	0.00121551	0.000623604	0	0	0.00459307	0.000361157	0.000286393	0	0.000294968	0	0	0	0	0	0	0	0	0	0	0	0.000247587	0.000749623	0.000620122	0.000411516	0.00220668	0	0	0	0
k__Bacteria; p__Bacteroidetes; c__Bacteroidia; o__Bacteroidales; f__RF16; g__; s__	826	0.011125	4.22254	0.0334842	0.00179361	0.0598581	0.0043785	0.0619483	0	0.127255	0.0241975	0.202193	0.0143628	0.00383458	0.0030342	0.00404444	0.00433606	0	0.000986242	0	0.0225866	0.0117945	0	0	0	0	0	0	0.0115224	0	0	0	0	0
k__Bacteria; p__Bacteroidetes; c__Bacteroidia; o__Bacteroidales; f__RF16; g__; s__	827	0.39943	-1.19057	0.00880591	0.0200989	0.0144192	0.0201591	0.00387177	0	0.0172915	0.00794545	0.0555602	0.0102197	0.00855407	0.0111254	0.00144444	0.00278747	0.0034965	0.000986242	0	0	0.0157259	0.0501826	0.0261989	0.0320867	0.0373856	0.000249874	0.0477494	0.0440322	0.00441335	0	0.00326073	0	0
k__Bacteria; p__Bacteroidetes; c__Bacteroidia; o__Bacteroidales; f__RF16; g__; s__	828	0.365528	-0.178459	0.262514	0.297081	0.111544	0.359003	0.491714	0.455222	0.34448	0.197553	0.263768	0.16241	0.306177	0.232116	0.205111	0.327682	0.172494	0.160757	0.114792	0.240924	0.323692	0.766679	0.0523979	0.0701154	0.131716	0.0344827	0.226655	1.10286	0.0308935	0.00107854	0.774423	0.0209242	0.326131
k__Bacteria; p__Bacteroidetes; c__Bacteroidia; o__Bacteroidales; f__RF16; g__; s__	829	0.0551018	2.61376	0.00529433	0.000864952	0.00752475	0.00238964	0.0116153	0	0.00108072	0.00180578	0.00114557	0.0176773	0.00117987	0	0.0231111	0.00960127	0	0.00690369	0	0	0	0.00836377	0	0	0	0	0	0.00288061	0	0	0	0	0
k__Bacteria; p__Bacteroidetes; c__Bacteroidia; o__Bacteroidales; f__RF16; g__; s__	830	0.0240997	#DIV/0!	0.00343661	0	0.0044733	0	0	0	0.00837559	0.00939008	0.00916456	0.000552416	0	0.0020228	0.000577778	0.00619437	0	0.0118349	0	0	0	0	0	0	0	0	0	0	0	0	0	0	0
k__Bacteria; p__Bacteroidetes; c__Bacteroidia; o__Bacteroidales; f__RF16; g__; s__	831	0.0872868	-0.0595246	0.023529	0.0245201	0.0249541	0.0583572	0.0309741	0	0.00945632	0.0541735	0.0229114	0.0204394	0.0410005	0.0900145	0.00288889	0.012079	0.027972	0.00394497	0	0.013552	0.0013105	0.0557585	0.00130995	0	0	0	0	0.206581	0	0	0.053802	0	0
k__Bacteria; p__Bacteroidetes; c__Bacteroidia; o__Bacteroidales; f__RF16; g__; s__	832	0.0363236	2.71095	0.00260107	0.000397261	0.00286593	0.0011149	0	0	0.0027018	0.00433388	0.00143196	0.00469554	0.000884904	0.00505699	0.00635555	0.00898183	0	0.00197248	0	0	0	0	0.00392984	0	0	0	0	0.00123455	0	0	0	0	0
k__Bacteria; p__Bacteroidetes; c__Bacteroidia; o__Bacteroidales; f__RF16; g__; s__	833	0.0173895	8.24743	0.0116824	3.84422e-05	0.0183889	0.000138605	0	0	0.00027018	0.0151686	0.00229114	0.062423	0.0144534	0.0020228	0.0392889	0	0	0	0.00956602	0.0180693	0	0	0	0	0	0.000499749	0	0	0	0	0	0	0
k__Bacteria; p__Bacteroidetes; c__Bacteroidia; o__Bacteroidales; f__RF16; g__; s__	834	0.00959346	1.93572	0.0492092	0.0128628	0.0554444	0.0310857	0.0309741	0.12256	0.0140494	0.0678975	0.0375174	0.0149152	0.205888	0.0586611	0.0476666	0.0034069	0.0407925	0.00394497	0	0.0406559	0	0.0669101	0	0	0	0	0	0.00411516	0	0	0.0961915	0	0
k__Bacteria; p__Bacteroidetes; c__Bacteroidia; o__Bacteroidales; f__RF16; g__; s__	835	0.206077	-2.15539	0.0032047	0.0142766	0.00719424	0.024312	0	0	0.00783523	0.000722314	0.0269209	0.000276208	0.00412955	0.0020228	0	0	0	0.00295873	0	0	0.00393149	0.036243	0.00523979	0.00713038	0.0146076	0.000249874	0.0316262	0.0843608	0.00220668	0	0	0	0
k__Bacteria; p__Bacteroidetes; c__Bacteroidia; o__Bacteroidales; f__RF16; g__; s__	836	0.00575111	1.98361	0.0638131	0.0161356	0.0548786	0.0269247	0.050333	0.0262628	0.0113476	0.0379215	0.107684	0.0585561	0.164592	0.052087	0.195867	0.0625631	0.0407925	0.028601	0.019132	0.0376444	0.0013105	0.0669101	0	0.0285215	0	0	0.00155031	0.078188	0.00882671	0	0.0244555	0	0
k__Bacteria; p__Bacteroidetes; c__Bacteroidia; o__Bacteroidales; f__RF16; g__; s__	837	0.55066	0.283142	0.00173515	0.00142594	0.00172499	0.00210017	0	0	0	0.00216694	0.00544146	0.00386691	0.00147484	0.0025285	0.000866666	0.00247775	0.0034965	0.00197248	0	0	0.00524198	0	0	0.0011884	0	0	0.00310061	0.00411516	0	0	0.00489109	0	0
k__Bacteria; p__Bacteroidetes; c__Bacteroidia; o__Bacteroidales; f__RF16; g__; s__	838	0.011125	#DIV/0!	0.00944066	0	0.014958	0	0.0348459	0	0.000540361	0	0.000572785	0.000828624	0.0117987	0.04703	0.00375555	0.0207511	0	0	0	0.0120462	0	0	0	0	0	0	0	0	0	0	0	0	0
k__Bacteria; p__Bacteroidetes; c__Bacteroidia; o__Bacteroidales; f__RF16; g__; s__	839	0.190108	0.0371857	0.00327754	0.00319414	0.00301821	0.0060741	0.00387177	0	0.000540361	0.000361157	0.00458228	0.0102197	0.0073742	0.00353989	0.00375555	0.00495549	0.0034965	0	0.00318867	0	0.0144155	0	0.0104796	0	0	0	0.000310061	0.0160491	0	0.000269635	0	0	0
k__Bacteria; p__Bacteroidetes; c__Bacteroidia; o__Bacteroidales; f__RF16; g__; s__	840	0.00221618	#DIV/0!	0.00394122	0	0.00357053	0	0	0.00875427	0	0.00361157	0.00945096	0.00662899	0.00855407	0.0010114	0.000577778	0.00278747	0	0.00591745	0.00637735	0.00150577	0	0	0	0	0	0	0	0	0	0	0	0	0
k__Bacteria; p__Bacteroidetes; c__Bacteroidia; o__Bacteroidales; f__Rikenellaceae; g__Blvii28; s__	841	0.879697	-0.385176	0.00148927	0.00194502	0.00240689	0.00293449	0	0.00875427	0.000540361	0	0.000572785	0.000552416	0	0	0.00173333	0.0034069	0.002331	0.00295873	0	0	0.00262099	0	0.0104796	0.00356519	0.00272345	0.00224887	0	0.000411516	0	0.00323562	0	0	0
k__Bacteria; p__Bacteroidetes; c__Bacteroidia; o__Bacteroidales; f__S24-7; g__; s__	842	0.575106	#NUM!	0	0.000616486	0	0.00153537	0	0	0	0	0	0	0	0	0	0	0	0	0	0	0	0	0	0.00475359	0	0	0	0	0	0	0.00326073	0	0
k__Bacteria; p__Bacteroidetes; c__Bacteroidia; o__Bacteroidales; f__S24-7; g__; s__	843	0.000967903	3.15858	0.0582507	0.00652337	0.0537458	0.0142531	0.0348459	0.113805	0.0713276	0.00216694	0.0650111	0.0522033	0.0713822	0.0166881	0.0846444	0.204104	0.0011655	0.00197248	0.0510188	0.0451732	0	0.0111517	0	0	0	0.000999498	0	0.0251025	0	0.000269635	0.0472806	0	0
k__Bacteria; p__Bacteroidetes; c__Bacteroidia; o__Bacteroidales; f__S24-7; g__; s__	844	0.00403061	2.11519	0.0131641	0.00303847	0.0110578	0.00787094	0.0309741	0	0.0132388	0.000361157	0.00315032	0.00138104	0.0256622	0.0166881	0.0124222	0.00216803	0.032634	0.0147936	0.0127547	0.0180693	0	0.0111517	0	0.0011884	0	0	0	0.02716	0	0	0	0	0
k__Bacteria; p__Bacteroidetes; c__Bacteroidia; o__Bacteroidales; f__S24-7; g__; s__	845	0.249954	1.45514	0.0406531	0.014827	0.118298	0.041662	0.449125	0	0.0321515	0.000361157	0.0103101	0.0116007	0	0.0010114	0.0297555	0.000309718	0	0.0345185	0	0	0	0.150548	0.00130995	0	0	0	0.0108521	0.0300407	0	0	0	0	0
k__Bacteria; p__Bacteroidetes; c__Bacteroidia; o__Bacteroidales; f__S24-7; g__; s__	846	0.508559	0.910147	0.000528946	0.000281468	0.00104578	0.000735226	0	0	0	0	0	0	0.000294968	0.000505699	0.000866666	0.0034069	0.002331	0	0	0	0	0	0	0.0011884	0	0	0	0	0	0	0	0	0.00247069
k__Bacteria; p__Bacteroidetes; c__Bacteroidia; o__Bacteroidales; f__S24-7; g__; s__	847	1	#DIV/0!	0	0	0	0	0	0	0	0	0	0	0	0	0	0	0	0	0	0	0	0	0	0	0	0	0	0	0	0	0	0	0
k__Bacteria; p__Bacteroidetes; c__Bacteroidia; o__Bacteroidales; f__S24-7; g__; s__	848	0.000458554	8.57189	0.093654	0.000246111	0.100011	0.000772142	0.0232306	0.0612799	0.271531	0.0216694	0.0567057	0.0546892	0.119167	0.0399502	0.0546	0.0257066	0.00932401	0.0917205	0.130736	0.350845	0	0.00278792	0	0	0	0	0	0.000411516	0	0	0	0	0
k__Bacteria; p__Bacteroidetes; c__Bacteroidia; o__Bacteroidales; f__S24-7; g__; s__	849	0.00123317	3.02435	0.143222	0.0176031	0.115028	0.0530835	0.0348459	0.288891	0.183453	0.0025281	0.0610016	0.0679472	0.00442452	0.0222508	0.264911	0.271313	0.0827506	0.312639	0.19132	0.216832	0	0.192367	0.00261989	0	0.000247587	0	0	0.0283946	0	0.000269635	0	0	0.00494138
k__Bacteria; p__Bacteroidetes; c__Bacteroidia; o__Bacteroidales; f__S24-7; g__; s__	850	0.00139711	2.44038	0.0299393	0.00551588	0.0209977	0.0184888	0.0116153	0.0525256	0.032962	0.00722314	0.0555602	0.0336974	0.00265471	0.0288249	0.00924444	0.0250872	0.0011655	0.0473396	0.0510188	0.060231	0	0.0669101	0	0	0	0	0	0.00452667	0	0.000269635	0	0	0
k__Bacteria; p__Bacteroidetes; c__Bacteroidia; o__Bacteroidales; f__S24-7; g__; s__	851	0.00123317	2.52043	0.0507865	0.00885164	0.0586591	0.0300453	0.13164	0.0437713	0.025397	0.000722314	0.00801899	0.0977776	0.0141585	0.0566383	0.0335111	0.0173442	0.00699301	0.0670645	0.00318867	0.204785	0	0.108729	0	0	0.00074276	0.000249874	0	0.00534971	0	0	0	0	0
k__Bacteria; p__Bacteroidetes; c__Bacteroidia; o__Bacteroidales; f__S24-7; g__; s__	852	0.0197237	3.1448	0.040532	0.00458268	0.0662623	0.00916239	0.0116153	0	0.0262075	0.00541735	0.000286393	0.0190584	0.00442452	0.0510756	0.204822	0.0480063	0.178322	0.0118349	0.00637735	0	0.0170364	0.0306671	0.00261989	0.00475359	0	0.00449774	0	0	0	0	0	0	0
k__Bacteria; p__Bacteroidetes; c__Bacteroidia; o__Bacteroidales; f__S24-7; g__; s__	853	0.2764	0.240832	0.058905	0.0498488	0.0834165	0.0835223	0.0580765	0	0.0178319	0.000722314	0.0128877	0.0190584	0.054864	0.0783834	0.107756	0.317771	0.110723	0.00788994	0.019132	0.0195751	0	0.156124	0.00392984	0.180636	0	0.00149925	0.00465092	0.0078188	0.0308935	0	0.0228251	0	0.239657
k__Bacteria; p__Bacteroidetes; c__Bacteroidia; o__Bacteroidales; f__S24-7; g__; s__	854	0.0939245	#DIV/0!	0.0012211	0	0.00227317	0	0	0	0.000540361	0	0	0	0.00117987	0.00455129	0.0078	0.00185831	0.0011655	0	0	0	0	0	0	0	0	0	0	0	0	0	0	0	0
k__Bacteria; p__Bacteroidetes; c__Bacteroidia; o__Bacteroidales; f__S24-7; g__; s__	855	0.330922	-8.54652	1.97291e-05	0.00737676	7.38197e-05	0.0134074	0	0	0	0	0	0.000276208	0	0	0	0	0	0	0	0	0	0	0	0	0.00866553	0.0169915	0	0	0	0.031008	0	0.0392329	0
k__Bacteria; p__Bacteroidetes; c__Bacteroidia; o__Bacteroidales; f__S24-7; g__; s__	856	0.786803	#NUM!	0	0.000403229	0	0.00145386	0	0	0	0	0	0	0	0	0	0	0	0	0	0	0.00524198	0	0	0	0	0	0	0	0	0	0	0	0
k__Bacteria; p__Bacteroidetes; c__Bacteroidia; o__Bacteroidales; f__S24-7; g__; s__	857	0.000898693	2.14753	0.0246475	0.00556292	0.0241282	0.0192838	0.0309741	0.0175085	0.0232355	0.00613967	0.022625	0.029278	0.0247773	0.00505699	0.0803111	0.00433606	0.0034965	0.00591745	0.0733395	0.0180693	0	0.0696981	0.00261989	0	0	0	0	0	0	0	0	0	0
k__Bacteria; p__Bacteroidetes; c__Bacteroidia; o__Bacteroidales; f__S24-7; g__; s__	858	0.16748	#DIV/0!	0.0018171	0	0.00344846	0	0	0	0.0013509	0	0	0.00276208	0	0.0111254	0.00231111	0	0	0.00788994	0	0	0	0	0	0	0	0	0	0	0	0	0	0	0
k__Bacteria; p__Bacteroidetes; c__Bacteroidia; o__Bacteroidales; f__S24-7; g__; s__	859	0.16748	#DIV/0!	0.00502276	0	0.011023	0	0	0.0175085	0.0391762	0	0	0.00552416	0	0	0.0078	0.000309718	0	0	0	0	0	0	0	0	0	0	0	0	0	0	0	0	0
k__Bacteria; p__Bacteroidetes; c__Bacteroidia; o__Bacteroidales; f__S24-7; g__; s__	860	0.000551991	-6.75223	0.00246786	0.266039	0.00381122	0.17676	0.00387177	0	0	0	0	0.0121532	0.000589936	0	0.00635555	0.000929155	0.00815851	0.000986242	0	0.00150577	0.167743	0.00557585	0.326177	0.0855645	0.446399	0.314842	0.0511601	0.00123455	0.432509	0.378298	0.405961	0.45144	0.391605
k__Bacteria; p__Bacteroidetes; c__Bacteroidia; o__Bacteroidales; f__S24-7; g__; s__	861	0.000497244	7.47439	0.0335732	0.00018879	0.0542114	0.000610149	0.0116153	0.0350171	0.0108072	0.000361157	0.000572785	0.00883866	0.00117987	0.0020228	0.0127111	0.068138	0.0151515	0.203166	0.0733395	0.0271039	0	0	0	0	0.000247587	0	0	0	0.00220668	0	0	0	0
k__Bacteria; p__Bacteroidetes; c__Bacteroidia; o__Bacteroidales; f__S24-7; g__; s__	862	0.731306	1.13458	0.000490833	0.000223558	0.000943996	0.000495526	0	0	0.00162108	0	0	0	0	0.000505699	0.00173333	0	0	0	0	0.00301155	0.0013105	0	0	0	0.000247587	0	0	0	0	0.00134817	0	0	0
k__Bacteria; p__Bacteroidetes; c__Bacteroidia; o__Bacteroidales; f__S24-7; g__; s__	863	0.000967903	4.32949	0.0262869	0.00130747	0.0303238	0.00463375	0.0309741	0	0.0191828	0.00288925	0.0077326	0.0378405	0.0106188	0.0030342	0.0381333	0.0337593	0.013986	0.0276148	0.12117	0.0210808	0	0.0167275	0	0	0	0	0	0	0	0.000269635	0	0	0
k__Bacteria; p__Bacteroidetes; c__Bacteroidia; o__Bacteroidales; f__S24-7; g__; s__	864	0.0153234	2.66655	0.0499383	0.00786541	0.0882653	0.0148982	0.0425894	0	0.00999668	0.00397273	0.00343671	0.0417074	0.00117987	0.00657409	0.0112667	0.00619437	0.301865	0.0532571	0.194509	0.0225866	0	0.0418188	0.0261989	0.0320867	0	0.000499749	0	0.00164606	0	0	0	0	0
k__Bacteria; p__Bacteroidetes; c__Bacteroidia; o__Bacteroidales; f__S24-7; g__; s__	865	0.0020408	3.0544	0.054721	0.00658702	0.0612718	0.0231534	0.166486	0.0350171	0.0154003	0.0025281	0.0191883	0.0789955	0.0407056	0.00556269	0.0667333	0.0213706	0	0.192317	0.105226	0.0165635	0	0.0836377	0	0.0011884	0.000495173	0	0.000310061	0	0	0	0	0	0
k__Bacteria; p__Bacteroidetes; c__Bacteroidia; o__Bacteroidales; f__S24-7; g__; s__	866	0.00139711	1.88619	0.112504	0.0304346	0.0839528	0.104839	0.154871	0.175085	0.112665	0.00686198	0.0484004	0.133961	0.117397	0.0490528	0.112956	0.00402634	0.037296	0.181469	0.322056	0.118956	0	0.379157	0.0130995	0	0.000247587	0.00149925	0	0.00164606	0	0	0	0	0
k__Bacteria; p__Bacteroidetes; c__Bacteroidia; o__Bacteroidales; f__S24-7; g__; s__	867	0.000514711	#DIV/0!	0.0160664	0	0.0159357	0	0.0580765	0.0350171	0.00783523	0	0.00429589	0.0118769	0.0176981	0.00910259	0.0187778	0.000309718	0.0034965	0.0207111	0.0286981	0.00903465	0	0	0	0	0	0	0	0	0	0	0	0	0
k__Bacteria; p__Bacteroidetes; c__Bacteroidia; o__Bacteroidales; f__S24-7; g__; s__	868	0.0145849	1.30347	0.00537137	0.00217621	0.00721377	0.00772363	0.0271024	0.00875427	0.00918614	0.000361157	0.00887817	0.0069052	0.000589936	0	0.00375555	0.00247775	0.0011655	0	0	0.0060231	0	0.0278792	0	0	0	0	0	0.000411516	0	0	0	0	0
k__Bacteria; p__Bacteroidetes; c__Bacteroidia; o__Bacteroidales; f__S24-7; g__; s__	869	0.000622117	10.9595	0.275003	0.000138099	0.646519	0.000346016	0	0.166331	0.0118879	0.0025281	0.01747	0.00580037	0.0165182	0.000505699	0.00548889	2.31793	1.02797	0.0453671	0.169	0.0632425	0	0	0	0	0	0.000249874	0.000310061	0	0	0	0	0	0.00123535
k__Bacteria; p__Bacteroidetes; c__Bacteroidia; o__Bacteroidales; f__S24-7; g__; s__	870	0.000514711	9.76933	0.0166205	1.90451e-05	0.0140819	6.86682e-05	0.0116153	0.0175085	0.0302602	0.0101124	0.0128877	0.0361832	0.0412955	0.0015171	0.0381333	0.0130082	0	0.00493121	0.00318867	0.0120462	0	0	0	0	0.000247587	0	0	0	0	0	0	0	0
k__Bacteria; p__Bacteroidetes; c__Bacteroidia; o__Bacteroidales; f__S24-7; g__; s__	871	0.011125	7.34806	0.073499	0.000451123	0.160117	0.000932884	0.100666	0	0.00378253	0.000722314	0.0126013	0.00469554	0.142175	0.0839461	0.604933	0.000619437	0	0	0.0733395	0.00150577	0	0.00278792	0	0	0	0.000249874	0.000620122	0	0.00220668	0	0	0	0
k__Bacteria; p__Bacteroidetes; c__Bacteroidia; o__Bacteroidales; f__S24-7; g__; s__	872	0.00737679	3.55711	0.00757279	0.000643367	0.0130533	0.00231969	0.0116153	0	0.00999668	0.000722314	0.00171836	0.00441933	0.00176981	0	0.00693333	0.00588465	0	0.00591745	0.0510188	0.0060231	0	0.00836377	0	0	0	0	0	0	0	0	0	0	0
k__Bacteria; p__Bacteroidetes; c__Bacteroidia; o__Bacteroidales; f__S24-7; g__; s__	873	0.00139711	3.36701	0.557507	0.0540354	0.891504	0.180894	0.135512	2.38116	0.61331	0.0104735	2.71672	0.11656	0.106778	0.100634	0.110067	0.0430508	0.00699301	0.458602	0.0159434	0.989294	0	0.655162	0.0104796	0	0.000247587	0.000499749	0	0.0358019	0	0.000269635	0	0	0
k__Bacteria; p__Bacteroidetes; c__Bacteroidia; o__Bacteroidales; f__S24-7; g__; s__	874	0.000967903	#DIV/0!	0.017583	0	0.0217305	0	0	0.0175085	0.0216144	0.000722314	0.00257753	0.00911486	0.00176981	0.0278135	0.0476666	0.000309718	0	0.0414222	0.00637735	0.0692656	0	0	0	0	0	0	0	0	0	0	0	0	0
k__Bacteria; p__Bacteroidetes; c__Bacteroidia; o__Bacteroidales; f__S24-7; g__; s__	875	0.16748	2.25722	0.00420014	0.000878564	0.00924748	0.00308759	0.00387177	0	0.00405271	0	0.00229114	0.00303829	0	0.0015171	0.00895555	0	0	0	0.0350754	0	0	0.0111517	0	0	0	0	0	0	0	0.000269635	0	0	0
k__Bacteria; p__Bacteroidetes; c__Bacteroidia; o__Bacteroidales; f__S24-7; g__; s__	876	0.047746	6.45134	0.00831557	9.50266e-05	0.0135764	0.000342623	0	0	0.00297198	0	0	0	0.000294968	0.000505699	0.000288889	0	0.027972	0.0197248	0.0255094	0.0391501	0	0	0	0	0	0	0	0	0	0	0	0	0.00123535
k__Bacteria; p__Bacteroidetes; c__Bacteroidia; o__Bacteroidales; f__S24-7; g__; s__	877	0.0492719	#DIV/0!	0.00131861	0	0.00217021	0	0	0	0.000540361	0	0.00171836	0	0	0.000505699	0.000866666	0.00712352	0	0	0.00318867	0.00451732	0	0	0	0	0	0	0	0	0	0	0	0	0
k__Bacteria; p__Bacteroidetes; c__Bacteroidia; o__Bacteroidales; f__S24-7; g__; s__	878	0.2764	#DIV/0!	0.00213114	0	0.00770257	0	0	0	0	0.000361157	0	0.000276208	0	0	0.0288889	0.000309718	0	0	0	0	0	0	0	0	0	0	0	0	0	0	0	0	0
k__Bacteria; p__Bacteroidetes; c__Bacteroidia; o__Bacteroidales; f__S24-7; g__; s__	879	0.2764	#DIV/0!	0.000125037	0	0.000216248	0	0	0	0.000540361	0.000361157	0.000572785	0.000276208	0	0	0	0	0	0	0	0	0	0	0	0	0	0	0	0	0	0	0	0	0
k__Bacteria; p__Bacteroidetes; c__Bacteroidia; o__Bacteroidales; f__S24-7; g__; s__	880	0.948646	-1.26408	0.00274626	0.00659582	0.00599466	0.0173115	0.0154871	0	0.00405271	0	0	0	0	0	0.00115556	0	0	0.0177524	0	0	0	0.0250913	0	0.0594198	0	0	0	0.00123455	0	0	0	0	0
k__Bacteria; p__Bacteroidetes; c__Bacteroidia; o__Bacteroidales; f__S24-7; g__; s__	881	0.00502736	#DIV/0!	0.00238121	0	0.00345519	0	0	0	0.0113476	0.000722314	0.000572785	0.00220966	0.00560439	0	0.000866666	0.000309718	0	0.000986242	0.00318867	0.00752887	0	0	0	0	0	0	0	0	0	0	0	0	0
k__Bacteria; p__Bacteroidetes; c__Bacteroidia; o__Bacteroidales; f__S24-7; g__; s__	882	0.239594	#NUM!	0	0.00208419	0	0.00457245	0	0	0	0	0	0	0	0	0	0	0	0	0	0	0	0	0	0.00237679	0	0	0	0	0	0	0.0163036	0.00470795	0.00370604
k__Bacteria; p__Bacteroidetes; c__Bacteroidia; o__Bacteroidales; f__S24-7; g__; s__	883	1	#DIV/0!	0	0	0	0	0	0	0	0	0	0	0	0	0	0	0	0	0	0	0	0	0	0	0	0	0	0	0	0	0	0	0
k__Bacteria; p__Bacteroidetes; c__Bacteroidia; o__Bacteroidales; f__S24-7; g__; s__	884	0.661359	0.22218	0.000454363	0.000389511	0.00109965	0.00131404	0	0	0.00405271	0	0	0.000276208	0	0	0.000866666	0	0.0011655	0	0	0	0	0	0	0.00475359	0	0	0.000310061	0	0	0	0	0	0
k__Bacteria; p__Bacteroidetes; c__Bacteroidia; o__Bacteroidales; f__S24-7; g__; s__	885	0.239594	#NUM!	0	0.00091063	0	0.00165194	0	0	0	0	0	0	0	0	0	0	0	0	0	0	0.00524198	0.00278792	0.00261989	0.0011884	0	0	0	0	0	0	0	0	0
k__Bacteria; p__Bacteroidetes; c__Flavobacteriia; o__Flavobacteriales; f__Flavobacteriaceae; g__; s__	886	1	#DIV/0!	0	0	0	0	0	0	0	0	0	0	0	0	0	0	0	0	0	0	0	0	0	0	0	0	0	0	0	0	0	0	0
k__Bacteria; p__Chloroflexi; c__Anaerolineae; o__Anaerolineales; f__Anaerolinaceae; g__SHD-231; s__	887	0.000622117	3.14586	0.265446	0.02999	0.100057	0.0794854	0.220691	0.253874	0.0621415	0.232946	0.264054	0.386139	0.296443	0.293811	0.182867	0.399227	0.358974	0.165689	0.40815	0.191233	0	0.114305	0	0	0.000495173	0.000999498	0	0.272835	0	0	0	0	0.00123535
k__Bacteria; p__Chloroflexi; c__Anaerolineae; o__Anaerolineales; f__Anaerolinaceae; g__SHD-231; s__	888	0.000458554	7.28869	0.0216239	0.000138299	0.0122848	0.000429738	0.0193588	0.00875427	0.00945632	0.0173355	0.0134605	0.0566226	0.0206477	0.0146653	0.0208	0.0247775	0.0174825	0.0374772	0.0223207	0.0195751	0	0	0	0	0.000247587	0	0.00155031	0	0	0	0	0	0
k__Bacteria; p__Chloroflexi; c__Anaerolineae; o__Anaerolineales; f__Anaerolinaceae; g__SHD-231; s__	889	0.0079623	1.50306	0.0222152	0.00783761	0.0209261	0.0202112	0.0193588	0	0.00675451	0.00541735	0.00572785	0.0370119	0.0265471	0.0030342	0.0213778	0.0278747	0.004662	0.0522708	0.0286981	0.0722772	0	0.0669101	0	0	0	0	0	0.0349788	0	0	0	0	0
k__Bacteria; p__Chloroflexi; c__Anaerolineae; o__Anaerolineales; f__Anaerolinaceae; g__SHD-231; s__	890	0.308192	-2.03412	0.00896464	0.0367168	0.00854089	0.0635667	0	0.00875427	0.00675451	0.00577851	0.000572785	0.00497174	0.027137	0.0141596	0.0052	0.000619437	0.0244755	0.0128211	0.0127547	0.00150577	0.0183469	0.0696981	0.00392984	0.0130724	0.00420897	0.00449774	0.00806159	0.0934141	0	0.0105158	0.226621	0.00889279	0.0160595
k__Bacteria; p__Chloroflexi; c__Anaerolineae; o__Anaerolineales; f__Anaerolinaceae; g__SHD-231; s__	891	0.000967903	3.00882	0.150826	0.0187384	0.14752	0.0449349	0.205204	0.0262628	0.0413376	0.186718	0.0355127	0.110483	0.116807	0.123896	0.0713555	0.139373	0.276224	0.0808718	0.602659	0.0948638	0.0144155	0.0641222	0	0.00356519	0.00173311	0.000249874	0.000930184	0.156376	0.00220668	0	0	0	0
k__Bacteria; p__Chloroflexi; c__Anaerolineae; o__Anaerolineales; f__Anaerolinaceae; g__SHD-231; s__	892	0.000514711	3.70969	0.135953	0.0103911	0.104023	0.0242137	0.108409	0.157577	0.0205337	0.0863165	0.0378038	0.152191	0.04631	0.291283	0.0733777	0.10964	0.130536	0.0946792	0.404962	0.189728	0	0.0613343	0.00261989	0.0011884	0	0	0	0.0683116	0	0	0.00163036	0	0
k__Bacteria; p__Chloroflexi; c__Anaerolineae; o__Anaerolineales; f__Anaerolinaceae; g__SHD-231; s__	893	0.0454404	-1.4966	0.000371077	0.00104709	0.00081337	0.000985696	0	0	0.00027018	0	0	0	0.000294968	0.000505699	0	0	0.0011655	0.00295873	0	0	0.0013105	0	0	0.0011884	0.000990347	0.000749623	0.000930184	0.00164606	0	0.000269635	0.00163036	0.00366174	0.00123535
k__Bacteria; p__Chloroflexi; c__Anaerolineae; o__Anaerolineales; f__Anaerolinaceae; g__SHD-231; s__	894	0.000458554	-8.67694	1.92986e-05	0.00789849	7.22088e-05	0.00798759	0	0	0.00027018	0	0	0	0	0	0	0	0	0	0	0	0.00655248	0.0111517	0.00523979	0.00713038	0.000495173	0.00174912	0.00341067	0.0279831	0.00441335	0.00404452	0.0211947	0.00313863	0.00617673
k__Bacteria; p__Chloroflexi; c__Anaerolineae; o__Anaerolineales; f__Anaerolinaceae; g__SHD-231; s__	895	0.0010873	2.54461	0.030628	0.00524947	0.0270008	0.0098639	0.0116153	0.00875427	0.00891595	0.0148074	0.0111693	0.0422598	0.04572	0.0495585	0.0216667	0.0188928	0.041958	0.0345185	0.108415	0.0105404	0.00393149	0	0	0.011884	0	0.000249874	0.00155031	0.00576122	0.00662003	0.000808904	0.035868	0.00156932	0
k__Bacteria; p__Chloroflexi; c__Anaerolineae; o__Anaerolineales; f__Anaerolinaceae; g__SHD-231; s__	896	0.00123317	3.58463	0.0657557	0.00548088	0.116362	0.0184889	0.425894	0.0175085	0.0264777	0.00722314	0.00114557	0.00386691	0.191729	0.030342	0.000866666	0.000619437	0.113054	0.028601	0.0446414	0.0286097	0	0.0669101	0.00392984	0	0	0	0	0.000411516	0	0	0	0	0
k__Bacteria; p__Chloroflexi; c__Anaerolineae; o__Anaerolineales; f__Anaerolinaceae; g__SHD-231; s__	897	0.0240997	-2.37825	0.000500754	0.00260345	0.000591257	0.00306902	0	0	0.000540361	0	0	0.000828624	0.000294968	0.0010114	0.000577778	0.000619437	0.0011655	0.00197248	0	0	0.010484	0	0.00392984	0.00713038	0.00123793	0.00274862	0.00155031	0.00288061	0	0.00107854	0	0.00156932	0.00123535
k__Bacteria; p__Chloroflexi; c__Anaerolineae; o__Anaerolineales; f__Anaerolinaceae; g__SHD-231; s__	898	0.000967903	#DIV/0!	0.0117019	0	0.00955319	0	0	0.0175085	0.00216144	0.018419	0.00200475	0.0209918	0.0150434	0.0323648	0.0127111	0.0102207	0.00932401	0.00394497	0.019132	0	0	0	0	0	0	0	0	0	0	0	0	0	0
k__Bacteria; p__Chloroflexi; c__Anaerolineae; o__Anaerolineales; f__Anaerolinaceae; g__SHD-231; s__	899	0.977175	-0.382331	0.000856437	0.00111632	0.00115558	0.00191707	0	0	0.00216144	0.00144463	0.00257753	0.0033145	0	0	0	0	0	0.000986242	0	0.00150577	0.00262099	0.00557585	0	0	0	0.00124937	0	0.00452667	0	0.00053927	0	0	0
k__Bacteria; p__Cyanobacteria; c__4C0d-2; o__YS2; f__; g__; s__	900	0.190108	0.208776	0.0442986	0.0383303	0.0392109	0.0641313	0.0193588	0.0175085	0.00216144	0.0306983	0.0959415	0.0430884	0.146599	0.0829347	0.0410222	0.012079	0.0431235	0.0157799	0.0382641	0.0316213	0.0340729	0.00557585	0.00261989	0	0.0240159	0.228885	0.00868171	0.000823032	0.0198601	0.0053927	0.0554324	0.103052	0.00988277
k__Bacteria; p__Cyanobacteria; c__4C0d-2; o__YS2; f__; g__; s__	901	0.206077	-0.570662	0.00402517	0.0059782	0.00721687	0.0159464	0	0	0.00675451	0.00433388	0.00143196	0.0127056	0.00117987	0.0257907	0.000577778	0.000619437	0	0.00295873	0	0	0	0	0	0	0	0	0.00155031	0.0205758	0	0	0	0	0.0555906
k__Bacteria; p__Cyanobacteria; c__4C0d-2; o__YS2; f__; g__; s__	902	0.000514711	4.33688	0.0499549	0.002472	0.0845487	0.0056521	0.0309741	0.00875427	0.00702469	0.0964289	0.0392358	0.0508223	0.332429	0.0242736	0.0156	0.0306621	0.0174825	0.0128211	0.0223207	0.0105404	0	0.00557585	0	0	0	0	0	0.00699577	0	0	0.0195644	0	0
k__Bacteria; p__Cyanobacteria; c__4C0d-2; o__YS2; f__; g__; s__	903	0.000967903	4.20066	0.0188944	0.00102757	0.0180211	0.00310246	0.00387177	0.0262628	0.0027018	0.0465892	0.0108829	0.0356308	0.0613533	0.0207337	0.0147333	0.0167248	0.00932401	0.00295873	0.0127547	0	0	0.0111517	0	0	0	0	0	0	0.00220668	0	0	0	0
k__Bacteria; p__Cyanobacteria; c__4C0d-2; o__YS2; f__; g__; s__	904	0.00187704	-7.82928	0.000236319	0.053746	0.000809669	0.105856	0	0	0.00027018	0	0	0.00303829	0	0	0	0	0	0	0	0	0.393149	0.0334551	0.0222691	0.0011884	0.0158455	0.0204897	0.0855769	0.00164606	0	0	0.0749967	0.00313863	0.0469431
k__Bacteria; p__Cyanobacteria; c__4C0d-2; o__YS2; f__; g__; s__	905	0.00840891	-8.64684	1.97291e-05	0.007908	7.38197e-05	0.0105997	0	0	0	0	0	0.000276208	0	0	0	0	0	0	0	0	0.0314519	0	0.0275089	0.00475359	0.00173311	0.0107446	0.0055811	0.00123455	0	0.00512306	0.0146733	0	0
k__Bacteria; p__Cyanobacteria; c__4C0d-2; o__YS2; f__; g__; s__	906	1	-1.07125	0.0153948	0.0323483	0.0261531	0.0538692	0	0	0.00783523	0.023114	0.101669	0.00248587	0.0259572	0.0030342	0.00808889	0.00278747	0.0174825	0.0108487	0.00318867	0.00903465	0.162501	0.00836377	0.107416	0.0106956	0	0.000499749	0.0133326	0	0	0.0070105	0.00489109	0.00575416	0.100063
k__Bacteria; p__Cyanobacteria; c__4C0d-2; o__YS2; f__; g__; s__	907	1	#DIV/0!	0	0	0	0	0	0	0	0	0	0	0	0	0	0	0	0	0	0	0	0	0	0	0	0	0	0	0	0	0	0	0
k__Bacteria; p__Cyanobacteria; c__4C0d-2; o__YS2; f__; g__; s__	908	0.00123317	6.30732	0.0169836	0.000214456	0.0186154	0.000773231	0.00387177	0.0175085	0.0013509	0.0158909	0.024057	0.0160201	0.0312666	0.0318591	0.00895555	0.0696866	0.0034965	0.0138074	0	0	0	0.00278792	0	0	0	0	0	0	0	0	0	0	0
k__Bacteria; p__Cyanobacteria; c__4C0d-2; o__YS2; f__; g__; s__	909	0.00266011	2.05051	0.0423389	0.0102206	0.0293868	0.0237888	0.0232306	0.113805	0.00324217	0.0678975	0.0335079	0.061042	0.0657778	0.0475357	0.0182	0.0452189	0.0104895	0.0335322	0.0542075	0.0150577	0.010484	0.0446068	0	0	0	0	0	0.0777765	0	0	0	0	0
k__Bacteria; p__Cyanobacteria; c__4C0d-2; o__YS2; f__; g__; s__	910	0.00959346	2.06341	0.0116684	0.00279166	0.0124617	0.00362644	0.00387177	0.00875427	0.00027018	0.0155297	0.000572785	0.0502699	0.00678426	0.0166881	0.0147333	0.0126985	0.004662	0.0147936	0.00318867	0.0105404	0.00393149	0	0.00130995	0.00950717	0.00198069	0.00299849	0.000310061	0	0	0.00350525	0.00163036	0	0.0111181
k__Bacteria; p__Cyanobacteria; c__4C0d-2; o__YS2; f__; g__; s__	911	0.0327944	1.45577	0.0505106	0.0184142	0.0493363	0.032232	0	0.0525256	0.0027018	0.113403	0.0979463	0.156886	0.0188779	0.0161824	0.0976444	0.0300427	0.0734266	0.00295873	0.0159434	0.0286097	0.0117945	0.0920014	0.00261989	0	0.00272345	0.0142428	0.00124024	0.0872414	0	0.019953	0.00652146	0.00104621	0
k__Bacteria; p__Cyanobacteria; c__4C0d-2; o__YS2; f__; g__; s__	912	0.385692	-2.75866	0.0151962	0.102843	0.014573	0.152043	0.0271024	0.0175085	0.0027018	0.0429777	0.00114557	0.00773382	0.0318565	0.0182052	0.0184889	0.00588465	0.0361305	0	0	0.00301155	0.491436	0.184003	0.0301288	0.0344635	0	0	0.0654229	0.0584353	0.331002	0	0	0	0.142065
k__Bacteria; p__Cyanobacteria; c__4C0d-2; o__YS2; f__; g__; s__	913	0.051879	2.92675	0.0207567	0.00272973	0.0435054	0.00702749	0	0.00875427	0.00297198	0.0166132	0.167253	0.035907	0.0253672	0.0156767	0.00693333	0	0.00815851	0.00295873	0	0	0.0248994	0	0	0	0	0.000249874	0	0.00164606	0	0.00053927	0.00815182	0	0
k__Bacteria; p__Cyanobacteria; c__4C0d-2; o__YS2; f__; g__; s__	914	0.00139711	2.47307	0.0432264	0.0077854	0.0464739	0.0234446	0.0116153	0.0612799	0.022425	0.138684	0.048114	0.15081	0.0259572	0.0242736	0.0395778	0.0486258	0.0034965	0.00887618	0.00637735	0.0150577	0	0.0139396	0.00130995	0.0011884	0	0	0	0.0847723	0	0	0	0	0
k__Bacteria; p__Cyanobacteria; c__4C0d-2; o__YS2; f__; g__; s__	915	0.0271866	2.56722	0.0400142	0.00675156	0.0561608	0.00839505	0.0193588	0.0437713	0.00351235	0.0487562	0.213076	0.0618706	0.0814111	0.000505699	0.00288889	0.0083624	0.013986	0.0502983	0.00637735	0.0060231	0.010484	0.0250913	0.0183392	0.00475359	0	0.000249874	0	0.00617274	0.00662003	0	0	0	0.0160595
k__Bacteria; p__Cyanobacteria; c__4C0d-2; o__YS2; f__; g__; s__	916	0.649791	-0.050877	0.0618384	0.0640581	0.0629489	0.092978	0.00774353	0.0525256	0.0397165	0.154936	0.135177	0.208537	0.064598	0.0662466	0.0150222	0.0709255	0.016317	0.0276148	0.00637735	0	0.010484	0.0446068	0.00130995	0	0.0173311	0.0682157	0.324324	0.188474	0.0639936	0.00323562	0.0619538	0.0340019	0.0148241
k__Bacteria; p__Cyanobacteria; c__4C0d-2; o__YS2; f__; g__; s__	917	0.0010873	10.499	0.0278159	1.92211e-05	0.0251228	6.93027e-05	0.0154871	0.0612799	0.000540361	0.0686198	0.0200475	0.0524795	0.0191729	0.0647295	0.0124222	0.0442897	0.0198135	0	0	0.0105404	0	0	0	0	0	0.000249874	0	0	0	0	0	0	0
k__Bacteria; p__Cyanobacteria; c__4C0d-2; o__YS2; f__; g__; s__	918	0.000514711	#DIV/0!	0.0763882	0	0.0870911	0	0.0387177	0.245119	0.00432289	0.254254	0.0246298	0.189202	0.0324465	0.0237679	0.0863777	0.0607048	0.048951	0	0.0127547	0.0481848	0	0	0	0	0	0	0	0	0	0	0	0	0
k__Bacteria; p__Cyanobacteria; c__4C0d-2; o__YS2; f__; g__; s__	919	0.0831188	1.35888	0.00840011	0.00327508	0.00819974	0.00733783	0	0.0262628	0.000540361	0.00686198	0.00486867	0.013258	0.0123886	0.0116311	0.0138667	0.00712352	0.0198135	0.000986242	0	0	0.00786297	0	0	0	0.0037138	0.000499749	0.00155031	0.0024691	0.0264801	0	0	0	0
k__Bacteria; p__Cyanobacteria; c__4C0d-2; o__YS2; f__; g__; s__	920	0.00152803	3.0451	0.0240638	0.0029154	0.0164959	0.0077961	0.0116153	0	0.00216144	0.029976	0.0246298	0.0530319	0.0510294	0.0379274	0.0384222	0.0263261	0.018648	0.0138074	0.0127547	0.0165635	0	0.0111517	0	0	0	0	0	0.0267485	0	0	0	0	0
k__Bacteria; p__Cyanobacteria; c__4C0d-2; o__YS2; f__; g__; s__	921	0.0428566	6.47082	0.0111238	0.000125413	0.0204608	0.000452182	0	0.0175085	0.0013509	0.0335876	0.0114557	0.0118769	0.073742	0.0010114	0.0052	0	0	0	0	0	0	0	0	0	0	0	0	0	0	0	0.00163036	0	0
k__Bacteria; p__Cyanobacteria; c__4C0d-2; o__YS2; f__; g__; s__	922	0.0197237	1.99166	0.00352494	0.000886342	0.00533416	0.00319575	0.00387177	0.00875427	0.00027018	0.0195025	0.000859178	0.00220966	0.00530942	0.0010114	0.00173333	0	0.00582751	0	0	0	0	0	0	0	0	0	0	0.0115224	0	0	0	0	0
k__Bacteria; p__Cyanobacteria; c__4C0d-2; o__YS2; f__; g__; s__	923	0.119579	-6.95257	0.0001665	0.0206228	0.000622987	0.0635828	0	0	0	0	0	0	0	0	0	0	0.002331	0	0	0	0.00786297	0	0	0	0.00148552	0	0.0173634	0	0.00882671	0	0.231512	0.00104621	0
k__Bacteria; p__Cyanobacteria; c__4C0d-2; o__YS2; f__; g__; s__	924	0.0939245	1.19706	0.0057469	0.00250659	0.0165072	0.00865148	0	0	0.0013509	0.0628413	0.00200475	0.00441933	0.00147484	0.0015171	0	0	0.002331	0	0	0.00451732	0.0013105	0	0	0	0	0	0	0.0312752	0	0	0	0	0
k__Bacteria; p__Cyanobacteria; c__4C0d-2; o__YS2; f__; g__; s__	925	1	#DIV/0!	0	0	0	0	0	0	0	0	0	0	0	0	0	0	0	0	0	0	0	0	0	0	0	0	0	0	0	0	0	0	0
k__Bacteria; p__Cyanobacteria; c__4C0d-2; o__YS2; f__; g__; s__	926	0.00737679	2.56661	0.0244819	0.00413255	0.056937	0.0133143	0.00774353	0.00875427	0.0097265	0.0119182	0.214222	0.00276208	0.064303	0.00353989	0.00202222	0.00743324	0	0.00394497	0.00637735	0	0	0.00557585	0	0	0	0	0	0.0481474	0	0	0	0	0
k__Bacteria; p__Cyanobacteria; c__4C0d-2; o__YS2; f__; g__; s__	927	0.00139711	5.4962	0.0100014	0.000221585	0.0110811	0.000798938	0	0.0262628	0	0.011557	0.00458228	0.014639	0.0339213	0.00859689	0.000577778	0.00526521	0.0011655	0.00493121	0.0255094	0.00301155	0	0	0	0	0	0	0	0.00288061	0	0	0	0	0
k__Bacteria; p__Cyanobacteria; c__4C0d-2; o__YS2; f__; g__; s__	928	0.000514711	#DIV/0!	0.0334323	0	0.0281939	0	0.0271024	0.0437713	0.000810541	0.0263645	0.0151788	0.0748524	0.0495546	0.103668	0.0294667	0.0244677	0.0198135	0.0394497	0	0.013552	0	0	0	0	0	0	0	0	0	0	0	0	0
k__Bacteria; p__Cyanobacteria; c__4C0d-2; o__YS2; f__; g__; s__	929	0.45033	0.365957	0.00266646	0.00206905	0.00393491	0.00682434	0	0.00875427	0.00405271	0.00758429	0.0103101	0.00662899	0	0	0	0	0	0	0	0	0	0	0	0	0	0	0	0.024691	0.00220668	0	0	0	0
k__Bacteria; p__Cyanobacteria; c__4C0d-2; o__YS2; f__; g__; s__	930	0.000794953	4.71583	0.0316107	0.00120289	0.0359422	0.00433709	0.0232306	0	0.00162108	0.0660917	0.0438181	0.0651851	0.131851	0.00910259	0.0225333	0.0182734	0.0174825	0.00394497	0.0318867	0.00752887	0	0	0	0	0	0	0	0.0156376	0	0	0	0	0
k__Bacteria; p__Cyanobacteria; c__4C0d-2; o__YS2; f__; g__; s__	931	0.00737679	3.14945	0.00842644	0.000949652	0.0076262	0.00342402	0	0	0	0.011557	0.0134605	0.0113245	0.0262521	0.0116311	0.0101111	0.00650409	0.0011655	0.000986242	0.0159434	0.00903465	0	0	0	0	0	0	0	0.0123455	0	0	0	0	0
k__Bacteria; p__Cyanobacteria; c__4C0d-2; o__YS2; f__; g__; s__	932	0.0271866	0.470914	0.0222674	0.0160661	0.0246207	0.0407773	0.0271024	0.00875427	0.00297198	0.073676	0.0197611	0.019887	0.0817061	0.00960829	0.0210889	0.014247	0.004662	0.00197248	0.0127547	0.013552	0.00786297	0.0223034	0	0	0	0.00874561	0.00465092	0.150203	0	0.00323562	0.00815182	0	0.00370604
k__Bacteria; p__Cyanobacteria; c__4C0d-2; o__YS2; f__; g__; s__	933	0.0153234	#NUM!	0	0.0239487	0	0.0581228	0	0	0	0	0	0	0	0	0	0	0	0	0	0	0.0013105	0.00278792	0	0	0	0.00899548	0.000310061	0	0.00220668	0.200878	0	0.00836969	0.0864742
k__Bacteria; p__Cyanobacteria; c__4C0d-2; o__YS2; f__; g__; s__	934	0.0271866	0.290719	0.0160808	0.013146	0.00959916	0.025632	0.0116153	0.00875427	0.00837559	0.0393661	0.00973735	0.021268	0.0203528	0.0171938	0.0210889	0.0300427	0.011655	0.00690369	0.0127547	0.0060231	0.0222784	0.0473947	0.00392984	0.00356519	0	0	0.00372073	0.0855953	0.00441335	0	0	0	0
k__Bacteria; p__Cyanobacteria; c__4C0d-2; o__YS2; f__; g__; s__	935	0.0492719	#DIV/0!	0.00174447	0	0.00225443	0	0	0	0	0.00108347	0	0.00276208	0.00707923	0.00455129	0.00173333	0.00371662	0.0034965	0	0	0	0	0	0	0	0	0	0	0	0	0	0	0	0
k__Bacteria; p__Cyanobacteria; c__4C0d-2; o__YS2; f__; g__; s__	936	0.000458554	#DIV/0!	0.0225269	0	0.0157645	0	0.0116153	0.00875427	0.00027018	0.0346711	0.00143196	0.0367357	0.0489647	0.0217451	0.0153111	0.0449092	0.020979	0.0305735	0.0318867	0.00752887	0	0	0	0	0	0	0	0	0	0	0	0	0
k__Bacteria; p__Cyanobacteria; c__4C0d-2; o__YS2; f__; g__; s__	937	0.0581978	-7.2859	0.000670791	0.104679	0.00250987	0.26214	0	0	0	0	0	0.00939107	0	0	0	0	0	0	0	0	0	0	0	0	0.15796	0.000249874	0.00775153	0	0	0.164208	0.017934	0.954668	0.0580612
k__Bacteria; p__Cyanobacteria; c__4C0d-2; o__YS2; f__; g__; s__	938	0.00235092	2.31513	0.0289906	0.0058255	0.0367195	0.0159999	0.0271024	0.00875427	0.00108072	0.00541735	0.0630064	0.0917011	0.118872	0.0141596	0.0361111	0.000619437	0.00582751	0.0147936	0.00637735	0.0120462	0	0.0195155	0	0	0	0.000249874	0	0.0559662	0	0	0	0	0
k__Bacteria; p__Cyanobacteria; c__4C0d-2; o__YS2; f__; g__; s__	939	0.0492719	#DIV/0!	0.00416637	0	0.00504699	0	0.00387177	0	0	0.0050562	0	0.0149152	0.00884904	0	0.0078	0.0114596	0	0	0.00637735	0	0	0	0	0	0	0	0	0	0	0	0	0	0
k__Bacteria; p__Cyanobacteria; c__4C0d-2; o__YS2; f__; g__; s__	940	0.0684362	1.71339	0.0239772	0.00731167	0.021713	0.0107994	0	0.0350171	0.00729487	0.00758429	0.0558466	0.0121532	0.0398207	0.0652352	0.0320667	0.00805268	0.034965	0	0	0.0376444	0.0013105	0	0	0	0.0344145	0.0142428	0.000310061	0	0.00220668	0.0186048	0	0.0177856	0.00617673
k__Bacteria; p__Cyanobacteria; c__4C0d-2; o__YS2; f__; g__; s__	941	0.135107	#NUM!	0	0.00278914	0	0.00632005	0	0	0	0	0	0	0	0	0	0	0	0	0	0	0.00917347	0	0.00130995	0	0.00123793	0	0	0	0.0220668	0	0	0	0.00247069
k__Bacteria; p__Cyanobacteria; c__4C0d-2; o__YS2; f__; g__; s__	942	0.000458554	5.67743	0.0245542	0.000479787	0.0182169	0.00153648	0.0425894	0.0350171	0.000810541	0.018419	0.0108829	0.0325925	0.0536841	0.052087	0.0404444	0.0244677	0.0011655	0.0128211	0.0127547	0.0060231	0	0.00557585	0	0	0	0.000249874	0	0.000411516	0	0	0	0	0
k__Bacteria; p__Cyanobacteria; c__4C0d-2; o__YS2; f__; g__; s__	943	0.0341146	-9.56401	4.25794e-05	0.0322294	0.000108331	0.0556401	0	0	0	0	0.000286393	0	0	0	0	0.000309718	0	0	0	0	0.191332	0.036243	0	0.00713038	0	0	0.0241848	0.0160491	0.0993005	0.000269635	0	0	0.0444724
k__Bacteria; p__Cyanobacteria; c__4C0d-2; o__YS2; f__; g__; s__	944	0.846161	-3.39166	0.000102549	0.00107627	0.000314296	0.00388055	0	0	0.00027018	0	0	0	0	0	0	0	0.0011655	0	0	0	0	0	0	0	0	0	0	0.0139915	0	0	0	0	0
k__Bacteria; p__Cyanobacteria; c__4C0d-2; o__YS2; f__; g__; s__	945	0.0712928	#NUM!	0	0.0160994	0	0.0482212	0	0	0	0	0	0	0	0	0	0	0	0	0	0	0	0	0	0	0	0.0107446	0	0.00370364	0.00220668	0.0156388	0	0.175763	0.00123535
k__Bacteria; p__Cyanobacteria; c__4C0d-2; o__YS2; f__; g__; s__	946	0.55066	1.99035	0.0199086	0.00501056	0.0744133	0.0103117	0	0	0.00027018	0	0	0	0.27845	0	0	0	0	0	0	0	0	0.00557585	0	0	0	0	0.0325564	0.00493819	0.0220668	0	0	0	0
k__Bacteria; p__Cyanobacteria; c__4C0d-2; o__YS2; f__; g__; s__	947	0.798659	#DIV/0!	2.21227e-05	0	8.27757e-05	0	0	0	0	0	0	0	0	0	0	0.000309718	0	0	0	0	0	0	0	0	0	0	0	0	0	0	0	0	0
k__Bacteria; p__Cyanobacteria; c__4C0d-2; o__YS2; f__; g__; s__	948	0.00221618	#DIV/0!	0.013348	0	0.0167547	0	0.0387177	0	0	0.0187802	0.0206203	0.0538606	0.00324465	0.00758549	0.00317778	0.00650409	0.0011655	0	0.0286981	0.00451732	0	0	0	0	0	0	0	0	0	0	0	0	0
k__Bacteria; p__Cyanobacteria; c__4C0d-2; o__YS2; f__; g__; s__	949	0.00502736	#DIV/0!	0.0165342	0	0.0215921	0	0	0	0	0.0317818	0.00143196	0.0314877	0.00294968	0.0743378	0.0184889	0.0213706	0.002331	0	0.0382641	0.00903465	0	0	0	0	0	0	0	0	0	0	0	0	0
k__Bacteria; p__Cyanobacteria; c__4C0d-2; o__YS2; f__; g__; s__	950	0.00139711	6.28101	0.016392	0.000210794	0.0164812	0.000683092	0	0	0.0013509	0.0317818	0.0040095	0.00745762	0.0268421	0.0409616	0.0505555	0.0154859	0.004662	0.0266285	0.00318867	0.0165635	0	0	0	0	0	0	0	0	0	0.000269635	0	0	0.00247069
k__Bacteria; p__Cyanobacteria; c__4C0d-2; o__YS2; f__; g__; s__	951	0.2764	#DIV/0!	0.00153625	0	0.0030126	0	0	0	0	0.00144463	0	0.0035907	0	0	0.0078	0.00867211	0	0	0	0	0	0	0	0	0	0	0	0	0	0	0	0	0
k__Bacteria; p__Cyanobacteria; c__4C0d-2; o__YS2; f__; g__; s__	952	0.000967903	#DIV/0!	0.0150715	0	0.0222427	0	0.0813071	0.00875427	0	0.032143	0.00114557	0.0143628	0.0082591	0.0030342	0.000288889	0.0133179	0.002331	0.036491	0.00956602	0	0	0	0	0	0	0	0	0	0	0	0	0	0
k__Bacteria; p__Cyanobacteria; c__4C0d-2; o__YS2; f__; g__; s__	953	0.977175	-0.895294	0.000825537	0.00153549	0.00214106	0.00535271	0	0	0	0.00686198	0	0.00469554	0	0	0	0	0	0	0	0	0	0	0	0	0	0	0.000620122	0.0193412	0	0	0	0	0
k__Bacteria; p__Cyanobacteria; c__4C0d-2; o__YS2; f__; g__; s__	954	0.0341146	#NUM!	0	0.00332036	0	0.00486706	0	0	0	0	0	0	0	0	0	0	0	0	0	0	0.0157259	0	0.00916962	0	0	0.00299849	0.00279055	0.000823032	0	0.00350525	0.00815182	0	0
k__Bacteria; p__Cyanobacteria; c__4C0d-2; o__YS2; f__; g__; s__	955	0.575106	-5.73978	0.00013509	0.0072189	0.000505461	0.0252678	0	0	0.00189126	0	0	0	0	0	0	0	0	0	0	0	0	0	0.00130995	0	0	0	0	0	0	0	0.0913004	0	0.00123535
k__Bacteria; p__Cyanobacteria; c__4C0d-2; o__YS2; f__; g__; s__	956	0.0492719	#DIV/0!	0.00222597	0	0.00620669	0	0.00387177	0	0.00027018	0.000361157	0.000572785	0.0234777	0	0	0.00144444	0	0.0011655	0	0	0	0	0	0	0	0	0	0	0	0	0	0	0	0
k__Bacteria; p__Cyanobacteria; c__4C0d-2; o__YS2; f__; g__; s__	957	0.011125	#DIV/0!	0.00274574	0	0.00341797	0	0	0	0	0.00975124	0.000859178	0.0033145	0.0082591	0.0010114	0	0.00185831	0	0.000986242	0.00637735	0.0060231	0	0	0	0	0	0	0	0	0	0	0	0	0
k__Bacteria; p__Cyanobacteria; c__4C0d-2; o__YS2; f__; g__; s__	958	0.0240997	#DIV/0!	0.00158795	0	0.00181675	0	0.00387177	0	0	0.00325041	0.00229114	0.0033145	0.00501445	0.0010114	0.000288889	0	0	0	0.00318867	0	0	0	0	0	0	0	0	0	0	0	0	0	0
k__Bacteria; p__Cyanobacteria; c__4C0d-2; o__YS2; f__; g__; s__	959	0.600367	3.65553	0.00119671	9.49652e-05	0.00386848	0.000342402	0	0	0	0.000722314	0	0	0.00147484	0	0	0.0145568	0	0	0	0	0	0	0	0	0	0	0	0.00123455	0	0	0	0	0
k__Bacteria; p__Cyanobacteria; c__4C0d-2; o__YS2; f__; g__; s__	960	1	0.652524	0.000337106	0.000214456	0.00126134	0.000773231	0	0	0	0	0	0	0.00471949	0	0	0	0	0	0	0	0	0.00278792	0	0	0	0	0	0	0	0	0	0	0
k__Bacteria; p__Cyanobacteria; c__4C0d-2; o__YS2; f__; g__; s__	961	0.575106	-1.0865	0.000742815	0.00157743	0.00127114	0.00461226	0	0	0.00027018	0.00180578	0	0	0.00117987	0	0.00288889	0.000309718	0	0.00394497	0	0	0	0.0167275	0.00130995	0	0	0	0	0.0024691	0	0	0	0	0
k__Bacteria; p__Cyanobacteria; c__4C0d-2; o__YS2; f__; g__; s__	962	0.000551991	7.10303	0.0130554	9.49652e-05	0.0109664	0.000342402	0.0116153	0	0.000810541	0.0357545	0.00830539	0.0165725	0.0342163	0.0171938	0.0187778	0.00464578	0.00699301	0.0138074	0.00956602	0.00451732	0	0	0	0	0	0	0	0.00123455	0	0	0	0	0
k__Bacteria; p__Cyanobacteria; c__4C0d-2; o__YS2; f__; g__; s__	963	0.00162797	5.44067	0.0261216	0.000601446	0.0372099	0.00216855	0	0.00875427	0.00297198	0.0195025	0.00544146	0.128437	0.0430653	0.0839461	0.0115556	0.0346885	0.00932401	0.00295873	0	0.0150577	0	0	0	0	0	0	0	0.0078188	0	0	0	0	0
k__Bacteria; p__Cyanobacteria; c__4C0d-2; o__YS2; f__; g__; s__	964	0.385692	#NUM!	0	0.00152435	0	0.00367176	0	0	0	0	0	0	0	0	0	0	0	0	0	0	0	0	0	0	0	0	0.00837165	0.000411516	0.0110334	0	0	0	0
k__Bacteria; p__Cyanobacteria; c__4C0d-2; o__YS2; f__; g__; s__	965	0.520786	-3.76027	1.97291e-05	0.000267339	7.38197e-05	0.00069033	0	0	0	0	0	0.000276208	0	0	0	0	0	0	0	0	0	0	0	0	0.000495173	0.000499749	0.00248049	0	0	0	0	0	0
k__Bacteria; p__Cyanobacteria; c__4C0d-2; o__YS2; f__; g__; s__	966	0.296935	1.57304	0.000659285	0.000221585	0.00127156	0.000798938	0	0	0	0.00361157	0.00343671	0.00138104	0.000294968	0.000505699	0	0	0	0	0	0	0	0	0	0	0	0	0	0.00288061	0	0	0	0	0
k__Bacteria; p__Cyanobacteria; c__4C0d-2; o__YS2; f__; g__; s__	967	0.239594	8.11507	0.00532914	1.92211e-05	0.0174926	6.93027e-05	0	0	0.00027018	0.00686198	0.00114557	0.000552416	0.0657778	0	0	0	0	0	0	0	0	0	0	0	0	0.000249874	0	0	0	0	0	0	0
k__Bacteria; p__Cyanobacteria; c__4C0d-2; o__YS2; f__; g__; s__	968	0.00502736	#DIV/0!	0.00402087	0	0.00560623	0	0	0	0.000540361	0.00433388	0.0191883	0.0035907	0.00206477	0.0136539	0.00404444	0.0034069	0.0034965	0.00197248	0	0	0	0	0	0	0	0	0	0	0	0	0	0	0
k__Bacteria; p__Cyanobacteria; c__Chloroplast; o__Streptophyta; f__; g__; s__	969	0.879697	-1.52103	0.00020689	0.000593766	0.000384442	0.0015436	0	0	0.000540361	0.00108347	0.000286393	0	0	0	0	0	0	0.000986242	0	0	0	0.00557585	0.00130995	0	0	0	0.000310061	0	0	0	0	0.000523106	0
k__Bacteria; p__Cyanobacteria; c__Chloroplast; o__Streptophyta; f__; g__; s__	970	0.632473	-0.746921	0.00813909	0.0136591	0.0138495	0.0146573	0.00387177	0.0525256	0.00108072	0.00722314	0.00257753	0.000276208	0.000884904	0.0015171	0.00115556	0.000309718	0.00699301	0.0157799	0.00318867	0.0165635	0.0340729	0.0139396	0.0406083	0.0106956	0.00247587	0.000499749	0.000930184	0	0	0.00134817	0.0195644	0.0324325	0.0210009
k__Bacteria; p__Cyanobacteria; c__Chloroplast; o__Streptophyta; f__; g__; s__	971	0.34072	-1.11889	0.0612818	0.133091	0.0905626	0.140897	0.0348459	0.332662	0.00864577	0.0617578	0.0171836	0.0033145	0.0115037	0.0171938	0.0101111	0.00464578	0.0955711	0.103555	0.00637735	0.150577	0.302725	0.158912	0.318317	0.0986369	0.0131221	0.0114942	0.00868171	0	0.0110334	0.00997649	0.244555	0.393375	0.15936
k__Bacteria; p__Cyanobacteria; c__Chloroplast; o__Streptophyta; f__; g__; s__	972	0.0787326	-1.43375	0.00271408	0.00733205	0.00450206	0.00735086	0	0	0.00378253	0.00975124	0.00171836	0.000276208	0.000589936	0.00505699	0.000288889	0.000309718	0.0011655	0	0	0.0150577	0.00655248	0	0.00654973	0	0.00470415	0.00274862	0.00527104	0.00164606	0.0110334	0.000808904	0.0228251	0.014647	0.0185302
k__Bacteria; p__Cyanobacteria; c__Chloroplast; o__Streptophyta; f__; g__; s__	973	0.786803	#NUM!	0	1.90451e-05	0	6.86682e-05	0	0	0	0	0	0	0	0	0	0	0	0	0	0	0	0	0	0	0.000247587	0	0	0	0	0	0	0	0
k__Bacteria; p__Elusimicrobia; c__Elusimicrobia; o__Elusimicrobiales; f__; g__; s__	974	0.0197237	5.64231	0.00401958	8.04778e-05	0.00541147	0.000290167	0	0	0.000540361	0.00144463	0.00830539	0.00828624	0.00560439	0.0010114	0.0184889	0.00371662	0	0.00887618	0	0	0	0	0	0	0	0	0	0	0	0	0	0.00104621	0
k__Bacteria; p__Elusimicrobia; c__Elusimicrobia; o__Elusimicrobiales; f__Elusimicrobiaceae; g__; s__	975	0.000794953	3.05407	0.0439502	0.0052917	0.0343005	0.00756359	0.0232306	0.0262628	0.00432289	0.0480339	0.0289257	0.0977776	0.0999941	0.0389388	0.101689	0.0619437	0.00815851	0.0463534	0.019132	0.0105404	0.0157259	0	0.00130995	0.00356519	0.00148552	0.0262368	0.00465092	0.00493819	0	0.00188744	0.00652146	0	0.00247069
k__Bacteria; p__Elusimicrobia; c__Elusimicrobia; o__Elusimicrobiales; f__Elusimicrobiaceae; g__; s__	976	0.198826	0.671236	0.0435832	0.0273689	0.0411912	0.0387087	0.0542047	0	0.00486325	0.0144463	0.0916456	0.0522033	0.0306767	0.0359046	0.122778	0.0380954	0.0034965	0.119335	0.00637735	0.0361386	0.0262099	0.00278792	0.00130995	0.0011884	0.00618967	0.0512243	0.0384476	0.000823032	0	0.00242671	0.0146733	0.0894511	0.121064
k__Bacteria; p__Elusimicrobia; c__Elusimicrobia; o__Elusimicrobiales; f__Elusimicrobiaceae; g__; s__	977	0.000794953	3.24011	0.0246283	0.00260653	0.0240423	0.00832155	0.0309741	0.0262628	0.00864577	0.00902892	0.00257753	0.0375643	0.0342163	0.0298363	0.0158889	0.0953932	0.011655	0.00493121	0.00318867	0.0346328	0.0301414	0	0	0	0.000495173	0.00324837	0	0	0	0	0	0	0
k__Bacteria; p__Elusimicrobia; c__Elusimicrobia; o__Elusimicrobiales; f__Elusimicrobiaceae; g__; s__	978	0.000967903	#DIV/0!	0.0127036	0	0.0156887	0	0.0116153	0.00875427	0.0013509	0.00758429	0.00171836	0.0140866	0.00943897	0.0394445	0.0153111	0.00154859	0	0.0542433	0.0127547	0	0	0	0	0	0	0	0	0	0	0	0	0	0
k__Bacteria; p__Elusimicrobia; c__Endomicrobia; o__; f__; g__; s__	979	0.000622117	3.57198	0.0482387	0.00405623	0.0345626	0.0073966	0.00387177	0.113805	0.00297198	0.0888446	0.0289257	0.0737475	0.0817061	0.0389388	0.0231111	0.0703061	0.027972	0.0562158	0.0573961	0.00752887	0.010484	0.0223034	0	0	0	0.001999	0.000310061	0.0160491	0	0.00053927	0	0.00104621	0
k__Bacteria; p__Elusimicrobia; c__Endomicrobia; o__; f__; g__; s__	980	0.00461852	3.71247	0.0114014	0.000869747	0.00975439	0.00138516	0	0.0350171	0.00027018	0.0144463	0.00343671	0.0185059	0.00619432	0.0222508	0.0078	0.0111499	0.013986	0.0138074	0.0127547	0	0	0	0	0	0.000990347	0.00124937	0	0	0	0.00377489	0.00163036	0.00366174	0
k__Bacteria; p__Elusimicrobia; c__Endomicrobia; o__; f__; g__; s__	981	0.00840891	2.54101	0.00873689	0.00150119	0.0120976	0.00541261	0.0309741	0.00875427	0.000540361	0.0195025	0.00114557	0.00220966	0.00678426	0.00505699	0.00606666	0.0377856	0.0034965	0	0	0	0	0.0195155	0	0	0	0	0	0	0	0	0	0	0
k__Bacteria; p__Elusimicrobia; c__Endomicrobia; o__; f__; g__; s__	982	0.00502736	#DIV/0!	0.00334888	0	0.0040042	0	0	0.00875427	0	0.00288925	0.000572785	0.000552416	0.00619432	0.00960829	0.000288889	0.000929155	0	0	0.00956602	0.00752887	0	0	0	0	0	0	0	0	0	0	0	0	0
k__Bacteria; p__Fibrobacteres; c__Fibrobacteria; o__Fibrobacterales; f__Fibrobacteraceae; g__Fibrobacter; s__	983	0.00502736	-4.66691	0.0179333	0.455552	0.0180767	0.666365	0.0425894	0.00875427	0.0235057	0.00180578	0.00515507	0.0632516	0.0126836	0.00707979	0.0109778	0.00433606	0.0314685	0.0108487	0	0.0286097	0.247684	0.0223034	0.877664	0.28878	0.85665	2.40254	0.310371	0.0300407	0.0838537	0.0183352	0.702687	0.0800352	0.00123535
k__Bacteria; p__Fibrobacteres; c__Fibrobacteria; o__Fibrobacterales; f__Fibrobacteraceae; g__Fibrobacter; s__succinogenes	984	0.661359	0.0058746	0.500565	0.498531	0.228983	0.467363	0.383305	0.367679	0.132118	0.166132	0.657557	0.559045	0.918235	0.597231	0.716733	0.475727	0.574592	0.397455	0.280603	0.781497	1.13227	0.64401	0.877664	0.356519	0.457788	0.242378	0.0598418	1.52137	0.485469	0.000269635	0.658667	0.0434178	0.00123535
k__Bacteria; p__Fibrobacteres; c__Fibrobacteria; o__Fibrobacterales; f__Fibrobacteraceae; g__Fibrobacter; s__succinogenes	985	0.047746	-0.483719	0.0315664	0.0441407	0.0233154	0.12135	0.0116153	0.0525256	0.00702469	0.00541735	0.0721709	0.0458505	0.0448351	0.036916	0.0254222	0.0291135	0.027972	0.00591745	0.00637735	0.0707714	0.441637	0.0780618	0.023579	0	0	0.00899548	0	0.0148146	0	0.00674087	0	0	0
k__Bacteria; p__Fibrobacteres; c__Fibrobacteria; o__Fibrobacterales; f__Fibrobacteraceae; g__Fibrobacter; s__succinogenes	986	0.051879	-1.03597	0.210579	0.43179	0.117047	0.298845	0.135512	0.113805	0.085377	0.0924562	0.361141	0.193622	0.245118	0.392423	0.329622	0.170655	0.217949	0.114404	0.0924715	0.403548	0.359076	0.345702	0.381194	0.0879413	0.368904	0.0822087	0.378895	0.242383	0.514156	0.790839	0.384766	1.22877	0.44843
k__Bacteria; p__Fibrobacteres; c__Fibrobacteria; o__Fibrobacterales; f__Fibrobacteraceae; g__Fibrobacter; s__succinogenes	987	0.103375	-1.27119	0.0429484	0.103661	0.022293	0.114609	0.0619483	0.00875427	0.0189126	0.0122793	0.0741757	0.0245825	0.0345112	0.0490528	0.0502666	0.0501744	0.0617716	0.0236698	0.0573961	0.073783	0.0170364	0.0892135	0.0799067	0.0606082	0.102253	0.0822087	0.0399979	0.173248	0.0264801	0.0167174	0.167927	0.0460333	0.44596
k__Bacteria; p__Fibrobacteres; c__Fibrobacteria; o__Fibrobacterales; f__Fibrobacteraceae; g__Fibrobacter; s__succinogenes	988	0.000514711	8.48528	0.0148657	4.14823e-05	0.01414	0.000149566	0.0309741	0	0.00459307	0.00108347	0.00171836	0.0196108	0.0188779	0.00657409	0.0442	0.00402634	0.00932401	0.036491	0.00956602	0.0210808	0	0	0	0	0	0	0	0	0	0.00053927	0	0	0
k__Bacteria; p__Fibrobacteres; c__Fibrobacteria; o__Fibrobacterales; f__Fibrobacteraceae; g__Fibrobacter; s__succinogenes	989	0.249954	0.26699	0.016474	0.0136907	0.0166381	0.0233712	0.00387177	0	0.00351235	0.000361157	0.014606	0.0243063	0.00383458	0.0197223	0.0271555	0.0157956	0.0198135	0.00394497	0.0605848	0.033127	0.00262099	0.0390309	0.00392984	0	0	0	0	0.0683116	0.00441335	0.00593197	0.0521716	0.00156932	0
k__Bacteria; p__Fibrobacteres; c__Fibrobacteria; o__Fibrobacterales; f__Fibrobacteraceae; g__Fibrobacter; s__succinogenes	990	0.0010873	1.81167	0.0294878	0.0083999	0.0194371	0.0296403	0.0154871	0.0525256	0.0132388	0.00216694	0.069307	0.0301067	0.0188779	0.0389388	0.0418889	0.0514132	0.020979	0.00493121	0.0318867	0.0210808	0	0	0	0	0.000247587	0.000249874	0.000310061	0.000823032	0	0.107045	0	0.000523106	0
k__Bacteria; p__Fibrobacteres; c__Fibrobacteria; o__Fibrobacterales; f__Fibrobacteraceae; g__Fibrobacter; s__succinogenes	991	0.879697	-0.660808	0.000534335	0.000844766	0.00114969	0.00234012	0	0	0.000810541	0	0.00286393	0	0	0	0	0.000309718	0.0034965	0	0	0	0	0.00836377	0	0	0	0	0	0.000411516	0.00220668	0	0	0	0
k__Bacteria; p__Fibrobacteres; c__Fibrobacteria; o__Fibrobacterales; f__Fibrobacteraceae; g__Fibrobacter; s__succinogenes	992	0.0787326	-2.67462	0.000580064	0.00370353	0.000874824	0.00512993	0	0	0.00108072	0	0.00315032	0	0.00117987	0.000505699	0.000288889	0.000929155	0	0.000986242	0	0	0	0	0.00785968	0.0011884	0.00123793	0.00549724	0.000930184	0.0144031	0	0.00134817	0	0.00209242	0.0135888
k__Bacteria; p__Fibrobacteres; c__Fibrobacteria; o__Fibrobacterales; f__Fibrobacteraceae; g__Fibrobacter; s__succinogenes	993	0.786803	-1.3904	0.00166314	0.00435995	0.00310816	0.0116427	0.00774353	0	0.000540361	0.00577851	0.000859178	0	0	0	0	0.0083624	0	0	0	0	0.0419359	0.00557585	0	0	0	0	0	0	0	0.00916758	0	0	0
k__Bacteria; p__Fibrobacteres; c__Fibrobacteria; o__Fibrobacterales; f__Fibrobacteraceae; g__Fibrobacter; s__succinogenes	994	0.76241	-0.849777	0.000220499	0.000397387	0.000390449	0.00111534	0	0	0	0	0.000572785	0.000828624	0.00117987	0.000505699	0	0	0	0	0	0	0.00393149	0	0	0	0	0	0	0.00123455	0	0	0	0	0
k__Bacteria; p__Fibrobacteres; c__Fibrobacteria; o__Fibrobacterales; f__Fibrobacteraceae; g__Fibrobacter; s__succinogenes	995	0.0939245	#DIV/0!	0.000545181	0	0.000905504	0	0	0	0.00027018	0	0	0	0.00117987	0.0010114	0.00288889	0.000309718	0	0.00197248	0	0	0	0	0	0	0	0	0	0	0	0	0	0	0
k__Bacteria; p__Firmicutes; c__Bacilli; o__Bacillales; f__Bacillaceae; g__; s__	996	1	#DIV/0!	0	0	0	0	0	0	0	0	0	0	0	0	0	0	0	0	0	0	0	0	0	0	0	0	0	0	0	0	0	0	0
k__Bacteria; p__Firmicutes; c__Bacilli; o__Bacillales; f__Bacillaceae; g__Bacillus; s__	997	0.45033	0.711103	0.00125233	0.000764987	0.00298377	0.00189062	0	0	0.000540361	0.000361157	0.000286393	0	0.00324465	0.000505699	0.00144444	0.0111499	0	0	0	0	0	0	0	0	0.000495173	0.000249874	0	0.00658425	0	0	0	0.00261553	0
k__Bacteria; p__Firmicutes; c__Bacilli; o__Bacillales; f__Bacillaceae; g__Bacillus; s__	998	0.948646	-1.96148	0.00188556	0.00734356	0.00282781	0.0222116	0	0	0.00027018	0	0	0.000276208	0.0073742	0.0030342	0	0.00495549	0	0.00295873	0	0.00752887	0.00393149	0.00278792	0	0.00475359	0.000495173	0.00149925	0.000930184	0.0810686	0	0	0	0	0
k__Bacteria; p__Firmicutes; c__Bacilli; o__Bacillales; f__Planococcaceae; g__; s__	999	0.148364	4.10723	0.00436447	0.000253241	0.00814931	0.000913072	0	0	0.000540361	0	0	0	0.0206477	0.00556269	0.00433333	0.0250872	0	0.00493121	0	0	0	0	0	0	0	0	0	0.00329213	0	0	0	0	0
k__Bacteria; p__Firmicutes; c__Bacilli; o__Bacillales; f__Planococcaceae; g__; s__	1000	0.16748	#DIV/0!	0.00315361	0	0.00666258	0	0	0	0	0	0	0	0.0135685	0.00556269	0.00173333	0.0222997	0	0.000986242	0	0	0	0	0	0	0	0	0	0	0	0	0	0	0
k__Bacteria; p__Firmicutes; c__Bacilli; o__Bacillales; f__Staphylococcaceae; g__Jeotgalicoccus; s__psychrophilus	1001	0.34072	1.81717	0.0013652	0.000387413	0.00194302	0.000710169	0	0	0	0.00469504	0.000572785	0.00138104	0.00117987	0	0.00288889	0.00247775	0	0.00591745	0	0	0.0013105	0	0	0.00237679	0	0.000499749	0.000310061	0	0	0.00053927	0	0	0
k__Bacteria; p__Firmicutes; c__Bacilli; o__Bacillales; f__Staphylococcaceae; g__Staphylococcus	1002	0.661359	0.648684	0.000449184	0.000286517	0.000643346	0.000503346	0	0	0	0	0	0.000828624	0.00147484	0.000505699	0.000577778	0.000929155	0	0.00197248	0	0	0	0	0	0.0011884	0	0.000249874	0.00124024	0	0	0	0	0.00104621	0
k__Bacteria; p__Firmicutes; c__Bacilli; o__Lactobacillales; f__; g__; s__	1003	0.047746	-4.6422	0.000274708	0.00685984	0.000510789	0.00940084	0	0	0	0.00108347	0	0.000276208	0.00147484	0.0010114	0	0	0	0	0	0	0	0	0.00654973	0	0.00321863	0	0.00496098	0	0.0308935	0.00296598	0.00978218	0.0209242	0.00988277
k__Bacteria; p__Firmicutes; c__Bacilli; o__Lactobacillales; f__Aerococcaceae; g__; s__	1004	0.162808	0.622963	0.000935944	0.000607743	0.00103025	0.00182462	0	0	0	0.00288925	0.000859178	0.00276208	0.00117987	0	0.00202222	0.00123887	0.0011655	0.000986242	0	0	0.00655248	0	0	0	0	0	0	0	0	0.00134817	0	0	0
k__Bacteria; p__Firmicutes; c__Bacilli; o__Lactobacillales; f__Aerococcaceae; g__Facklamia; s__	1005	0.41171	0.939757	0.000408225	0.000212816	0.000624849	0.000608223	0	0	0	0.000361157	0.000286393	0.00110483	0	0.0010114	0.00202222	0.000929155	0	0	0	0	0	0	0	0	0	0.000249874	0.000310061	0	0.00220668	0	0	0	0
k__Bacteria; p__Firmicutes; c__Bacilli; o__Lactobacillales; f__Carnobacteriaceae; g__Trichococcus; s__	1006	0.55066	0.939689	0.00079785	0.000415955	0.00131713	0.000779488	0	0	0	0.00144463	0.00143196	0.00110483	0.000884904	0.000505699	0.000866666	0	0	0.00493121	0	0	0	0	0	0	0.000247587	0.000249874	0	0	0	0.000808904	0.00163036	0	0.00247069
k__Bacteria; p__Firmicutes; c__Bacilli; o__Lactobacillales; f__Lactobacillaceae; g__; s__	1007	0.649791	-2.17999	0.00047766	0.00216453	0.000804331	0.00447595	0	0	0	0.00108347	0	0	0	0.0010114	0.000288889	0	0.002331	0.00197248	0	0	0	0	0.00261989	0.011884	0	0.000249874	0.000620122	0.000411516	0	0	0	0	0.0123535
k__Bacteria; p__Firmicutes; c__Bacilli; o__Lactobacillales; f__Lactobacillaceae; g__Lactobacillus; s__	1008	0.41171	-3.99818	0.0001203	0.00192239	0.000213628	0.00440668	0	0	0.00027018	0	0	0	0	0.000505699	0.000288889	0.000619437	0	0	0	0	0	0	0	0	0.000247587	0	0.000310061	0	0	0.00053927	0.00978218	0.000523106	0.0135888
k__Bacteria; p__Firmicutes; c__Bacilli; o__Lactobacillales; f__Lactobacillaceae; g__Lactobacillus; s__	1009	0.038126	-1.93457	0.000689907	0.00263726	0.00106945	0.00248496	0	0	0	0	0	0.00138104	0.00353961	0.0010114	0.00144444	0.000309718	0	0.00197248	0	0	0.0013105	0	0.00261989	0.00237679	0.00445656	0.00849573	0.00465092	0.000411516	0.00441335	0.00188744	0	0.00366174	0
k__Bacteria; p__Firmicutes; c__Bacilli; o__Lactobacillales; f__Lactobacillaceae; g__Lactobacillus; s__	1010	0.0164193	-1.61223	0.0073117	0.0223536	0.015073	0.0230299	0	0	0.0564677	0.0202248	0.00171836	0.0035907	0.00235974	0.0010114	0.00288889	0.000619437	0.00699301	0.00197248	0	0.00451732	0.00262099	0.00557585	0.0340586	0.0106956	0.0688291	0.017991	0.0635625	0.00946486	0.0441335	0.00808904	0	0.0156932	0.00988277
k__Bacteria; p__Firmicutes; c__Bacilli; o__Lactobacillales; f__Lactobacillaceae; g__Lactobacillus; s__	1011	0.39943	-4.48746	5.78958e-05	0.00129869	0.000216626	0.00427007	0	0	0.000810541	0	0	0	0	0	0	0	0	0	0	0	0	0	0	0	0.000247587	0.0154922	0.000620122	0	0	0	0	0.000523106	0
k__Bacteria; p__Firmicutes; c__Bacilli; o__Lactobacillales; f__Lactobacillaceae; g__Lactobacillus; s__	1012	0.649791	-1.79362	9.75582e-05	0.000338219	0.000204471	0.000664647	0	0	0.00027018	0	0	0	0.000589936	0.000505699	0	0	0	0	0	0	0	0	0	0	0.000990347	0	0.000930184	0	0.00220668	0.000269635	0	0	0
k__Bacteria; p__Firmicutes; c__Bacilli; o__Lactobacillales; f__Lactobacillaceae; g__Lactobacillus; s__	1013	0.00542789	-2.49608	0.00359842	0.0203005	0.00932491	0.0147625	0	0	0.0348533	0.00939008	0	0.00165725	0	0.0015171	0.000288889	0	0.0011655	0	0	0.00150577	0.0248994	0	0.0523979	0.0356519	0.0274821	0.0117441	0.0198439	0.000411516	0.0286868	0.0132121	0.00489109	0.0261553	0.0185302
k__Bacteria; p__Firmicutes; c__Bacilli; o__Lactobacillales; f__Lactobacillaceae; g__Lactobacillus; s__	1014	0.22369	-2.50755	0.000166395	0.00094621	0.000436981	0.00189685	0	0	0	0.00144463	0	0	0.000884904	0	0	0	0	0	0	0	0	0	0	0	0.000247587	0.000249874	0.000620122	0	0.00662003	0	0	0.00209242	0.00247069
k__Bacteria; p__Firmicutes; c__Bacilli; o__Lactobacillales; f__Lactobacillaceae; g__Lactobacillus; s__	1015	0.00575111	-3.0449	0.0014363	0.0118537	0.00236618	0.00949038	0	0	0.00837559	0.00361157	0	0	0.000589936	0.000505699	0	0	0.002331	0	0.00318867	0.00150577	0.0196574	0	0.0275089	0.0166376	0.00693243	0.00849573	0.00992196	0	0.0286868	0.0062016	0.00163036	0.0136007	0.0148241
k__Bacteria; p__Firmicutes; c__Bacilli; o__Lactobacillales; f__Lactobacillaceae; g__Lactobacillus; s__	1016	0.00461852	-4.95125	0.00150884	0.0466786	0.00192155	0.0734369	0	0	0.00027018	0.00144463	0.00171836	0.00718141	0.00294968	0.0030342	0.00144444	0.000929155	0.0011655	0.000986242	0	0	0.0117945	0	0.0157194	0.0190143	0.0881408	0.000749623	0.128985	0.00164606	0.255975	0.00970685	0.00978218	0.0282477	0.0370604
k__Bacteria; p__Firmicutes; c__Bacilli; o__Lactobacillales; f__Lactobacillaceae; g__Lactobacillus; s__brevis	1017	0.0222458	-1.54418	0.0006305	0.00183878	0.00206753	0.00269255	0.00774353	0	0	0.00108347	0	0	0	0	0	0	0	0	0	0	0.00917347	0	0.00261989	0.00356519	0.000247587	0.000749623	0.000310061	0.00123455	0	0.00053927	0	0.000523106	0.00494138
k__Bacteria; p__Firmicutes; c__Bacilli; o__Lactobacillales; f__Lactobacillaceae; g__Lactobacillus; s__brevis	1018	0.378476	-1.88642	0.000530436	0.00196111	0.0013078	0.00418639	0	0	0	0	0	0	0	0	0.000577778	0	0.002331	0	0	0.00451732	0	0	0	0	0	0.000749623	0.000310061	0	0.00220668	0.000269635	0	0.00836969	0.0135888
k__Bacteria; p__Firmicutes; c__Bacilli; o__Lactobacillales; f__Lactobacillaceae; g__Lactobacillus; s__mucosae	1019	0.600367	-0.669411	0.0046217	0.00735046	0.00519882	0.00742083	0	0	0.0183723	0.011557	0.00257753	0.00165725	0.00796413	0.0030342	0.00346667	0.000619437	0.00699301	0.00394497	0	0.00451732	0.00262099	0	0	0.0106956	0.015598	0.0097451	0.0195339	0.00205758	0.0198601	0.00916758	0	0.00627727	0
k__Bacteria; p__Firmicutes; c__Bacilli; o__Lactobacillales; f__Lactobacillaceae; g__Pediococcus; s__	1020	0.846161	-0.92918	0.000814742	0.00155143	0.00146151	0.00273491	0	0	0.00027018	0.00144463	0.000286393	0	0.000294968	0.00353989	0.000288889	0.000619437	0.004662	0	0	0	0	0	0.00130995	0	0	0	0	0	0.00441335	0.00053927	0.00815182	0.00575416	0
k__Bacteria; p__Firmicutes; c__Bacilli; o__Lactobacillales; f__Leuconostocaceae; g__; s__	1021	0.0010873	#NUM!	0	0.00899311	0	0.0098337	0	0	0	0	0	0	0	0	0	0	0	0	0	0	0	0	0.0104796	0.0106956	0.00123793	0.00924535	0.00217043	0.00370364	0.0242735	0.00107854	0.0309769	0.00575416	0.0172948
k__Bacteria; p__Firmicutes; c__Bacilli; o__Lactobacillales; f__Streptococcaceae; g__Streptococcus; s__	1022	0.463699	-0.635167	0.0129107	0.0200518	0.0131505	0.0366612	0.0154871	0	0.0110774	0.0151686	0.00257753	0.0110483	0.0203528	0.0530984	0.0164667	0.00960127	0.0034965	0.0118349	0	0.0105404	0.0117945	0.00557585	0.0209591	0.0867529	0.000247587	0.00174912	0.000620122	0.114401	0.00220668	0.00485343	0.00163036	0	0.00988277
k__Bacteria; p__Firmicutes; c__Bacilli; o__Lactobacillales; f__Streptococcaceae; g__Streptococcus; s__	1023	0.296935	-1.94631	0.000139722	0.000538471	0.000361194	0.000779105	0	0	0.000810541	0	0.00114557	0	0	0	0	0	0	0	0	0	0	0	0.00130995	0.00237679	0	0.000999498	0	0	0	0.00107854	0	0	0.00123535
k__Bacteria; p__Firmicutes; c__Bacilli; o__Turicibacterales; f__Turicibacteraceae; g__Turicibacter; s__	1024	0.000514711	4.29443	0.0197878	0.00100843	0.0127743	0.00159685	0.0348459	0.0350171	0.000540361	0.0465892	0.0077326	0.0287256	0.0141585	0.0106197	0.0251333	0.0164151	0.00699301	0.0177524	0.0159434	0.0165635	0.0013105	0.00557585	0	0	0.000495173	0.00174912	0.00124024	0.0024691	0	0.000269635	0	0	0
k__Bacteria; p__Firmicutes; c__Bacilli; o__Turicibacterales; f__Turicibacteraceae; g__Turicibacter; s__	1025	0.000514711	3.8084	0.00923793	0.000659375	0.00572442	0.00101735	0.00774353	0.00875427	0.00027018	0.0202248	0.00429589	0.014639	0.00766916	0.00809119	0.0158889	0.0083624	0.002331	0.00493121	0.00956602	0.0165635	0	0	0	0.0011884	0.000495173	0.000499749	0.000620122	0.00329213	0.00220668	0.000269635	0	0	0
k__Bacteria; p__Firmicutes; c__Clostridia; o__Clostridiales	1026	0.463699	-1.09603	0.0241713	0.0516699	0.0442094	0.0801597	0.0232306	0	0.00108072	0.00325041	0.000286393	0.118217	0.00648929	0.00859689	0.0109778	0	0	0.133143	0	0.033127	0.107461	0.00836377	0.0117895	0.280462	0	0.0129935	0.0443387	0	0.061787	0	0.122277	0	0.0222362
k__Bacteria; p__Firmicutes; c__Clostridia; o__Clostridiales	1027	0.931591	-0.834092	0.000123618	0.000220378	0.000316769	0.000543969	0	0	0.00027018	0	0	0	0.000294968	0	0	0	0.0011655	0	0	0	0	0	0	0	0	0	0	0.00123455	0	0	0.00163036	0	0
k__Bacteria; p__Firmicutes; c__Clostridia; o__Clostridiales	1028	0.125016	0.258551	0.00112685	0.000941968	0.00413387	0.000995392	0.0154871	0	0	0	0	0	0	0	0.000288889	0	0	0	0	0	0	0	0.00130995	0.0011884	0.00148552	0.00224887	0.00124024	0	0	0.00215708	0	0.00261553	0
k__Bacteria; p__Firmicutes; c__Clostridia; o__Clostridiales	1029	0.0341146	#NUM!	0	0.00389804	0	0.00525333	0	0	0	0	0	0	0	0	0	0	0	0	0	0	0.00917347	0	0.0104796	0.00950717	0.00495173	0.0147426	0.00155031	0	0	0.000269635	0	0	0
k__Bacteria; p__Firmicutes; c__Clostridia; o__Clostridiales	1030	0.0010873	8.20216	0.00566075	1.92211e-05	0.00503171	6.93027e-05	0	0.00875427	0.00027018	0.00361157	0.00257753	0.00441933	0.00678426	0.0161824	0.0153111	0.00588465	0.00699301	0.00394497	0	0.00451732	0	0	0	0	0	0.000249874	0	0	0	0	0	0	0
k__Bacteria; p__Firmicutes; c__Clostridia; o__Clostridiales	1031	0.00575111	2.85729	0.00397631	0.000548721	0.00459364	0.0015533	0.00774353	0	0.00027018	0.00469504	0.00315032	0.000828624	0.00265471	0	0.0026	0.00309718	0.002331	0.0108487	0.0159434	0.00150577	0	0.00557585	0.00130995	0	0.000247587	0	0	0	0	0	0	0	0
k__Bacteria; p__Firmicutes; c__Clostridia; o__Clostridiales	1032	0.508559	0.598595	0.000449094	0.00029658	0.000818535	0.000777294	0	0	0	0.000361157	0	0.00138104	0.00117987	0	0.000577778	0.00278747	0	0	0	0	0.00262099	0	0	0	0	0	0	0.00123455	0	0	0	0	0
k__Bacteria; p__Firmicutes; c__Clostridia; o__Clostridiales	1033	0.330922	3.20821	0.000353659	3.82662e-05	0.000857739	9.34079e-05	0	0	0.00324217	0	0.000572785	0.000552416	0.000294968	0	0.000288889	0	0	0	0	0	0	0	0	0	0.000247587	0.000249874	0	0	0	0	0	0	0
k__Bacteria; p__Firmicutes; c__Clostridia; o__Clostridiales	1034	0.00221618	#DIV/0!	0.00638438	0	0.00734976	0	0.00774353	0.0175085	0	0.0198636	0.000286393	0.0140866	0.0082591	0	0.00115556	0.000309718	0.0011655	0.00394497	0	0.0150577	0	0	0	0	0	0	0	0	0	0	0	0	0
k__Bacteria; p__Firmicutes; c__Clostridia; o__Clostridiales	1035	0.16748	#DIV/0!	0.000606587	0	0.00120381	0	0	0	0	0	0	0.00138104	0.00147484	0.0010114	0.000288889	0.00433606	0	0	0	0	0	0	0	0	0	0	0	0	0	0	0	0	0
k__Bacteria; p__Firmicutes; c__Clostridia; o__Clostridiales; f__; g__; s__	1036	0.125016	1.25769	0.00237548	0.000993456	0.0030135	0.00167962	0.00774353	0	0.000810541	0.000361157	0.000286393	0.000828624	0.00147484	0.0010114	0.00144444	0.00526521	0	0.00295873	0.00956602	0.00150577	0.0013105	0.00278792	0	0	0	0	0.00155031	0.00576122	0	0.000269635	0	0	0.00123535
k__Bacteria; p__Firmicutes; c__Clostridia; o__Clostridiales; f__; g__; s__	1037	0.632473	-0.413254	0.00138613	0.00184589	0.00181233	0.00195086	0	0	0.00108072	0.00180578	0	0.000276208	0	0	0.00173333	0.00154859	0.00582751	0.00394497	0.00318867	0	0	0	0	0.00356519	0.00074276	0.00299849	0.00155031	0.00617274	0	0.00323562	0.00326073	0	0.00247069
k__Bacteria; p__Firmicutes; c__Clostridia; o__Clostridiales; f__; g__; s__	1038	0.0145849	1.77219	0.00398698	0.00116724	0.0037941	0.00385276	0.0116153	0	0.00216144	0.0104735	0.0037231	0.00441933	0.00412955	0	0.00317778	0.00898183	0.0011655	0.00295873	0	0.00301155	0	0.0139396	0	0	0	0	0	0.00123455	0	0	0	0	0
k__Bacteria; p__Firmicutes; c__Clostridia; o__Clostridiales; f__; g__; s__	1039	0.000794953	2.71264	0.0383202	0.00584577	0.0202019	0.0103811	0.0774353	0.0262628	0.0310708	0.0220306	0.0126013	0.0615944	0.0351012	0.0293306	0.0176222	0.0164151	0.0384615	0.0512846	0.0510188	0.0662541	0.00524198	0.036243	0.00261989	0.00356519	0	0.000249874	0.00124024	0.0181067	0.00220668	0	0.00652146	0	0
k__Bacteria; p__Firmicutes; c__Clostridia; o__Clostridiales; f__; g__; s__	1040	0.591868	-0.957738	0.000302352	0.000587246	0.00056898	0.00148356	0	0	0.00027018	0	0	0.000828624	0.000294968	0	0.000866666	0	0	0.00197248	0	0	0	0	0	0.00475359	0	0	0	0.00288061	0	0	0	0	0
k__Bacteria; p__Firmicutes; c__Clostridia; o__Clostridiales; f__; g__; s__	1041	0.846161	-4.37737	0.000123823	0.00257347	0.00038787	0.00927877	0	0	0	0.00144463	0	0	0	0	0.000288889	0	0	0	0	0	0	0.0334551	0	0	0	0	0	0	0	0	0	0	0
k__Bacteria; p__Firmicutes; c__Clostridia; o__Clostridiales; f__; g__; s__	1042	0.696815	-0.205442	0.000213445	0.000246111	0.000431976	0.000772142	0	0	0	0	0	0	0.000294968	0	0.000288889	0.00123887	0.0011655	0	0	0	0	0.00278792	0	0	0	0	0	0.000411516	0	0	0	0	0
k__Bacteria; p__Firmicutes; c__Clostridia; o__Clostridiales; f__; g__; s__	1043	0.0428566	1.69563	0.00679275	0.00209705	0.00801448	0.0038701	0	0.0262628	0.00189126	0.00433388	0.000572785	0.00580037	0.00294968	0.00707979	0.0052	0.00929155	0	0.00788994	0.0223207	0.00150577	0.0013105	0	0	0.00831878	0	0	0	0.0111109	0	0	0.00652146	0	0
k__Bacteria; p__Firmicutes; c__Clostridia; o__Clostridiales; f__; g__; s__	1044	0.0135798	3.82111	0.00223709	0.000158275	0.00340182	0.00057067	0	0	0.00108072	0.00469504	0.000859178	0.00165725	0.00206477	0.00455129	0.00115556	0.000929155	0.0128205	0	0	0.00150577	0	0	0	0	0	0	0	0.00205758	0	0	0	0	0
k__Bacteria; p__Firmicutes; c__Clostridia; o__Clostridiales; f__; g__; s__	1045	0.0240997	2.15337	0.00210674	0.000473568	0.00256316	0.000937528	0	0	0.000540361	0.0025281	0.00171836	0.00248587	0.00501445	0.0015171	0.000577778	0.00154859	0	0.000986242	0.00956602	0.00301155	0.0013105	0	0	0.00237679	0	0	0	0.0024691	0	0	0	0	0
k__Bacteria; p__Firmicutes; c__Clostridia; o__Clostridiales; f__; g__; s__	1046	0.00047227	5.10341	0.0767372	0.00223217	0.0462101	0.00423954	0.00387177	0.0787884	0.0189126	0.0411719	0.0420997	0.0549654	0.0474898	0.166881	0.0716444	0.102826	0.132867	0.0917205	0.130736	0.0903465	0	0.0111517	0	0	0	0.000249874	0	0.00946486	0	0	0.00815182	0	0
k__Bacteria; p__Firmicutes; c__Clostridia; o__Clostridiales; f__; g__; s__	1047	0.00139711	2.36721	0.0121868	0.00236205	0.00761776	0.00546565	0.0154871	0.0262628	0.00243162	0.00577851	0.00458228	0.021268	0.00383458	0.0166881	0.0106889	0.00743324	0.00699301	0.0226836	0.0159434	0.0105404	0.00393149	0.0195155	0	0.0011884	0	0	0.000310061	0.00576122	0	0	0	0	0
k__Bacteria; p__Firmicutes; c__Clostridia; o__Clostridiales; f__; g__; s__	1048	0.010264	2.16182	0.0159209	0.00355791	0.0207495	0.012342	0.00774353	0.0612799	0	0.0245587	0.00343671	0.00414312	0.0153383	0.0030342	0.00433333	0.056059	0	0.00788994	0.0350754	0	0	0.0446068	0	0	0	0	0	0.00164606	0	0	0	0	0
k__Bacteria; p__Firmicutes; c__Clostridia; o__Clostridiales; f__; g__; s__	1049	0.0939245	#DIV/0!	0.000268641	0	0.000391197	0	0	0	0.000810541	0	0.000286393	0.000552416	0.000294968	0	0.000577778	0.00123887	0	0	0	0	0	0	0	0	0	0	0	0	0	0	0	0	0
k__Bacteria; p__Firmicutes; c__Clostridia; o__Clostridiales; f__; g__; s__	1050	0.0614995	-5.66186	0.000103719	0.00525107	0.000214567	0.0131677	0	0	0	0	0	0.000552416	0.000589936	0	0	0.000309718	0	0	0	0	0	0.00557585	0.00392984	0.00475359	0.000247587	0.00324837	0.00155031	0.000411516	0.0485469	0	0	0	0
k__Bacteria; p__Firmicutes; c__Clostridia; o__Clostridiales; f__; g__; s__	1051	0.2764	0.950392	0.00130382	0.000674717	0.00132021	0.000942498	0	0	0.000810541	0.000722314	0.0037231	0.00138104	0.00235974	0.00353989	0.00173333	0.00247775	0	0	0	0.00150577	0.0013105	0	0	0	0.00123793	0.00124937	0.000620122	0.000823032	0	0.000269635	0.00326073	0	0
k__Bacteria; p__Firmicutes; c__Clostridia; o__Clostridiales; f__; g__; s__	1052	0.000458554	6.18694	0.0193177	0.000265156	0.015113	0.000768611	0.0232306	0.0175085	0.0102669	0.0130016	0.00171836	0.0298305	0.0253672	0.0166881	0.0410222	0.0569882	0.00815851	0.00788994	0.0127547	0.0060231	0	0.00278792	0	0	0.000247587	0	0	0.000411516	0	0	0	0	0
k__Bacteria; p__Firmicutes; c__Clostridia; o__Clostridiales; f__; g__; s__	1053	0.000898693	2.90243	0.0177804	0.00237806	0.0101429	0.00850009	0.0232306	0.00875427	0.000810541	0.0325041	0.00945096	0.0182297	0.0126836	0.0262964	0.0144444	0.0083624	0.0244755	0.0345185	0.00956602	0.0255982	0	0.0306671	0	0	0.000247587	0	0	0	0	0	0	0	0
k__Bacteria; p__Firmicutes; c__Clostridia; o__Clostridiales; f__; g__; s__	1054	0.0341146	2.55021	0.00325385	0.000555531	0.00669571	0.00157553	0	0	0.000540361	0.000722314	0	0.00220966	0.00117987	0.0025285	0.00231111	0.00185831	0.0011655	0	0.0255094	0.00752887	0	0.00557585	0	0	0	0	0	0.00164606	0	0	0	0	0
k__Bacteria; p__Firmicutes; c__Clostridia; o__Clostridiales; f__; g__; s__	1055	0.2764	#DIV/0!	0.00104462	0	0.00294289	0	0	0	0	0	0	0.00110483	0	0.0111254	0.00115556	0.00123887	0	0	0	0	0	0	0	0	0	0	0	0	0	0	0	0	0
k__Bacteria; p__Firmicutes; c__Clostridia; o__Clostridiales; f__; g__; s__	1056	0.00461852	4.09825	0.00734621	0.000428911	0.0095685	0.00154646	0	0	0.00027018	0	0.00143196	0.00994349	0.00235974	0.0182052	0.00664444	0.00371662	0.00582751	0.0345185	0.00637735	0.013552	0	0.00557585	0	0	0	0	0	0	0	0	0	0	0
k__Bacteria; p__Firmicutes; c__Clostridia; o__Clostridiales; f__; g__; s__	1057	0.011125	#DIV/0!	0.00179744	0	0.00259396	0	0	0	0	0	0.000286393	0.00193346	0.000884904	0.0025285	0.000866666	0.00464578	0.00932401	0	0.00318867	0.00150577	0	0	0	0	0	0	0	0	0	0	0	0	0
k__Bacteria; p__Firmicutes; c__Clostridia; o__Clostridiales; f__; g__; s__	1058	0.00047227	4.54099	0.0477756	0.00205226	0.036595	0.00554993	0.00774353	0.0350171	0.0262075	0.0108347	0.0077326	0.107721	0.0250723	0.0439958	0.0242667	0.051723	0.0839161	0.12328	0.0701508	0.0511963	0	0.0195155	0	0	0	0	0.000310061	0.00658425	0	0.000269635	0	0	0
k__Bacteria; p__Firmicutes; c__Clostridia; o__Clostridiales; f__; g__; s__	1059	0.239594	#NUM!	0	0.000617911	0	0.00155307	0	0	0	0	0	0	0	0	0	0	0	0	0	0	0	0.00557585	0	0	0.000495173	0	0.00155031	0.000411516	0	0	0	0	0
k__Bacteria; p__Firmicutes; c__Clostridia; o__Clostridiales; f__; g__; s__	1060	0.00123317	-8.21927	2.06349e-05	0.00614963	7.72088e-05	0.00624947	0	0	0	0	0	0	0	0	0.000288889	0	0	0	0	0	0.013105	0	0.0157194	0	0.00618967	0.00774611	0.000930184	0.000411516	0.0132401	0.00404452	0.00163036	0.0156932	0.00123535
k__Bacteria; p__Firmicutes; c__Clostridia; o__Clostridiales; f__; g__; s__	1061	0.385692	#NUM!	0	0.000311914	0	0.000647783	0	0	0	0	0	0	0	0	0	0	0	0	0	0	0	0	0	0.0011884	0	0	0	0.00205758	0	0.000808904	0	0	0
k__Bacteria; p__Firmicutes; c__Clostridia; o__Clostridiales; f__; g__; s__	1062	0.000514711	5.42828	0.0120484	0.000279804	0.0111203	0.000622872	0.0232306	0.0262628	0.000540361	0.0281702	0.0315032	0.00607658	0.0141585	0.0015171	0.00202222	0.00588465	0.004662	0.0167661	0.00637735	0.00150577	0	0	0	0	0	0.000749623	0	0.000411516	0.00220668	0.000269635	0	0	0
k__Bacteria; p__Firmicutes; c__Clostridia; o__Clostridiales; f__; g__; s__	1063	1	-0.0302886	0.000486718	0.000497045	0.000858303	0.00110649	0	0	0	0.000722314	0.00200475	0	0.00206477	0	0.00202222	0	0	0	0	0	0.00393149	0	0	0.0011884	0	0	0.000930184	0.000411516	0	0	0	0	0
k__Bacteria; p__Firmicutes; c__Clostridia; o__Clostridiales; f__; g__; s__	1064	0.0153234	-6.14757	0.000418646	0.029679	0.00126955	0.0542547	0	0	0	0	0	0.00469554	0	0	0	0	0.0011655	0	0	0	0.00786297	0.0195155	0	0	0.188413	0.00624686	0.000310061	0.0181067	0	0.0617464	0	0.00209242	0.0815328
k__Bacteria; p__Firmicutes; c__Clostridia; o__Clostridiales; f__; g__; s__	1065	0.010871	-3.16298	0.0005875	0.00526209	0.000756808	0.00631606	0	0	0.0013509	0.000722314	0.000286393	0.00248587	0	0	0.000577778	0.000309718	0	0.000986242	0	0.00150577	0.0013105	0.00557585	0	0.00475359	0.000495173	0.00624686	0.00465092	0.0209873	0.00220668	0.00350525	0	0.00261553	0.0160595
k__Bacteria; p__Firmicutes; c__Clostridia; o__Clostridiales; f__; g__; s__	1066	0.378476	-0.549443	0.00290196	0.00424708	0.00360748	0.0108249	0	0	0	0.00108347	0	0.00386691	0.000589936	0.00910259	0.00173333	0.00123887	0	0.00591745	0.00956602	0.00752887	0	0.0390309	0.00392984	0	0	0	0	0.0024691	0	0	0.00978218	0	0
k__Bacteria; p__Firmicutes; c__Clostridia; o__Clostridiales; f__; g__; s__	1067	0.0428566	-0.133275	0.00203867	0.00223597	0.00265288	0.00771184	0	0	0.00027018	0.000722314	0.000286393	0.00414312	0	0.00657409	0.00144444	0.000309718	0.002331	0.00493121	0	0.00752887	0	0.0278792	0	0.0011884	0	0	0	0	0	0	0	0	0
k__Bacteria; p__Firmicutes; c__Clostridia; o__Clostridiales; f__; g__; s__	1068	0.0341146	#NUM!	0	0.00219336	0	0.00258381	0	0	0	0	0	0	0	0	0	0	0	0	0	0	0.00655248	0	0	0.00237679	0.00198069	0.00574711	0.00651128	0	0.00220668	0	0	0.00313863	0
k__Bacteria; p__Firmicutes; c__Clostridia; o__Clostridiales; f__; g__; s__	1069	0.010264	2.72768	0.00267861	0.000404386	0.0023847	0.000989237	0	0	0.00027018	0.000722314	0.00143196	0.00469554	0.00265471	0.00505699	0.00462222	0.00433606	0.00582751	0	0.00637735	0.00150577	0	0.00278792	0	0	0	0	0	0.0024691	0	0	0	0	0
k__Bacteria; p__Firmicutes; c__Clostridia; o__Clostridiales; f__; g__; s__	1070	0.0236909	5.44306	0.0033879	7.78765e-05	0.00535789	0.00021322	0	0	0.00297198	0.00722314	0.00143196	0.00635278	0.00265471	0.0197223	0.00577778	0.000309718	0	0.000986242	0	0	0	0	0	0	0.00074276	0	0	0	0	0.000269635	0	0	0
k__Bacteria; p__Firmicutes; c__Clostridia; o__Clostridiales; f__; g__; s__	1071	0.898961	-0.27839	0.00892119	0.01082	0.00902119	0.0136593	0.0348459	0	0.0013509	0.000361157	0.00458228	0.00718141	0.00707923	0.0015171	0.0078	0.0133179	0.013986	0.0157799	0.00956602	0.00752887	0.00655248	0.00836377	0.0196492	0.0522894	0.00965588	0.00449774	0.0148829	0.00411516	0.00882671	0.000808904	0.00978218	0	0.00123535
k__Bacteria; p__Firmicutes; c__Clostridia; o__Clostridiales; f__; g__; s__	1072	0.00105731	5.39917	0.0251771	0.000596616	0.0240903	0.0018126	0.00387177	0.0175085	0.00027018	0.0801768	0.00114557	0.0541368	0.0486697	0.030342	0.00375555	0.0229192	0	0.0404359	0.019132	0.0301155	0	0	0	0	0	0	0	0.00123455	0	0	0.00652146	0	0
k__Bacteria; p__Firmicutes; c__Clostridia; o__Clostridiales; f__; g__; s__	1073	0.16748	1.45836	0.00320754	0.00116724	0.00572508	0.00385276	0.0154871	0	0.000810541	0.00397273	0.0171836	0.00248587	0.00265471	0	0.00231111	0	0	0	0	0	0	0.0139396	0	0	0	0	0	0.00123455	0	0	0	0	0
k__Bacteria; p__Firmicutes; c__Clostridia; o__Clostridiales; f__; g__; s__	1074	1	#DIV/0!	0	0	0	0	0	0	0	0	0	0	0	0	0	0	0	0	0	0	0	0	0	0	0	0	0	0	0	0	0	0	0
k__Bacteria; p__Firmicutes; c__Clostridia; o__Clostridiales; f__; g__; s__	1075	0.520786	-5.67333	8.32501e-05	0.00424842	0.000311493	0.0116229	0	0	0	0	0	0	0	0	0	0	0.0011655	0	0	0	0	0.00836377	0	0	0	0	0	0.0419746	0	0	0.00489109	0	0
k__Bacteria; p__Firmicutes; c__Clostridia; o__Clostridiales; f__; g__; s__	1076	0.00502736	-6.95254	0.00126371	0.15652	0.00335636	0.298472	0	0	0.00162108	0	0.00143196	0	0.000294968	0.0010114	0.000577778	0	0	0	0.0127547	0	0.0825612	0.111517	0.123135	0.0617966	0.000495173	0.035732	0.449899	0.0288061	1.06803	0	0.00978218	0	0.0630026
k__Bacteria; p__Firmicutes; c__Clostridia; o__Clostridiales; f__; g__; s__	1077	0.000666541	6.5581	0.0131088	0.000139117	0.0110113	0.000358846	0.0116153	0.0175085	0.00459307	0.00794545	0.000286393	0.0196108	0.0194679	0.0030342	0.0121333	0.0402634	0.0198135	0.00493121	0.0223207	0	0	0	0	0.0011884	0	0	0.000620122	0	0	0	0	0	0
k__Bacteria; p__Firmicutes; c__Clostridia; o__Clostridiales; f__; g__; s__	1078	0.0173895	4.23519	0.0029808	0.000158275	0.00308058	0.00057067	0	0	0.000810541	0.00397273	0.0037231	0.00994349	0.00619432	0.00505699	0.0026	0.0034069	0	0	0	0.0060231	0	0	0	0	0	0	0	0.00205758	0	0	0	0	0
k__Bacteria; p__Firmicutes; c__Clostridia; o__Clostridiales; f__; g__; s__	1079	0.000514711	3.82568	0.0312182	0.00220173	0.0190007	0.00691519	0.0154871	0.0612799	0.00756505	0.0303372	0.0128877	0.0215442	0.0168132	0.0197223	0.0465111	0.0449092	0.0431235	0.0256423	0.0701508	0.0210808	0	0.0250913	0.00261989	0	0	0.000499749	0	0.000411516	0	0	0	0	0
k__Bacteria; p__Firmicutes; c__Clostridia; o__Clostridiales; f__; g__; s__	1080	0.000514711	11.4901	0.0596625	2.07411e-05	0.0905802	7.47832e-05	0.0735636	0.0350171	0.00162108	0.352489	0.0584241	0.0566226	0.00117987	0.0020228	0.0416	0.0263261	0.114219	0.0147936	0.0573961	0	0	0	0	0	0	0	0	0	0	0.000269635	0	0	0
k__Bacteria; p__Firmicutes; c__Clostridia; o__Clostridiales; f__; g__; s__	1081	0.385692	#NUM!	0	0.00102985	0	0.00270209	0	0	0	0	0	0	0	0	0	0	0	0	0	0	0	0	0	0.00950717	0	0	0.000620122	0	0	0	0.00326073	0	0
k__Bacteria; p__Firmicutes; c__Clostridia; o__Clostridiales; f__; g__; s__	1082	0.000702657	5.06314	0.00716957	0.000214456	0.00688478	0.000773231	0.0154871	0	0.0013509	0.00469504	0.00200475	0.00220966	0.00294968	0.00960829	0.00751111	0.00588465	0.00815851	0.00295873	0.0255094	0.0120462	0	0.00278792	0	0	0	0	0	0	0	0	0	0	0
k__Bacteria; p__Firmicutes; c__Clostridia; o__Clostridiales; f__; g__; s__	1083	0.786803	-1.12456	0.00047814	0.00104251	0.000988384	0.00243463	0	0	0	0.000361157	0.0037231	0.000828624	0.000294968	0	0.000866666	0.000619437	0	0	0	0	0	0.00836377	0	0	0	0.000249874	0	0.00370364	0	0	0	0	0.00123535
k__Bacteria; p__Firmicutes; c__Clostridia; o__Clostridiales; f__; g__; s__	1084	0.786803	#NUM!	0	0.000352599	0	0.00127132	0	0	0	0	0	0	0	0	0	0	0	0	0	0	0	0	0	0	0	0	0	0	0	0.00458379	0	0	0
k__Bacteria; p__Firmicutes; c__Clostridia; o__Clostridiales; f__; g__; s__	1085	0.798659	0.444225	0.000967998	0.000711458	0.00362192	0.00230013	0	0	0	0	0	0	0	0	0	0	0	0	0	0.013552	0	0	0	0.00831878	0	0	0.000930184	0	0	0	0	0	0
k__Bacteria; p__Firmicutes; c__Clostridia; o__Clostridiales; f__; g__; s__	1086	0.000514711	2.92232	0.0381691	0.00503507	0.0253324	0.00608604	0.0154871	0.0350171	0.00756505	0.0216694	0.0131741	0.0729189	0.0321515	0.0227565	0.0849333	0.0662797	0.0594406	0.0335322	0.0573961	0.0120462	0	0.0195155	0	0	0.00321863	0.00149925	0.00589116	0.0123455	0	0.011055	0	0.00575416	0.00617673
k__Bacteria; p__Firmicutes; c__Clostridia; o__Clostridiales; f__; g__; s__	1087	0.0271866	-2.84991	0.000507416	0.00365823	0.00161343	0.00485225	0	0	0.00108072	0	0	0	0	0	0	0	0	0	0	0.0060231	0.00262099	0	0	0	0.00247587	0.00899548	0.00341067	0.00288061	0.0110334	0.000269635	0	0.00104621	0.0148241
k__Bacteria; p__Firmicutes; c__Clostridia; o__Clostridiales; f__; g__; s__	1088	0.0712928	#NUM!	0	0.00193817	0	0.0023844	0	0	0	0	0	0	0	0	0	0	0	0	0	0	0.00393149	0	0	0	0.00272345	0.00574711	0.00217043	0	0	0.0053927	0	0.00523106	0
k__Bacteria; p__Firmicutes; c__Clostridia; o__Clostridiales; f__; g__; s__	1089	0.038126	-4.25559	0.000434388	0.00829732	0.0011513	0.0104655	0.00387177	0	0	0	0	0.00220966	0	0	0	0	0	0	0	0	0.00524198	0	0	0	0.0242635	0.0107446	0.000310061	0	0.0154467	0.0183352	0	0.029817	0.00370604
k__Bacteria; p__Firmicutes; c__Clostridia; o__Clostridiales; f__; g__; s__	1090	0.520786	-3.43832	8.32501e-05	0.000902449	0.000311493	0.00233303	0	0	0	0	0	0	0	0	0	0	0.0011655	0	0	0	0.0013105	0.00836377	0	0	0	0	0	0.00205758	0	0	0	0	0
k__Bacteria; p__Firmicutes; c__Clostridia; o__Clostridiales; f__; g__; s__	1091	0.385692	5.27809	0.000745834	1.92211e-05	0.00132834	6.93027e-05	0	0	0	0.00361157	0	0.00248587	0	0	0.00115556	0	0	0	0.00318867	0	0	0	0	0	0	0.000249874	0	0	0	0	0	0	0
k__Bacteria; p__Firmicutes; c__Clostridia; o__Clostridiales; f__; g__; s__	1092	0.0939245	#DIV/0!	0.00186208	0	0.00347515	0	0	0	0	0	0	0.00165725	0	0.0020228	0.00346667	0	0.004662	0	0.0127547	0.00150577	0	0	0	0	0	0	0	0	0	0	0	0	0
k__Bacteria; p__Firmicutes; c__Clostridia; o__Clostridiales; f__; g__; s__	1093	0.00123317	3.09437	0.23322	0.0273065	0.167034	0.0351608	0.0696918	0.245119	0.360151	0.165771	0.490877	0.296095	0.0241874	0.283697	0.0413111	0.158266	0.167832	0.489176	0.0286981	0.444204	0.0262099	0.0557585	0.00654973	0.0879413	0.000495173	0.000499749	0.0220143	0.101644	0	0.000808904	0.0456502	0	0.00741207
k__Bacteria; p__Firmicutes; c__Clostridia; o__Clostridiales; f__; g__; s__	1094	0.00221618	#DIV/0!	0.00460116	0	0.00485055	0	0	0.00875427	0.000540361	0.00180578	0	0.00386691	0.0082591	0.015171	0.00115556	0.00867211	0.002331	0.0108487	0	0.00301155	0	0	0	0	0	0	0	0	0	0	0	0	0
k__Bacteria; p__Firmicutes; c__Clostridia; o__Clostridiales; f__; g__; s__	1095	0.000458554	8.04912	0.0269508	0.000101752	0.0191615	0.000256991	0.0309741	0.0437713	0.00405271	0.0202248	0.00114557	0.0273446	0.00973394	0.0121368	0.0213778	0.0656603	0.027972	0.0207111	0.0605848	0.0316213	0	0	0	0	0	0.000499749	0	0.000823032	0	0	0	0	0
k__Bacteria; p__Firmicutes; c__Clostridia; o__Clostridiales; f__; g__; s__	1096	0.385692	#NUM!	0	0.000189991	0	0.000400365	0	0	0	0	0	0	0	0	0	0	0	0	0	0	0.0013105	0	0	0	0	0	0.000620122	0	0	0.00053927	0	0	0
k__Bacteria; p__Firmicutes; c__Clostridia; o__Clostridiales; f__; g__; s__	1097	0.39943	1.8912	0.000736735	0.000198611	0.0013701	0.000603276	0	0	0	0	0	0.000552416	0	0.000505699	0.00173333	0.00402634	0.0034965	0	0	0	0	0	0	0	0	0	0.00217043	0.000411516	0	0	0	0	0
k__Bacteria; p__Firmicutes; c__Clostridia; o__Clostridiales; f__; g__; s__	1098	0.000898693	3.96897	0.0402993	0.00257347	0.029451	0.00927877	0.0271024	0	0.00891595	0.0140851	0.0469684	0.0535844	0.0811162	0.0434901	0.0647111	0.073713	0.0792541	0.00295873	0.00956602	0.0587252	0	0.0334551	0	0	0	0	0	0	0	0	0	0	0
k__Bacteria; p__Firmicutes; c__Clostridia; o__Clostridiales; f__; g__; s__	1099	0.000967903	2.64406	0.0136033	0.00217621	0.0130442	0.00772363	0.0542047	0.0175085	0.00216144	0.00650082	0.00630064	0.0187821	0.00619432	0.0116311	0.00548889	0.012079	0.0174825	0.00394497	0.019132	0.00903465	0	0.0278792	0	0	0	0	0	0.000411516	0	0	0	0	0
k__Bacteria; p__Firmicutes; c__Clostridia; o__Clostridiales; f__; g__; s__	1100	0.000794953	2.84324	0.0323855	0.00451283	0.0229357	0.00379745	0.0464612	0.0962969	0.00108072	0.0502008	0.0163244	0.0353546	0.0138635	0.0197223	0.0433333	0.0284941	0.020979	0.0345185	0.0286981	0.0180693	0.00524198	0.00836377	0.0130995	0.00475359	0.00148552	0.000749623	0.00155031	0.00905335	0.00441335	0.0053927	0	0.00209242	0.00247069
k__Bacteria; p__Firmicutes; c__Clostridia; o__Clostridiales; f__; g__; s__	1101	0.259014	4.393	0.00390371	0.000185804	0.00588121	0.000463966	0	0	0	0.00830661	0.0120285	0.00165725	0.0171081	0	0	0.00371662	0	0.0118349	0	0	0	0	0	0	0	0.000499749	0	0.00164606	0	0.000269635	0	0	0
k__Bacteria; p__Firmicutes; c__Clostridia; o__Clostridiales; f__; g__; s__	1102	0.296935	0.12498	0.00174116	0.00159667	0.00207688	0.00358098	0	0	0.0027018	0.0050562	0.00200475	0.000828624	0	0.0030342	0.0052	0.000619437	0	0.00493121	0	0	0.00786297	0	0	0	0	0	0.00186037	0	0.0110334	0	0	0	0
k__Bacteria; p__Firmicutes; c__Clostridia; o__Clostridiales; f__; g__; s__	1103	0.010871	1.58216	0.0134628	0.00449635	0.0138216	0.0115336	0.0154871	0	0.0013509	0.0104735	0.0037231	0.0168487	0.0171081	0.0404559	0.0459333	0.0105304	0.0034965	0.0108487	0.00318867	0.00903465	0.00917347	0.0418188	0.00392984	0	0	0	0	0	0	0.000269635	0.00326073	0	0
k__Bacteria; p__Firmicutes; c__Clostridia; o__Clostridiales; f__; g__; s__	1104	0.422404	#DIV/0!	0.000533804	0	0.00125327	0	0.00387177	0	0	0	0	0	0.000589936	0	0	0	0	0	0	0.00301155	0	0	0	0	0	0	0	0	0	0	0	0	0
k__Bacteria; p__Firmicutes; c__Clostridia; o__Clostridiales; f__; g__; s__	1105	0.259014	-2.51384	0.000276555	0.00157952	0.00103477	0.00315327	0.00387177	0	0	0	0	0	0	0	0	0	0	0	0	0	0	0.00278792	0	0	0	0	0.00248049	0.00164606	0.00220668	0	0.0114125	0	0
k__Bacteria; p__Firmicutes; c__Clostridia; o__Clostridiales; f__; g__; s__	1106	0.000967903	2.81354	0.185808	0.0264305	0.116069	0.0680208	0.0580765	0.0437713	0.0813243	0.31204	0.0406678	0.196108	0.372544	0.236667	0.345222	0.240651	0.276224	0.0700232	0.130736	0.197256	0	0.111517	0.00130995	0	0.000247587	0.000499749	0	0.228391	0	0	0.00163036	0	0
k__Bacteria; p__Firmicutes; c__Clostridia; o__Clostridiales; f__; g__; s__	1107	0.00502736	-7.09352	7.98223e-05	0.0109015	0.000228855	0.0197122	0	0	0	0	0	0.000828624	0	0	0.000288889	0	0	0	0	0	0.0524198	0	0	0.00356519	0.00198069	0.00724636	0.00217043	0	0.0573736	0.000269635	0.00652146	0.00523106	0.00494138
k__Bacteria; p__Firmicutes; c__Clostridia; o__Clostridiales; f__; g__; s__	1108	0.00235092	1.67414	0.0267801	0.00839163	0.0165203	0.0224645	0.00387177	0.0437713	0.0108072	0.025281	0.00916456	0.033145	0.0353961	0.0273078	0.0358222	0.0117693	0.0151515	0.0187386	0.0414528	0.0632425	0.00655248	0.0167275	0	0	0	0	0.00186037	0.0814801	0	0	0	0	0.00247069
k__Bacteria; p__Firmicutes; c__Clostridia; o__Clostridiales; f__; g__; s__	1109	0.00221618	#DIV/0!	0.00365221	0	0.00420148	0	0.0154871	0	0.00027018	0.00144463	0.00257753	0.00552416	0.00707923	0.0015171	0.00433333	0.00185831	0.004662	0	0.00637735	0	0	0	0	0	0	0	0	0	0	0	0	0	0
k__Bacteria; p__Firmicutes; c__Clostridia; o__Clostridiales; f__; g__; s__	1110	0.786803	#NUM!	0	0.000402389	0	0.00145083	0	0	0	0	0	0	0	0	0	0	0	0	0	0	0	0	0	0	0	0	0	0	0	0	0	0.00523106	0
k__Bacteria; p__Firmicutes; c__Clostridia; o__Clostridiales; f__; g__; s__	1111	0.174404	2.68914	0.00138309	0.000214456	0.00289727	0.000773231	0	0	0.000540361	0.00288925	0.000286393	0	0	0.010114	0.000577778	0.00495549	0	0	0	0	0	0.00278792	0	0	0	0	0	0	0	0	0	0	0
k__Bacteria; p__Firmicutes; c__Clostridia; o__Clostridiales; f__; g__; s__	1112	0.00647832	10.3568	0.0252057	1.92211e-05	0.0584152	6.93027e-05	0.00774353	0.218857	0	0.000361157	0.000859178	0.0234777	0.00383458	0	0.000288889	0.0322107	0.004662	0	0.0605848	0	0	0	0	0	0	0.000249874	0	0	0	0	0	0	0
k__Bacteria; p__Firmicutes; c__Clostridia; o__Clostridiales; f__; g__; s__	1113	0.0240997	#DIV/0!	0.00370838	0	0.0064243	0	0.0232306	0	0	0.00650082	0.00229114	0.00635278	0.000589936	0	0.000288889	0.00309718	0	0	0.00956602	0	0	0	0	0	0	0	0	0	0	0	0	0	0
k__Bacteria; p__Firmicutes; c__Clostridia; o__Clostridiales; f__; g__; s__	1114	0.00647832	2.05795	0.00743897	0.00178652	0.00605728	0.00300337	0.0116153	0.00875427	0.000810541	0.00144463	0.0040095	0.00662899	0.00176981	0.00505699	0.00635555	0.00557493	0.016317	0.00197248	0.0127547	0.0210808	0.00786297	0.00836377	0	0	0	0.00149925	0	0.00329213	0.00220668	0	0	0	0
k__Bacteria; p__Firmicutes; c__Clostridia; o__Clostridiales; f__; g__; s__	1115	0.00959346	1.21916	0.00698988	0.00300238	0.0116926	0.0108252	0	0.0175085	0.00027018	0.000361157	0	0.00801003	0.000589936	0.000505699	0.0026	0.00154859	0.0174825	0	0.0414528	0.00752887	0	0.0390309	0	0	0	0	0	0	0	0	0	0	0
k__Bacteria; p__Firmicutes; c__Clostridia; o__Clostridiales; f__; g__; s__	1116	0.00436234	6.03584	0.0203011	0.000309421	0.0308984	0.000819145	0	0.0525256	0.00162108	0.0931785	0.0037231	0.00497174	0	0.0015171	0.00288889	0.00464578	0.00582751	0.0463534	0.0669622	0	0	0.00278792	0	0	0	0	0	0.00123455	0	0	0	0	0
k__Bacteria; p__Firmicutes; c__Clostridia; o__Clostridiales; f__; g__; s__	1117	0.000514711	4.5797	0.0307691	0.00128673	0.0338225	0.00463938	0.0464612	0.0175085	0.00621415	0.0296149	0.0157516	0.0201632	0.0227125	0.0308477	0.0196444	0.0554396	0.016317	0.00394497	0.137113	0.00903465	0	0.0167275	0	0	0	0	0	0	0	0	0	0	0
k__Bacteria; p__Firmicutes; c__Clostridia; o__Clostridiales; f__; g__; s__	1118	0.000458554	-5.82036	0.00152481	0.0861625	0.0030978	0.115311	0	0	0	0.00144463	0.00114557	0.00220966	0.00235974	0	0.00173333	0.000619437	0	0.0118349	0	0	0.0891137	0.0167275	0.0314387	0.0356519	0.0131221	0.0797099	0.259521	0.00411516	0.394995	0.00593197	0.0782575	0.0151701	0.096357
k__Bacteria; p__Firmicutes; c__Clostridia; o__Clostridiales; f__; g__; s__	1119	0.422404	-1.31079	0.0010759	0.00266907	0.00227041	0.00572896	0	0	0	0.000722314	0.000572785	0.00220966	0	0.00809119	0.00346667	0	0	0	0	0	0.00917347	0	0	0	0.000247587	0.00124937	0.00217043	0.000411516	0.0198601	0.00053927	0	0.00104621	0
k__Bacteria; p__Firmicutes; c__Clostridia; o__Clostridiales; f__; g__; s__	1120	0.746609	-5.29232	2.04566e-05	0.000801642	7.65416e-05	0.00234222	0	0	0	0	0.000286393	0	0	0	0	0	0	0	0	0	0	0.00836377	0	0	0	0	0	0.00205758	0	0	0	0	0
k__Bacteria; p__Firmicutes; c__Clostridia; o__Clostridiales; f__; g__; s__	1121	0.422404	#DIV/0!	0.00014326	0	0.000332346	0	0	0	0.000540361	0	0	0	0	0	0.00115556	0.000309718	0	0	0	0	0	0	0	0	0	0	0	0	0	0	0	0	0
k__Bacteria; p__Firmicutes; c__Clostridia; o__Clostridiales; f__; g__; s__	1122	0.00047227	4.24151	0.0260366	0.00137646	0.0166763	0.00384456	0.0232306	0.00875427	0.00486325	0.0140851	0.00687342	0.027897	0.0212377	0.0176995	0.0268667	0.0278747	0.0559441	0.0256423	0.0478301	0.0557137	0	0.0139396	0	0	0	0.000249874	0	0.0024691	0	0	0	0	0.00123535
k__Bacteria; p__Firmicutes; c__Clostridia; o__Clostridiales; f__; g__; s__	1123	0.239594	#NUM!	0	0.00030564	0	0.000581425	0	0	0	0	0	0	0	0	0	0	0	0	0	0	0	0	0	0	0.00148552	0.000249874	0.000620122	0	0	0.00161781	0	0	0
k__Bacteria; p__Firmicutes; c__Clostridia; o__Clostridiales; f__; g__; s__	1124	0.00162797	2.01	0.0171481	0.00425739	0.00803381	0.00728693	0.0193588	0.0262628	0.00702469	0.0104735	0.00458228	0.0220966	0.0168132	0.015171	0.0231111	0.0210608	0.0291375	0.0207111	0.00318867	0.0210808	0	0.0167275	0	0.0190143	0	0	0.000310061	0.0144031	0	0	0.00489109	0	0
k__Bacteria; p__Firmicutes; c__Clostridia; o__Clostridiales; f__; g__; s__	1125	0.00123317	1.97166	0.0978249	0.0249415	0.0325627	0.0659588	0.120025	0.0787884	0.0243162	0.0975124	0.0495459	0.123741	0.0601734	0.112771	0.120467	0.13194	0.111888	0.119335	0.12117	0.0978754	0.239821	0.0473947	0.00392984	0.0202027	0.00074276	0	0.00186037	0.0102879	0	0	0	0	0
k__Bacteria; p__Firmicutes; c__Clostridia; o__Clostridiales; f__; g__; s__	1126	0.600367	#DIV/0!	0.00337441	0	0.0120557	0	0	0	0	0	0	0	0	0.0020228	0	0.0452189	0	0	0	0	0	0	0	0	0	0	0	0	0	0	0	0	0
k__Bacteria; p__Firmicutes; c__Clostridia; o__Clostridiales; f__; g__; s__	1127	0.00403061	3.22861	0.084931	0.00906059	0.108543	0.0231211	0.0154871	0.0612799	0.00648433	0.1748	0.0595697	0.0364595	0.18052	0.0182052	0.0190667	0.034069	0.375291	0.198235	0.00956602	0	0	0.0418188	0	0	0	0.000249874	0	0.0757189	0	0	0	0	0
k__Bacteria; p__Firmicutes; c__Clostridia; o__Clostridiales; f__; g__; s__	1128	0.661359	-5.54044	4.50955e-05	0.0020988	0.000116011	0.00481803	0	0	0.00027018	0.000361157	0	0	0	0	0	0	0	0	0	0	0.0117945	0.0139396	0	0	0	0	0.00155031	0	0	0	0	0	0
k__Bacteria; p__Firmicutes; c__Clostridia; o__Clostridiales; f__; g__; s__	1129	0.103375	-0.539834	0.00108014	0.00157032	0.00162479	0.00558722	0	0	0.00027018	0.000722314	0.000572785	0.00138104	0.000884904	0.0020228	0.00462222	0.00464578	0	0	0	0	0	0	0	0	0	0.000249874	0	0.0201643	0	0	0	0	0
k__Bacteria; p__Firmicutes; c__Clostridia; o__Clostridiales; f__; g__; s__	1130	0.000497244	-4.96651	0.0562941	1.76008	0.0726894	1.2524	0.0542047	0.0262628	0.0502536	0.00794545	0.00801899	0.143628	0.00442452	0.0404559	0.0297555	0.0034069	0.020979	0.111445	0.0223207	0.265016	1.48217	0.0808498	3.36263	0.660748	4.09038	2.32833	3.42959	0.153495	1.90436	1.72081	1.06626	1.52538	1.07599
k__Bacteria; p__Firmicutes; c__Clostridia; o__Clostridiales; f__; g__; s__	1131	0.00647832	#NUM!	0	0.00160703	0	0.00163752	0	0	0	0	0	0	0	0	0	0	0	0	0	0	0	0	0	0.00356519	0.00198069	0.000249874	0.00186037	0	0.00441335	0.000808904	0.00326073	0.00104621	0.00370604
k__Bacteria; p__Firmicutes; c__Clostridia; o__Clostridiales; f__; g__; s__	1132	0.000514711	5.29402	0.0149034	0.000379861	0.0207196	0.00136961	0.0232306	0.00875427	0.000810541	0.00325041	0.00257753	0.00801003	0.0073742	0.00606839	0.00462222	0.0712352	0.002331	0.0118349	0.0510188	0.00752887	0	0	0	0	0	0	0	0.00493819	0	0	0	0	0
k__Bacteria; p__Firmicutes; c__Clostridia; o__Clostridiales; f__; g__; s__	1133	0.16748	#DIV/0!	0.00112087	0	0.00256407	0	0	0.00875427	0	0	0	0.00497174	0.000294968	0.000505699	0	0	0.0011655	0	0	0	0	0	0	0	0	0	0	0	0	0	0	0	0
k__Bacteria; p__Firmicutes; c__Clostridia; o__Clostridiales; f__; g__; s__	1134	0.00305382	-5.23554	0.0027276	0.102763	0.00348414	0.126904	0	0	0.0027018	0.0025281	0.00171836	0.00441933	0.0129786	0.00606839	0.00115556	0	0.0011655	0.00394497	0	0.00150577	0.0353834	0.0306671	0.0563277	0.108144	0.0611539	0.00299849	0.25239	0.00370364	0.225081	0.00512306	0.13369	0	0.421253
k__Bacteria; p__Firmicutes; c__Clostridia; o__Clostridiales; f__; g__; s__	1135	0.913955	-0.396285	0.00987438	0.0129958	0.00591138	0.0162096	0	0.0175085	0.0113476	0.0108347	0.0194747	0.00607658	0.0150434	0.010114	0.0127111	0.00495549	0.00582751	0.0138074	0	0.0105404	0.00786297	0.0111517	0.0589476	0.00475359	0.000247587	0.00124937	0.0155031	0.00987638	0.0176534	0	0.0293466	0	0.0123535
k__Bacteria; p__Firmicutes; c__Clostridia; o__Clostridiales; f__; g__; s__	1136	0.931591	1.01301	0.0024587	0.00121831	0.00636631	0.00197042	0	0	0	0.00108347	0	0.0035907	0.0241874	0.000505699	0.00173333	0.000309718	0	0	0	0.00301155	0.00262099	0	0	0	0	0.000249874	0.00186037	0	0.00662003	0.00134817	0	0.00313863	0
k__Bacteria; p__Firmicutes; c__Clostridia; o__Clostridiales; f__; g__; s__	1137	0.0428566	1.52661	0.00361325	0.00125413	0.00512063	0.00452182	0.00387177	0	0.00027018	0.0133628	0	0.0157439	0.00294968	0.0020228	0	0.000619437	0.00582751	0.00591745	0	0	0	0	0	0	0	0	0	0	0	0	0.0163036	0	0
k__Bacteria; p__Firmicutes; c__Clostridia; o__Clostridiales; f__; g__; s__	1138	0.600367	0.998063	0.0011231	0.000562302	0.00155564	0.00100229	0.00387177	0	0	0	0	0.00303829	0	0.00353989	0.00115556	0.000929155	0	0	0.00318867	0	0.0013105	0	0	0.0011884	0	0	0.00155031	0	0	0	0.00326073	0	0
k__Bacteria; p__Firmicutes; c__Clostridia; o__Clostridiales; f__; g__; s__	1139	0.600367	-0.447285	0.00440171	0.00600161	0.00540719	0.0073562	0	0.00875427	0	0.00541735	0	0.00828624	0.0126836	0.00707979	0.00231111	0.0161054	0	0.000986242	0	0	0	0.00557585	0	0	0.00198069	0.0152423	0.0096119	0.00288061	0.0198601	0.00107854	0.00326073	0	0.0185302
k__Bacteria; p__Firmicutes; c__Clostridia; o__Clostridiales; f__; g__; s__	1140	0.00266011	#NUM!	0	0.0382102	0	0.0656554	0	0	0	0	0	0	0	0	0	0	0	0	0	0	0.00524198	0	0	0.0142608	0	0.0527235	0.238437	0.00370364	0.0838537	0.0533877	0.00163036	0.0224935	0.0210009
k__Bacteria; p__Firmicutes; c__Clostridia; o__Clostridiales; f__; g__; s__	1141	0.040598	3.95551	0.016435	0.00105935	0.0277146	0.00311763	0	0.0612799	0.00027018	0.0502008	0.00572785	0	0	0	0.00433333	0.00309718	0.013986	0.0848168	0.00637735	0	0	0.0111517	0.00261989	0	0	0	0	0	0	0	0	0	0
k__Bacteria; p__Firmicutes; c__Clostridia; o__Clostridiales; f__; g__; s__	1142	0.00221618	#DIV/0!	0.00296405	0	0.00511945	0	0.0193588	0	0.000810541	0.00108347	0.000286393	0	0.00589936	0.000505699	0.00231111	0.00123887	0.00582751	0.000986242	0.00318867	0	0	0	0	0	0	0	0	0	0	0	0	0	0
k__Bacteria; p__Firmicutes; c__Clostridia; o__Clostridiales; f__; g__; s__	1143	0.786803	-0.363222	0.00817738	0.0105185	0.00612909	0.0128396	0.0116153	0	0.000540361	0.0119182	0.0077326	0.00441933	0.00884904	0.0227565	0.00462222	0.00495549	0.00699301	0.0118349	0.00318867	0.0150577	0.0275204	0	0.00916962	0	0	0.00774611	0.0173634	0.0102879	0.0353068	0	0.0293466	0	0
k__Bacteria; p__Firmicutes; c__Clostridia; o__Clostridiales; f__; g__; s__	1144	0.0153234	7.1092	0.00437045	3.16551e-05	0.00719123	0.000114134	0.0271024	0	0	0.000722314	0.000859178	0.00469554	0	0.00404559	0.00722222	0.00402634	0.00932401	0	0.00318867	0	0	0	0	0	0	0	0	0.000411516	0	0	0	0	0
k__Bacteria; p__Firmicutes; c__Clostridia; o__Clostridiales; f__; g__; s__	1145	0.00349216	0.783337	0.0418247	0.024301	0.0306489	0.0734881	0.0154871	0.105051	0.00243162	0.0693421	0.0644383	0.0778907	0.0156333	0.0556269	0.0280222	0.0455286	0.0104895	0.024656	0.0573961	0.013552	0	0.267641	0.0104796	0.00594198	0.000247587	0	0.00279055	0.026337	0.00220668	0.000269635	0	0	0
k__Bacteria; p__Firmicutes; c__Clostridia; o__Clostridiales; f__; g__; s__	1146	0.000458554	-6.6249	0.000629843	0.0621621	0.00154961	0.0641829	0	0	0	0	0	0.00386691	0	0	0.000288889	0	0.004662	0	0	0	0.0209679	0.00557585	0.0183392	0.0641734	0.058678	0.0242378	0.116273	0.0024691	0.229494	0.0833172	0.125538	0.0355712	0.0234716
k__Bacteria; p__Firmicutes; c__Clostridia; o__Clostridiales; f__; g__; s__	1147	1	#DIV/0!	0	0	0	0	0	0	0	0	0	0	0	0	0	0	0	0	0	0	0	0	0	0	0	0	0	0	0	0	0	0	0
k__Bacteria; p__Firmicutes; c__Clostridia; o__Clostridiales; f__; g__; s__	1148	0.0010873	1.78452	0.021334	0.00619269	0.0107842	0.0208066	0.0193588	0.00875427	0.00729487	0.00939008	0.00572785	0.0306591	0.0162232	0.0268021	0.0225333	0.0188928	0.032634	0.0335322	0.0382641	0.0286097	0	0.0752739	0	0	0	0	0	0	0	0	0	0.00523106	0
k__Bacteria; p__Firmicutes; c__Clostridia; o__Clostridiales; f__; g__; s__	1149	0.2764	#DIV/0!	0.000430661	0	0.000861964	0	0	0	0	0	0	0.00276208	0.000294968	0	0.00173333	0.00123887	0	0	0	0	0	0	0	0	0	0	0	0	0	0	0	0	0
k__Bacteria; p__Firmicutes; c__Clostridia; o__Clostridiales; f__; g__; s__	1150	0.190108	-1.30326	0.00355145	0.00876446	0.00601121	0.0109824	0.0154871	0.0175085	0.00324217	0.00866776	0.0037231	0.000276208	0	0.000505699	0	0.000309718	0	0	0	0	0	0.0306671	0.00261989	0.0166376	0.000495173	0.00274862	0.0238747	0.0242794	0.00441335	0	0.00326073	0	0.00494138
k__Bacteria; p__Firmicutes; c__Clostridia; o__Clostridiales; f__; g__; s__	1151	0.0341146	-0.372725	0.0297805	0.0385596	0.0189335	0.08386	0.0193588	0.0612799	0.00810541	0.029976	0.0211931	0.0522033	0.0371659	0.0510756	0.0239778	0.0105304	0.030303	0.000986242	0.0542075	0.0165635	0.00262099	0.00278792	0	0	0	0	0.000310061	0.00288061	0.0110334	0.00593197	0.247815	0.0240629	0.203832
k__Bacteria; p__Firmicutes; c__Clostridia; o__Clostridiales; f__; g__; s__	1152	0.00461852	2.70681	0.0184084	0.00281958	0.0210935	0.0100431	0.0387177	0	0.00405271	0.00830661	0.00200475	0.0287256	0.0115037	0.0176995	0.0248444	0.0164151	0.0198135	0.00591745	0.0797168	0	0	0.036243	0	0	0	0	0	0.000411516	0	0	0	0	0
k__Bacteria; p__Firmicutes; c__Clostridia; o__Clostridiales; f__; g__; s__	1153	0.000514711	#DIV/0!	0.00986097	0	0.0090239	0	0.0309741	0	0.0027018	0.0148074	0.00343671	0.0113245	0.0200578	0.00404559	0.00924444	0.0130082	0.0198135	0.00394497	0.00318867	0.00150577	0	0	0	0	0	0	0	0	0	0	0	0	0
k__Bacteria; p__Firmicutes; c__Clostridia; o__Clostridiales; f__; g__; s__	1154	0.632473	0.842074	0.00394293	0.00219953	0.00815188	0.00236684	0	0	0	0.00722314	0.000286393	0.00138104	0.0294968	0.0030342	0.00173333	0	0	0	0	0.0120462	0.00655248	0	0	0.00356519	0.000495173	0.000999498	0.00310061	0.000823032	0	0.00269635	0	0.00418484	0.00617673
k__Bacteria; p__Firmicutes; c__Clostridia; o__Clostridiales; f__; g__; s__	1155	0.00461852	1.34858	0.0679788	0.0266939	0.0543819	0.0646627	0.100666	0.201348	0.0124283	0.0527289	0.0756077	0.0629754	0.018583	0.122379	0.0681777	0.122339	0.0128205	0.0631195	0.0159434	0.0225866	0	0.21467	0.00261989	0.00356519	0.000247587	0.00724636	0.00124024	0.115224	0.00220668	0	0	0	0
k__Bacteria; p__Firmicutes; c__Clostridia; o__Clostridiales; f__; g__; s__	1156	0.000497244	2.69591	0.651593	0.10056	0.212919	0.158851	0.83243	0.53401	0.275854	0.437361	0.358564	0.940212	0.582856	0.630607	0.782022	0.926058	0.893939	0.522708	0.637735	0.767945	0.110082	0.521342	0.0183392	0.127158	0.00420897	0.00574711	0.0189137	0.345673	0.0198601	0.00404452	0.115756	0.00627727	0.00988277
k__Bacteria; p__Firmicutes; c__Clostridia; o__Clostridiales; f__; g__; s__	1157	0.000458554	#DIV/0!	0.0396079	0	0.0268757	0	0.00774353	0.0350171	0.0145897	0.0292537	0.0168972	0.0381167	0.0212377	0.0308477	0.0317778	0.112118	0.0675991	0.0493121	0.0382641	0.0617368	0	0	0	0	0	0	0	0	0	0	0	0	0
k__Bacteria; p__Firmicutes; c__Clostridia; o__Clostridiales; f__; g__; s__	1158	0.00461852	2.49342	0.00898073	0.00159484	0.00794416	0.00489803	0.00387177	0	0.000540361	0.0140851	0.00859178	0.00414312	0.0200578	0.0182052	0.00433333	0.00774296	0.0221445	0.00394497	0	0.0180693	0	0.00278792	0	0	0	0.000249874	0	0.0176952	0	0	0	0	0
k__Bacteria; p__Firmicutes; c__Clostridia; o__Clostridiales; f__; g__; s__	1159	0.000514711	#DIV/0!	0.0111628	0	0.0121615	0	0.0309741	0	0.00324217	0.00866776	0.00544146	0.00552416	0.036871	0.0025285	0.0291778	0.00991099	0.0011655	0.000986242	0.0127547	0.00903465	0	0	0	0	0	0	0	0	0	0	0	0	0
k__Bacteria; p__Firmicutes; c__Clostridia; o__Clostridiales; f__; g__; s__	1160	0.879697	-2.4762	0.00102413	0.00569859	0.00166859	0.0151623	0	0	0.00027018	0.000722314	0	0.000276208	0.000884904	0.00505699	0.00144444	0	0.0011655	0	0	0.00451732	0.010484	0	0.00392984	0	0	0	0.00124024	0	0.0551669	0	0.00326073	0	0
k__Bacteria; p__Firmicutes; c__Clostridia; o__Clostridiales; f__; g__; s__	1161	0.00647832	#NUM!	0	0.00520014	0	0.0112503	0	0	0	0	0	0	0	0	0	0	0	0	0	0	0.0013105	0	0.00261989	0	0.00123793	0.00124937	0.00589116	0	0.0419269	0	0.00652146	0.00313863	0.00370604
k__Bacteria; p__Firmicutes; c__Clostridia; o__Clostridiales; f__; g__; s__	1162	0.00256799	3.19485	0.00560777	0.000612413	0.00546307	0.00116401	0.00387177	0	0.00216144	0.000361157	0.00229114	0.0135342	0.00176981	0.000505699	0.0135778	0.0145568	0.004662	0.00394497	0.0127547	0.00451732	0.00393149	0	0	0	0	0.00174912	0	0.00123455	0	0	0	0.00104621	0
k__Bacteria; p__Firmicutes; c__Clostridia; o__Clostridiales; f__; g__; s__	1163	0.0987395	-7.69683	2.06349e-05	0.00428133	7.72088e-05	0.00702373	0	0	0	0	0	0	0	0	0.000288889	0	0	0	0	0	0.0209679	0	0	0.0130724	0	0	0.000620122	0	0.0132401	0	0.00652146	0	0.00123535
k__Bacteria; p__Firmicutes; c__Clostridia; o__Clostridiales; f__; g__; s__	1164	0.575106	#NUM!	0	0.000245436	0	0.000796396	0	0	0	0	0	0	0	0	0	0	0	0	0	0	0	0	0	0	0	0	0.000310061	0.00288061	0	0	0	0	0
k__Bacteria; p__Firmicutes; c__Clostridia; o__Clostridiales; f__; g__; s__	1165	0.000794953	4.53802	0.0149464	0.000643367	0.0114527	0.00231969	0.0116153	0	0.00189126	0.00108347	0.00171836	0.0187821	0.0129786	0.0227565	0.0156	0.0275649	0.032634	0.0295873	0.0255094	0.00752887	0	0.00836377	0	0	0	0	0	0	0	0	0	0	0
k__Bacteria; p__Firmicutes; c__Clostridia; o__Clostridiales; f__; g__; s__	1166	0.00461852	2.57183	0.00353359	0.000594316	0.0027346	0.00151565	0.00774353	0	0.000810541	0	0.0040095	0.000276208	0.00648929	0.0015171	0.0052	0.00309718	0.00699301	0.00394497	0.00637735	0.00301155	0	0.00278792	0	0	0	0	0	0.00493819	0	0	0	0	0
k__Bacteria; p__Firmicutes; c__Clostridia; o__Clostridiales; f__; g__; s__	1167	0.000514711	#DIV/0!	0.0041563	0	0.00393236	0	0.0116153	0	0.000810541	0.000361157	0.000859178	0.00441933	0.00383458	0.0015171	0.00664444	0.00371662	0.002331	0.00197248	0.00956602	0.0105404	0	0	0	0	0	0	0	0	0	0	0	0	0
k__Bacteria; p__Firmicutes; c__Clostridia; o__Clostridiales; f__; g__; s__	1168	0.00221618	#DIV/0!	0.00615512	0	0.00687934	0	0.0193588	0	0.00351235	0.00613967	0.00343671	0.0033145	0.00353961	0.0111254	0.0052	0.00526521	0	0.00295873	0.0223207	0	0	0	0	0	0	0	0	0	0	0	0	0	0
k__Bacteria; p__Firmicutes; c__Clostridia; o__Clostridiales; f__; g__; s__	1169	0.239594	1.1618	0.00629304	0.0028127	0.0113059	0.00479915	0	0.0437713	0.000810541	0.00361157	0.00114557	0.00828624	0.000294968	0.00404559	0.00375555	0.0117693	0	0.00591745	0.00318867	0.00150577	0	0.0167275	0.00261989	0	0	0.00124937	0.000930184	0.00823032	0.00441335	0.00134817	0	0.00104621	0
k__Bacteria; p__Firmicutes; c__Clostridia; o__Clostridiales; f__; g__; s__	1170	0.000458554	#DIV/0!	0.0140622	0	0.0171681	0	0.0387177	0.0175085	0.00108072	0.0025281	0.000572785	0.0033145	0.00412955	0.0025285	0.00808889	0.0133179	0.020979	0.00394497	0.0605848	0.0195751	0	0	0	0	0	0	0	0	0	0	0	0	0
k__Bacteria; p__Firmicutes; c__Clostridia; o__Clostridiales; f__; g__; s__	1171	0.966777	-0.231355	0.00386152	0.00453318	0.00436584	0.00555402	0	0	0.00432289	0.00325041	0.00200475	0.00276208	0.00176981	0.0010114	0.00317778	0.00402634	0.016317	0.00788994	0	0.00752887	0.00917347	0	0.00916962	0.0178259	0.00123793	0.000749623	0.00217043	0	0.00220668	0.00161781	0	0.00366174	0.0111181
k__Bacteria; p__Firmicutes; c__Clostridia; o__Clostridiales; f__; g__; s__	1172	0.125016	1.0139	0.00198161	0.000981307	0.00438109	0.00353815	0	0	0.00108072	0.000722314	0	0.00110483	0.000294968	0.00657409	0.00202222	0	0	0	0.0159434	0	0	0	0	0	0	0	0	0.012757	0	0	0	0	0
k__Bacteria; p__Firmicutes; c__Clostridia; o__Clostridiales; f__; g__; s__	1173	0.520786	-0.37514	0.016748	0.0217216	0.013832	0.0159451	0	0.0262628	0.0170214	0.00469504	0.00343671	0.014639	0.00678426	0.0131482	0.0228222	0.0226094	0.0337995	0.0502983	0.0159434	0.00301155	0.0419359	0.0111517	0.0183392	0.0190143	0.0163407	0.0412293	0.00372073	0.00740729	0.00220668	0.019953	0.0505413	0.0381867	0.0123535
k__Bacteria; p__Firmicutes; c__Clostridia; o__Clostridiales; f__; g__; s__	1174	0.011125	#DIV/0!	0.00132244	0	0.00203738	0	0.00774353	0	0.000810541	0.000361157	0	0.00220966	0.00147484	0.0010114	0.00231111	0.000619437	0	0.00197248	0	0	0	0	0	0	0	0	0	0	0	0	0	0	0
k__Bacteria; p__Firmicutes; c__Clostridia; o__Clostridiales; f__; g__; s__	1175	0.746609	-7.53008	3.94583e-05	0.00729321	0.000147639	0.0178391	0	0	0	0	0	0.000552416	0	0	0	0	0	0	0	0	0	0.0446068	0	0	0	0	0	0.0502049	0	0	0	0	0
k__Bacteria; p__Firmicutes; c__Clostridia; o__Clostridiales; f__; g__; s__	1176	0.148364	-4.729	0.00382528	0.101446	0.00647954	0.201384	0.00387177	0	0.0013509	0.0205859	0.00114557	0.00497174	0.0162232	0	0.000577778	0.000309718	0	0	0	0.00451732	0.15857	0.0306671	0.00523979	0.00475359	0	0.409294	0.651749	0.0106994	0.00441335	0.0434112	0	0	0
k__Bacteria; p__Firmicutes; c__Clostridia; o__Clostridiales; f__; g__; s__	1177	0.00542789	-2.2455	0.00894047	0.0423959	0.0287636	0.0455527	0.00774353	0	0	0.000722314	0.0077326	0.000552416	0	0	0	0	0	0	0	0.108416	0.0340729	0	0.0157194	0.0427823	0.00420897	0.0262368	0.0818562	0.00329213	0.147847	0.00431416	0.102713	0.069573	0.0185302
k__Bacteria; p__Firmicutes; c__Clostridia; o__Clostridiales; f__; g__; s__	1178	0.0240997	#DIV/0!	0.00764409	0	0.0133936	0	0.0464612	0.0175085	0	0.00180578	0	0.0201632	0.000294968	0.00455129	0.000288889	0	0	0	0.0159434	0	0	0	0	0	0	0	0	0	0	0	0	0	0
k__Bacteria; p__Firmicutes; c__Clostridia; o__Clostridiales; f__; g__; s__	1179	0.00903911	2.93566	0.00671029	0.000877043	0.00799252	0.00308792	0	0.0262628	0.0013509	0.00541735	0.00229114	0.000828624	0.0100289	0.00960829	0.00346667	0.0164151	0.002331	0	0.0159434	0	0	0.0111517	0	0	0	0.000249874	0	0	0	0	0	0	0
k__Bacteria; p__Firmicutes; c__Clostridia; o__Clostridiales; f__; g__; s__	1180	0.575106	-1.53966	0.0048595	0.0141279	0.00367742	0.0201843	0	0	0.00189126	0.00288925	0.00286393	0.0104959	0.0082591	0.00809119	0.00433333	0.0105304	0.0034965	0.00295873	0.00318867	0.00903465	0.0340729	0.036243	0.00130995	0.068927	0.00272345	0.00724636	0.00527104	0.00740729	0.00662003	0.000808904	0.00652146	0.00156932	0.00494138
k__Bacteria; p__Firmicutes; c__Clostridia; o__Clostridiales; f__; g__; s__	1181	0.422404	#DIV/0!	0.000443879	0	0.00119212	0	0	0	0	0.000361157	0	0	0	0.0015171	0	0.00433606	0	0	0	0	0	0	0	0	0	0	0	0	0	0	0	0	0
k__Bacteria; p__Firmicutes; c__Clostridia; o__Clostridiales; f__; g__; s__	1182	0.798659	-0.329513	0.00135224	0.00169921	0.00233225	0.00266201	0	0.00875427	0.00027018	0.00108347	0.000572785	0.000552416	0.00147484	0	0.000866666	0.00216803	0	0	0.00318867	0	0.00786297	0	0.00392984	0	0	0.00224887	0	0	0	0.00134817	0	0.000523106	0.00617673
k__Bacteria; p__Firmicutes; c__Clostridia; o__Clostridiales; f__; g__; s__	1183	0.0939245	#DIV/0!	0.000758149	0	0.00113424	0	0	0	0.000810541	0.00180578	0	0.0035907	0	0.000505699	0.00173333	0.00216803	0	0	0	0	0	0	0	0	0	0	0	0	0	0	0	0	0
k__Bacteria; p__Firmicutes; c__Clostridia; o__Clostridiales; f__; g__; s__	1184	0.047746	0.503717	0.238184	0.167988	0.328968	0.452021	0.06582	0.0437713	0.288283	1.0004	0.25403	0.13838	0.027137	0.196211	0.108044	0.0904378	0.030303	0.980324	0.0542075	0.0572194	0.0013105	1.65881	0.0681172	0.198462	0	0	0.0266653	0.113578	0.0220668	0.000269635	0.0945611	0	0
k__Bacteria; p__Firmicutes; c__Clostridia; o__Clostridiales; f__; g__; s__	1185	0.051879	-0.982469	0.00401091	0.00792493	0.00477081	0.00502621	0	0	0.00243162	0.000361157	0.0148924	0.00193346	0.00442452	0.0025285	0.00346667	0.00495549	0.00932401	0.0118349	0	0	0.00917347	0.0223034	0.00130995	0.00713038	0.00965588	0.00449774	0.0096119	0.00740729	0.00662003	0.00242671	0.00815182	0.00732348	0.00741207
k__Bacteria; p__Firmicutes; c__Clostridia; o__Clostridiales; f__; g__; s__	1186	0.00047227	4.40455	0.0291733	0.00137748	0.0176156	0.00341375	0.0464612	0.0175085	0.00540361	0.0119182	0.00801899	0.0372881	0.0165182	0.0171938	0.0286	0.0501744	0.0244755	0.0404359	0.0637735	0.0406559	0	0.00557585	0	0	0	0	0	0.0115224	0	0.000808904	0	0	0
k__Bacteria; p__Firmicutes; c__Clostridia; o__Clostridiales; f__; g__; s__	1187	0.00105731	-3.74927	0.00055311	0.00743794	0.00206955	0.00511717	0.00774353	0	0	0	0	0	0	0	0	0	0	0	0	0	0.00524198	0.00278792	0.0170293	0.0011884	0.00519932	0.0107446	0.00930184	0	0.00441335	0.0115943	0.00652146	0.00784658	0.0148241
k__Bacteria; p__Firmicutes; c__Clostridia; o__Clostridiales; f__; g__; s__	1188	0.661359	-1.35292	0.000716821	0.00183096	0.00185126	0.00319916	0	0	0.00027018	0.000361157	0	0	0.00678426	0	0.000288889	0	0.002331	0	0	0	0.00262099	0.00278792	0	0	0	0	0	0.0024691	0.0110334	0	0.00489109	0	0
k__Bacteria; p__Firmicutes; c__Clostridia; o__Clostridiales; f__; g__; s__	1189	0.520786	-3.98953	0.00147286	0.0233955	0.00128934	0.0431257	0.00387177	0	0.00162108	0.00108347	0.000572785	0.000828624	0.00383458	0.0010114	0.00231111	0.00216803	0.002331	0.000986242	0	0	0.15857	0.0250913	0	0.00950717	0	0	0.0344168	0.00864183	0.0353068	0	0.0326073	0	0
k__Bacteria; p__Firmicutes; c__Clostridia; o__Clostridiales; f__; g__; s__	1190	0.0341146	2.0164	0.00173526	0.000428911	0.0028675	0.00154646	0	0	0.000540361	0.000722314	0.000286393	0.00276208	0.000589936	0.0010114	0.00231111	0.00650409	0	0	0.00956602	0	0	0.00557585	0	0	0	0	0	0	0	0	0	0	0
k__Bacteria; p__Firmicutes; c__Clostridia; o__Clostridiales; f__; g__; s__	1191	0.010264	-4.67733	0.000284308	0.00727454	0.000672232	0.00885416	0	0	0.00027018	0.0025281	0.000286393	0.000276208	0	0	0	0.000619437	0	0	0	0	0.0209679	0	0.0117895	0.00713038	0.00222828	0.0287356	0.0096119	0.00205758	0	0.00296598	0	0.00784658	0.00123535
k__Bacteria; p__Firmicutes; c__Clostridia; o__Clostridiales; f__; g__; s__	1192	0.130986	-0.6485	0.00141637	0.00222021	0.00153148	0.0062955	0	0	0.00459307	0.00325041	0.00171836	0.00193346	0.00294968	0.0015171	0.000288889	0.000619437	0	0.00295873	0	0	0.0222784	0	0	0	0	0	0	0.00658425	0	0	0	0	0
k__Bacteria; p__Firmicutes; c__Clostridia; o__Clostridiales; f__; g__; s__	1193	0.00840891	1.45075	0.0236587	0.00865512	0.0148653	0.00576726	0.00774353	0.0262628	0.00675451	0.0126405	0.0128877	0.0193346	0.0109138	0.0268021	0.0144444	0.0356176	0.018648	0.0384634	0.0510188	0.0496906	0.0183469	0.0167275	0.0130995	0.00950717	0.00841795	0.013993	0.00124024	0.00534971	0.00882671	0.000269635	0.00652146	0.00156932	0.00864742
k__Bacteria; p__Firmicutes; c__Clostridia; o__Clostridiales; f__; g__; s__	1194	0.135107	0.98599	0.00169057	0.000853534	0.00182352	0.00160265	0	0	0.00027018	0	0.00200475	0.00193346	0.00176981	0.000505699	0.00173333	0.00123887	0.002331	0.000986242	0.00637735	0.00451732	0	0	0	0.00237679	0	0.00324837	0.000310061	0	0	0.000269635	0.00489109	0	0
k__Bacteria; p__Firmicutes; c__Clostridia; o__Clostridiales; f__; g__; s__	1195	0.000458554	4.35954	0.100811	0.00491081	0.0475795	0.0125044	0.0735636	0.0875427	0.04485	0.0642859	0.014606	0.145285	0.117987	0.087486	0.102267	0.102207	0.199301	0.128211	0.159434	0.0843234	0	0.0418188	0	0	0.000495173	0	0	0.0209873	0	0.00053927	0	0	0
k__Bacteria; p__Firmicutes; c__Clostridia; o__Clostridiales; f__; g__; s__	1196	0.16748	#DIV/0!	0.000393067	0	0.000798399	0	0	0	0	0	0	0.000552416	0	0.000505699	0.000866666	0.000619437	0	0.00295873	0	0	0	0	0	0	0	0	0	0	0	0	0	0	0
k__Bacteria; p__Firmicutes; c__Clostridia; o__Clostridiales; f__; g__; s__	1197	0.000514711	3.51389	0.0483845	0.00423563	0.0222757	0.0138473	0.0929224	0.0787884	0.0245864	0.0353934	0.0180427	0.0693282	0.045425	0.0530984	0.0548889	0.0427411	0.032634	0.0177524	0.0605848	0.0511963	0	0.0501826	0.00392984	0	0	0	0	0.000411516	0	0.00053927	0	0	0
k__Bacteria; p__Firmicutes; c__Clostridia; o__Clostridiales; f__; g__; s__	1198	0.0010873	1.86762	0.0152162	0.00416962	0.00957539	0.0146668	0.0116153	0.0175085	0.0013509	0.0162521	0.00859178	0.0110483	0.0289068	0.0389388	0.0112667	0.00619437	0.0151515	0.0118349	0.0223207	0.0120462	0	0.0529705	0	0	0	0	0	0.00123455	0	0	0	0	0
k__Bacteria; p__Firmicutes; c__Clostridia; o__Clostridiales; f__; g__; s__	1199	1	#DIV/0!	0	0	0	0	0	0	0	0	0	0	0	0	0	0	0	0	0	0	0	0	0	0	0	0	0	0	0	0	0	0	0
k__Bacteria; p__Firmicutes; c__Clostridia; o__Clostridiales; f__; g__; s__	1200	0.00647832	4.02541	0.0025774	0.000158275	0.00470992	0.00057067	0	0.0175085	0.00027018	0.000361157	0.000572785	0.0033145	0.000294968	0.0010114	0.000866666	0.000929155	0	0.00493121	0	0.0060231	0	0	0	0	0	0	0	0.00205758	0	0	0	0	0
k__Bacteria; p__Firmicutes; c__Clostridia; o__Clostridiales; f__; g__; s__	1201	0.0240997	#DIV/0!	0.00136524	0	0.00245839	0	0	0.00875427	0.0013509	0.00108347	0.000572785	0.000552416	0	0	0	0.000309718	0	0.00197248	0	0.00451732	0	0	0	0	0	0	0	0	0	0	0	0	0
k__Bacteria; p__Firmicutes; c__Clostridia; o__Clostridiales; f__; g__; s__	1202	0.798659	#DIV/0!	9.86457e-05	0	0.000369098	0	0	0	0	0	0	0.00138104	0	0	0	0	0	0	0	0	0	0	0	0	0	0	0	0	0	0	0	0	0
k__Bacteria; p__Firmicutes; c__Clostridia; o__Clostridiales; f__; g__; s__	1203	0.0010873	#NUM!	0	0.00354123	0	0.00587506	0	0	0	0	0	0	0	0	0	0	0	0	0	0	0.0013105	0	0.00785968	0.0213911	0.00198069	0.000999498	0.000930184	0.00123455	0.00220668	0.00107854	0.00652146	0.000523106	0
k__Bacteria; p__Firmicutes; c__Clostridia; o__Clostridiales; f__; g__; s__	1204	0.463699	-2.4023	0.000199042	0.00105222	0.000513784	0.00196453	0	0	0.00162108	0	0	0	0	0	0	0	0.0011655	0	0	0	0	0.00278792	0.00654973	0	0.00272345	0	0	0	0	0.00161781	0	0	0
k__Bacteria; p__Firmicutes; c__Clostridia; o__Clostridiales; f__; g__; s__	1205	0.731306	-1.55325	0.000940305	0.00275959	0.00185151	0.00670525	0.00387177	0	0.00108072	0.00144463	0.000572785	0	0	0	0	0.00619437	0	0	0	0	0	0.0195155	0	0	0	0	0.000310061	0.0160491	0	0	0	0	0
k__Bacteria; p__Firmicutes; c__Clostridia; o__Clostridiales; f__; g__; s__	1206	0.206077	-1.99552	0.000405168	0.00161565	0.00119665	0.00254826	0	0	0	0	0	0.000276208	0.000589936	0	0.000288889	0	0	0	0	0.00451732	0	0	0	0.00356519	0.000495173	0.000499749	0.00744147	0.00164606	0	0.00107854	0	0.00627727	0
k__Bacteria; p__Firmicutes; c__Clostridia; o__Clostridiales; f__; g__; s__	1207	0.422404	-3.50934	0.00157245	0.0179058	0.002402	0.0432967	0	0.00875427	0	0.00144463	0.000286393	0.00110483	0.00265471	0.00353989	0.000288889	0.000929155	0	0	0	0.00301155	0.0275204	0	0	0	0	0	0	0.000823032	0.152261	0	0.0521716	0	0
k__Bacteria; p__Firmicutes; c__Clostridia; o__Clostridiales; f__; g__; s__	1208	0.174404	0.451724	0.279596	0.204432	0.11009	0.161844	0.383305	0.175085	0.0880788	0.377409	0.331929	0.290295	0.209722	0.321625	0.175933	0.174371	0.363636	0.242616	0.277415	0.502929	0.149397	0.231398	0.292118	0.326809	0.0074276	0.0299849	0.230996	0.48312	0.209634	0.0506913	0.138581	0.0219704	0.485491
k__Bacteria; p__Firmicutes; c__Clostridia; o__Clostridiales; f__; g__; s__	1209	0.00221618	#DIV/0!	0.00349716	0	0.00381743	0	0.00774353	0	0.00027018	0.00144463	0.000286393	0.00580037	0.00235974	0.00556269	0.00491111	0.0126985	0	0	0.00637735	0.00150577	0	0	0	0	0	0	0	0	0	0	0	0	0
k__Bacteria; p__Firmicutes; c__Clostridia; o__Clostridiales; f__; g__; s__	1210	0.000794953	3.47089	0.0126701	0.00114272	0.0114194	0.00317676	0.00387177	0.00875427	0.00108072	0.00902892	0.00801899	0.0138104	0.018583	0.0374217	0.00635555	0.00960127	0.00815851	0.00690369	0.0382641	0.00752887	0	0.0111517	0	0	0	0	0	0.00370364	0	0	0	0	0
k__Bacteria; p__Firmicutes; c__Clostridia; o__Clostridiales; f__; g__; s__	1211	0.206077	1.07143	0.00405059	0.00192747	0.00408069	0.00240267	0.0116153	0	0.00162108	0.00144463	0.000859178	0.0033145	0.00117987	0.0015171	0.00173333	0.00805268	0.00699301	0.0108487	0	0.00752887	0.00262099	0	0.00392984	0.00475359	0.0074276	0.00349824	0.000620122	0	0.00220668	0	0	0	0
k__Bacteria; p__Firmicutes; c__Clostridia; o__Clostridiales; f__; g__; s__	1212	0.0492719	#DIV/0!	0.000739403	0	0.00088872	0	0	0	0	0.000722314	0	0.000828624	0.00235974	0.0015171	0.00202222	0.000929155	0	0.00197248	0	0	0	0	0	0	0	0	0	0	0	0	0	0	0
k__Bacteria; p__Firmicutes; c__Clostridia; o__Clostridiales; f__; g__; s__	1213	0.00502736	4.27929	0.005532	0.000284896	0.00924965	0.00102721	0	0.0350171	0.00027018	0.00216694	0.00544146	0.00469554	0.00471949	0.0015171	0.0026	0.000309718	0.0128205	0.00788994	0	0	0	0	0	0	0	0	0	0.00370364	0	0	0	0	0
k__Bacteria; p__Firmicutes; c__Clostridia; o__Clostridiales; f__; g__; s__	1214	0.898961	-4.07845	0.000161514	0.00272863	0.000400962	0.00947343	0	0	0.000540361	0.00144463	0	0.000276208	0	0	0	0	0	0	0	0	0	0	0	0	0	0	0	0.00123455	0	0	0.0342376	0	0
k__Bacteria; p__Firmicutes; c__Clostridia; o__Clostridiales; f__; g__; s__	1215	0.746609	-4.23716	3.94583e-05	0.000744132	0.000147639	0.00231787	0	0	0	0	0	0.000552416	0	0	0	0	0	0	0	0	0	0.00836377	0.00130995	0	0	0	0	0	0	0	0	0	0
k__Bacteria; p__Firmicutes; c__Clostridia; o__Clostridiales; f__; g__; s__	1216	0.00139711	2.35611	0.0240738	0.00470205	0.0194777	0.0131946	0.0154871	0.00875427	0.000540361	0.0180578	0.0186155	0.0229253	0.0115037	0.015171	0.0173333	0.00867211	0.041958	0.036491	0.0733395	0.0481848	0.00262099	0.0473947	0	0	0	0	0	0.0111109	0	0	0	0	0
k__Bacteria; p__Firmicutes; c__Clostridia; o__Clostridiales; f__; g__; s__	1217	0.55066	-0.573398	0.0271069	0.0403358	0.0164062	0.0366647	0.0271024	0.0612799	0.00351235	0.0122793	0.0111693	0.0350784	0.0159283	0.0328704	0.0228222	0.0244677	0.025641	0.0433946	0.0127547	0.0511963	0.127118	0.0446068	0.102176	0.0332751	0.0103986	0.0164917	0.0390677	0.00699577	0.0375135	0.00647124	0.0554324	0.0151701	0.0296483
k__Bacteria; p__Firmicutes; c__Clostridia; o__Clostridiales; f__; g__; s__	1218	0.0153234	#NUM!	0	0.00178853	0	0.00192246	0	0	0	0	0	0	0	0	0	0	0	0	0	0	0	0	0.00261989	0.00237679	0.00123793	0.00274862	0.00465092	0.000411516	0	0.00431416	0.00489109	0	0
k__Bacteria; p__Firmicutes; c__Clostridia; o__Clostridiales; f__; g__; s__	1219	0.493196	1.21404	0.000592189	0.00025527	0.00117146	0.000537975	0	0	0	0	0.000286393	0.000276208	0.000884904	0.000505699	0.00231111	0.00402634	0	0	0	0	0	0	0	0.0011884	0	0.000499749	0	0	0	0	0.00163036	0	0
k__Bacteria; p__Firmicutes; c__Clostridia; o__Clostridiales; f__; g__; s__	1220	0.00349216	-5.70597	0.000852026	0.0444755	0.00213727	0.0596985	0	0	0	0.000361157	0	0.0069052	0	0	0	0	0.004662	0	0	0	0.00393149	0	0.00130995	0	0.142362	0.0309844	0.0942586	0.000411516	0.183154	0.03694	0.0228251	0.0533568	0.00864742
k__Bacteria; p__Firmicutes; c__Clostridia; o__Clostridiales; f__; g__; s__	1221	0.0712928	#NUM!	0	0.00761105	0	0.00993722	0	0	0	0	0	0	0	0	0	0	0	0	0	0	0	0	0	0	0.00817036	0.0097451	0.0269753	0	0.0220668	0	0	0.0109852	0.0210009
k__Bacteria; p__Firmicutes; c__Clostridia; o__Clostridiales; f__; g__; s__	1222	0.0341146	0.0468442	0.0023565	0.00228121	0.00186059	0.00569643	0	0	0.00162108	0.00144463	0.0037231	0.00138104	0.00324465	0.000505699	0.00404444	0.00309718	0.002331	0.00690369	0.00318867	0.00150577	0	0.0195155	0	0.0011884	0	0	0.000310061	0.00864183	0	0	0	0	0
k__Bacteria; p__Firmicutes; c__Clostridia; o__Clostridiales; f__; g__; s__	1223	0.0209979	1.5083	0.00245164	0.000861813	0.00356204	0.00273399	0.0116153	0.00875427	0.00027018	0.000722314	0.00229114	0.00110483	0.00501445	0.0010114	0.00144444	0.000929155	0.0011655	0	0	0	0	0	0	0	0.000495173	0.000499749	0	0	0	0.000269635	0	0.00993901	0
k__Bacteria; p__Firmicutes; c__Clostridia; o__Clostridiales; f__; g__; s__	1224	0.000458554	4.8573	0.00805141	0.000277766	0.00744816	0.000787766	0.0193588	0.00875427	0.00243162	0.00325041	0.00257753	0.00745762	0.00383458	0.00556269	0.00693333	0.00650409	0.0034965	0.0108487	0.0286981	0.00301155	0	0.00278792	0	0	0	0	0	0.000823032	0	0	0	0	0
k__Bacteria; p__Firmicutes; c__Clostridia; o__Clostridiales; f__; g__; s__	1225	0.000458554	5.06756	0.0215748	0.000643367	0.0143284	0.00231969	0.0271024	0.00875427	0.00729487	0.0133628	0.00544146	0.0488888	0.0224176	0.0116311	0.0288889	0.0356176	0.0477855	0.0108487	0.0159434	0.0180693	0	0.00836377	0	0	0	0	0	0	0	0	0	0	0
k__Bacteria; p__Firmicutes; c__Clostridia; o__Clostridiales; f__; g__; s__	1226	0.000497244	-4.63191	0.00479861	0.118976	0.00705331	0.188478	0	0.0262628	0.00162108	0.00758429	0.000286393	0.00414312	0.00265471	0.00809119	0.000288889	0.000309718	0	0.00690369	0	0.00903465	0.13105	0.0278792	0.0510879	0.0190143	0.0336718	0.0667165	0.674693	0.0172837	0.339828	0.0150995	0.0586931	0.0177856	0.0938863
k__Bacteria; p__Firmicutes; c__Clostridia; o__Clostridiales; f__; g__; s__	1227	0.00288348	2.68212	0.0151657	0.00236301	0.0128985	0.005795	0.0193588	0	0.00243162	0.00902892	0.00715982	0.00607658	0.0109138	0.0187109	0.00606666	0.0306621	0.00815851	0.0473396	0.0223207	0.0240924	0	0.0167275	0	0	0	0	0	0.0139915	0	0	0	0	0
k__Bacteria; p__Firmicutes; c__Clostridia; o__Clostridiales; f__; g__; s__	1228	0.2764	#DIV/0!	0.000288188	0	0.000555791	0	0	0	0	0.000722314	0	0	0.00147484	0	0.000288889	0.00154859	0	0	0	0	0	0	0	0	0	0	0	0	0	0	0	0	0
k__Bacteria; p__Firmicutes; c__Clostridia; o__Clostridiales; f__; g__; s__	1229	0.000458554	-8.19109	2.57969e-05	0.0075393	9.65232e-05	0.00630968	0	0	0	0.000361157	0	0	0	0	0	0	0	0	0	0	0.00524198	0.00557585	0.00130995	0.0225795	0.00148552	0.0104947	0.015193	0.000411516	0.00662003	0.00431416	0.0130429	0.00680037	0.00494138
k__Bacteria; p__Firmicutes; c__Clostridia; o__Clostridiales; f__; g__; s__	1230	0.011125	#DIV/0!	0.00279481	0	0.00317234	0	0	0	0.000540361	0.00216694	0	0.00883866	0.000884904	0.00505699	0.00231111	0.00712352	0.00582751	0	0.00637735	0	0	0	0	0	0	0	0	0	0	0	0	0	0
k__Bacteria; p__Firmicutes; c__Clostridia; o__Clostridiales; f__; g__; s__	1231	0.00840891	-7.15152	1.97291e-05	0.00280498	7.38197e-05	0.00415788	0	0	0	0	0	0.000276208	0	0	0	0	0	0	0	0	0.0013105	0	0.00261989	0.00237679	0.00272345	0.000749623	0	0.000411516	0	0.00674087	0	0.00470795	0.0148241
k__Bacteria; p__Firmicutes; c__Clostridia; o__Clostridiales; f__; g__; s__	1232	0.0492719	#DIV/0!	0.0020528	0	0.0027372	0	0	0	0	0.0050562	0	0.00939107	0.00353961	0.0020228	0.00231111	0.0034069	0	0	0	0.00301155	0	0	0	0	0	0	0	0	0	0	0	0	0
k__Bacteria; p__Firmicutes; c__Clostridia; o__Clostridiales; f__; g__; s__	1233	0.174404	-0.75427	0.0528947	0.0892216	0.0372746	0.180679	0.0348459	0.0175085	0.0280988	0.0935396	0.0650111	0.070433	0.0926199	0.0389388	0.0548889	0.0613242	0.016317	0.00295873	0.0255094	0.138531	0.0196574	0.29552	0.0864565	0.0213911	0	0.000999498	0.0182936	0.628385	0.0132401	0	0.0635842	0	0.0123535
k__Bacteria; p__Firmicutes; c__Clostridia; o__Clostridiales; f__; g__; s__	1234	0.0712928	#NUM!	0	0.00258238	0	0.00499963	0	0	0	0	0	0	0	0	0	0	0	0	0	0	0	0	0	0.00237679	0	0.00124937	0.00496098	0	0.0176534	0.000808904	0.00652146	0	0
k__Bacteria; p__Firmicutes; c__Clostridia; o__Clostridiales; f__; g__; s__	1235	0.649791	-2.10156	0.000167767	0.000720011	0.000418274	0.00134415	0	0	0.00027018	0	0.000572785	0	0	0	0	0	0	0	0	0.00150577	0.00262099	0.00278792	0	0	0.000247587	0	0	0.00370364	0	0	0	0	0
k__Bacteria; p__Firmicutes; c__Clostridia; o__Clostridiales; f__; g__; s__	1236	0.779203	-4.23033	2.10691e-05	0.000395459	7.88335e-05	0.00135253	0	0	0	0	0	0	0.000294968	0	0	0	0	0	0	0	0	0	0	0	0	0.000249874	0	0	0	0	0.00489109	0	0
k__Bacteria; p__Firmicutes; c__Clostridia; o__Clostridiales; f__; g__; s__	1237	0.000458554	9.45398	0.0222012	3.16551e-05	0.0135505	0.000114134	0.0309741	0.0175085	0.00729487	0.0111959	0.00658703	0.0469554	0.0241874	0.0182052	0.0372667	0.0148665	0.025641	0.00591745	0.0446414	0.0195751	0	0	0	0	0	0	0	0.000411516	0	0	0	0	0
k__Bacteria; p__Firmicutes; c__Clostridia; o__Clostridiales; f__; g__; s__	1238	0.00060338	5.63468	0.0138003	0.000277766	0.01027	0.000787766	0.00774353	0.0262628	0.0027018	0.0119182	0.00687342	0.0165725	0.0147484	0.0146653	0.0158889	0.0102207	0.0151515	0.0414222	0	0.00903465	0	0.00278792	0	0	0	0	0	0.000823032	0	0	0	0	0
k__Bacteria; p__Firmicutes; c__Clostridia; o__Clostridiales; f__; g__; s__	1239	0.00502736	#DIV/0!	0.0020912	0	0.00352645	0	0	0	0.00027018	0.000361157	0	0	0.00117987	0.0020228	0.00173333	0.00185831	0.0011655	0.00394497	0.00318867	0.013552	0	0	0	0	0	0	0	0	0	0	0	0	0
k__Bacteria; p__Firmicutes; c__Clostridia; o__Clostridiales; f__; g__; s__	1240	0.000514711	#DIV/0!	0.00903546	0	0.00741684	0	0.0232306	0	0.00513343	0.00325041	0.000859178	0.021268	0.000294968	0.00758549	0.0132889	0.00557493	0.00815851	0.00986242	0.0159434	0.0120462	0	0	0	0	0	0	0	0	0	0	0	0	0
k__Bacteria; p__Firmicutes; c__Clostridia; o__Clostridiales; f__; g__; s__	1241	0.00403061	1.28102	0.0857155	0.0352724	0.0331086	0.0411253	0.0696918	0.0350171	0.0229653	0.0642859	0.0887817	0.139761	0.0766916	0.0935544	0.0722222	0.0922961	0.0885781	0.118349	0.133924	0.103898	0.0471778	0.164487	0.0261989	0.0534778	0.0267394	0.0107446	0.0244948	0.024691	0.0110334	0.00647124	0.0260858	0.024586	0.0123535
k__Bacteria; p__Firmicutes; c__Clostridia; o__Clostridiales; f__; g__; s__	1242	0.00461852	0.556809	0.0378768	0.0257488	0.0210839	0.0732156	0.0309741	0.0437713	0.00324217	0.0101124	0.0638656	0.0243063	0.0716772	0.0556269	0.0268667	0.0377856	0.0559441	0.0138074	0.0350754	0.0572194	0.267341	0.0167275	0	0	0	0.000499749	0	0.0283946	0.00220668	0	0.0195644	0	0
k__Bacteria; p__Firmicutes; c__Clostridia; o__Clostridiales; f__; g__; s__	1243	0.520786	-3.35793	0.0001692	0.00173475	0.000341012	0.00339194	0	0	0	0	0	0	0.000294968	0	0.000288889	0.000619437	0.0011655	0	0	0	0	0.00278792	0	0.00950717	0	0.000499749	0.000930184	0	0.00882671	0	0	0	0
k__Bacteria; p__Firmicutes; c__Clostridia; o__Clostridiales; f__; g__; s__	1244	0.000967903	#DIV/0!	0.00587635	0	0.00604156	0	0.0154871	0.0175085	0.000540361	0.011557	0.000572785	0.0035907	0.00206477	0.00404559	0.0052	0.0111499	0	0.000986242	0.00956602	0	0	0	0	0	0	0	0	0	0	0	0	0	0
k__Bacteria; p__Firmicutes; c__Clostridia; o__Clostridiales; f__; g__; s__	1245	0.2764	-1.99197	0.00485272	0.0193032	0.00883428	0.0324466	0	0	0	0.00144463	0	0.00662899	0.00176981	0.00404559	0.0052	0.0034069	0.004662	0.00295873	0.00318867	0.0346328	0.0458674	0.00278792	0	0.00475359	0.0235207	0.0359819	0.115343	0.00411516	0.00662003	0.00053927	0.0114125	0	0
k__Bacteria; p__Firmicutes; c__Clostridia; o__Clostridiales; f__; g__; s__	1246	0.39943	0.235609	0.00482858	0.00410104	0.00964196	0.0130517	0	0	0.00351235	0.00433388	0.0177563	0.000276208	0.0339213	0	0	0	0.00582751	0.00197248	0	0	0	0.0473947	0	0.00237679	0	0.000249874	0	0.00329213	0	0	0	0	0
k__Bacteria; p__Firmicutes; c__Clostridia; o__Clostridiales; f__; g__; s__	1247	0.010871	3.89494	0.0031903	0.000214456	0.00344187	0.000773231	0.00774353	0	0.0013509	0.0025281	0	0.00303829	0	0.0015171	0.000577778	0.00464578	0.004662	0	0.00956602	0.00903465	0	0.00278792	0	0	0	0	0	0	0	0	0	0	0
k__Bacteria; p__Firmicutes; c__Clostridia; o__Clostridiales; f__; g__; s__	1248	0.0939245	3.90355	0.000602188	4.02389e-05	0.000950417	0.000145083	0	0	0	0.00108347	0.000286393	0.00276208	0.000294968	0.0025285	0	0.000309718	0.0011655	0	0	0	0	0	0	0	0	0	0	0	0	0	0	0.000523106	0
k__Bacteria; p__Firmicutes; c__Clostridia; o__Clostridiales; f__; g__; s__	1249	0.00266011	-5.0788	0.000337872	0.0114188	0.000915584	0.0121386	0	0	0	0.000722314	0.00343671	0.000276208	0.000294968	0	0	0	0	0	0	0	0.0170364	0	0.00523979	0.011884	0.00148552	0.0107446	0.0300759	0.000411516	0.0176534	0.00862831	0	0.00575416	0.0395311
k__Bacteria; p__Firmicutes; c__Clostridia; o__Clostridiales; f__; g__; s__	1250	0.00221618	#DIV/0!	0.00715455	0	0.00870733	0	0	0	0.0027018	0.0213083	0.00572785	0.0143628	0.00353961	0.0293306	0.000866666	0.00588465	0.00699301	0.00493121	0	0.00451732	0	0	0	0	0	0	0	0	0	0	0	0	0
k__Bacteria; p__Firmicutes; c__Clostridia; o__Clostridiales; f__; g__; s__	1251	0.047746	1.15641	0.00263675	0.00118291	0.00404596	0.00384704	0.00387177	0	0.00027018	0.00433388	0.014606	0	0.000294968	0	0.000288889	0.00216803	0.0011655	0.00690369	0	0.00301155	0	0.0139396	0	0.0011884	0	0.000249874	0	0	0	0	0	0	0
k__Bacteria; p__Firmicutes; c__Clostridia; o__Clostridiales; f__; g__; s__	1252	0.206077	1.59231	0.000646653	0.000214456	0.00115255	0.000773231	0	0	0	0.00108347	0.000286393	0.00414312	0.000589936	0	0.00144444	0	0	0	0	0.00150577	0	0.00278792	0	0	0	0	0	0	0	0	0	0	0
k__Bacteria; p__Firmicutes; c__Clostridia; o__Clostridiales; f__; g__; s__	1253	0.038126	4.81218	0.00177862	6.33101e-05	0.00194483	0.000228268	0.00387177	0	0.000810541	0	0.00343671	0.00193346	0.00147484	0	0.00491111	0	0	0.00394497	0	0.00451732	0	0	0	0	0	0	0	0.000823032	0	0	0	0	0
k__Bacteria; p__Firmicutes; c__Clostridia; o__Clostridiales; f__; g__; s__	1254	0.16748	#DIV/0!	0.000579113	0	0.00102531	0	0	0	0	0	0.000572785	0.00248587	0.000884904	0	0.00317778	0	0	0.000986242	0	0	0	0	0	0	0	0	0	0	0	0	0	0	0
k__Bacteria; p__Firmicutes; c__Clostridia; o__Clostridiales; f__; g__; s__	1255	0.011125	#DIV/0!	0.00215258	0	0.00435331	0	0	0	0.00108072	0.000722314	0.000286393	0.00138104	0	0.0020228	0.000866666	0.000929155	0	0.00690369	0.0159434	0	0	0	0	0	0	0	0	0	0	0	0	0	0
k__Bacteria; p__Firmicutes; c__Clostridia; o__Clostridiales; f__; g__; s__	1256	0.0341146	#NUM!	0	0.0033495	0	0.00424327	0	0	0	0	0	0	0	0	0	0	0	0	0	0	0.00393149	0	0	0.00237679	0	0.00749623	0.00217043	0	0.0132401	0	0.00815182	0	0.00617673
k__Bacteria; p__Firmicutes; c__Clostridia; o__Clostridiales; f__; g__; s__	1257	0.520786	-4.07482	0.00420626	0.0708825	0.00603746	0.161089	0.0154871	0	0	0	0.00801899	0.0127056	0	0	0.000288889	0	0	0.0128211	0.00956602	0	0.0157259	0	0.00523979	0.0855645	0	0	0.20185	0.0415631	0.571529	0	0	0	0
k__Bacteria; p__Firmicutes; c__Clostridia; o__Clostridiales; f__; g__; s__	1258	0.00647832	1.87599	0.00449733	0.00122525	0.00551699	0.00323261	0	0.0175085	0.000540361	0.00216694	0.000859178	0.00248587	0.000884904	0.0030342	0.00144444	0.000929155	0.002331	0.0108487	0.00637735	0.013552	0	0.0111517	0	0	0	0.000249874	0	0.00452667	0	0	0	0	0
k__Bacteria; p__Firmicutes; c__Clostridia; o__Clostridiales; f__; g__; s__	1259	0.0271866	-1.90199	0.199201	0.74447	0.305033	0.950906	0	0	0.0815945	0.0960677	0.897841	0.0522033	0.0129786	0.172443	0.0823333	0.00123887	0.20979	0.302776	0.00318867	0.876361	0.568755	0.0167275	0.222691	0.120028	0.50681	0.760618	2.16485	0.0572007	3.32105	0.462963	0.278792	0.82703	0.370604
k__Bacteria; p__Firmicutes; c__Clostridia; o__Clostridiales; f__; g__; s__	1260	0.0646966	1.04582	0.00968117	0.00468926	0.00720362	0.00800019	0.00774353	0	0.000810541	0.0126405	0.0100237	0.00939107	0.0171081	0.0176995	0.0078	0.00929155	0.0174825	0.00295873	0	0.0225866	0.00524198	0	0.00654973	0.00594198	0	0	0.000310061	0.0106994	0.0286868	0.000269635	0.00326073	0	0
k__Bacteria; p__Firmicutes; c__Clostridia; o__Clostridiales; f__; g__; s__	1261	0.0153234	1.83044	0.00877347	0.00246691	0.0109085	0.00768197	0.00387177	0	0.00189126	0.00541735	0.00429589	0.014639	0.0280219	0.00809119	0.00953333	0.036237	0.00932401	0	0	0.00150577	0	0.0278792	0.00130995	0	0	0	0	0.00288061	0	0	0	0	0
k__Bacteria; p__Firmicutes; c__Clostridia; o__Clostridiales; f__; g__; s__	1262	0.798659	#DIV/0!	0.000227762	0	0.000852209	0	0	0	0	0	0	0	0	0	0	0	0	0	0.00318867	0	0	0	0	0	0	0	0	0	0	0	0	0	0
k__Bacteria; p__Firmicutes; c__Clostridia; o__Clostridiales; f__; g__; s__	1263	0.239594	-0.611624	0.00527906	0.0080663	0.00596704	0.007535	0.0116153	0	0.00621415	0.00686198	0.00630064	0.00110483	0.00117987	0.0015171	0.00202222	0.0222997	0.002331	0.00493121	0	0.00752887	0.00262099	0.0167275	0.0117895	0.0237679	0.00272345	0.00349824	0.00682135	0.0193412	0.00220668	0.00188744	0.00326073	0.00156932	0.00864742
k__Bacteria; p__Firmicutes; c__Clostridia; o__Clostridiales; f__; g__; s__	1264	0.0021887	3.84913	0.00627942	0.000435728	0.00497072	0.000966232	0.00774353	0	0.0027018	0.0050562	0.000572785	0.00414312	0.00707923	0.00809119	0.0078	0.0117693	0.004662	0.0177524	0	0.0105404	0	0.00278792	0	0.00237679	0	0.000499749	0	0	0	0	0	0	0
k__Bacteria; p__Firmicutes; c__Clostridia; o__Clostridiales; f__; g__; s__	1265	0.0787326	4.98497	0.0203744	0.000643367	0.0319423	0.00231969	0.0696918	0.0350171	0.00027018	0.105097	0.0315032	0	0	0	0	0	0.020979	0.0226836	0	0	0	0.00836377	0	0	0	0	0	0	0	0	0	0	0
k__Bacteria; p__Firmicutes; c__Clostridia; o__Clostridiales; f__; g__; s__	1266	0.0010873	6.85629	0.0048063	4.14823e-05	0.00519889	0.000149566	0	0	0.000810541	0.00216694	0.00171836	0.0121532	0.00324465	0.0156767	0.00346667	0.00123887	0.004662	0.00788994	0.0127547	0.00150577	0	0	0	0	0	0	0	0	0	0.00053927	0	0	0
k__Bacteria; p__Firmicutes; c__Clostridia; o__Clostridiales; f__; g__; s__	1267	0.0787326	1.44318	0.00372067	0.0013683	0.00370465	0.00304279	0.00387177	0	0.00027018	0.00325041	0.0117421	0.0069052	0.00619432	0.0010114	0.00751111	0.00495549	0	0	0.00637735	0	0.010484	0	0	0	0	0	0.000620122	0.00452667	0	0.00215708	0	0	0
k__Bacteria; p__Firmicutes; c__Clostridia; o__Clostridiales; f__; g__; s__	1268	0.000458554	6.27504	0.0182141	0.000235197	0.011392	0.000770611	0.0387177	0.0175085	0.0027018	0.0126405	0.0040095	0.034526	0.0256622	0.0106197	0.0254222	0.0275649	0.013986	0.0226836	0.0159434	0.00301155	0	0.00278792	0	0	0	0	0	0	0	0.000269635	0	0	0
k__Bacteria; p__Firmicutes; c__Clostridia; o__Clostridiales; f__; g__; s__	1269	0.047746	-0.0676577	0.00433194	0.00453994	0.00713438	0.0154156	0	0	0.000540361	0.00577851	0.000572785	0.00276208	0	0.0136539	0.00404444	0.000309718	0	0.00295873	0.0255094	0.00451732	0	0.0557585	0	0	0	0	0	0	0	0	0.00326073	0	0
[truncated: 2,239 more rows]

## Sheet: SR vs. SA
QIIME Taxanomic Assignment	O.T.U. number	FDR	SR/SA Log2 fold change	SR Average	SA Average	SR STDEV	SA STDEV	SR5	SR6	SR8	SR9	SR10	SR13	SR14	SR19	SR21	SR22	SR25	SR27	SR29	SR30	SA1	SA2	SA3	SA4	SA12	SA15	SA16	SA17	SA20	SA23	SA24	SA26	SA28		OTU	Wilcoxon_P	Wil_FDR
[truncated: 3,508 more rows]

[truncated: 3 more sheets: LRA vs. LAA, SRA vs. SAA, all samples]
