# Supplementary material for: Illumina MiSeq Phylogenetic Amplicon Sequencing Shows a Large Reduction of an Uncharacterised Succinivibrionaceae and an Increase of the Methanobrevibacter gottschalkii Clade in Feed Restricted Cattle
Source: PLoS One. 2015 Jul 30;10(7):e0133234. doi: 10.1371/journal.pone.0133234 (PMC4520551; doi:10.1371/journal.pone.0133234)
Supplement: S5 Table — Methanobacteria/Microbia OTUs = M1-M20, Thermoplasmata OTUs = T21-T27 and Prevotella OTUs = P499-P825. P values shown as 0 are <1x10-20. (XLSX) [file pone.0133234.s005.xlsx]

## Sheet: Liquid Spearman rho value
O.T.U#	M1	M2	M3	M4	M5	M6	M7	M8	M9	M10	M11	M12	M13	M14	M15	M16	M17	M18	M19	M20	T21	T22	T23	T24	T25	T26	T27
P499	-0.181522	0.0292798	0.0313556	0.171128	0.0566257	-0.0678531	-0.0327884	-0.0345453	-0.075405	0.0226546	-0.0163404	-0.0786534	-0.000456423	-0.155081	-0.054879	0.0752387	-0.114615	0.0323958	0.0248873	-0.0718112	-0.063583	0.0299838	-0.234008	0.0914958	-0.0641827	0.0967222	0.0755862
P500	0.421474	-0.333899	0.211835	-0.0947122	0.0983204	0.289489	0.586523	0.33845	0.213263	0.0475845	0.0363175	0.103555	-0.0637554	-0.116568	-0.258465	0.10549	0.542762	-0.173942	-0.371375	0.00433272	-0.00915234	0.184284	0.314284	-0.136637	-0.177811	-0.610324	0.410127
P501	0.0203882	-0.147022	-0.0826718	-0.168558	-0.177275	0.106903	-0.00594236	-0.138201	0.123488	0.0522729	0.021713	0.0969692	0.106385	0.0729811	0.0551539	-0.246324	-0.015095	-0.16728	-0.0492482	-0.053691	0.0526743	0.103522	-0.0684169	-0.0734111	0.235679	0.0354854	-0.119809
P502	0.312555	-0.202255	0.0995409	-0.150867	0.197238	0.309738	0.613334	0.449842	0.338465	0.00208227	0.100797	0.284677	-0.129665	-0.0976106	0.00823936	0.13739	0.359257	-0.269007	-0.385536	0.0314243	-0.0491326	0.222337	0.190908	-0.0680533	-0.13496	-0.586064	0.39633
P503	0.455064	-0.142746	0.0694247	-0.0613328	0.13956	0.303231	0.437245	0.357014	0.442368	0.107412	0.342893	0.369213	0.148343	-0.036726	-0.149922	0.201803	0.508139	0.0531158	-0.31553	-0.10686	0.0243276	0.209926	0.0433832	-0.026228	-0.0859012	-0.456726	0.405668
P504	-0.0580972	-0.0671463	-0.143229	-0.0251807	0.0646476	0.105906	0.193145	0.134657	0.150477	0.0562171	-0.00607955	0.12011	0.0405902	-0.0951203	0.0722837	0.00695052	-0.0779256	-0.167507	-0.00608131	0.12139	0.204873	0.231693	-0.087657	0.00317719	-0.00158415	-0.0709443	0.176419
P505	0.0766446	0.0313468	0.0343323	-0.0940313	0.0636591	0.107699	0.317451	0.264956	0.173335	-0.0501803	0.0158389	0.138432	-0.0286915	-0.177771	-0.103565	0.131561	0.206294	-0.0182007	-0.160459	-0.0338628	0.0779843	0.222779	0.0120977	-0.0178804	-0.25286	-0.337548	0.207628
P506	0.188815	-0.0794743	0.13936	-0.0966769	0.25234	0.21148	0.557446	0.348178	0.185504	-0.119119	0.178538	0.0704561	-0.10277	-0.0347835	0.0746808	0.151229	0.216517	-0.142692	-0.224135	0.0159348	0.200524	0.187095	0.0269024	-0.0640886	-0.295926	-0.430127	0.296422
P507	0.00593503	-0.00275028	0.0404281	0.160273	0.10824	0.00818866	0.0310036	-0.0143634	0.0276791	-0.0164224	0.067396	0.100447	0.0165628	0.110253	0.0498945	0.0568289	-0.0406177	0.0847069	0.169114	0.136169	0.104563	0.154433	0.0591304	-0.0615364	-0.0997304	0.043012	-0.0551267
P508	0.23238	-0.176964	-0.00842502	-0.135765	0.150144	0.101306	0.232105	0.264017	0.178139	-0.064335	0.272782	0.0999207	0.0428647	0.0191084	-0.0521593	0.113165	0.24954	0.0621498	-0.237991	-0.00379786	-0.0584601	-0.0137605	0.123856	0.00585895	-0.217251	-0.314654	0.315085
P509	-0.155326	0.197953	-0.00423747	0.0559603	-0.0356061	-0.181007	-0.23471	-0.143779	-0.174915	-0.0941144	-0.0028423	-0.0024655	-0.127352	-0.121989	-0.0299772	0.240926	-0.0315672	0.0513676	0.268885	0.00116643	0.000479596	-0.00549503	0.0641631	0.12615	-0.0810162	0.147845	-0.0285863
P510	0.298079	-0.0408208	0.169067	-0.0362335	0.249681	0.116028	0.439734	0.384737	0.197954	-0.123241	0.354599	0.290793	0.09547	-0.0113748	-0.0525648	0.328657	0.373115	-0.0682883	-0.204678	0.056168	-0.0415835	0.1677	0.122057	0.0855506	-0.337586	-0.428089	0.366259
P511	0.0226319	0.107704	0.0911179	-0.0570526	0.153053	0.171752	0.269336	0.130183	0.214357	0.0447352	-0.0224846	0.157935	-0.125346	0.0149546	0.0368617	0.0467832	0.0962145	-0.0938216	-0.250359	-0.0522317	-0.244842	0.111763	-0.0465037	-0.0772787	-0.0622465	-0.258506	0.172899
P512	0.522299	-0.197325	0.338926	-0.00860538	0.265489	0.318161	0.587045	0.392763	0.261324	-0.104999	0.160159	0.20443	-0.0424225	-0.183758	-0.108958	0.19348	0.642152	-0.084247	-0.416834	-0.0296934	-0.0805506	0.128705	0.253504	-0.209708	-0.147403	-0.655259	0.458291
P513	0.405601	-0.120286	0.31511	-0.0686124	0.13363	0.245288	0.456512	0.280285	0.269	-0.0450439	0.142624	0.146518	-0.0369439	-0.183754	-0.137989	0.153466	0.544072	-0.0559	-0.232989	-0.0985839	-0.244279	0.176763	0.24229	-0.122201	-0.0795817	-0.576853	0.275054
P514	-0.0348413	-0.096371	0.024325	-0.138759	0.0811187	0.154232	0.088024	0.123077	0.00435482	-0.0361338	-0.0776976	-0.158209	-0.107049	0.051964	0.00924646	-0.0272402	0.0283556	-0.00332557	-0.103411	0.100282	0.121716	0.0721739	-0.00641503	-0.0801337	-0.0992361	-0.0365334	-0.0660283
P515	0.0369928	0.0645903	-0.116722	0.0280305	0.14171	0.134389	-0.0755432	0.16207	0.218709	0.123251	0.393863	0.251027	0.307127	0.0517352	0.121647	0.0356013	-0.0196	0.17911	0.0522682	0.00138012	-0.0434917	0.206299	-0.160088	0.120643	-0.210745	0.144497	0.0321858
P516	0.168169	-0.158687	0.0919607	0.0744487	0.0162336	0.14515	0.124901	0.0829969	0.284423	0.146278	0.428011	0.384042	0.260364	-0.0633129	-0.0615692	0.220675	0.247153	0.159112	-0.12649	-0.00901189	0.0200815	0.223804	-0.128772	0.208008	-0.156316	-0.226679	0.167747
P517	-0.19193	-0.0917056	-0.0944752	-0.163499	0.0263788	-0.0237863	0.00218254	0.183177	0.235391	0.227493	-0.036828	0.213877	0.188372	-0.0909585	0.154327	0.0267497	-0.205711	-0.0491595	-0.053934	-0.0369216	0.206271	0.0956697	-0.0838218	0.0885836	0.0598117	0.146704	0.0310625
P518	0.418141	-0.208167	0.10551	-0.230102	0.163764	0.35905	0.652648	0.385433	0.270108	0.0239792	0.182065	0.149775	0.0439597	0.0326204	0.0296734	0.193476	0.403453	-0.221133	-0.330414	0.105427	0.0794095	0.206089	0.14045	-0.150486	-0.167398	-0.515172	0.449897
P519	0.202046	-0.143128	-0.094928	-0.109161	0.0396196	0.238174	0.125307	0.158233	0.355681	0.187368	0.253448	0.31531	0.186791	-0.0862514	0.0502201	0.0726718	0.171245	0.035285	-0.261536	0.0242868	-0.087793	0.237087	0.0657486	0.073958	-0.0624469	-0.0942637	0.228198
P520	0.236988	-0.279341	0.0705605	-0.173427	0.0884536	0.197069	0.373551	0.456387	0.397044	0.200147	0.19966	0.262278	0.110197	-0.0607443	-0.0196299	0.0927252	0.421836	-0.108916	-0.3111	-0.0527293	0.188547	0.157058	0.0449512	-0.0758888	-0.18255	-0.392564	0.342063
P521	0.443737	-0.0521483	0.246933	-0.0991055	0.179626	0.173611	0.614327	0.272613	0.203237	-0.191818	0.163735	0.0971429	-0.0948895	-0.180414	-0.0579875	0.283758	0.502783	-0.264922	-0.183663	0.00472131	0.00913192	0.262662	0.239148	-0.0803233	-0.21575	-0.485625	0.254793
P522	0.335105	-0.188141	0.12722	-0.05682	0.111895	0.232528	0.459693	0.350591	0.336531	0.0667767	0.259147	0.364636	0.102646	0.0988626	-0.0447587	0.290214	0.428654	-0.0326006	-0.258167	0.102144	0.0648282	0.38635	0.215207	0.0600648	-0.247305	-0.324042	0.336206
P523	0.183872	-0.148396	0.1759	0.0486079	-0.0400921	-0.123061	0.0275939	0.0223389	0.0909756	-0.123909	-0.0680193	0.0131511	-0.12885	-0.0436158	-0.00902755	0.237723	0.146178	-0.0170529	0.124481	-0.143952	-0.118137	0.150289	0.442089	0.0431042	0.039865	-0.112755	-0.0329268
P524	0.371055	-0.237601	0.0880704	-0.129458	0.140564	0.0746071	0.453673	0.361411	0.155637	-0.0083376	0.164721	0.170336	-0.120191	-0.0854334	-0.230655	0.208713	0.405762	-0.10694	-0.208666	0.176228	0.0239492	0.226806	0.239202	-0.0248887	-0.253281	-0.516824	0.36729
P525	0.465629	-0.293595	0.107143	-0.176198	0.124552	0.20686	0.579447	0.426163	0.269367	-0.0942154	0.124502	0.128842	-0.0293667	-0.132982	-0.0796703	0.226173	0.597967	-0.109858	-0.311645	0.0226091	0.0857885	0.213848	0.193317	-0.121083	-0.130766	-0.52453	0.451722
P526	0.160382	-0.229918	0.00398625	0.0754424	-0.0258947	0.162746	0.0425554	-0.0868512	0.168781	-0.0915534	0.0931801	0.129242	0.0115247	0.0169527	-0.0371633	-0.0197197	0.152033	0.0732016	-0.110591	0.115354	0.0496432	0.102038	-0.0610714	-0.0728449	-0.0910034	-0.0556766	0.152881
P527	0.368772	-0.0734703	0.199781	-0.0630368	0.13287	0.267386	0.499011	0.236811	0.334222	-0.0548627	0.155198	0.0956701	-0.053499	-0.0973298	0.0301174	0.126953	0.357352	-0.12635	-0.26895	0.0238835	-0.187304	0.247932	0.243151	-0.000459401	-0.0952373	-0.51485	0.24312
P528	0.655095	-0.298111	0.138233	-0.113551	0.106015	0.308715	0.525116	0.372262	0.334249	0.0112517	0.135303	0.237001	-0.0142407	-0.146646	-0.157744	0.159988	0.791077	0.00486448	-0.318456	-0.0988342	-0.0626499	0.0896294	0.356809	-0.120315	-0.0939351	-0.581581	0.366211
P529	0.15373	-0.0390728	-0.0339091	-0.187161	0.013988	-0.020576	0.289179	0.164144	0.125659	-0.00635367	0.0323551	0.00466293	-0.07151	-0.084603	0.0192037	0.120727	0.171166	0.0690818	-0.309842	-0.0371062	-0.0494846	0.0152587	0.0661983	-0.0159253	-0.105093	-0.322543	0.239427
P530	0.481111	-0.252882	0.0700271	0.0413237	0.197933	0.234578	0.497802	0.398816	0.267307	0.0352473	0.200982	0.209825	-0.0136708	-0.146646	-0.112451	0.174824	0.637346	-0.144829	-0.326232	-0.076294	-0.0165151	0.145001	0.32332	-0.0756425	-0.0896493	-0.55388	0.355945
P531	-0.00370576	0.117647	-0.0169598	-0.0614311	0.00104558	-0.144563	0.0831328	0.0593381	-0.0835353	0.0696457	0.138811	0.29792	0.0263795	0.181638	-0.0259405	0.143806	-0.0211822	0.210723	0.122991	0.0653236	-0.024116	-0.0115577	-0.0715777	0.0420757	-0.0895634	0.0581488	-0.011802
P532	0.424708	-0.136828	0.151089	-0.0983236	0.0586776	0.142743	0.32186	0.30487	0.287244	-0.0693841	0.0893804	0.0899274	-0.0569931	0.00884128	0.00972631	0.274315	0.528658	-0.0254687	-0.200128	-0.167698	-0.0791085	0.0574492	0.258127	-0.144725	-0.13799	-0.314542	0.208929
P533	0.314678	-0.262821	0.11623	-0.218883	0.105312	0.231882	0.544189	0.247363	0.351723	0.205266	0.200526	0.251576	0.0618301	-0.164589	-0.062671	0.108074	0.34187	-0.145701	-0.401928	0.060379	0.0386248	0.0508823	0.166684	-0.058938	-0.0675155	-0.41744	0.34873
P534	0.513826	-0.245834	0.233229	-0.121759	0.15799	0.230038	0.74923	0.406718	0.256114	-0.0352023	0.114922	0.100437	-0.0935728	-0.217314	-0.214249	0.182939	0.619022	-0.259828	-0.325063	-0.0814243	-0.107619	0.19437	0.391183	-0.153399	-0.170558	-0.665452	0.387046
P535	-0.0968484	0.126949	0.0346915	0.129562	0.0182791	-0.160306	-0.173654	-0.0776022	-0.155501	-0.00974235	0.00162555	-0.127934	0.0670493	0.0416926	0.0588103	-0.0513924	-0.103447	0.112152	0.158161	-0.0895787	-0.011526	-0.0712634	-0.0889167	0.086794	-0.034637	0.139109	-0.215699
P536	0.472089	-0.104726	0.183476	-0.169498	0.318598	0.319926	0.709913	0.331039	0.242052	-0.13985	0.113343	0.192309	-0.105137	0.175789	-0.0817341	0.223006	0.439961	-0.0857716	-0.281556	0.131105	-0.0500001	0.205844	0.242067	-0.0652558	-0.250856	-0.534197	0.396213
P537	0.648467	-0.245335	0.130587	-0.147979	0.147488	0.260043	0.523588	0.403876	0.35081	0.0714198	0.189362	0.216996	-0.0341735	-0.146646	-0.131146	0.16544	0.767096	-0.0672954	-0.321284	-0.176997	-0.0741537	0.105028	0.437848	-0.101734	-0.0647703	-0.584289	0.350131
P538	0.248057	-0.172142	0.0779871	0.154297	-0.04423	0.0162396	0.0360315	0.11747	0.125036	-0.0888693	0.0642414	0.173632	-0.0319635	-0.050595	-0.0420645	0.0474605	0.202091	0.0259595	-0.00823182	-0.0399534	-0.108046	0.123897	0.163206	0.125407	0.105648	-0.14813	0.104433
P539	0.106235	-0.161744	0.107365	-0.153509	0.161132	0.164951	0.42329	0.228327	0.248741	-0.0855717	0.131522	0.199711	0.167123	-0.160265	-0.0849922	0.213589	0.222662	-0.167187	-0.27517	0.00872176	0.0355049	0.155291	0.0375073	0.0116108	-0.175615	-0.473143	0.303652
P540	0.536759	-0.172175	0.292878	-0.0842057	0.205166	0.261204	0.642521	0.34307	0.271608	-0.0904564	0.181283	0.197362	-0.0788764	-0.200489	-0.171407	0.181649	0.609881	-0.134427	-0.418776	-0.023567	-0.122356	0.148649	0.170644	-0.125611	-0.124706	-0.744735	0.463992
P541	0.0403381	-0.0023275	-0.116716	-0.0398287	0.0731379	0.0728909	0.190812	0.159424	0.127867	0.141203	0.0700225	0.0445878	0.0118838	-0.00561898	0.0867486	-0.0471467	-0.00698524	0.105549	-0.143374	0.0351456	-0.0317665	0.0524399	-0.100094	0.0327527	-0.173438	-0.0114996	0.147038
P542	0.0640047	0.00754351	-0.00473348	-0.0975549	-0.0196234	0.120995	0.0699003	0.000329256	0.124685	0.15579	0.0213292	0.10234	-0.0390533	0.0604993	-0.227516	-0.0768973	-0.051323	-0.00984533	-0.0439522	0.0238317	-0.00744935	0.056795	0.10738	-0.116294	0.139241	-0.0427388	-0.106073
P543	0.39644	-0.250186	-0.0320513	-0.0964996	0.205723	0.175783	0.558697	0.396552	0.365103	0.15495	0.106318	0.20982	0.0903388	-0.0189159	-0.055131	0.0411928	0.401502	-0.132196	-0.450129	0.0810805	0.0651375	0.0655955	0.107972	-0.0875788	-0.14939	-0.43371	0.314741
P544	0.354762	-0.166649	0.15123	-0.0377674	0.153989	0.234775	0.529105	0.37015	0.31793	-0.0582621	0.134668	0.177872	-0.0683431	-0.170365	-0.0317963	0.21283	0.514418	-0.130527	-0.39087	-0.118886	-0.0741254	0.13713	0.148644	-0.19777	-0.20232	-0.650178	0.396258
P545	0.221037	-0.228375	-0.0915594	-0.221101	0.0139355	0.143952	0.408633	0.215198	0.409957	0.304021	0.19282	0.319631	0.127279	-0.020345	-0.0626284	0.204689	0.231903	-0.213489	-0.374938	-0.196817	-0.105597	0.175551	0.182737	-0.0719446	-0.118612	-0.330536	0.29517
P546	-0.245625	-0.0149569	-0.174582	-0.160308	-0.0406041	-0.0248344	-0.0188827	-0.0106215	0.117467	0.259214	-0.0103237	0.00931363	0.0360719	0.161508	0.0129058	-0.0586621	-0.28078	-0.0365456	0.0510198	-0.0238045	0.0931947	0.0907268	-0.140096	0.0287272	-0.0587887	0.182861	0.0432301
P547	0.535045	-0.239669	0.319679	-0.0922086	0.243627	0.258958	0.633808	0.261868	0.197493	-0.174736	0.175096	0.176706	-0.132014	-0.167006	-0.166371	0.206353	0.665548	-0.18901	-0.326275	-0.0200624	-0.105581	0.1258	0.335151	-0.147511	-0.176994	-0.647404	0.419273
P548	-0.171112	0.229959	-0.0554192	-0.0909718	0.0452245	0.00226957	-0.0194822	-0.081985	-0.10578	-0.0412235	-0.0835433	-0.0582863	-0.125719	0.170393	0.0496092	-0.0775854	-0.160112	0.0189546	0.0230597	0.0795319	0.0274112	0.0663133	-0.0498253	0.0373751	-0.075218	0.101565	-0.259369
P549	0.608507	-0.162532	0.235035	-0.0981756	0.2364	0.282972	0.663924	0.416942	0.249804	-0.038275	0.177063	0.168428	-0.0869592	-0.183758	-0.246114	0.123264	0.748136	-0.159868	-0.392759	0.0095559	-0.192772	0.134172	0.325757	-0.0116578	-0.219994	-0.691727	0.408778
P550	-0.0812228	0.140464	0.0104202	0.0236035	0.109176	-0.00850181	-0.0621266	-0.0547762	-0.0748759	-0.0282226	-0.0590863	0.0266543	-0.100237	0.149953	0.0952956	0.068742	-0.0361332	0.147501	0.0401027	-0.0775558	-0.0767044	-0.0342772	0.00821506	-0.214796	-0.0473818	0.11129	-0.0377809
P551	0.268463	-0.279487	0.10215	-0.158022	0.232769	0.152658	0.445605	0.361666	0.253915	0.0883414	0.177837	0.221117	0.0547159	-0.127671	-0.104885	0.0772067	0.351504	-0.0512002	-0.386215	0.0353024	0.163552	0.170778	0.163689	-0.158011	-0.154621	-0.510884	0.334887
P552	0.483954	-0.248598	0.238791	-0.178466	0.124351	0.228776	0.664993	0.398038	0.258552	-0.0295556	0.0739595	0.191574	-0.0764301	-0.0841492	-0.262568	0.27785	0.51157	-0.0821692	-0.285634	0.0059957	-0.00622495	0.203988	0.293312	-0.210211	-0.199487	-0.593124	0.456546
P553	0.00806868	-0.0833216	-0.121456	-0.107508	-0.0811186	0.0810674	-0.196781	-0.113574	-0.0392707	-0.110186	-0.0462066	-0.00492695	-0.115185	0.0173994	0.154926	-0.114372	-0.0811927	-0.0209116	0.139173	0.156331	0.00936068	0.0693159	-0.00167249	-0.00953755	0.236319	0.0424425	-0.0140455
P554	0.08213	-0.0177413	-0.076949	-0.0540692	0.107332	-0.069161	0.10882	0.0801867	-0.110327	-0.0840015	0.056187	-0.0198503	-0.105242	0.137544	-0.354467	0.10274	0.0022458	-0.0117006	-0.0600133	-0.00401184	0.0248409	0.13031	-0.125556	0.0787696	0.0583281	-0.100422	0.111977
P555	0.24854	0.0485901	0.198455	0.0481038	0.0903962	0.0794576	0.0775245	-0.0114279	-0.104271	-0.115887	0.139556	0.0740327	-0.00739377	0.100914	-0.101411	0.110856	0.222724	0.164837	0.00251	0.0782949	0.0478989	-0.124033	0.00212634	0.177689	0.0297061	-0.0760075	-0.0114184
P556	0.103011	-0.151871	0.015625	-0.0749031	-0.00523638	0.076607	0.151984	0.0650118	0.156789	0.0599098	0.15105	0.110144	0.0837133	-0.0546853	-0.0526568	0.0154273	0.136557	-0.1149	-0.185275	0.084413	-0.0861627	0.158569	-0.0182115	0.117378	-0.0166132	-0.234125	0.0790311
P557	0.409723	-0.155099	0.313854	-0.148445	0.237578	0.221652	0.591135	0.355879	0.160694	-0.0968702	0.182981	0.143964	-0.0457658	-0.165367	-0.154518	0.233269	0.490568	-0.219983	-0.272647	0.0113205	-0.104376	0.22772	0.320761	-0.120403	-0.176439	-0.658637	0.402368
P558	0.00387816	-0.119361	0.114108	-0.153538	0.069514	0.129716	0.312689	0.178347	0.124758	0.0278639	0.0352568	0.0927161	-0.129424	-0.0398792	-0.133878	0.156433	0.119307	-0.206598	-0.261019	-0.0758732	-0.127375	0.200385	0.101408	-0.167649	-0.166827	-0.420792	0.368131
P559	0.34066	-0.112211	0.0302729	-0.000790438	0.133494	0.160205	0.331933	0.196532	0.312507	-0.0375111	0.213354	0.138087	-0.0123915	-0.0739578	-0.0976886	0.298929	0.365839	-0.0223858	-0.179976	0.00304608	-0.109357	0.11335	-0.070818	0.00302952	-0.0409536	-0.376756	0.357837
P560	0.177667	0.0179025	0.0167568	-0.0792922	0.200203	0.170648	0.387323	0.252695	0.235218	-0.0191426	0.0475594	0.208106	-0.0523682	-0.0752229	-0.0420743	0.0412155	0.331543	-0.09334	-0.323873	0.0490554	-0.156021	0.202746	0.00497688	0.0216883	-0.232466	-0.443576	0.246022
P561	0.355491	-0.163993	0.143981	-0.00115857	0.18856	0.27898	0.455241	0.210598	0.356569	0.0964532	0.235819	0.200441	0.0319423	-0.155532	-0.137503	0.0824042	0.467116	-0.0838491	-0.346606	-0.0459315	-0.118024	0.180366	0.177575	-0.147844	-0.0579118	-0.538499	0.21525
P562	0.356505	-0.181222	0.206118	-0.0542056	0.204292	0.215001	0.549542	0.311451	0.0844049	-0.129075	0.0521274	0.0888616	-0.116477	-0.157509	-0.0961111	0.192214	0.407031	-0.123379	-0.258766	0.0185636	0.0276601	0.249403	0.205415	-0.0444021	-0.204266	-0.484456	0.38562
P563	-0.0947529	-0.080408	0.0676156	0.0269236	-0.0382264	-0.035118	0.130367	0.156921	-0.0734394	-0.0753582	0.00643316	-0.0516657	-0.0890642	0.180837	0.0973798	0.0659601	-0.128718	-0.126989	-0.202422	-0.0510878	0.105629	0.0261369	-0.0758031	-0.0986179	-0.242202	-0.188337	0.0894665
P564	0.421988	-0.327288	0.172673	-0.161547	0.0898352	0.0687344	0.560346	0.321556	0.358408	0.140686	0.0895147	0.197726	-0.0138693	-0.104205	-0.105981	0.155756	0.452754	-0.161677	-0.380717	-0.0253402	-0.032675	0.0760645	0.17234	-0.0617703	-0.144846	-0.544813	0.384284
P565	-0.159916	0.10332	-0.249937	-0.0265164	0.0399962	0.0147669	-0.121175	-0.0136683	-0.100453	-0.0496439	-0.0367114	-0.121991	0.0278129	0.190792	0.121885	-0.110443	-0.347116	0.0838487	0.153282	0.224312	0.240587	-0.00913297	-0.141441	-0.00962894	-0.0807158	0.163821	-0.0793252
P566	-0.0475553	0.0872777	0.0688997	-0.0877043	-0.159135	-0.201634	0.0283667	-0.0646072	0.0591773	0.0120695	-0.00415547	-0.0124155	0.0562836	0.0104824	0.0687398	0.0425163	0.00389444	0.02817	-0.119093	-0.162804	-0.156725	0.0875489	0.0119692	0.117492	0.000618139	0.139511	0.0808687
P567	-0.057195	-0.0585262	-0.053096	-0.0629105	-0.068206	0.0796877	-0.0906386	-0.0910508	0.0342192	0.0789351	0.0524466	0.14749	0.0837745	0.0609566	-0.000446318	-0.0207261	-0.0616143	0.107161	-0.0577038	0.027434	-0.0548513	0.0948593	-0.156687	0.122284	0.0527151	0.0678457	-0.0337941
P568	0.000723381	-0.0811605	0.182086	-0.00290546	0.178669	0.0662891	0.200495	0.0756928	0.114935	-0.129812	0.15113	0.13967	0.0347407	0.00359195	-0.110963	0.405582	0.111665	0.0798734	-0.00016865	0.129254	-0.0487701	0.0933123	0.0370652	-0.0020511	-0.0597553	-0.202898	0.27993
P569	0.127427	-0.0840705	0.155429	0.0305851	0.0225639	0.104479	0.288231	0.174325	0.20373	0.219975	0.143862	0.254306	-0.0833678	0.0647519	0.0473388	-0.0356665	0.116824	-0.116809	-0.431173	0.0458569	0.144958	0.301486	0.0415025	0.0620415	-0.130585	-0.08999	0.307071
P570	0.122829	-0.214191	0.215424	0.156175	-0.209754	-0.0963577	-0.0609568	-0.00849465	-0.115946	-0.132612	-0.0580627	-0.0182494	-0.086778	-0.122117	-0.0915771	0.0451066	0.252561	-0.0161565	0.0649348	-0.0191025	-0.232711	0.00675276	0.0759728	-0.0178622	0.13015	-0.0578318	0.103018
P571	-0.0271397	0.0211133	0.17222	-0.0389485	0.0118743	-0.00701143	-0.115688	-0.0410284	0.0174994	0.136028	0.0451959	0.0597642	0.0347599	0.0075212	-0.0268175	0.112566	-0.0400973	0.017285	-0.207211	0.0047173	-0.230275	0.0326816	-0.0142112	0.164935	-0.0682647	-0.0217625	0.00574782
P572	0.199905	-0.00578232	0.160908	-0.0445982	0.163407	0.152463	0.29799	0.252787	0.0213608	-0.104811	0.119641	0.190644	-0.015665	0.0789649	0.0139915	-0.0457103	0.251122	0.0214884	-0.110478	0.254394	0.0506297	0.088883	0.208862	-0.039146	-0.113611	-0.308554	0.140697
P573	-0.212215	0.0470111	-0.274876	-0.112234	0.0267605	-0.125912	-0.0647176	-0.0545826	0.0291069	0.168577	-0.12232	0.0156311	-0.0272221	0.138407	0.0762392	-0.164724	-0.339403	-0.0371308	-0.0102754	0.0596074	0.0806766	0.0011894	-0.138298	0.108106	-0.0209344	0.231257	-0.0407979
P574	0.2211	-0.0526398	0.0153079	-0.103509	0.0814105	0.0330701	0.228708	0.164072	0.396983	0.0829034	0.388681	0.4093	0.173573	0.0105576	0.032923	0.255082	0.287084	0.0858753	-0.227746	-0.0573137	-0.00651769	0.104895	-0.048661	0.0733714	-0.179982	-0.231212	0.280353
P575	0.475961	-0.199331	0.171024	0.00375516	0.13708	0.231155	0.537774	0.189234	0.285281	0.00371708	0.104817	0.125327	-0.135465	-0.187102	-0.190383	0.0867507	0.587427	-0.16996	-0.332495	-0.0683077	-0.142311	0.151924	0.248022	-0.0723101	-0.0210634	-0.627717	0.393537
P576	0.55069	-0.261042	0.133083	-0.109123	0.20598	0.282541	0.558799	0.334163	0.297528	0.0917188	0.162407	0.317211	-0.00035085	-0.0435931	-0.126979	0.184512	0.56659	0.00834563	-0.34509	-0.0129601	-0.07363	0.194229	0.179616	-0.119664	-0.0793412	-0.529645	0.510048
P577	-0.115389	0.0604275	-0.0652428	0.00420789	0.0237229	0.0677818	-0.0653355	-0.0267529	0.0488381	0.10293	0.0660595	0.0707805	-0.0562173	-0.0966226	0.0790818	0.0356718	-0.181659	-0.124896	0.132699	0.112975	-0.143425	0.18911	0.0169832	0.0191454	0.0262704	-0.0649827	-0.136834
P578	0.143447	-0.000219661	-0.0175219	-0.0463927	-0.101217	-0.0702489	0.000374287	-0.0360829	-0.0283575	0.0725621	0.0721539	0.0547149	0.0320704	-0.0951633	-0.0118284	0.0518475	0.166799	-0.203048	0.0849018	0.0659181	0.0286221	0.0728048	0.151584	0.0444439	0.0856035	-0.0107472	-0.0428393
P579	0.477818	-0.214441	0.170034	-0.0774933	0.158597	0.291844	0.617566	0.368058	0.23944	0.0802491	0.216258	0.27101	-0.0454225	-0.0340183	-0.156168	0.0936699	0.524968	-0.0671932	-0.413491	0.0363471	-0.0638264	0.0794853	0.0876918	-0.152428	-0.179227	-0.646605	0.445644
P580	0.373337	-0.0712536	-0.0265586	0.0298539	0.164151	0.160347	0.244896	0.229339	0.226077	0.0788838	0.160724	0.206815	0.0268898	0.0411927	-0.160118	0.127003	0.290723	0.109542	-0.135595	-0.0879008	-0.0204347	-0.0476058	-0.0758031	0.0196675	-0.0691748	-0.222374	0.219142
P581	0.301683	-0.132455	-0.0052532	-0.122309	0.135315	0.122808	0.380515	0.276608	0.291901	0.129498	0.458149	0.406855	0.165234	0.000650744	-0.0873711	0.18931	0.300122	0.0129188	-0.246599	-0.106215	0.0146769	0.121977	0.10824	0.0624696	-0.147048	-0.289303	0.294295
P582	-0.0261452	0.103954	-0.0568196	-0.0998627	-0.134655	-0.0252386	0.0519641	0.244979	0.135408	0.0194283	0.0949931	0.0751948	-0.0856832	-0.0072592	0.165907	-0.00687793	0.026943	0.0141903	-0.080272	-0.0872718	0.0504688	0.0905178	0.0232808	-0.127603	-0.147185	-0.0250001	0.193503
P583	0.277017	-0.165219	0.0815602	-0.0781479	0.24164	0.176217	0.544067	0.456663	0.361511	0.0664955	0.291254	0.263554	0.0674649	-0.139807	-0.115683	0.188074	0.367245	-0.135868	-0.346028	0.117983	-0.0158659	0.205867	0.122935	0.0109975	-0.320979	-0.51854	0.335684
P584	0.272444	-0.282799	0.0504351	-0.104696	0.0571122	0.308107	0.349641	0.284305	0.417171	0.0848116	0.102823	0.182162	0.0633933	-0.0469837	0.00809832	0.105801	0.329087	-0.136995	-0.341849	-0.105979	0.0451647	0.20582	-0.00438215	-0.0590937	-0.0535507	-0.401841	0.302075
P585	0.653901	-0.202483	0.256485	-0.161995	0.126594	0.203679	0.477739	0.361673	0.284621	-0.0472408	0.250489	0.191366	-0.064132	-0.150073	-0.0375335	0.162755	0.746664	-0.0745294	-0.280096	-0.156544	-0.0515917	-0.0443157	0.397322	-0.132994	-0.0237264	-0.553473	0.348281
P586	0.19143	-0.18887	0.168925	-0.141348	0.099442	0.247046	0.467498	0.322255	0.21905	-0.0560729	0.104925	0.13014	-0.109629	-0.14262	-0.072431	0.173013	0.281189	-0.152387	-0.359313	-0.151907	0.103839	0.267732	0.0906309	-0.059891	-0.168509	-0.50836	0.470433
P587	0.295927	-0.233566	0.0280846	0.0567727	0.165861	0.183426	0.224273	0.26583	0.300019	0.0178442	0.106019	0.153285	0.107192	-0.121989	-0.0233409	0.184883	0.402157	0.0679238	-0.300195	-0.0467309	-0.0143342	0.0527617	-0.0279425	-0.120685	-0.058855	-0.436609	0.326805
P588	0.0779569	0.0667832	0.126836	0.0434374	0.0303801	-0.0156026	0.023195	0.107184	0.0694932	-0.180786	-0.0847621	-0.0754436	-0.0391843	0.0236006	0.0238262	-0.019263	0.0800294	0.0952321	0.10815	-0.0323933	0.0521762	0.0708195	0.0953431	-0.0557958	0.0693957	0.0556276	-0.0401746
P589	0.450502	-0.255793	0.113306	-0.161797	0.157178	0.122975	0.500879	0.328982	0.331395	-0.000857933	0.245393	0.305371	0.0496673	-0.160265	-0.220443	0.216674	0.515279	0.00134969	-0.217104	0.054109	-0.104758	0.141604	0.365371	-0.0817871	-0.0891511	-0.581317	0.348179
P590	-0.290223	0.219329	-0.0417572	0.153349	0.025444	-0.255327	-0.248218	-0.145614	-0.125541	0.000429779	0.136358	-0.101033	0.0492965	0.0998747	0.0386123	0.00904534	-0.472496	0.0474351	0.168916	0.12252	0.0551604	-0.0297274	-0.160694	0.184009	-0.0174038	0.299123	-0.240234
P591	0.179661	-0.0280181	0.0275404	-0.0588033	0.121863	0.164801	0.183372	0.16804	0.234204	0.0672761	0.522673	0.48136	0.223609	0.00439428	-0.0553054	0.144623	0.221877	0.0692782	-0.0752136	-0.00747654	0.0465049	0.175169	-0.0352905	0.0340718	-0.203902	-0.165637	0.2686
P592	0.296174	-0.0257548	0.118914	-0.112215	0.0806388	0.111648	0.304883	0.219144	0.0817404	0.0199077	0.148579	0.141586	0.0498916	-0.099179	-0.073675	0.0622728	0.402127	0.000265475	-0.244064	-0.151234	-0.105695	-0.0429392	0.0238879	0.0061367	-0.0739708	-0.393186	0.298686
P593	-0.111215	0.145386	-0.145145	0.113205	0.0281261	0.0352237	-0.0233808	0.0977183	0.00235761	0.00136692	0.0635141	0.0183624	0.0469148	0.246272	0.303867	-0.0513403	-0.273709	0.0206045	-0.00047866	0.0362995	0.310108	0.0637366	-0.13514	-0.00884257	-0.168835	0.106548	-0.0182255
P594	0.364313	-0.400062	0.211164	-0.0725504	-0.00565568	0.147456	0.440617	0.254722	0.27517	-0.0317395	0.00476988	0.0676906	-0.0528762	-0.216358	-0.213384	0.0868216	0.46088	-0.0817801	-0.355103	-0.192766	-0.0907709	0.0812967	0.209287	-0.241759	-0.0305723	-0.54235	0.283849
P595	0.0648006	-0.0343569	0.14135	0.0847403	-0.0271714	-0.10994	-0.178278	-0.213594	-0.170063	-0.157476	0.16282	-0.146917	-0.0829276	0.0198083	-0.109524	0.160698	-0.120099	0.160111	0.223011	0.102784	0.0773836	-0.00424384	-0.0353071	0.127611	0.0486418	0.149595	-0.0604304
P596	0.653591	-0.247629	0.289672	-0.0463075	0.128771	0.266115	0.619665	0.349867	0.243184	0.0174236	0.252599	0.166236	-0.00714163	-0.170365	-0.27734	0.161061	0.739301	-0.114072	-0.289216	0.0279648	-0.155759	0.121717	0.312198	-0.0524556	-0.135765	-0.626542	0.399722
P597	0.452312	-0.151831	0.263167	-0.0661136	0.247184	0.321099	0.693352	0.42185	0.251468	-0.0697985	0.253724	0.199155	-0.026766	-0.08665	-0.106876	0.1274	0.507539	-0.129479	-0.329885	0.0599049	-0.0224265	0.16471	0.294815	-0.0140188	-0.240843	-0.609627	0.42061
P598	0.0830251	-0.0732082	0.0199724	-0.142268	-0.0629969	0.10717	0.13429	0.0852387	0.113483	0.0761104	0.00329294	0.0224595	0.0705616	-0.122837	-0.115732	-0.00505667	0.164501	-0.0366448	-0.140737	-0.106606	0.0358342	0.178979	0.120523	0.0290843	-0.0198649	-0.0478378	-0.0837175
P599	-0.212903	0.104145	-0.0104746	0.0083121	-0.00552159	-0.0815529	-0.329991	-0.10722	-0.255347	-0.0972116	-0.107415	-0.0850504	0.0111962	0.0453792	0.134279	-0.0589432	-0.238111	0.0800441	0.240154	0.0771443	0.0244686	-0.15514	-0.0863163	0.0214155	0.15178	0.23	-0.275412
P600	-0.244315	0.139764	-0.143335	0.00875603	0.0237453	-0.11001	-0.0525828	-0.0891884	-0.0861951	0.0147016	-0.0999133	-0.0942885	-0.109181	0.0569866	0.0440687	-0.0331664	-0.238787	-0.00203216	0.110572	0.0417124	0.0333174	-0.0931395	0.0412785	-0.0914936	0.0428692	0.155375	-0.171155
P601	0.165534	-0.100278	0.0706955	-0.127524	0.0998272	0.105667	0.340094	0.266985	0.212065	-0.187575	0.103807	0.113082	-0.0737608	-0.129185	-0.033519	0.168118	0.27527	-0.0699686	-0.213456	-0.127641	0.133323	0.0684285	0.0792184	-0.141845	-0.115606	-0.442886	0.37005
P602	-0.0187198	0.127297	-0.0280004	0.0387852	0.149864	-0.0984609	-0.0471238	0.150048	-0.0724854	-0.217651	0.0327786	0.0435691	-0.00577215	0.133444	0.0235592	0.0423711	-0.0964094	0.149636	0.246684	0.232498	0.0606034	0.00307419	-0.160088	0.127082	-0.0486293	0.118981	0.0871418
P603	0.115678	0.127868	0.156555	0.146481	0.0672983	0.0443363	0.158284	0.128716	0.00203835	-0.110066	-0.0186969	0.143024	-0.0486467	-0.10543	-0.174074	0.0118135	0.139519	0.112151	0.026287	-0.0337554	-0.0336311	0.289642	-0.0308256	0.10307	-0.0571832	-0.170133	0.0216004
P604	0.146174	-0.185015	0.0605581	0.000712797	0.137474	0.126679	0.312441	0.149461	0.256679	-0.0739585	0.11638	0.0976649	-0.0344504	-0.114622	-0.0825524	0.313344	0.243788	-0.0257324	-0.282067	-0.10878	0.0130253	0.104522	-0.105629	-0.121237	-0.158009	-0.39692	0.279948
P605	0.034013	-0.050159	0.106753	-0.0256409	0.185569	0.0746475	0.212361	0.154203	0.0133128	-0.186324	0.060718	0.032831	-0.0879881	0.249799	0.0347578	0.314944	0.0248827	-0.0524102	-0.123369	0.0375769	0.0680315	0.122106	0.0355368	-0.206747	-0.206225	-0.318598	0.220815
P606	0.441707	-0.217933	0.214452	-0.0928649	0.256185	0.339345	0.686475	0.450347	0.258379	-0.112563	0.150866	0.173366	-0.0712117	-0.186455	-0.094905	0.239264	0.564827	-0.198984	-0.390731	0.00949191	-0.000625945	0.13983	0.215726	-0.0264424	-0.306225	-0.67759	0.419451
P607	0.207062	-0.101516	0.154624	0.0763345	0.0342845	0.0535329	0.29339	0.295029	0.182129	-0.0511476	0.121227	0.122361	0.0579406	-0.125606	-0.107731	0.0691344	0.243004	-0.0286826	-0.21908	-0.173933	0.0118003	0.0536542	0.0935859	-0.100423	-0.0724716	-0.416664	0.332894
P608	0.0740716	-0.164859	-0.0503452	0.00741392	-0.0859524	-0.111321	0.0357644	0.0738689	0.162828	0.219153	0.092824	0.250792	0.121366	-0.137183	-0.13868	0.117968	0.201166	0.0387747	-0.203614	-0.171012	-0.116164	0.0340989	0.111668	-0.0677465	-0.00259227	-0.0373845	0.241914
P609	0.479163	-0.100428	0.12994	-0.0306555	0.125816	0.280413	0.474379	0.374109	0.328323	-0.0699276	0.133548	0.146113	-0.0602938	-0.146646	-0.0354264	0.112075	0.509474	-0.100553	-0.249249	-0.19106	-0.0610372	0.0950742	0.187315	-0.134191	-0.112248	-0.569417	0.29979
P610	-0.197698	-0.0152842	-0.136123	-0.0902399	-0.0553025	-0.0762432	-0.308063	-0.189215	-0.0233708	0.0960395	-0.0940816	-0.0874165	-0.0505394	0.117385	0.219539	-0.0689937	-0.226768	0.116579	-0.0162127	0.0246388	0.017377	-0.191951	-0.0357064	0.0713986	0.0155039	0.218387	-0.0110561
P611	0.554112	-0.180401	0.185282	-0.0766079	0.229699	0.291385	0.609159	0.428194	0.232324	-0.0422983	0.194282	0.202829	-0.0471217	-0.0484623	-0.0969369	0.129899	0.589656	-0.0377957	-0.365561	0.0569302	-0.00159577	0.177991	0.207441	-0.0461089	-0.264138	-0.578284	0.421419
P612	0.420545	-0.23802	0.158929	-0.0167555	0.171651	0.204339	0.607575	0.515026	0.24025	-0.11216	0.165815	0.240965	0.0636009	-0.210566	-0.195504	0.334699	0.537706	-0.107612	-0.22863	0.0190773	0.0209916	0.235756	0.246595	-0.0533853	-0.241711	-0.58426	0.314714
P613	0.405409	-0.0962702	0.25834	-0.152014	0.246561	0.260877	0.53711	0.358023	0.24922	-0.0199223	0.191443	0.218907	-0.0253358	-0.0354663	-0.156965	0.187731	0.516632	-0.136106	-0.29121	0.017699	-0.115224	0.281913	0.275437	-0.104565	-0.339873	-0.478391	0.340686
P614	0.222722	-0.124823	0.112267	-0.0558359	0.0504791	0.285593	0.425035	0.312138	0.250446	0.0511743	0.214868	0.201163	-0.0261399	-0.000794193	-0.0465003	-0.0433602	0.25678	-0.0819845	-0.273457	0.0660698	-0.0510188	0.2986	-0.105277	0.0634517	-0.328669	-0.370867	0.417213
P615	0.614362	-0.264917	0.211557	-0.109093	0.182251	0.285285	0.584089	0.343918	0.273804	0.0585316	0.218571	0.298422	-0.0117083	-0.153483	-0.177665	0.214797	0.771251	-0.0687489	-0.334988	-0.0289036	-0.147596	0.121662	0.377708	-0.0643888	-0.137939	-0.593002	0.347788
P616	0.255566	-0.175146	0.0420676	-0.13765	0.0280959	0.1906	0.337462	0.299928	0.194209	0.0850096	0.275739	0.250051	0.107982	0.0177759	-0.0972988	0.10798	0.278502	0.0113871	-0.262977	-0.142891	-0.0120876	0.0955142	-0.0172716	0.084333	-0.0520776	-0.358943	0.226216
P617	0.084139	-0.0630465	0.00416927	-0.00488682	-0.0550302	0.0659246	0.0242505	-0.00782255	-0.0569429	0.0124882	-0.00435953	0.0180215	-0.0304432	0.0451884	-0.0667057	0.0217853	0.024936	0.121768	0.109676	0.162092	0.0270045	0.0353041	0.0667978	-0.0739887	-0.0259321	0.0537877	0.0734472
P618	-0.041868	0.0290391	-0.160092	-0.0310179	0.0354052	0.057157	-0.0617032	-0.17562	0.108314	0.0623075	0.0749576	0.0688391	0.00184006	0.0904099	-0.0106198	0.092877	-0.0344838	0.130839	0.100891	-0.00708471	-0.0723833	0.00162634	-0.146084	0.094639	-0.0433226	-0.0434585	-0.0308972
P619	0.244836	-0.165719	0.0616319	-0.168073	0.0829223	0.0886766	0.279757	0.160746	0.218209	0.0929412	0.345886	0.355792	0.175436	-0.0159862	-0.0805175	0.293669	0.239442	-0.14679	-0.140985	-0.00715875	-0.0770372	0.155231	0.0901285	0.0603666	-0.161515	-0.21403	0.242354
P620	0.545362	-0.241946	0.165415	-0.0624305	0.203825	0.213249	0.623513	0.407114	0.319966	0.0350438	0.288076	0.267342	0.0138792	-0.177068	-0.208214	0.243926	0.626952	-0.0978853	-0.353509	-0.0376402	-0.0531271	0.142617	0.333354	0.0257479	-0.122629	-0.612908	0.399592
P621	0.413073	-0.175637	0.131064	-0.10514	0.114589	0.306972	0.591544	0.257834	0.287456	-0.09089	0.145457	0.16789	0.0546633	-0.034752	-0.0836897	0.135392	0.371084	-0.0892175	-0.345631	0.0115045	8.19835e-05	0.171048	0.109652	0.00254054	-0.155615	-0.510435	0.335358
P622	0.605283	-0.26071	0.252589	-0.115393	0.113358	0.232488	0.568572	0.311023	0.190092	-0.129555	0.0318354	0.0878956	-0.139368	-0.197138	-0.192473	0.131578	0.698325	-0.115188	-0.255857	-0.0626524	-0.109954	0.184651	0.347402	-0.171297	0.00456009	-0.601917	0.34882
P623	0.116835	0.145251	0.0513416	-0.05824	0.135359	0.0350401	0.120607	0.147117	0.206816	0.0354334	0.460083	0.378603	0.219867	0.0847853	0.062786	0.242059	0.123119	0.125563	0.0279858	-0.121401	0.119223	0.0724329	0.0560003	0.0403737	-0.224432	-0.0617684	0.151992
P624	0.220966	-0.254412	0.193483	-0.132762	0.150479	0.0452683	0.483227	0.333175	0.228541	0.141003	0.171555	0.277743	0.0573586	-0.201453	-0.16189	0.27799	0.376046	-0.0907847	-0.310468	-0.114225	-0.088246	0.174321	0.220879	-0.0143089	-0.090571	-0.51504	0.248294
P625	0.38134	-0.0979228	0.099771	-0.0271333	0.174169	0.308066	0.567978	0.339758	0.371951	0.0905297	0.291199	0.254898	0.0345982	-0.0181005	-0.107382	0.140665	0.393944	-0.0763715	-0.266373	0.19054	-0.0224341	0.182724	-0.0880168	0.090454	-0.28714	-0.40904	0.33007
P626	0.329243	-0.05952	0.113359	-0.0255027	0.0597173	0.297556	0.352492	0.261496	0.229269	0.0320065	0.131003	0.148987	-0.0802266	-0.099179	-0.0278724	-0.0281875	0.483601	-0.0675988	-0.244064	-0.169134	0.048294	0.0634937	0.179174	-0.212783	-0.0125815	-0.375001	0.221506
P627	0.0773819	0.0413639	0.146553	-0.0126602	-0.0679013	0.0686243	0.0356451	0.0213578	-0.253993	-0.139893	0.0178229	-0.0917758	-0.0863126	0.0837008	-0.057566	0.174513	0.0342096	-0.0186431	-0.0112969	0.234075	-0.112159	0.150215	0.150192	0.108051	-0.0175746	-0.0595562	0.0426769
P628	0.353639	-0.223225	0.175233	-0.180861	0.2135	0.150761	0.580781	0.393177	0.192923	-0.0869618	0.228	0.18434	0.0233705	-0.0333451	-0.115456	0.373205	0.432265	-0.162146	-0.33975	-0.0275915	0.00430615	0.043189	0.252546	-0.153094	-0.235182	-0.451197	0.348312
P629	0.249725	0.0659745	0.104226	-0.0274061	0.225857	0.110401	0.453413	0.179013	0.0495837	-0.166471	0.0152359	-0.019889	-0.166634	-0.125606	-0.0549733	0.0590682	0.337329	-0.123554	-0.150165	0.117281	-0.116418	0.0855231	-0.0156338	0.0570528	-0.206477	-0.377645	0.283067
P630	-0.222097	-0.0116484	-0.0208948	0.0300532	0.0070424	0.0520977	-0.0215737	0.155462	0.0154112	-0.00121969	0.0449039	0.044758	-0.00390956	0.107268	0.108314	0.0534434	-0.255445	-0.066191	-0.237349	-0.00971926	0.177509	0.105563	-0.119049	-0.0443339	-0.0806223	-0.06542	0.114061
P631	-0.0929367	0.0137441	-0.182016	-0.0360807	0.00340947	-0.0174608	0.0130242	0.0144833	-0.129769	-0.143316	-0.113944	-0.116518	-0.182242	0.0691893	0.0399256	-0.152937	-0.067046	-0.0971354	-0.0287674	0.117422	0.173723	-0.294758	-0.154124	-0.11743	0.0552784	-0.062568	0.0340159
P632	0.310541	-0.0682829	-0.0221115	-0.0863662	0.0597476	0.0864728	0.324389	0.191809	0.386443	0.00121172	0.283292	0.346609	0.118043	-0.0660648	-0.051125	0.35285	0.44118	0.0544592	-0.160351	0.0296974	-0.0164434	0.165041	-0.047519	0.149977	-0.140733	-0.229391	0.349464
P633	0.0607541	-0.0531339	-0.123249	-0.257026	-0.143243	0.098592	0.263885	0.203725	0.0069262	0.140356	-0.011515	-0.0573739	0.0551969	-0.00170588	0.0209454	-0.0825641	0.0727941	-0.0866487	-0.265932	0.0864876	-0.0995355	0.125185	-0.0459829	0.0335045	-0.194923	-0.0932858	0.113866
P634	-0.0470402	0.00668106	0.0513987	0.118982	0.0824628	-0.0535224	-0.0933027	0.0596213	-0.021896	-0.0137914	0.0856527	-0.115121	0.0197442	-0.169687	0.121183	-0.0485639	-0.0531363	0.0709981	0.137934	-0.0185261	0.155363	0.0320258	-0.0281357	0.144477	-0.0442686	0.142686	-0.0111967
P635	0.27672	-0.222086	0.255731	0.0689539	0.170667	0.18611	0.362528	0.252356	0.164294	-0.00965766	0.158876	0.281111	0.00691889	-0.0951203	-0.105913	0.219886	0.395417	-0.0430945	-0.116458	0.0484835	-0.0202853	0.204841	0.369222	-0.127627	-0.0835255	-0.358586	0.270782
P636	0.296807	-0.072136	0.115982	-0.0861518	0.177802	0.309161	0.490061	0.28555	0.41782	0.0403371	0.244205	0.18733	0.0814365	-0.0448621	-0.113011	0.144988	0.391208	-0.130717	-0.456553	0.00173158	0.00452822	0.183973	-0.0791443	0.0987674	-0.0945064	-0.507551	0.24495
P637	0.0781634	-0.105844	0.0384103	0.0257476	0.148282	0.0630146	0.0305077	0.0430856	-0.047855	0.0646536	0.145405	0.123127	0.0547724	-0.014885	-0.0681791	-0.0841622	-0.0106967	0.0946385	-0.0498844	0.0402384	-0.00480895	0.0561824	-0.0713562	0.0141915	-0.0871229	-0.0783257	0.161611
P638	0.0624122	-0.0575866	0.26712	-0.0577788	0.0973527	-0.00157278	0.236012	0.0977702	0.0580141	-0.137926	-0.0306007	-0.0208236	-0.171806	-0.110861	-0.0541886	0.251339	0.168372	-0.15338	-0.207029	-0.00258735	-0.182278	0.15571	0.142154	-0.122207	-0.145666	-0.344778	0.129166
P639	0.124206	-0.0197037	0.144448	-0.112417	0.0865911	-0.0370455	0.197067	0.0910234	0.0139671	-0.237184	0.0545805	-0.103051	-0.0663905	-0.0625405	-0.00517783	0.0225211	0.118651	-0.184758	-0.0678357	-0.044552	-0.0206559	0.0881283	-0.0576335	-0.0849761	-0.21354	-0.261196	0.101014
P640	-0.0768276	-0.0252357	-0.0525782	0.0416874	0.0921934	-0.011295	-0.0364874	0.0561126	-0.0613841	-0.0660226	0.0984145	0.140029	0.0765296	0.0528797	0.0473188	-0.0157309	-0.101726	0.0437574	0.0129532	0.167459	0.0462579	0.0398755	-0.0715777	-0.0204829	0.0844038	0.0896245	0.00311511
P641	0.279225	-0.318316	0.079882	-0.17922	0.116821	0.221822	0.341045	0.251491	0.220371	0.13205	0.348581	0.332402	0.0558526	0.00906422	-0.0747799	0.101542	0.274614	-0.00851944	-0.330097	-0.0483821	-0.0711241	0.157559	-0.0430754	-0.0688224	-0.230325	-0.266545	0.433866
P642	-0.308817	0.123636	0.00686908	0.258275	-0.200653	-0.256472	-0.528832	-0.308944	-0.346505	-0.244542	0.0108658	-0.217543	-0.0356028	-0.187102	0.136593	-0.0447038	-0.332974	0.176995	0.404683	-0.0463944	0.129575	-0.0362557	-0.172422	0.118446	0.219097	0.420622	-0.398639
P643	0.643801	-0.249065	0.217505	-0.113854	0.203194	0.330776	0.594331	0.401177	0.396517	0.0199256	0.210116	0.270103	0.0238101	-0.160265	-0.0910261	0.201423	0.799216	-0.0871358	-0.360068	-0.113326	-0.0404967	0.0694465	0.354269	-0.118239	-0.0433114	-0.585618	0.430851
P644	0.146996	0.104668	-0.038026	-0.0616752	0.0793527	0.125354	0.195777	0.214349	0.16206	0.0728266	0.262228	0.230795	0.0327581	0.219965	0.100809	0.10405	0.0900136	0.0836704	-0.0591063	0.13849	0.00883395	0.108863	-0.119049	0.0610334	-0.253838	-0.0159191	0.144403
P645	0.13396	0.0593167	0.289227	-0.0447312	0.0989737	0.0755942	0.0432928	-0.0160223	-0.155627	-0.333715	0.0176522	-0.100321	-0.180682	0.133602	0.0748416	0.0257918	0.0999568	0.0336707	0.18339	0.0521945	-0.0154508	-0.0217708	0.12586	0.0500237	-0.0865271	-0.126611	-0.00554438
P646	0.262059	-0.0622825	0.108186	-0.087034	0.364532	0.11618	0.518412	0.403345	0.195574	-0.0256322	0.084541	0.223958	0.0106631	-0.0574362	-0.0205506	0.158696	0.322493	-0.132389	-0.221938	-0.0138965	-0.123452	0.115106	0.177599	-0.22669	-0.264702	-0.525022	0.30807
P647	0.208082	-0.00190074	0.118748	-0.0476508	0.244323	0.148359	0.464282	0.211193	0.143824	-0.15719	0.0572801	0.0501994	-0.0688184	0.0865524	-0.0331402	0.324692	0.181912	-0.140576	-0.138961	0.000126514	0.089707	0.22471	0.0300111	0.0790185	-0.267667	-0.363435	0.25348
P648	0.49588	-0.235359	0.0926834	-0.0543309	0.182651	0.341558	0.525609	0.432204	0.3409	0.0613293	0.188639	0.234434	0.0205619	-0.183758	-0.118338	0.0974357	0.642927	-0.0456059	-0.346621	-0.0508567	-0.0221119	0.138251	0.186794	-0.0285519	-0.0344167	-0.516341	0.416526
P649	0.0176389	0.150428	0.21977	0.157786	0.121997	-0.050569	-0.160078	-0.0328326	-0.275443	-0.292868	0.0560756	0.0894235	-0.0781858	-0.0167605	0.0760381	-0.0292627	0.056974	0.158232	0.302464	0.0648738	0.0103534	-0.00423015	0.154903	0.000604284	0.161048	0.00304064	-0.1439
P650	-0.0219059	0.149217	0.1083	0.072818	0.0942226	0.105452	0.134062	-0.00552032	-0.0482997	0.0558889	-0.0520128	-0.159282	-0.048213	-0.0481921	-0.155783	-0.0299679	0.0439787	0.0498117	-0.0517638	0.0164784	-0.0259934	-0.065892	0.0672087	0.00350387	-0.0639677	-0.0453622	0.0240039
P651	-0.0021004	0.106019	-0.0976518	-0.045187	0.0221821	-0.00791023	0.0143408	0.0420217	-0.0804479	-0.0327706	-0.0708759	-0.0630811	-0.101361	0.126783	0.0228794	-0.108078	0.0719212	0.0275832	0.0723982	0.101715	-0.079744	-0.00736864	-0.0593389	0.0642646	-0.0186687	0.109958	-0.0933203
P652	0.0262096	0.132639	0.0588333	0.175405	0.00812964	-0.137878	0.00484638	-0.0395769	-0.208238	-0.0929108	0.0492479	0.124571	-0.025882	0.0903642	-0.0440051	-0.0267476	0.061847	-0.0677155	0.0324977	-0.0864949	-0.0219739	0.168546	0.080497	0.0662398	-0.0800532	0.0429632	0.0748795
P653	0.534145	-0.163876	0.232419	-0.0944065	0.136081	0.162577	0.490723	0.336362	0.256956	0.0239995	0.197364	0.187799	-0.115336	-0.125606	-0.173544	0.117793	0.602527	-0.0953722	-0.266277	-0.116229	-0.11109	0.117418	0.538199	-0.122686	-0.0532905	-0.491177	0.260919
P654	-0.0752269	-0.0574335	0.0330097	-0.0077752	0.204394	0.0462596	0.296823	0.26415	0.0975781	-0.10715	-0.0800008	0.0422622	-0.0633637	-0.0409421	-0.0579793	0.322197	0.0295208	-0.0181962	-0.129218	0.0230189	0.131094	0.183414	-0.109045	-0.160333	-0.218673	-0.281666	0.29247
P655	0.327698	-0.13791	0.259465	0.0692725	0.211403	0.257795	0.497086	0.372918	0.209924	-0.105264	0.205786	0.119302	-0.0527099	-0.197138	-0.103138	0.188608	0.358593	-0.164691	-0.320312	-0.0349399	0.0169049	0.284688	0.260008	-0.121417	-0.147604	-0.549719	0.344657
P656	0.342867	-0.116415	0.220748	-0.026384	0.12591	0.154745	0.4002	0.267964	0.181656	0.0496657	0.291374	0.248532	-0.117892	-0.0932729	-0.169703	0.180898	0.416878	-0.120397	-0.190991	-0.0243567	-0.117233	0.148706	0.279593	-0.120981	0.00566751	-0.375573	0.310911
P657	0.1694	-0.178867	-0.0341998	-0.149388	0.068513	0.0205484	0.37537	0.1731	0.2325	0.057922	0.114247	0.396235	0.0206394	-0.0681603	-0.155081	0.19092	0.191505	-0.012031	-0.125149	-0.101493	0.0443247	0.0589099	0.0375359	-0.123827	-0.0954475	-0.350048	0.273512
P658	0.0484082	0.0547857	-0.152778	-0.134186	0.162614	0.244801	0.125971	0.0545933	-0.0349659	-0.0601023	-0.018411	-0.0275627	-0.216551	0.115707	0.00794842	-0.208807	0.00528745	-0.0687024	-0.158613	0.201975	-0.0669849	0.134095	-0.073375	0.00685923	0.0327991	-0.169206	0.0971362
P659	-0.304047	0.0831096	-0.169967	0.0657386	-0.0516309	-0.176762	-0.228759	-0.17343	-0.0815035	0.0483491	-0.0686749	-0.157512	0.0864538	0.087549	0.157043	-0.149533	-0.483836	-0.0666442	0.0514275	-0.011061	-0.0377681	-0.0482093	-0.197151	0.0502436	-0.0312806	0.229699	-0.236339
P660	0.321636	0.0844008	0.095646	-0.167944	0.0698611	0.166892	0.453237	0.191209	0.154573	-0.154115	0.0208563	-0.0183135	-0.220168	-0.186455	-0.136028	0.160242	0.464312	-0.11428	-0.144592	0.0246583	-0.0533803	0.114614	0.170457	0.0791647	-0.0630566	-0.413969	0.164661
P661	-0.0202301	0.118495	-0.0853577	0.0833818	-0.0356893	-0.0407653	-0.132557	0.0541104	0.0385967	0.0822423	-0.0415112	-0.00953412	-0.0131369	0.13752	-0.0821068	-0.10774	-0.0680564	0.215061	0.0200985	0.102987	-0.0341357	-0.0955062	0.0761352	-0.0311864	0.0736699	0.189473	-0.0853969
P662	0.403426	0.0181942	0.166357	-0.116408	0.167101	0.287761	0.409161	0.241022	0.118019	-0.0733262	0.183762	0.0975468	0.0445369	0.260517	-0.0431412	-0.0158766	0.362805	-0.083149	-0.20831	-0.0489937	0.0641911	0.0392848	0.114448	-0.0330665	-0.163658	-0.274091	0.220097
P663	0.123152	-0.0075014	-0.0246812	0.0692693	-0.11395	0.0922852	0.0614102	0.082982	0.247089	0.195442	0.210231	0.160682	0.00170052	-0.0179294	-0.00743935	0.0649245	0.112508	0.0153881	-0.0820404	0.112495	-0.144059	0.236483	0.070715	0.106025	0.0020698	-0.0327748	0.0551954
P664	0.332028	-0.0971645	0.0237797	-0.00650752	0.160626	0.152886	0.395911	0.209858	0.369744	-0.00615964	0.20747	0.235479	0.0872197	0.0205502	-0.116264	0.16932	0.345752	-0.152903	-0.25412	-0.0302915	-0.0757089	0.198544	0.0876017	0.0172643	-0.259876	-0.340728	0.178593
P665	0.10301	-0.216631	-0.176382	-0.0791372	0.0103176	0.129138	0.216083	-0.0529078	0.18006	0.0857409	0.128758	0.187326	-0.00277444	-0.00090641	0.0523884	0.0805588	0.0439449	-0.173682	-0.152981	-0.0102201	-0.0561831	0.0948285	0.103218	-0.116869	0.0339164	-0.0629134	0.0247435
P666	0.202147	0.106194	0.233863	-0.000638735	0.125299	0.0396113	0.239681	0.206732	0.128968	-0.0667849	0.0821554	0.059723	-0.0951524	-0.0625405	0.0674264	0.238858	0.456705	0.0286316	-0.153902	-0.124308	-0.102328	0.0112203	0.115223	-0.108684	-0.120843	-0.206618	0.220971
P667	0.513583	-0.171351	0.194997	-0.125066	0.124715	0.263241	0.608781	0.370141	0.334224	-0.0132756	0.217762	0.277488	-0.0542559	-0.183758	-0.213696	0.152138	0.606799	-0.181952	-0.272611	-0.0267225	-0.132448	0.157829	0.203296	-0.0654658	-0.207329	-0.642939	0.414896
P668	0.114194	-0.029788	-0.0184324	-0.038212	0.0446926	0.214163	0.388137	0.2104	0.155618	0.0276622	0.0274385	0.172969	-0.0203591	0.0401674	0.0670884	0.125734	0.150553	0.046133	-0.105967	0.0751659	0.204842	0.174991	-0.0946401	0.0307353	-0.16907	-0.230111	0.0897222
P669	0.631374	-0.308748	0.274463	-0.0268783	0.116748	0.261145	0.558945	0.34542	0.267383	-0.0935396	0.186793	0.25939	-0.0825683	-0.16364	-0.103611	0.235953	0.799889	-0.0104759	-0.314249	-0.0623569	-0.0445983	0.159258	0.35648	-0.0778415	-0.102301	-0.585273	0.438811
P670	-0.0826267	-0.0904278	-0.218797	-0.057905	-0.0435053	-0.0887335	-0.113247	-0.0662435	-0.117443	0.086505	0.0537405	0.016374	-0.0519982	0.297703	0.0846454	0.0108012	-0.179566	0.0697816	0.143172	0.0632986	0.0879591	0.0493193	-0.178586	-0.0109167	-0.0455095	0.212001	-0.166954
P671	0.0741012	-0.0921727	-0.0253169	-0.0846552	0.20329	0.0947072	0.170397	0.125059	0.226117	0.0771914	0.241445	0.287216	0.192132	0.0448631	-0.0626296	0.366325	0.137019	0.152787	-0.0966859	0.0567465	-0.0195784	0.0990175	-0.122316	0.0468501	-0.157877	-0.167574	0.234397
P672	0.371279	-0.219098	0.203748	-0.160753	0.1529	0.215255	0.651431	0.429549	0.371826	0.178934	0.174929	0.319129	0.0203617	-0.199438	-0.193335	0.157607	0.442899	-0.21577	-0.395482	-0.0383046	-0.0323602	0.188338	0.250724	-0.094994	-0.133042	-0.517726	0.437615
P673	-0.348377	0.148536	-0.134006	0.211032	0.03637	-0.0954064	-0.500078	-0.204165	-0.0890992	0.06449	-0.0766819	-0.0544971	0.140567	0.0345019	0.140743	-0.110239	-0.323465	0.0987031	0.127991	0.0936085	-0.0291791	-0.111611	-0.219096	0.143748	0.0434369	0.45644	-0.222594
P674	0.187197	-0.107924	-0.0472593	0.0110507	-0.032555	0.141119	0.215056	0.139237	0.136128	-0.0946434	-0.00562651	0.0611461	-0.0724771	-0.0568282	0.0820526	-0.089631	0.171809	0.0223039	-0.139845	0.101043	0.100679	-0.0117828	-0.0523694	0.0151555	-0.0444051	-0.146809	0.210054
P675	0.252946	-0.109797	0.139231	-0.0964087	0.205196	0.312642	0.603629	0.364499	0.18831	0.000565387	0.10115	0.118744	0.034502	0.108056	0.0973749	0.107338	0.266681	-0.1435	-0.296936	0.112555	0.147937	0.180586	0.0762021	-0.104463	-0.260549	-0.407903	0.321105
P676	0.387245	-0.20165	-0.0505829	0.0469195	0.00210076	0.26118	0.215026	0.242147	0.266741	0.0425386	0.246613	0.224352	0.0265088	-0.0776719	-0.0793959	0.0585926	0.306133	0.0736405	-0.191138	-0.0757003	-0.00572293	0.147906	-0.0715777	0.0305962	-0.129133	-0.275329	0.232415
P677	0.371945	-0.0986059	0.120196	-0.0359495	0.142182	0.319825	0.500149	0.285186	0.218949	0.106035	0.282852	0.194215	-0.0249097	-0.142098	-0.126347	0.160199	0.392078	-0.091241	-0.111621	0.0436487	-0.0468352	0.231352	0.115015	0.000577739	-0.221385	-0.475214	0.317872
P678	0.538087	-0.246904	0.152337	-0.00589739	0.147024	0.290403	0.527979	0.355888	0.388753	0.0365923	0.225746	0.256999	-0.0980319	-0.158177	-0.181826	0.165046	0.632353	-0.135196	-0.377776	-0.0985904	-0.0882333	0.164836	0.32087	-0.0384917	-0.0746001	-0.655635	0.360795
P679	0.070094	0.0377226	0.0661482	-0.00111275	0.0501138	-0.0473071	-0.0724342	-0.00393651	-0.0140999	-0.072281	-0.0384078	-0.0856396	-0.098409	-0.00602002	-0.0240876	0.0729786	0.0163968	-0.126018	0.0374477	0.0411488	-0.0379795	-0.115439	0.140878	-0.137544	0.0614972	-0.0622945	-0.0630808
P680	0.015044	0.0255168	0.00951576	-0.202324	-0.0735771	0.0470519	0.111667	0.123193	0.15681	0.17847	0.218889	0.141049	0.18352	0.0997253	-0.0127838	0.13191	0.071195	0.049176	-0.192531	-0.0535427	-0.016337	0.131583	-0.178586	0.0373018	-0.154595	-0.0086729	0.178386
P681	-0.0920327	-0.148396	-0.0648789	0.0718666	-0.0463944	0.012015	0.0910584	0.0675388	-0.0463024	-0.0613394	-0.0528813	-0.0529918	-0.0111688	-0.0436158	0.0150033	0.113611	-0.0986409	-0.0209756	-0.107331	0.0451078	0.24339	0.0633226	-0.0401936	0.0182678	-0.115377	-0.0651024	0.192777
P682	0.121267	-0.301357	0.0499328	0.00911093	0.165345	0.229985	0.403449	0.228429	0.379684	0.239855	0.0652522	0.277695	0.0437246	-0.180536	-0.187794	0.219416	0.215933	-0.204132	-0.343164	-0.11643	-0.137645	0.187909	0.161297	-0.0952173	-0.0876352	-0.46388	0.360813
P683	0.375206	-0.0718172	0.179934	-0.144564	0.241385	0.156845	0.559123	0.273565	0.256562	-0.0949925	0.268527	0.251239	-0.0313769	-0.117251	-0.114542	0.267896	0.548315	-0.151245	-0.256354	0.073299	-0.0874936	0.278973	0.202362	-0.0202981	-0.137312	-0.451034	0.295339
P684	0.425112	-0.213836	0.1627	-0.113736	0.0552681	0.234948	0.409883	0.331647	0.333288	-4.55431e-05	0.165944	0.273513	0.092055	-0.207202	-0.0662855	0.186089	0.493023	0.0313982	-0.237325	-0.0888485	0.0289892	0.126149	0.305216	-0.199265	0.0712548	-0.415338	0.300761
P685	0.228158	-0.166929	-0.0417151	-0.0851368	0.239464	0.317619	0.457023	0.421721	0.224362	0.0837747	0.134014	0.237603	0.0639669	-0.0352893	-0.126514	0.0976503	0.219974	-0.0842779	-0.369691	0.00604488	0.199466	0.197986	0.075698	0.0561354	-0.18022	-0.440221	0.362794
P686	-0.391656	0.189331	-0.141832	0.198451	-0.201181	-0.36276	-0.606803	-0.414033	-0.279064	0.0264225	-0.131542	-0.266312	-0.093579	0.0822818	0.0484736	-0.158063	-0.49393	0.224398	0.325739	-0.0387096	0.0705584	-0.181344	-0.238277	0.0852722	0.192497	0.646852	-0.380705
P687	0.37668	-0.246929	0.0956701	-0.0957481	0.0856191	0.207124	0.448444	0.25053	0.382433	0.0226533	0.103553	0.0961106	0.030211	-0.167006	-0.127215	0.206416	0.467683	-0.100836	-0.317465	-0.0765507	0.102253	0.0785416	0.0969485	-0.0452354	-0.140931	-0.439738	0.292014
P688	0.283446	-0.0631047	0.184709	0.0140419	0.209312	0.175845	0.578438	0.368131	0.314709	-0.0516359	0.278697	0.240174	0.0340188	-0.200489	-0.119264	0.249463	0.406854	-0.203548	-0.369543	-0.0734885	-0.0905763	0.225834	0.0706221	-0.00848274	-0.262043	-0.610418	0.357653
P689	0.321788	-0.126788	0.0854228	-0.0516982	0.185866	0.289911	0.536606	0.319775	0.406552	0.0295285	0.154484	0.229407	-0.0271411	-0.034085	-0.0326612	0.216503	0.367044	-0.117242	-0.390792	-0.0548137	0.00541172	0.330883	0.0774906	0.0653498	-0.15743	-0.430691	0.374363
P690	0.0207	0.107777	-0.0603005	0.140013	0.0667549	0.0188052	-0.148926	0.0610318	0.0645842	0.0367131	0.344588	0.199962	0.0730477	0.110173	0.0728528	0.0737602	-0.0648728	0.128036	0.0618867	-0.111195	-0.0556548	0.0492851	-0.166258	0.0209532	-0.140738	0.149581	0.00334794
P691	-0.0907955	-0.119087	0.0033891	0.133573	-0.0482655	0.0135221	0.0588274	0.128087	0.0457395	0.031892	-0.0779215	-0.0516659	-0.0555966	-0.0728891	0.0275963	-0.00371506	-0.0756919	0.00323223	-0.100061	-0.168259	0.136292	0.102895	-0.0671702	-0.105407	-0.0526994	-0.1412	0.122803
P692	0.150239	-0.00219429	-0.013044	0.00242043	0.186249	-0.0435394	-0.0767419	-0.014893	0.0746	-0.0647021	0.250506	0.257765	0.215428	0.0267857	0.0217516	0.225524	0.136356	0.109093	0.131658	-0.0104371	0.0319324	-0.0274178	-0.128772	0.101402	-0.0924552	-0.104544	-0.0600484
P693	0.412843	-0.29567	0.151931	0.0107246	0.160879	0.309051	0.439116	0.380171	0.386618	0.0515585	0.205825	0.220145	0.0638776	-0.150073	-0.0610008	0.239696	0.572136	-0.100962	-0.324178	-0.135985	0.0397474	0.216963	0.125748	-0.0718703	-0.072917	-0.477985	0.333731
P694	-0.301196	0.348779	-0.0548821	0.352123	-0.210908	-0.262019	-0.592564	-0.296904	-0.319719	-0.121508	-0.0187881	-0.205713	0.0285067	0.0577516	0.0799253	-0.161401	-0.340464	0.23533	0.414498	-0.0270883	-0.136617	-0.111531	-0.181671	0.0975266	0.133604	0.569291	-0.291195
P695	0.168978	-0.171731	0.093051	-0.0644724	0.0473413	0.144235	0.480014	0.321933	0.111611	0.00890062	0.0512673	0.0888497	-0.0657488	-0.14885	-0.0660655	0.130899	0.211139	-0.13473	-0.228482	-0.0509106	0.127719	0.210339	0.162155	-0.0940995	-0.157265	-0.505725	0.283581
P696	0.332729	-0.258439	-0.0144676	-0.0826125	0.142092	0.226635	0.42068	0.37695	0.340541	0.233593	0.232103	0.370769	0.132396	-0.0987873	-0.102873	-0.0274618	0.450507	-0.156129	-0.357708	0.00390633	-0.0925559	0.0968692	0.287278	-0.167697	0.00301332	-0.506389	0.247049
P697	-0.0339022	-0.0512479	-0.0358307	-0.062799	0.165009	0.0722609	0.339381	0.205944	0.0382231	-0.0899843	-0.0767092	0.0290124	-0.128675	-0.0561646	-0.00861951	0.213245	-0.023905	-0.194365	-0.258759	0.0546371	0.0791702	0.11058	-0.131965	-0.0331069	-0.186312	-0.233916	0.192345
P698	-0.102788	0.142038	0.0252499	0.153974	-0.0153418	-0.0228963	-0.293939	-0.146092	0.0671278	0.0494583	-0.012202	-0.0397758	-0.036199	-0.0822571	0.0490425	-0.129738	-0.186032	0.0512417	0.22853	-0.040863	0.0769491	0.08979	-0.0758031	0.0750802	0.17121	0.136298	-0.261422
P699	-0.167871	0.22172	-0.140602	-0.20142	-0.190771	-0.208879	-0.0395659	0.0207175	0.0986523	0.141319	-0.0244308	0.0600656	0.116885	0.1405	0.269969	0.0359244	-0.131449	0.148805	0.0704754	-0.0625476	0.0727723	-0.0978404	-0.126349	-0.0114321	-0.16168	0.32264	-0.103328
P700	-0.351848	0.165122	-0.164986	0.130647	-0.196131	-0.343511	-0.461133	-0.291826	-0.17937	-0.000593813	-0.175538	-0.167432	0.0754344	0.0127953	0.0552107	-0.0327975	-0.401405	0.0292542	0.396997	0.0613742	-0.0394769	-0.164435	-0.109687	0.0654902	0.102762	0.601334	-0.39667
P701	0.0978782	-0.134443	-0.0672651	-0.0905516	-0.0520074	0.12821	0.031108	0.107922	0.262024	0.227938	0.295423	0.444757	0.448621	0.110744	0.0316697	0.0467628	0.13134	-0.0298309	-0.165352	-0.0285982	0.0707393	0.131111	0.00356813	0.00396047	-0.116612	-0.0756608	0.0690537
P702	0.644202	-0.266473	0.213047	-0.0474372	0.133072	0.247302	0.497318	0.326044	0.304057	-0.0633826	0.170217	0.234058	0.0175128	-0.153483	-0.153341	0.179197	0.790672	-0.0285798	-0.295765	-0.132756	-0.0932465	0.074881	0.337729	-0.112353	-0.0968973	-0.589523	0.415706
P703	-0.0242151	0.158738	0.246357	-0.0935542	0.0297169	0.0797889	0.339545	0.0885156	-0.0317285	-0.0539774	0.000378691	-0.105435	-0.121588	-0.099179	-0.0656558	0.00149825	-0.0130583	-0.248317	-0.125269	-0.0270172	-0.185794	0.0471471	0.0392593	-0.0647702	-0.153796	-0.282322	0.0391063
P704	0.0209595	-0.0583404	-0.00333696	0.229105	-0.0825962	-0.0705036	0.00941239	0.0117702	-0.0623706	0.0105739	0.0501971	0.0734782	0.0855858	-0.0728891	-0.0882662	-0.0179874	0.00289384	-0.0219313	0.0519329	0.101869	-0.0467967	0.0904723	-0.0671702	0.0943998	0.0231304	-0.157671	0.0194729
P705	0.361579	-0.300378	0.0984189	-0.0920642	0.207934	0.271848	0.512972	0.316635	0.370746	0.101759	0.124395	0.260133	0.0387683	-0.173718	-0.179751	0.343595	0.480822	-0.101698	-0.353993	-0.00988995	-0.143258	0.187383	0.17126	-0.166868	-0.0423454	-0.536692	0.368692
P706	0.687329	-0.250984	0.150358	-0.1344	0.183266	0.295373	0.576877	0.377207	0.297051	0.0230165	0.206751	0.255433	-0.0477687	-0.160265	-0.188433	0.0620261	0.814522	-0.0326703	-0.394387	-0.0238016	-0.119284	0.0844465	0.280828	-0.0990641	-0.0605382	-0.638914	0.476803
P707	-0.0774733	-0.118171	-0.0409574	-0.125026	-0.0957215	-0.04261	-0.0570357	-0.0380917	0.181967	0.193292	0.170694	0.270613	0.264392	0.0483406	-0.0268974	0.118378	-0.109542	0.0579359	-0.0344038	-0.0820532	-0.0903019	0.109224	-0.122316	-0.147859	-0.021164	-0.0512317	0.14549
P708	-0.220883	0.153672	-0.0132984	0.211114	-0.251618	-0.196806	-0.476301	-0.225571	-0.134066	0.00519838	0.01333	0.0164139	0.034641	-0.00305644	0.0185533	-0.112353	-0.258685	0.163413	0.380283	-0.173708	-0.0908291	-0.0571431	-0.187849	0.0640628	0.0531039	0.42916	-0.182347
P709	0.619195	-0.205834	0.108373	-0.126714	0.182987	0.320687	0.554506	0.399264	0.387306	0.0226262	0.23476	0.280958	-0.0567907	-0.0985697	-0.125183	0.0623604	0.710761	-0.0080607	-0.318098	-0.0436394	-0.111536	0.113812	0.309711	-0.0365785	-0.0343215	-0.591457	0.338003
P710	0.800612	-0.230145	0.296327	-0.0828249	0.154733	0.3181	0.560596	0.377096	0.263245	-0.0801943	0.281487	0.268353	-0.063374	-0.146646	-0.162794	0.166725	0.875945	0.0265206	-0.255067	-0.0489187	-0.0738192	0.0760294	0.421604	-0.0196256	-0.09686	-0.548832	0.36626
P711	-0.21119	0.0662944	0.168974	0.210491	0.115128	-0.0831221	-0.155549	-0.0287248	-0.250025	-0.249652	0.00652592	-0.198843	-0.0741199	-0.0814308	-0.0286655	0.156369	-0.153168	0.056597	0.0480461	0.0815009	0.00595601	-0.0332579	-0.090769	0.11717	0.0219121	0.113448	-0.203771
P712	-0.148498	0.0407061	-0.167288	0.0477938	0.0184187	-0.0237168	-0.215716	0.054949	0.164315	0.172428	0.230975	0.225426	0.248645	0.0155322	0.11768	0.0643263	-0.126323	0.225958	-0.0399055	-0.0457549	-0.0925503	0.0120229	-0.040906	0.0444875	-0.12729	0.166578	0.0458823
P713	-0.283402	0.000601162	-0.0710872	-0.172025	0.0838221	0.041903	0.146026	0.119926	0.115806	0.0828902	-0.0776505	0.033885	0.0446756	0.207422	0.153493	-0.0306859	-0.375474	-0.212705	-0.0983404	0.060386	0.153263	0.111968	-0.16934	0.00221143	-0.0271624	-0.0292666	0.153338
P714	0.184154	-0.168665	-0.00280711	-0.0718772	0.0746824	0.121688	0.348322	0.216943	0.0211904	-0.116095	-0.047782	-0.150355	-0.142609	0.125806	-0.154998	0.105356	0.0646514	-0.00607689	-0.283063	0.125614	0.27974	0.0879823	-0.0257203	0.120973	-0.193508	-0.232547	0.281761
P715	0.71614	-0.30078	0.19132	-0.115575	0.15233	0.320155	0.551297	0.345544	0.332936	-0.0438786	0.1926	0.28257	-0.0295058	-0.146646	-0.113884	0.186184	0.82886	0.00658775	-0.321991	-0.0709694	-0.111867	0.143346	0.300402	-0.0891601	-0.100955	-0.589164	0.393076
P716	-0.212764	0.365202	0.00273594	0.223573	0.0425319	-0.136979	-0.313223	-0.160841	-0.219504	-0.118215	-0.0915258	-0.0493796	-0.136864	0.214139	0.0281967	0.00495791	-0.285281	0.233626	0.431692	-0.047937	-0.00481699	-0.0136058	-0.113312	0.0596088	-0.0800026	0.310818	-0.163505
P717	-0.269809	0.257199	0.0329755	0.000673833	-0.024113	-0.0201503	-0.159366	-0.314824	-0.247131	-0.249871	-0.226559	-0.150171	-0.157154	0.159834	0.0612067	0.061291	-0.24733	-0.0278767	0.197503	0.0778919	0.211645	-0.0793115	-0.116885	-0.0983308	0.12438	0.204942	-0.300478
P718	-0.279668	0.233412	-0.0244824	0.166688	-0.0766359	-0.120665	-0.424807	-0.100921	-0.000818037	0.132505	0.175442	0.232672	0.116483	0.0604534	0.0738283	-0.153179	-0.363568	0.174334	0.257873	-0.140074	-0.0575002	-0.0638607	-0.163175	0.162349	0.0983206	0.378713	-0.0104562
P719	-0.272591	0.0632613	-0.0059949	0.197581	-0.0937312	-0.226925	-0.420078	-0.252196	-0.0556466	0.0115903	0.0336447	0.0715203	0.109871	-0.0426905	0.0844427	-0.130614	-0.197953	0.199101	0.184699	-0.17363	-0.105917	-0.236929	-0.119049	0.0602975	0.16884	0.301178	-0.123274
P720	-0.159667	0.0454782	0.0104462	0.0567851	-0.205023	-0.105247	-0.287659	-0.121463	0.0471948	0.116363	0.293233	0.270618	0.291519	0.119737	0.0706097	0.0371222	-0.184029	0.139581	0.245734	-0.132545	0.0207657	-0.00491054	-0.178586	0.208291	-0.0710876	0.369978	-0.121692
P721	-0.144962	-0.0574215	-0.269773	-0.108383	0.0509377	0.092756	-0.000435993	0.00415047	-0.0250603	0.0790626	-0.0715727	0.0459319	-0.0655458	0.327512	0.200175	-0.0588192	-0.224302	0.0552011	-0.050849	0.180252	0.329352	0.0793163	-0.0913973	0.0411735	-0.0770617	0.139704	0.0910142
P722	-0.402706	0.256827	-0.0704632	0.297877	-0.205152	-0.295668	-0.601588	-0.343623	-0.231389	-0.07861	-0.0669112	-0.147208	0.0840683	0.0214936	0.0796414	-0.0570934	-0.410295	0.162259	0.511124	0.0282866	-0.0111208	-0.114654	-0.222267	0.16688	0.256978	0.651586	-0.416429
P723	-0.202154	-0.0273259	0.16642	-0.0766863	0.089324	0.0248852	0.290672	0.118148	-0.0435764	-0.181524	-0.0599848	-0.118295	-0.0800824	0.0882526	-0.0547678	0.227988	-0.178511	-0.141341	-0.171642	0.121962	0.0434948	0.188561	-0.131965	-0.0664742	-0.29497	-0.215301	0.156146
P724	0.295599	-0.119507	-0.00270769	-0.0891492	0.0771981	0.244152	0.200862	0.200641	0.464853	0.146035	0.344456	0.452736	0.3253	-0.0176647	0.021143	0.159846	0.362831	0.195616	-0.245089	-0.0970762	0.0414752	0.0664317	0.0601531	0.0187401	-0.0225157	-0.217758	0.226996
P725	-0.128702	0.00269234	-0.17069	0.0555945	-0.152162	-0.261103	-0.0761593	-0.041784	-0.153465	-0.0440937	-0.0541066	-0.131561	0.101173	-0.163144	0.00114552	0.0847591	-0.0595658	-0.00852974	0.0305513	-0.134853	0.0833726	-0.109828	-0.093929	0.0768611	-0.0397371	0.0858002	0.108588
P726	-0.0917656	0.0598995	0.0460644	-0.00657348	0.187495	0.0361049	0.0151575	-0.155876	-0.175983	-0.0238596	-0.102471	-0.00154512	-0.125986	0.0893136	-0.133301	-0.067714	0.0101447	0.0530383	0.128043	0.121717	-0.0899679	-0.0460576	0.0964478	0.0205449	0.142598	0.0429537	-0.0467768
P727	0.00139699	-0.185624	-0.116948	0.0896218	-0.00715663	0.109058	-0.117183	0.0850027	0.287442	0.241936	0.429781	0.374319	0.46185	0.00874583	0.106302	0.12369	-0.0126162	0.14224	-0.0668647	-0.0206833	-0.013728	-0.0738157	-0.204992	0.225425	-0.101839	0.12824	0.0469839
P728	-0.291341	0.0990413	-0.172103	-0.00696867	-0.0440639	-0.107474	-0.121648	-0.0345787	0.0117938	0.133809	-0.023621	-0.048926	-0.0413944	-0.0251552	0.103551	-0.132922	-0.273814	0.0717363	0.0735529	0.016627	-0.101947	-0.0265868	-0.144571	0.135323	-0.0113505	0.172965	-0.120422
P729	-0.233384	-0.00545375	-0.181508	0.0776731	-0.0975906	-0.0288796	-0.418651	-0.289162	-0.0554702	0.0157167	-0.18675	-0.161305	0.148637	0.12219	0.23948	-0.117784	-0.39865	0.171916	0.217538	-0.0590987	0.146953	-0.169116	-0.222966	0.132321	0.150752	0.54582	-0.37994
P730	0.382245	-0.246184	0.125497	-0.0187777	0.267288	0.232502	0.601367	0.362102	0.253185	0.0513525	0.176648	0.221211	0.00544258	-0.177557	-0.171872	0.141119	0.458708	-0.0790398	-0.302095	0.06806	0.00765399	0.323327	0.199587	-0.0978569	-0.298696	-0.601144	0.349371
P731	0.197461	9.46465e-05	-0.138656	0.0111807	0.0157027	0.147293	0.0903965	0.124911	-0.00986709	-0.0606682	-0.0145682	0.0799968	0.0109177	-0.0568282	-0.0550473	-0.089631	0.126201	0.114302	0.02387	0.150609	0.0155487	0.201387	-0.0523694	0.188076	-0.0879483	-0.0551451	0.164811
P732	-0.394569	0.360536	-0.0750559	0.217501	-0.151685	-0.229268	-0.5515	-0.324959	-0.171538	0.0250338	-0.120562	-0.0431265	0.0346532	0.0433774	0.103342	-0.24213	-0.428032	0.198506	0.371412	-0.0526119	-0.0288011	-0.117086	-0.235053	0.0884762	0.112427	0.622872	-0.293814
P733	-0.088445	0.0203203	0.0306562	-0.124896	-0.00926876	0.00374056	0.235545	0.107642	-0.00884834	-0.0512089	0.0218382	-0.0362321	-0.0857796	-0.0778699	0.0138803	0.155158	-0.0875768	-0.25349	-0.234739	0.0585864	0.0435724	0.254561	-0.14769	0.0360713	-0.125843	-0.0761883	0.229351
P734	-0.26409	0.207227	-0.0698281	0.21268	-0.124971	-0.110839	-0.458549	-0.22452	-0.112179	-0.00398136	0.0526391	0.0569745	0.0747584	0.10012	0.135647	-0.153466	-0.237067	0.232308	0.259323	-0.134006	-0.0497842	-0.191594	-0.13514	0.0878705	0.0418491	0.347592	-0.131227
P735	-0.0443212	0.0233225	-0.145176	0.102881	0.0182982	-0.0836523	-0.174018	-0.17072	0.111658	0.181022	0.287536	0.242484	0.305978	0.0820152	0.0305799	0.0891746	-0.0702469	0.1142	-0.0669544	0.0368646	-0.0397092	-0.0258192	-0.131965	0.151221	-0.140612	0.190626	0.00416422
P736	0.572334	-0.199987	0.195301	-0.0492606	0.104529	0.290447	0.449456	0.403936	0.319585	0.00224153	0.210188	0.335383	0.0850767	-0.125606	-0.0900226	0.133305	0.73237	0.0853606	-0.309096	-0.00476592	-0.00696571	0.117788	0.298162	0.0209025	-0.0807673	-0.468549	0.465359
P737	-0.0305378	0.0978503	0.0525613	0.0290591	0.0306357	-0.0549909	0.0629494	0.113488	-0.188681	-0.0159549	-0.0356814	0.0338523	-0.0661891	-0.0136277	0.0723898	0.0128445	-0.033707	-0.00959759	0.0223309	-0.0225831	-0.0603194	-0.0719252	0.136091	-0.0354764	-0.145046	0.0298341	-0.0421461
P738	0.567016	-0.253549	0.22173	-0.175064	0.206692	0.221632	0.575626	0.317325	0.334171	0.0143562	0.13125	0.247491	-0.0216896	-0.180414	-0.175034	0.17976	0.691615	-0.124991	-0.403985	-0.0514092	-0.143521	0.13051	0.367361	-0.01793	-0.0888327	-0.61619	0.375208
P739	-0.463133	0.230041	-0.143514	0.137995	-0.160505	-0.325742	-0.624379	-0.346456	-0.198793	-0.0086291	-0.125733	-0.118651	0.0331758	-0.0392548	0.151303	-0.160292	-0.484434	0.0561022	0.354083	-0.087209	0.0263945	-0.0732371	-0.238277	0.137061	0.297609	0.583735	-0.272914
P740	0.144397	0.0559308	0.14706	-0.0396585	0.220341	0.162133	0.30769	0.154664	0.125641	-0.118749	0.157615	0.168854	-0.00700884	0.102736	0.0116549	0.241507	0.0543701	0.0345095	-0.0421571	0.0873903	0.238307	0.124104	-0.0140046	-0.0362567	-0.121811	-0.191314	0.137971
P741	-0.36032	0.162221	-0.139031	0.108025	-0.28842	-0.279358	-0.648556	-0.466038	-0.136107	0.0650687	-0.0650373	-0.0739101	0.204815	0.0714467	0.176253	-0.198702	-0.439455	0.207581	0.351821	-0.0953933	-0.0479504	-0.153635	-0.238277	0.101739	0.188258	0.576726	-0.432993
P742	-0.313644	0.242371	-0.254871	0.101984	-0.0541437	-0.258403	-0.549681	-0.392075	-0.16083	0.0268028	-0.101031	-0.166613	-0.0468283	0.332375	0.211555	-0.137468	-0.447587	0.0900337	0.376335	-0.0184469	-0.0175346	-0.134705	-0.153694	0.141562	0.0828424	0.610051	-0.402114
P743	-0.317998	0.148426	-0.170135	0.110925	-0.115883	-0.116875	-0.490193	-0.309291	-0.12969	0.00394339	-0.181541	-0.156828	0.0265938	0.039514	0.123527	-0.0986094	-0.354349	0.0922158	0.313649	-0.00905405	-0.0335704	-0.151116	-0.189678	0.0329258	0.188669	0.58139	-0.379881
P744	0.113052	-0.169876	-0.0582335	0.00811211	0.0171051	0.0778392	0.197801	0.223073	0.266876	-0.00953456	0.0948383	0.120752	0.00597466	-0.0866775	-0.0225071	0.211929	0.147941	-0.00107288	-0.2133	-0.202227	0.132833	0.0407406	-0.0798767	-0.106606	-0.105261	-0.257961	0.240684
P745	-0.222465	0.0450909	-0.0269021	0.177515	-0.167755	-0.201264	-0.358152	-0.187945	-0.0678733	0.0959771	0.164216	0.173014	0.25564	0.137287	0.0430574	-0.0736229	-0.208863	0.200018	0.120566	0.034497	-0.093253	-0.168211	-0.122316	0.0202436	-0.0540676	0.289123	-0.0938677
P746	0.308566	-0.119972	0.0826789	-0.0183407	0.0447348	0.0710992	0.161229	0.136039	0.224178	0.0721402	0.429765	0.433534	0.375195	0.0256343	-0.0159598	0.204212	0.296333	0.0105457	-0.182211	-0.00901722	-0.0391322	0.0257934	0.0660926	0.172628	-0.108867	-0.209991	0.27549
P747	0.729281	-0.225712	0.228287	-0.126648	0.134746	0.239649	0.485889	0.276801	0.224631	-0.112038	0.22939	0.262802	-0.0158421	-0.0735626	-0.148477	0.194799	0.799821	0.097182	-0.245242	0.0907025	-0.100874	0.127771	0.435311	-0.00418438	-0.0592227	-0.4915	0.361188
P748	-0.17778	0.279448	-0.0473143	0.180543	-0.146889	-0.148255	-0.351466	-0.134572	-0.0157864	0.0384196	0.0862069	0.0239794	0.0708206	0.0625642	0.109918	-0.0917562	-0.279421	0.220071	0.187983	-0.116487	-0.0269416	-0.141254	-0.125556	0.0641477	-0.020626	0.380893	-0.105817
P749	0.0240078	-0.0401696	0.0591331	-0.00760688	0.0166077	-0.0111636	0.0238079	0.064143	0.206679	0.0565251	0.385353	0.362229	0.283197	-0.136246	0.0154976	0.133534	0.148311	0.0439092	-0.122305	0.0272406	-0.0918469	0.159768	-0.125556	0.100156	-0.235147	-0.0930421	0.0940652
P750	0.0868197	0.0151711	-0.0961854	-0.0444744	0.104542	0.00209708	-0.0302572	0.0699207	0.256787	0.244069	0.382549	0.341375	0.362367	0.0399662	0.0644957	0.0625741	0.0297498	0.065735	-0.0655469	-0.0967091	-0.0375338	-0.00247655	-0.13514	0.206675	-0.0593504	0.0450533	-0.0273785
P751	0.13983	-0.0779659	-0.0363882	-0.169963	0.0437479	0.0807935	-0.140148	-0.0391619	0.227991	0.222475	0.346915	0.337427	0.393234	0.150973	-0.057794	0.0187069	0.0534568	0.141355	-0.0797991	0.00764931	-0.150978	0.00829263	-0.0692987	0.145171	0.0563677	0.0823279	-0.0104182
P752	0.368307	-0.185683	0.21364	-0.0241653	0.119632	0.264169	0.399102	0.317718	0.256675	-0.0596594	0.143483	0.178964	0.0188419	-0.121989	-0.0394758	0.0868879	0.4605	-0.08304	-0.245994	-0.0543998	-0.0152867	0.0794355	0.207572	-0.0361004	-0.126083	-0.476324	0.260499
P753	0.462912	-0.30309	0.0776103	-0.18541	-0.0179388	0.251654	0.284073	0.179506	0.350641	-0.0194148	0.208312	0.266039	0.0342474	-0.103148	-0.132443	0.0427919	0.454672	0.0468744	-0.253831	-0.139719	0.016342	0.133324	0.156639	0.0308499	0.0649252	-0.40593	0.323795
P754	-0.223588	0.1531	-0.000644112	0.305391	-0.00984752	-0.0850542	-0.54698	-0.222054	-0.247314	-0.0723456	0.00645579	-0.0624995	-0.0969445	0.077932	0.0929502	-0.180574	-0.205526	0.193307	0.274232	0.0226966	-0.128057	-0.0550499	-0.138298	0.08432	-0.0144727	0.263549	-0.240601
P755	0.134935	-0.23479	0.0757874	0.085993	-0.0497099	-0.0165034	0.0348586	0.0930521	0.0967404	-0.0322098	0.190314	0.196926	0.155133	-0.0822571	-0.0770125	0.12488	0.182521	0.0121348	0.00701505	0.090197	0.124657	0.0745601	0.060654	0.206161	0.00872369	-0.131795	0.101605
P756	-0.236489	0.236604	-0.123971	0.154443	-0.0150176	-0.221796	-0.354979	-0.103459	-0.0421227	0.0574235	0.264334	0.162024	0.165922	0.0277653	0.172844	-0.0868011	-0.247746	0.161965	0.261028	0.0917544	-0.0179299	-0.0415732	-0.125556	0.167187	-0.0404847	0.33543	-0.208525
P757	-0.196228	0.18799	-0.0322103	0.0238663	0.0625055	-0.0644589	-0.280658	0.0185128	0.0154408	0.122309	0.290141	0.171367	0.174221	0.123504	0.118931	-0.164945	-0.258962	0.199244	0.0862338	0.0376755	-0.00228045	-0.132819	-0.128772	0.0820101	0.0556967	0.224069	-0.00955301
P758	0.0283839	-0.0601064	-0.212166	-0.0396279	-0.0498625	0.00185542	-0.0364695	0.0213702	0.279844	0.355282	0.353944	0.414421	0.378782	0.0976229	0.0458638	-0.016752	0.0106444	0.053691	-0.184845	0.00812958	0.133422	-0.0260503	-0.0590384	0.187979	-0.0663593	0.0477407	0.16068
P759	0.49347	-0.139586	0.242862	-0.0821784	0.100082	0.26594	0.527063	0.306216	0.36445	-0.101539	0.180568	0.149171	-0.0720809	-0.153483	-0.0826003	0.244137	0.586222	-0.120289	-0.343254	-0.140795	-0.0286066	0.0546985	0.211245	-0.115704	-0.061847	-0.548351	0.340545
P760	-0.187639	0.239812	-0.0446828	0.210683	-0.00203179	-0.100774	-0.406045	-0.0488001	-0.0699355	0.0558138	0.243085	0.108456	0.161575	0.0105724	0.113137	-0.136673	-0.212385	0.223035	0.267224	-0.0242894	-0.0567925	0.0165277	-0.125556	0.225144	-0.0353625	0.295057	-0.191033
P761	-0.229622	0.144897	-0.124725	0.0800909	0.00900753	-0.12258	-0.275452	-0.0713331	-0.0458763	0.0697244	0.207519	0.13855	0.137041	-0.00563817	0.0816406	0.0167726	-0.280665	0.0997498	0.30811	-0.0149092	0.0151186	0.0715714	-0.138298	0.171109	-0.0499622	0.270589	-0.0527535
P762	-0.196977	0.239757	0.081552	0.217324	0.0292258	-0.0748536	-0.388919	-0.135002	-0.0761832	0.00316573	0.209531	0.194991	0.105669	0.0402709	0.123288	-0.108439	-0.178292	0.327251	0.254876	-0.101562	-0.0501241	-0.00956515	-0.131965	0.109941	-0.00874662	0.224946	-0.0636988
P763	-0.0918852	0.198087	-0.0899046	0.118998	0.0521813	0.0158415	-0.30045	-0.116399	-0.129406	-0.0453498	0.211898	0.0337718	0.0272332	0.0741206	0.12285	-0.137454	-0.230435	0.157026	0.191329	0.0892115	-0.0639872	0.11199	-0.115751	0.158876	-0.172979	0.323468	-0.156663
P764	-0.0572322	0.101056	0.10682	-0.0929901	0.085371	-0.064189	0.260306	-0.0633717	0.0484058	-0.18001	-0.0232586	-0.104832	-0.132254	-0.0909585	0.0150695	0.103609	-0.00240748	-0.197945	-0.038837	0.0994018	-0.0543237	0.08864	-0.0838218	-0.0383715	-0.180418	-0.19287	0.0670101
P765	0.557826	-0.204056	0.259921	0.0945929	0.148563	0.312318	0.340708	0.220596	0.0663825	0.0464248	0.152774	0.234101	-0.00433783	-0.103148	-0.110209	-0.0217534	0.605023	-0.0389374	-0.253831	0.018932	-0.0840315	0.0565382	0.494421	-0.0256188	0.0635951	-0.363844	0.3639
P766	0.0807039	-0.093158	-0.0836719	-0.0769115	0.0465259	0.0117515	0.0266571	0.121762	0.196749	0.0854155	0.410689	0.432213	0.299688	-0.011781	-0.0113829	0.156175	0.146899	0.105983	-0.0896903	0.0701561	-0.0228213	0.100042	-0.141441	0.0618986	-0.179887	-0.144278	0.166346
P767	-0.108533	0.170805	0.0200999	0.184611	0.04731	-0.145901	-0.433631	-0.0230848	-0.0998286	-0.0972185	0.216903	0.172035	0.0980037	0.168824	0.171166	-0.102972	-0.215085	0.245249	0.363651	0.0674217	-0.15864	-0.0201522	-0.102163	0.140444	0.029205	0.221217	-0.184604
P768	-0.0942772	0.0429417	-0.118488	-0.016619	-0.0208291	-0.136436	-0.258877	-0.0767077	0.0707575	0.148353	0.247355	0.283097	0.375056	-0.0394539	0.10062	0.0257512	-0.0674748	0.124635	0.0651788	-0.114684	0.0299158	-0.0140749	0.00695662	0.150968	0.0416074	0.165654	-0.0972301
P769	0.273772	-0.0572888	0.0108489	-0.0318872	0.197663	0.181413	0.210936	0.206201	0.425005	0.230049	0.460501	0.481681	0.45694	0.0934098	0.0271922	0.116031	0.288897	0.0995699	-0.242133	-0.0816268	0.00189159	0.133757	-0.0394616	0.0294104	-0.100155	-0.15294	0.170444
P770	-0.039195	-0.0980058	0.218603	-0.05325	0.110572	0.0997908	0.246257	0.144146	0.167339	-0.183329	0.0160266	0.0553933	-0.0720428	-0.107039	0.0426946	0.341876	-0.0278219	-0.0466803	-0.132973	-0.0558504	-0.020195	0.180212	-0.0986406	-0.121242	-0.177087	-0.271955	0.159329
P771	0.0400049	-0.0235552	0.283281	0.0420047	0.190294	0.139138	0.306845	0.171028	0.0168837	-0.150581	0.00897746	0.0037333	-0.0341667	-0.099179	0.115849	0.335761	0.162938	-0.138711	-0.244064	-0.111222	0.00635713	0.142747	-0.0913973	-0.121792	-0.236347	-0.327453	0.254361
P772	0.0244281	0.128208	0.250272	-0.0397747	0.133525	0.151631	0.264829	0.0812512	0.0329613	-0.177394	-0.095492	-0.0404273	-0.120139	-0.0728891	0.0441581	0.0800167	0.0777977	-0.117168	-0.101272	-0.0672916	-0.144343	0.0119	-0.0671702	-0.0901731	-0.241398	-0.304416	0.0458447
P773	-0.0711806	0.0361774	-0.114745	-0.124385	0.0843795	0.0501392	-0.0689647	0.123035	0.192867	0.145844	0.398143	0.393801	0.325677	-0.0601149	0.0717139	0.166202	-0.050594	0.165247	0.0454579	-0.0153231	-0.0682123	0.102719	-0.160088	0.0602534	-0.10897	0.00692474	0.061574
P774	0.0880564	-0.0103955	0.259716	-0.12826	0.110951	0.0619517	0.359296	0.182959	0.0631986	-0.208004	0.0461133	-0.0548121	-0.029138	-0.110861	0.0182827	0.26145	0.211498	-0.072458	-0.221529	-0.222864	-0.0511255	0.086203	0.0130572	-0.204834	-0.297991	-0.422708	0.25274
P775	0.0298317	0.0184187	-0.0966052	-0.10975	0.1175	0.000296818	-0.0475145	0.0268564	0.087186	0.0522199	0.228799	0.300324	0.179751	0.150943	0.0682649	0.0424059	-0.00270255	0.238176	-0.0332613	0.100433	-0.0815613	-0.0382788	-0.128772	0.0396748	-0.0973326	0.0268153	-0.0285063
P776	-0.0439657	0.0560351	0.0123824	0.0747331	0.0264638	-0.0193712	-0.101175	-0.100171	-0.0283994	-0.0435674	0.295928	0.218954	0.197188	0.0780346	-0.0248905	0.0212956	-0.0139531	0.201229	0.104836	0.0570723	0.159329	-0.00737978	-0.102163	-0.00195708	-0.0465058	0.14209	-0.0717966
P777	-0.105992	0.0303431	0.00177846	-0.163499	0.178661	0.0714344	0.248827	0.0891194	0.108158	-0.0235915	-0.128281	-0.00541672	-0.0680867	0.0227396	0.0102879	0.11998	-0.0636908	-0.268711	-0.0283544	0.0842566	0.0222438	0.133387	-0.0838218	-0.140837	-0.0780717	-0.137976	0.104054
P778	-0.236197	0.14542	0.0200734	0.222205	-0.080356	-0.0951211	-0.457197	-0.0903147	-0.106001	0.0921034	0.046723	0.0161323	0.0755363	0.0969095	0.0216127	-0.191106	-0.293829	0.0826799	0.367552	0.0343259	0.056353	-0.0950175	-0.190945	0.128947	0.0295069	0.44212	-0.177562
P779	-0.222516	0.138786	-0.0364904	0.252715	-0.151547	-0.14372	-0.464358	-0.109382	-0.0639386	0.0921965	0.180984	0.179771	0.137946	0.0896866	0.162092	-0.100841	-0.326388	0.235925	0.228851	-0.181566	-0.075615	-0.152129	-0.14769	0.156669	0.0199029	0.344368	-0.212503
P780	-0.0920327	-0.148396	-0.0687393	0.0745987	-0.0455541	0.0142347	0.0894926	0.0687463	-0.0443302	-0.0589108	-0.0567672	-0.0509374	-0.00898956	-0.0436158	0.0196689	0.107097	-0.0986409	-0.018978	-0.107331	0.0489747	0.243837	0.0615249	-0.0401936	0.0168933	-0.115025	-0.0629603	0.191552
P781	-0.158596	0.189917	0.00980317	0.287722	-0.0897512	-0.270997	-0.443137	-0.207409	-0.126523	-0.0411806	0.136729	0.0536405	0.155955	-0.0674191	0.0691516	-0.0407101	-0.138029	0.220801	0.226907	-0.0460295	-0.123723	-0.025527	-0.13514	0.125056	-0.15316	0.280163	-0.179466
P782	-0.0852563	0.188986	0.104101	0.259831	-0.00847337	-0.0396029	-0.407305	-0.0638704	-0.29039	-0.110754	0.0782216	0.0158209	0.164148	0.158692	0.0755297	-0.147008	-0.157034	0.29957	0.415874	0.0886748	-0.022631	-0.00372725	-0.122316	0.0403285	-0.0315399	0.308182	-0.190318
P783	-0.323862	0.108703	-0.128618	-0.0565269	-0.0176656	-0.0599285	-0.0751784	-0.16879	-0.0426135	-0.0475151	-0.309504	-0.163564	0.0343976	-0.00422028	0.127073	-0.102305	-0.347116	-0.136209	-0.0773049	-0.0115696	0.152223	-0.110279	-0.141441	-0.144422	0.214682	0.097815	-0.240314
P784	0.360619	-0.164203	-0.0158057	-0.0380038	0.0921807	0.150776	0.247645	0.231354	0.39236	0.164156	0.423056	0.447924	0.28113	0.0164433	-0.0400639	0.23386	0.397785	0.122035	-0.267476	0.00865754	0.0950744	0.149925	0.0669114	0.129575	-0.177969	-0.273321	0.281984
P785	0.34233	-0.0309938	0.133583	-0.131019	0.139277	0.144555	0.255086	0.117119	0.149411	-0.226488	0.112581	0.123413	-0.152746	0.0562998	0.0612106	0.256462	0.408289	0.0284186	-0.0500181	-0.0956202	-0.0225542	0.0388586	0.232144	-0.047926	-0.031902	-0.220392	0.179063
P786	0.526798	-0.1233	0.244232	-0.0464533	0.170154	0.290244	0.541278	0.329871	0.200155	0.0724474	0.196432	0.252152	-0.0444125	-0.132731	-0.214869	0.171594	0.653576	0.0423941	-0.275207	0.0350551	-0.116652	0.127714	0.312447	-0.00459937	-0.0885313	-0.472675	0.310621
P787	0.465048	-0.146804	0.175296	-0.192404	0.101388	0.122209	0.395721	0.272764	0.19774	-0.0616047	0.157335	0.179848	-0.0311286	-0.107039	-0.0898595	0.160905	0.586262	0.00804747	-0.209854	-0.171169	-0.0277212	0.127527	0.457661	-0.129258	-0.0249977	-0.447041	0.274529
P788	-0.138923	0.0667451	-0.219753	0.0448066	-0.0144888	-0.0927575	-0.371597	-0.124547	0.139561	0.335557	0.290729	0.233345	0.120353	0.128435	0.0185867	-0.0932135	-0.242513	0.248304	0.0684412	-0.0619668	-0.158876	-0.0458896	-0.190945	0.162274	-0.0435645	0.29431	-0.0204317
P789	0.0305989	0.00816281	0.0828576	0.148395	0.109683	0.0999999	-0.0190577	-0.0127067	0.196053	0.0279509	0.352346	0.325434	0.0602695	0.0001535	0.146222	0.100674	-0.00855912	-0.0223941	-0.113465	-0.0255073	-0.00840462	0.316008	-0.130729	0.0606734	-0.0244159	-0.00779822	0.18758
P790	0.273182	-0.0922255	0.0778019	-0.0873692	0.122891	0.19764	0.381708	0.237959	0.214462	-0.0620586	0.158417	0.169157	-0.025151	-0.0409421	-0.0653986	0.174945	0.450936	0.0711276	-0.29119	-0.144938	0.0884393	0.0995147	0.0873404	-0.151502	-0.121619	-0.378225	0.363455
P791	-0.12788	0.136391	-0.0463994	0.379185	-0.0657485	-0.110639	-0.419117	-0.0145041	-0.0641896	0.0162723	0.231274	0.205561	0.167323	0.00950927	0.0170708	-0.091574	-0.23368	0.204774	0.270781	0.0850263	-0.0350304	0.0297381	-0.128772	0.186884	-0.0533747	0.252436	-0.0158665
P792	-0.0966029	0.309982	0.0228174	0.270158	-0.0105292	-0.176009	-0.364254	-0.155777	-0.159492	-0.131414	0.244877	0.197723	0.181916	0.112235	0.146803	-0.0781235	-0.1297	0.208223	0.320196	-0.0149846	-0.00938019	-0.107947	-0.0986406	0.108328	0.0148589	0.242878	-0.196121
P793	-0.182896	-0.124009	0.0803472	0.00612915	0.0426446	0.0226918	0.213545	0.16265	0.0762437	0.0406756	-0.0678162	-0.0383038	0.0150105	-0.0866775	-0.119429	0.209175	-0.196029	-0.195432	-0.2133	0.0137092	0.0548439	0.148147	-0.0798767	-0.212719	-0.109868	-0.280698	0.205637
P794	0.091711	-0.153218	0.0193724	-0.0124008	0.0296151	0.063219	0.012805	0.0816046	0.249016	0.117883	0.38868	0.403717	0.247769	0.0311928	-0.00165532	0.149635	0.0378613	0.149673	-0.136074	-0.0160783	-0.0635521	0.117036	-0.122316	0.149584	-0.109194	-0.158836	0.162207
P795	0.443323	-0.0332966	0.140231	-0.155804	0.0818996	0.0736548	0.302066	0.1599	0.296117	-0.147937	0.200839	0.163373	-0.0582603	-0.0866775	0.121767	0.271217	0.491441	0.0192036	-0.2133	-0.0428425	-0.141464	-0.0545557	0.0448454	0.0586174	-0.0393073	-0.290736	0.270884
P796	-0.281597	0.105159	-0.141957	-0.00807774	-0.21084	-0.211427	-0.428834	-0.171903	0.0258078	0.228525	0.171324	0.174377	0.111364	0.0109287	0.0752133	-0.184224	-0.2857	0.138496	0.135214	-0.122461	-0.0643256	-0.0165071	-0.141441	0.123501	0.0776446	0.36371	-0.0390449
P797	0.108898	-0.145439	0.179167	-0.0348247	0.0158568	-0.0295247	0.303644	0.238782	0.120834	-0.0292608	0.176121	0.0642651	0.0288331	-0.136246	-0.0635626	0.0440975	0.19689	-0.0642186	-0.221658	-0.120124	-0.0158791	0.0542213	-0.019095	-0.152272	-0.184274	-0.496126	0.331083
P798	-0.20031	0.225546	-0.0115727	0.231502	-0.0165567	-0.143283	-0.461907	-0.151195	-0.0664378	0.0675032	0.165716	0.203981	0.210834	0.204108	0.180125	-0.103525	-0.234044	0.198113	0.223508	0.00468716	-0.0828645	-0.11459	-0.128772	0.142656	-0.046372	0.316608	-0.260515
P799	-0.264307	0.112374	0.101239	0.180737	-0.131813	-0.217476	-0.403986	-0.177183	-0.0630025	0.0942101	0.087993	0.13083	0.207053	0.0876361	0.0510748	-0.0977894	-0.259675	0.230589	0.165094	-0.0798236	-0.0905226	-0.129013	-0.141441	0.0622361	-0.0564376	0.308777	-0.115785
P800	0.164729	-0.0867074	0.0854229	-0.061269	0.132877	0.073269	0.0123749	0.0537101	0.214473	0.0759343	0.481561	0.377363	0.357113	0.0972634	0.0780377	0.202588	0.182478	0.140904	-0.107384	-0.0412655	0.0588855	0.00281226	0.0685326	0.0726313	-0.160696	-0.151387	0.128555
P801	-0.150278	0.099306	0.0610198	0.142963	-0.0704422	-0.13859	-0.36253	-0.0864025	-0.00612024	-0.0678329	0.206895	0.214596	0.126046	0.0064684	0.137489	0.0368256	-0.21225	0.233602	0.29211	-0.0903764	-0.102088	-0.00749601	-0.156998	0.0490514	-0.0478432	0.283874	-0.0659099
P802	0.111755	-0.181243	0.0442355	-0.035993	0.0485288	0.0814654	0.198902	0.0542237	0.0638752	-0.0422857	-0.0189999	0.0173486	0.0391851	-0.0728891	-0.0487742	0.197159	0.163192	0.0265748	-0.179369	-0.0501182	0.123081	-0.0728687	-0.0671702	-0.0541359	0.006078	-0.230388	0.253209
P803	0.235256	-0.13385	0.0171654	-0.0348122	0.0304891	-0.00469394	0.273508	0.393426	0.187686	0.162113	0.112067	0.171325	-0.0281487	-0.103148	-0.0595897	0.0455897	0.303443	0.0168961	-0.253831	-0.0863315	0.0401176	0.00831332	0.356869	-0.179332	-0.0894413	-0.324003	0.168228
P804	-0.154325	0.200918	0.0541145	0.325041	-0.00601025	-0.16509	-0.428247	-0.179408	-0.164234	-0.122754	0.164725	0.0975254	0.00443332	0.145172	0.0745784	-0.0815044	-0.197162	0.257053	0.297538	0.00230234	-0.160169	-0.0531309	-0.122316	0.0565944	-0.062008	0.2295	-0.120665
P805	-0.00190174	0.066521	0.0606676	-0.0261096	0.0498381	0.0653845	0.314612	0.204173	0.1218	-0.00443082	-0.0113224	0.0610548	-0.0603301	-0.143201	-0.0824725	0.00795646	0.0595088	-0.121135	-0.216702	-0.0402726	-0.0319382	0.115572	-0.131965	-0.00345116	-0.222782	-0.37142	0.262227
P806	-0.0721594	-0.00364297	0.0503988	0.111567	-0.0128317	-0.0112777	-0.0762792	-0.023657	0.115764	0.0593906	0.160352	0.182099	0.206348	-0.129185	0.0353969	0.13756	0.0252531	0.0946949	-0.0192191	-0.038748	0.0457615	-0.0444802	-0.119049	0.105122	-0.101454	0.0412951	0.074331
P807	-0.172731	0.0548888	-0.0988006	0.0618866	-0.0695998	-0.0202377	-0.320201	-0.0230909	0.0448521	0.163546	0.276546	0.208592	0.252792	0.108462	0.204738	-0.156943	-0.293698	0.228985	0.0388635	-0.0493636	-0.0602503	-0.079773	-0.138298	0.0885917	-0.0931387	0.268323	-0.103707
P808	-0.163894	0.00592393	0.257814	-0.0390079	0.145911	0.0295791	0.222367	-0.0252037	-0.00294196	-0.0936418	-0.00647873	-0.0223203	-0.0356721	-0.0776719	-0.169291	0.259893	0.00272885	0.0157069	-0.1192	-0.0264159	-0.066198	0.0708041	-0.0715777	-0.098259	-0.143683	-0.295341	0.0903775
P809	0.191102	0.0303054	-0.0284417	-0.0574017	0.229262	0.183908	0.452667	0.309559	0.207783	0.0564492	0.148302	0.147969	0.0239871	0.013405	-0.113129	0.112918	0.175305	-0.0888555	-0.266632	0.106192	0.221582	0.238619	-0.0380545	0.100087	-0.234008	-0.295629	0.257567
P810	0.0590497	0.0530554	-0.127371	-0.232212	0.105603	0.106615	0.186026	0.120588	0.359292	0.193376	0.251504	0.348882	0.220916	0.13794	0.100105	0.120048	0.0527792	0.116729	-0.186833	-0.0942432	0.0684211	0.080124	-0.119049	-0.080883	-0.175713	-0.0712499	0.140799
P811	0.33865	-0.258325	0.202314	-0.00524113	0.0566034	0.171596	0.327842	0.307984	0.346581	-0.0715039	0.378741	0.387111	0.257664	-0.118329	-0.0204443	0.235009	0.40205	0.104859	-0.236338	-0.033286	0.0552223	0.080661	0.0900535	-0.0758227	-0.0683965	-0.476661	0.355995
P812	0.0479609	-0.0496495	0.0641031	0.00877297	0.0442509	0.100383	0.060546	0.0950136	0.228003	0.151633	0.205909	0.273038	0.22136	-0.0211993	-0.0119768	0.0238549	0.151897	-0.0087745	-0.124356	0.00913929	0.0430606	0.18974	0.0227453	-0.0134657	-0.101888	-0.17269	0.129986
P813	0.545857	-0.194684	0.179586	-0.0438395	0.146849	0.284372	0.54848	0.386034	0.372977	0.0155708	0.275191	0.26939	0.0292542	-0.153483	-0.128609	0.183067	0.641109	-0.117698	-0.337743	-0.17551	-0.0828282	0.0991188	0.340212	-0.0362758	-0.0727588	-0.611981	0.413741
P814	0.517293	-0.11589	0.0931324	-0.0258688	0.0426652	0.0496131	0.310969	0.228491	0.288236	-0.154974	0.14103	0.127719	-0.128868	-0.0728891	-0.1065	0.274016	0.446955	0.0226825	-0.111179	-0.134193	-0.127079	0.115147	0.229269	0.0944298	-0.114841	-0.253075	0.122865
P815	-0.0715683	-0.204976	-0.132092	0.0367656	0.0232042	0.114411	0.102216	0.136567	0.108293	0.0130793	0.0670639	0.0896909	0.0256895	-0.0776719	0.00418272	0.162955	-0.0975899	0.0142408	-0.117772	-0.0291097	0.208673	0.113281	-0.0715777	-0.199298	-0.0840244	-0.212378	0.171822
P816	-0.020416	-0.0956076	-0.0310399	-0.239687	-0.0204818	-0.156929	0.253811	0.14255	0.22781	-0.0341075	0.181089	0.177503	0.0753944	-0.102865	0.0376611	0.260588	-0.0438147	-0.252983	-0.126118	-0.059903	0.0760831	0.225082	-0.0629265	-0.142505	-0.0628634	-0.272054	0.0455315
P817	-0.0589717	0.0651614	-0.103923	-0.1001	0.00297621	-0.158076	-0.124654	0.0801779	0.150694	0.137141	0.311219	0.250511	0.25374	0.0326394	0.0829585	-0.080565	-0.0935938	0.102265	0.0297841	-0.132075	0.0742555	0.0010697	-0.119049	0.0545654	-0.034487	0.140443	-0.00932062
P818	-0.0107638	-0.148183	0.087093	0.0477737	-0.0789367	-0.0774822	-0.1524	0.0269815	0.0274231	0.0593337	0.39125	0.318724	0.256745	0.059903	-0.0979577	0.0908709	-0.0448696	0.176939	-0.0117268	-0.133588	-0.0185797	-0.0235217	-0.0464149	-0.0968817	-0.06397	0.0683134	0.119764
P819	-0.172914	0.151236	-0.0249431	0.188748	-0.126538	-0.233396	-0.221425	-0.129584	-0.224837	-0.0269612	-0.0194279	-0.129808	-0.0385353	-0.110637	0.103257	0.0199761	-0.111423	0.0169481	0.253208	-0.00303298	0.197891	-0.150663	-0.118421	0.0389223	-0.0273318	0.246992	-0.258701
P820	-0.239601	0.110435	-0.211743	-0.0627048	-0.0931745	-0.146598	-0.351162	-0.214389	-0.118634	-0.124163	-0.0290742	-0.0443843	0.0197147	0.167015	0.283913	0.0489366	-0.410583	0.142907	0.275199	0.0889539	0.0484236	-0.0335474	-0.10273	0.0998811	0.0438165	0.385792	-0.218854
P821	-0.356127	0.284024	-0.0774929	0.105732	-0.122456	-0.278895	-0.512904	-0.334024	-0.0984266	-0.0106141	-0.153808	-0.167848	0.0856853	0.0177456	0.186688	-0.0314809	-0.375862	0.0567695	0.358589	-0.0916258	0.0544027	-0.0198825	-0.217782	0.194886	0.126751	0.575559	-0.264869
P822	-0.355559	0.173755	-0.00059503	0.302488	-0.20244	-0.255542	-0.566007	-0.401257	-0.405265	-0.226909	-0.166082	-0.241455	-0.104931	-0.0166933	0.029233	-0.0836411	-0.381794	0.290367	0.481138	-0.0250277	-0.0234951	-0.0394516	-0.128317	0.0254817	0.182038	0.527054	-0.321203
P823	-0.171682	0.127853	0.0380327	0.167648	-0.212114	-0.0638626	-0.281452	-0.0477126	-0.229752	-0.128139	-0.0428397	-0.0606045	-0.00952083	0.0474797	0.0338868	-0.00401509	-0.256319	0.247512	0.341613	0.0275895	-0.0963791	0.0242985	-0.119049	0.169047	-0.0781249	0.303541	-0.184915
P824	-0.151027	0.196351	0.106375	0.163557	-0.0585901	-0.214581	-0.332817	-0.205724	-0.0687033	-0.10267	0.130012	0.130286	0.23425	0.0474925	0.149499	-0.00129714	-0.0947574	0.285698	0.301521	-0.125774	0.0887717	0.0284813	-0.115751	0.00631874	0.0139422	0.16293	-0.212919
P825	-0.0211213	0.0462274	-0.0516263	-0.00578215	-0.00863421	-0.0684049	0.0120335	0.0686187	0.133072	0.0721204	0.324779	0.367354	0.150714	-0.0301403	0.178339	0.0292197	0.0463233	0.0227632	0.0483662	-0.0125623	-0.020234	0.276015	-0.029324	0.0137124	-0.145609	-0.0122851	0.165082

## Sheet: Liquid Spearman P value
O.T.U#	m1	m2	m3	m4	m5	m6	m7	m8	m9	m10	m11	m12	m13	m14	m15	m16	m17	m18	m19	m20	t21	t22	t23	t24	t25	t26	t27
p499	0.0577135	0.761397	0.745042	0.0738539	0.556813	0.481226	0.733818	0.720132	0.433665	0.814272	0.865456	0.414062	0.996224	0.105721	0.569064	0.434682	0.233144	0.736889	0.796346	0.455957	0.509309	0.755839	0.0138734	0.341782	0.505314	0.3148	0.432558
p500	4.52996e-06	0.000364087	0.0263073	0.325009	0.306832	0.00215884	1.66409e-11	0.000298641	0.0252885	0.621554	0.706416	0.281664	0.508159	0.225227	0.00640432	0.272723	9.04576e-10	0.0691628	6.48741e-05	0.964169	0.924397	0.0539484	0.000826611	0.154627	0.0631072	1.45728e-12	8.59942e-06
p501	0.832565	0.125347	0.390542	0.0783615	0.0639201	0.266314	0.950871	0.149917	0.198693	0.587577	0.82186	0.31356	0.26865	0.448631	0.567128	0.00948507	0.875624	0.0806825	0.609401	0.577469	0.584707	0.281819	0.477581	0.445955	0.0131897	0.712844	0.212503
p502	0.000886252	0.0340916	0.300837	0.115661	0.0388897	0.000991874	1.0556e-12	8.21142e-07	0.000298432	0.982775	0.294746	0.00257627	0.176979	0.310354	0.93192	0.152347	0.000116026	0.00448708	3.19197e-05	0.744503	0.610242	0.019567	0.0457387	0.47993	0.1598	1.74079e-11	1.81802e-05
p503	5.89453e-07	0.13684	0.471103	0.524441	0.145912	0.00128121	1.78672e-06	0.00012888	1.30726e-06	0.264032	0.000245379	7.20862e-05	0.121951	0.703267	0.117985	0.0345027	1.45505e-08	0.581559	0.000785909	0.266508	0.800831	0.0277245	0.652696	0.785633	0.372233	5.29812e-07	1.09932e-05
p504	0.54659	0.485816	0.135505	0.793999	0.502229	0.270828	0.0432113	0.160748	0.116617	0.559667	0.949739	0.211347	0.673737	0.322919	0.45299	0.94255	0.418408	0.0802675	0.949724	0.206489	0.0317926	0.0148712	0.362503	0.973721	0.986895	0.461427	0.0652338
p505	0.426123	0.745111	0.721787	0.328515	0.508801	0.262751	0.000726782	0.00515302	0.070153	0.602637	0.869548	0.149229	0.766052	0.0631675	0.281619	0.170679	0.0306008	0.850308	0.094023	0.725438	0.418057	0.0193192	0.900178	0.852912	0.00769475	0.000310678	0.0295166
p506	0.0482117	0.409191	0.146496	0.315027	0.00782541	0.0265663	2.52424e-10	0.000193513	0.0523511	0.215169	0.0620201	0.464524	0.28535	0.718283	0.438106	0.11478	0.0230911	0.136991	0.0185763	0.868765	0.035687	0.0503278	0.780259	0.50594	0.0016961	2.7348e-06	0.00166447
p507	0.950932	0.977251	0.674967	0.0944089	0.260345	0.932338	0.747808	0.881607	0.774082	0.864787	0.484192	0.296434	0.863642	0.251534	0.604707	0.555396	0.673529	0.378942	0.0773686	0.156058	0.276981	0.107204	0.539468	0.523062	0.299913	0.655477	0.567319
p508	0.0145689	0.0643944	0.93039	0.157302	0.117438	0.292302	0.0146893	0.00531929	0.0626144	0.504303	0.00393694	0.298987	0.656581	0.842936	0.58839	0.23915	0.00856304	0.518921	0.0122925	0.96859	0.544083	0.886543	0.19735	0.95156	0.0226186	0.000814323	0.000800235
p509	0.105166	0.0381727	0.964956	0.561465	0.711911	0.0584386	0.0135827	0.133993	0.0675964	0.328085	0.97649	0.979606	0.184896	0.204241	0.755891	0.0112302	0.743381	0.594071	0.00450592	0.990351	0.996032	0.954566	0.505445	0.189111	0.400134	0.123223	0.766885
p510	0.00156266	0.671991	0.0774508	0.707063	0.00852424	0.227395	1.53606e-06	3.32514e-05	0.0381723	0.1996	0.000144193	0.00205679	0.321135	0.906115	0.58549	0.000455721	5.95626e-05	0.478411	0.031959	0.560011	0.666224	0.0799139	0.203984	0.374195	0.00031016	3.08382e-06	8.31529e-05
p511	0.814454	0.262728	0.343788	0.553838	0.110419	0.0727922	0.00443653	0.175243	0.0245303	0.642605	0.81564	0.0993795	0.19197	0.876773	0.702222	0.627445	0.317358	0.329599	0.00834099	0.587872	0.0099387	0.245059	0.629504	0.422294	0.518269	0.00639572	0.0708731
p512	4.85042e-09	0.0388017	0.000292458	0.928903	0.0050605	0.00070599	1.58094e-11	2.19451e-05	0.00582338	0.274976	0.0946465	0.0321719	0.659903	0.0546494	0.25718	0.0428429	4.01901e-14	0.381545	5.90415e-06	0.75813	0.402856	0.180235	0.00753559	0.0278903	0.124361	7.99361e-15	4.78934e-07
p513	1.10334e-05	0.210677	0.000799435	0.476321	0.163995	0.00980016	5.37129e-07	0.00301937	0.00448823	0.64031	0.137179	0.126662	0.70159	0.0546548	0.15055	0.109449	8.09265e-10	0.561887	0.0143054	0.305531	0.010116	0.0647036	0.0107645	0.20345	0.408556	4.2345e-11	0.0036357
p514	0.717835	0.316568	0.800851	0.148263	0.399535	0.107669	0.360489	0.200202	0.963986	0.707833	0.419775	0.0987856	0.265661	0.589789	0.923622	0.77757	0.768714	0.972494	0.282339	0.297235	0.205262	0.453679	0.946969	0.405303	0.302327	0.704751	0.493124
p515	0.701213	0.502608	0.224608	0.771292	0.139742	0.16159	0.432821	0.0907251	0.0217044	0.199564	2.07121e-05	0.00816394	0.00109994	0.59143	0.205522	0.711948	0.838949	0.0611739	0.58761	0.988583	0.651883	0.0305963	0.0947945	0.209314	0.0271088	0.132041	0.738532
p516	0.0790618	0.0977587	0.339324	0.439535	0.866327	0.130285	0.193563	0.388674	0.00260023	0.127292	3.09796e-06	3.44523e-05	0.00601288	0.511113	0.52284	0.0205223	0.00923948	0.0968517	0.187913	0.925554	0.835048	0.0187553	0.180008	0.0292131	0.10294	0.017249	0.0798279
p517	0.0445693	0.340672	0.326226	0.0878761	0.78443	0.805173	0.981946	0.055432	0.0133056	0.0168422	0.702482	0.0248603	0.0487494	0.344636	0.107448	0.781474	0.0310851	0.610046	0.575745	0.701761	0.0306197	0.32012	0.383961	0.357432	0.534797	0.126177	0.747345
p518	5.48184e-06	0.0290872	0.272632	0.015593	0.0873566	0.000117156	1.11022e-14	3.20893e-05	0.00432002	0.803625	0.056956	0.11835	0.648385	0.735131	0.758288	0.0428478	1.24037e-05	0.0202552	0.000422876	0.273009	0.409574	0.0307703	0.143332	0.116594	0.0804671	8.48446e-09	8.1827e-07
p519	0.0342805	0.135782	0.323903	0.256287	0.68111	0.0122238	0.192108	0.0987347	0.000137135	0.0499864	0.00754937	0.000792968	0.0507088	0.37028	0.60235	0.450561	0.0736541	0.714396	0.00578207	0.801158	0.361756	0.0126366	0.494961	0.442565	0.51692	0.327316	0.016496
p520	0.0126747	0.00312308	0.463861	0.0700021	0.358141	0.0390606	5.82989e-05	5.41481e-07	1.7503e-05	0.0360429	0.0365068	0.00564009	0.251777	0.528435	0.838707	0.335308	4.43662e-06	0.257364	0.000939432	0.584315	0.0485367	0.101296	0.640999	0.430712	0.0562882	2.21745e-05	0.000254609
p521	1.20152e-06	0.588469	0.00930398	0.302967	0.0604198	0.0697019	9.4813e-13	0.00396028	0.0332134	0.0446958	0.0874129	0.31269	0.3241	0.0592831	0.547349	0.00266378	2.17637e-08	0.00515887	0.0547765	0.960957	0.924566	0.0055678	0.0118637	0.404189	0.0235931	7.55357e-08	0.00722576
p522	0.000345553	0.0490323	0.185358	0.555457	0.244497	0.0145047	4.37304e-07	0.000173388	0.000324782	0.488226	0.00626132	8.9889e-05	0.285932	0.304159	0.64243	0.00210153	2.98303e-06	0.735286	0.00646773	0.28831	0.501033	3.06134e-05	0.0239552	0.533067	0.00919501	0.000553498	0.000329413
p523	0.0544966	0.121817	0.0660416	0.614065	0.677517	0.20026	0.774758	0.816814	0.344545	0.197155	0.48015	0.891536	0.17974	0.650955	0.925425	0.0123934	0.127555	0.859648	0.19508	0.133521	0.219	0.117079	1.32986e-06	0.654785	0.679243	0.240867	0.732737
p524	6.58968e-05	0.0124397	0.360235	0.177679	0.143007	0.43856	6.44218e-07	0.000104808	0.104462	0.93111	0.0854984	0.0752206	0.21104	0.374852	0.0153389	0.0286584	1.0937e-05	0.266151	0.0286956	0.0655307	0.803865	0.0171849	0.011844	0.796335	0.00759042	7.46171e-09	7.91226e-05
p525	2.96303e-07	0.00185206	0.265238	0.0655773	0.194823	0.0301364	3.306e-11	3.45198e-06	0.0044318	0.327564	0.195004	0.179769	0.760711	0.166065	0.408033	0.0175064	5.29066e-12	0.253246	0.000919173	0.814638	0.372863	0.0248804	0.0430222	0.207647	0.173301	4.0605e-09	7.29204e-07
p526	0.0941817	0.0156782	0.967032	0.433436	0.788292	0.0893688	0.658904	0.366949	0.077962	0.341477	0.332932	0.17841	0.904883	0.860464	0.699902	0.837979	0.112841	0.447258	0.250076	0.230125	0.606531	0.288814	0.526213	0.44948	0.344398	0.563454	0.110823
p527	7.36472e-05	0.445587	0.0363913	0.512961	0.166426	0.00474365	2.87797e-08	0.0127433	0.000359032	0.569179	0.105456	0.320117	0.578833	0.311755	0.754785	0.186288	0.00012686	0.188407	0.00449597	0.804393	0.0500662	0.0090135	0.0104795	0.9962	0.322321	8.69891e-09	0.0104897
p528	8.21565e-15	0.00156075	0.149822	0.23754	0.270331	0.00103302	3.87451e-09	6.21135e-05	0.000358619	0.907126	0.158733	0.01267	0.882612	0.126328	0.0997927	0.0950033	0	0.959774	0.000697493	0.304299	0.515556	0.351761	0.000130117	0.210565	0.329012	2.6926e-11	8.33472e-05
p529	0.108833	0.685277	0.725078	0.0502444	0.88468	0.831046	0.00218373	0.0866143	0.190854	0.947476	0.737207	0.96144	0.457853	0.379529	0.842163	0.208997	0.0737895	0.473302	0.000987803	0.700341	0.607682	0.874287	0.492009	0.868843	0.274541	0.000589185	0.0117621
p530	1.03628e-07	0.00768921	0.467255	0.668186	0.0381928	0.0136368	3.14552e-08	1.59247e-05	0.00475657	0.714688	0.0352592	0.0278015	0.887278	0.126328	0.242146	0.0677423	7.08322e-14	0.131147	0.000504919	0.428248	0.864031	0.130684	0.000570441	0.432214	0.351654	3.46122e-10	0.000135464
p531	0.969351	0.220933	0.860407	0.523775	0.99135	0.131862	0.387895	0.538042	0.385594	0.469689	0.148108	0.00157217	0.784425	0.0575511	0.787927	0.133921	0.826145	0.0271252	0.200521	0.49776	0.802527	0.904612	0.457427	0.662513	0.352117	0.546233	0.902605
p532	3.75733e-06	0.154046	0.115121	0.306816	0.542584	0.136849	0.000606143	0.0012019	0.00234533	0.471364	0.353106	0.350156	0.554252	0.92696	0.919672	0.00373144	2.91273e-09	0.791696	0.0360609	0.0799184	0.411357	0.55108	0.00647629	0.131427	0.150547	0.00081802	0.0284906
p533	0.00081352	0.00553812	0.226582	0.0215975	0.273539	0.0147878	8.01178e-10	0.0091781	0.000164633	0.0314589	0.035685	0.00802078	0.521077	0.0857525	0.515414	0.261081	0.000256795	0.128816	1.34716e-05	0.530922	0.688699	0.597566	0.0817844	0.540791	0.483415	5.70457e-06	0.000188726
p534	9.41568e-09	0.00963308	0.0142025	0.2051	0.0992592	0.0156225	0	1.03789e-05	0.00692023	0.715036	0.231888	0.296484	0.33089	0.0225785	0.0246043	0.0557552	5.68434e-13	0.00612132	0.000530349	0.397757	0.263106	0.0418783	2.38362e-05	0.109605	0.0748351	2.22045e-15	2.95374e-05
p535	0.314166	0.186302	0.718997	0.177329	0.84967	0.0943406	0.0696315	0.420348	0.104769	0.919539	0.986553	0.18288	0.486448	0.665401	0.54167	0.593893	0.282172	0.243409	0.0988886	0.352035	0.904872	0.459409	0.35562	0.367266	0.71942	0.147234	0.0236275
p536	1.92349e-07	0.276231	0.0550285	0.0766886	0.000693444	0.000656604	0	0.000411734	0.0108445	0.145067	0.238409	0.0441418	0.274341	0.0662152	0.395957	0.0191928	1.51494e-06	0.372958	0.00288458	0.172181	0.603942	0.0309736	0.0108395	0.498208	0.00820888	1.85193e-09	1.82928e-05
p537	1.86517e-14	0.00978569	0.173897	0.122881	0.124141	0.00607753	4.37765e-09	1.21219e-05	0.000171662	0.458422	0.0475551	0.0227813	0.723021	0.126328	0.172043	0.0841231	0	0.484846	0.000620792	0.0643448	0.441355	0.274839	1.72264e-06	0.290258	0.501416	2.07052e-11	0.000177064
p538	0.00897779	0.0721352	0.41804	0.107519	0.646368	0.866278	0.708623	0.221635	0.19308	0.355877	0.504924	0.0696675	0.740273	0.599639	0.662597	0.622464	0.0342398	0.787775	0.931982	0.678571	0.261207	0.1972	0.088454	0.19175	0.272002	0.122496	0.277583
p539	0.269333	0.0913836	0.264243	0.109347	0.092634	0.0850566	4.07935e-06	0.0164336	0.00878422	0.374077	0.170807	0.0364584	0.0809728	0.0944254	0.377333	0.0250605	0.0193844	0.0808538	0.00362095	0.927944	0.712693	0.105243	0.697259	0.904176	0.066489	1.79098e-07	0.00126039
p540	1.49789e-09	0.0720799	0.00190261	0.381779	0.0315434	0.00584672	3.84137e-14	0.000243455	0.0041012	0.347317	0.0580488	0.0387649	0.412735	0.0357204	0.0733774	0.0575358	1.52767e-12	0.161471	5.2871e-06	0.806934	0.202871	0.121174	0.0746868	0.191024	0.194266	0	3.30118e-07
p541	0.67565	0.980747	0.224632	0.67952	0.447654	0.449193	0.0458488	0.0961912	0.183111	0.141178	0.467284	0.643702	0.901934	0.953542	0.367517	0.624769	0.942263	0.272454	0.135105	0.715476	0.741818	0.586382	0.298143	0.734097	0.0699841	0.905089	0.125308
p542	0.506498	0.937658	0.960857	0.310632	0.83876	0.207978	0.468063	0.997276	0.194342	0.104117	0.824958	0.287379	0.685426	0.530103	0.0168304	0.424595	0.594392	0.918692	0.648441	0.804808	0.938434	0.555632	0.264174	0.226324	0.146843	0.657527	0.270065
p543	1.80746e-05	0.00838756	0.739585	0.31592	0.0310747	0.0662243	2.25777e-10	1.79673e-05	8.79015e-05	0.106019	0.268957	0.0278056	0.347947	0.844498	0.567289	0.669176	1.37853e-05	0.168607	8.06437e-07	0.399758	0.498988	0.495969	0.261536	0.362933	0.11931	2.20994e-06	0.000811456
p544	0.000143108	0.0818488	0.114776	0.695263	0.10823	0.0135559	2.809e-09	6.88729e-05	0.000712678	0.545451	0.160713	0.0630164	0.478058	0.0751706	0.741584	0.0255935	8.99462e-09	0.174094	2.42282e-05	0.216072	0.44153	0.153131	0.121188	0.0383553	0.0340326	1.5099e-14	1.82493e-05
p545	0.020311	0.0164105	0.341445	0.0202739	0.88511	0.13352	9.34097e-06	0.023961	8.681e-06	0.00124241	0.043571	0.000664618	0.185149	0.832915	0.5157	0.0319499	0.0147782	0.0251299	5.4439e-05	0.0393171	0.272234	0.0665887	0.0560321	0.455118	0.217141	0.00042068	0.00174529
p546	0.00969689	0.876754	0.0681289	0.0943357	0.673632	0.79677	0.844768	0.912306	0.221644	0.00624735	0.914755	0.923069	0.708311	0.0918644	0.893548	0.542691	0.00296622	0.704657	0.596575	0.805027	0.332855	0.345872	0.144354	0.765769	0.541818	0.0558619	0.653841
p547	1.7267e-09	0.011675	0.000663326	0.338019	0.0103247	0.00630061	1.07025e-13	0.00571823	0.0386323	0.0678833	0.0673091	0.0647913	0.169198	0.0811886	0.0823687	0.0305521	2.22045e-15	0.047977	0.000504014	0.835203	0.272306	0.190354	0.000344875	0.124081	0.0643493	2.13163e-14	5.13911e-06
p548	0.0738822	0.0156591	0.565262	0.344566	0.638969	0.981226	0.839904	0.394504	0.2714	0.668943	0.385548	0.545283	0.19064	0.0751221	0.606777	0.420449	0.094744	0.844184	0.811012	0.40885	0.776211	0.491256	0.605209	0.698274	0.434809	0.291065	0.00621533
p549	1.76792e-12	0.0897947	0.0134497	0.307548	0.0129038	0.00274083	2.66454e-15	5.86809e-06	0.00849077	0.691374	0.0642439	0.0785948	0.366351	0.0546494	0.00954815	0.199516	0	0.0952549	2.19497e-05	0.921074	0.0436243	0.162275	0.000515115	0.903789	0.0209257	0	9.26607e-06
p550	0.398929	0.143293	0.913962	0.806641	0.256224	0.929757	0.519077	0.569789	0.436908	0.769769	0.539771	0.782235	0.297453	0.117908	0.322024	0.475486	0.707838	0.12411	0.677437	0.420627	0.425761	0.722215	0.93212	0.0242319	0.623042	0.247073	0.69516
p551	0.0045718	0.00310689	0.288279	0.09919	0.0144001	0.111352	1.07026e-06	0.000103549	0.00743557	0.358753	0.0630678	0.0202643	0.570215	0.183789	0.275497	0.422728	0.000166289	0.595276	3.08276e-05	0.714262	0.0877729	0.0744553	0.0875024	0.0992137	0.106773	1.18056e-08	0.000348847
p552	8.49593e-08	0.00882439	0.0119945	0.0621262	0.195549	0.0162174	2.22045e-15	1.66006e-05	0.00638607	0.759218	0.442556	0.044974	0.427422	0.3821	0.00558534	0.00329347	1.12012e-08	0.393439	0.00248785	0.950431	0.948538	0.0325544	0.00187188	0.0275093	0.0366734	8.63976e-12	5.35977e-07
p553	0.933327	0.386815	0.206241	0.263604	0.399537	0.399835	0.0393533	0.237446	0.683768	0.251821	0.631698	0.959258	0.230813	0.856826	0.106074	0.234145	0.399104	0.828332	0.147043	0.102906	0.922682	0.4718	0.986165	0.921225	0.0129359	0.659753	0.88421
p554	0.393666	0.854044	0.424282	0.574788	0.264391	0.472794	0.257785	0.404991	0.251212	0.382939	0.559877	0.836921	0.27386	0.151883	0.000145078	0.285491	0.981423	0.903438	0.533418	0.966821	0.796718	0.174817	0.191219	0.41337	0.544994	0.296558	0.24415
p555	0.00884077	0.614196	0.0376764	0.617749	0.34764	0.40929	0.420815	0.905679	0.278336	0.227964	0.145924	0.442103	0.938893	0.294187	0.291801	0.248936	0.0193497	0.0852747	0.979238	0.4162	0.619249	0.196702	0.982411	0.0632918	0.75803	0.429989	0.905756
p556	0.284215	0.113229	0.871295	0.43674	0.956702	0.42635	0.11296	0.499819	0.101888	0.534126	0.115214	0.252004	0.384579	0.570431	0.584832	0.87291	0.154871	0.231978	0.0526478	0.380604	0.370774	0.0980112	0.85022	0.221997	0.863231	0.0138245	0.411817
p557	8.7945e-06	0.10568	0.000841088	0.121693	0.0124487	0.0199558	1.05433e-11	0.000135878	0.0935354	0.314056	0.0556993	0.133488	0.634957	0.0842617	0.10701	0.0141854	5.31476e-08	0.020932	0.00395553	0.906561	0.277847	0.0167302	0.000634359	0.210229	0.065203	5.32907e-15	1.31545e-05
p558	0.967926	0.214232	0.235233	0.109281	0.470532	0.176809	0.000881474	0.0623039	0.194079	0.772614	0.714614	0.335355	0.177794	0.679136	0.163207	0.102679	0.214441	0.0303509	0.00588287	0.430807	0.184817	0.0358177	0.291814	0.0800078	0.0815186	4.71102e-06	7.59695e-05
p559	0.000270943	0.243159	0.753559	0.993461	0.164428	0.0945513	0.000396249	0.0396084	0.000887956	0.69723	0.0252243	0.150257	0.897766	0.442566	0.309966	0.00151268	8.48505e-05	0.816436	0.0599133	0.974805	0.255432	0.238377	0.462227	0.974942	0.670985	4.97394e-05	0.000124017
p560	0.0633249	0.852732	0.862061	0.410268	0.0359903	0.0746799	2.91192e-05	0.00773584	0.0133752	0.842659	0.621738	0.0291361	0.586895	0.434779	0.662523	0.669004	0.000402944	0.332099	0.000557427	0.610804	0.103598	0.0336502	0.958846	0.82206	0.0145315	1.21357e-06	0.00957618
p561	0.000138353	0.086908	0.133441	0.990416	0.0485208	0.00316359	5.82778e-07	0.0272183	0.000131584	0.316154	0.0131338	0.0357657	0.74044	0.104698	0.152005	0.392083	2.68456e-07	0.383806	0.000207763	0.633731	0.219448	0.0593513	0.0634635	0.123227	0.547873	1.29542e-09	0.0239264
p562	0.000131976	0.0581346	0.0307462	0.573821	0.0322908	0.0240934	5.05621e-10	0.000926362	0.38065	0.178977	0.588619	0.355919	0.22559	0.100307	0.317881	0.0442482	1.02021e-05	0.199094	0.00634078	0.847359	0.774233	0.00860064	0.0313336	0.645086	0.0323132	8.20179e-08	3.17825e-05
p563	0.3248	0.403692	0.482766	0.78009	0.691746	0.715689	0.174628	0.101597	0.445779	0.433951	0.946819	0.591929	0.354819	0.0586789	0.311505	0.493572	0.180192	0.186161	0.0339411	0.596085	0.272087	0.78636	0.431234	0.305364	0.0107941	0.0487925	0.352641
p564	4.39798e-06	0.000482932	0.0712467	0.0917839	0.350652	0.475535	1.94732e-10	0.000613828	0.000120742	0.142655	0.352381	0.0383991	0.885652	0.278639	0.270486	0.104194	6.83017e-07	0.0915196	4.07823e-05	0.792723	0.734705	0.429643	0.0718032	0.521481	0.1311	7.59661e-10	3.40295e-05
p565	0.0951542	0.282765	0.00845464	0.783333	0.678246	0.878307	0.207297	0.887298	0.296406	0.606525	0.70338	0.204233	0.773019	0.0458721	0.204629	0.25071	0.000203036	0.383808	0.109879	0.018481	0.0113488	0.924557	0.140503	0.920473	0.401889	0.0872451	0.410073
p566	0.621768	0.364591	0.474472	0.362243	0.0968027	0.0346574	0.768625	0.502497	0.539146	0.900409	0.965634	0.89757	0.559202	0.913451	0.475501	0.659198	0.967791	0.770185	0.21527	0.0892533	0.10203	0.363097	0.901232	0.221546	0.994886	0.146054	0.400995
p567	0.552846	0.543628	0.5817	0.513807	0.478943	0.40793	0.346343	0.344145	0.722666	0.412386	0.586334	0.124137	0.38423	0.526992	0.996308	0.829832	0.522535	0.265156	0.549314	0.77603	0.569259	0.324255	0.102115	0.203141	0.584416	0.481274	0.725973
p568	0.994016	0.399292	0.0569273	0.975968	0.0618248	0.491414	0.0357145	0.431907	0.231834	0.176488	0.11502	0.145592	0.718615	0.970292	0.248476	1.10449e-05	0.245476	0.406835	0.998605	0.178367	0.612883	0.332243	0.700656	0.983033	0.535183	0.0335141	0.00305805
p569	0.184637	0.382547	0.104932	0.7511	0.815002	0.277369	0.00226161	0.0685423	0.0327792	0.0209367	0.133767	0.00734155	0.386551	0.501538	0.623357	0.711443	0.224202	0.224263	2.57046e-06	0.634283	0.1308	0.0013709	0.666836	0.519651	0.173904	0.349819	0.00110239
p570	0.201118	0.0246439	0.0238101	0.103254	0.0278557	0.316635	0.526991	0.929816	0.227729	0.16726	0.546829	0.849912	0.367354	0.203763	0.341351	0.639845	0.00776954	0.866956	0.500328	0.842984	0.0144252	0.944182	0.430201	0.85306	0.175352	0.548427	0.284182
p571	0.77837	0.826703	0.0720046	0.686226	0.902012	0.942047	0.228769	0.670419	0.856012	0.15649	0.639182	0.535121	0.718466	0.937842	0.780935	0.241664	0.677477	0.857757	0.0298514	0.960991	0.0155131	0.734653	0.882854	0.0850863	0.478564	0.821461	0.952478
p572	0.0362729	0.952193	0.0930929	0.643624	0.0880583	0.111815	0.00156796	0.0077128	0.824703	0.275837	0.21315	0.0460438	0.870968	0.41221	0.884651	0.635368	0.00813902	0.823673	0.250562	0.0073206	0.599389	0.355802	0.0285426	0.684719	0.237291	0.00103963	0.142623
p573	0.026033	0.625766	0.00365857	0.243062	0.781389	0.189954	0.501765	0.571156	0.762764	0.0783277	0.203004	0.871245	0.777714	0.149306	0.428581	0.0854924	0.000286387	0.700152	0.915153	0.536195	0.402118	0.990161	0.149629	0.260941	0.828148	0.0150663	0.672164
p574	0.020274	0.584954	0.873885	0.28188	0.397836	0.731619	0.0162499	0.0867545	1.75602e-05	0.389211	2.71457e-05	9.00246e-06	0.0697631	0.912832	0.732767	0.00715802	0.00235915	0.372378	0.0167172	0.552021	0.946122	0.275452	0.613678	0.446202	0.0599045	0.0150863	0.00301198
p575	1.47824e-07	0.0368233	0.0740326	0.968942	0.153281	0.0151121	1.37633e-09	0.0477078	0.00252013	0.969257	0.275813	0.192037	0.158228	0.0503188	0.0463487	0.367505	1.52258e-11	0.0758769	0.000386796	0.478286	0.138054	0.113101	0.00898793	0.452824	0.827105	2.15383e-13	2.10701e-05
p576	4.57602e-10	0.00587835	0.165743	0.256453	0.0308609	0.00278383	2.23716e-10	0.000359946	0.00159584	0.340602	0.0900464	0.00073393	0.997098	0.651124	0.186197	0.0536466	1.10435e-10	0.931044	0.000222429	0.893102	0.444596	0.0420298	0.060434	0.213062	0.409978	2.68855e-09	1.2584e-08
p577	0.229983	0.530592	0.498293	0.9652	0.805682	0.481688	0.497682	0.781449	0.612387	0.284594	0.492919	0.462465	0.559666	0.315301	0.411516	0.711403	0.0575214	0.193583	0.166979	0.239947	0.134964	0.0478573	0.860216	0.842636	0.785295	0.500011	0.154027
p578	0.134903	0.998183	0.855829	0.630323	0.29273	0.465841	0.996904	0.708226	0.768699	0.451247	0.453804	0.570222	0.739436	0.322699	0.902389	0.590624	0.0815716	0.0333812	0.377842	0.493848	0.766602	0.449731	0.11392	0.644773	0.373899	0.911273	0.656773
p579	1.30139e-07	0.0244732	0.0757467	0.421002	0.0979507	0.00197771	6.668e-13	7.62401e-05	0.0117574	0.404625	0.0232596	0.00418725	0.6375	0.724228	0.103269	0.330386	3.92067e-09	0.485511	7.12862e-06	0.706187	0.507686	0.409126	0.362312	0.111898	0.0610029	2.35367e-14	1.06765e-06
p580	5.89156e-05	0.459471	0.782997	0.756863	0.0866	0.0942546	0.00992187	0.0159496	0.0175555	0.412691	0.0934734	0.0301729	0.780359	0.669177	0.094732	0.186113	0.00206216	0.254621	0.157828	0.361164	0.832189	0.621397	0.431234	0.838402	0.472705	0.0195459	0.021439
p581	0.00136052	0.167768	0.956563	0.203047	0.158695	0.201198	4.11996e-05	0.00344181	0.00197352	0.177543	4.83338e-07	1.03014e-05	0.0845149	0.994617	0.364077	0.0476176	0.00144493	0.893441	0.00940313	0.269424	0.879043	0.204283	0.260345	0.516767	0.12528	0.00217374	0.0018039
p582	0.786293	0.279804	0.55546	0.299269	0.160754	0.793536	0.589788	0.00989595	0.158407	0.840341	0.323569	0.434952	0.373452	0.940003	0.083238	0.943149	0.779935	0.883024	0.40449	0.364624	0.600551	0.346989	0.809234	0.184025	0.124924	0.795444	0.0428185
p583	0.00339232	0.0845435	0.396967	0.417078	0.0109844	0.0655478	8.09551e-10	5.31939e-07	0.000104312	0.490063	0.00202177	0.00540303	0.483744	0.145194	0.228791	0.0491147	7.92966e-05	0.156983	0.000213247	0.219607	0.869328	0.0309543	0.200728	0.909215	0.000628679	6.52486e-09	0.000336985
p584	0.00398358	0.00275798	0.600794	0.276371	0.553423	0.00105819	0.00018107	0.00261135	5.79252e-06	0.378351	0.285098	0.0568228	0.510576	0.625968	0.933083	0.271305	0.000447482	0.15354	0.000257043	0.270494	0.639414	0.0309941	0.96376	0.53972	0.578465	1.35353e-05	0.00134004
p585	9.54792e-15	0.0338857	0.00683637	0.0908762	0.187547	0.0328244	1.30849e-07	0.000103515	0.00258154	0.624077	0.00830621	0.0452113	0.505651	0.117613	0.697058	0.089351	0	0.439038	0.00303984	0.102432	0.59246	0.645729	1.72463e-05	0.166029	0.805654	3.58724e-10	0.000192616
p586	0.045138	0.0481455	0.077704	0.140768	0.30132	0.00927069	2.61727e-07	0.000596277	0.0214954	0.560676	0.275316	0.175388	0.254241	0.13719	0.452067	0.0706844	0.00292298	0.111995	0.000115717	0.113142	0.280343	0.00468787	0.346384	0.534254	0.0784496	1.43079e-08	2.15053e-07
p587	0.00169601	0.0140593	0.770863	0.555787	0.0833248	0.0550958	0.0185024	0.00500226	0.0014507	0.853207	0.270311	0.109873	0.265015	0.204241	0.808751	0.0531598	1.33057e-05	0.480768	0.0014409	0.62783	0.881847	0.584084	0.77199	0.209153	0.541362	1.85665e-06	0.000492886
p588	0.418221	0.488183	0.186698	0.652289	0.752714	0.871477	0.809924	0.265055	0.470665	0.0587523	0.37863	0.433429	0.684427	0.806664	0.804853	0.841682	0.405916	0.322348	0.260747	0.736908	0.588269	0.462217	0.321782	0.562618	0.471289	0.563798	0.676891
p589	7.87693e-07	0.00699335	0.238564	0.0912765	0.101031	0.200579	2.50709e-08	0.000449475	0.000405503	0.992903	0.00976785	0.00117852	0.606355	0.0944254	0.0206588	0.0229888	8.41465e-09	0.988835	0.0227125	0.574505	0.276083	0.140041	8.67778e-05	0.39565	0.354347	2.76184e-11	0.000193505
p590	0.00210085	0.0213253	0.664914	0.109724	0.791893	0.00710095	0.008932	0.129048	0.191275	0.996445	0.15548	0.293613	0.609049	0.299211	0.688794	0.925279	1.87129e-07	0.62265	0.0777211	0.202264	0.567082	0.757862	0.093536	0.0543144	0.856791	0.00150145	0.0114731
p591	0.0603695	0.77139	0.775184	0.541718	0.204712	0.0853449	0.0551688	0.079295	0.0137918	0.484972	4.70847e-09	1.01849e-07	0.0188614	0.96366	0.566062	0.131701	0.0198275	0.472042	0.434836	0.93821	0.629495	0.0671926	0.714353	0.723812	0.0326293	0.0837481	0.00455028
p592	0.00168019	0.78941	0.215967	0.243142	0.402339	0.245547	0.00120125	0.0214378	0.395921	0.836456	0.121353	0.140092	0.604728	0.302607	0.444318	0.518092	1.33276e-05	0.997804	0.0101845	0.114768	0.271786	0.656023	0.804357	0.949267	0.442485	2.14621e-05	0.00152681
p593	0.247393	0.129656	0.130297	0.238983	0.770534	0.714871	0.80843	0.309818	0.980498	0.988692	0.509769	0.848993	0.626475	0.00950061	0.00124988	0.594267	0.00381144	0.830815	0.99604	0.706555	0.00097739	0.508284	0.159239	0.926949	0.0778654	0.267914	0.850106
p594	9.12919e-05	1.4896e-05	0.0267982	0.45132	0.953239	0.124226	1.45541e-06	0.00724261	0.0036209	0.742029	0.960556	0.482279	0.583267	0.0231941	0.0252033	0.367113	4.04793e-07	0.395691	0.000140867	0.0436314	0.345637	0.398498	0.0282133	0.0109437	0.751201	9.36736e-10	0.00265501
p595	0.501216	0.721595	0.140761	0.378753	0.778117	0.252888	0.0624067	0.0250568	0.0756959	0.100378	0.0892212	0.125621	0.389072	0.837261	0.2547	0.0935259	0.211391	0.094747	0.0191903	0.285283	0.421662	0.964903	0.714225	0.184	0.613818	0.1188	0.530572
p596	9.99201e-15	0.00910098	0.00214425	0.630952	0.180011	0.004954	5.29576e-13	0.000179209	0.0104686	0.85663	0.00776005	0.0826213	0.940973	0.0751706	0.00335376	0.0927793	0	0.235382	0.0021808	0.771813	0.104187	0.205257	0.000899049	0.58627	0.157302	2.45803e-13	1.51707e-05
p597	7.0244e-07	0.113325	0.00547393	0.492564	0.00923042	0.000625563	0	4.43302e-06	0.00804874	0.468713	0.00748198	0.0369933	0.781344	0.368064	0.266435	0.184729	1.52271e-08	0.177607	0.000432542	0.534159	0.816108	0.0855197	0.00176891	0.884428	0.011259	1.56963e-12	4.76038e-06
p598	0.388513	0.447216	0.835932	0.138173	0.513228	0.265114	0.161901	0.375945	0.237824	0.429363	0.972764	0.815843	0.463854	0.20109	0.228593	0.958187	0.0859216	0.703893	0.14251	0.267651	0.710147	0.0613672	0.209772	0.762943	0.836802	0.619697	0.384555
p599	0.0255419	0.27892	0.913515	0.93132	0.954346	0.397009	0.00043058	0.26489	0.00709625	0.312346	0.264019	0.377005	0.907582	0.637822	0.161939	0.540755	0.0122474	0.40583	0.0115016	0.423103	0.7997	0.105588	0.369918	0.824261	0.113449	0.0156401	0.00359028
p600	0.0101046	0.145317	0.135212	0.927662	0.805503	0.252586	0.585361	0.354146	0.370593	0.878841	0.299023	0.327188	0.2562	0.554297	0.647571	0.730866	0.0119961	0.98319	0.250156	0.665252	0.729688	0.333143	0.668528	0.341794	0.656548	0.105055	0.0738091
p601	0.0839436	0.297255	0.463004	0.184298	0.299442	0.271916	0.000277794	0.00480915	0.026141	0.04973	0.280491	0.239499	0.443786	0.178603	0.728117	0.0791543	0.00360827	0.467628	0.0251528	0.183894	0.164974	0.477506	0.410706	0.13936	0.229102	1.26625e-06	6.92092e-05
p602	0.846091	0.185088	0.771531	0.687472	0.11813	0.306138	0.624938	0.117674	0.451727	0.0223644	0.733895	0.651304	0.952277	0.164587	0.806997	0.66029	0.316375	0.118697	0.00937769	0.0145174	0.529394	0.974572	0.0947945	0.18584	0.613909	0.215706	0.365342
p603	0.228813	0.183109	0.102408	0.12676	0.484827	0.645576	0.0986242	0.1802	0.983139	0.252343	0.846276	0.136071	0.613783	0.273	0.0689482	0.902511	0.146031	0.243415	0.785162	0.726275	0.727243	0.00214665	0.749207	0.283936	0.552929	0.0755736	0.822769
p604	0.127566	0.0529867	0.529702	0.994103	0.152091	0.18725	0.00089031	0.119135	0.00679304	0.442562	0.225981	0.310084	0.720869	0.233117	0.391229	0.00085856	0.0102728	0.789588	0.00283196	0.257961	0.892568	0.277171	0.272089	0.207064	0.0992193	1.76196e-05	0.00305606
p605	0.72427	0.602792	0.266989	0.790319	0.0522669	0.438311	0.0259279	0.107734	0.890211	0.0512996	0.528614	0.733486	0.360685	0.00849214	0.718482	0.000804823	0.796384	0.586594	0.199129	0.696724	0.480071	0.203802	0.712447	0.0302289	0.0306575	0.000693432	0.0204404
p606	1.36147e-06	0.0221867	0.0244655	0.334577	0.00690399	0.000287114	2.22045e-16	7.95401e-07	0.00642262	0.241675	0.115662	0.070103	0.459736	0.0511338	0.32402	0.0118214	1.29775e-10	0.0371593	2.44044e-05	0.921601	0.994822	0.145127	0.0236095	0.783923	0.0011397	4.44089e-16	5.08723e-06
p607	0.0299726	0.291298	0.106766	0.428003	0.722159	0.578592	0.0018664	0.00175463	0.0568677	0.595655	0.207104	0.202852	0.547674	0.191043	0.262606	0.472964	0.0105277	0.766122	0.0214772	0.0691764	0.90262	0.577731	0.330821	0.296554	0.451813	5.96127e-06	0.000380223
p608	0.441863	0.0852332	0.601445	0.938726	0.371947	0.246944	0.710687	0.443116	0.0892047	0.0214325	0.334791	0.00822586	0.206577	0.15297	0.148496	0.219665	0.0350883	0.687553	0.0328809	0.0740532	0.22685	0.723601	0.245462	0.481916	0.978557	0.698202	0.0108913
p609	1.18609e-07	0.296529	0.176056	0.750546	0.190296	0.00300551	1.64674e-07	5.67151e-05	0.000462236	0.467889	0.164255	0.127727	0.531503	0.126328	0.713301	0.243737	1.31461e-08	0.295924	0.00864291	0.0455623	0.526445	0.323154	0.050052	0.162215	0.243003	8.50864e-11	0.0014635
p610	0.0384274	0.874078	0.1562	0.348477	0.566082	0.428557	0.00106002	0.047731	0.80851	0.318244	0.328255	0.363826	0.600041	0.22197	0.0211986	0.473868	0.0172039	0.225181	0.866498	0.798337	0.857009	0.0445448	0.711135	0.458556	0.872284	0.0219038	0.908734
p611	3.39114e-10	0.0593017	0.0526398	0.426345	0.0157803	0.0020119	1.64957e-12	3.06489e-06	0.0145934	0.660838	0.0419724	0.0335755	0.624953	0.615129	0.313722	0.176194	1.2214e-11	0.695046	8.59909e-05	0.55469	0.986799	0.0628372	0.029666	0.632419	0.00529763	3.69527e-11	4.54433e-06
p612	4.77814e-06	0.0122813	0.0972416	0.862071	0.0729631	0.0322508	1.95088e-12	8.58135e-09	0.0114673	0.243376	0.0834119	0.0112167	0.509189	0.0272424	0.0406745	0.000351695	1.38422e-09	0.263138	0.0162873	0.843188	0.827685	0.0131589	0.00940403	0.579641	0.0109602	2.07636e-11	0.000812335
p613	1.11502e-05	0.317077	0.00643102	0.112886	0.00941419	0.00591093	1.45468e-09	0.00012294	0.00865113	0.836338	0.0451229	0.0215827	0.792758	0.712992	0.1015	0.0495363	7.57425e-09	0.156251	0.00202507	0.854388	0.230654	0.00284774	0.00358702	0.276972	0.00028052	1.25104e-07	0.000270627
p614	0.0193509	0.193845	0.242922	0.562336	0.600476	0.0024916	3.68666e-06	0.000901193	0.00831768	0.595462	0.0241831	0.0350911	0.786336	0.99343	0.62953	0.652867	0.00677039	0.394507	0.00384528	0.492852	0.596582	0.00153186	0.273698	0.510186	0.000455497	6.65044e-05	5.77872e-06
p615	9.44578e-13	0.00515968	0.0265099	0.256588	0.0566999	0.00251976	2.11136e-11	0.000234412	0.00379883	0.54359	0.0217896	0.00154233	0.903375	0.109408	0.0633274	0.024231	0	0.475442	0.000347321	0.764373	0.123863	0.205465	4.74326e-05	0.503945	0.150699	8.74634e-12	0.000196961
p616	0.00704549	0.067229	0.662574	0.151565	0.770774	0.0460949	0.000311837	0.00145577	0.0420517	0.377235	0.00354913	0.00842395	0.261491	0.853762	0.31191	0.261498	0.00321802	0.906013	0.0055092	0.136438	0.90026	0.32091	0.857867	0.381057	0.588975	0.00011775	0.0174841
p617	0.382158	0.512896	0.965519	0.95959	0.567999	0.493805	0.801449	0.935356	0.554601	0.896973	0.963947	0.851765	0.752218	0.639237	0.488689	0.821277	0.795957	0.205069	0.254038	0.0906799	0.779446	0.714248	0.488088	0.442375	0.787994	0.576783	0.445731
p618	0.664078	0.763301	0.0947865	0.747695	0.713465	0.553111	0.521934	0.0664801	0.260018	0.517858	0.436406	0.474862	0.984779	0.347566	0.91232	0.334514	0.72061	0.173058	0.294296	0.941442	0.452366	0.986546	0.127803	0.325384	0.653149	0.652132	0.748645
p619	0.00994063	0.0835936	0.522416	0.0792367	0.389103	0.356925	0.00307701	0.0934274	0.022014	0.334178	0.000214617	0.00013643	0.0667714	0.868346	0.40305	0.00184697	0.0117568	0.125951	0.141801	0.940831	0.423749	0.105382	0.349075	0.531007	0.0918502	0.0247551	0.0107432
p620	7.24844e-10	0.0108803	0.0841698	0.517031	0.0326967	0.0252978	3.45501e-13	1.01556e-05	0.000655533	0.716264	0.00227456	0.00475086	0.885572	0.0642363	0.02905	0.0102287	2.34701e-13	0.308988	0.000151642	0.696239	0.581479	0.1372	0.000372749	0.789464	0.201858	1.10512e-12	1.52763e-05
p621	7.29755e-06	0.0664548	0.172316	0.274328	0.233253	0.00110669	1.01212e-11	0.00653931	0.00232709	0.345002	0.129466	0.0795683	0.570586	0.718528	0.384713	0.158454	6.58024e-05	0.353988	0.00021709	0.905049	0.999322	0.0739909	0.254144	0.978985	0.104511	1.22173e-08	0.000341794
p622	2.48246e-12	0.00594393	0.00776264	0.229969	0.238346	0.0145219	9.20084e-11	0.000942343	0.0466901	0.177352	0.741278	0.361192	0.146474	0.0389904	0.0439582	0.170623	0	0.230803	0.00697868	0.515539	0.252829	0.0534641	0.000200429	0.0735653	0.96229	3.52496e-12	0.000187957
p623	0.224158	0.130014	0.594258	0.545603	0.158557	0.716294	0.209453	0.1251	0.0301723	0.713247	4.26357e-07	4.53545e-05	0.0210012	0.378499	0.514642	0.0108422	0.20005	0.191196	0.771647	0.206445	0.214764	0.452055	0.561184	0.675379	0.0184169	0.521494	0.11294
p624	0.0203522	0.0073163	0.0428402	0.166774	0.116611	0.638644	8.93999e-08	0.000375642	0.0163301	0.141747	0.073127	0.00330607	0.55171	0.0348231	0.0910888	0.00327714	5.15273e-05	0.345563	0.000963438	0.23475	0.359274	0.0685493	0.0204027	0.882054	0.346704	8.57162e-09	0.00891046
p625	3.95199e-05	0.308802	0.299715	0.778421	0.0687946	0.00105991	9.719e-11	0.000281937	6.30694e-05	0.346925	0.00202589	0.00720117	0.719721	0.851122	0.264166	0.142717	2.06236e-05	0.427778	0.00491056	0.0461657	0.816047	0.0560498	0.360528	0.34733	0.0023543	9.13295e-06	0.000429141
p626	0.000444517	0.536794	0.238339	0.791424	0.535443	0.00159417	0.000158917	0.00578991	0.0159826	0.739936	0.172518	0.120322	0.404757	0.302607	0.772547	0.770047	8.70918e-08	0.482875	0.0101845	0.0773329	0.616359	0.509905	0.0610799	0.0256271	0.896208	5.42691e-05	0.0200398
p627	0.421672	0.667882	0.126572	0.895562	0.480914	0.476245	0.711609	0.824727	0.00741678	0.144942	0.85338	0.340301	0.369939	0.38465	0.55027	0.0682408	0.72274	0.846714	0.906754	0.0138452	0.243381	0.117261	0.117318	0.261184	0.8554	0.536546	0.657992
p628	0.000150741	0.0190718	0.0670922	0.0586452	0.0251226	0.115921	2.90825e-11	2.14727e-05	0.043457	0.366337	0.0165925	0.0538742	0.808513	0.729472	0.229713	5.92998e-05	2.40896e-06	0.0905713	0.000282045	0.774778	0.964388	0.65415	0.00777324	0.110321	0.0133899	7.53838e-07	0.00019234
p629	0.00851225	0.493477	0.278544	0.776251	0.0176685	0.250894	6.54967e-07	0.0613177	0.606962	0.0821809	0.874474	0.836607	0.0818771	0.191043	0.5684	0.539896	0.000313665	0.19845	0.117386	0.222382	0.225829	0.374349	0.871222	0.553836	0.03045	4.75827e-05	0.00273134
p630	0.0197023	0.903867	0.828468	0.755291	0.941791	0.588831	0.822984	0.104856	0.873041	0.98991	0.641351	0.642436	0.967666	0.264677	0.260019	0.579228	0.00707349	0.492057	0.012536	0.91973	0.0635645	0.272387	0.21544	0.645593	0.402436	0.497125	0.235429
p631	0.334202	0.886678	0.0570251	0.708243	0.9718	0.856327	0.892577	0.880627	0.176632	0.135264	0.235914	0.225426	0.0567112	0.472612	0.678783	0.110691	0.48647	0.312727	0.765451	0.221824	0.0695184	0.00177269	0.107918	0.221791	0.566251	0.516107	0.724247
p632	0.000960656	0.478446	0.818646	0.369641	0.535235	0.369048	0.000545543	0.0447056	3.0468e-05	0.989976	0.00270921	0.000207739	0.219369	0.492885	0.595817	0.000156319	1.40613e-06	0.572028	0.0942464	0.758098	0.864616	0.0848831	0.622035	0.117849	0.142522	0.0159253	0.000182537
p633	0.528369	0.581431	0.199571	0.00671578	0.135464	0.305491	0.00534299	0.0327841	0.94275	0.143604	0.904963	0.551603	0.566825	0.985888	0.828059	0.391161	0.449797	0.368071	0.00498497	0.368966	0.300863	0.192547	0.633351	0.72823	0.0412871	0.332381	0.236233
p634	0.625553	0.944773	0.593847	0.215699	0.391745	0.578667	0.332293	0.5361	0.820384	0.88629	0.373623	0.231076	0.837781	0.0763554	0.207268	0.614387	0.581414	0.461087	0.150714	0.847664	0.105082	0.739785	0.770458	0.132096	0.64608	0.137009	0.907578
p635	0.00342815	0.0197087	0.00700753	0.474123	0.0746479	0.0515729	9.93986e-05	0.00782128	0.0863223	0.920237	0.0973539	0.00293115	0.942811	0.322919	0.270796	0.0209902	1.90807e-05	0.654858	0.225669	0.614974	0.833398	0.0318197	7.20546e-05	0.183944	0.38565	0.00011974	0.00422046
p636	0.00164025	0.453916	0.227581	0.370835	0.0631216	0.00101488	5.51139e-08	0.00249549	5.58283e-06	0.675657	0.0101396	0.0500339	0.397686	0.641662	0.239796	0.130718	2.38043e-05	0.173464	5.35734e-07	0.985676	0.962553	0.0543623	0.411145	0.304628	0.326066	1.52128e-08	0.00990491
p637	0.416985	0.271108	0.690338	0.789467	0.122108	0.513109	0.75171	0.654925	0.619571	0.50219	0.129605	0.200018	0.569816	0.877341	0.479117	0.382026	0.911688	0.325387	0.604781	0.676406	0.960233	0.55991	0.458823	0.883015	0.365446	0.416016	0.091655
p638	0.517154	0.550127	0.00478696	0.548794	0.31164	0.986989	0.0130571	0.30956	0.547165	0.150736	0.750977	0.829044	0.0727016	0.248912	0.573941	0.00808218	0.0786966	0.109651	0.0299992	0.978598	0.0566625	0.104298	0.138494	0.203428	0.128908	0.00022556	0.178668
p639	0.196075	0.838109	0.132175	0.242289	0.368391	0.700808	0.0390626	0.344291	0.884852	0.0125994	0.571171	0.284025	0.49075	0.516291	0.957186	0.815346	0.21699	0.0533233	0.481339	0.643969	0.8304	0.359918	0.549801	0.377423	0.0250947	0.00584824	0.293702
p640	0.425015	0.793558	0.585394	0.66544	0.338098	0.90677	0.705106	0.560398	0.524093	0.493162	0.306367	0.144549	0.426819	0.583242	0.623504	0.87043	0.290297	0.649896	0.893159	0.0803551	0.631318	0.679163	0.457427	0.831799	0.380656	0.351788	0.974234
p641	0.0031361	0.0007015	0.406784	0.0610129	0.224213	0.0198586	0.000266369	0.00804293	0.0207015	0.16908	0.000190006	0.000388346	0.56222	0.925123	0.437497	0.291174	0.0036924	0.929612	0.000428648	0.615714	0.46029	0.100196	0.655001	0.474969	0.01549	0.00488191	2.18941e-06
p642	0.00102883	0.198152	0.943222	0.00644479	0.0355661	0.00683933	2.87195e-09	0.00102369	0.000208719	0.010033	0.910298	0.0224326	0.711937	0.0503188	0.15476	0.642838	0.000378911	0.0643472	1.16006e-05	0.630311	0.177284	0.706892	0.0716666	0.21779	0.0214668	4.75723e-06	1.60759e-05
p643	3.28626e-14	0.00869399	0.022457	0.236283	0.0332511	0.000416383	7.65121e-12	1.4029e-05	1.80009e-05	0.836311	0.0275811	0.00432069	0.804982	0.0944254	0.344277	0.0348512	0	0.365375	0.000111675	0.238479	0.674447	0.470964	0.000146411	0.218601	0.653233	1.81846e-11	2.62e-06
p644	0.125415	0.276497	0.693281	0.522123	0.409911	0.191941	0.040389	0.0245356	0.0907442	0.449594	0.00564961	0.015275	0.734055	0.0209426	0.294692	0.279358	0.349692	0.384824	0.539633	0.149059	0.92702	0.257595	0.21544	0.526471	0.00745423	0.868894	0.132296
p645	0.162947	0.538188	0.00217984	0.642635	0.303614	0.432509	0.653372	0.868051	0.104485	0.000366989	0.854769	0.297048	0.0588998	0.164084	0.437118	0.789114	0.298812	0.726935	0.0551448	0.588138	0.872718	0.821394	0.190138	0.603772	0.368746	0.187486	0.954158
p646	0.00568164	0.518026	0.260585	0.365937	9.03391e-05	0.226783	6.59047e-09	1.24762e-05	0.0406008	0.790389	0.37988	0.018672	0.911965	0.551171	0.831252	0.0977397	0.000590414	0.16798	0.0197925	0.88543	0.198825	0.231136	0.0634285	0.0172437	0.00519741	3.90393e-09	0.00105972
p647	0.0291549	0.984277	0.216609	0.621068	0.010102	0.121911	3.23879e-07	0.0267774	0.133869	0.101006	0.552255	0.602499	0.474995	0.368606	0.731071	0.000538664	0.0571687	0.142972	0.147667	0.998953	0.351343	0.0182688	0.755623	0.411891	0.00469829	9.52005e-05	0.00754152
p648	3.6203e-08	0.0133182	0.335526	0.572935	0.0561493	0.000260375	3.72441e-09	2.41774e-06	0.000268076	0.524464	0.0484255	0.0136963	0.83116	0.0546494	0.218214	0.311226	3.66374e-14	0.636141	0.00020763	0.59775	0.818643	0.149768	0.0507049	0.767158	0.721131	7.74747e-09	6.00815e-06
p649	0.854877	0.116737	0.0210597	0.0997022	0.204209	0.599827	0.0948148	0.733473	0.00358626	0.00190336	0.560658	0.352873	0.416851	0.862031	0.429804	0.761533	0.554384	0.0987366	0.00131996	0.500732	0.914512	0.965016	0.106127	0.995001	0.092806	0.97485	0.133662
p650	0.820304	0.119745	0.26008	0.449648	0.327527	0.272899	0.162622	0.954357	0.616316	0.561965	0.589439	0.0964898	0.616951	0.617104	0.104133	0.755964	0.648243	0.605308	0.591225	0.86433	0.787505	0.494019	0.48541	0.97102	0.506744	0.637948	0.803427
p651	0.982625	0.270314	0.310149	0.639248	0.818077	0.934633	0.881793	0.66292	0.403458	0.733958	0.461861	0.512664	0.292043	0.186885	0.812462	0.261063	0.455265	0.774844	0.452273	0.290348	0.407598	0.9391	0.538036	0.50477	0.846505	0.252811	0.332201
p652	0.78578	0.167171	0.541511	0.0668189	0.932824	0.150882	0.959924	0.681435	0.0290317	0.334337	0.609402	0.194755	0.788394	0.347811	0.648046	0.781492	0.520963	0.482118	0.736091	0.368925	0.819756	0.0783835	0.40317	0.491737	0.405776	0.655843	0.436885
p653	1.85996e-09	0.0871368	0.0145521	0.32658	0.156329	0.0897053	5.25598e-08	0.000327183	0.00673128	0.803462	0.0387624	0.0494525	0.230201	0.191043	0.0698106	0.220355	3.30869e-12	0.321633	0.00492668	0.226585	0.247931	0.221837	1.32841e-09	0.201647	0.580316	5.08751e-08	0.00590255
p654	0.434755	0.55119	0.73209	0.935747	0.0322031	0.631306	0.00163929	0.00529539	0.310516	0.265207	0.406085	0.66111	0.510773	0.671072	0.547406	0.000597718	0.759493	0.850345	0.178492	0.81134	0.172216	0.0551118	0.256797	0.0942832	0.0217266	0.0028732	0.00193192
p655	0.000474629	0.150785	0.00619554	0.472079	0.0266225	0.00654777	3.31499e-08	6.01431e-05	0.0277264	0.273759	0.0310224	0.214461	0.584453	0.0389904	0.283616	0.0484632	0.000119698	0.0855564	0.000646244	0.71707	0.860854	0.00257527	0.00608471	0.206387	0.123842	4.97912e-10	0.000226793
p656	0.000245669	0.22584	0.0204796	0.784389	0.189962	0.10649	1.47857e-05	0.00465078	0.0575265	0.606367	0.00201271	0.00884309	0.219965	0.332448	0.0763261	0.0585932	5.88945e-06	0.210253	0.0456428	0.800597	0.222572	0.121031	0.00309512	0.208031	0.953141	5.27523e-05	0.000946582
p657	0.0768614	0.0615328	0.722817	0.119316	0.476961	0.831269	5.32866e-05	0.0705405	0.0145168	0.547802	0.234659	1.8272e-05	0.830534	0.479238	0.105722	0.0457244	0.045052	0.900726	0.192675	0.29141	0.645662	0.540984	0.69704	0.197456	0.32125	0.000177743	0.00383781
p658	0.615524	0.569722	0.111067	0.162231	0.0896321	0.00995139	0.189745	0.57108	0.716869	0.53281	0.848599	0.775007	0.0230689	0.228695	0.934318	0.0285855	0.95628	0.475741	0.0979157	0.0343457	0.486868	0.162518	0.446179	0.943303	0.733735	0.0772052	0.312723
p659	0.00124113	0.388028	0.0758635	0.495028	0.592179	0.0647053	0.0162256	0.0699977	0.397296	0.615956	0.475918	0.1003	0.369153	0.363097	0.101328	0.118954	8.56648e-08	0.489091	0.593641	0.908693	0.695257	0.616977	0.0389777	0.602179	0.745631	0.0157806	0.012928
p660	0.000611798	0.380673	0.32024	0.0794697	0.468314	0.0813984	6.62345e-07	0.0453907	0.106884	0.10794	0.828779	0.849391	0.0208216	0.0511338	0.156491	0.0944744	3.23242e-07	0.234523	0.131783	0.79818	0.579677	0.23315	0.0750111	0.411024	0.512829	6.9398e-06	0.0856131
p661	0.833845	0.217597	0.375277	0.386471	0.711267	0.672411	0.167436	0.574496	0.688913	0.393016	0.66677	0.921254	0.891653	0.151954	0.393799	0.262568	0.47991	0.0240527	0.834911	0.284327	0.723315	0.320951	0.429213	0.746371	0.444349	0.0474223	0.375057
p662	1.24215e-05	0.850361	0.0823932	0.225869	0.0810127	0.00230114	9.07228e-06	0.0111969	0.219466	0.446483	0.0546448	0.310672	0.644081	0.00598229	0.654508	0.869241	9.80964e-05	0.387803	0.0289745	0.611253	0.505258	0.683661	0.233833	0.731646	0.0875644	0.00376087	0.0208641
p663	0.199927	0.938005	0.797996	0.472099	0.235887	0.337616	0.523916	0.38876	0.00925815	0.0407388	0.0274939	0.0935595	0.985933	0.852514	0.938517	0.500396	0.241908	0.873229	0.394183	0.241962	0.13323	0.0128712	0.46288	0.270287	0.982878	0.733924	0.566836
p664	0.000394634	0.312581	0.805226	0.946206	0.0936756	0.110813	1.85888e-05	0.0277765	7.02495e-05	0.949077	0.0296432	0.0132699	0.364911	0.831255	0.226447	0.0770024	0.000215909	0.110773	0.00738621	0.753412	0.431809	0.0375892	0.362807	0.857927	0.00611147	0.000270121	0.0619387
p665	0.284219	0.0230165	0.0652917	0.411187	0.914806	0.178761	0.0233744	0.583042	0.059792	0.373129	0.180056	0.0500394	0.977051	0.992502	0.58675	0.402808	0.648495	0.0695858	0.110588	0.915608	0.559905	0.324413	0.283246	0.224023	0.725021	0.513788	0.797498
p666	0.0341892	0.269518	0.0139343	0.994716	0.192138	0.681174	0.0116705	0.0302412	0.179339	0.488172	0.393519	0.535404	0.322755	0.516291	0.483994	0.0119698	5.30513e-07	0.766526	0.108432	0.195705	0.287436	0.907384	0.230658	0.258386	0.208556	0.0303343	0.0203491
p667	9.59453e-09	0.0734729	0.0412086	0.19297	0.194236	0.00546034	1.71707e-12	6.8904e-05	0.00035901	0.890516	0.0222944	0.0033362	0.573466	0.0546494	0.024986	0.112589	2.1172e-12	0.057113	0.00396047	0.781691	0.167788	0.0996089	0.033161	0.496823	0.0297563	3.64153e-14	6.58738e-06
p668	0.234877	0.757384	0.848425	0.691856	0.642922	0.0246631	2.79216e-05	0.0273672	0.104504	0.774216	0.775994	0.0707571	0.832801	0.676946	0.486194	0.190586	0.11643	0.632241	0.270548	0.435129	0.0318193	0.0674758	0.325379	0.749918	0.0774456	0.0155888	0.351261
p669	1.41887e-13	0.00103166	0.00371206	0.780451	0.224506	0.00585829	2.20821e-10	0.000219155	0.00474417	0.331062	0.0507066	0.00621108	0.391137	0.0875999	0.281406	0.0130803	0	0.913504	0.000827775	0.517526	0.643624	0.0965422	0.000132131	0.418913	0.287564	1.88083e-11	1.62478e-06
p670	0.390801	0.34747	0.02165	0.54792	0.651781	0.356615	0.23881	0.491713	0.221738	0.368869	0.577118	0.865182	0.589544	0.00158527	0.37929	0.910829	0.0605076	0.468821	0.13566	0.511209	0.360845	0.608883	0.0619486	0.909879	0.636855	0.0261872	0.0812833
p671	0.44168	0.338208	0.79291	0.379234	0.0331662	0.325034	0.0751149	0.192996	0.0175347	0.42282	0.0110511	0.00234776	0.0443407	0.641654	0.515693	8.28908e-05	0.153466	0.111045	0.314982	0.555969	0.839124	0.303399	0.203019	0.626952	0.0995039	0.080144	0.0137117
p672	6.51776e-05	0.0214659	0.0327643	0.0934131	0.110779	0.0239227	1.28786e-14	2.82975e-06	6.3456e-05	0.061433	0.0675745	0.000678479	0.83278	0.03672	0.0430019	0.100091	1.26528e-06	0.0235801	1.90161e-05	0.691147	0.737167	0.0487911	0.0082439	0.323565	0.165873	6.95384e-09	1.74707e-06
p673	0.000191773	0.121462	0.162801	0.0268958	0.706011	0.321459	2.66025e-08	0.0324008	0.354629	0.503274	0.425897	0.57176	0.142998	0.720469	0.142493	0.251593	0.000566992	0.304944	0.182684	0.330704	0.762193	0.245703	0.021467	0.134079	0.652294	5.3963e-07	0.0194225
p674	0.0501998	0.261749	0.623942	0.908778	0.735643	0.141419	0.0240566	0.146858	0.156183	0.325362	0.95348	0.525706	0.451779	0.5554	0.394113	0.351753	0.0726968	0.817096	0.145082	0.293564	0.295317	0.902763	0.586886	0.87513	0.645063	0.125903	0.0276273
p675	0.00767329	0.253512	0.146874	0.316378	0.0315185	0.000883156	2.95053e-12	9.04805e-05	0.0488256	0.995323	0.293052	0.216626	0.720469	0.261161	0.31153	0.264361	0.00485934	0.134758	0.00163223	0.241708	0.122988	0.0590373	0.428807	0.277444	0.00597607	9.72426e-06	0.00062541
p676	2.92355e-05	0.0346426	0.599726	0.626441	0.982622	0.0058514	0.0240764	0.0108125	0.0048494	0.659031	0.00939884	0.0184597	0.783394	0.41993	0.409655	0.543169	0.00114384	0.444531	0.0454727	0.431861	0.952683	0.123067	0.457427	0.751013	0.178778	0.00360072	0.0145538
p677	6.30886e-05	0.305423	0.21102	0.709256	0.138414	0.000659332	2.64624e-08	0.00252888	0.0215572	0.27024	0.00275274	0.0420452	0.796167	0.13865	0.188415	0.0945636	2.27468e-05	0.343134	0.245662	0.650709	0.627062	0.0150238	0.23151	0.995221	0.0201094	1.55564e-07	0.000714377
p678	1.34089e-09	0.00931252	0.112114	0.951243	0.125342	0.00208681	3.07726e-09	0.000135819	2.70447e-05	0.704297	0.0177261	0.00672182	0.308261	0.0988552	0.0572884	0.0848736	1.26787e-13	0.159065	4.72705e-05	0.305499	0.359343	0.0852762	0.000631505	0.689716	0.438603	7.77156e-15	0.000107911
p679	0.466828	0.695607	0.492338	0.990795	0.603119	0.623591	0.452047	0.967443	0.883764	0.453007	0.690358	0.373697	0.306394	0.95023	0.802755	0.448646	0.864996	0.189579	0.697717	0.669509	0.693637	0.229781	0.142105	0.151883	0.523328	0.517946	0.512666
p680	0.876042	0.791311	0.921405	0.0340292	0.444924	0.625466	0.245465	0.199778	0.101841	0.0621215	0.0215936	0.141618	0.0549693	0.299938	0.894548	0.169538	0.459841	0.609926	0.0438937	0.578522	0.865483	0.170609	0.0619486	0.698837	0.106832	0.928347	0.0622461
p681	0.338945	0.121817	0.500698	0.455608	0.630311	0.900856	0.344105	0.483264	0.63099	0.524396	0.58323	0.582443	0.907807	0.650955	0.876374	0.237293	0.30525	0.827815	0.264392	0.639835	0.0104017	0.511048	0.676746	0.849763	0.230033	0.49922	0.0436194
p682	0.206953	0.00137774	0.60443	0.924738	0.0843028	0.0156471	1.2406e-05	0.0163844	4.29605e-05	0.0116081	0.498231	0.00331167	0.650142	0.0591085	0.049459	0.021273	0.0234724	0.0324298	0.000242439	0.225779	0.151578	0.0493168	0.0922954	0.322424	0.362623	3.32557e-07	0.000107818
p683	5.37204e-05	0.455919	0.0599739	0.13186	0.0110717	0.101766	2.17322e-10	0.00383067	0.00681905	0.323573	0.00456171	0.00810825	0.744875	0.222501	0.233447	0.00466163	5.62281e-10	0.114741	0.00686582	0.446652	0.363402	0.0031644	0.0339949	0.833295	0.15258	7.61646e-07	0.00173416
p684	3.67025e-06	0.0248887	0.0894596	0.236774	0.566324	0.0134853	8.71664e-06	0.000401151	0.000373821	0.999623	0.0831695	0.00383772	0.338827	0.029859	0.491438	0.0515999	4.45419e-08	0.744708	0.0125453	0.35599	0.763696	0.189114	0.00118573	0.0368873	0.459464	6.42513e-06	0.00140985
p685	0.0165157	0.0813309	0.665231	0.376519	0.0117487	0.000721823	5.19758e-07	4.46613e-06	0.0184546	0.384229	0.162775	0.0124392	0.50675	0.714363	0.187827	0.310157	0.0209374	0.38137	7.043e-05	0.950025	0.036693	0.0381398	0.431875	0.560238	0.0595618	1.49103e-06	9.81508e-05
p686	2.32538e-05	0.0475922	0.139398	0.0376803	0.035074	9.83111e-05	2.11631e-12	6.91495e-06	0.00315417	0.784082	0.170742	0.00492086	0.330857	0.392789	0.615046	0.0991008	4.17145e-08	0.0184351	0.000515509	0.68805	0.463874	0.0579628	0.0121849	0.375757	0.043931	2.26485e-14	4.0807e-05
p687	4.99281e-05	0.00930516	0.320117	0.319721	0.373811	0.029922	8.96526e-07	0.0082953	3.7391e-05	0.814282	0.281675	0.317884	0.754047	0.0811886	0.185373	0.0304998	2.58519e-07	0.29456	0.000726373	0.426691	0.287792	0.414728	0.313663	0.638889	0.141955	1.5357e-06	0.00196517
p688	0.0026941	0.512506	0.0533876	0.884239	0.028194	0.0661278	3.64113e-11	7.59701e-05	0.000812507	0.592143	0.00319568	0.0114942	0.724224	0.0357204	0.214606	0.00858397	1.03016e-05	0.0329391	7.09396e-05	0.445474	0.346676	0.0176807	0.463469	0.929914	0.0056847	1.44285e-12	0.000125091
p689	0.000607952	0.186867	0.374912	0.591696	0.051885	0.00212533	1.51697e-09	0.000660702	1.04736e-05	0.759432	0.107089	0.0159178	0.778359	0.723709	0.734813	0.0230999	8.00676e-05	0.222538	2.43273e-05	0.569525	0.955254	0.000414491	0.421019	0.497587	0.10048	2.64505e-06	5.60073e-05
p690	0.830043	0.262403	0.531458	0.144595	0.488368	0.845397	0.120475	0.526482	0.502649	0.703366	0.00022749	0.0362191	0.448216	0.251878	0.449431	0.443789	0.500738	0.18253	0.520695	0.247482	0.563607	0.609132	0.0825788	0.827996	0.142506	0.118835	0.972309
p691	0.345505	0.215293	0.971969	0.164177	0.616567	0.888496	0.541552	0.182356	0.635151	0.740834	0.418433	0.591928	0.564015	0.449204	0.77474	0.969274	0.431913	0.973266	0.298306	0.0788996	0.155681	0.284759	0.485661	0.273102	0.584529	0.141186	0.201216
p692	0.117202	0.981849	0.892414	0.979979	0.0513954	0.651526	0.425534	0.877276	0.438604	0.501868	0.00830173	0.00655418	0.0238069	0.781188	0.821549	0.0178412	0.155485	0.256586	0.17036	0.913823	0.740517	0.776158	0.180008	0.291845	0.336723	0.277073	0.533179
p693	7.39179e-06	0.00171259	0.113087	0.911459	0.0931543	0.00101933	1.59497e-06	4.19198e-05	3.01945e-05	0.592699	0.0309895	0.0208355	0.507344	0.117613	0.526693	0.0116651	6.60565e-11	0.293956	0.000550381	0.156622	0.680138	0.0228028	0.190537	0.455585	0.449031	1.28649e-07	0.000366732
p694	0.00138637	0.00018831	0.569043	0.000161638	0.026988	0.00568924	9.13936e-12	0.00163422	0.000662224	0.206044	0.845536	0.0310831	0.767516	0.548982	0.406529	0.0920822	0.000273295	0.01333	6.73637e-06	0.778779	0.154687	0.246047	0.0575054	0.310773	0.164076	8.60876e-11	0.00202623
p695	0.0776101	0.0728279	0.333605	0.503391	0.623339	0.13275	1.11829e-07	0.000604301	0.245706	0.926471	0.594793	0.355984	0.49496	0.120668	0.49288	0.172861	0.0268169	0.16052	0.0163586	0.597362	0.183623	0.0274126	0.0905531	0.328163	0.10084	1.746e-08	0.00268095
p696	0.00038292	0.0064098	0.880755	0.390883	0.138668	0.0172714	4.74149e-06	4.92619e-05	0.000272369	0.0140477	0.0146903	6.6823e-05	0.167958	0.30453	0.284865	0.775809	7.8745e-07	0.103356	0.00012477	0.967693	0.336195	0.314061	0.00234242	0.0799205	0.975076	1.66092e-08	0.00926998
p697	0.725132	0.594933	0.710174	0.514555	0.0849456	0.453133	0.000286662	0.0308908	0.691771	0.34985	0.425732	0.763512	0.180337	0.560034	0.928787	0.0253009	0.80422	0.0418834	0.00634229	0.570771	0.410992	0.250121	0.169357	0.731331	0.051315	0.013912	0.044102
p698	0.285264	0.13882	0.793445	0.108265	0.873608	0.812326	0.00182831	0.127783	0.485936	0.607873	0.899322	0.679921	0.70733	0.392931	0.610898	0.176734	0.0516727	0.594977	0.0163355	0.67167	0.424281	0.350896	0.431234	0.435654	0.0737139	0.155664	0.00580429
p699	0.0796034	0.0199172	0.142897	0.0348534	0.0458964	0.0285291	0.681519	0.829902	0.305194	0.14085	0.800003	0.533061	0.223958	0.143188	0.00434068	0.70945	0.171048	0.12078	0.464401	0.516243	0.449933	0.309211	0.188408	0.905644	0.0915146	0.000586829	0.282726
p700	0.000163688	0.084729	0.0849896	0.173696	0.0400207	0.000238718	3.98186e-07	0.00197901	0.0607936	0.995088	0.0666099	0.0804035	0.433485	0.894454	0.566728	0.733747	1.38574e-05	0.7616	1.7547e-05	0.52416	0.682197	0.0860489	0.253989	0.496662	0.285387	3.74389e-12	1.78551e-05
p701	0.309023	0.161422	0.485043	0.346808	0.589478	0.181932	0.746987	0.261756	0.00568843	0.0166231	0.00172868	1.12804e-06	8.86624e-07	0.249417	0.742577	0.627595	0.171405	0.757045	0.0842891	0.766792	0.462726	0.17216	0.970489	0.967245	0.225049	0.432103	0.473483
p702	3.13083e-14	0.004894	0.02544	0.622635	0.165779	0.00919577	3.25913e-08	0.000508936	0.00124068	0.510647	0.0754277	0.0138526	0.855903	0.109408	0.109742	0.0610471	0	0.766937	0.00170645	0.166793	0.332586	0.436876	0.00030822	0.24256	0.31392	1.23765e-11	6.29332e-06
p703	0.801732	0.0976486	0.00947528	0.330986	0.757944	0.407333	0.000284603	0.357802	0.742116	0.575437	0.996867	0.272975	0.205744	0.302607	0.495572	0.987606	0.892297	0.00890397	0.192246	0.779345	0.0519773	0.624767	0.683855	0.501417	0.108678	0.00280592	0.685021
p704	0.827945	0.54491	0.9724	0.0160605	0.390977	0.464222	0.922256	0.902867	0.517433	0.912698	0.602516	0.445538	0.373998	0.449204	0.359164	0.852042	0.976064	0.820099	0.590012	0.289618	0.627345	0.347232	0.485661	0.326615	0.810443	0.099953	0.83998
p705	0.000103978	0.00143076	0.306345	0.338779	0.0292723	0.00406717	1.00568e-08	0.000751376	6.68982e-05	0.290141	0.19539	0.00605946	0.687602	0.0695261	0.0602383	0.000237823	1.05727e-07	0.290432	0.000148293	0.918325	0.135423	0.049968	0.0736295	0.0814425	0.660483	1.50615e-09	7.39312e-05
p706	2.22045e-16	0.00817529	0.116909	0.161556	0.0553117	0.00173199	4.22486e-11	4.86345e-05	0.00162515	0.811359	0.0302252	0.00707629	0.620203	0.0944254	0.0486758	0.519754	0	0.734742	2.01484e-05	0.80505	0.214529	0.380414	0.00296105	0.30317	0.529838	5.88418e-14	1.39542e-07
p707	0.421123	0.218867	0.670956	0.193116	0.319856	0.658494	0.553955	0.692778	0.057093	0.0430493	0.0746008	0.00424522	0.00525235	0.616018	0.780298	0.218057	0.254624	0.547706	0.721231	0.394109	0.348145	0.25601	0.203019	0.123189	0.826292	0.595049	0.129377
p708	0.0204005	0.108968	0.890329	0.0268356	0.00800989	0.0393276	1.44425e-07	0.0178167	0.162609	0.957016	0.89007	0.864857	0.719389	0.974719	0.847443	0.24256	0.00635785	0.0880448	4.1685e-05	0.0695428	0.345326	0.553208	0.0493906	0.506112	0.581644	2.89555e-06	0.0565676
p709	5.57554e-13	0.0309824	0.259757	0.187127	0.0556911	0.000636305	3.27563e-10	1.55472e-05	2.91437e-05	0.8145	0.0135619	0.00294726	0.555661	0.305601	0.192554	0.517502	0	0.933393	0.000707791	0.650778	0.246023	0.236457	0.000992948	0.704404	0.721871	1.02092e-11	0.000304548
p710	0	0.0155732	0.00167049	0.389662	0.106517	0.00070773	1.90401e-10	4.8903e-05	0.00545964	0.404946	0.00289176	0.00458906	0.510705	0.126328	0.0892719	0.0817092	0	0.7833	0.00716154	0.6118	0.443424	0.429856	4.4963e-06	0.838742	0.314108	5.377e-10	8.3149e-05
p711	0.026779	0.491379	0.0776178	0.0272985	0.231047	0.387957	0.104661	0.765788	0.00843083	0.00853233	0.946054	0.037297	0.441564	0.397719	0.766258	0.102822	0.110147	0.557013	0.618172	0.397311	0.950759	0.730152	0.345647	0.222825	0.820254	0.237971	0.0327435
p712	0.121557	0.672859	0.0806687	0.620019	0.848536	0.805731	0.023616	0.568571	0.086282	0.0716554	0.0151935	0.0178922	0.00881126	0.872052	0.220802	0.50436	0.1885	0.0176168	0.678935	0.635038	0.336224	0.900791	0.671345	0.644449	0.185112	0.0819813	0.634095
p713	0.00269848	0.995027	0.460523	0.0723323	0.383959	0.663814	0.127955	0.212056	0.228295	0.389287	0.420058	0.725266	0.643048	0.0296816	0.109385	0.750307	5.30124e-05	0.0256828	0.306733	0.530875	0.109925	0.24419	0.0769668	0.981707	0.778189	0.761502	0.109749
p714	0.0541207	0.078169	0.976781	0.455541	0.438097	0.205367	0.000192255	0.0228156	0.826079	0.227128	0.620106	0.116916	0.137222	0.190332	0.105911	0.273337	0.502204	0.949761	0.00273182	0.191015	0.0030789	0.360718	0.789685	0.208063	0.0428128	0.014496	0.00286336
p715	0	0.00140881	0.0452635	0.229229	0.112131	0.000650419	4.34054e-10	0.000217945	0.000379536	0.648991	0.0438162	0.00278093	0.759612	0.126328	0.236161	0.0514781	0	0.945543	0.000602866	0.461268	0.244618	0.135182	0.00142944	0.354299	0.293989	1.28246e-11	2.15869e-05
p716	0.0256409	8.7488e-05	0.977369	0.0188812	0.659081	0.153589	0.000862727	0.0932323	0.0212199	0.218695	0.341623	0.608445	0.153936	0.0246801	0.769974	0.959003	0.00252017	0.0140337	2.49244e-06	0.61897	0.960167	0.887811	0.238539	0.536186	0.406074	0.000950075	0.087865
p717	0.00436482	0.00667768	0.732357	0.994426	0.802551	0.834491	0.0963132	0.000808742	0.00924592	0.00847268	0.0173095	0.11737	0.101083	0.0953271	0.525295	0.524724	0.00918768	0.772513	0.0386223	0.41861	0.0264454	0.410154	0.223957	0.306781	0.195443	0.0317341	0.00142531
p718	0.00308679	0.0141244	0.79959	0.0817778	0.426175	0.209231	3.73582e-06	0.294149	0.993233	0.167605	0.0667617	0.0144422	0.225567	0.530416	0.443368	0.110123	9.4598e-05	0.0685274	0.00653091	0.14442	0.550726	0.507457	0.0885165	0.0901618	0.306831	4.51056e-05	0.913666
p719	0.00396334	0.511458	0.950438	0.038544	0.330068	0.0171252	4.90798e-06	0.00786189	0.563665	0.904344	0.727137	0.457788	0.25319	0.657889	0.380436	0.173805	0.0381727	0.0370454	0.0534005	0.06967	0.270776	0.0126975	0.21544	0.531478	0.0778558	0.0013873	0.199478
p720	0.0956779	0.637088	0.913748	0.555701	0.031665	0.273835	0.00230976	0.206212	0.624416	0.226047	0.00187745	0.00424451	0.00200183	0.212782	0.463549	0.700218	0.0542871	0.145851	0.00966351	0.167475	0.829512	0.959394	0.0619486	0.0289898	0.460521	6.94543e-05	0.205352
p721	0.13079	0.551273	0.00437021	0.259711	0.597167	0.335147	0.996393	0.965675	0.794962	0.41163	0.457458	0.633728	0.496296	0.00047839	0.0360164	0.541609	0.0184865	0.566795	0.597806	0.059515	0.000442469	0.410126	0.342304	0.669321	0.423602	0.145493	0.34434
p722	1.2916e-05	0.00676002	0.464479	0.00157478	0.0315551	0.00171276	3.64686e-12	0.000237522	0.0150068	0.41432	0.487348	0.124866	0.382559	0.823631	0.408204	0.553554	8.51974e-06	0.0903435	1.159e-08	0.769261	0.908202	0.232987	0.0196064	0.0814211	0.00672653	1.26565e-14	6.04099e-06
p723	0.0341832	0.776889	0.0822767	0.42587	0.353411	0.796363	0.00206602	0.218959	0.65125	0.0577102	0.533613	0.218382	0.405605	0.359238	0.569849	0.0165985	0.0620601	0.140786	0.0729781	0.204342	0.65186	0.0485203	0.169357	0.490203	0.00175855	0.0238918	0.103319
p724	0.00171718	0.213666	0.977603	0.354358	0.422779	0.0101563	0.0353711	0.0355773	3.11903e-07	0.127932	0.000228837	6.83804e-07	0.00052511	0.854667	0.826462	0.0953022	9.7979e-05	0.0405568	0.00986169	0.313024	0.667042	0.49048	0.532464	0.845926	0.81539	0.022297	0.0170897
p725	0.180246	0.97773	0.0746075	0.564031	0.112531	0.0058665	0.429066	0.664712	0.109451	0.647385	0.574522	0.17068	0.292943	0.0885761	0.990524	0.378647	0.53648	0.929527	0.751366	0.160134	0.386523	0.253378	0.329044	0.424813	0.680216	0.372797	0.258808
p726	0.340355	0.534196	0.632748	0.945661	0.049829	0.708056	0.875114	0.103924	0.0659126	0.804585	0.286761	0.987218	0.189691	0.353467	0.165045	0.482128	0.916228	0.582112	0.182505	0.205259	0.349938	0.632798	0.316181	0.831297	0.137252	0.655914	0.627492
p727	0.988444	0.0521968	0.223708	0.351802	0.940849	0.256741	0.222773	0.377274	0.00232827	0.0108838	2.79131e-06	5.61302e-05	3.79945e-07	0.927746	0.269026	0.197956	0.895923	0.138252	0.487651	0.830178	0.886809	0.443446	0.0316917	0.0178928	0.289758	0.181827	0.625967
p728	0.00201521	0.303282	0.0722007	0.9424	0.647607	0.263754	0.205517	0.719873	0.902673	0.163425	0.806501	0.611746	0.667652	0.794203	0.281686	0.16626	0.00379748	0.456427	0.445074	0.863119	0.289246	0.782772	0.131841	0.158671	0.906315	0.0707623	0.210156
p729	0.0141367	0.954907	0.0577328	0.419922	0.310454	0.764563	5.32471e-06	0.00218516	0.564904	0.870546	0.0507609	0.0922782	0.121207	0.203491	0.011743	0.22039	1.60668e-05	0.0725155	0.0224359	0.539686	0.125529	0.0773652	0.0192154	0.1682	0.115943	6.96958e-10	4.24102e-05
p730	3.77493e-05	0.0095273	0.19143	0.84562	0.0047597	0.0145157	3.73102e-12	0.000101431	0.00761392	0.59418	0.0648811	0.0202101	0.954999	0.0634917	0.0725901	0.141417	4.6617e-07	0.411765	0.00133898	0.479886	0.936746	0.00057027	0.0365766	0.309129	0.00152623	3.81806e-12	0.00018331
p731	0.0386652	0.999217	0.148567	0.907709	0.87066	0.124647	0.347638	0.193529	0.918513	0.528953	0.879932	0.406108	0.909871	0.5554	0.567878	0.351753	0.18893	0.234432	0.804501	0.116291	0.871918	0.0348839	0.586886	0.0491115	0.360904	0.56719	0.0853251
p732	1.9955e-05	0.000109236	0.435803	0.0224595	0.113676	0.0159832	4.26422e-10	0.000532665	0.0731554	0.795174	0.209623	0.654619	0.719295	0.652738	0.28266	0.0108185	3.09418e-06	0.0376261	6.47554e-05	0.585153	0.765185	0.223157	0.0134424	0.358017	0.24225	3.71259e-13	0.0018369
p733	0.358188	0.833115	0.75054	0.193583	0.923439	0.969063	0.0132434	0.263007	0.926902	0.595213	0.82085	0.707075	0.372913	0.418742	0.885562	0.105547	0.362944	0.00753904	0.0135704	0.543212	0.651279	0.00728076	0.123621	0.708315	0.190198	0.42889	0.0159442
p734	0.00530627	0.0298391	0.468524	0.0257	0.193314	0.249009	4.70982e-07	0.0183698	0.243297	0.967073	0.584959	0.554381	0.437629	0.29802	0.157666	0.109449	0.0126444	0.0146004	0.00622478	0.162802	0.605507	0.0449511	0.159239	0.361331	0.664221	0.000198721	0.171776
p735	0.645688	0.808899	0.130215	0.284825	0.849515	0.384926	0.0690381	0.0745552	0.245504	0.0584176	0.00232024	0.0106997	0.0011508	0.394329	0.751141	0.35422	0.465854	0.234854	0.487067	0.7022	0.680428	0.788895	0.169357	0.114798	0.142868	0.0460655	0.965561
p736	6.48457e-11	0.0361949	0.0408874	0.60931	0.277141	0.0020834	8.41339e-07	1.2082e-05	0.000665882	0.981458	0.0275264	0.000341409	0.376857	0.191043	0.349644	0.16503	0	0.375261	0.00101752	0.960589	0.942424	0.220375	0.0015577	0.828406	0.401588	2.43993e-07	3.01643e-07
p737	0.751473	0.309162	0.585515	0.763143	0.750702	0.568276	0.513546	0.237806	0.0483739	0.868601	0.711329	0.72552	0.49207	0.887631	0.452325	0.89405	0.726652	0.920731	0.816878	0.814847	0.531329	0.455239	0.156297	0.712914	0.130564	0.757019	0.661983
p738	1.06193e-10	0.00752469	0.019911	0.0673597	0.0302733	0.0199672	4.75728e-11	0.000730538	0.000359828	0.881667	0.171702	0.00914085	0.822049	0.0592831	0.0674069	0.0602256	0	0.193243	1.20498e-05	0.593772	0.134701	0.174151	7.88509e-05	0.852509	0.356076	7.74714e-13	5.37142e-05
p739	3.49303e-07	0.015621	0.13472	0.15053	0.0939259	0.000515455	3.13527e-13	0.000209174	0.0373454	0.928708	0.190591	0.216988	0.730793	0.683889	0.1146	0.0943702	8.21436e-08	0.560471	0.000147681	0.36497	0.784305	0.447037	0.0121849	0.15334	0.00159092	2.18532e-11	0.00391884
p740	0.132312	0.561672	0.12525	0.680814	0.020719	0.0905964	0.00107576	0.106674	0.190919	0.216607	0.100074	0.0778318	0.942068	0.285507	0.903814	0.0110299	0.572657	0.72041	0.661901	0.363971	0.0121741	0.196446	0.884544	0.706885	0.204905	0.045271	0.150602
p741	0.000110359	0.090419	0.147463	0.261302	0.00224588	0.00312127	1.84297e-14	2.88388e-07	0.156248	0.499443	0.49965	0.442861	0.0318425	0.458252	0.0654924	0.0374344	1.56236e-06	0.0295536	0.000163889	0.321526	0.618872	0.109055	0.0121849	0.290235	0.0488884	4.28608e-11	2.30664e-06
p742	0.000848231	0.0107376	0.00720751	0.289068	0.574259	0.00641761	4.9959e-10	2.27496e-05	0.0932551	0.781052	0.293624	0.0819163	0.627113	0.0003888	0.0265114	0.152111	9.45921e-07	0.349584	5.07929e-05	0.848307	0.855726	0.160598	0.108916	0.140162	0.389561	1.50036e-12	1.33369e-05
p743	0.000710713	0.12174	0.0755712	0.248639	0.227984	0.223999	5.45962e-08	0.00100968	0.176897	0.967387	0.0576868	0.101801	0.782717	0.681914	0.19855	0.305406	0.000145872	0.337981	0.000848068	0.925207	0.727716	0.115054	0.0471793	0.732745	0.0483886	2.74267e-11	4.25369e-05
p744	0.239625	0.076023	0.545648	0.932969	0.859223	0.418926	0.0383245	0.0191563	0.00482708	0.92125	0.324362	0.208899	0.950605	0.367911	0.815459	0.0262394	0.122979	0.991125	0.0252626	0.0341172	0.166545	0.672598	0.406816	0.267652	0.273771	0.006512	0.0113148
p745	0.0194947	0.639961	0.780261	0.0635555	0.0798144	0.0349975	0.000122198	0.0492724	0.481095	0.31856	0.0864751	0.0706825	0.00702843	0.152655	0.655136	0.44464	0.0285415	0.036165	0.209608	0.720507	0.332552	0.0789872	0.203019	0.833736	0.574799	0.0021883	0.329361
p746	0.00103914	0.211878	0.390501	0.84917	0.642608	0.460447	0.0924345	0.156458	0.0185531	0.45389	2.79385e-06	2.23337e-06	5.37508e-05	0.790372	0.868561	0.0323605	0.00167009	0.91293	0.0567551	0.92551	0.684824	0.789101	0.492703	0.0713231	0.257581	0.0276754	0.00358033
p747	0	0.0177434	0.0164532	0.187358	0.160469	0.0116819	7.41413e-08	0.00341841	0.018311	0.24389	0.0159257	0.00554167	0.869522	0.445015	0.12161	0.0414193	0	0.312494	0.00981434	0.346002	0.294375	0.183445	2.0077e-06	0.965395	0.538834	4.97095e-08	0.000105923
p748	0.0631543	0.00311121	0.623538	0.0590985	0.125695	0.122177	0.000166582	0.161017	0.869977	0.690268	0.370528	0.803623	0.462211	0.516132	0.252985	0.340404	0.00311423	0.0208798	0.0492255	0.225551	0.779946	0.141035	0.191219	0.505547	0.830641	4.04218e-05	0.271231
p749	0.803395	0.676929	0.53945	0.937135	0.863276	0.90785	0.805	0.505578	0.0302839	0.557515	3.22201e-05	0.00010082	0.00271854	0.155821	0.872335	0.1643	0.122033	0.648762	0.203062	0.777568	0.339925	0.0954651	0.191219	0.297844	0.0134042	0.333651	0.32834
p750	0.367123	0.875003	0.317506	0.644546	0.277082	0.982653	0.753683	0.467933	0.00676883	0.0101828	3.71719e-05	0.000262496	0.000100164	0.678474	0.503236	0.516066	0.757685	0.495051	0.496289	0.314865	0.697056	0.979515	0.159239	0.0302875	0.537958	0.640241	0.776471
p751	0.145125	0.418167	0.705871	0.0758704	0.649967	0.401434	0.144204	0.684597	0.0165969	0.0194891	0.000204894	0.000312316	2.14085e-05	0.115403	0.548689	0.846195	0.579133	0.140746	0.407273	0.936785	0.115389	0.931481	0.471911	0.130228	0.558614	0.392523	0.913978
p752	7.53271e-05	0.0521201	0.0250251	0.802132	0.213187	0.00529212	1.56833e-05	0.000718898	0.00679389	0.535839	0.134804	0.0613892	0.845099	0.204241	0.682205	0.366745	4.14947e-07	0.388427	0.00958439	0.572448	0.874058	0.409421	0.0295612	0.708091	0.18935	1.44201e-07	0.0059859
p753	3.54426e-07	0.00128828	0.4203	0.0524728	0.852437	0.00800053	0.00263347	0.0605953	0.00017299	0.84045	0.0289731	0.00496681	0.722447	0.283571	0.167807	0.657128	6.04407e-07	0.626773	0.00745586	0.145449	0.865443	0.164969	0.10222	0.749016	0.500391	1.08371e-05	0.000559246
p754	0.0188732	0.110307	0.994672	0.0011776	0.918674	0.376983	6.30866e-10	0.0197267	0.00919231	0.452602	0.946633	0.516567	0.313683	0.41837	0.334131	0.0590538	0.0312396	0.0430337	0.00374226	0.813933	0.182458	0.56786	0.149629	0.381131	0.880714	0.00540401	0.0113438
p755	0.159879	0.0135497	0.43133	0.37172	0.606047	0.864127	0.717701	0.333599	0.314708	0.738344	0.0464298	0.0392056	0.105604	0.392931	0.423899	0.193639	0.0563275	0.899873	0.942017	0.348707	0.194442	0.438849	0.52905	0.0307107	0.927929	0.169914	0.290874
p756	0.0128692	0.0128241	0.19693	0.107182	0.876257	0.0198733	0.000141681	0.282115	0.662159	0.551259	0.00526267	0.0908175	0.0832111	0.773397	0.0709629	0.367226	0.00906707	0.0909369	0.00588126	0.340414	0.85251	0.666302	0.191219	0.0808539	0.674538	0.000340715	0.0288059
p757	0.0399211	0.0492167	0.738341	0.804531	0.516527	0.50348	0.00297921	0.847772	0.872799	0.203046	0.00210725	0.0734468	0.0687104	0.198633	0.2159	0.0850667	0.00629991	0.036907	0.370378	0.695968	0.981136	0.166592	0.180008	0.394359	0.563313	0.0186119	0.921098
p758	0.768489	0.532782	0.0260679	0.681047	0.604939	0.984652	0.705244	0.824627	0.00306745	0.000139698	0.000148631	6.76564e-06	4.49515e-05	0.310293	0.634232	0.8621	0.912118	0.577469	0.0532092	0.932825	0.164657	0.787051	0.5401	0.0492306	0.490954	0.620408	0.0935639
p759	4.31256e-08	0.145836	0.0105744	0.393386	0.298206	0.00498366	3.31337e-09	0.0011401	9.06961e-05	0.29119	0.0590626	0.11986	0.454262	0.109408	0.390953	0.0101612	1.71401e-11	0.210664	0.000241461	0.142343	0.766725	0.570337	0.0267387	0.228705	0.520963	5.60582e-10	0.000272324
p760	0.0496496	0.0116236	0.642995	0.0271553	0.983193	0.294859	1.07692e-05	0.612663	0.467839	0.562491	0.0105012	0.259389	0.0917282	0.912711	0.239266	0.154518	0.025911	0.0191771	0.0047701	0.801137	0.555649	0.863928	0.191219	0.0180396	0.713796	0.00175279	0.0455941
p761	0.0158165	0.130962	0.1942	0.405555	0.92559	0.202041	0.0035852	0.458969	0.634139	0.469186	0.0296033	0.148879	0.153399	0.953383	0.3965	0.861932	0.00297851	0.299819	0.00105804	0.877143	0.875432	0.457466	0.149629	0.0738876	0.604217	0.00424866	0.584142
p762	0.0391542	0.0116431	0.397014	0.0225721	0.761825	0.437044	2.68136e-05	0.159668	0.428921	0.973816	0.028026	0.0412147	0.271906	0.67616	0.199427	0.259466	0.0623859	0.000483692	0.00720628	0.291079	0.603044	0.920998	0.169357	0.252887	0.92774	0.0181441	0.508536
p763	0.339723	0.0380397	0.350278	0.21564	0.588233	0.869527	0.00142682	0.225903	0.177855	0.638039	0.0262619	0.726147	0.777626	0.441559	0.20104	0.152153	0.0154394	0.101365	0.0452538	0.35402	0.506615	0.244094	0.228517	0.0973545	0.0707403	0.000566935	0.102167
p764	0.552588	0.2935	0.266687	0.333923	0.375203	0.505272	0.00602465	0.51072	0.615541	0.059864	0.809412	0.275744	0.16842	0.344636	0.875833	0.281412	0.980086	0.0381812	0.687077	0.301516	0.572986	0.357124	0.383961	0.690635	0.0592771	0.0435153	0.486703
p765	2.44034e-10	0.0324956	0.00610234	0.325621	0.121394	0.000894709	0.000270362	0.0205686	0.490803	0.630086	0.111077	0.0138344	0.964126	0.283571	0.251724	0.821534	2.55085e-12	0.68631	0.00745586	0.844367	0.382768	0.557423	4.02547e-08	0.790496	0.509228	9.33579e-05	9.31078e-05
p766	0.401958	0.333047	0.384815	0.424509	0.62934	0.90302	0.782212	0.205091	0.0393863	0.374953	8.33525e-06	2.41651e-06	0.00146925	0.902778	0.906048	0.103255	0.125669	0.270477	0.351433	0.466432	0.81293	0.298398	0.140503	0.520614	0.060041	0.132634	0.0824145
p767	0.259049	0.0744094	0.834899	0.0535169	0.623569	0.128288	2.22044e-06	0.810809	0.299435	0.312311	0.0228413	0.0723157	0.308401	0.0778853	0.0737893	0.2844	0.0240365	0.00981215	9.42234e-05	0.484025	0.0978579	0.834476	0.288221	0.143351	0.761989	0.0202064	0.0535259
p768	0.327246	0.656004	0.217624	0.863184	0.828999	0.15524	0.00631753	0.425741	0.462611	0.121926	0.00918029	0.00272846	5.41219e-05	0.682372	0.2956	0.789438	0.48368	0.194524	0.498716	0.232864	0.756375	0.883969	0.942499	0.115415	0.666044	0.0837172	0.312253
p769	0.00380311	0.552195	0.910436	0.740872	0.0384621	0.057866	0.0269671	0.0306773	3.69311e-06	0.0156175	4.14929e-07	9.95968e-08	5.22547e-07	0.331736	0.777952	0.227386	0.00220664	0.300695	0.0108173	0.39658	0.984352	0.163589	0.682314	0.760365	0.297852	0.110685	0.0750331
p770	0.684346	0.30839	0.0217698	0.580604	0.250158	0.299619	0.00950524	0.132993	0.080574	0.055227	0.868016	0.565444	0.454501	0.265703	0.657858	0.000256725	0.772948	0.628202	0.166096	0.562235	0.834129	0.0595725	0.305252	0.207044	0.0642068	0.00405202	0.0963922
p771	0.67818	0.807029	0.00271028	0.663048	0.0464531	0.147147	0.00111221	0.0740257	0.861027	0.116361	0.925838	0.969123	0.723074	0.302607	0.228118	0.000335849	0.0889858	0.148405	0.0101845	0.247365	0.947447	0.136837	0.342304	0.204979	0.0129248	0.000479571	0.00732848
p772	0.800024	0.181938	0.00836445	0.67993	0.164328	0.113806	0.00517522	0.398764	0.732468	0.0637394	0.321023	0.674973	0.211239	0.449204	0.646904	0.405991	0.419175	0.22283	0.292469	0.484871	0.132458	0.901801	0.485661	0.348836	0.0110672	0.00122338	0.634373
p773	0.459932	0.707496	0.232611	0.195425	0.380794	0.602935	0.474054	0.200357	0.0435191	0.128437	1.65082e-05	2.07801e-05	0.000516849	0.532724	0.456569	0.0826846	0.599647	0.0844893	0.637238	0.87376	0.478902	0.285588	0.0947945	0.531779	0.257126	0.942762	0.522808
p774	0.360311	0.914165	0.00614398	0.181759	0.248527	0.520256	0.00011581	0.055729	0.511878	0.0292167	0.632387	0.569536	0.762519	0.248912	0.849642	0.00579887	0.0265533	0.451898	0.0200264	0.0192721	0.595813	0.370549	0.892307	0.0318257	0.00156792	4.21903e-06	0.0077247
p775	0.757038	0.848536	0.315388	0.253714	0.221515	0.997545	0.622067	0.780625	0.365097	0.587956	0.0162064	0.00143377	0.060239	0.115475	0.478562	0.660028	0.977646	0.012223	0.730126	0.296504	0.39696	0.691345	0.180008	0.680691	0.311741	0.780952	0.767519
p776	0.64834	0.560941	0.897841	0.437785	0.783753	0.840805	0.292934	0.297773	0.768367	0.651317	0.00169591	0.0215542	0.0389396	0.417756	0.796321	0.82523	0.884966	0.03503	0.275723	0.5537	0.0963915	0.939008	0.288221	0.983811	0.629489	0.138672	0.456048
p777	0.270435	0.753006	0.985288	0.0878761	0.0618364	0.45833	0.00876038	0.354519	0.260711	0.806738	0.181686	0.955212	0.479714	0.813587	0.91505	0.211848	0.508589	0.00453301	0.768723	0.38149	0.81758	0.164769	0.383961	0.142223	0.417534	0.150589	0.279342
p778	0.012984	0.129562	0.835114	0.0196414	0.403997	0.322915	5.13957e-07	0.348076	0.270392	0.338573	0.627888	0.867154	0.432862	0.313859	0.822669	0.0455093	0.00183585	0.390495	7.8128e-05	0.721837	0.558717	0.323445	0.0456959	0.17941	0.759603	1.32737e-06	0.0634835
p779	0.0194662	0.148184	0.705082	0.00773095	0.11401	0.134155	3.22267e-07	0.25532	0.506939	0.338082	0.0584712	0.060209	0.150677	0.351453	0.0906789	0.294536	0.000501626	0.0130918	0.0161812	0.0576516	0.432382	0.11261	0.123621	0.102154	0.836495	0.000229744	0.0258265
p780	0.338945	0.121817	0.475504	0.438612	0.636525	0.882661	0.3525	0.475459	0.645621	0.540978	0.555825	0.597169	0.925738	0.650955	0.838391	0.265445	0.30525	0.843995	0.264392	0.611392	0.010257	0.52314	0.676746	0.860949	0.231466	0.513473	0.0449989
p781	0.0979522	0.0468964	0.919039	0.00230447	0.351105	0.00418903	1.24682e-06	0.029692	0.187797	0.669268	0.154347	0.577828	0.103746	0.484042	0.472854	0.672829	0.150429	0.0204483	0.0171342	0.633006	0.197834	0.791229	0.159239	0.193009	0.110166	0.00303265	0.0606533
p782	0.375846	0.0480056	0.279123	0.00612057	0.929991	0.681238	1.00498e-05	0.507392	0.00208785	0.24937	0.416637	0.869695	0.0866063	0.0977472	0.432903	0.125385	0.101348	0.00147594	6.23383e-06	0.356935	0.814461	0.969173	0.203019	0.675722	0.743595	0.00105505	0.0464249
p783	0.000557681	0.2583	0.180532	0.557502	0.85466	0.533998	0.435052	0.0779457	0.658468	0.622063	0.00100116	0.0877487	0.721279	0.965098	0.185868	0.287548	0.000203036	0.155936	0.422136	0.904514	0.112386	0.251419	0.140503	0.132243	0.0243092	0.309338	0.0114449
p784	0.000108808	0.0865001	0.869819	0.69345	0.338165	0.115884	0.00909616	0.0150225	2.24134e-05	0.0865909	4.13492e-06	9.26173e-07	0.00292911	0.864617	0.677732	0.0139355	1.6826e-05	0.204067	0.00472905	0.928474	0.323154	0.117979	0.487347	0.177283	0.0628691	0.00386356	0.00284039
p785	0.000251604	0.747885	0.164145	0.172463	0.146739	0.131884	0.0071571	0.223026	0.119258	0.0173457	0.2416	0.198967	0.111144	0.559089	0.525269	0.00684166	9.51964e-06	0.768215	0.603812	0.320371	0.81508	0.686912	0.0146722	0.619051	0.740756	0.020689	0.0612433
p786	3.38507e-09	0.199384	0.0101309	0.629876	0.075538	0.00209916	1.02561e-09	0.000432797	0.0360352	0.451965	0.0397103	0.00787312	0.645008	0.166876	0.0241826	0.0730608	9.99201e-15	0.660117	0.00361624	0.716177	0.22489	0.183641	0.000890102	0.961965	0.357717	1.84867e-07	0.000957593
p787	3.07902e-07	0.125916	0.066992	0.0440352	0.291911	0.203419	1.87762e-05	0.00393942	0.0383852	0.5226	0.100686	0.060098	0.746825	0.265703	0.350521	0.0930992	1.70728e-11	0.933502	0.0277794	0.0737851	0.773747	0.184288	4.9882e-07	0.178354	0.795463	9.78719e-07	0.0037035
p788	0.14778	0.488432	0.0210697	0.642074	0.880582	0.335139	6.41738e-05	0.19484	0.145909	0.000338849	0.00206166	0.0141532	0.21042	0.181158	0.847172	0.332757	0.0106902	0.0089075	0.477425	0.520155	0.0973543	0.634041	0.0456959	0.0903141	0.651338	0.00180291	0.832213
p789	0.750992	0.932551	0.389474	0.121819	0.254008	0.298603	0.843348	0.89518	0.0401023	0.771923	0.000159985	0.000522164	0.53167	0.99873	0.127441	0.295342	0.929285	0.816369	0.237902	0.791387	0.930558	0.000770806	0.173424	0.528917	0.800122	0.935557	0.049723
p790	0.00388233	0.33793	0.419149	0.364087	0.200889	0.0384851	3.87911e-05	0.0123044	0.0244589	0.519536	0.0983385	0.077292	0.794236	0.671072	0.497266	0.0675484	7.66381e-07	0.460267	0.00202661	0.130854	0.358218	0.300965	0.364246	0.114119	0.205627	4.62231e-05	9.51075e-05
p791	0.183069	0.155377	0.630274	4.40509e-05	0.494963	0.249868	5.18517e-06	0.880457	0.505268	0.866012	0.0150588	0.0312106	0.0806046	0.921458	0.859502	0.341368	0.0140113	0.031877	0.0042205	0.377141	0.716369	0.757777	0.180008	0.0505924	0.579716	0.00780097	0.869323
p792	0.3154	0.00098229	0.812961	0.00431246	0.913065	0.065872	9.15504e-05	0.104147	0.0960473	0.17116	0.00992779	0.0384018	0.0571631	0.24306	0.125919	0.417224	0.176864	0.0290432	0.000649329	0.876527	0.922521	0.261646	0.305252	0.259956	0.877554	0.0105693	0.0400312
p793	0.0558139	0.196791	0.404049	0.949329	0.658235	0.813972	0.0250913	0.0895592	0.428554	0.67309	0.481465	0.691153	0.876316	0.367911	0.21397	0.0282997	0.0401268	0.0407503	0.0252626	0.886963	0.569312	0.122451	0.406816	0.0256726	0.253202	0.00297492	0.0311465
p794	0.340643	0.110029	0.840795	0.89769	0.758748	0.511741	0.894375	0.396709	0.00870745	0.22	2.71473e-05	1.22272e-05	0.00906061	0.746321	0.986307	0.118699	0.694543	0.118604	0.15635	0.867594	0.509515	0.223358	0.203019	0.118826	0.256142	0.0974395	0.0904485
p795	1.23259e-06	0.729851	0.143965	0.104086	0.394998	0.444443	0.00134048	0.0951888	0.00168383	0.122988	0.0353924	0.0881244	0.545463	0.367911	0.205071	0.00415722	4.99205e-08	0.842164	0.0252626	0.656748	0.140437	0.571346	0.641786	0.542998	0.683489	0.00206111	0.00420545
p796	0.00288032	0.274241	0.139047	0.933252	0.0270381	0.026605	2.9516e-06	0.072538	0.788986	0.0163379	0.0735197	0.0684587	0.246757	0.90978	0.434838	0.054028	0.00248184	0.14904	0.15901	0.202483	0.504365	0.864096	0.140503	0.198647	0.420093	9.39605e-05	0.68549
p797	0.257443	0.129513	0.0610914	0.717964	0.869402	0.759462	0.00126077	0.0119976	0.208591	0.761548	0.0656964	0.504767	0.764931	0.155821	0.509445	0.647356	0.0392427	0.505076	0.0199527	0.211295	0.86922	0.573711	0.843045	0.11227	0.0539618	3.5558e-08	0.000410951
p798	0.0358885	0.0178297	0.904489	0.0149563	0.863692	0.135356	3.78529e-07	0.114862	0.490441	0.483496	0.0835994	0.0325603	0.0270425	0.0324502	0.0596976	0.281804	0.0138583	0.038014	0.0189169	0.96124	0.389435	0.23325	0.180008	0.137091	0.630476	0.000752209	0.00598272
p799	0.00526749	0.242472	0.292627	0.0588214	0.169856	0.0224754	1.20495e-05	0.0640592	0.51319	0.327592	0.360659	0.173088	0.0299793	0.362618	0.596179	0.309465	0.00615244	0.015369	0.0847828	0.407129	0.346963	0.179187	0.140503	0.518339	0.558125	0.00103048	0.228379
p800	0.0854821	0.367745	0.374911	0.524873	0.166403	0.446838	0.897903	0.577334	0.0244512	0.430435	1.00434e-07	4.82555e-05	0.000128284	0.312087	0.417737	0.0337919	0.0563868	0.142031	0.264156	0.668626	0.541152	0.976738	0.476835	0.450815	0.0935315	0.114396	0.180747
p801	0.117107	0.301985	0.526564	0.136238	0.464612	0.148763	9.93906e-05	0.369439	0.949403	0.481357	0.0301078	0.0243673	0.189481	0.946529	0.152049	0.7025	0.0260079	0.0140441	0.00195817	0.347746	0.288576	0.938049	0.101428	0.610833	0.619658	0.0026526	0.493901
p802	0.245092	0.0581057	0.646327	0.70892	0.614643	0.397517	0.0372392	0.573693	0.50736	0.660933	0.843816	0.85724	0.684421	0.449204	0.612853	0.0389689	0.0884828	0.782868	0.0607956	0.603087	0.200187	0.449332	0.485661	0.574315	0.949751	0.0154611	0.00760799
p803	0.01336	0.163294	0.858732	0.718061	0.751856	0.961184	0.00383835	2.11935e-05	0.0495918	0.0906379	0.243768	0.0735182	0.770355	0.283571	0.536316	0.636261	0.0012707	0.860926	0.00745586	0.369834	0.677323	0.93131	0.000129753	0.0608496	0.352777	0.000554401	0.0789555
p804	0.107454	0.0353185	0.574466	0.000530832	0.950311	0.0847904	3.05537e-06	0.0607373	0.086439	0.201396	0.0854894	0.310779	0.963337	0.130227	0.438737	0.397291	0.0389664	0.00670985	0.00159527	0.980955	0.0946264	0.581452	0.203019	0.557031	0.519876	0.015874	0.209233
p805	0.984268	0.489896	0.528957	0.786577	0.605117	0.497359	0.000815703	0.0323943	0.204949	0.963358	0.906545	0.526326	0.531256	0.13558	0.391689	0.934252	0.536871	0.20745	0.022971	0.676147	0.740472	0.22924	0.169357	0.971456	0.0193177	6.47307e-05	0.00564976
p806	0.453769	0.96987	0.601057	0.245892	0.894156	0.906912	0.428338	0.806212	0.228463	0.537681	0.0942442	0.0569092	0.0305559	0.178603	0.71353	0.151833	0.793419	0.325098	0.842038	0.687757	0.634989	0.644504	0.21544	0.274409	0.291596	0.668402	0.440261
p807	0.0711518	0.568995	0.304464	0.520695	0.469983	0.833783	0.000649201	0.810761	0.641736	0.0877833	0.00344934	0.0287528	0.00771162	0.259366	0.031908	0.101549	0.00184491	0.0161177	0.686875	0.608562	0.5318	0.407427	0.149629	0.357388	0.333148	0.00459375	0.280958
p808	0.0871021	0.951024	0.00654368	0.685772	0.128259	0.759033	0.0195497	0.793815	0.975666	0.330531	0.946443	0.816964	0.7114	0.41993	0.0770535	0.00610807	0.977428	0.870625	0.214857	0.784134	0.492011	0.462315	0.457427	0.307136	0.134257	0.00173404	0.34774
p809	0.0455148	0.753303	0.768031	0.55141	0.0159861	0.0544489	6.86776e-07	0.000998968	0.0293924	0.558045	0.122055	0.122905	0.803561	0.889456	0.239302	0.240183	0.066978	0.355952	0.00486749	0.269526	0.0199963	0.0120579	0.693063	0.298182	0.0138734	0.00171524	0.00659731
p810	0.540022	0.581989	0.184829	0.0146426	0.272205	0.267612	0.0516804	0.209524	0.000115831	0.0429573	0.00803939	0.000187425	0.0203817	0.150696	0.298092	0.211588	0.583959	0.224581	0.050656	0.327421	0.477554	0.40536	0.21544	0.400911	0.0663345	0.459494	0.142332
p811	0.000296028	0.00643419	0.0340386	0.956663	0.556968	0.0730569	0.000471751	0.00106333	0.000208001	0.457892	4.50435e-05	2.94388e-05	0.00657624	0.218247	0.832111	0.0134601	1.33832e-05	0.275616	0.0129284	0.729933	0.566646	0.40221	0.349478	0.431115	0.477713	1.40904e-07	0.000135148
p812	0.618795	0.606485	0.505843	0.927523	0.646212	0.296746	0.529785	0.323465	0.0165915	0.113802	0.0309201	0.00390196	0.0201239	0.826008	0.90117	0.804622	0.113168	0.92751	0.195532	0.924505	0.655112	0.0471053	0.813542	0.888959	0.289527	0.071219	0.175903
p813	6.94776e-10	0.041542	0.0604785	0.649283	0.125799	0.00260504	5.54351e-10	3.11149e-05	5.99688e-05	0.871737	0.00361827	0.00442825	0.7616	0.109408	0.180564	0.0555818	4.55191e-14	0.220733	0.000308027	0.0666547	0.389643	0.302902	0.000276352	0.706738	0.450018	1.2208e-12	7.02926e-06
p814	7.19333e-09	0.227956	0.33318	0.788499	0.658079	0.606749	0.000944363	0.0163543	0.00226115	0.105965	0.14167	0.183624	0.17968	0.449204	0.268131	0.00377066	9.83967e-07	0.814047	0.247549	0.16221	0.185848	0.230968	0.0159827	0.32646	0.232219	0.00764137	0.200986
p815	0.457486	0.0317048	0.168943	0.702962	0.809849	0.233983	0.287968	0.154841	0.260113	0.892125	0.486353	0.35143	0.789931	0.41993	0.965408	0.088952	0.310457	0.882611	0.220439	0.762743	0.0286895	0.238667	0.457427	0.0368554	0.382809	0.0259161	0.0726734
p816	0.83234	0.320435	0.747523	0.0116683	0.831808	0.10158	0.00746089	0.137385	0.0166859	0.723535	0.0583226	0.0635733	0.43373	0.284899	0.696078	0.00596831	0.649468	0.00766414	0.189226	0.534172	0.42953	0.0180722	0.5137	0.13751	0.514123	0.00403811	0.636693
p817	0.540559	0.498831	0.279951	0.298114	0.975383	0.0990726	0.194455	0.405043	0.116084	0.153097	0.000934982	0.00830034	0.00747811	0.734983	0.388895	0.402772	0.33078	0.287738	0.757414	0.169001	0.440726	0.991151	0.21544	0.571278	0.720585	0.143353	0.923012
p818	0.911136	0.122359	0.365611	0.620167	0.412377	0.421069	0.111966	0.779629	0.776116	0.538072	2.37529e-05	0.000689871	0.00677832	0.534172	0.308628	0.345103	0.641606	0.0644337	0.903223	0.164128	0.847228	0.807298	0.630159	0.313999	0.506729	0.478249	0.212676
p819	0.0708479	0.114763	0.7959	0.0482931	0.187744	0.0141313	0.0200864	0.177252	0.0182016	0.779791	0.840345	0.176501	0.689383	0.249874	0.283061	0.835902	0.246507	0.860502	0.00760835	0.974913	0.0382348	0.116159	0.217888	0.686426	0.776842	0.0092868	0.00635446
p820	0.0116995	0.250748	0.0263741	0.515188	0.332961	0.126454	0.000168917	0.0245088	0.217056	0.196231	0.763023	0.645218	0.838019	0.0811708	0.00264885	0.611669	8.38463e-06	0.136394	0.00361725	0.355417	0.615412	0.727895	0.285537	0.29918	0.649455	3.15029e-05	0.0216155
p821	0.000134323	0.00263821	0.421005	0.271617	0.202501	0.00317324	1.01101e-08	0.00036212	0.306307	0.912367	0.108652	0.079644	0.373441	0.854009	0.0508384	0.744058	5.2e-05	0.55581	0.000119721	0.341094	0.572427	0.83666	0.022282	0.0413261	0.186996	4.78724e-11	0.00516815
p822	0.000137916	0.0694666	0.995078	0.00131871	0.0339249	0.00705107	1.16499e-10	1.39682e-05	1.1238e-05	0.0171331	0.082909	0.0110477	0.275287	0.862579	0.761768	0.38499	3.86223e-05	0.00208965	1.03429e-07	0.795222	0.807511	0.682389	0.181565	0.791592	0.0569947	3.31589e-09	0.000622872
p823	0.0729114	0.18316	0.69323	0.0800087	0.0261057	0.507444	0.00289538	0.620614	0.0157559	0.182176	0.656769	0.529386	0.921363	0.622323	0.725252	0.966794	0.0068737	0.00913468	0.000259744	0.774794	0.316527	0.801064	0.21544	0.0774866	0.417216	0.00126586	0.053118
p824	0.115271	0.039794	0.268696	0.0877621	0.543187	0.0243773	0.000381472	0.0310739	0.475736	0.285822	0.175814	0.174897	0.0137724	0.622229	0.11904	0.989269	0.324777	0.00248203	0.00136903	0.190443	0.356407	0.767718	0.228517	0.947764	0.885056	0.0890009	0.0255309
p825	0.826637	0.631544	0.592212	0.952194	0.928666	0.477658	0.900705	0.47628	0.165779	0.454014	0.000536702	7.88805e-05	0.116035	0.754604	0.0623161	0.761873	0.630836	0.813397	0.615831	0.896365	0.833813	0.00351472	0.761048	0.886937	0.129061	0.898639	0.0848056

## Sheet: Solid Spearman rho value
O.T.U#	M1	M2	M3	M4	M5	M6	M7	M8	M9	M10	M11	M12	M13	M14	M15	M16	M17	M18	M19	T20	T21	T22	T23	T24	T25	T26	T27
P499	-0.022917	-0.0389631	0.111448	0.155278	-0.00146943	0.0396493	-0.0444605	0.0262602	0.0455728	-0.137929	-0.0153923	0.00298957	-0.104708	-0.12956	0.0851678	-0.14009	-0.0387331	0.0721342	-0.170938	-0.140578	0.0891506	-0.0861224	-0.094809	-0.015961	-0.167882	0.121558	0.0524221
P500	0.488183	-0.315677	0.184672	-0.190025	0.217316	0.383231	0.561532	0.336199	0.119532	-0.369944	0.0269781	0.29625	0.0794692	-0.175521	-0.288721	0.105917	0.590366	-0.042634	-0.051838	0.186966	0.236589	0.338238	0.380935	-0.275078	-0.101571	-0.558568	0.477337
P501	-0.104181	-0.0498024	0.0581636	-0.146125	-0.128311	0.0772407	0.0473674	0.0338678	0.0380493	0.0785368	0.135013	0.213171	0.0898828	0.0942266	-0.097224	-0.172623	-0.0356848	-0.150018	0.123129	-0.0930367	-0.0269206	0.259831	-0.0839606	-0.139593	-0.002381	0.100151	-0.281851
P502	0.333044	-0.131344	0.119533	-0.162881	0.395021	0.218616	0.529028	0.516639	0.109035	-0.157496	0.337311	0.422893	0.112634	-0.171965	-0.0915568	0.0702824	0.369444	-0.134369	-0.307044	0.258468	0.188412	0.197565	0.245816	-0.0500164	-0.0587388	-0.526416	0.48066
P503	0.495908	-0.144179	0.0907947	0.0813896	0.233283	0.313584	0.369904	0.15756	0.147298	-0.10033	0.354275	0.273719	0.286603	-0.0184722	-0.293985	0.0852949	0.503391	0.0776632	-0.248999	0.328825	0.15605	0.294424	0.0376161	0.0958964	-0.0510684	-0.491208	0.308704
P504	-0.00197451	-0.00697391	-0.067157	-0.0735081	0.0662919	0.0916579	0.271669	0.265166	0.279091	0.144482	0.0362899	0.125163	0.0527559	-0.0986497	0.106832	-0.000609517	-0.0606655	-0.117454	-0.00558724	0.0800353	0.302573	0.209604	-0.0986497	-0.146987	0.0480039	-0.144041	0.076592
P505	0.181235	-0.067945	0.0746925	-0.158949	0.258308	0.299313	0.491018	0.374879	0.0729371	-0.126987	0.0221113	0.337158	-0.067012	-0.28481	-0.238293	0.19376	0.321984	-0.172036	-0.132312	0.355236	0.239558	0.229038	0.16916	-0.0523076	-0.261281	-0.381126	0.524485
P506	0.199173	-0.0305556	0.0690141	-0.20441	0.389291	0.21694	0.637291	0.328412	0.248023	-0.110455	0.278902	0.177793	0.0784261	-0.0618761	0.141812	0.0855327	0.229616	-0.0852037	-0.163141	0.357458	0.340512	0.210262	-0.0341597	-0.013292	-0.415052	-0.536425	0.311068
P507	-0.0836492	0.0216917	0.0177754	0.157533	0.0426629	0.0413477	0.0718622	0.0227914	0.285981	0.105933	0.169806	0.12516	0.213732	0.00201955	0.0943711	0.0617036	-0.103139	0.117462	0.110305	0.0577924	0.0768061	0.294242	-0.197594	0.0394606	-0.190332	0.0128831	-0.142259
P508	0.203636	-0.118418	-0.0472402	-0.133719	0.287329	0.176468	0.198041	0.120934	0.112367	-0.297863	0.119669	-0.0437755	0.120778	-0.0213211	-0.123127	0.0611249	0.166334	0.120496	-0.0553285	0.043423	0.0984751	0.136465	0.130834	-0.116927	-0.18492	-0.379986	0.291523
P509	-0.10906	0.0665039	-0.0710486	-0.037228	-0.126034	-0.184633	-0.316211	-0.244881	-0.209382	-0.0259148	-0.126415	0.0412849	-0.21698	-0.0914056	-0.0897675	0.146246	-0.0332321	-0.099465	0.0289372	-0.0417529	-0.104813	-0.175818	0.122507	0.154808	-0.279768	0.0139396	-0.0469577
P510	0.440785	-0.0418558	0.131539	-0.128496	0.401352	0.255412	0.527411	0.241543	0.148907	-0.2204	0.411347	0.295591	0.288515	0.017079	-0.183082	0.141966	0.496142	0.0192508	-0.181643	0.271666	0.0418826	0.287089	0.0347791	0.0917621	-0.227814	-0.641367	0.360836
P511	0.0148778	0.0722018	0.0347694	-0.0224334	0.149339	0.161664	0.106411	-0.0403723	0.11921	0	0.03059	0.103897	-0.297215	0.193286	-0.0430931	-0.0941211	-0.0224384	0.14537	-0.121056	-0.0261385	-0.0644572	-0.0383449	-0.157014	-0.101187	-0.000396562	-0.136806	0.0969058
P512	0.658741	-0.299083	0.349393	0.025275	0.41239	0.46502	0.595522	0.244489	0.090403	-0.509958	0.195502	0.302066	0.0903375	-0.18169	-0.240883	0.194582	0.755717	-0.0418418	-0.200783	0.222018	0.215895	0.291953	0.340937	-0.0292208	-0.11004	-0.657124	0.462873
P513	0.479625	-0.21592	0.215894	0.00163649	0.105572	0.421946	0.377826	0.128663	0.118581	-0.328782	0.151721	0.135939	-0.0547468	-0.0498041	-0.191256	0.177068	0.505505	-0.0360988	-0.0337818	0.131482	0.0145692	0.439795	0.243663	-0.0221541	0.180479	-0.40334	0.225375
P514	0.103065	0.00519628	0.094735	-0.0262063	0.207556	0.196616	0.245887	0.210302	0.142063	-0.0691919	-0.0195731	-0.109554	-0.0948725	-0.168285	0.154545	-0.280578	0.0938549	-0.242039	-0.113564	0.155106	0.0477614	0.150888	-0.00384965	0.0440755	-0.273521	-0.221254	0.0990776
P515	-0.0784129	0.0900332	-0.117259	-0.162665	0.110214	-0.0978068	-0.0144863	0.0363876	0.0322305	-0.0382672	0.208366	0.0238557	0.305476	-0.0585072	0.0121417	0.037306	-0.064683	0.143662	0.0670207	-0.0435583	0.113591	0.0853755	-0.175521	0.0542112	-0.0746923	0.0975373	-0.0424489
P516	0.238125	-0.012684	0.145723	0.205412	0.0783497	0.122956	0.248722	0.0113532	-0.0274944	-0.0266624	0.364499	0.319407	0.175985	-0.047539	-0.289289	0.106145	0.280104	0.0833926	-0.035504	0.336782	-0.0131152	0.294583	-0.169358	0.316173	-0.264243	-0.294581	0.0811417
P517	-0.241886	0.0509642	-0.0762081	-0.193611	0.0384475	-0.188479	0.030686	0.190765	0.179556	0.379824	0.0130249	0.135317	0.115383	-0.105638	0.286534	-0.0163416	-0.264993	0.0266205	-0.0159548	0.0912511	0.343694	0.0114243	-0.105638	-0.0843839	0.0794029	0.299507	-0.0636992
P518	0.447045	-0.0608654	0.0351824	-0.168115	0.441308	0.35499	0.628138	0.432251	0.348232	-0.0404218	0.299958	0.234704	0.328083	0.0480969	-0.0383122	0.233864	0.364832	-0.00594812	-0.12695	0.323378	0.264207	0.377286	0.169799	-0.0581265	-0.195441	-0.572983	0.442861
P519	0.370969	-0.267961	-0.050295	-0.0943933	0.0562624	0.32013	0.283161	0.117449	0.119139	0.0722932	0.141135	0.216104	0.0739069	-0.0911041	-0.0810582	0.122649	0.293261	0.126931	-0.205832	0.246089	0.122096	0.285635	0.308926	0.121266	-0.0605582	-0.150337	0.200052
P520	0.322638	-0.224677	0.233443	-0.135339	0.20642	0.122593	0.424648	0.348931	0.21986	-0.0147899	0.240689	0.244619	0.323655	-0.00324624	-0.0806862	0.109847	0.413746	-0.0261581	-0.0924305	0.33479	0.399628	0.155157	0.0831727	-0.0529208	-0.0916044	-0.39108	0.238285
P521	0.403469	-0.132354	0.226409	-0.164869	0.325235	0.233966	0.511649	0.0697303	0.295928	-0.372427	0.225948	0.145829	0.177852	-0.150815	-0.0158288	0.227677	0.473929	-0.125025	-0.0931051	0.254252	0.288567	0.25465	0.145217	-0.0233533	-0.161616	-0.418715	0.188915
P522	0.278779	-0.205904	0.00876346	-0.0783499	0.259108	0.203568	0.366817	0.224257	0.203069	-0.162305	0.2115	0.451412	0.19837	0.124936	-0.108367	0.324804	0.346427	0.00587312	-0.0745707	0.452125	0.0557754	0.475099	0.0576547	0.105133	-0.300167	-0.340095	0.166961
P523	0.0897463	-0.116969	0.252527	0.142953	-0.0814076	-0.111022	-0.100549	0.0071817	-0.0332608	-0.222231	-0.157494	0.0274177	-0.219441	-0.0466293	0.0478275	0.189572	0.0854937	0.0488681	0.23202	-0.145537	-0.141792	0.197305	0.372752	0.128659	0.156607	-0.0938072	0.0263811
P524	0.376879	-0.216268	-0.0566638	-0.123358	0.202431	0.16949	0.498689	0.295034	0.193406	-0.2141	0.219768	0.493592	0.1086	-0.0546595	-0.157571	0.287017	0.476637	-0.147358	-0.052628	0.385771	-0.0269334	0.341055	0.145759	0.0498088	-0.280203	-0.545545	0.259625
P525	0.480994	-0.2953	0.0708329	-0.142551	0.256532	0.351315	0.589931	0.352165	0.256628	-0.248137	0.170378	0.380971	0.215902	-0.219121	-0.185299	0.165807	0.618065	-0.00586951	-0.0303533	0.284324	0.282353	0.436618	0.123259	-0.146636	-0.0223784	-0.500985	0.405786
P526	0.179699	-0.123064	0.0844455	0.0528644	0.084211	0.0525483	0.360921	-0.0426698	0.235816	-0.114727	0.0970281	0.132305	0.0434463	-0.109448	0.0372321	-0.0223033	0.324722	-0.202718	-0.161356	0.166955	-0.0939737	0.299716	-0.0824069	-0.0814787	-0.189985	-0.201805	0.0495424
P527	0.42182	-0.133389	0.154326	-0.0858535	0.21637	0.284033	0.452058	0.102112	0.284862	-0.318869	0.0963952	0.164182	-0.00833181	-0.202307	-0.0325922	0.0654475	0.466933	-0.0530051	-0.157625	0.0173046	-0.0379765	0.375735	0.244183	-0.14802	-0.0578344	-0.45219	0.270443
P528	0.750384	-0.362691	0.173694	-0.0509999	0.248703	0.437139	0.517328	0.302146	0.0419501	-0.427244	0.197352	0.437434	0.103449	-0.144585	-0.277564	0.0952098	0.880686	0.0393287	-0.22929	0.202406	0.0731037	0.359531	0.388365	0.0137351	-0.0758289	-0.646976	0.42733
P529	0.275648	-0.0155676	-0.0738424	-0.168365	-0.0324215	0.278324	0.260143	0.157924	0.158482	0.00942871	0.211155	-0.0397517	0.0821768	-0.108935	0.0309588	0.0623065	0.184256	0.0929289	-0.0818574	-0.00557015	0.153023	0.064721	0.213625	-0.0437932	0.0562753	-0.253719	0.268025
P530	0.67959	-0.269992	0.0516961	0.11976	0.303217	0.361956	0.477158	0.33958	0.140083	-0.32926	0.270209	0.350826	0.0972852	-0.138311	-0.216333	0.137789	0.672636	-0.0560827	-0.21934	0.120228	-0.00425451	0.303358	0.217466	0.0476328	-0.0624962	-0.618901	0.445518
P531	-0.153817	-0.0115404	-0.0784935	0.0414126	-0.127311	-0.286706	-0.113128	-0.00583003	-0.285721	0.136683	0.157976	0.118659	0.047215	-0.0671761	-0.170012	0.106531	-0.16851	0.0968019	0.350168	0.0354254	-0.13219	0.0717913	-0.0671761	0.215175	-0.0403799	0.069393	-0.17967
P532	0.248952	-0.210285	0.0359159	-0.15364	0.0202872	0.0466323	0.131708	0.243057	0.0794583	-0.225957	-0.0337216	0.0499644	0.134713	0.176804	0.0391925	0.188763	0.344017	0.097387	-0.13294	0.132956	0.0175155	0.0936041	0.185441	0.0516227	-0.172234	-0.217006	0.188827
P533	0.292245	-0.0435239	-0.0301594	-0.258772	0.328172	0.231706	0.515698	0.33075	0.314692	0.0801943	0.22565	0.178917	0.0702539	-0.0620002	0.0712838	0.0561204	0.240029	0.0160539	-0.205424	0.177793	0.120521	-0.0142814	0.100891	0.0393825	-0.191594	-0.330224	0.485267
P534	0.559731	-0.278813	0.122186	-0.11241	0.336009	0.346207	0.710251	0.362577	0.153562	-0.394062	0.204337	0.246874	0.0789134	-0.200285	-0.174457	0.106492	0.634307	-0.134286	-0.135298	0.19531	0.0698399	0.352187	0.318433	-0.0695164	-0.225497	-0.621136	0.474976
P535	-0.323918	0.373258	0.0582393	0.18854	-0.0159376	-0.403095	-0.410245	-0.396904	-0.0541573	0.0882395	-0.145421	-0.067642	0.00850377	0.286616	0.0676046	-0.108518	-0.290164	0.0898154	0.0890823	-0.0414291	-0.225781	-0.131383	-0.31668	-0.003321	-0.05671	0.260553	-0.361057
P536	0.578638	-0.212314	0.139687	-0.129389	0.374315	0.433997	0.731131	0.350677	0.265233	-0.321816	0.222914	0.235936	0.102912	0.0645806	-0.117119	0.108978	0.497349	-0.108464	-0.115028	0.256128	0.153816	0.365508	0.311443	-0.084127	-0.277949	-0.678218	0.490265
P537	0.693574	-0.251668	0.109516	-0.15034	0.279517	0.370958	0.46858	0.284223	0.160367	-0.307202	0.185001	0.343398	0.0821659	-0.138311	-0.188526	0.184587	0.770444	-0.0105694	-0.21934	-0.0133902	0.0781884	0.289949	0.480557	-0.0419735	0.00593856	-0.618901	0.40397
P538	0.366794	-0.16851	0.172344	0.248103	-0.0536646	0.0755423	0.0999884	0.149938	0.0331857	-0.324161	-0.0331122	0.169975	-0.137539	-0.0671761	-0.109603	0.0832876	0.28514	0.0330923	0.105701	-0.015709	-0.129859	0.199069	0.234913	0.194331	0.153508	-0.220931	0.161646
P539	0.246325	-0.231448	0.0581266	-0.221282	0.244313	0.197471	0.545839	0.294074	0.245044	-0.195671	0.144237	0.225207	0.294473	-0.163191	-0.125863	0.269999	0.389791	-0.183893	-0.160879	0.246192	0.155478	0.419268	0.19539	-0.1597	-0.206917	-0.496343	0.235507
P540	0.664651	-0.258197	0.227416	-0.00910604	0.314845	0.373187	0.628119	0.351479	0.161336	-0.370239	0.312979	0.45635	0.0977027	-0.187869	-0.321026	0.149845	0.727855	-0.142959	-0.209712	0.246399	0.07355	0.299587	0.271608	-0.0389306	-0.129714	-0.744065	0.546002
P541	-0.102801	-0.0343313	-0.119847	-0.0222323	0.0724548	-0.0208084	0.0310512	-0.0163976	0.15891	0.199719	0.0761648	0.0279823	-0.0164349	0.0612076	0.177487	-0.100884	-0.261596	0.234014	-0.0862829	0.0278541	-0.160436	-0.0729153	-0.139176	-0.0266946	-0.354975	0.0742063	0.0243
P542	0.0323163	0.0501875	0.101379	-0.0425166	0.14867	0.0956227	0.0892097	-0.169249	0.245218	0.0109708	0.120751	0.21503	0.0676109	0.138179	-0.0900758	0.149563	0.0248407	0.045089	-0.0609468	-0.153791	-0.265678	0.25771	0.0903161	-0.191315	0.0656081	-0.138641	-0.0501812
P543	0.418292	-0.086244	-0.142575	-0.036576	0.390037	0.202402	0.457222	0.225266	0.373122	0.115502	0.162231	0.214039	0.173626	-0.0368504	0.0671687	0.0383159	0.376333	-0.000431023	-0.304771	0.29941	0.265038	0.135406	0.0233067	-0.0102909	-0.102731	-0.474981	0.238774
P544	0.43403	-0.222671	0.0776564	-0.108371	0.162504	0.352694	0.498258	0.28798	0.222528	-0.225776	0.118323	0.329674	0.0158509	-0.157014	-0.144701	0.178313	0.553912	-0.0696221	-0.248999	0.169481	0.115126	0.300804	0.204034	-0.0659371	-0.0965409	-0.665404	0.487422
P545	0.286774	-0.0320794	-0.128047	-0.0499776	0.221657	0.239056	0.333335	0.0238835	0.289115	0.124261	0.091169	0.354835	0.110845	0.0685356	-0.0818178	0.0847396	0.194735	-0.0634391	-0.256142	0.0702645	-0.13859	0.284246	0.0540118	-0.0510405	-0.257507	-0.276965	0.114091
P546	-0.33335	0.0671936	-0.2678	-0.264056	-0.0403122	-0.150315	0.0959527	0.118926	0.226263	0.370017	0.0790813	0.14196	0.0133607	0.0812646	0.241777	-0.00523519	-0.209551	0.0215494	0.0123681	-0.0900734	-0.0349306	-0.0604321	-0.238306	0.00273024	-0.0622253	0.0459439	0.0290865
P547	0.600116	-0.362691	0.350474	-0.0683449	0.304102	0.379128	0.623507	0.252283	0.0860373	-0.476724	0.111549	0.39762	0.0473414	-0.144585	-0.31449	0.182201	0.740358	-0.125457	-0.0776607	0.193574	0.0446924	0.351011	0.412901	-0.19289	-0.0858995	-0.646976	0.45771
P548	-0.306859	0.264608	-0.214436	-0.180261	-0.205959	-0.16742	-0.167569	-0.192553	-0.0145073	0.223305	-0.14125	0.0217975	-0.0406029	0.129542	0.0686451	-0.346628	-0.348828	-0.209048	-0.0488743	-0.0331197	-0.0588483	-0.0433429	-0.119407	-0.19654	-0.041158	0.218281	-0.387407
P549	0.665112	-0.238891	0.298831	-0.0896271	0.385864	0.437463	0.63511	0.302674	0.0722723	-0.368419	0.29631	0.371674	0.091937	-0.163191	-0.290826	0.15692	0.794908	-0.0843751	-0.173651	0.109986	0.0995164	0.308079	0.399132	0.0532767	-0.0910019	-0.730231	0.492852
P550	-0.39033	0.169941	-0.106229	0.0447249	-0.188158	-0.184966	-0.325999	-0.146894	-0.123408	0.058711	-0.0595993	0.0397124	-0.044546	0.133749	-0.00838212	0.0296352	-0.201811	0.195281	0.0428619	-0.156571	-0.0380135	-0.172188	-0.188093	0.0701	0.091011	0.268044	-0.207099
P551	0.271015	-0.0614538	0.230492	-0.167984	0.554277	0.221223	0.459062	0.279037	0.102118	-0.178151	0.228622	0.304397	0.0648297	0.0788666	0.027666	0.0853759	0.32129	-0.0301185	-0.15971	0.235731	0.324271	0.147892	0.16948	-0.0440064	-0.159248	-0.544125	0.306297
P552	0.41889	-0.264553	0.11464	-0.214746	0.267843	0.342885	0.567007	0.306758	0.208504	-0.303768	0.0793923	0.319513	0.104007	-0.200285	-0.314836	0.190984	0.527126	0.0164896	-0.0526617	0.217932	0.233119	0.305548	0.307811	-0.252291	-0.165221	-0.575955	0.464844
P553	0.0920707	0.0397768	-0.0550892	0.0457491	-0.0557816	0.151686	0.102742	-0.0637783	0.232009	0.0608225	-0.081414	0.105035	-0.110919	0.0804761	0.0938672	0.063292	0.118733	-0.155773	-0.198597	0.0972212	-0.0526461	0.0868949	-0.0975246	-0.0381554	0.0239538	0.0984344	-0.0933121
P554	0.282143	-0.0863955	0.0835202	0.136777	0.0425505	0.0634019	0.0547576	0.0179407	-0.0044054	-0.201961	0.224484	0.109946	0.176917	-0.0914056	-0.412021	0.0420611	0.264467	0.17074	0.180669	-0.0628163	-0.0436434	0.214293	-0.0914056	0.13003	0.23965	-0.195057	0.168712
P555	0.35308	-0.0725638	0.191704	0.0990362	0.248714	0.242097	0.153813	-0.0748065	-0.176542	-0.215576	0.129639	-0.0769841	-0.0341846	0.0952933	-0.0307193	0.119496	0.253122	0.0691594	-0.150756	0.127796	0.0908764	0.154712	0.0441614	0.260719	-0.0196733	-0.331531	0.138642
P556	0.22342	-0.145858	0.0603678	-0.14282	0.17713	0.0462625	0.261244	0.186192	0.180137	-0.0496747	0.200646	0.227034	0.178893	-0.0622794	0.0858281	-0.013922	0.204293	0.101634	0.137347	0.315733	0.045907	0.215311	0.0436323	-0.0100208	-0.0512655	-0.29217	0.246171
P557	0.464195	-0.248954	0.226288	-0.0835985	0.438137	0.412951	0.635859	0.371354	0.123471	-0.331781	0.310449	0.290323	0.169685	-0.187869	-0.226918	0.280625	0.605299	-0.208076	-0.136689	0.18592	0.100273	0.457651	0.282373	-0.086585	-0.125884	-0.694674	0.561761
P558	-0.00663278	-0.216357	0.0853362	-0.186906	0.291687	0.215478	0.236386	0.192623	0.161068	-0.223156	0.191361	0.232043	0.0558258	-0.0289344	-0.136824	0.313848	0.184656	-0.016335	0.0929036	-0.037946	0.0670209	0.256847	0.175202	-0.136994	-0.0582801	-0.405555	0.271741
P559	0.181785	-0.0385111	-0.00171393	0.219096	0.284887	0.16837	0.178605	0.027712	0.159856	-0.22275	0.237304	0.120926	0.0834895	0.0257041	-0.107834	0.356699	0.211782	0.0412754	-0.00877455	0.254525	-0.0148052	0.268485	-0.144585	0.113148	-0.0159107	-0.207555	0.239972
P560	0.240471	0.104527	0.0626088	-0.179783	0.149303	0.191286	0.371229	0.0759883	0.284551	0.0347763	0.134088	0.362979	-0.00171246	-0.0647528	0.100473	-0.00507308	0.369286	-0.160755	-0.366498	0.0371032	-0.107127	0.102286	0.132865	-0.0722055	-0.00793208	-0.345201	0.199712
P561	0.339955	-0.0291823	0.14859	0.123066	0.212753	0.354792	0.432691	0.0382478	0.317361	-0.225563	0.210121	0.144145	0.0471954	-0.178024	-0.149351	0.135357	0.453686	-0.0709073	-0.172755	-0.179541	-0.136043	0.301069	0.109575	-0.0254574	-0.0254039	-0.513396	0.216949
P562	0.464056	-0.268183	0.35902	-0.0761877	0.372564	0.308707	0.425464	0.240358	0.0226433	-0.449205	0.132204	0.231167	0.161639	-0.212808	-0.0931679	0.191497	0.524917	0.114194	-0.022656	0.194528	0.174948	0.398638	0.268565	-0.0765429	-0.154551	-0.448703	0.330391
P563	-0.131978	0.012852	-0.0375789	-0.105638	0.124094	-0.00322472	0.0753432	0.0920609	-0.0870426	-0.0604029	0.258825	0.0296315	0.0442456	-0.0576386	0.0600363	-0.0914056	-0.144585	-0.0177233	-0.0914056	-0.0679434	-0.00294184	-0.00399056	-0.0576386	-0.0109142	-0.250961	-0.257915	0.0710974
P564	0.444396	-0.200675	0.200181	-0.103831	0.252986	0.0399259	0.426519	0.103406	0.231835	-0.217454	0.195511	0.248411	0.0152179	-0.119309	-0.145885	0.113331	0.418764	-0.127714	-0.07846	0.126554	0.116163	0.148873	0.0705482	-0.0577595	0.00579086	-0.50717	0.350779
P565	-0.111189	0.187404	-0.231308	-0.0531073	0.11939	-0.0952385	0.0643399	0.108639	0.320247	0.365824	0.0806002	0.0678283	0.255788	0.133026	0.217994	-0.0368412	-0.264993	0.197523	-0.0269782	0.172195	0.120471	-0.161272	-0.105638	-0.161315	-0.0895942	-0.0523486	0.0788046
P566	-0.0754234	0.153548	-0.0262432	0.10168	-0.0754418	0.168724	-0.18748	-0.394757	0.0551878	-0.0343496	-0.0670492	-0.29606	-0.0784707	0.0557842	0.124012	0.0170097	-0.126895	-0.00198158	0.0983509	-0.5451	-0.160066	-0.0219194	-0.00091675	0.0939074	0.0969872	0.0789855	-0.290932
P567	0.0330312	-0.176581	0.00806745	0.0386935	-0.192133	0.074302	-0.0563492	-0.134988	-0.0443901	-0.0496392	0.0781457	-0.00262404	0.0703225	0.119339	-0.205628	0.100607	-0.036236	0.213064	0.0434821	0.0324071	-0.0510179	-0.00153408	-0.154994	0.1284	-0.174026	-0.0480986	-0.057581
P568	0.143981	-0.247461	0.226028	0.114508	0.249897	0.0904752	0.195428	0.112506	0.103768	-0.351323	0.128991	0.0967548	0.173823	-0.0986497	-0.282023	0.432351	0.217016	0.151445	0.163046	0.215742	0.0332783	0.346302	0.123163	-0.0105369	-0.0665936	-0.303892	0.365294
P569	0.0437306	-0.0152824	0.0633744	-0.0624431	0.0891791	-0.0181133	0.107251	0.256704	0.251944	0.0527228	0.173249	0.188612	-0.165103	-0.228369	0.00498339	-0.160136	0.02946	-0.0544974	-0.000810658	0.0242035	0.305403	0.0753193	-0.0261491	0.0612839	0.177813	-0.16232	0.294262
P570	0.151304	-0.255215	0.164192	0.210938	-0.029121	0.0161006	-0.138889	-0.00902139	-0.219618	-0.460245	-0.111563	-0.00707034	-0.244428	-0.0296057	-0.0944444	0.0330165	0.169684	-0.14529	0.360814	-0.0103934	-0.191407	0.129448	0.190558	0.0145835	0.110173	0.0163685	0.0940833
P571	-0.125195	0.0897834	0.184987	0.0417246	0.179184	-0.0109135	-0.163704	-0.29016	-0.207213	0.0355517	-0.0584592	-0.0730008	-0.0238282	-0.0518657	0.0483778	0.189291	-0.166142	-0.0472288	-0.0683793	0.0123247	-0.05577	0.164031	0.0261623	-0.126444	0.0166558	-0.037081	-0.159526
P572	0.383406	-0.147774	0.0696501	-0.234152	0.311292	0.252574	0.491777	0.354187	0.324777	0.095575	0.162026	0.50911	0.0477833	0.0627048	0.0249567	0.0236229	0.37112	-0.062883	-0.235176	0.242556	0.212321	0.253322	0.280692	-0.2015	0.0771625	-0.507288	0.393227
P573	-0.172914	0.0894688	-0.343417	-0.230138	0.0529509	-0.290793	-0.0292534	0.0133024	0.288172	0.526961	-0.0864391	0.0387322	-0.067484	0.0837122	0.301021	-0.199131	-0.314986	0.0951566	-0.199131	0.137131	0.030893	-0.222092	-0.125568	-0.121733	-0.0201679	0.223101	-0.0264246
P574	0.122254	0.0437932	-0.0645515	-0.127386	0.187634	-0.0763914	0.176995	-0.0386674	0.179083	-0.0167282	0.342034	0.352442	0.173519	0.0188519	-0.0257218	0.363646	0.169956	0.0596828	-0.0970654	0.237698	0.0414043	0.115009	-0.00548419	0.106462	-0.252542	-0.269337	0.141721
P575	0.556703	-0.198585	0.228009	0.11048	0.105611	0.293757	0.470511	0.221029	0.0994832	-0.290228	0.155135	0.337871	-0.0809281	-0.175521	-0.193178	0.03051	0.67058	-0.142177	-0.158912	0.0535264	-0.134714	0.390379	0.306684	-0.0209053	0.0566053	-0.593922	0.413536
P576	0.649688	-0.172698	0.106584	-0.00407863	0.340062	0.298984	0.449322	0.32769	0.140853	-0.129071	0.243891	0.41379	0.0907055	0.00556347	-0.180748	0.113573	0.612587	0.21769	-0.187822	0.167192	0.0393723	0.226662	0.306598	0.0528245	0.00437935	-0.567026	0.52835
P577	-0.181495	-0.103963	-0.0394295	-0.0866577	0.0313724	0.0345344	-0.14096	-0.0467876	0.0912913	0.0922411	0.0652061	-0.0359478	-0.0865109	0.00440119	0.0731144	0.205711	-0.212112	-0.110163	0.0423138	0.0293141	-0.213592	0.163695	-0.0935253	-0.0946105	0.288993	-0.0172322	-0.0322908
P578	0.148134	-0.0755206	-0.0111044	-0.22145	-0.0722647	0.0385722	-0.120188	-0.150895	-0.051579	-0.0805701	0.018383	-0.0106803	-0.0317655	-0.269112	0.0801371	0.142744	0.263402	0.0541631	0.165455	-0.119004	0.0176061	0.0882988	0.0018335	0.176153	0.257442	0.0291627	-0.0693264
P579	0.446693	-0.210421	0.127721	0.00720895	0.377175	0.275232	0.556499	0.357491	0.0577846	-0.250058	0.310076	0.405069	0.138579	-0.0452335	-0.148373	0.0599379	0.470852	0.0252637	-0.148508	0.269221	0.0572055	0.281603	0.017079	0.0100282	-0.16255	-0.668484	0.474299
P580	0.207384	-0.00653615	0.0749101	0.0749904	0.23048	0.160427	0.224814	0.267853	0.0108461	-0.0187478	0.166866	0.187621	0.121281	-0.0671761	-0.214559	0.098783	0.285957	0.0822266	-0.106531	0.0120222	0.0271612	0.00259584	-0.0671761	0.106145	0.0386173	-0.300593	0.428175
P581	0.349389	-0.0361982	-0.0848759	-0.109589	0.22693	0.0512609	0.460345	0.13759	0.149407	-0.0252193	0.411697	0.342597	0.252738	0.0288396	-0.164524	0.196649	0.263121	-0.0272019	-0.199001	0.257321	0.0333054	0.272625	0.103036	0.0250494	-0.218347	-0.472702	0.213233
P582	-0.191001	0.113035	-0.21606	-0.105671	-0.115158	-0.0539957	0.00184219	0.18743	0.198459	0.0212689	-0.0948708	0.107266	0.0565982	-0.0120206	0.0862478	-0.0648518	-0.136091	0.00958066	0.0808297	-0.104624	0.167426	-0.124163	0.0330831	-0.0816101	-0.00561029	-0.0614909	0.0263814
P583	0.418163	-0.143807	-0.0214692	-0.159528	0.419363	0.27987	0.656359	0.401131	0.441882	-0.0904957	0.252289	0.398773	0.173611	-0.0236861	-0.0475216	0.183493	0.48277	-0.0936119	-0.167657	0.300396	0.132006	0.250438	0.158485	-0.0166469	-0.229574	-0.482431	0.368558
P584	0.363769	-0.238517	-0.00474036	-0.13989	0.146593	0.295676	0.33542	0.119298	0.320241	-0.222026	0.0561251	0.240713	0.036818	-0.0287713	-0.0943394	0.075183	0.415414	-0.0616091	-0.0270389	0.0651552	0.225744	0.340798	0.102882	-0.14406	0.104023	-0.429936	0.175729
P585	0.653141	-0.233344	0.114233	-0.15034	0.20304	0.246831	0.370359	0.317264	0.0528524	-0.355559	0.181451	0.188936	0.137909	-0.138311	-0.0643815	0.120291	0.654252	-0.0533864	-0.21934	0.100332	0.0672212	0.173845	0.394936	0.0957372	0.0888898	-0.539401	0.371345
P586	0.206412	-0.181887	0.213878	-0.0921306	0.318948	0.273533	0.474438	0.197399	0.124226	-0.182792	0.0702086	0.285082	-0.00955286	-0.206531	-0.236904	0.204308	0.341418	0.0165943	0.0133392	0.274996	0.229884	0.458918	0.194364	-0.16173	-0.19832	-0.435125	0.29636
P587	0.416412	-0.238799	0.0392495	0.231136	0.284128	0.312312	0.26391	0.21203	0.124575	-0.318155	0.221613	0.208195	0.128464	-0.131978	-0.236691	0.24158	0.532483	0.151975	-0.209297	0.0932667	0.137669	0.210814	0.0343328	0.171682	-0.0265896	-0.462839	0.338681
P588	0.00397149	0.146278	0.0636945	-0.149454	0.262456	0.0819897	0.0188312	0.245463	0.20832	0.126912	-0.0444711	-0.0142136	0.135247	0.188175	0.37381	-0.0145771	0.0173822	-0.0175833	0.0211804	-0.162613	-0.106884	-0.0246184	0.169293	0.0786933	-0.0621934	-0.0624909	0.0690385
P589	0.464732	-0.313352	0.123969	-0.0425073	0.312696	0.234856	0.465168	0.380692	0.192347	-0.325622	0.324066	0.336306	0.200032	-0.157014	-0.19502	0.135209	0.579412	0.0778397	-0.116719	0.0747128	0.0303393	0.310908	0.324327	-0.06543	-0.127869	-0.646641	0.420411
P590	-0.332797	0.160019	-0.0814594	0.149657	0.16982	-0.273019	-0.211592	-0.0141058	0.30597	0.268021	0.132213	-0.200443	0.192062	0.11457	0.182399	-0.0371511	-0.539338	0.0915	0.0967556	0.139566	0.0875125	-0.110382	-0.334048	0.0475857	-0.0192685	0.211393	-0.19301
P591	0.152603	0.0968147	0.0209646	-0.00115751	0.0524918	0.107285	0.246944	0.0194699	0.0270458	-0.135571	0.285441	0.183632	0.221888	-0.104208	-0.182588	-0.00940036	0.190516	0.0290093	-0.0443942	0.107869	0.135864	0.096078	0.0494041	0.0791517	-0.316071	-0.331362	0.0670476
P592	0.193291	-0.065167	0.028392	-0.00103461	0.203822	0.116045	0.295543	0.179389	-0.0553514	-0.108379	0.372091	0.230294	0.272295	-0.0838294	-0.317806	0.0317675	0.336031	-0.0316489	-0.13294	-0.00613437	0.0628419	0.0534495	-0.0838294	0.076567	-0.0179965	-0.375111	0.267737
P593	-0.0750438	0.188576	-0.207578	0.039314	0.0738775	-0.115021	0.0543729	0.0476557	0.236572	0.255444	0.0893047	0.0315082	0.177842	0.0432946	0.2651	-0.0728493	-0.169225	0.111838	-0.188811	-0.0314062	0.159981	-0.077089	-0.11906	-0.016069	-0.0465759	-0.0627355	-0.0463869
P594	0.281202	-0.256414	0.318202	-0.0989675	0.135082	0.127168	0.346981	0.133786	0.0259534	-0.551456	-0.0385054	-0.000941705	0.182337	-0.257915	-0.275393	0.0933597	0.365087	0.112624	0.079227	0.127638	0.206171	0.10797	0.0822296	-0.189308	0.0689787	-0.396123	0.215869
P595	0.0772158	-0.160608	-0.0222087	0.123046	0.12914	0.0352536	-0.156846	-0.17251	0.109756	-0.203464	0.013094	-0.383763	-0.0244805	0.0549133	-0.0394732	0.20368	-0.0302634	0.161643	0.106793	-0.000360946	0.0463948	-0.035546	-0.179225	0.230057	0.0819051	0.0707066	0.0660024
P596	0.671703	-0.308386	0.311648	0.0919972	0.347619	0.390726	0.627307	0.245185	0.0822273	-0.374406	0.262248	0.311283	0.164164	-0.150815	-0.329977	0.118032	0.666126	-0.0908104	-0.11081	0.303195	0.0560175	0.340748	0.22588	-0.0781592	-0.0554009	-0.674853	0.477529
P597	0.562078	-0.169777	0.0724922	-0.104771	0.361887	0.406513	0.692649	0.453651	0.26166	-0.131	0.324619	0.322437	0.260371	-0.0697893	-0.119014	0.0256067	0.514423	-0.0719973	-0.0666039	0.168325	0.217201	0.402695	0.324838	0.0667715	-0.177023	-0.659314	0.447608
P598	0.326284	-0.28289	-0.0224746	-0.132754	-0.0143224	0.260006	0.214493	0.00936561	0.0567835	-0.100339	-0.147082	0.109464	0.0168916	-0.163493	-0.103747	0.000469644	0.418279	0.116442	-0.240896	0.0999032	0.0384441	0.0816925	0.173214	-0.145487	-0.115678	-0.133465	0.115724
P599	-0.134013	-0.00611597	0.0499414	0.00979937	-0.0134037	0.0346308	-0.324026	-0.0474732	-0.336971	0.0979076	-0.130586	-0.191482	-0.0995311	0.0494039	0.10267	0.0426723	-0.0782201	0.116933	0.0762495	-0.288921	-0.0712803	-0.0916433	0.0481207	0.140854	0.231457	0.200113	-0.133707
P600	-0.371441	0.207538	-0.245584	-0.0737954	-0.109473	-0.280262	-0.363348	-0.0676262	0.0324851	0.264663	-0.122377	-0.180579	0.130723	0.185487	0.224796	-0.0236491	-0.52529	0.130911	0.0251566	-0.068009	0.0459328	-0.254822	-0.0887233	-0.104334	0.146409	0.435094	-0.321179
P601	0.0802153	-0.0534268	0.0689332	-0.193611	0.192238	0.115783	0.305012	0.248442	0.253267	-0.252824	0.101491	0.134808	0.141696	-0.105638	0.0281662	0.0930699	0.176055	-0.0114042	-0.0049315	0.0419004	0.285761	-0.0255983	0.109266	-0.089875	-0.186972	-0.4321	0.329868
P602	-0.00864109	0.039244	-0.0934433	0.148859	0.0263165	-0.0192475	0.0306797	0.213781	0.199296	0.0837791	0.0835904	0.234625	0.00384795	-0.112428	-0.113493	-0.0198206	-0.0806759	-0.00846874	-0.0362143	0.000858482	-0.0149553	0.0627234	-0.112428	-0.029089	0.0358287	0.0126948	0.0569463
P603	-0.00114859	0.0205125	0.12989	0.0632364	0.0478571	-0.0647027	0.141202	-0.063632	-0.133267	-0.0286805	-0.000414706	0.159607	0.0588721	-0.187869	-0.218363	0.0764701	0.101679	0.0674943	0.00597972	-0.0211921	0.0365707	0.135336	-0.0626231	-0.191759	0.0463613	-0.18809	0.156178
P604	0.154801	-0.247461	-0.0449802	-0.0471183	0.138991	0.139911	0.265198	0.0992414	0.182931	-0.222018	0.109948	0.195055	0.14844	-0.0986497	-0.20884	0.304555	0.261109	0.149089	-0.156443	0.123113	0.0628984	0.239445	-0.0986497	-0.120262	-0.143894	-0.405067	0.28445
P605	-0.0522865	0.0479663	0.0629701	-0.0372012	0.265941	0.0539234	0.154102	0.0720533	0.120156	-0.135063	0.0815407	0.269616	-0.0011765	0.101726	-0.030406	0.235358	0.0768746	-0.0996586	-0.167526	0.0948921	-0.00811567	0.0995867	0.0715638	-0.178433	-0.0747552	-0.410628	0.312112
P606	0.530844	-0.236797	0.248293	-0.116417	0.4511	0.373545	0.720722	0.419397	0.157552	-0.359356	0.213916	0.436542	0.163328	-0.206531	-0.113427	0.25222	0.645383	-0.138256	-0.25188	0.376518	0.201482	0.496668	0.34557	-0.10293	-0.24853	-0.677516	0.461872
P607	0.192192	-0.0647458	0.230638	0.0531164	0.127215	-0.0251781	0.183005	0.210153	0.145327	-0.22291	0.24078	0.176213	0.375835	-0.112428	-0.191158	-0.0257483	0.12327	0.106657	0.12198	0.0180281	0.0973172	0.139349	0.0662303	-0.0641353	-0.0141598	-0.414827	0.164287
P608	-0.0956547	0.0610218	-0.00330381	0.0693795	-0.115897	-0.270084	-0.23355	-0.145304	-0.163784	0.0188312	0.015093	-0.0683709	0.0045107	-0.0852423	-0.0957431	0.136364	-0.0140713	0.189248	-0.0442297	-0.209239	-0.0810858	-0.153189	0.0639776	-0.0526667	-0.179798	0.143848	0.0647787
P609	0.534137	-0.132272	0.150706	-0.0235684	0.271803	0.371609	0.463695	0.332675	0.258152	-0.319366	0.260981	0.277675	0.0667634	-0.131978	-0.169951	0.0580009	0.502293	-0.112907	-0.102035	0.0337214	0.147239	0.169647	0.232762	0.0335851	-0.0301736	-0.590562	0.383817
P610	-0.0866947	0.215347	0.0706863	0.0364537	0.0384118	-0.15854	-0.272222	-0.206937	-0.11954	0.235354	-0.226542	-0.11677	-0.202205	0.164985	0.197475	-0.0918233	-0.221647	0.17249	0.015823	-0.0969325	0.00618727	-0.221602	0.155178	-0.0146557	-0.0106061	0.0615961	-0.0701769
P611	0.60848	-0.141406	0.040954	-0.0110664	0.283369	0.341696	0.574669	0.384798	0.166851	-0.180231	0.239617	0.456433	0.173694	0.00569301	-0.128736	0.103625	0.593927	0.121331	-0.297931	0.382273	0.108282	0.338855	0.20029	0.0348949	-0.202719	-0.611893	0.427271
P612	0.478689	-0.407912	0.0739254	-0.0356653	0.262675	0.303816	0.584283	0.352105	0.131209	-0.33781	0.223568	0.399554	0.256616	-0.187869	-0.311493	0.369477	0.566144	-0.0433958	-0.0967308	0.304514	0.0916106	0.432365	0.275542	-0.091436	-0.212822	-0.612314	0.375599
P613	0.373083	-0.239432	0.332896	-0.155421	0.325067	0.257004	0.514295	0.289662	0.154286	-0.32455	0.088754	0.279131	0.194835	0.106717	-0.162753	0.228865	0.500483	-0.0949748	-0.176547	0.316383	0.0763886	0.295551	0.279387	-0.250498	-0.160762	-0.496621	0.344236
P614	0.200993	-0.197603	0.0205416	-0.159891	0.119206	0.29442	0.56791	0.12338	0.115978	-0.142993	0.297042	0.223356	0.0167682	-0.0818494	-0.359083	-0.114966	0.289735	-0.122772	-0.143286	0.265699	0.080483	0.317709	-0.212808	-0.0755661	-0.399224	-0.481232	0.315843
P615	0.598819	-0.362691	0.16106	-0.065347	0.231055	0.366786	0.518018	0.318123	-0.0335415	-0.253238	0.217597	0.424704	0.134483	-0.144585	-0.372385	0.204951	0.730393	0.0267541	-0.22929	0.143202	0.0630952	0.415682	0.410097	0.0385596	-0.0907279	-0.623473	0.418483
P616	0.29089	0.0125362	0.134021	-0.0085272	0.202335	0.188679	0.256622	0.156664	-0.0661331	-0.133075	0.367753	0.293951	0.306555	0.0871634	-0.110639	0.108994	0.263847	0.263463	-0.047233	0.120902	0.0794515	0.301292	-0.0585645	0.164219	0.038647	-0.358702	0.0983126
P617	0.218109	-0.0408374	0.105653	0.0757686	-0.00987909	0.310213	0.174111	0.0330192	0.0303974	-0.0424273	-0.227954	-0.0999395	-0.172084	0.0721404	-0.143661	-0.10566	0.0361006	0.00528364	0.0703365	0.00202108	0.171555	0.00496787	0.242087	-0.0917673	0.198427	-0.0957568	0.208599
P618	0.172628	0.0226787	-0.157334	-0.0576971	0.258767	0.169553	0.00122699	0.00159041	0.0826872	0.0447492	0.203811	0.0564373	0.0576616	0.0694105	0.0620715	0.227086	0.160913	0.136919	-0.237992	0.0351625	0.0464394	0.0669029	0.0253985	0.207132	-0.0116204	-0.30052	0.294107
P619	0.273094	-0.0895662	0.0126831	-0.175734	0.234145	0.109158	0.356658	0.151096	0.132494	-0.033201	0.29343	0.246312	0.255606	0.0771123	-0.15828	0.184424	0.215973	-0.226581	0.0422846	0.282862	-0.0155663	0.23736	0.202653	0.0368111	-0.154463	-0.320933	0.180172
P620	0.563028	-0.184144	0.169037	0.0130916	0.334571	0.304598	0.544714	0.327409	0.0374033	-0.244633	0.328187	0.358565	0.237866	-0.163191	-0.17889	0.16775	0.606574	-0.0876907	-0.258795	0.276825	0.0249876	0.372804	0.322097	0.0869046	-0.080535	-0.635013	0.440018
P621	0.460479	-0.0214664	0.0965926	-0.0762885	0.288708	0.236052	0.532408	0.290656	0.373826	-0.146548	0.241919	0.300571	0.27066	-0.0639633	-0.0331468	0.0627057	0.34706	0.0511923	-0.119648	0.180141	0.0542301	0.212701	0.20352	-0.130324	-0.058703	-0.516904	0.327478
P622	0.687167	-0.365416	0.250658	-0.0621286	0.298464	0.45566	0.553074	0.26514	0.100921	-0.467162	0.0981099	0.230436	0.0834169	-0.175521	-0.325816	0.179083	0.75074	0.0199757	0.0165564	0.234712	0.178344	0.392159	0.354234	-0.037244	0.0185893	-0.540566	0.450103
P623	0.0747039	0.293119	0.0363428	-0.0540041	0.122545	-0.148132	0.111442	-0.0435013	0.0544386	-0.0814536	0.220406	0.174598	0.219428	-0.0272831	-0.0461544	0.17255	0.0977563	0.087611	0.0358721	0.00828111	0.0948564	-0.0619129	0.133142	-0.00121125	-0.172513	-0.175316	0.105612
P624	0.0962933	-0.216859	0.259642	-0.149347	0.260325	0.094224	0.311605	0.192961	-0.106627	-0.0682251	0.26897	0.290722	0.102307	-0.305575	-0.0535013	0.333048	0.266427	-0.0879844	0.11454	0.113895	0.12644	0.357565	0.0466697	0.0278616	-0.0665487	-0.424897	0.154407
P625	0.402969	-0.15002	0.0337064	-0.115614	0.374113	0.372878	0.623245	0.160526	0.252599	-0.129874	0.289002	0.169612	0.0694282	0.0175521	-0.203227	0.165564	0.390767	-0.0538912	-0.146477	0.444211	0.174607	0.376771	-0.175521	0.0644335	-0.305803	-0.565535	0.321009
P626	0.375396	-0.210285	0.00511056	-0.0320731	0.0271401	0.326158	0.307674	0.157803	0.0988515	-0.236755	0.0678503	0.23016	-0.0183762	-0.0838294	-0.13704	-0.13294	0.432549	-0.0493418	-0.13294	0.0956161	0.206977	0.132814	0.205763	-0.146464	-0.0219958	-0.375111	0.101504
P627	-0.0847879	-0.06868	-0.128588	-0.00857054	-0.110648	-0.0323579	-0.0837243	0.252949	-0.251051	0.0715987	-0.131698	0.116812	0.206309	0.126809	-0.045471	0.287223	-0.121352	0.101987	0.0193808	0.207004	0.0608816	0.18708	0.103336	0.107466	-0.0648863	0.0372246	-0.00918396
P628	0.410884	-0.349041	-0.00391027	-0.159358	0.355478	0.30549	0.612092	0.480901	0.215082	-0.236204	0.155808	0.320616	0.151609	-0.167552	-0.164713	0.329658	0.474462	-0.0659344	-0.291613	0.0844104	0.120296	0.201067	0.311018	-0.229379	-0.0508078	-0.394661	0.336102
P629	0.230786	-0.210285	0.136565	-0.00103461	0.217935	0.150349	0.356865	0.159852	-0.0515805	-0.222624	0.244533	0.0634319	0.23404	-0.0838294	-0.179699	0.0256672	0.352514	-0.0373686	0.0441983	0.314053	0.0286131	0.186803	-0.0838294	0.199421	-0.196629	-0.375111	0.262174
P630	-0.272619	0.20773	-0.0368967	0.0123833	0.0817619	-0.151302	-0.118815	0.141194	-0.0307257	0.167456	0.109726	-0.0114765	0.0922949	-0.11906	0.127077	-0.0864918	-0.298661	0.0913965	-0.188811	0.0816663	0.285729	-0.176136	-0.11906	-0.000568357	0.0719809	-0.0300736	0.0482792
P631	-0.107344	0.189791	-0.169866	0.068195	0.0997613	-0.0176504	0.085447	0.0504336	0.124101	0.161573	0.113664	-0.102092	-0.0403802	0.177904	0.281451	-0.255237	-0.156701	-0.0299908	-0.0801086	0.00697557	-0.0144227	-0.32283	-0.334052	0.197773	-0.185201	-0.0293138	-0.0175801
P632	0.28818	-0.180182	-0.0804248	-0.0894944	0.24934	0.124548	0.284555	0.104814	0.219857	-0.167922	0.336715	0.334437	0.226428	-0.0246296	-0.251509	0.517134	0.441804	0.0319879	-0.0842297	0.307579	0.00994369	0.303235	-0.0116431	0.121535	-0.284379	-0.368748	0.222092
P633	0.241245	0.0105412	-0.137593	-0.0498872	0.0167624	0.373483	0.377365	0.281278	0.174748	0.0586451	0.238755	0.193135	0.207591	-0.175336	-0.0845732	0.127024	0.178187	-0.0187993	0.0121599	-0.038292	0.117858	0.0235464	0.0246811	0.173698	-0.146324	-0.0749829	0.174057
P634	0.0843275	-0.183722	-0.127936	-0.160049	0.142604	-0.162831	0.0948842	0.167832	0.164452	0.135435	0.0747359	-0.0454138	0.100795	-0.106515	0.14128	0.00404949	0.0163258	-0.156404	0.0439214	0.0811318	0.00379948	0.0160725	-0.139789	0.211765	0.00353561	0.0278545	-0.00429685
P635	0.271018	-0.264993	0.310378	0.0930465	0.328243	0.241136	0.424565	0.270307	0.00265882	-0.316996	0.101947	0.252928	0.0514789	-0.105638	-0.217434	0.220177	0.336728	-0.0612495	0.000580176	0.253923	0.0918278	0.22429	0.262994	-0.109766	-0.156734	-0.4727	0.455499
P636	0.435097	0.144509	0.155376	-0.0881939	0.444362	0.297808	0.536217	0.133158	0.326862	-0.0664605	0.395753	0.331674	0.298562	0.128549	-0.0584698	0.137387	0.453603	-0.0836452	-0.163723	0.412127	0.163912	0.454544	0.0119081	0.0958712	-0.154665	-0.502119	0.17234
P637	0.245699	-0.2113	0.0651543	0.112329	0.0551573	0.0724889	-0.0968975	0.0488782	-0.107659	-0.0599567	0.119679	0.018587	0.0483606	0.27415	-0.150072	-0.0877741	0.0979935	0.287112	-0.157233	0.16947	-0.0847403	0.0261525	-0.0902835	0.077502	0.258225	-0.117823	-0.0173698
P638	-0.110809	-0.151926	0.202223	-0.0465704	-0.0112582	-0.016735	0.0808301	0.0888711	-0.00368476	-0.287082	-0.204026	0.0432663	-0.131196	-0.0986497	-0.197545	0.29846	0.113157	-0.05452	0.0233648	0.0296602	-0.0177012	0.254395	0.146928	-0.0880039	0.0152954	-0.182165	0.0773106
P639	0.0813839	-0.116969	0.166772	-0.085461	0.197688	0.132377	0.275175	0.0554017	0.126751	-0.255822	0.162362	-0.0395534	0.191968	-0.0466293	-0.100549	-0.0739467	0.109313	-0.146986	0.221648	0.201616	0.300541	-0.00630654	-0.0466293	-0.0405122	-0.156607	-0.208652	0.0387224
P640	0.0349584	-0.0169532	-0.129685	0.0482525	-0.0435515	-0.00555695	-0.012819	0.101492	0.083207	0.0347716	0.0804153	0.188916	-0.010921	-0.0671761	-0.0190683	-0.106531	-0.00582126	0.0855267	-0.106531	-0.0902465	-0.033188	-0.0659506	-0.0671761	-0.0554773	-0.0352523	0.0963055	0.0614941
P641	0.390304	-0.290609	-0.0401994	-0.0990379	0.0698588	0.255796	0.396133	0.315699	-0.116937	-0.201838	0.171851	0.114923	0.155406	-0.114938	-0.0881906	-0.0230439	0.470004	-0.0698485	-0.113591	0.0053688	0.0508285	0.126339	0.205829	0.0412929	-0.104726	-0.456989	0.182703
P642	-0.34533	-0.081625	0.216928	0.35717	-0.44036	-0.184017	-0.65168	-0.400408	-0.486731	-0.152622	-0.0697618	-0.388513	-0.0834183	-0.150815	-0.0757265	0.0608018	-0.378318	0.209558	0.352309	-0.255692	0.0166429	-0.120063	-0.150815	0.214364	0.338611	0.515156	-0.4578
P643	0.747352	-0.285943	0.143629	-0.106867	0.297244	0.428919	0.565454	0.342171	0.191724	-0.399206	0.201325	0.345788	0.11764	-0.157014	-0.17224	0.168497	0.791917	-0.0554809	-0.248999	0.143872	0.0913494	0.306425	0.36004	-0.0242717	-0.0122053	-0.627832	0.456294
P644	-0.012163	-0.0367442	-0.192826	-0.0777999	0.0565308	-0.170188	-0.0828302	0.125107	0.140496	0.253197	0.401823	0.185665	0.198603	0.115091	0.217429	-0.00558724	-0.170073	0.329409	0.1729	0.148536	0.170109	-0.054977	-0.0986497	0.20544	-0.121892	0.0279084	-0.00790472
P645	0.468393	-0.184813	0.149056	0.0176389	0.0561488	0.210069	0.115007	-0.0121271	-0.166554	-0.292136	0.0922839	0.0680065	-0.253597	0.0460125	-0.0318903	-0.211493	0.398458	-0.113673	-0.109702	-0.0493685	-0.150231	0.194829	0.243995	0.114141	0.113709	-0.328674	0.0312509
P646	0.262368	-0.12575	0.0346331	-0.218484	0.423876	0.116891	0.492519	0.315778	0.26887	-0.100548	0.179916	0.47375	0.0575964	-0.0340364	-0.102755	0.24423	0.387885	-0.0360588	-0.223471	0.0481038	-0.0562492	0.233186	0.252715	-0.234967	-0.100045	-0.626416	0.482974
P647	0.135589	0.0452091	0.0941448	-0.0304128	0.363013	0.0923446	0.30285	0.105014	0.227391	-0.0907424	0.201958	0.14035	0.184583	0.0241765	-0.0275947	0.379492	0.100122	0.113424	0.112107	0.253028	0.22094	0.28303	-0.0175829	0.155719	-0.257003	-0.310108	0.144589
P648	0.664393	-0.345041	0.102633	-0.132526	0.166196	0.427513	0.543598	0.361583	0.149407	-0.356124	0.131364	0.370452	0.104107	-0.18169	-0.256486	0.128617	0.741932	-0.00356553	-0.100534	0.19072	0.154666	0.409575	0.303813	-0.0197834	0.0448251	-0.557298	0.51073
P649	0.105488	-0.233285	0.158202	0.216878	0.051945	0.0510586	-0.0803406	-0.0100568	-0.233435	-0.203575	0.0418278	0.22538	-0.189009	-0.16068	-0.0685799	-0.0710802	0.177734	-0.120547	0.0392156	-0.154712	-0.0993962	0.276213	0.289371	-0.138113	0.14304	-0.110741	-0.0128531
P650	-0.283041	0.36259	0.00507097	0.107177	0.0772276	-0.203759	-0.352886	-0.227199	-0.163347	0.106133	-0.0600047	-0.156203	0.0562728	0.205223	-0.0505051	0.0404919	-0.245697	0.174967	0.0631674	0.0691447	-0.251688	-0.168055	-0.201282	0.143778	-0.106494	0.11663	-0.00293781
P651	0.124085	0.107972	-0.180788	0.0413813	0.00954787	0.28448	0.141342	-0.0326471	-0.0425678	0.13153	0.0731514	0.210579	-0.0343109	0.145737	0.00822511	-0.233358	0.105581	-0.109875	-0.170378	-0.0433778	-0.159024	-0.124809	-0.0505038	0.0727371	-0.00923521	0.0609622	-0.159046
P652	0.0668857	0.187526	0.0245865	0.093066	0.0210788	0.0182038	0.0391053	-0.157837	-0.104816	-0.112554	0.110021	0.0841881	-0.326434	0.0702103	-0.0547619	-0.0865905	0.188262	-0.154577	-0.00853446	-0.00743414	-0.0831121	0.162321	-0.139687	0.192077	-0.216017	-0.0200597	0.0112004
P653	0.491027	-0.264993	0.206323	-0.0474576	0.1557	0.258022	0.308484	0.335503	-0.0580416	-0.242128	0.0294983	0.351248	0.0371888	-0.105638	-0.12224	0.122659	0.490798	0.0358464	-0.167526	0.171635	0.00831224	0.271121	0.586596	-0.0691712	-0.015567	-0.4727	0.443586
P654	-0.191949	-0.0755326	0.00269724	0.0167608	0.239105	-0.0952746	0.13784	0.245243	0.191373	-0.0610549	0.0688002	0.0463282	0.338422	-0.0838294	0.0287945	0.20246	-0.0550564	0.15344	0.0310769	0.0938825	0.189595	-0.0139023	-0.0838294	-0.224632	-0.204094	-0.327576	0.296235
P655	0.33555	-0.245684	0.297877	0.126534	0.26799	0.289404	0.432509	0.275396	0.203888	-0.394791	0.153821	0.184255	0.111549	-0.169358	-0.180173	0.241589	0.310052	-0.0342036	-0.0178805	0.153439	0.205343	0.293356	0.166333	-0.0847609	-0.13446	-0.586899	0.406509
P656	0.378394	-0.320204	0.226447	0.0596743	0.0861185	0.282447	0.40652	0.179824	0.0936583	-0.23287	0.094865	0.206057	-0.105266	-0.157014	-0.147389	0.119458	0.379516	-0.0605728	-0.107589	0.122317	0.0470226	0.253715	0.219483	0.00185179	0.0377175	-0.403063	0.353445
P657	0.153729	-0.18022	-0.141083	-0.095092	0.171131	-0.0745738	0.388005	0.238012	0.199396	0.0426234	0.105303	0.448289	-0.0599345	-0.158537	-0.214142	0.147143	0.272827	-0.0114378	-0.0356634	0.0880615	-0.0998988	0.139367	0.0335867	0.00751144	-0.0512652	-0.255959	0.31822
P658	0.225362	-0.0428586	-0.109412	-0.170764	0.116119	0.274331	0.255777	0.291906	0.232888	-0.106315	-0.0754479	0.153509	0.0542218	0.106142	0.0866538	-0.104004	0.273706	0.0243736	-0.221277	0.0437756	-0.0640991	0.0656746	0.112467	-0.0960942	-0.0449142	-0.344974	0.1495
P659	-0.338089	0.218584	-0.123025	0.0865064	-0.12178	-0.181515	-0.198328	-0.151489	0.157907	0.364212	-0.0616277	-0.22769	0.0772504	0	0.225499	-0.0660697	-0.486811	0.0101323	-0.105413	-0.138763	-0.16965	-0.20154	-0.194066	-0.11264	0.103532	0.271988	-0.218934
P660	0.515238	-0.0463118	0.0853935	-0.064988	0.248319	0.375987	0.463573	0.198103	0.193833	-0.207349	0.286756	0.270562	0.0701718	-0.163191	-0.119721	0.124207	0.603486	-0.0912042	-0.149003	0.0880926	-0.0112791	0.230129	0.170664	0.246562	-0.101728	-0.405818	0.371554
P661	-0.306199	0.073777	-0.0719713	0.0173157	-0.0598018	-0.155569	-0.168636	0.0519316	-0.0174903	0.181965	-0.15286	-0.057374	0.0275434	-0.106472	-0.00789575	-0.123962	-0.262744	0.0892622	-0.0691737	-0.0601453	0.0344383	-0.382742	-0.124233	-0.0853498	0.218039	0.25463	0.0348414
P662	0.532507	-0.0439615	0.190199	-0.100405	0.176954	0.29653	0.42029	0.175796	0.165917	-0.110704	0.257432	0.0371715	0.199379	0.291086	-0.0993335	-0.178293	0.32578	-0.0752981	-0.0304719	0.160965	0.264354	-0.0235145	0.128372	-0.0264591	-0.0487013	-0.353127	0.118206
P663	-0.0972239	0.189464	-0.150206	0.122468	-0.0336997	0.178163	0.0668718	0.131408	0.237509	0.246849	0.148667	0.321799	0.125273	0.0254253	0.0906314	0.0730841	-0.0879564	-0.110041	-0.136973	0.17714	-0.146777	0.191522	-0.111964	0.097652	0.0950748	0.0997839	-0.0787634
P664	0.418798	-0.174577	-0.056003	-0.136217	0.13416	0.25892	0.431078	0.110674	0.343969	-0.148464	0.138149	0.348536	-0.0194977	0.0806401	-0.215972	0.157492	0.430164	-0.185469	-0.0959525	0.176028	-0.053616	0.192066	0.146109	0.106452	-0.0689769	-0.380288	0.164168
P665	0.188329	-0.15838	-0.134773	-0.343503	0.0769457	0.226694	0.203123	-0.0389386	0.345717	0.148759	0.0111707	0.184492	-0.112524	0.15922	0.117715	0.047873	0.183825	0.121943	-0.141375	-0.079805	-0.0320783	-0.0189689	0.232226	-0.231226	0.166664	-0.127598	0.205795
P666	-0.0748081	-0.0819542	0.127803	-0.0598782	0.209431	0.017234	0.0771517	-0.0175715	-0.0692827	-0.0942965	0.00872629	0.0952637	0.131787	-0.0326708	-0.222883	0.34047	0.262253	0.26482	-0.0518107	0.051453	0.0945784	0.0694362	-0.0326708	-0.00857783	-0.111441	-0.146192	0.23561
P667	0.573791	-0.299986	0.272148	-0.121073	0.246127	0.370605	0.590253	0.255743	0.0685216	-0.388031	0.274426	0.445983	0.108648	-0.175521	-0.376225	0.175035	0.695663	-0.121579	-0.00122907	0.28472	0.0381297	0.393855	0.276047	-0.0254298	-0.183549	-0.689858	0.455346
P668	0.0988042	-0.0104341	-0.0247784	0.0424702	0.120358	0.0815953	0.356829	0.188448	0.0957883	0.146203	0.163949	0.315619	0.0905731	0.0395732	-0.0197817	0.178062	0.061252	0.0445296	-0.0584378	0.29236	0.16458	0.282246	-0.0750061	0.11065	-0.413673	-0.318161	0.0907314
P669	0.691745	-0.393866	0.224242	0.015936	0.145101	0.354975	0.475346	0.273823	0.0322284	-0.436042	0.0832928	0.393062	0.0282922	-0.157014	-0.258647	0.140839	0.834772	0.121171	-0.121056	0.187906	0.0606123	0.392372	0.342351	0.0892168	-0.0405815	-0.62576	0.422676
P670	-0.0855516	-0.0778118	-0.0388783	-0.0293096	-0.190466	-0.168174	-0.109694	-0.022399	-0.0667451	0.19142	-0.0489697	0.105066	-0.119633	0.33998	0.0279677	-0.0832879	-0.137692	0.0696035	0.0464879	0.103451	-0.100195	-0.184528	-0.175521	0.134606	-0.0591174	0.206369	-0.259211
P671	0.05948	0.0218084	-0.181589	-0.115151	0.315548	0.177993	0.237637	0.0283547	0.129417	0.0646643	0.226549	0.0877065	0.16665	0.0724488	-0.303715	0.400672	0.110664	0.0485331	0.00634824	0.179824	0.0641958	0.22858	-0.138311	0.0469254	-0.177214	-0.221207	0.208414
P672	0.257808	-0.193959	0.191444	-0.0927651	0.210388	0.114648	0.434789	0.265892	0.204483	-0.0852792	0.167365	0.283899	0.141663	-0.251328	-0.102515	-0.0348098	0.307584	-0.00188629	-0.1098	0.124442	0.213234	0.121626	0.0678775	-0.309801	0.0484847	-0.430831	0.310128
P673	-0.470896	0.211583	-0.0734972	0.139293	-0.216643	-0.305076	-0.438985	-0.238204	-0.182755	0.154447	-0.339001	-0.332351	-0.147654	0.0317015	-0.0386679	-0.00543499	-0.385483	0.174653	-0.0383684	-0.193184	-0.140252	-0.322579	-0.251328	-0.0140222	0.0260034	0.641619	-0.217597
P674	0.251835	-0.144585	-0.0530008	-0.105638	-0.124607	0.17174	0.297615	0.107185	0.122878	-0.15197	-0.119662	0.106766	-0.113667	-0.0576386	0.0792845	-0.0914056	0.261189	-0.0230717	-0.0914056	0.147623	0.0604915	0.0209737	-0.0576386	0.00816275	-0.0473874	-0.197995	0.181476
P675	0.420484	-0.210142	0.106544	-0.139019	0.308219	0.317222	0.592522	0.205766	0.279531	-0.167107	0.244385	0.168204	0.159089	0.0281535	0.0355117	0.203398	0.390455	-0.124315	-0.20409	0.250999	0.190179	0.347292	0.124147	-0.0753048	-0.221309	-0.512292	0.310024
P676	0.276961	-0.190168	-0.0429044	0.0366022	0.0516524	0.164468	0.191827	0.225884	0.0314953	-0.107125	0.211469	0.166245	0.0915917	-0.0758099	-0.0550454	-0.120222	0.207179	0.0970776	-0.120222	0.162663	0.147493	-0.0101799	-0.0758099	0.113417	-0.0940329	-0.339226	0.271405
P677	0.365255	-0.134004	0.21797	-0.0467297	0.269121	0.382841	0.409666	0.189691	0.0644278	-0.208694	0.536654	0.311939	0.16093	-0.19712	-0.26638	0.0491657	0.419568	-0.0185603	0.155574	0.257192	0.218923	0.565463	0.116574	0.121685	-0.0944356	-0.480582	0.417587
P678	0.518788	-0.117788	0.209777	0.14096	0.237083	0.257524	0.447649	0.225927	0.127902	-0.261328	0.123648	0.406872	-0.0534114	-0.0608947	-0.0618683	0.0884111	0.564071	-0.0915129	-0.183766	0.166475	-0.0715969	0.475414	0.340181	-0.053422	0.0359903	-0.589411	0.327863
P679	0.159925	0.00147151	0.135149	0.015399	0.0535783	0.0720175	-0.0577201	-0.0584912	-0.224501	-0.106205	-0.203884	-0.0381944	-0.0825235	0.250594	0.0325397	-0.0366296	0.12609	0.13464	-0.244011	0.184771	0.0222525	-0.216306	0.157744	-0.177493	0.185786	-0.0425058	-0.044618
P680	-0.122703	0.162399	-0.10575	-0.285168	0.0786122	-0.0852952	0.04291	0.0513008	0.14587	0.107476	0.176893	0.104593	0.214321	0.0399382	-0.0435541	0.214231	-0.0513108	0.142613	0.0995043	0.0266976	0.0781634	0.0290389	-0.194066	0.0521006	-0.106671	-0.0403562	0.163494
P681	-0.0748081	-0.0819542	-0.127803	-0.0598782	-0.161436	-0.0430849	0.0685793	0.193287	0.0433017	0.120014	-0.161436	0.103924	0.114215	-0.0326708	0.042862	-0.0518107	-0.0819542	0.166739	-0.0518107	0.0771795	0.180559	-0.0433976	-0.0326708	-0.0857783	-0.0857241	-0.0443006	0.0959891
P682	0.0731398	-0.183239	0.017715	-8.55023e-05	0.231188	0.0756173	0.311591	0.25049	0.139196	0.0490247	0.0889686	0.357822	-0.0192888	-0.109259	-0.183613	0.0529503	0.154029	-0.0677093	-0.0985763	0.0774392	-0.0237385	0.301505	0.107393	-0.207926	0.0872162	-0.259043	0.414041
P683	0.444678	-0.325933	0.150949	-0.0256138	0.283137	0.278417	0.565586	0.189375	0.153975	-0.368803	0.198566	0.309464	0.231779	-0.157014	-0.354218	0.372147	0.660937	-0.179651	-0.138404	0.269187	-0.0187383	0.47504	0.155222	-0.0224199	-0.187574	-0.57448	0.314848
P684	0.436554	-0.284005	0.109651	-0.114592	0.165747	0.30349	0.352297	0.301658	0.152295	-0.213705	0.101825	0.303126	0.100271	-0.194066	-0.208955	0.10152	0.516546	0.135336	-0.307758	0.1233	0.258028	0.128362	0.244538	-0.213679	0.0225016	-0.405039	0.35901
P685	0.420113	-0.125596	0.0489024	-0.17291	0.29618	0.287036	0.567336	0.352117	0.0935469	-0.105632	0.130594	0.399915	0.221907	-0.178988	-0.151064	0.113517	0.420079	0.00351284	-0.162436	0.267717	0.212764	0.396148	0.29576	-0.218069	-0.0990013	-0.595819	0.396441
P686	-0.43507	0.115633	-0.0622571	0.153518	-0.394908	-0.335164	-0.627292	-0.451486	-0.215049	0.166251	-0.232688	-0.417465	-0.200863	-0.0973873	0.0488608	-0.1401	-0.506159	0.130768	0.0722729	-0.38944	-0.132323	-0.460825	-0.219121	0.0337825	0.277562	0.526215	-0.420762
P687	0.428264	-0.196878	0.0916673	-0.0790905	0.124832	0.198012	0.390376	0.127013	0.190338	-0.345159	0.115967	0.122578	0.151515	-0.175521	-0.15533	0.105628	0.409179	-0.0590169	-0.134114	0.168034	0.296303	0.20034	0.113078	-0.0273151	-0.0921093	-0.406031	0.241013
P688	0.385835	-0.129201	0.0681568	0.0105907	0.294801	0.231446	0.552477	0.291881	0.264127	-0.21133	0.349074	0.273683	0.221417	-0.194066	-0.150668	0.21371	0.478807	-0.138468	-0.21861	0.0856497	0.0474996	0.383802	0.122883	0.0284569	-0.187138	-0.622005	0.367042
P689	0.373048	-0.00393215	0.211653	-0.00303054	0.282096	0.296108	0.458577	0.191134	0.247025	-0.106522	0.16917	0.312904	0.0569079	-0.103676	-0.113629	0.247598	0.371862	-0.108698	-0.273828	0.173278	0.0768799	0.459444	0.319957	-0.0444253	-0.0755964	-0.400394	0.301215
P690	-0.256542	0.164803	-0.112355	0.16299	-0.0208409	-0.0850128	-0.227426	-0.131991	-0.138989	-0.128032	0.0129563	-0.0584548	0.0267329	0.157437	-0.024702	0.00715755	-0.306124	0.120333	0.173299	-0.0201038	0.0847839	-0.0515475	-0.175521	0.058652	-0.0944539	0.257085	-0.17231
P691	-0.131978	-0.144585	-0.0107368	0.0860758	-0.17849	-0.179156	-0.13263	0.102066	-0.0263906	-0.0645275	-0.124094	0.0173159	0.0488956	-0.0576386	0.0615028	-0.0914056	-0.144585	0.311049	0.165401	-0.0388772	0.0255113	0.0657979	-0.0576386	-0.055305	-0.0284141	-0.099424	-0.0215998
P692	0.159282	-0.062925	0.123158	-0.0255892	0.0493379	-0.21991	0.0063459	-0.207652	-0.127012	-0.206012	0.121589	0.100485	0.252542	-0.144585	-0.257101	0.272487	0.328195	-0.0511931	0.0282294	0.0455873	-0.186472	0.0947716	-0.144585	0.0816515	0.0901301	-0.235882	-0.0444463
P693	0.531254	-0.321327	0.193648	0.0809451	0.286479	0.351719	0.462039	0.32002	0.141778	-0.308525	0.146962	0.339022	0.138322	-0.157014	-0.158008	0.20152	0.597638	-0.169644	-0.100436	0.145459	0.168446	0.448004	0.377616	-0.0989607	-0.00180656	-0.429864	0.285447
P694	-0.373668	0.186625	-0.102712	0.364886	-0.326954	-0.116648	-0.554056	-0.286982	-0.273272	0.0132351	-0.178094	-0.383821	-0.218805	0.121102	0.000605526	-0.173651	-0.350591	0.147124	0.15931	-0.418656	-0.200117	-0.219443	-0.163191	0.230375	0.0895314	0.557989	-0.243476
P695	0.156151	-0.0495797	0.156138	0.0725267	0.203891	0.0102689	0.345828	0.360915	0.036714	0.0180869	0.184073	0.28889	0.248706	-0.175521	-0.0754459	0.0227017	0.144149	0.00991599	-0.00101218	0.325431	0.248137	0.313821	0.216264	-0.00167577	-0.0983057	-0.518021	0.27839
P696	0.415775	-0.163091	0.0198898	0.0148707	0.242434	0.243706	0.465208	0.471836	0.10805	-0.0662167	0.206252	0.542894	0.147879	-0.0504213	-0.116332	0.0356589	0.455974	-0.0939313	-0.1988	0.101797	0.087954	0.211077	0.354177	-0.129134	0.0660557	-0.57312	0.418589
P697	-0.0879586	0.00970747	-0.186167	-0.0318992	0.125859	-0.0842061	0.197051	0.273062	0.0113707	0.0105273	0.00775221	0.0913052	0.115325	-0.105638	-0.0191508	0.122659	-0.132336	-0.136178	-0.167526	0.173988	0.175175	0.0291418	-0.105638	-0.119292	-0.061484	-0.129236	0.055548
P698	-0.153817	0.0180766	0.137534	0.0824522	-0.165316	-0.0703075	-0.196932	-0.171288	0.0989095	0.213597	0.119481	-0.120925	-0.0789106	-0.0671761	0.18171	-0.106531	-0.16851	-0.118802	0.106531	-0.209507	0.101011	0.0802278	-0.0671761	0.0909123	0.283621	0.289496	-0.189865
P699	-0.37025	0.238569	-0.275406	-0.3156	-0.232544	-0.256884	-0.0728565	0.0622657	0.185578	0.503626	-0.0644378	-0.0113422	0.148605	0.116732	0.156781	0.126704	-0.3796	0.136609	-0.0694364	-0.0721659	-0.0176097	-0.362103	-0.200285	-0.00748944	-0.0455453	0.431812	-0.158339
P700	-0.560513	0.0673962	-0.150919	0.0441777	-0.347931	-0.302638	-0.55547	-0.299628	-0.0899313	0.0773024	-0.359282	-0.407564	-0.0986662	-0.0254124	0.079073	-0.0548393	-0.58354	0.0240942	0.306462	-0.23542	-0.188808	-0.324917	-0.244792	-0.10223	0.130269	0.677429	-0.327511
P701	0.13121	0.107096	-0.0600556	-0.184677	-0.122128	-0.0201963	0.128004	0.0747292	-0.00155242	0.109871	0.0439161	0.217882	0.294231	0.189749	-0.0952728	-0.0614295	0.198277	-0.015384	-0.220907	0.173936	0.0967521	0.0775985	0.0659826	-0.0435918	-0.197537	-0.216396	-0.0761395
P702	0.737172	-0.346952	0.186206	-0.0104616	0.281244	0.389434	0.461888	0.322191	0.0498051	-0.408818	0.223479	0.427962	0.149696	-0.138311	-0.292403	0.18825	0.819708	0.100302	-0.21934	0.140879	0.0896283	0.350935	0.442237	0.0313622	-0.0501478	-0.618901	0.430741
P703	-0.0441169	0.0696701	0.0823368	-0.15364	0.0482416	0.199125	0.286745	0.0304675	0.0684149	0.0159969	0.0960761	-0.081209	0.013321	-0.0838294	-0.0427918	-0.13294	-0.0984727	-0.264249	0.0376376	-0.0237373	-0.0839675	0.0310439	-0.0838294	-0.154801	-0.118777	-0.253174	0.0735498
P704	0.142316	-0.0411224	0.12802	0.347159	-0.0163462	-0.0303197	0.00108499	0.0848085	-0.13855	-0.00694396	0.246113	0.155357	0.11272	-0.0758099	-0.242315	0.0686985	0.0561053	0.0969949	0.27723	0.147178	-0.0524168	0.123807	-0.0758099	0.302688	0.0695843	-0.126831	0.0632493
P705	0.51961	-0.22888	0.108953	0.0545212	0.286561	0.333987	0.462744	0.291935	0.214972	-0.215213	0.141722	0.355279	0.225407	-0.169358	-0.259097	0.279479	0.606093	-0.0120661	-0.268575	0.0975422	-0.0886286	0.332278	0.32413	-0.242028	0.0225376	-0.559012	0.444667
P706	0.749886	-0.297897	0.136382	-0.0872508	0.239589	0.411067	0.546364	0.307864	0.11421	-0.414697	0.221736	0.422676	0.105771	-0.150815	-0.247775	0.0915521	0.895868	-0.0327226	-0.239169	0.151148	0.0397806	0.31557	0.320026	0.0286179	-0.0342658	-0.674853	0.476156
P707	-0.216304	0.0387034	-0.000644827	-0.0799595	-0.0445566	-0.156734	-0.00994793	-0.0877702	0.0183521	0.0497396	0.103202	0.0865171	0.102088	-0.163191	-0.265393	0.26126	-0.120411	0.0949158	0.133169	0.100294	0.0269397	0.0606962	-0.163191	-0.17844	-0.0186848	-0.103086	0.195618
P708	-0.430175	-0.0512552	-0.00364421	0.0837249	-0.405334	-0.384858	-0.555277	-0.442877	-0.218051	0.0532055	-0.388248	-0.305221	-0.349684	-0.0816688	-0.0787898	-0.177985	-0.471267	0.0495486	0.353296	-0.245421	-0.101458	-0.22699	-0.187869	-0.0895608	0.153913	0.535975	-0.271425
P709	0.760451	-0.280414	0.115407	-0.0848776	0.162594	0.409711	0.523251	0.324917	0.176266	-0.371618	0.229793	0.370977	0.034243	-0.150815	-0.134275	0.0284984	0.746548	-0.104136	-0.239169	0.153037	0.00288657	0.345301	0.388692	0.0100343	0.00404714	-0.674853	0.429282
P710	0.871871	-0.331065	0.294346	-0.0236436	0.257702	0.43933	0.562547	0.208629	-0.0119388	-0.440884	0.236823	0.391534	0.10764	-0.131978	-0.306337	0.137998	0.907165	-0.0138537	-0.209297	0.231883	0.104442	0.320071	0.415562	0.105166	0.0195668	-0.590562	0.434944
P711	0.0345998	0.067742	0.271072	0.208344	0.231979	0.20538	-0.0805338	-0.0678685	0.0331833	-0.0956657	-0.0594666	-0.0346165	-0.022685	-0.148565	0.116399	0.150594	0.154378	0.100446	-0.170035	-0.214325	-0.111348	0.095701	0.112383	0.0485364	0.151428	0.06786	-0.09281
P712	-0.196386	0.106627	-0.175946	0.0312856	-0.0858551	-0.173429	-0.18062	-0.038743	0.00367042	0.0473175	-0.186636	0.0138952	0.143358	-0.163191	0.0732687	0.114124	-0.181277	0.181419	-0.16775	-0.12262	-0.162679	-0.101116	0.0115388	-0.0909296	-0.1064	0.08668	-0.0380404
P713	-0.298298	0.244925	-0.107006	-0.211748	0.338202	-0.0493917	0.10227	0.237087	0.339384	0.344315	0.231196	0.0898292	0.155915	0.197341	0.38012	-0.0403504	-0.424831	-0.0854118	0.0959011	0.109581	0.262346	0.0834409	-0.169358	-0.0901436	-0.00420985	0.0170749	0.0891281
P714	0.156397	-0.00782166	0.0574492	0.0892988	0.290719	0.165252	0.300762	0.205168	0.230528	-0.0206197	0.130378	0.0273764	0.196517	0.14799	0.0776822	0.0486231	-0.0464138	0.118923	0.0297978	0.441085	0.398445	0.155603	-0.0914056	0.0185134	-0.231427	-0.138848	0.0586575
P715	0.741412	-0.346952	0.139027	-0.0622577	0.249675	0.399573	0.505626	0.287412	0.0833259	-0.417301	0.211772	0.413963	0.0819244	-0.138311	-0.298342	0.157811	0.85936	0.0198986	-0.21934	0.0916565	0.0700576	0.348359	0.353263	0.00919643	-0.0635331	-0.618901	0.413182
P716	-0.184308	0.300199	-0.169682	0.036925	-0.0574128	-0.220253	-0.298092	-0.228025	0.000524346	0.237453	-0.106504	0.0421224	-0.24682	0.187917	0.011505	-0.258795	-0.268553	0.0671042	0.0920908	-0.106525	-0.10251	-0.289686	-0.163191	0.00225052	-0.012543	0.256553	-0.103775
P717	-0.247794	0.376751	0.16879	-0.108123	-0.0965943	0.0636639	-0.208934	-0.366768	-0.116389	0.134988	-0.193753	-0.155123	-0.00869648	0.293562	0.147448	-0.184195	-0.257868	-0.099073	0.00434151	-0.00551095	0.0739444	-0.146502	-0.13471	-0.111636	0.0634455	0.241893	-0.311819
P718	-0.444363	0.36523	-0.0972628	0.158829	-0.174783	-0.290258	-0.42105	-0.165908	-0.131311	0.14777	-0.0847996	-0.102113	-0.198685	-0.0937857	0.0911738	-0.307758	-0.486811	0.0233965	0.198035	-0.365511	0.119385	-0.257356	-0.194066	-0.0115399	0.123296	0.440756	-0.127845
P719	-0.331065	0.0540445	-0.0279615	0.128874	-0.300802	-0.398588	-0.416944	-0.277851	-0.18183	-0.0869112	-0.333663	-0.251469	-0.233408	-0.144585	-0.0410184	-0.22929	-0.313423	0.0991242	0.160165	-0.421372	-0.193944	-0.409676	-0.144585	-0.212722	0.259952	0.383528	-0.171325
P720	-0.246228	0.134461	-0.0632878	-0.0822431	-0.312281	-0.0944157	-0.195521	-0.265364	-0.211881	0.1213	0.125783	-0.15321	0.107157	0.03261	-0.116035	-0.0891879	-0.202419	0.0982313	0.283242	-0.282155	0.129177	-0.131401	-0.219121	0.224565	0.0733687	0.383637	-0.278426
P721	-0.0491281	0.288366	-0.327927	-0.15364	0.0656791	-0.125425	-0.0243953	0.0491169	0.169825	0.391525	-0.0265973	0.237163	0.0222017	0.437268	0.26035	-0.13294	-0.210285	0.230846	-0.13294	0.252443	0.197952	-0.0894875	-0.0838294	0.00146731	-0.0661206	-0.0513237	-0.065747
P722	-0.516278	0.174233	-0.0465554	0.275017	-0.381949	-0.281782	-0.687193	-0.374748	-0.276952	0.0885115	-0.331658	-0.532635	-0.14182	0.0238162	0.067152	-0.125446	-0.519418	0.124259	0.238553	-0.340185	-0.107656	-0.309811	-0.225473	0.0339432	0.248862	0.737971	-0.491446
P723	-0.272619	-0.0879692	0.0382164	-0.0788684	0.210542	0.0192047	0.244136	0.138998	0.0128328	-0.075802	0.0256771	-0.0300475	0.143417	-0.11906	-0.0677984	0.184397	-0.188773	0.0715162	0.0798488	0.232499	0.18888	0.225229	-0.11906	-0.209285	-0.320196	-0.17417	0.203656
P724	0.429772	-0.0847142	0.0752297	0.00880997	0.12598	0.224567	0.331728	0.12028	0.159371	-0.12555	0.134852	0.166609	0.254483	-0.194066	-0.069437	0.256216	0.467211	0.0695677	-0.195394	0.282318	0.188929	0.174722	0.193248	0.0272083	0.0634795	-0.288547	0.282365
P725	-0.279566	0.00626342	-0.0440921	0.0203295	0.0298273	-0.0287636	-0.0570129	0.148487	-0.0338359	-0.102392	0.173336	-0.133409	0.131027	-0.241749	0.0143435	0.179121	-0.281232	0.0408627	-0.0399607	0.0136259	0.107862	-0.0827103	-0.231881	0.0327724	-0.183359	0.0751889	0.142792
P726	-0.0147702	-0.069174	0.0507098	0.095703	0.28746	-0.0594883	0.0204856	0.0647638	-0.173888	-0.25038	-0.136779	0.11494	-0.204271	-0.0763756	-0.147337	0.211939	0.140996	-0.0397879	-0.0216181	-0.266554	-0.139063	0.00111573	0.11438	-0.166049	0.0772456	-0.02754	0.112487
P727	-0.018338	-0.0447386	-0.291566	-0.00103903	-0.174162	0.0581936	-0.00354592	-0.142326	0.0732542	-0.0243511	0.205212	-0.208321	0.170899	-0.153205	0.0921216	0.247052	-0.079607	-0.00678941	0.0903483	-0.0324316	0.0206496	-0.0631954	-0.256032	0.193266	0.0276437	0.118624	-0.104199
P728	-0.302198	0.187434	-0.286816	-0.0983332	-0.200068	-0.190259	-0.0800109	0.094263	0.112342	0.47871	0.047897	-0.0481956	-0.0261842	-0.131978	0.182543	-0.0686643	-0.276644	0.126234	-0.109562	-0.23634	-0.0837477	-0.271106	-0.131978	0.0237228	0.158327	0.406348	0.0209781
P729	-0.322935	0.254581	-0.230534	-0.135147	-0.0604718	-0.163683	-0.352424	-0.297547	0.108616	0.255771	-0.196849	-0.296171	-0.114708	0.0349096	0.310803	-0.00962894	-0.473437	-0.0320247	-0.0616756	-0.185062	-0.143913	-0.153395	-0.305575	-0.0613393	0.00743479	0.491043	-0.387798
P730	0.38873	-0.288674	0.129766	-0.0114491	0.265178	0.175433	0.537292	0.311634	0.158657	-0.202916	0.213323	0.347199	0.185957	-0.225473	-0.269837	0.198352	0.511877	0.112655	-0.106606	0.23919	0.129735	0.41207	0.157441	-0.106865	-0.193926	-0.759134	0.389926
P731	0.327328	-0.116969	0.0900189	0.189568	0.093749	0.235014	0.215113	0.166205	-0.0734885	-0.201766	0.223503	0.245636	0.155033	-0.0466293	-0.286743	-0.0739467	0.296889	-0.00610852	-0.0739467	0.249683	0.131863	0.0545065	-0.0466293	0.19388	0.0115676	-0.208652	0.197688
P732	-0.545662	0.160859	-0.0862803	0.0422937	-0.300509	-0.333276	-0.574125	-0.255018	-0.174349	0.261634	-0.380748	-0.225037	-0.207324	0.0974405	0.155222	-0.318234	-0.530448	0.0721059	0.0634766	-0.391076	-0.0882196	-0.442478	-0.238306	-0.130596	0.124905	0.610901	-0.258422
P733	-0.139715	0.0691501	-0.119453	-0.160436	0.0272992	0.0963637	0.165337	0.0829871	0.0583758	0.00876644	0.0288344	-0.0379966	0.126896	-0.138311	-0.106328	0.0734931	-0.155242	-0.140099	-0.0769928	0.117871	0.178973	0.228819	-0.138311	0.00188645	-0.0573118	0.0077454	-0.0225974
P734	-0.373668	0.400321	-0.136795	0.199127	-0.252282	-0.198471	-0.358731	-0.229931	-0.24015	0.00787184	-0.232249	-0.246705	-0.168625	-0.0467046	0.00138406	-0.258795	-0.334768	0.0765067	0.157817	-0.344323	-0.0865454	-0.224917	-0.163191	0.138364	-0.0276812	0.391423	-0.251005
P735	-0.0951635	0.159253	-0.206786	0.121138	-0.0570674	-0.0582464	-0.0834845	-0.295134	-0.0869632	0.131716	0.106122	-0.00439892	-0.0120148	-0.0117014	-0.203896	0.0642011	-0.041521	0.0809566	-0.106423	-0.022198	-0.134588	-0.0199238	-0.175521	0.220196	-0.26628	0.155264	-0.0247193
P736	0.682754	-0.346952	0.229872	-0.0474797	0.230867	0.407532	0.532679	0.323157	-0.0271404	-0.316252	0.120279	0.465578	0.129601	-0.138311	-0.328883	0.161066	0.831123	0.0765205	-0.21934	0.230273	0.140682	0.324021	0.40248	0.0432468	-0.062779	-0.583048	0.483325
P737	-0.170399	-0.0182573	0.0833697	-0.0590245	0.0107972	-0.187056	-0.15232	-0.0334259	-0.120715	-0.0763403	-0.1588	-0.114373	0.0470329	-0.0978066	0.0322534	0.255305	-0.12288	0.0996461	0.0750713	-0.294283	-0.0447615	-0.153346	-0.0209913	-0.0153788	0.107728	0.18689	0.0432991
P738	0.639051	-0.242188	0.288288	-0.0890337	0.199672	0.33942	0.518575	0.182324	0.0885705	-0.365925	0.0780787	0.354536	-0.00587866	-0.175521	-0.194016	0.167299	0.750419	-0.0604061	-0.278349	0.0827607	-0.00860857	0.314118	0.3253	-0.0892349	-0.000669886	-0.57592	0.369723
P739	-0.516278	0.178297	-0.102193	0.0550392	-0.292748	-0.308505	-0.698334	-0.273364	-0.242022	0.276522	-0.157284	-0.327483	-0.0435067	0.0397262	0.110793	-0.15238	-0.521426	-0.0296692	0.158748	-0.291225	0.0146419	-0.320196	-0.225473	0.0199123	0.304258	0.572676	-0.384999
P740	0.0898431	-0.131822	0.12864	-0.0817729	0.27008	0.0995074	0.343664	0.31182	0.413735	0.0436138	0.165038	0.249604	0.105988	0.0634983	0.0701417	0.283202	0.113529	0.0874552	-0.246515	0.241537	0.21951	0.212106	0.017136	-0.119001	-0.125671	-0.218339	0.282056
P741	-0.408651	0.0595764	-0.0790542	0.0323815	-0.38735	-0.305759	-0.689638	-0.449509	-0.226085	0.147838	-0.173739	-0.378603	-0.109311	0.140302	0.0595827	-0.153271	-0.504249	0.0194106	0.204458	-0.252031	-0.0612941	-0.353828	-0.257915	0.0739098	0.323752	0.666712	-0.465917
P742	-0.438361	0.325389	-0.292901	0.105528	-0.291289	-0.372664	-0.635289	-0.43364	-0.0885908	0.302789	-0.21352	-0.284302	-0.219131	0.271909	0.161589	-0.210127	-0.548273	0.0635208	0.27151	-0.237391	-0.219428	-0.275378	-0.238306	0.036479	0.277323	0.70557	-0.496052
P743	-0.499914	0.138358	-0.107601	0.0796882	-0.219166	-0.246757	-0.49445	-0.238084	-0.179183	0.189465	-0.315637	-0.328964	-0.22085	0.0447057	0.0438769	-0.106921	-0.562232	-0.0261628	0.154484	-0.279027	-0.0876811	-0.361039	-0.264556	-0.0852463	0.144623	0.676444	-0.218599
P744	0.0126244	-0.035498	-0.186561	-0.138942	0.0449519	0.0289382	0.141122	0.232853	0.226532	-0.0511394	0.0171929	0.105155	0.135256	-0.0758099	0.0490417	0.0485886	0.118434	0.179093	-0.120222	-0.0728656	0.129138	-0.0634597	-0.0758099	-0.120149	-0.0715373	-0.293659	0.264263
P745	-0.359523	0.0660235	-0.0546176	0.20621	-0.421375	-0.505256	-0.375941	-0.224396	-0.282399	0.0359109	-0.146132	-0.107413	0.00257407	0.0631413	-0.144701	-0.0247667	-0.332842	0.135463	0.127372	-0.147442	-0.281628	-0.370712	-0.157014	0.052225	-0.26508	0.364877	-0.246783
P746	0.518996	-0.00892808	0.126197	-0.0260862	0.13102	0.237212	0.288979	-0.0135317	0.00845857	-0.181865	0.378166	0.304102	0.203388	0.0225004	-0.221434	0.167868	0.40728	0.0307885	-0.117855	0.273741	-0.0340552	0.22685	0.189873	0.309885	-0.12551	-0.318606	0.173185
P747	0.756356	-0.331065	0.230752	0.000263124	0.263027	0.426331	0.524769	0.216621	0.0336146	-0.409063	0.19075	0.414188	0.115235	-0.131978	-0.363391	0.193113	0.914512	0.0535305	-0.209297	0.216766	0.0656283	0.384997	0.379999	0.0870645	-0.0369058	-0.590562	0.398361
P748	-0.331065	0.40976	-0.0293816	0.0826563	-0.329052	-0.287212	-0.243857	-0.272454	-0.108058	-0.0246018	-0.300334	-0.434507	-0.1613	-0.144585	0.0462607	-0.0957656	-0.362691	0.137111	0.119111	-0.245969	0.0687682	-0.366306	-0.144585	-0.0451165	0.22882	0.476873	-0.243624
P749	0.0635845	0.0147205	0.0426507	0.0954008	0.0180956	0.0143473	0.235636	-0.0807663	0.00428216	-0.113839	0.276189	0.355506	0.215436	-0.163191	-0.253975	0.171634	0.211876	-0.0741808	-0.16312	0.187262	-0.173915	0.222115	-0.163191	0.146933	-0.433384	-0.188649	0.0252282
P750	-0.0383958	0.361331	-0.121387	-0.0174532	0.133162	-0.106678	0.0350358	-0.0316072	0.0331727	0.285094	0.243598	0.0583608	0.206011	0.022772	0.166461	-0.108409	-0.0219665	0.00550023	0.0334161	-0.00945493	-0.108813	0.123786	-0.187869	0.22486	0.113744	0.0272008	-0.124909
P751	0.206445	0.131503	-0.023286	-0.133586	0.00818823	-0.0125995	-0.0794231	-0.219668	-0.0489158	0.0527926	0.0973445	0.0912833	0.320397	0.0684559	-0.195629	0.00310172	0.202332	0.111513	-0.00377601	0.194372	-0.0892559	0.105086	-0.0544671	0.0468869	0.156269	-0.0567841	-0.0669368
P752	0.602721	-0.314986	0.278774	-0.0128629	0.253829	0.316235	0.423925	0.279657	0.0989486	-0.425023	0.239041	0.247523	0.173596	-0.125568	-0.0871612	0.105341	0.540694	0.010738	-0.0566361	0.34128	0.112056	0.343802	0.451665	0.0768762	-0.116814	-0.56188	0.340776
P753	0.591304	-0.298661	0.203124	-0.218211	0.0416563	0.323885	0.353553	0.0976135	0.0516963	-0.397031	0.139713	0.239598	-0.010452	-0.11906	-0.10823	0.0605888	0.659785	-0.0996086	-0.188811	0.183736	0.124349	0.18309	0.314148	0.0015759	0.0647518	-0.452037	0.380084
P754	-0.316699	0.0951039	0.0834165	0.305948	-0.232259	-0.287054	-0.698393	-0.508308	-0.475862	-0.245366	-0.435827	-0.29445	-0.311371	0.0267043	-0.142054	-0.21934	-0.280445	0.152016	0.20119	-0.14814	-0.0896283	-0.177233	-0.138311	-0.0302303	0.137058	0.321117	-0.384011
P755	0.169653	-0.19205	0.187001	0.144946	0.11624	-0.0531059	0.121539	0.183657	-0.0671905	-0.333615	0.136879	0.133839	0.161559	-0.112428	-0.172922	0.208857	0.208048	0.0251607	0.262855	0.295747	0.173385	0.199086	0.0825834	0.205662	-0.00643629	-0.23017	0.0749638
P756	-0.316699	0.344128	-0.0904431	0.162997	-0.279421	-0.501669	-0.249514	-0.154574	-0.114752	0.151952	0.0738852	-0.0300926	0.0280166	-0.138311	0.0280903	-0.0671449	-0.292761	0.0374783	0.18418	-0.241871	-0.284721	-0.157668	-0.138311	0.151859	0.0320494	0.404076	-0.329029
P757	-0.280671	0.396087	0.0328504	-0.0198932	-0.00338738	-0.206935	-0.202267	0.0246568	-0.0196255	0.157299	0.0998362	-0.0820456	-0.0051618	0.0308486	0.332046	-0.239169	-0.326557	0.09647	0.0571521	-0.154657	0.169812	-0.270039	-0.150815	0.181337	0.286718	0.272962	-0.138745
P758	-0.0345601	0.129278	-0.235205	-0.0586706	-0.00751908	-0.103969	-0.00084532	-0.0679061	0.0972735	0.288053	0.164272	0.183527	0.0607895	-0.0450008	0.139679	-0.0326004	0.00554157	-0.00465166	-0.142253	-0.0478785	0.0337524	-0.0785171	-0.0829446	0.133524	-0.122451	-0.0548345	0.0817879
P759	0.441081	-0.250059	0.0465209	-0.149252	0.18359	0.277227	0.41046	0.277874	0.24529	-0.385076	0.170483	0.202643	0.096073	-0.144585	-0.191572	0.259544	0.559525	-0.0765266	-0.22929	0.0373531	0.16295	0.249232	0.200784	-0.0690437	0.0256135	-0.511093	0.269369
P760	-0.302198	0.188514	-0.00613757	0.111489	-0.177438	-0.14732	-0.334138	-0.101386	-0.142825	0.0772018	-0.13208	-0.0888071	0.019756	-0.131978	0.0797203	-0.209297	-0.276644	0.119391	0.184499	-0.268657	-0.112044	-0.0873857	-0.131978	0.199621	-0.00532761	0.316694	-0.313463
P761	-0.359523	0.178525	-0.193648	-0.033103	-0.108927	-0.318943	-0.242432	-0.154106	-0.105455	0.113946	-0.0823733	-0.11044	0.0180411	-0.157014	-0.0764484	0.0304733	-0.275327	-0.00375587	0.342017	-0.00379074	-0.0840574	0.0670534	-0.157014	0.0546059	0.0301387	0.340922	-0.194484
P762	-0.331065	0.257855	0.123452	0.22552	-0.1783	-0.166799	-0.353163	-0.198532	-0.291142	-0.0469504	-0.104059	-0.127151	-0.0694214	-0.144585	-0.111421	-0.0883013	-0.189713	0.310684	0.146587	-0.178163	-0.0196711	-0.17646	-0.144585	0.103301	-0.0100707	0.284931	-0.121683
P763	-0.150715	0.115544	-0.0878459	0.0452072	-0.169856	0.00070089	-0.230848	-0.252536	-0.198646	-0.0923608	-0.192078	-0.196695	-0.0709672	0.0824471	-0.0468777	-0.178293	-0.217551	0.150167	-0.0604806	-0.0904626	-0.180755	-0.137286	-0.112428	0.107178	-0.288668	0.249572	-0.255084
P764	-0.153817	-0.0543318	0.145042	-0.123119	0.0515441	-0.0373685	0.221128	-0.0453264	0.205266	-0.0927777	0.025772	-0.0474313	0.0927877	-0.0671761	-0.0522376	0.0914503	0.0052085	-0.0261255	0.122164	0.0718125	0.0430721	0.070899	-0.0671761	-0.1419	-0.1479	-0.143423	0.0536646
P765	0.675214	-0.264993	0.300539	0.214776	0.232224	0.356356	0.292245	0.254095	-0.160435	-0.295941	0.10266	0.266335	-0.0103876	-0.105638	-0.130416	-0.0182755	0.557501	0.0245062	-0.167526	0.0885062	-0.0213703	0.179245	0.522003	0.0771558	-0.0438452	-0.416995	0.390917
P766	0.0439	-0.103802	-0.170851	-0.00662879	-0.0560019	-0.0690203	0.0473944	0.0896388	-0.0820567	-0.112122	0.35161	0.29938	0.288226	-0.175521	-0.252714	0.0328958	0.158452	-0.0459872	-0.0694066	0.187971	-0.130388	0.0168716	-0.175521	0.20436	-0.162364	-0.152754	0.148486
P767	-0.209297	-0.0321204	0.170954	-0.0230137	-0.124322	-0.318794	-0.385919	-0.072465	-0.121274	-0.0627314	-0.0468943	0.0203278	-0.0262725	0.114119	0.0874626	-0.144955	-0.22929	0.136813	0.22316	-0.175923	-0.131024	-0.095336	-0.0914056	0.0375255	0.451952	0.217432	-0.186087
P768	-0.116652	0.135082	-0.0860391	-0.145826	-0.107078	-0.207245	-0.227303	-0.128875	-0.146942	0.0861754	0.0352949	0.135792	0.290882	-0.144585	-0.0303499	0.158974	-0.0346717	0.168048	0.181605	-0.0641259	0.117081	0.0907675	0.0452158	0.0728169	-0.0725639	0.143036	-0.164421
P769	0.245902	0.130114	0.0418885	-0.0577258	0.310606	0.0562605	0.263626	0.140149	0.187853	0.132659	0.42092	0.352438	0.452068	-0.0173038	-0.0108554	0.0626512	0.257965	0.0493506	-0.141125	0.161941	0.114488	0.180371	0.0125846	0.179145	-0.126798	-0.294807	0.183758
P770	-0.0785332	-0.126179	0.259914	-0.167526	0.183455	0.0949933	0.166017	-0.0108219	0.259981	-0.247811	0.175497	-0.120141	0.100749	-0.0914056	-0.0588691	0.229507	-0.100451	0.0196008	0.0420611	0.164581	0.160578	0.197799	-0.0914056	-0.161229	-0.178414	-0.188683	0.0994324
P771	-0.0577811	0.0898515	0.183942	0.0630995	0.374563	0.0925586	0.259531	0.0268362	-0.0675942	-0.0305245	0.121124	0.159888	0.149823	-0.0758099	-0.167668	0.25637	0.114654	-0.0620701	-0.120222	0.226773	0.129138	0.143251	-0.0758099	0.0138243	-0.22944	-0.193256	0.209813
P772	-0.10677	0.077554	0.292798	-0.085461	0.22305	0.0196777	0.200431	0.0107155	0.107873	-0.174849	0.13066	-0.0647238	0.115363	-0.0466293	-0.0444907	-0.0739467	-0.116969	-0.146986	0.221648	0.0956896	0.175594	-0.0189196	-0.0466293	-0.109071	-0.243809	-0.208652	0.0577439
P773	-0.169445	0.10547	-0.165464	-0.141966	0.0446224	-0.0717463	-0.0179253	-0.000542793	0.0791864	0.128736	0.308126	0.176564	0.385424	-0.187869	-0.117492	0.171161	-0.0644974	0.0775159	0.0888516	-0.0543658	-0.0370202	0.0820843	-0.187869	0.0591093	-0.10633	-0.0239165	0.0217721
P774	0.0147616	-0.110615	0.126839	-0.167526	0.271315	0.0275837	0.288365	-0.0324656	0.146259	-0.321195	0.20657	0.0069857	0.198848	-0.0914056	-0.229434	0.184864	0.15818	0.0907337	0.00527108	0.016078	0.130493	0.0282255	-0.0914056	-0.0844946	-0.338637	-0.332232	0.198484
P775	-0.0569834	0.0257913	-0.131972	-0.119131	-0.0456633	-0.179996	-0.0502154	-0.0759724	-0.105131	0.11372	0.124117	0.0569091	0.18503	-0.00642602	-0.0773464	0.0305322	0.0211899	0.278853	-0.12197	-0.00506015	-0.107972	-0.109252	-0.144585	0.01997	0.0324193	0.00311309	0.105791
P776	-0.174351	0.0718431	0.0396461	0.135856	-0.0254143	-0.125272	-0.0171949	-0.0724759	-0.134849	-0.194772	0.0473331	-0.0467928	0.209728	-0.11906	-0.200452	0.0618372	0.00381759	0.0602614	0.207937	0.1311	0.242846	-0.0826831	-0.11906	0.00924873	-0.0954237	0.0784527	-0.0500926
P777	-0.191949	0.193632	-0.0423041	-0.15364	0.296235	0.0304182	0.258617	0.151108	0.370222	0.0338602	-0.109443	0.0080805	0.0561531	0.149538	0.138907	0.0639954	-0.065167	-0.264249	0.0638803	0.10095	0.0815608	0.100218	-0.0838294	-0.183681	-0.129175	-0.0491192	-0.0981794
P778	-0.369555	0.0486679	-0.0606267	-0.0134718	-0.227356	-0.393109	-0.428141	-0.278319	-0.192094	0.115615	-0.256455	-0.232234	-0.204342	0.126442	0.0585241	-0.200403	-0.386806	-0.135516	0.320645	-0.0635634	0.00698798	-0.19643	-0.200285	0.00541789	0.0630627	0.46185	-0.285674
P779	-0.387788	0.0798439	-0.0243627	0.203695	-0.369953	-0.238068	-0.36664	-0.147896	-0.17025	0.0827513	-0.17488	-0.211277	-0.0706467	-0.0634214	0.126083	-0.115801	-0.424831	0.135306	0.0681441	-0.411439	-0.012518	-0.356454	-0.169358	0.0905265	0.172051	0.460144	-0.412072
P780	-0.0748081	-0.0819542	-0.127803	-0.0598782	-0.161436	-0.0430849	0.0685793	0.193287	0.0433017	0.120014	-0.161436	0.103924	0.114215	-0.0326708	0.042862	-0.0518107	-0.0819542	0.166739	-0.0518107	0.0771795	0.180559	-0.0433976	-0.0326708	-0.0857783	-0.0857241	-0.0443006	0.0959891
P781	-0.359523	0.177991	0.0264173	0.231311	-0.311798	-0.426683	-0.460849	-0.422803	-0.381533	-0.217272	-0.148846	-0.24198	-0.105492	-0.157014	-0.122494	0.022408	-0.235196	0.23725	0.224498	-0.225373	-0.131765	-0.201651	-0.157014	0.0348754	-0.112712	0.31929	-0.267304
P782	-0.257432	-0.000752063	0.160499	0.169589	-0.228659	-0.163469	-0.445713	-0.0960888	-0.428069	-0.0747683	-0.244274	-0.154538	0.0953193	0.0662303	-0.063183	-0.178293	-0.200733	0.32709	0.279526	-0.183179	-0.0439514	-0.0547948	-0.112428	0.109915	-0.00471995	0.321417	-0.295487
P783	-0.287521	0.404391	-0.199352	-0.12336	0.0492921	-0.0346242	0.00519173	0.0266048	0.310564	0.227638	-0.180399	0.0275362	0.0508049	0.076102	0.350742	-0.0414641	-0.314986	-0.210818	-0.199131	-0.047142	-0.0697472	-0.173165	-0.125568	-0.133572	-0.0486226	0.253388	-0.203724
P784	0.353867	-0.0162642	-0.058495	-0.0917083	0.304499	0.0266947	0.271622	0.113791	0.0559302	-0.0153112	0.34659	0.403834	0.266325	-0.0362647	-0.0423003	0.365002	0.455344	0.116739	-0.113004	0.322083	0.0668938	0.225136	0.150334	0.163336	-0.233041	-0.457942	0.290939
P785	0.270882	-0.116969	0.096415	-0.085461	0.0876349	0.17464	0.179075	0.110803	0.0660722	-0.261828	0.0523092	0.166754	-0.0758068	-0.0466293	0.0315884	0.180161	0.304545	-0.146986	-0.0739467	0.0574138	0.143912	0.0666691	0.357774	0.109739	-0.000444907	-0.208652	0.191574
P786	0.610565	-0.282024	0.287869	0.0362157	0.225765	0.382686	0.428443	0.165242	-0.0829044	-0.263995	0.195681	0.327933	0.165957	-0.112428	-0.353353	0.122999	0.655731	0.0988019	-0.178293	0.36228	0.0795107	0.358311	0.331015	0.0897894	-0.0160907	-0.503081	0.373017
P787	0.377194	-0.22929	0.0919452	-0.167526	0.206031	0.143711	0.244758	0.191857	-0.0122722	-0.321381	0.106884	0.272883	0.124755	-0.0914056	-0.0555051	0.1669	0.530562	0.0565215	-0.144955	0.0772741	0.0574205	0.198178	0.412552	-0.0497119	-0.133125	-0.409012	0.312692
P788	-0.502161	0.270755	-0.292417	-0.0429408	-0.157623	-0.406224	-0.451038	-0.260689	-0.0682999	0.283614	-0.0989867	-0.0983151	-0.229773	-0.0108802	0.0496438	-0.187747	-0.454849	0.113167	0.160131	-0.254298	-0.201981	-0.254237	-0.238306	0.128283	0.122935	0.505657	-0.184395
P789	0.0442813	0.0264923	0.121785	0.116652	0.202137	0.110808	-0.0515014	-0.0916968	0.0201846	0.000401784	0.246829	0.115129	0.000299479	-0.0847762	-0.16769	0.00450977	0.0294022	0.110183	-0.0616861	-0.0141041	0.188121	0.294101	-0.126677	-0.00405693	0.152568	0.0137416	0.0729501
P790	0.262294	-0.247461	-0.056006	-0.180803	0.109468	0.221871	0.274728	0.151696	0.182099	-0.232489	0.0493446	0.286698	0.186002	-0.0986497	-0.257903	0.197179	0.48015	0.171233	-0.156443	0.0330734	0.168162	0.200967	0.105824	-0.123735	-0.0854187	-0.405067	0.210912
P791	-0.185464	0.000480626	-0.0452718	0.35094	-0.353546	-0.0754233	-0.366022	-0.10627	-0.216171	0.0179099	0.0537827	-0.030283	-0.0358419	-0.138311	-0.21294	-0.0716212	-0.246862	0.111249	0.164892	0.0234799	0.0320034	-0.088903	-0.138311	0.155632	0.0592913	0.324966	-0.044667
P792	-0.225884	0.277682	0.0763034	0.225638	-0.326429	-0.29774	-0.321202	-0.192032	-0.181148	-0.0940076	-0.106774	-0.143111	0.0302065	-0.0986497	0.0158836	-0.156443	-0.173673	0.0325774	0.151262	-0.307312	-0.12798	-0.178273	-0.0986497	0.0752301	0.168249	0.189461	-0.321998
P793	-0.191949	0.0410374	0.0356319	0.00413846	0.0980437	0.0332322	0.233688	0.149059	0.195413	0.0910492	-0.0656791	0.0569675	0.0367523	-0.0838294	-0.0470576	0.197166	-0.210285	-0.142611	-0.13294	0.103217	0.0691261	0.115132	-0.0838294	-0.31107	-0.111179	-0.204537	0.225942
P794	0.0678235	-0.00259125	0.0954344	0.0230949	0.056136	0.131691	0.106227	0.0256218	-0.048065	-0.0847737	0.345666	0.245743	0.129616	-0.00604412	-0.185031	0.141385	0.0517699	0.11575	-0.126672	0.290931	-0.0559183	0.122443	-0.163191	0.177055	-0.211848	-0.230089	0.161672
P795	0.395291	-0.0811383	0.00685546	-0.138942	0.0370734	0.100193	0.211068	-0.0262802	0.246043	-0.171067	0.0889467	0.0529062	0.0249088	-0.0758099	0.120217	0.237759	0.416986	-0.105188	-0.120222	0.0653402	-0.160769	0.191185	0.172571	0.29545	0.0143219	-0.189144	0.138096
P796	-0.430175	0.261105	-0.112537	0.0106237	-0.41765	-0.388094	-0.458154	-0.236866	-0.226364	0.144299	-0.159413	-0.167263	-0.219455	-0.187869	-0.0599683	-0.212808	-0.394618	0.0458197	0.31594	-0.215018	-0.0134024	-0.272693	-0.187869	0.0252336	0.149676	0.480899	-0.164389
P797	-0.0172313	-0.13079	0.135594	-0.0320636	0.142459	-0.00221515	0.253013	0.136728	0.0831802	-0.146315	0.262361	0.123107	0.171575	-0.131978	-0.244053	0.0566627	0.15601	0.132857	0.0535682	-0.0866775	0.0171236	0.255463	-0.131978	-0.103372	-0.157746	-0.503311	0.170265
P798	-0.34533	0.281044	0.00201125	0.178341	-0.181042	-0.384941	-0.456518	-0.232972	-0.22324	0.0777051	-0.196148	-0.0874972	-0.0109688	0.106599	0.105136	-0.128126	-0.319564	0.0726998	0.142104	-0.0904188	-0.321447	-0.218864	-0.150815	0.154969	-0.0841806	0.366893	-0.478491
P799	-0.416025	0.187752	0.159862	0.143962	-0.279451	-0.438674	-0.378578	-0.318053	-0.391176	-0.0294294	-0.198905	-0.193983	-0.178919	-0.0770805	-0.182149	-0.12655	-0.413701	0.105195	0.0931214	-0.121063	-0.129268	-0.325846	-0.18169	-0.0308109	-0.11392	0.367394	-0.210964
P800	0.293419	0.050349	0.18217	-0.0715732	0.291655	0.148952	0.206893	-0.0706937	0.0382865	-0.209266	0.325747	0.0670965	0.23654	-0.0421147	0.0356751	0.129845	0.318517	0.111441	0.0101807	0.0662508	0.0861294	0.160446	0.231822	0.261946	-0.254058	-0.357881	0.156594
P801	-0.352991	0.0794993	0.0288341	0.175035	-0.213296	-0.25143	-0.364008	-0.181627	-0.223005	-0.13753	-0.00741589	-0.0920709	-0.110135	-0.18169	-0.114581	-0.0167854	-0.355063	0.223093	0.216784	-0.126637	-0.0610426	-0.186849	-0.18169	0.0172434	-0.0759881	0.365943	-0.156049
P802	0.240022	-0.144585	-0.013177	-0.105638	0.0260784	-0.0386967	0.150686	0.0515729	0.145935	-0.121264	0.180403	0.176585	0.312256	-0.0576386	-0.180659	0.183761	0.260254	0.153479	-0.0914056	-0.0537312	0.00928518	0.194795	-0.0576386	-0.0193521	-0.0334553	-0.200174	0.0551425
P803	0.0943402	0.0190181	-0.0498866	-0.0561804	0.119122	-0.0039137	0.145771	0.443537	0.0672767	0.0156361	0.038492	0.196984	0.0357536	-0.0914056	0.278585	-0.0105422	0.055903	0.253598	-0.144955	0.0236184	0.216624	-0.0944214	0.361903	-0.0657942	-0.122161	-0.268071	0.275151
P804	-0.287521	0.114477	0.143321	0.37473	-0.165357	-0.217079	-0.335266	-0.281959	-0.241874	-0.208867	-0.174403	-0.117508	-0.211457	0.0223232	-0.182809	-0.0483605	-0.182692	0.200023	0.0647392	-0.242002	-0.257308	-0.100684	-0.125568	0.0160846	-0.0940503	0.219025	-0.209314
P805	-0.0653456	0.0715241	-0.0110574	-0.0929852	0.148994	0.015054	0.235825	0.206699	-0.0196687	-0.0722849	0.208399	0.176211	0.165512	-0.125568	-0.177418	-0.0757734	0.00649062	-0.0567741	-0.071377	0.194361	0.27248	0.063888	-0.125568	-0.0584939	-0.2515	-0.446614	0.325836
P806	-0.130144	0.122218	0.053163	0.0936665	0.0244451	-0.100431	0.086759	-0.192784	-0.126065	-0.102313	-0.174031	-0.0487433	-0.0739029	-0.157014	-0.14545	0.161687	0.0288695	0.0890317	0.000570662	0.0540401	0.0660482	0.0391257	-0.157014	-0.11016	-0.133113	-0.00897163	0.113816
P807	-0.295044	0.0951026	-0.235928	-0.11528	-0.186632	-0.164055	-0.241535	-0.0729348	-0.0820535	0.2332	0.00818126	-0.159167	0.0201568	0.113932	0.132334	-0.268575	-0.363715	0.258108	-0.126522	-0.160755	-0.0782644	-0.300676	-0.169358	0.0275516	-0.214618	0.229204	-0.118325
P808	-0.153817	-0.16851	0.234798	0.0741199	0.240593	-0.0103085	0.22914	0.0343233	0.0812645	-0.158796	0.0479556	0.0299481	0.157493	-0.0671761	-0.203502	0.28957	0.0180766	-0.0123752	0.106392	0.226338	0.051108	0.214806	-0.0671761	-0.262796	-0.202701	-0.300593	0.23097
P809	0.241413	0.0663393	-0.0677811	-0.0459124	0.339769	0.232589	0.453274	0.238458	0.203778	-0.0443382	0.363941	0.344249	0.227532	-0.0660899	-0.0843411	0.255589	0.270808	-0.00248012	-0.0768026	0.252957	0.209269	0.216341	-0.0818113	0.202882	-0.431204	-0.420155	0.197406
P810	-0.137519	0.284174	-0.195339	-0.264993	0.1064	0.129034	0.179295	0.030257	0.29156	0.234338	0.217153	0.0426005	0.152982	0.0642602	0.114088	0.0186211	-0.135287	-0.0310947	-0.122288	-0.0359271	0.0740954	-0.074495	-0.144585	0.0208213	-0.190239	-0.11718	-0.0498529
P811	0.394655	-0.25721	0.275844	0.100358	0.237562	0.175558	0.437729	0.299224	0.161157	-0.355646	0.330223	0.299179	0.331531	-0.144585	-0.178605	0.170687	0.415826	0.0372768	-0.100292	0.28668	0.191638	0.275143	0.177884	-0.0875183	-0.0989132	-0.618007	0.400976
P812	0.121777	0.0575247	0.11185	0.028283	0.0662649	0.18672	0.171926	0.0203117	-0.0565853	-0.0033946	0.114744	0.309151	0.141568	-0.125568	-0.255294	0.0293956	0.262425	-0.13788	-0.199131	0.17888	0.0571797	0.072986	0.0913224	0.0108896	-0.192893	-0.281559	0.179535
P813	0.735047	-0.209585	0.220347	-0.000547157	0.306551	0.388525	0.527912	0.336571	0.101493	-0.353557	0.296189	0.385228	0.0665194	-0.157014	-0.151883	0.100589	0.643863	-0.115953	-0.248999	0.144577	0.00689429	0.292684	0.409635	0.0142191	-0.0257325	-0.702588	0.532051
P814	0.312694	-0.116969	0.149479	-0.085461	0.0115488	-0.0319763	0.147932	0.0788847	0.08495	-0.2992	0.115714	0.210802	0.0327166	-0.0466293	0.019131	0.180161	0.352183	-0.146986	-0.0739467	-0.09836	-0.0497555	0.167574	0.357774	-0.0398444	0.0306986	-0.208652	0.109147
P815	-0.153817	-0.16851	-0.158864	0.0968782	-0.0267507	-0.153017	0.00785166	0.16439	0.124811	0.0884513	-0.0218573	0.0663714	0.191816	-0.0671761	0.138606	0.0980912	-0.16851	0.201762	-0.106531	0.139938	0.114752	-0.0120058	-0.0671761	-0.177656	-0.18844	-0.247264	0.183993
P816	0.0348406	-0.113052	-0.0391319	-0.255601	0.199722	-0.143493	0.244925	0.142379	0.362018	0.0120588	0.355652	0.178951	0.321584	-0.187869	0.0426948	0.202607	-0.018643	-0.300275	0.126207	0.128538	0.00204305	0.279458	0.0908811	-0.0170806	-0.179905	-0.27483	-0.0675141
P817	-0.162704	0.195522	-0.180821	-0.0862736	-0.0798781	-0.279891	-0.0842705	0.055858	0.0564234	0.0887673	0.224574	0.163455	0.173704	-0.150815	0.0585487	-0.144123	-0.0962991	0.0616893	0.108092	-0.125957	0.0347742	-0.158263	-0.150815	0.0164688	0.0836409	0.191812	-0.0980052
P818	-0.136597	-0.128404	0.206366	0.1126	-0.116532	-0.186726	-0.132081	-0.137526	-0.240435	-0.110082	0.0317644	0.120718	0.101082	-0.0770805	-0.350841	0.020171	-0.0511142	0.167084	0.159835	-0.108594	0.0532389	-0.0595943	0.0125846	-0.299188	-0.0543598	0.0782397	0.0394113
P819	-0.414977	0.370355	-0.0868066	0.107701	-0.218334	-0.300409	-0.340214	-0.188861	-0.213248	0.236764	0.00311033	-0.272375	0.0364413	0.158685	0.114908	-0.201818	-0.430169	0.0802611	0.261113	-0.109346	0.079826	-0.264066	-0.312611	0.237659	-0.0853353	0.395412	-0.478732
P820	-0.30747	0.0884885	-0.125465	-0.124404	-0.103202	-0.0993878	-0.261587	-0.0192385	0.0749815	0.181658	-0.00312601	0.0104869	0.0337339	0.0800022	0.278369	0.0268131	-0.409363	0.116937	-0.160207	-0.151609	0.0223413	-0.31548	-0.163191	0.00458759	0.070587	0.345379	-0.216267
P821	-0.463653	0.284085	-0.0982357	0.0941028	-0.0792579	-0.223383	-0.454348	-0.298994	-0.0963742	0.233131	-0.201044	-0.339846	-0.156601	0.0944382	0.0929977	-0.0275631	-0.485352	-0.049215	0.105918	-0.0716663	0.0578746	-0.0858895	-0.251328	0.106666	-0.0892509	0.445741	-0.306352
P822	-0.401901	-0.00405603	0.134826	0.340603	-0.44158	-0.0287023	-0.508108	-0.227294	-0.401486	-0.105172	-0.235003	-0.383552	-0.257374	-0.0360617	-0.120579	-0.171203	-0.374649	0.237648	0.117919	-0.328446	-0.0966259	-0.2209	-0.175521	0.0322586	0.0678259	0.509323	-0.238456
P823	-0.209297	-0.22929	0.0691247	-0.037228	-0.451663	-0.00291179	-0.265129	0.050087	-0.253184	0.104968	-0.11611	-0.202522	-0.00651227	0.165717	-0.165706	0.0420611	-0.22929	0.334532	0.197773	0.0214996	0.0369578	-0.105459	-0.0914056	0.0907593	0.166578	0.330751	-0.0990202
P824	-0.272619	0.149281	0.113384	0.104196	-0.164969	-0.328115	-0.308475	-0.291809	-0.185032	-0.0952172	-0.0217348	-0.0127806	0.058928	-0.11906	-0.0292261	0.0901922	-0.108768	0.150979	0.191976	-0.203004	-0.0698655	-0.103204	-0.11906	-0.0347473	-0.0406377	0.0785862	-0.236403
P825	0.00943432	0.0470329	0.0281188	0.0540274	-0.0421708	-0.113369	0.0803377	-0.00412678	-0.0524129	0.0227656	0.233102	0.199012	0.0627946	-0.219121	-0.0221848	0.0647515	0.047255	-0.0982535	0.213409	-0.172701	-0.0494729	0.188732	0.127341	0.100883	-0.112086	-0.0894966	0.0728333

## Sheet: Solid Spearman P value
O.T.U#	M1	M2	M3	M4	M5	M6	M7	M8	M9	M10	M11	M12	M13	M14	M15	M16	M17	M18	M19	T20	T21	T22	T23	T24	T25	T26	T27
P499	0.868098	0.777615	0.417904	0.257632	0.991505	0.773801	0.747215	0.849066	0.741109	0.315272	0.91119	0.982718	0.44678	0.345806	0.536418	0.307673	0.778894	0.600726	0.212105	0.305977	0.517462	0.531844	0.491122	0.907923	0.220513	0.376654	0.703868
P500	0.0001562	0.0188883	0.177096	0.164652	0.110991	0.0038772	8.19e-06	0.0120878	0.384719	0.00543696	0.84499	0.0280816	0.564118	0.19992	0.0325341	0.441519	2.09e-06	0.757276	0.707018	0.171684	0.0820222	0.0115451	0.00411455	0.0420958	0.460585	9.35e-06	0.00022876
P501	0.449084	0.718036	0.673169	0.287089	0.350515	0.575129	0.73129	0.806091	0.782702	0.568713	0.325709	0.11814	0.514014	0.4938	0.480097	0.207565	0.795906	0.274301	0.370472	0.499296	0.845316	0.0553975	0.54223	0.309412	0.986235	0.466911	0.0370945
P502	0.0129707	0.339149	0.384714	0.234768	0.00283872	0.108819	3.29e-05	5.39e-05	0.428117	0.250813	0.0117892	0.00129725	0.412936	0.209329	0.506175	0.61013	0.00550516	0.328042	0.0225971	0.0567359	0.168333	0.148227	0.0704486	0.716875	0.670121	3.657e-05	0.0002038
P503	0.0001181	0.293627	0.509736	0.554709	0.0865158	0.0197361	0.00544237	0.250617	0.283196	0.466111	0.00796153	0.0431632	0.0338876	0.893515	0.0293641	0.535808	8.95e-05	0.573034	0.0667728	0.014238	0.255246	0.0291117	0.785117	0.486141	0.711177	0.00014011	0.0218397
P504	0.988585	0.959698	0.626144	0.59379	0.630608	0.505703	0.0448154	0.0504019	0.0390696	0.292601	0.792521	0.362558	0.702069	0.47365	0.437562	0.996476	0.659952	0.393097	0.967707	0.561336	0.0247477	0.124569	0.47365	0.284225	0.727818	0.294092	0.578353
P505	0.185438	0.62209	0.58784	0.246412	0.0568949	0.0264224	0.00014108	0.00480301	0.596668	0.355551	0.872696	0.0118299	0.626892	0.0350695	0.0797788	0.156357	0.0165176	0.209139	0.335568	0.00778156	0.0781452	0.0925656	0.216969	0.704485	0.0540016	0.00409434	3.952e-05
P506	0.144887	0.82474	0.616607	0.134398	0.00330772	0.111625	1.7e-07	0.0143674	0.0678828	0.422089	0.0392078	0.19407	0.56926	0.653594	0.301705	0.534667	0.0917229	0.536246	0.234011	0.00737894	0.0109649	0.123363	0.804453	0.92327	0.00162791	2.428e-05	0.0207979
P507	0.543734	0.875092	0.89751	0.250701	0.757116	0.764385	0.602103	0.868814	0.0342938	0.441453	0.215193	0.362571	0.117153	0.988325	0.493135	0.654498	0.453656	0.393062	0.422722	0.675138	0.577288	0.0292163	0.148166	0.774849	0.163959	0.925623	0.300171
P508	0.135911	0.389198	0.731985	0.330408	0.0334182	0.197465	0.147232	0.379128	0.414048	0.0271974	0.384172	0.750983	0.379749	0.87721	0.370478	0.657537	0.224858	0.380869	0.688265	0.752924	0.474438	0.320486	0.341043	0.395239	0.176505	0.00421636	0.0308132
P509	0.42801	0.629513	0.606232	0.787282	0.3592	0.17719	0.0186769	0.071559	0.124977	0.851028	0.35774	0.764733	0.111558	0.50688	0.514556	0.286687	0.809662	0.469985	0.833887	0.762143	0.446323	0.199149	0.372912	0.259093	0.0385772	0.919543	0.733528
P510	0.00075683	0.761574	0.338427	0.349814	0.0023899	0.0598324	3.513e-05	0.0756353	0.277913	0.105892	0.00180892	0.0284501	0.0326635	0.901504	0.180919	0.301178	0.00011709	0.889054	0.184433	0.0448177	0.761426	0.0335729	0.800979	0.505217	0.0943696	1.3e-07	0.00680167
P511	0.914148	0.600384	0.801033	0.870857	0.276503	0.23833	0.439382	0.769789	0.386012	1	0.824545	0.450329	0.0275499	0.157392	0.754743	0.494286	0.870829	0.289616	0.378642	0.849757	0.640117	0.781055	0.252285	0.462292	0.997707	0.319265	0.481542
P512	5e-08	0.0265445	0.00893262	0.854666	0.0017562	0.00034754	1.62e-06	0.0720282	0.511571	6.979e-05	0.152595	0.0250023	0.511878	0.184317	0.0764617	0.154573	0	0.761652	0.1416	0.103289	0.113404	0.0305554	0.0108591	0.832283	0.423844	5e-08	0.00037322
P513	0.00021129	0.113361	0.113405	0.990539	0.443016	0.00133371	0.00445628	0.349184	0.388538	0.0142513	0.268829	0.322372	0.691378	0.718026	0.161884	0.195923	8.265e-05	0.79359	0.806574	0.338636	0.915922	0.00078035	0.0730249	0.872452	0.187309	0.00226262	0.0980471
P514	0.453983	0.969965	0.491462	0.849372	0.128377	0.150225	0.0703643	0.12329	0.300844	0.615698	0.887208	0.425909	0.49083	0.219391	0.259912	0.037995	0.495514	0.0750176	0.409061	0.258165	0.72914	0.271496	0.977747	0.749332	0.0433207	0.104512	0.471725
P515	0.569325	0.513307	0.393887	0.235397	0.42311	0.477456	0.916399	0.791975	0.815297	0.781488	0.12686	0.862746	0.0233327	0.671348	0.929893	0.786846	0.638944	0.295379	0.626847	0.752179	0.40895	0.535421	0.19992	0.694248	0.587841	0.478676	0.758297
P516	0.0799979	0.92677	0.288432	0.132459	0.569637	0.371151	0.0670866	0.934435	0.842061	0.846782	0.00622051	0.0174535	0.198716	0.730353	0.0321786	0.440534	0.0383348	0.544975	0.796918	0.0119304	0.924287	0.0290206	0.216424	0.018692	0.0512394	0.0290218	0.555919
P517	0.0752074	0.71174	0.580264	0.156681	0.780484	0.16818	0.824003	0.162985	0.189613	0.00423395	0.924807	0.32461	0.401551	0.442729	0.0339325	0.905737	0.0505586	0.84702	0.907959	0.507602	0.0101949	0.934025	0.442729	0.540189	0.564444	0.0263204	0.644063
P518	0.0006224	0.6589	0.798719	0.219863	0.00074467	0.00782728	2.8e-07	0.00098223	0.00917828	0.769514	0.026084	0.0845602	0.0144713	0.727311	0.781238	0.0857121	0.00616985	0.965622	0.355692	0.0160294	0.051272	0.00451809	0.215212	0.673366	0.152726	4.84e-06	0.0007096
P519	0.00529965	0.0479352	0.715364	0.493033	0.683279	0.0171866	0.0361866	0.393115	0.386296	0.599921	0.304043	0.113047	0.591783	0.508289	0.556327	0.372355	0.0297839	0.355763	0.13165	0.0701275	0.37453	0.034521	0.0217401	0.377813	0.660517	0.27327	0.143085
P520	0.0162869	0.0991197	0.0862927	0.324531	0.130527	0.372576	0.00123205	0.00902962	0.106771	0.914653	0.0767071	0.0718714	0.0159338	0.981234	0.558147	0.424665	0.00168977	0.849646	0.502108	0.0124755	0.00250544	0.258009	0.54604	0.701182	0.505953	0.00315445	0.0797895
P521	0.0022546	0.335415	0.0964746	0.229027	0.0153982	0.0855718	6.541e-05	0.612946	0.0282614	0.00510941	0.097174	0.288079	0.193919	0.27173	0.908682	0.0945741	0.00025723	0.363092	0.498979	0.0610425	0.0326309	0.0606251	0.290128	0.86561	0.238472	0.00146505	0.167178
P522	0.039298	0.131514	0.949368	0.569636	0.0561043	0.136045	0.0058757	0.0997696	0.137027	0.236448	0.121119	0.00054183	0.146549	0.363438	0.430971	0.0155425	0.00957164	0.966055	0.588451	0.00052961	0.685878	0.00024712	0.67587	0.444927	0.0259748	0.0110693	0.223093
P523	0.514655	0.395066	0.0628793	0.297794	0.554621	0.419694	0.465135	0.958498	0.809501	0.10295	0.250819	0.842496	0.107458	0.735323	0.728779	0.165679	0.534854	0.723112	0.0882822	0.289054	0.301776	0.148774	0.00506784	0.349198	0.25353	0.495734	0.848379
P524	0.00456521	0.112766	0.68114	0.369575	0.138292	0.216059	0.00010661	0.028764	0.15713	0.116509	0.106922	0.00012852	0.429972	0.691846	0.250584	0.0336193	0.00023437	0.282999	0.702759	0.00362879	0.845244	0.0108299	0.288312	0.718001	0.0382639	1.652e-05	0.0555982
P525	0.00020143	0.0286136	0.607328	0.29917	0.0586818	0.00853867	2.14e-06	0.00836926	0.058585	0.0677524	0.213628	0.00411069	0.113392	0.107984	0.175604	0.226353	5e-07	0.966076	0.825882	0.0353955	0.0367444	0.00086029	0.369964	0.285388	0.871171	9.791e-05	0.00211436
P526	0.189255	0.370726	0.539892	0.701485	0.541022	0.703188	0.00678764	0.757078	0.083055	0.404251	0.480986	0.335595	0.752796	0.426358	0.787259	0.8716	0.0155704	0.137722	0.239237	0.223107	0.494965	0.0262105	0.549755	0.554274	0.164744	0.139542	0.719447
P527	0.00133863	0.331615	0.260598	0.53313	0.112593	0.0355917	0.00053074	0.458188	0.0350342	0.0176548	0.483865	0.230999	0.951859	0.138539	0.813261	0.634978	0.00032602	0.700728	0.250419	0.90021	0.783107	0.00469998	0.0723955	0.280816	0.674916	0.0005285	0.0458277
P528	0	0.00650175	0.204716	0.711547	0.0671082	0.00084671	5.247e-05	0.024962	0.761053	0.00114097	0.148674	0.0008391	0.452295	0.292253	0.0401993	0.489283	0	0.775582	0.0921979	0.138342	0.595828	0.00701969	0.00338964	0.92072	0.582156	9e-08	0.00113806
P529	0.0416546	0.910183	0.592108	0.219168	0.814222	0.0396335	0.0550946	0.249511	0.247821	0.94553	0.121741	0.773232	0.550874	0.428544	0.822464	0.651338	0.178091	0.499795	0.552428	0.967806	0.264693	0.638747	0.11734	0.750886	0.68321	0.0616052	0.04788
P530	1e-08	0.0462053	0.707784	0.383806	0.0244276	0.0066191	0.00023018	0.0111994	0.3077	0.0141025	0.0460234	0.0086375	0.479819	0.313918	0.112656	0.315765	2e-08	0.684238	0.107624	0.381935	0.975407	0.024358	0.110739	0.729841	0.650345	4.7e-07	0.00065303
P531	0.262193	0.933356	0.568927	0.764026	0.354315	0.0338202	0.410876	0.966304	0.0344648	0.319705	0.249353	0.388225	0.732122	0.626046	0.214627	0.438864	0.218765	0.482014	0.00877206	0.797358	0.33602	0.602463	0.626046	0.114641	0.769746	0.61467	0.189326
P532	0.066826	0.123322	0.794613	0.262748	0.883121	0.735307	0.3378	0.0737637	0.564172	0.0971602	0.806912	0.717157	0.326795	0.196601	0.77634	0.167526	0.0101195	0.479357	0.33326	0.333202	0.899	0.496671	0.175269	0.708181	0.208608	0.111514	0.167379
P533	0.0303819	0.752369	0.826977	0.0564355	0.0144431	0.0887255	5.592e-05	0.0136471	0.0192834	0.560557	0.0976267	0.19122	0.610276	0.652943	0.605037	0.684036	0.077543	0.90739	0.132435	0.194069	0.380769	0.917577	0.463609	0.775283	0.16113	0.0138064	0.00017329
P534	8.88e-06	0.0392734	0.374176	0.413872	0.0121396	0.00962059	0	0.00651973	0.262993	0.00291284	0.13454	0.0692088	0.566855	0.142611	0.202703	0.439031	2e-07	0.328346	0.32468	0.153007	0.612387	0.00836507	0.0178191	0.614039	0.0978607	4.2e-07	0.00024816
P535	0.0158434	0.00500369	0.672768	0.168039	0.908058	0.00227799	0.00186608	0.00269799	0.694538	0.521768	0.289442	0.623648	0.950867	0.033879	0.62384	0.430321	0.031638	0.514331	0.517784	0.763934	0.0974271	0.339002	0.018493	0.980802	0.680894	0.0546991	0.00676531
P536	3.7e-06	0.119661	0.309083	0.346447	0.00487204	0.00093173	0	0.0086677	0.0503422	0.0165774	0.101869	0.0828942	0.454658	0.639476	0.394457	0.428361	0.00011201	0.430553	0.403009	0.0590953	0.262194	0.00606828	0.020637	0.541427	0.0399119	1e-08	0.00014496
P537	0	0.0638099	0.426072	0.27326	0.0387597	0.00530113	0.00030847	0.0354632	0.242169	0.0225236	0.176313	0.0102646	0.550927	0.313918	0.168072	0.177299	0	0.938952	0.107624	0.922705	0.570434	0.0317702	0.00020454	0.760924	0.965677	4.7e-07	0.00222358
P538	0.005879	0.218765	0.208311	0.0677918	0.697183	0.583587	0.467639	0.274559	0.809923	0.0157604	0.810337	0.214728	0.316653	0.626046	0.425701	0.545484	0.0348494	0.810448	0.44246	0.909371	0.344684	0.145102	0.0842765	0.155117	0.263164	0.105031	0.238383
P539	0.0698504	0.0890907	0.673366	0.104467	0.0722398	0.148424	1.632e-05	0.0293125	0.0713636	0.152233	0.293432	0.0983051	0.0290835	0.233865	0.359859	0.0461995	0.0032643	0.178962	0.240649	0.0700061	0.257012	0.0014418	0.152835	0.244157	0.129583	0.00011623	0.0834716
P540	3e-08	0.0570051	0.0949625	0.947392	0.0192216	0.00501262	2.8e-07	0.0085058	0.239297	0.00539718	0.0199874	0.00046216	0.477927	0.169585	0.0168605	0.274862	0	0.297772	0.124369	0.0697637	0.593579	0.0262782	0.0448651	0.777796	0.345229	0	1.62e-05
P541	0.455146	0.80349	0.38346	0.872005	0.599104	0.880141	0.821943	0.905416	0.246529	0.143766	0.580481	0.839295	0.905202	0.657102	0.194849	0.463643	0.0537024	0.085506	0.531077	0.840022	0.241964	0.596778	0.310874	0.846599	0.00783007	0.590279	0.860215
P542	0.814814	0.715947	0.461439	0.757924	0.278686	0.487392	0.517183	0.216723	0.071157	0.936639	0.379856	0.114891	0.623808	0.314386	0.513107	0.275777	0.857137	0.743762	0.658472	0.262275	0.0499425	0.0574922	0.511979	0.161751	0.634146	0.312754	0.715981
P543	0.00148308	0.531262	0.299086	0.790922	0.00324304	0.13835	0.00044926	0.0982135	0.00502091	0.401064	0.236666	0.116615	0.204896	0.78939	0.626084	0.781217	0.00462908	0.997508	0.0236698	0.0263714	0.0505172	0.32429	0.865876	0.940558	0.455456	0.00024812	0.0791549
P544	0.00093079	0.102252	0.573068	0.43095	0.235868	0.00826549	0.00010832	0.0330023	0.10248	0.0974348	0.389579	0.0139748	0.908556	0.252285	0.291863	0.192747	1.149e-05	0.613499	0.0667728	0.216084	0.402607	0.0256453	0.135132	0.632443	0.483202	3e-08	0.00016051
P545	0.0337763	0.816148	0.351515	0.717085	0.103865	0.07879	0.0128873	0.862588	0.0322872	0.366056	0.507985	0.0078562	0.420443	0.619059	0.552621	0.538476	0.154244	0.64542	0.0590803	0.610221	0.312934	0.0354483	0.695318	0.711327	0.0576955	0.0406495	0.406876
P546	0.012883	0.625956	0.0480746	0.0514099	0.770122	0.273341	0.485884	0.387152	0.0966962	0.00542716	0.566027	0.301198	0.922874	0.555319	0.0753438	0.969741	0.124665	0.875905	0.928588	0.513118	0.80013	0.661181	0.0797622	0.984217	0.651764	0.739075	0.833042
P547	1.28e-06	0.00650175	0.00870928	0.620037	0.0239934	0.00431025	3.7e-07	0.0631422	0.532251	0.00023367	0.41748	0.00264613	0.731432	0.292253	0.0193653	0.183065	0	0.361422	0.573046	0.156764	0.74594	0.00859998	0.00173091	0.158262	0.53291	9e-08	0.00044218
P548	0.0226827	0.0509066	0.115923	0.187851	0.131408	0.221803	0.221385	0.159005	0.916278	0.101254	0.303648	0.874488	0.76851	0.345875	0.618498	0.009527	0.00905144	0.125595	0.723078	0.810294	0.669542	0.753366	0.38522	0.150385	0.765435	0.109375	0.00347626
P549	3e-08	0.0790025	0.0266779	0.515216	0.00361998	0.00083835	1.9e-07	0.0246973	0.600027	0.00564715	0.0280483	0.00520691	0.504403	0.233865	0.031234	0.252571	0	0.540231	0.204832	0.424075	0.469754	0.0221221	0.00253956	0.699267	0.508766	0	0.00013202
P550	0.0032179	0.214821	0.440169	0.745762	0.168918	0.176396	0.0151445	0.284532	0.369381	0.670269	0.665572	0.773451	0.746745	0.3303	0.951569	0.829939	0.13953	0.153068	0.756018	0.253642	0.782902	0.20873	0.169067	0.61106	0.508724	0.0478638	0.129239
P551	0.0453529	0.655809	0.0904571	0.220227	1.131e-05	0.104561	0.00042308	0.0391092	0.458161	0.193157	0.0931753	0.0238505	0.638182	0.567086	0.841088	0.535419	0.0167654	0.827208	0.24413	0.0831698	0.0157229	0.281237	0.216087	0.749713	0.245514	1.756e-05	0.0229447
P552	0.00145768	0.0509571	0.404611	0.115383	0.0480377	0.0103861	6.38e-06	0.0227294	0.126604	0.0241568	0.564496	0.0174143	0.449844	0.142611	0.0192253	0.162492	3.554e-05	0.904888	0.702577	0.109959	0.086743	0.0232982	0.022244	0.063134	0.22802	4.21e-06	0.00034958
P553	0.50378	0.773093	0.689545	0.740142	0.685844	0.268939	0.455408	0.643651	0.0882973	0.659126	0.55459	0.445356	0.420131	0.559175	0.495456	0.646187	0.387929	0.256098	0.146076	0.480109	0.702661	0.528156	0.478734	0.782111	0.862187	0.474621	0.498021
P554	0.0368907	0.530539	0.544358	0.31937	0.757737	0.645614	0.691321	0.896562	0.974535	0.139229	0.0994179	0.424244	0.196311	0.50688	0.00177469	0.76044	0.0510348	0.212641	0.186837	0.648671	0.751711	0.116171	0.50688	0.344044	0.0780272	0.153549	0.218207
P555	0.0081903	0.598554	0.160885	0.471911	0.0670953	0.074946	0.262205	0.587269	0.197276	0.11395	0.345509	0.576403	0.804313	0.4889	0.823816	0.384865	0.0622407	0.615864	0.271919	0.352467	0.509353	0.259394	0.74886	0.0545396	0.886635	0.0134137	0.312752
P556	0.101074	0.287982	0.66152	0.298247	0.195764	0.73733	0.0540369	0.173495	0.188159	0.718729	0.141877	0.0955335	0.19128	0.651481	0.533252	0.919644	0.134626	0.460308	0.317336	0.018866	0.739277	0.114406	0.751772	0.942116	0.710111	0.0304262	0.0700309
P557	0.00035721	0.0668236	0.0966577	0.543979	0.0008212	0.00172846	1.8e-07	0.00524885	0.369132	0.0133396	0.0210667	0.0315407	0.215523	0.169585	0.0957082	0.0379615	9.8e-07	0.127401	0.319681	0.174137	0.466367	0.00044303	0.0367302	0.529634	0.359777	0	8.1e-06
P558	0.961668	0.112615	0.53561	0.171823	0.0307145	0.11412	0.0822924	0.15885	0.240089	0.101489	0.161649	0.0882497	0.685609	0.833903	0.3192	0.0196276	0.177134	0.905775	0.499913	0.783278	0.626846	0.0583618	0.200751	0.318593	0.672552	0.00212799	0.0447563
P559	0.184084	0.78013	0.990091	0.108025	0.0350179	0.219154	0.192007	0.840827	0.24369	0.102128	0.0810742	0.379159	0.544506	0.852226	0.433251	0.00751429	0.120613	0.764785	0.949304	0.0607557	0.914565	0.0474842	0.292253	0.410792	0.908212	0.128379	0.0776155
P560	0.0769821	0.44757	0.649757	0.189044	0.276622	0.161817	0.00526528	0.581361	0.0352426	0.800994	0.329063	0.00645615	0.9901	0.638582	0.465474	0.970677	0.00552689	0.241017	0.00592203	0.787978	0.436291	0.457419	0.333537	0.600365	0.954166	0.009847	0.14378
P561	0.0111045	0.832501	0.278947	0.370717	0.11888	0.00786424	0.00096929	0.781596	0.0182285	0.0977603	0.12362	0.293742	0.732229	0.193481	0.276466	0.324466	0.00050371	0.60695	0.207213	0.189651	0.321998	0.0255092	0.425819	0.853628	0.853933	6.114e-05	0.111611
P562	0.00035887	0.0477438	0.00710687	0.580367	0.00509182	0.0218381	0.00120273	0.0771258	0.869659	0.00058128	0.335967	0.0894915	0.238403	0.118782	0.498688	0.161345	3.884e-05	0.406453	0.869587	0.15469	0.201417	0.00257392	0.047415	0.578597	0.259895	0.00059062	0.0137558
P563	0.336801	0.925802	0.785324	0.442729	0.366705	0.981358	0.584582	0.503826	0.527453	0.661335	0.0563836	0.82996	0.748396	0.675955	0.663267	0.50688	0.292253	0.897808	0.50688	0.622099	0.982993	0.976932	0.675955	0.936965	0.0645844	0.0572867	0.605983
P564	0.00067642	0.141818	0.142823	0.450617	0.0623866	0.772266	0.00116578	0.452484	0.0885429	0.110759	0.152576	0.0674399	0.912193	0.385611	0.28789	0.41003	0.00146301	0.352782	0.569092	0.357207	0.398352	0.278022	0.608777	0.675313	0.966531	7.761e-05	0.00864705
P565	0.418994	0.170663	0.0892906	0.700178	0.385289	0.489151	0.640728	0.429804	0.0171437	0.00602122	0.558568	0.62269	0.0594446	0.332944	0.109854	0.789441	0.0505586	0.148314	0.844989	0.208712	0.380967	0.239486	0.442729	0.239358	0.515371	0.704264	0.567391
P566	0.584181	0.263039	0.849163	0.460104	0.584089	0.218173	0.170487	0.00285895	0.689018	0.803387	0.6267	0.0281874	0.56904	0.685831	0.367023	0.901902	0.355902	0.988544	0.474998	1.684e-05	0.243065	0.873792	0.9947	0.495271	0.481172	0.5665	0.0311693
P567	0.810792	0.197174	0.953385	0.779115	0.159933	0.589798	0.682816	0.325799	0.747602	0.718921	0.570646	0.98483	0.609926	0.385492	0.132043	0.464876	0.792823	0.11833	0.752599	0.814303	0.71145	0.991131	0.258514	0.350179	0.203839	0.727301	0.676261
P568	0.294297	0.0685288	0.0970511	0.405153	0.0657635	0.511232	0.152755	0.41347	0.450895	0.0085372	0.347948	0.482229	0.204375	0.47365	0.0369743	0.00097927	0.111497	0.269712	0.234288	0.113665	0.809403	0.00959948	0.37034	0.93914	0.62905	0.0240962	0.00610029
P569	0.751231	0.911822	0.645757	0.650624	0.517327	0.895572	0.435756	0.0585077	0.0635094	0.702248	0.205898	0.167875	0.228358	0.0935489	0.971195	0.242856	0.83093	0.692714	0.995313	0.860765	0.0233674	0.584701	0.849697	0.656701	0.194017	0.236406	0.0292047
P570	0.270162	0.0600362	0.230971	0.122133	0.832847	0.907122	0.311882	0.94788	0.107167	0.00040699	0.417419	0.959141	0.0721012	0.830106	0.492797	0.810874	0.215528	0.289884	0.00680516	0.939967	0.161546	0.346229	0.16345	0.91584	0.423282	0.905583	0.49446
P571	0.362436	0.514481	0.176346	0.7623	0.190546	0.936969	0.232379	0.0316405	0.129024	0.796651	0.671602	0.596347	0.862903	0.706869	0.72578	0.16632	0.225402	0.732047	0.61986	0.928838	0.685906	0.231436	0.849622	0.357628	0.903933	0.788102	0.244679
P572	0.00385963	0.281627	0.613356	0.0853163	0.0207015	0.0628281	0.00013726	0.00797809	0.0155518	0.487611	0.237268	7.209e-05	0.729021	0.649255	0.856477	0.864073	0.00527969	0.648323	0.0839193	0.0743789	0.119648	0.0620272	0.0379137	0.140153	0.575518	7.726e-05	0.00297878
P573	0.206788	0.515962	0.01026	0.0909665	0.70102	0.0312535	0.832098	0.92321	0.0328807	3.578e-05	0.530331	0.7789	0.624461	0.54343	0.0255338	0.144973	0.0191646	0.489527	0.144973	0.318105	0.822835	0.103171	0.360994	0.375962	0.883804	0.101575	0.848132
P574	0.373908	0.750886	0.639627	0.354028	0.17013	0.579351	0.19611	0.77926	0.190801	0.903518	0.0105905	0.00831481	0.205179	0.891339	0.852125	0.00635183	0.21478	0.665132	0.480817	0.0805564	0.764072	0.403088	0.968302	0.439161	0.0628632	0.0467576	0.302021
P575	1.016e-05	0.146101	0.0940807	0.421984	0.442849	0.0294958	0.00028899	0.104874	0.469903	0.0315987	0.258078	0.0116413	0.556963	0.19992	0.157629	0.824997	2e-08	0.300451	0.246523	0.697925	0.326793	0.00321375	0.0227641	0.879587	0.681451	1.75e-06	0.00169992
P576	8e-08	0.207366	0.438633	0.976423	0.0110777	0.0265967	0.00057914	0.0145962	0.305022	0.347644	0.0727486	0.00168766	0.510153	0.967844	0.186641	0.409025	6.7e-07	0.110363	0.169694	0.222442	0.77534	0.0960932	0.0228043	0.7017	0.974686	6.38e-06	3.382e-05
P577	0.184797	0.450038	0.775022	0.529287	0.820131	0.80235	0.30465	0.734457	0.507414	0.502988	0.636229	0.794434	0.529988	0.974559	0.595774	0.131883	0.120021	0.423326	0.759044	0.831755	0.117398	0.232406	0.497035	0.492034	0.0323634	0.900625	0.814957
P578	0.280442	0.583695	0.935869	0.104197	0.600066	0.77979	0.382098	0.271473	0.708417	0.558715	0.894026	0.938313	0.817916	0.0469485	0.560837	0.298507	0.0520115	0.694506	0.227353	0.386838	0.89848	0.521487	0.9894	0.19828	0.0577611	0.832611	0.61501
P579	0.00062936	0.123072	0.352754	0.958341	0.00453093	0.0419759	1.025e-05	0.00737297	0.67518	0.0655842	0.0212301	0.0021569	0.312973	0.742969	0.27966	0.663785	0.00028567	0.85473	0.279216	0.0468558	0.678257	0.0372688	0.901504	0.942073	0.235734	2e-08	0.00025399
P580	0.128701	0.962226	0.58675	0.586347	0.0904737	0.241991	0.0989087	0.0480289	0.937358	0.891935	0.223359	0.170161	0.377752	0.626046	0.115709	0.47305	0.0343095	0.550631	0.438864	0.930581	0.843951	0.984993	0.626046	0.440535	0.779539	0.0257542	0.00110983
P581	0.00893351	0.793034	0.537821	0.425758	0.0956896	0.710136	0.00040566	0.316474	0.276284	0.854983	0.00179106	0.0104549	0.0626523	0.834439	0.230016	0.150155	0.0522718	0.84372	0.145241	0.0578824	0.809251	0.0440386	0.45411	0.85595	0.109266	0.00026825	0.118031
P582	0.162454	0.411262	0.113122	0.442589	0.402477	0.695405	0.98935	0.170602	0.146364	0.877508	0.490838	0.435693	0.681489	0.93059	0.531244	0.638068	0.321826	0.944654	0.557444	0.447148	0.221786	0.366435	0.8105	0.553633	0.967574	0.655614	0.848377
P583	0.00148865	0.294887	0.876364	0.244673	0.00143784	0.0385039	5e-08	0.00240442	0.00073154	0.511137	0.063136	0.00256447	0.204936	0.863712	0.730448	0.179926	0.00018927	0.496635	0.221141	0.0258557	0.336697	0.0651616	0.247811	0.903985	0.0917837	0.00019154	0.00562781
P584	0.00633276	0.079487	0.9726	0.308374	0.285532	0.0284022	0.0123009	0.385655	0.0171459	0.103277	0.684011	0.0766763	0.78957	0.834826	0.493281	0.585383	0.00161112	0.654994	0.844645	0.636493	0.0974836	0.0108937	0.454788	0.294029	0.449774	0.00105296	0.19938
P585	6e-08	0.0864306	0.406289	0.27326	0.137084	0.0692589	0.00538106	0.0182661	0.70155	0.00772176	0.184905	0.167132	0.315341	0.313918	0.640511	0.381686	6e-08	0.698677	0.107624	0.466104	0.625814	0.204317	0.00284523	0.486869	0.518692	2.144e-05	0.00524993
P586	0.130543	0.183834	0.116897	0.503502	0.0176251	0.043311	0.00025278	0.148575	0.366192	0.181625	0.610506	0.0348876	0.944814	0.130316	0.0816035	0.134597	0.0107407	0.904287	0.922998	0.0421595	0.0913339	0.00042508	0.155044	0.238137	0.146652	0.00090035	0.0280204
P587	0.00156566	0.0791217	0.776023	0.0895356	0.0355275	0.0202673	0.0515437	0.120169	0.364837	0.0179245	0.103935	0.127179	0.349938	0.336801	0.0818862	0.0755892	2.857e-05	0.26802	0.125135	0.498231	0.316193	0.122358	0.803482	0.210093	0.847195	0.00037365	0.01143
P588	0.977043	0.286582	0.644088	0.276129	0.0528915	0.551784	0.891458	0.0708657	0.126946	0.355837	0.747157	0.917967	0.324863	0.168879	0.00493463	0.915877	0.899765	0.898611	0.878014	0.23555	0.437338	0.858402	0.216602	0.567941	0.651931	0.650373	0.616483
P589	0.00035088	0.0198322	0.367192	0.757975	0.0201058	0.0843538	0.00034583	0.00414042	0.159459	0.0152694	0.015793	0.0120588	0.143125	0.252285	0.153628	0.325001	3.57e-06	0.57216	0.396083	0.587738	0.825961	0.020867	0.0157041	0.635068	0.35219	1e-07	0.00139473
P590	0.0130422	0.243204	0.554368	0.27547	0.215155	0.0437219	0.120954	0.918587	0.0230986	0.0478834	0.335935	0.142289	0.160091	0.404897	0.182581	0.787711	2.15e-05	0.50644	0.482225	0.309505	0.525217	0.422399	0.012684	0.730099	0.888952	0.121312	0.157997
P591	0.266024	0.481956	0.879247	0.993308	0.703492	0.435609	0.0691282	0.887799	0.844606	0.323694	0.0346495	0.17959	0.103496	0.448965	0.18212	0.945694	0.163544	0.833479	0.74758	0.4331	0.32264	0.485312	0.720198	0.565681	0.0187319	0.013464	0.626708
P592	0.157382	0.636432	0.836974	0.994019	0.135546	0.398838	0.0284767	0.19003	0.688143	0.430917	0.00515268	0.0907415	0.0443055	0.542864	0.0180577	0.817905	0.0121336	0.818573	0.33326	0.964546	0.648538	0.698338	0.542864	0.578477	0.896241	0.00477494	0.0481288
P593	0.58608	0.167956	0.128335	0.775664	0.591932	0.40304	0.693381	0.729716	0.0820443	0.0597989	0.516735	0.819366	0.193943	0.753632	0.0504613	0.597112	0.21679	0.416265	0.167418	0.819941	0.243318	0.575882	0.386612	0.907303	0.735615	0.649094	0.736649
P594	0.0375512	0.0588027	0.0179065	0.47222	0.325459	0.354858	0.00944928	0.330164	0.850809	1.28e-05	0.780162	0.994556	0.182732	0.0572867	0.0418518	0.497801	0.00613142	0.412976	0.56531	0.353069	0.131002	0.43267	0.550617	0.166282	0.616789	0.00275559	0.113448
P595	0.575253	0.241453	0.87214	0.370796	0.347386	0.79832	0.252797	0.207869	0.425051	0.13625	0.924409	0.00382398	0.859187	0.690487	0.77478	0.135825	0.826389	0.238392	0.43773	0.997913	0.736606	0.796683	0.190444	0.091084	0.552196	0.607971	0.632105
P596	2e-08	0.0219827	0.0205492	0.504122	0.0093103	0.00318424	3e-07	0.0711956	0.550628	0.0048609	0.0530874	0.0207056	0.231053	0.27173	0.0138818	0.390757	3e-08	0.509662	0.42059	0.0244385	0.684585	0.0109061	0.0972764	0.570579	0.687879	2e-08	0.00022725
P597	7.99e-06	0.215272	0.598915	0.446504	0.00663017	0.00207198	0	0.00050428	0.0536416	0.340426	0.015605	0.0163574	0.0548744	0.612645	0.386797	0.85278	5.876e-05	0.601419	0.628997	0.21928	0.111185	0.00230323	0.0155314	0.628132	0.196038	4e-08	0.00061145
P598	0.015051	0.0363727	0.870622	0.333943	0.917341	0.0552278	0.115823	0.945894	0.680502	0.466074	0.283911	0.426291	0.90258	0.232989	0.450984	0.997285	0.00148364	0.397215	0.0764459	0.468021	0.780503	0.553232	0.205991	0.289223	0.400341	0.331338	0.400152
P599	0.329336	0.964653	0.717282	0.943393	0.922626	0.80181	0.0158066	0.730712	0.0118799	0.477	0.341969	0.161379	0.469688	0.720199	0.455726	0.757064	0.570278	0.395212	0.580059	0.0324085	0.605055	0.505771	0.727181	0.305018	0.089078	0.142962	0.330454
P600	0.0052374	0.128411	0.0707224	0.592344	0.426254	0.038221	0.00639826	0.623729	0.813864	0.0508569	0.373425	0.18706	0.341458	0.175159	0.0989357	0.863924	3.826e-05	0.340758	0.85534	0.621761	0.739136	0.0604454	0.519479	0.448413	0.286145	0.00090121	0.0168054
P601	0.560454	0.69846	0.617022	0.156681	0.1597	0.399907	0.0235539	0.0674047	0.0620857	0.06256	0.460941	0.32645	0.302106	0.442729	0.838253	0.499142	0.198534	0.934141	0.971495	0.761328	0.0344379	0.852828	0.427131	0.51405	0.171669	0.00098671	0.0139152
P602	0.950075	0.776053	0.497414	0.278068	0.848746	0.889073	0.824039	0.117066	0.144635	0.543107	0.544019	0.0846685	0.977756	0.413796	0.409356	0.885792	0.558197	0.951069	0.792944	0.995037	0.913702	0.649157	0.413796	0.833028	0.795101	0.926707	0.679636
P603	0.99336	0.881833	0.344569	0.646478	0.728618	0.638842	0.303811	0.644414	0.332062	0.83534	0.997602	0.244435	0.669416	0.169585	0.10924	0.57896	0.460106	0.624408	0.96544	0.877947	0.790952	0.324542	0.649682	0.160763	0.736789	0.169075	0.25485
P604	0.259114	0.0685288	0.74436	0.73265	0.311522	0.308298	0.0503734	0.470989	0.181287	0.103289	0.424238	0.153555	0.279439	0.47365	0.125978	0.0237737	0.0541658	0.277319	0.254036	0.370534	0.648242	0.07829	0.47365	0.381801	0.294592	0.00215699	0.0353105
P605	0.704599	0.728022	0.647868	0.787431	0.0497082	0.695793	0.261298	0.601136	0.382224	0.325527	0.553972	0.0465214	0.993198	0.4599	0.825584	0.0836728	0.576948	0.469116	0.221507	0.49074	0.953107	0.469439	0.603616	0.192442	0.587526	0.00184603	0.0203517
P606	3.056e-05	0.0817454	0.0675745	0.397315	0.00054725	0.00496763	0	0.00143641	0.250643	0.00704946	0.116831	0.00086229	0.233469	0.130316	0.409632	0.0632104	1e-07	0.314115	0.0635794	0.00460739	0.14019	0.00011485	0.00976344	0.454579	0.0673038	1e-08	0.00038577
P607	0.159801	0.638618	0.090247	0.700129	0.354681	0.855217	0.181106	0.123562	0.28976	0.101875	0.0765925	0.198126	0.00468806	0.413796	0.162103	0.851975	0.36992	0.438319	0.374988	0.89606	0.479674	0.310265	0.630927	0.641792	0.918276	0.00163844	0.230697
P608	0.487246	0.658078	0.980901	0.614738	0.399444	0.0461282	0.0861456	0.289837	0.232148	0.891458	0.912911	0.619904	0.973927	0.53606	0.486842	0.320844	0.918785	0.166418	0.748484	0.125242	0.556192	0.264168	0.642613	0.70255	0.189006	0.294746	0.638447
P609	2.669e-05	0.335718	0.272082	0.864383	0.044706	0.00521532	0.00036319	0.0130776	0.05705	0.0174689	0.0542883	0.0401162	0.628174	0.336801	0.214796	0.674032	9.325e-05	0.411795	0.458532	0.806913	0.283392	0.215629	0.0872412	0.807679	0.826897	2.07e-06	0.00381854
P610	0.529111	0.114346	0.608074	0.791606	0.780683	0.247645	0.0443645	0.129545	0.384688	0.083679	0.0962745	0.395877	0.138743	0.228694	0.148416	0.504932	0.103882	0.207921	0.908716	0.481421	0.964241	0.103953	0.257944	0.915425	0.938741	0.655062	0.610668
P611	8.3e-07	0.303106	0.766565	0.936088	0.0360441	0.0106727	4.47e-06	0.0037222	0.2234	0.187926	0.0780694	0.00046093	0.204718	0.967096	0.348908	0.45152	1.75e-06	0.377552	0.0271607	0.00397475	0.431333	0.011385	0.1426	0.80033	0.137721	6.9e-07	0.00114005
P612	0.00021829	0.00199251	0.591691	0.796015	0.0526873	0.0241331	2.82e-06	0.00838114	0.339649	0.0116572	0.100842	0.0025105	0.0585972	0.169585	0.0206155	0.0055007	6.64e-06	0.753074	0.482338	0.0237938	0.505924	0.00097884	0.0417367	0.506738	0.118758	6.8e-07	0.0047162
P613	0.00502584	0.0783064	0.0130137	0.25719	0.0154544	0.0582031	5.905e-05	0.0319473	0.260722	0.0156285	0.519334	0.0390403	0.154027	0.438058	0.235142	0.0928187	9.976e-05	0.490361	0.197262	0.0186092	0.579365	0.0284721	0.0388537	0.0650953	0.240995	0.00011505	0.0100687
P614	0.141175	0.148148	0.881667	0.243587	0.386025	0.029114	6.12e-06	0.369488	0.399111	0.297658	0.0276447	0.101174	0.903288	0.552467	0.00709605	0.403266	0.0319022	0.371873	0.296658	0.0499242	0.559141	0.0180948	0.118782	0.583468	0.00253316	0.00019977	0.0188223
P615	1.37e-06	0.00650175	0.240112	0.635498	0.0896506	0.00588014	5.107e-05	0.0179367	0.807924	0.0621168	0.110519	0.00122999	0.327628	0.292253	0.00511487	0.133347	0	0.846261	0.0921979	0.296944	0.647214	0.0015988	0.0018739	0.77986	0.510048	3.7e-07	0.00147492
P616	0.0311949	0.927621	0.32931	0.950732	0.138484	0.167721	0.0585907	0.253358	0.631429	0.332767	0.00574119	0.0293839	0.0228241	0.526877	0.42131	0.42829	0.0516019	0.0519557	0.732024	0.379256	0.564205	0.0253948	0.671045	0.230894	0.779374	0.00716154	0.475171
P617	0.109663	0.767211	0.442667	0.582457	0.942933	0.02117	0.203616	0.810859	0.825633	0.758417	0.0941627	0.467858	0.209009	0.600695	0.295382	0.442634	0.793579	0.969461	0.609855	0.988316	0.210433	0.971285	0.0749578	0.505193	0.14643	0.486779	0.126426
P618	0.207552	0.869458	0.251307	0.675645	0.05644	0.215888	0.992906	0.990805	0.548394	0.745629	0.135569	0.682347	0.675833	0.61458	0.65257	0.095456	0.240548	0.318863	0.0801718	0.798831	0.736362	0.627454	0.853963	0.129177	0.932896	0.0257918	0.0292936
P619	0.0436614	0.515503	0.926775	0.199367	0.085326	0.427594	0.00752175	0.270827	0.3349	0.809837	0.0296857	0.0698655	0.0596323	0.575767	0.248433	0.177688	0.11327	0.0962154	0.759205	0.0363917	0.910191	0.0810012	0.137851	0.789609	0.26017	0.0168939	0.188072
P620	7.65e-06	0.178359	0.217308	0.924423	0.0125369	0.0237532	1.712e-05	0.0146861	0.786303	0.0718557	0.0144385	0.00718515	0.0803361	0.233865	0.191288	0.22088	9.2e-07	0.524371	0.0564123	0.0407554	0.856301	0.0050612	0.0164776	0.52811	0.558887	1.9e-07	0.00077499
P621	0.00040387	0.87638	0.482967	0.579864	0.0325424	0.0827392	2.866e-05	0.0313372	0.00493257	0.285683	0.0751661	0.0257651	0.0456474	0.642688	0.810142	0.64925	0.00943196	0.710507	0.384255	0.18815	0.694147	0.118973	0.13614	0.342947	0.670311	5.335e-05	0.0146642
P622	1e-08	0.00608196	0.064918	0.65227	0.0268742	0.00047262	1.192e-05	0.0504253	0.463475	0.00032353	0.476086	0.0905382	0.544858	0.19992	0.0152051	0.1908	0	0.884904	0.904504	0.0845496	0.192667	0.00306502	0.00796918	0.787192	0.892843	2.041e-05	0.00056492
P623	0.587782	0.0298667	0.792226	0.69536	0.372763	0.280448	0.417927	0.752493	0.693029	0.554397	0.105881	0.202334	0.10748	0.843259	0.737922	0.207761	0.477685	0.524749	0.794858	0.952152	0.490904	0.653401	0.332521	0.992997	0.20786	0.200454	0.442843
P624	0.48433	0.111764	0.0555817	0.276479	0.0549185	0.493812	0.0205674	0.158105	0.438446	0.620652	0.0470696	0.0312972	0.457325	0.0232854	0.69806	0.0129697	0.0492762	0.522977	0.405021	0.407688	0.357642	0.00735989	0.735102	0.839979	0.629282	0.00122302	0.260344
P625	0.00228591	0.274296	0.806997	0.400603	0.00489697	0.00505184	3.7e-07	0.241696	0.0628011	0.344628	0.0323578	0.215724	0.614489	0.89879	0.136717	0.227044	0.00318084	0.695966	0.285918	0.00068034	0.20231	0.00457775	0.19992	0.640241	0.0231776	6.83e-06	0.0168664
P626	0.00474053	0.123322	0.970461	0.816183	0.84407	0.0150923	0.0223068	0.24988	0.472742	0.0818017	0.622577	0.0909357	0.894065	0.542864	0.318429	0.33326	0.00097343	0.720537	0.33326	0.487422	0.129469	0.333723	0.131783	0.28596	0.873356	0.00477494	0.460884
P627	0.538244	0.618319	0.349468	0.950482	0.421272	0.81458	0.543371	0.0624257	0.0644849	0.603439	0.337837	0.395705	0.130738	0.356229	0.741667	0.0334866	0.377472	0.458742	0.888309	0.129419	0.658815	0.171418	0.452789	0.434833	0.637888	0.7873	0.946942
P628	0.00183276	0.00900656	0.977396	0.245182	0.00773668	0.0233258	6.9e-07	0.00020209	0.114802	0.0825357	0.255992	0.0170088	0.269186	0.221435	0.229473	0.0139797	0.00025258	0.632457	0.030759	0.540061	0.381664	0.141027	0.0208197	0.092067	0.712587	0.00286638	0.0121141
P629	0.0900355	0.123322	0.320125	0.994019	0.109953	0.273232	0.00748456	0.243704	0.708409	0.102327	0.0719756	0.645457	0.08547	0.542864	0.189254	0.852436	0.00830072	0.786497	0.748657	0.0195434	0.835722	0.172063	0.542864	0.144377	0.150198	0.00477494	0.0531568
P630	0.0440436	0.128051	0.789131	0.928501	0.552893	0.270168	0.387598	0.303839	0.82378	0.221702	0.42518	0.933725	0.502738	0.386612	0.355208	0.530079	0.0267688	0.506922	0.167418	0.553359	0.0344595	0.198324	0.386612	0.996714	0.601502	0.827462	0.726317
P631	0.435355	0.165183	0.215027	0.620806	0.468656	0.898226	0.535078	0.714613	0.366676	0.2386	0.40865	0.45828	0.769745	0.193786	0.0373753	0.0600137	0.253244	0.827929	0.560977	0.959688	0.916765	0.0162198	0.012683	0.147792	0.175836	0.831757	0.89863
P632	0.0328752	0.188049	0.559426	0.515841	0.0663878	0.364941	0.0352398	0.446316	0.106777	0.220401	0.0119486	0.0125745	0.0964461	0.858339	0.0639837	5.287e-05	0.00073331	0.816663	0.540932	0.0223505	0.94256	0.0244188	0.932765	0.376746	0.0353583	0.00560131	0.103172
P633	0.0760072	0.939115	0.316462	0.717576	0.903321	0.0049754	0.00450897	0.0374973	0.201939	0.670618	0.0791795	0.157723	0.128311	0.200402	0.539277	0.355409	0.193066	0.89164	0.929788	0.78135	0.391458	0.864509	0.858046	0.204707	0.286427	0.586385	0.203756
P634	0.54046	0.179373	0.351937	0.243115	0.298987	0.234914	0.490776	0.220651	0.230223	0.324183	0.587622	0.74198	0.464036	0.438933	0.303542	0.976592	0.905828	0.254155	0.75018	0.555968	0.978037	0.907283	0.308725	0.120643	0.979562	0.840019	0.975162
P635	0.0453509	0.0505586	0.0210975	0.49925	0.0144206	0.0761446	0.00123507	0.0459411	0.984629	0.01837	0.458919	0.0624485	0.708958	0.442729	0.110793	0.106254	0.011945	0.656881	0.996646	0.0613893	0.504911	0.0997184	0.0523902	0.425007	0.253142	0.00026827	0.00047508
P636	0.00090112	0.292513	0.25733	0.521984	0.00067713	0.0272272	2.449e-05	0.33246	0.0148627	0.629737	0.00278325	0.0133711	0.0268213	0.349615	0.671546	0.317194	0.00050506	0.543754	0.232323	0.00176939	0.231778	0.00048997	0.931238	0.486257	0.25954	9.386e-05	0.208322
P637	0.0705861	0.12148	0.636498	0.41421	0.689181	0.598932	0.481579	0.723057	0.434005	0.663686	0.384131	0.892857	0.725874	0.0428221	0.274127	0.523975	0.476612	0.0335579	0.251614	0.216116	0.538473	0.849678	0.512131	0.573833	0.0569775	0.391601	0.899836
P638	0.420593	0.268174	0.138707	0.735645	0.934982	0.903479	0.557443	0.518781	0.9787	0.0335772	0.135148	0.753788	0.339696	0.47365	0.148268	0.026876	0.410754	0.692593	0.865544	0.829798	0.897935	0.0608923	0.28442	0.522885	0.911748	0.183153	0.574782
P639	0.554737	0.395066	0.223624	0.535011	0.14797	0.335329	0.0420203	0.687874	0.356453	0.0594096	0.236282	0.774334	0.160298	0.735323	0.465135	0.591583	0.426934	0.284228	0.103879	0.139921	0.0257809	0.963552	0.735323	0.769013	0.25353	0.126328	0.778954
P640	0.799974	0.902227	0.345338	0.726463	0.752217	0.967882	0.925992	0.460939	0.545874	0.801021	0.559473	0.167178	0.936926	0.626046	0.890099	0.438864	0.966355	0.534696	0.438864	0.512305	0.80991	0.632372	0.626046	0.68747	0.798327	0.484274	0.655597
P641	0.00322014	0.0313656	0.770748	0.471903	0.61229	0.0594364	0.00275489	0.0188793	0.395195	0.139477	0.209637	0.403445	0.257236	0.403379	0.522	0.867374	0.000294	0.612343	0.40895	0.968969	0.712475	0.358031	0.131656	0.764688	0.4467	0.00045268	0.18184
P642	0.00981771	0.553561	0.111647	0.00743008	0.00076686	0.178663	7e-08	0.00245256	0.00016451	0.265961	0.612786	0.00337647	0.544851	0.27173	0.582667	0.659235	0.00440059	0.124652	0.00834101	0.0595434	0.904008	0.382595	0.27173	0.116047	0.0114482	5.711e-05	0.00044088
P643	0	0.0343187	0.295491	0.437414	0.0275342	0.00108547	6.85e-06	0.0105574	0.160841	0.00253442	0.140507	0.00971436	0.392343	0.252285	0.208591	0.218801	0	0.687451	0.0667728	0.294667	0.507142	0.022885	0.006934	0.860376	0.929526	2.9e-07	0.00046301
P644	0.92977	0.789982	0.158402	0.572357	0.681849	0.214147	0.5477	0.362775	0.306259	0.0621607	0.00235917	0.174739	0.146064	0.40275	0.110801	0.967707	0.21446	0.0140565	0.206827	0.279124	0.214363	0.690146	0.47365	0.132403	0.375334	0.839714	0.954324
P645	0.00031041	0.176761	0.277427	0.898293	0.683885	0.123715	0.403096	0.929976	0.224238	0.0304469	0.502789	0.621775	0.0617346	0.738699	0.817213	0.121133	0.00258659	0.408612	0.425279	0.720392	0.273612	0.154041	0.0726233	0.40667	0.408463	0.0142851	0.820816
P646	0.0529746	0.360294	0.801797	0.109039	0.00126036	0.395384	0.00013362	0.0188479	0.0471543	0.465139	0.188712	0.00025882	0.676179	0.805145	0.45535	0.072339	0.00343279	0.793814	0.100994	0.727273	0.683349	0.0866502	0.0626767	0.0842031	0.467388	3.1e-07	0.00018792
P647	0.32363	0.743104	0.494177	0.825546	0.00645081	0.502507	0.0246099	0.445446	0.0949994	0.509981	0.139237	0.306769	0.177308	0.860919	0.841492	0.00427017	0.467044	0.409645	0.415137	0.062341	0.105017	0.0362763	0.898614	0.256268	0.0582044	0.0212159	0.292242
P648	3e-08	0.0098836	0.455885	0.334782	0.22525	0.00113189	1.795e-05	0.00667944	0.276284	0.00761828	0.339074	0.00536852	0.449407	0.184317	0.0587296	0.34936	0	0.979389	0.465201	0.163085	0.259536	0.00190167	0.0241349	0.886004	0.745211	9.89e-06	6.776e-05
P649	0.443381	0.0865126	0.248668	0.111731	0.706441	0.71123	0.559839	0.941908	0.0863049	0.136031	0.761729	0.0980391	0.166964	0.241238	0.618832	0.606071	0.194218	0.380666	0.776211	0.259392	0.470294	0.0412208	0.0321278	0.31462	0.297496	0.420882	0.925796
P650	0.0362686	0.00651773	0.970689	0.436076	0.575194	0.135669	0.00822797	0.0952875	0.233414	0.440586	0.663433	0.254772	0.683224	0.132822	0.714226	0.769125	0.0705895	0.201368	0.646837	0.615939	0.0637878	0.220029	0.140592	0.294986	0.439025	0.396448	0.983017
P651	0.366741	0.432659	0.186542	0.764199	0.944843	0.0352905	0.303328	0.812952	0.757641	0.33846	0.595587	0.122785	0.803605	0.288386	0.952475	0.0864109	0.442979	0.424544	0.213629	0.753173	0.246187	0.363929	0.714233	0.597678	0.946647	0.658391	0.246121
P652	0.627543	0.17038	0.858584	0.49916	0.878595	0.895053	0.776824	0.249774	0.446309	0.413268	0.423927	0.541133	0.015002	0.610497	0.691297	0.529608	0.168679	0.259815	0.95069	0.957041	0.546333	0.236403	0.309081	0.160057	0.113195	0.884423	0.935316
P653	0.00014103	0.0505586	0.130713	0.730797	0.256326	0.0571798	0.0219386	0.0122782	0.673816	0.074907	0.830713	0.00855225	0.7875	0.442729	0.373963	0.372316	0.0001422	0.795002	0.221507	0.210219	0.951972	0.0452658	2.52e-06	0.615804	0.910187	0.00026827	0.00069375
P654	0.160341	0.583636	0.984407	0.903331	0.0787275	0.488986	0.315585	0.071127	0.161622	0.657904	0.617703	0.73697	0.0114973	0.542864	0.834695	0.138234	0.689721	0.263378	0.821798	0.495386	0.165627	0.919758	0.542864	0.0991889	0.135014	0.0146327	0.0280903
P655	0.0122652	0.0706044	0.0271901	0.357283	0.0479097	0.0321072	0.0009746	0.0418494	0.135417	0.00285636	0.262181	0.178093	0.417481	0.216424	0.188069	0.075578	0.0212402	0.804206	0.896907	0.263382	0.132591	0.0297285	0.224863	0.538374	0.327712	2.48e-06	0.00207217
P656	0.00439209	0.0171593	0.0964173	0.665176	0.531862	0.0366788	0.00207153	0.188942	0.496421	0.0870897	0.490865	0.13122	0.444348	0.252285	0.282896	0.385014	0.00426756	0.66044	0.434305	0.373658	0.733173	0.0616102	0.107388	0.989294	0.784551	0.00228	0.00811983
P657	0.262469	0.187954	0.304225	0.489823	0.211581	0.588435	0.00342203	0.0801457	0.14443	0.757334	0.444188	0.00059842	0.663804	0.247655	0.116435	0.283708	0.0438763	0.933947	0.796026	0.522612	0.468041	0.310202	0.80767	0.956595	0.710112	0.0592683	0.0178999
P658	0.0980673	0.756036	0.426512	0.212577	0.398534	0.0426795	0.059456	0.0305834	0.0870647	0.439797	0.584058	0.26316	0.694192	0.440544	0.529306	0.449859	0.0431734	0.859796	0.104475	0.750983	0.64198	0.633801	0.413633	0.485238	0.744722	0.00989877	0.27598
P659	0.0115841	0.108872	0.370879	0.530009	0.375776	0.184746	0.146635	0.269569	0.249563	0.00626441	0.654896	0.0945542	0.575081	1	0.0978573	0.631757	0.00016404	0.941472	0.44371	0.312325	0.21562	0.140073	0.155692	0.412912	0.451931	0.0445549	0.108292
P660	5.693e-05	0.73706	0.535335	0.63736	0.0675443	0.00467002	0.00036466	0.147102	0.156198	0.128766	0.033788	0.0457285	0.610694	0.233865	0.383962	0.366266	1.08e-06	0.50782	0.277597	0.522464	0.934862	0.0909803	0.212849	0.0695733	0.459889	0.00211245	0.00522251
P661	0.022991	0.592437	0.601551	0.900146	0.664503	0.256732	0.218417	0.706513	0.899145	0.183643	0.26521	0.677361	0.841783	0.439117	0.954376	0.367218	0.0526226	0.516935	0.615791	0.662692	0.80289	0.00392671	0.366165	0.535545	0.10978	0.060646	0.80063
P662	2.854e-05	0.749959	0.164258	0.465778	0.196215	0.0279263	0.00139965	0.199205	0.226039	0.421036	0.0577708	0.787597	0.144464	0.0310762	0.470575	0.192798	0.0152169	0.584808	0.825212	0.240392	0.0511378	0.864691	0.350284	0.847936	0.724019	0.00818127	0.390053
P663	0.480098	0.165925	0.273693	0.373067	0.807035	0.193127	0.627614	0.33891	0.0808041	0.0692379	0.278695	0.0165833	0.362132	0.853811	0.510501	0.595927	0.52311	0.423842	0.318668	0.195737	0.284921	0.161291	0.415735	0.478157	0.489902	0.468555	0.567595
P664	0.00146155	0.202389	0.684663	0.321372	0.328802	0.0562898	0.00101753	0.421165	0.0101307	0.279359	0.314494	0.00911333	0.88764	0.558372	0.113272	0.250824	0.00104582	0.175201	0.485885	0.198604	0.697444	0.16008	0.287142	0.439203	0.616798	0.00418364	0.231041
P665	0.168525	0.24813	0.326577	0.0102399	0.576594	0.0960454	0.136922	0.777751	0.00973022	0.278395	0.935487	0.177526	0.413393	0.245598	0.392038	0.728531	0.179126	0.375135	0.303214	0.562467	0.816154	0.890669	0.0879922	0.0894066	0.223928	0.353222	0.131722
P666	0.58726	0.551957	0.352442	0.664101	0.124887	0.900615	0.575571	0.898679	0.615234	0.493478	0.949583	0.489036	0.337509	0.812819	0.101919	0.0109752	0.0530819	0.0507142	0.707166	0.709097	0.492181	0.614449	0.812819	0.95044	0.417931	0.286867	0.0833332
P667	4.66e-06	0.0260691	0.0444245	0.378577	0.0700824	0.00534803	2.11e-06	0.0594906	0.619131	0.00341963	0.042605	0.00064358	0.429768	0.19992	0.00464189	0.20119	0	0.376573	0.992894	0.0351292	0.782254	0.00292907	0.0413477	0.853785	0.179792	1e-08	0.00047745
P668	0.472955	0.939733	0.857492	0.75818	0.381419	0.553706	0.007491	0.16825	0.486635	0.28683	0.231671	0.0189112	0.510774	0.774224	0.886014	0.193384	0.656869	0.746835	0.671716	0.030314	0.229854	0.0368183	0.586269	0.421263	0.0016933	0.0179223	0.510032
P669	0	0.00292819	0.0997931	0.908067	0.290518	0.00783009	0.00024503	0.0430812	0.815309	0.00087555	0.545458	0.00299196	0.837539	0.252285	0.0565592	0.305069	0	0.378188	0.378642	0.1695	0.660232	0.00304768	0.0105139	0.51715	0.768629	3.2e-07	0.00130551
P670	0.534577	0.572298	0.778087	0.83178	0.163657	0.2197	0.425314	0.871054	0.628268	0.161518	0.722559	0.445217	0.384315	0.0110983	0.839378	0.545482	0.316112	0.613594	0.736096	0.452285	0.466714	0.17744	0.19992	0.327181	0.668119	0.130624	0.0560032
P671	0.666203	0.874426	0.184565	0.402503	0.0189397	0.193559	0.080637	0.837185	0.346343	0.639041	0.0962628	0.524296	0.223966	0.599135	0.0241828	0.00243491	0.421205	0.724935	0.963311	0.188941	0.641477	0.0932368	0.313918	0.733704	0.195548	0.104588	0.126771
P672	0.0573933	0.155923	0.161464	0.500555	0.123133	0.404575	0.00090961	0.049752	0.134256	0.535883	0.221958	0.0356829	0.30222	0.0641817	0.456409	0.800807	0.0223482	0.989095	0.424865	0.365354	0.118029	0.376385	0.622437	0.0213509	0.725198	0.0010251	0.021207
P673	0.00028524	0.120969	0.593845	0.310462	0.112128	0.0235235	0.00080006	0.0798944	0.181714	0.260221	0.0113475	0.0131721	0.282023	0.818276	0.779258	0.968586	0.00365622	0.202189	0.780925	0.157615	0.30711	0.0163076	0.0641817	0.919068	0.850525	1.3e-07	0.110519
P674	0.0636276	0.292253	0.700751	0.442729	0.364711	0.209937	0.0273319	0.436041	0.371455	0.268035	0.384198	0.437847	0.408635	0.675955	0.565027	0.50688	0.05409	0.867215	0.50688	0.282122	0.660868	0.879196	0.675955	0.952835	0.731181	0.147328	0.184844
P675	0.00139175	0.123582	0.438805	0.311426	0.0220587	0.0182824	1.88e-06	0.131778	0.0387488	0.222681	0.0721528	0.219615	0.245992	0.838325	0.796875	0.136379	0.00320728	0.365846	0.135022	0.0645423	0.164305	0.00938127	0.366499	0.584774	0.104423	6.381e-05	0.0212526
P676	0.0406529	0.164329	0.755784	0.790776	0.70802	0.230178	0.160611	0.0972705	0.819439	0.4363	0.121175	0.22511	0.506012	0.582251	0.68978	0.381959	0.129087	0.480761	0.381959	0.235403	0.282554	0.941198	0.582251	0.409672	0.494693	0.0112898	0.0450317
P677	0.00610619	0.329369	0.109895	0.734774	0.0469409	0.00391667	0.00189677	0.165409	0.64027	0.126251	2.405e-05	0.0204253	0.240498	0.149162	0.0493186	0.721493	0.0014293	0.89301	0.256715	0.0580127	0.10831	6.85e-06	0.396674	0.376153	0.492838	0.00020436	0.0015136
P678	4.955e-05	0.391744	0.124251	0.30465	0.0813669	0.0576784	0.00061064	0.0972048	0.352067	0.0539572	0.368444	0.00205131	0.698543	0.658747	0.653634	0.520956	7.3e-06	0.50638	0.179269	0.224459	0.603448	0.00024446	0.0110477	0.698486	0.794196	2.2e-06	0.0145412
P679	0.243486	0.991493	0.325217	0.911152	0.697646	0.601317	0.675523	0.671433	0.0993907	0.440273	0.135425	0.781894	0.549188	0.0649889	0.813557	0.790623	0.358986	0.327058	0.072604	0.176861	0.87189	0.112702	0.250057	0.194834	0.174451	0.757983	0.74635
P680	0.372142	0.236175	0.442244	0.0348306	0.568341	0.535807	0.755752	0.70992	0.287942	0.434788	0.196372	0.44728	0.116123	0.772197	0.752202	0.116279	0.709866	0.298958	0.469809	0.846582	0.570558	0.833312	0.155692	0.705601	0.438257	0.769878	0.232988
P681	0.58726	0.551957	0.352442	0.664101	0.239001	0.754788	0.618835	0.157391	0.753593	0.382792	0.239001	0.450209	0.406365	0.812819	0.756017	0.707166	0.551957	0.223717	0.707166	0.575433	0.187111	0.753064	0.812819	0.533491	0.53375	0.748094	0.485718
P682	0.595646	0.180541	0.897856	0.999506	0.0894617	0.583212	0.0205734	0.0651038	0.310801	0.72226	0.51832	0.00731466	0.888837	0.427164	0.179637	0.701023	0.261528	0.623302	0.473981	0.574145	0.863414	0.0252866	0.435148	0.127682	0.526626	0.0561681	0.00167564
P683	0.00067046	0.0151663	0.2713	0.852739	0.0362026	0.0395653	6.81e-06	0.166129	0.261696	0.00559363	0.146141	0.0215	0.0886218	0.252285	0.00797221	0.00514541	4e-08	0.189373	0.313589	0.0468849	0.89199	0.00024762	0.257805	0.870934	0.170269	4.51e-06	0.0192201
P684	0.00086198	0.0356107	0.425496	0.404807	0.226521	0.0242933	0.00834328	0.0252086	0.267	0.1172	0.45946	0.0244729	0.466377	0.155692	0.125766	0.460813	5.41e-05	0.324543	0.0222686	0.369802	0.0571738	0.350322	0.0719687	0.117246	0.870468	0.00215871	0.00710852
P685	0.00140686	0.360885	0.722925	0.206799	0.0281204	0.0336067	6.29e-06	0.00837877	0.496936	0.442759	0.341938	0.00248586	0.103465	0.191041	0.270932	0.409259	0.00140823	0.979693	0.236066	0.0481469	0.118861	0.00275376	0.028355	0.10973	0.472068	1.59e-06	0.00273201
P686	0.00090186	0.400525	0.651597	0.263131	0.00284738	0.0123716	3e-07	0.00054055	0.114859	0.225095	0.0873438	0.00151894	0.141437	0.479356	0.723151	0.30764	8.064e-05	0.341288	0.600024	0.00329477	0.335531	0.00039931	0.107984	0.80657	0.0402008	3.687e-05	0.00138055
P687	0.0011069	0.149672	0.505659	0.565982	0.363838	0.147292	0.00321402	0.35545	0.163946	0.00985671	0.399154	0.372635	0.269487	0.19992	0.257472	0.442774	0.00192295	0.66865	0.328971	0.220088	0.0280524	0.142499	0.411082	0.843078	0.503601	0.00209999	0.0762991
P688	0.00362264	0.347157	0.621002	0.93883	0.0288965	0.0890941	1.224e-05	0.0305989	0.0513452	0.121426	0.00899967	0.0431914	0.10425	0.155692	0.272203	0.117191	0.0002174	0.313367	0.108828	0.534106	0.730568	0.00382003	0.371437	0.836606	0.171283	4e-07	0.00584316
P689	0.00503027	0.97727	0.120844	0.982481	0.036923	0.0281609	0.00042985	0.162157	0.0690338	0.438901	0.21694	0.0200187	0.67984	0.451297	0.408793	0.0683711	0.00518239	0.429553	0.043077	0.205819	0.576921	0.00041782	0.0172502	0.747408	0.583316	0.00245348	0.025434
P690	0.0586718	0.229216	0.414101	0.23445	0.879955	0.537163	0.0949473	0.336754	0.31153	0.351573	0.925202	0.671625	0.846382	0.250991	0.857926	0.958638	0.0230263	0.381518	0.205763	0.884171	0.538263	0.708587	0.19992	0.670581	0.492754	0.0581211	0.208403
P691	0.336801	0.292253	0.937987	0.532067	0.192298	0.190616	0.3344	0.458395	0.848325	0.639752	0.366705	0.900145	0.722962	0.675955	0.655552	0.50688	0.292253	0.0208064	0.227508	0.778093	0.853322	0.633163	0.675955	0.688391	0.836849	0.470169	0.875617
P692	0.245411	0.648104	0.370359	0.852879	0.720558	0.10669	0.963325	0.128197	0.355455	0.131307	0.37653	0.46542	0.0628626	0.292253	0.058105	0.0441497	0.014436	0.710502	0.837895	0.741029	0.172838	0.491293	0.292253	0.553431	0.512852	0.0829672	0.747293
P693	3.005e-05	0.0167518	0.156601	0.55688	0.0339682	0.0084578	0.00038365	0.0172268	0.301822	0.02192	0.284307	0.0113422	0.313879	0.252285	0.249256	0.140114	1.45e-06	0.215636	0.465637	0.289317	0.218943	0.00060383	0.00448021	0.47225	0.989556	0.00105525	0.0346455
P694	0.00495227	0.172479	0.45554	0.00616168	0.0148329	0.396373	1.142e-05	0.0336419	0.0435195	0.923597	0.193302	0.00381816	0.108506	0.37846	0.996499	0.204832	0.00868531	0.28377	0.245325	0.00146757	0.142952	0.107454	0.233865	0.0906251	0.515667	9.59e-06	0.0732521
P695	0.254933	0.719245	0.254975	0.598741	0.135411	0.940685	0.00970524	0.00678854	0.790151	0.895723	0.17853	0.0324277	0.0671045	0.19992	0.584069	0.869326	0.293727	0.94272	0.994148	0.0153328	0.0677528	0.0196387	0.112774	0.990312	0.475201	5.106e-05	0.0395851
P696	0.00159455	0.234155	0.885396	0.914188	0.0745294	0.0729726	0.00034537	0.00027628	0.432326	0.630997	0.130847	1.85e-05	0.28128	0.71468	0.397663	0.796051	0.00046785	0.495161	0.145657	0.459584	0.523121	0.121882	0.00798009	0.347409	0.631829	4.81e-06	0.00147041
P697	0.523099	0.943923	0.173554	0.817163	0.359873	0.541046	0.149306	0.0436871	0.934334	0.939195	0.955205	0.507349	0.401787	0.442729	0.889627	0.372316	0.335482	0.321514	0.221507	0.203941	0.200823	0.83273	0.442729	0.385682	0.65565	0.347022	0.687092
P698	0.262193	0.895783	0.316671	0.549535	0.227749	0.610003	0.149557	0.211156	0.472481	0.11739	0.384923	0.379162	0.566869	0.626046	0.184268	0.438864	0.218765	0.387648	0.438864	0.124748	0.463078	0.560392	0.626046	0.509185	0.0358717	0.03205	0.165015
P699	0.00539567	0.0794195	0.0418413	0.018919	0.0875461	0.0583247	0.597075	0.651552	0.174944	8.871e-05	0.640218	0.934498	0.278898	0.396033	0.252998	0.356631	0.00425836	0.31997	0.614448	0.600565	0.89846	0.00659549	0.142611	0.956722	0.741259	0.00099531	0.248254
P700	8.57e-06	0.624913	0.271396	0.74877	0.00924285	0.0247155	1.073e-05	0.0262567	0.513785	0.574823	0.00706209	0.002012	0.473576	0.853885	0.566069	0.690883	2.93e-06	0.861387	0.0228674	0.0835888	0.167423	0.0155047	0.071665	0.457666	0.343151	1e-08	0.0146536
P701	0.339646	0.436425	0.663165	0.177086	0.374404	0.883642	0.35168	0.587656	0.991025	0.424562	0.750209	0.110042	0.0292221	0.165279	0.488994	0.655937	0.146742	0.911238	0.10507	0.204078	0.482241	0.573355	0.632207	0.751995	0.148285	0.112548	0.580607
P702	0	0.00945571	0.173462	0.939574	0.0375219	0.00329524	0.00038557	0.0164443	0.718021	0.00194256	0.100982	0.00111689	0.275346	0.313918	0.0302882	0.168706	0	0.466239	0.107624	0.304929	0.515211	0.00861529	0.00072351	0.820189	0.716162	4.7e-07	0.00102786
P703	0.749104	0.613254	0.550096	0.262748	0.726522	0.144986	0.0337952	0.825237	0.619678	0.907717	0.485321	0.55559	0.923103	0.542864	0.756405	0.33326	0.474448	0.0512336	0.784997	0.863421	0.542197	0.821984	0.542864	0.259114	0.38775	0.0621852	0.59358
P704	0.299973	0.765632	0.351618	0.00941026	0.905711	0.826072	0.993727	0.538145	0.313076	0.959871	0.070099	0.257387	0.412577	0.582251	0.0746756	0.618224	0.684117	0.481137	0.0404501	0.283592	0.703896	0.367823	0.582251	0.0246906	0.613692	0.356145	0.64641
P705	4.797e-05	0.0927962	0.428467	0.692587	0.0339149	0.0127013	0.00037482	0.0305663	0.114993	0.114576	0.302017	0.00777359	0.0979981	0.216424	0.0561149	0.0387869	9.4e-07	0.930328	0.0474071	0.478654	0.519927	0.0131934	0.0157712	0.0750312	0.870263	9.17e-06	0.0006707
P706	0	0.0271792	0.320782	0.526462	0.0781057	0.00182327	1.595e-05	0.0222199	0.406387	0.00164452	0.103738	0.00130552	0.442155	0.27173	0.0681674	0.506197	0	0.812527	0.0786443	0.270662	0.773072	0.0189309	0.0172249	0.835695	0.803857	2e-08	0.00023829
P707	0.112706	0.77906	0.996272	0.561709	0.746687	0.253143	0.942536	0.523994	0.894203	0.718376	0.453379	0.529958	0.458295	0.233865	0.0501976	0.0540217	0.38121	0.490632	0.332419	0.466273	0.845208	0.659791	0.233865	0.192424	0.892296	0.45389	0.152348
P708	0.00104548	0.710167	0.978934	0.543368	0.0021411	0.00371634	1.082e-05	0.00070925	0.10976	0.69965	0.00340018	0.0234538	0.00887212	0.553347	0.567464	0.19358	0.00028167	0.719413	0.00814849	0.0709162	0.461088	0.0956003	0.169585	0.515529	0.261891	2.474e-05	0.0450154
P709	0	0.0381124	0.40145	0.537813	0.235603	0.00189437	4.152e-05	0.0155048	0.197987	0.00521425	0.0914663	0.00529854	0.803985	0.27173	0.328384	0.836371	0	0.44928	0.0786443	0.264648	0.983313	0.00982439	0.00336052	0.942038	0.976605	2e-08	0.00107377
P710	0	0.0135525	0.0291566	0.863955	0.0574995	0.00079162	7.82e-06	0.12637	0.931061	0.00075454	0.081711	0.00311655	0.434083	0.336801	0.022926	0.315027	0	0.920038	0.125135	0.0884754	0.447943	0.0172082	0.00160431	0.444786	0.887244	2.07e-06	0.00090534
P711	0.801984	0.623134	0.0453059	0.126902	0.0883401	0.13252	0.558893	0.622483	0.809937	0.487196	0.666273	0.80189	0.869422	0.279029	0.397388	0.272442	0.260434	0.465594	0.214566	0.116116	0.418325	0.487034	0.413984	0.724916	0.269764	0.622527	0.500346
P712	0.150712	0.438447	0.198817	0.820621	0.533123	0.20542	0.186959	0.77884	0.978782	0.731562	0.172455	0.919799	0.296413	0.233865	0.594996	0.406742	0.185332	0.184984	0.22088	0.372468	0.235355	0.462607	0.933366	0.509105	0.439431	0.529181	0.782752
P713	0.0269628	0.0715058	0.436815	0.120673	0.0115545	0.720266	0.457492	0.0813611	0.0112496	0.0100503	0.0894492	0.514266	0.255661	0.148697	0.00420179	0.76991	0.0012254	0.535247	0.48612	0.425794	0.0529952	0.544742	0.216424	0.512788	0.975665	0.901528	0.517567
P714	0.254175	0.954804	0.676962	0.516763	0.0312986	0.227932	0.0256669	0.132927	0.0904051	0.881219	0.342743	0.84273	0.150434	0.280915	0.57294	0.724445	0.736502	0.387162	0.82902	0.00074984	0.00258751	0.256626	0.50688	0.893279	0.0891211	0.312024	0.670552
P715	0	0.00945571	0.311395	0.651594	0.0660124	0.00250918	8.228e-05	0.0333652	0.545298	0.0015261	0.12063	0.00167935	0.552102	0.313918	0.0269395	0.249855	0	0.885345	0.107624	0.50571	0.611276	0.00915119	0.00815491	0.94687	0.644929	4.7e-07	0.00171715
P716	0.177967	0.025958	0.215533	0.788973	0.677155	0.10613	0.0270739	0.0940567	0.996969	0.0808787	0.438978	0.760101	0.0692716	0.169474	0.93356	0.0564123	0.0474255	0.626417	0.503687	0.438891	0.456431	0.0319323	0.233865	0.98699	0.927581	0.0586607	0.450864
P717	0.0681456	0.00458008	0.217989	0.432013	0.482959	0.644247	0.125805	0.00588281	0.397429	0.325799	0.156372	0.258112	0.949755	0.029609	0.282701	0.178237	0.0573338	0.471745	0.974904	0.968147	0.591595	0.285836	0.326807	0.417112	0.645386	0.0751987	0.0204761
P718	0.0006771	0.00610985	0.479921	0.246772	0.201849	0.03158	0.00136903	0.226066	0.33927	0.281639	0.538188	0.458186	0.145895	0.495833	0.507963	0.0222686	0.00016404	0.865364	0.147244	0.00606779	0.385308	0.0578477	0.155692	0.933359	0.369819	0.00075752	0.352283
P719	0.0135525	0.695143	0.839413	0.348389	0.025646	0.00257745	0.0015419	0.0399852	0.183972	0.528079	0.0127934	0.0640275	0.0863422	0.292253	0.766208	0.0921979	0.0198026	0.471515	0.242769	0.00135622	0.155957	0.00189626	0.292253	0.118935	0.0552803	0.0038474	0.211055
P720	0.0699638	0.32771	0.646209	0.550551	0.0202804	0.49293	0.152555	0.050224	0.120435	0.377675	0.360166	0.264103	0.43616	0.813161	0.398878	0.517286	0.138316	0.475537	0.0361309	0.0368821	0.347246	0.338937	0.107984	0.0992929	0.594492	0.0038365	0.0395585
P721	0.721698	0.0327575	0.0145207	0.262748	0.633778	0.361548	0.859672	0.721759	0.215139	0.00311732	0.847151	0.0812611	0.87218	0.00084338	0.0548947	0.33326	0.123322	0.0899492	0.33326	0.0629699	0.147418	0.515874	0.542864	0.991517	0.631493	0.709796	0.633426
P722	5.467e-05	0.203294	0.735727	0.0421431	0.0040082	0.0371426	1e-08	0.00481894	0.0406599	0.520481	0.0133759	2.839e-05	0.301679	0.862971	0.62617	0.361465	4.833e-05	0.366063	0.0794403	0.0110466	0.434014	0.0213467	0.097897	0.805668	0.0669277	0	0.00013892
P723	0.0440436	0.523049	0.781771	0.567077	0.122854	0.889318	0.0724526	0.311498	0.925913	0.58229	0.85238	0.827609	0.296212	0.386612	0.622844	0.177754	0.167503	0.603858	0.562252	0.0876093	0.167258	0.0982713	0.386612	0.125157	0.0171622	0.203458	0.135872
P724	0.00105816	0.538599	0.58515	0.9491	0.359408	0.0992887	0.0133554	0.381732	0.245144	0.361064	0.326293	0.224081	0.0608005	0.155692	0.614445	0.0590053	0.000323	0.613777	0.152827	0.0367686	0.167148	0.202007	0.157477	0.843684	0.645209	0.0326437	0.036736
P725	0.0387236	0.963801	0.749241	0.882879	0.828854	0.83487	0.679282	0.279286	0.806271	0.456952	0.205665	0.331543	0.340324	0.0753781	0.91722	0.190704	0.0375299	0.76707	0.772072	0.921348	0.433132	0.548282	0.0884785	0.812247	0.18025	0.585354	0.298344
P726	0.914766	0.615789	0.713117	0.487025	0.0333344	0.666158	0.881987	0.638524	0.204204	0.0652265	0.319362	0.403374	0.134669	0.57943	0.283066	0.120332	0.304525	0.773031	0.875513	0.0491648	0.311271	0.99355	0.405683	0.225665	0.575105	0.841802	0.41355
P727	0.894284	0.745687	0.0307869	0.993993	0.203481	0.67301	0.979502	0.299939	0.595069	0.859924	0.132844	0.126944	0.21221	0.264117	0.503544	0.0690023	0.56344	0.960763	0.511828	0.814165	0.881049	0.646691	0.0591937	0.157436	0.841214	0.388366	0.449006
P728	0.0249359	0.170594	0.0337494	0.475077	0.143052	0.164123	0.561456	0.493632	0.414154	0.00021814	0.7284	0.726773	0.849498	0.336801	0.18223	0.618399	0.0408927	0.358432	0.425875	0.0823532	0.543258	0.0452777	0.336801	0.863503	0.24829	0.00208152	0.879171
P729	0.0161832	0.0606974	0.0903964	0.325223	0.660972	0.23244	0.0083184	0.0273688	0.429906	0.0594615	0.149733	0.0281257	0.404327	0.800247	0.0209126	0.944376	0.0002616	0.816456	0.654645	0.176168	0.294527	0.263519	0.0232854	0.65641	0.957037	0.00014095	0.00344067
P730	0.00335715	0.0325633	0.345033	0.933882	0.0503913	0.200149	2.342e-05	0.020555	0.247291	0.137331	0.117871	0.00940172	0.174049	0.097897	0.0463352	0.146585	6.483e-05	0.412847	0.438539	0.0786171	0.34515	0.00177226	0.250981	0.43742	0.155995	0	0.00325257
P731	0.0147123	0.395066	0.513374	0.165689	0.496002	0.0841385	0.114749	0.225224	0.593889	0.139621	0.100944	0.0706614	0.258392	0.735323	0.0337966	0.591583	0.0277288	0.964696	0.591583	0.0660028	0.337226	0.692666	0.735323	0.156097	0.9332	0.126328	0.14797
P732	1.644e-05	0.240708	0.531089	0.759154	0.0257974	0.0129041	4.59e-06	0.060241	0.202989	0.0536663	0.00413444	0.0985645	0.128814	0.479115	0.257806	0.0178944	3.105e-05	0.600869	0.645224	0.00315475	0.521862	0.00071812	0.0797622	0.341929	0.363555	7.3e-07	0.0567814
P733	0.308985	0.615912	0.385035	0.241962	0.843168	0.484009	0.22769	0.546939	0.672044	0.949351	0.834469	0.782995	0.355899	0.313918	0.439739	0.593866	0.257743	0.307644	0.57636	0.391406	0.191078	0.0928862	0.313918	0.989094	0.677692	0.955244	0.869922
P734	0.00495227	0.0024584	0.319303	0.144983	0.0631435	0.146338	0.00715652	0.0912657	0.0773891	0.954514	0.0879595	0.0694063	0.218447	0.734911	0.991998	0.0564123	0.0124818	0.578778	0.249837	0.0100486	0.529823	0.0987491	0.233865	0.313734	0.841002	0.00312574	0.0645356
P735	0.489495	0.245499	0.129831	0.378319	0.678992	0.67273	0.544531	0.0287073	0.527831	0.337769	0.440631	0.974572	0.930623	0.932429	0.135401	0.64145	0.763426	0.556824	0.439328	0.872201	0.327249	0.885201	0.19992	0.106222	0.0494072	0.257677	0.857828
P736	1e-08	0.00945571	0.0913513	0.730677	0.0899189	0.00201382	2.834e-05	0.0161059	0.844069	0.0186608	0.381732	0.00034114	0.345653	0.313918	0.0142198	0.240094	0	0.578709	0.107624	0.0907724	0.305613	0.0158082	0.00231693	0.753896	0.648866	3e-06	0.00018561
P737	0.213571	0.894747	0.545086	0.66861	0.937639	0.171473	0.266921	0.808573	0.379999	0.579606	0.246861	0.405712	0.733117	0.477457	0.815168	0.0599437	0.371447	0.469173	0.585942	0.0291924	0.745561	0.263672	0.879095	0.911268	0.433708	0.171861	0.753608
P738	1.5e-07	0.0748334	0.0328068	0.518013	0.143863	0.0112403	4.996e-05	0.182764	0.520201	0.00600632	0.570977	0.00791227	0.966023	0.19992	0.155801	0.222143	0	0.661318	0.0396152	0.548037	0.950262	0.019517	0.0153764	0.517064	0.996127	4.21e-06	0.005467
P739	5.467e-05	0.192786	0.457832	0.689813	0.0300848	0.0219293	0	0.0434457	0.0750387	0.0409858	0.251458	0.0146626	0.752463	0.773374	0.420662	0.266731	4.464e-05	0.829747	0.247017	0.0309923	0.915504	0.0171623	0.097897	0.885267	0.0239176	4.91e-06	0.00370274
P740	0.5142	0.337379	0.349271	0.55284	0.0461316	0.469795	0.0102019	0.0204759	0.0016903	0.751874	0.228543	0.0660916	0.441213	0.645111	0.610847	0.0361584	0.409208	0.52549	0.0696272	0.0756429	0.107344	0.120032	0.901178	0.386848	0.3606	0.109279	0.0369511
P741	0.00195171	0.665693	0.566161	0.814447	0.00348148	0.0231984	1e-08	0.00057571	0.0969661	0.281415	0.204597	0.00436861	0.426943	0.306936	0.66566	0.263911	8.666e-05	0.888139	0.134305	0.0634152	0.656648	0.00804646	0.0572867	0.591769	0.0159003	3e-08	0.00033729
P742	0.00081557	0.0153467	0.0299947	0.443207	0.0309535	0.00507905	1.9e-07	0.00094186	0.520105	0.02464	0.117526	0.0354101	0.107968	0.0446192	0.238552	0.123609	1.469e-05	0.644993	0.0449458	0.0809606	0.107479	0.0418629	0.0797622	0.791464	0.04038	0	0.00011748
P743	0.00010189	0.313755	0.434252	0.563041	0.10791	0.0693456	0.00012456	0.0800506	0.190549	0.165923	0.0189042	0.0141944	0.105162	0.745868	0.750425	0.437179	7.93e-06	0.849619	0.260103	0.0391164	0.524416	0.00676816	0.0509544	0.536041	0.292126	1e-08	0.108847
P744	0.927112	0.796951	0.17263	0.311694	0.744515	0.833882	0.30409	0.0871141	0.096289	0.710793	0.900851	0.444833	0.32483	0.582251	0.722167	0.724633	0.389131	0.190776	0.381959	0.597029	0.347395	0.645312	0.582251	0.382254	0.60375	0.0295522	0.051221
P745	0.00702117	0.631996	0.69207	0.130928	0.0013561	8.344e-05	0.00467545	0.0995542	0.036712	0.794641	0.287065	0.435059	0.985119	0.646974	0.291863	0.857558	0.0130294	0.324083	0.354083	0.28272	0.0372513	0.00533373	0.252285	0.70493	0.0504798	0.00616315	0.0693145
P746	4.914e-05	0.948419	0.358574	0.850054	0.34035	0.081196	0.0323724	0.92189	0.951128	0.183888	0.00441768	0.0239937	0.136399	0.870475	0.104223	0.220552	0.00202809	0.823425	0.391471	0.0431459	0.805039	0.0958106	0.164998	0.021314	0.361219	0.0177537	0.206068
P747	0	0.0135525	0.0900838	0.998479	0.0523591	0.0011723	3.907e-05	0.112166	0.807513	0.00192922	0.163018	0.00166859	0.402158	0.336801	0.00639151	0.157771	0	0.697903	0.125135	0.11192	0.634041	0.00370291	0.00421492	0.527349	0.78908	2.07e-06	0.00259339
P748	0.0135525	0.00189179	0.831373	0.548544	0.014167	0.0334936	0.0727898	0.0441764	0.432293	0.858497	0.025888	0.00091743	0.239403	0.292253	0.73734	0.486739	0.00650175	0.318176	0.386406	0.0702679	0.617867	0.00595022	0.292253	0.743611	0.0928847	0.00023247	0.0730729
P749	0.644661	0.915052	0.757183	0.488408	0.895673	0.917198	0.0832976	0.557755	0.975247	0.407922	0.0412392	0.0077315	0.114192	0.233865	0.0613348	0.210221	0.120444	0.590407	0.234074	0.170994	0.204132	0.103135	0.233865	0.284404	0.00094919	0.167789	0.854932
P750	0.780772	0.00672042	0.377332	0.899357	0.332446	0.438229	0.79954	0.818808	0.809997	0.0348801	0.0731038	0.672124	0.131309	0.868925	0.224501	0.43079	0.873523	0.968209	0.808628	0.945379	0.429063	0.367903	0.169585	0.0988375	0.408315	0.843726	0.36354
P751	0.13048	0.338559	0.865994	0.330895	0.952688	0.927256	0.564345	0.107086	0.722852	0.701872	0.47955	0.507451	0.0170888	0.619468	0.152323	0.982069	0.13849	0.41763	0.978172	0.155028	0.516965	0.445133	0.692877	0.733915	0.25457	0.680499	0.62728
P752	1.12e-06	0.0191646	0.039302	0.925739	0.061489	0.0186675	0.00125853	0.0386577	0.472305	0.00121849	0.078809	0.0684577	0.204976	0.360994	0.526888	0.444021	2.03e-05	0.937981	0.681288	0.0107745	0.415351	0.0101696	0.00053746	0.576939	0.395697	8.06e-06	0.010899
P753	2e-06	0.0267688	0.136919	0.109493	0.762678	0.0158548	0.008099	0.478331	0.707783	0.00268875	0.308992	0.0780941	0.939629	0.386612	0.431557	0.660356	4e-08	0.469341	0.167418	0.17934	0.365712	0.180902	0.0195044	0.990889	0.638587	0.0005311	0.00420571
P754	0.0184854	0.489768	0.54486	0.023109	0.0879459	0.0335954	0	7.433e-05	0.00024071	0.0709809	0.00088132	0.0290968	0.0206679	0.846544	0.300874	0.107624	0.0380898	0.267886	0.140777	0.280422	0.515211	0.195498	0.313918	0.826576	0.318366	0.0168274	0.00379931
P755	0.215611	0.160117	0.171601	0.291038	0.398038	0.700186	0.376731	0.17953	0.625972	0.0128072	0.319006	0.329971	0.23864	0.413796	0.206768	0.125947	0.127454	0.855316	0.0525195	0.0283623	0.205536	0.145067	0.548898	0.131977	0.962803	0.0909211	0.58648
P756	0.0184854	0.0100936	0.511383	0.234431	0.0388294	9.545e-05	0.0661928	0.259822	0.404148	0.268093	0.591893	0.827355	0.839101	0.313918	0.838683	0.626207	0.0300768	0.785885	0.178272	0.0752259	0.0351288	0.250289	0.313918	0.268388	0.816317	0.00221707	0.0141742
P757	0.0379284	0.00275825	0.811809	0.885376	0.980418	0.129549	0.138619	0.858184	0.886908	0.251414	0.468321	0.551512	0.970165	0.823086	0.0132616	0.0786443	0.0149617	0.483525	0.678541	0.259565	0.215177	0.0461653	0.27173	0.185186	0.033813	0.0437674	0.312387
P758	0.802207	0.346868	0.0838795	0.670483	0.95655	0.450013	0.995113	0.62229	0.479872	0.032956	0.23074	0.179845	0.6593	0.744247	0.30911	0.813215	0.967971	0.973112	0.30019	0.728501	0.806739	0.56881	0.547145	0.331122	0.373134	0.690909	0.552767
P759	0.00074994	0.0655833	0.735916	0.276786	0.179693	0.0404519	0.00185482	0.0399677	0.0710714	0.00369526	0.213342	0.137872	0.485335	0.292253	0.161178	0.0556774	8.96e-06	0.578678	0.0921979	0.786584	0.234567	0.0665092	0.141598	0.616456	0.852741	6.682e-05	0.0467301
P760	0.0249359	0.168098	0.964528	0.417729	0.194974	0.283125	0.0126587	0.461408	0.29823	0.575322	0.336423	0.519083	0.886161	0.336801	0.562883	0.125135	0.0408927	0.385285	0.17751	0.0473367	0.415402	0.52582	0.336801	0.143968	0.969207	0.0184876	0.0197861
P761	0.00702117	0.19221	0.156601	0.810388	0.428579	0.0176267	0.074532	0.261287	0.443528	0.40748	0.549918	0.422152	0.895986	0.252285	0.579068	0.825204	0.0419024	0.978289	0.0105948	0.978087	0.541763	0.626678	0.252285	0.692133	0.827094	0.0108629	0.154785
P762	0.0135525	0.057347	0.369209	0.097825	0.192779	0.223548	0.00817423	0.146212	0.0310422	0.733567	0.449617	0.354924	0.614524	0.292253	0.418016	0.521475	0.16536	0.0209644	0.285554	0.193127	0.886647	0.197487	0.292253	0.452944	0.941828	0.0349886	0.37616
P763	0.272053	0.400888	0.523634	0.743114	0.215055	0.995948	0.089946	0.0628698	0.145977	0.502431	0.160055	0.150058	0.606645	0.549559	0.733965	0.192798	0.110596	0.273821	0.660925	0.511292	0.186624	0.317555	0.413796	0.43607	0.0325674	0.066127	0.0601722
P764	0.262193	0.693602	0.290715	0.370513	0.708605	0.786498	0.104714	0.74246	0.13274	0.500496	0.85184	0.730941	0.50045	0.626046	0.704863	0.506671	0.969895	0.849831	0.374261	0.602355	0.754859	0.606992	0.626046	0.301403	0.281213	0.296191	0.697183
P765	2e-08	0.0505586	0.0257818	0.115331	0.0879943	0.00757619	0.0303818	0.0612084	0.241967	0.0282539	0.455769	0.0493581	0.940001	0.442729	0.342603	0.894642	9.81e-06	0.859041	0.221507	0.520505	0.876929	0.190394	4.363e-05	0.575551	0.7506	0.00153965	0.00316818
P766	0.750298	0.450742	0.212341	0.961691	0.684669	0.616576	0.731142	0.515161	0.551458	0.415075	0.00847959	0.0263871	0.0328463	0.19992	0.0626774	0.811553	0.247911	0.738838	0.6146	0.16935	0.342705	0.902695	0.19992	0.134494	0.236278	0.265545	0.279288
P767	0.125135	0.815917	0.21206	0.867547	0.365817	0.0176827	0.00361469	0.599053	0.377778	0.649116	0.733874	0.88289	0.848996	0.406764	0.525454	0.291009	0.0921979	0.319239	0.101481	0.198876	0.340338	0.488705	0.50688	0.785622	0.00053254	0.110797	0.173743
P768	0.396356	0.325459	0.532242	0.288087	0.436501	0.128964	0.0951318	0.348384	0.284375	0.53159	0.798089	0.322899	0.0311998	0.292253	0.825901	0.246336	0.801581	0.220049	0.184525	0.641841	0.39461	0.509863	0.743067	0.597275	0.598553	0.297511	0.230313
P769	0.0703467	0.343731	0.761393	0.675492	0.0209983	0.683289	0.0518048	0.307469	0.169622	0.334291	0.00137423	0.00831554	0.00053057	0.900215	0.937304	0.649535	0.0572368	0.720489	0.304077	0.237517	0.405235	0.187578	0.927342	0.190644	0.356272	0.0288932	0.179286
P770	0.568731	0.358645	0.0553167	0.221507	0.180017	0.490276	0.225756	0.937497	0.0552516	0.0681264	0.199983	0.382282	0.464245	0.50688	0.669432	0.0918808	0.465574	0.88705	0.76044	0.229852	0.241542	0.147737	0.50688	0.239614	0.192491	0.16771	0.470131
P771	0.675199	0.514161	0.178845	0.647192	0.00484163	0.501513	0.0556904	0.845795	0.623894	0.824915	0.378375	0.243597	0.274932	0.582251	0.22111	0.0588471	0.404551	0.652577	0.381959	0.0959255	0.347395	0.296776	0.582251	0.920206	0.0919785	0.157458	0.124185
P772	0.437832	0.573575	0.0300551	0.535011	0.101655	0.88661	0.142314	0.93811	0.433085	0.201676	0.341692	0.638732	0.401632	0.735323	0.747049	0.591583	0.395066	0.284228	0.103879	0.487086	0.19973	0.890951	0.735323	0.427962	0.0728478	0.126328	0.675396
P773	0.216185	0.443459	0.227326	0.301178	0.746325	0.602691	0.89665	0.996862	0.56551	0.348908	0.0221006	0.197218	0.0036618	0.169585	0.392941	0.2115	0.639909	0.573764	0.518873	0.693419	0.788442	0.551324	0.169585	0.668161	0.439734	0.8624	0.874633
P774	0.914816	0.421414	0.356115	0.221507	0.045106	0.841554	0.0327583	0.813974	0.286643	0.0167996	0.130243	0.95963	0.145558	0.50688	0.091988	0.176638	0.248734	0.510021	0.969533	0.907251	0.342315	0.837917	0.50688	0.539655	0.0114413	0.0132069	0.146311
P775	0.679439	0.85173	0.336822	0.386329	0.740612	0.188513	0.715796	0.58144	0.444937	0.408414	0.366614	0.679834	0.176245	0.962862	0.574605	0.824871	0.87796	0.0392444	0.375027	0.970752	0.43266	0.427194	0.292253	0.884937	0.814234	0.982004	0.442067
P776	0.202982	0.6022	0.773819	0.32267	0.853874	0.362138	0.90084	0.598998	0.326303	0.154164	0.731477	0.734429	0.124341	0.386612	0.142271	0.653798	0.977932	0.66208	0.127662	0.340054	0.0740221	0.548413	0.386612	0.946569	0.488303	0.569128	0.716461
P777	0.160341	0.156637	0.759097	0.262748	0.0280903	0.825515	0.0565886	0.27079	0.00539948	0.806134	0.426382	0.95331	0.683862	0.275858	0.311819	0.64252	0.636432	0.0512336	0.64312	0.463346	0.553874	0.466614	0.542864	0.179474	0.347253	0.721746	0.475772
P778	0.00548995	0.724201	0.660157	0.922234	0.0950518	0.00298818	0.00111093	0.0396378	0.160019	0.400598	0.0587613	0.0879807	0.13453	0.357634	0.671259	0.14237	0.00353163	0.323894	0.0169984	0.644772	0.959617	0.15062	0.142611	0.968685	0.647384	0.00038605	0.0344952
P779	0.00344163	0.562276	0.859858	0.135795	0.00543575	0.0800726	0.00590137	0.281224	0.213977	0.548083	0.201595	0.121521	0.608275	0.645512	0.359013	0.399836	0.0012254	0.324649	0.621068	0.00180423	0.927725	0.00755857	0.216424	0.510992	0.209098	0.00040834	0.00177216
P780	0.58726	0.551957	0.352442	0.664101	0.239001	0.754788	0.618835	0.157391	0.753593	0.382792	0.239001	0.450209	0.406365	0.812819	0.756017	0.707166	0.551957	0.223717	0.707166	0.575433	0.187111	0.753064	0.812819	0.533491	0.53375	0.748094	0.485718
P781	0.00702117	0.193564	0.848174	0.0892865	0.0204849	0.00116014	0.00039899	0.00130068	0.00405151	0.111065	0.278111	0.0750906	0.443366	0.252285	0.372965	0.871002	0.0838916	0.0811462	0.0993957	0.0980505	0.337589	0.13985	0.252285	0.800439	0.41261	0.0174972	0.0485061
P782	0.0577706	0.995652	0.241777	0.215786	0.0931216	0.233059	0.00064905	0.485263	0.00111334	0.58746	0.0722864	0.259935	0.488781	0.630927	0.646756	0.192798	0.141702	0.014789	0.0387527	0.180686	0.750015	0.691121	0.413796	0.424374	0.972717	0.0167197	0.0285081
P783	0.0332954	0.0021978	0.144519	0.369567	0.720807	0.801847	0.969992	0.847109	0.0210167	0.0946322	0.187508	0.841824	0.712603	0.580794	0.00865464	0.76374	0.0191646	0.122351	0.144973	0.732521	0.61286	0.206121	0.360994	0.330947	0.724448	0.0619575	0.135739
P784	0.00803899	0.906182	0.671412	0.505468	0.0238008	0.846598	0.0448541	0.408121	0.685051	0.911657	0.00953542	0.00223198	0.0493671	0.792662	0.759118	0.00614416	0.00047748	0.396001	0.411393	0.0164824	0.627501	0.0984127	0.273281	0.233446	0.0868515	0.00043884	0.0311654
P785	0.0454636	0.395066	0.483776	0.535011	0.524636	0.202224	0.19082	0.420618	0.631744	0.0534828	0.704476	0.223675	0.582266	0.735323	0.818914	0.1881	0.023779	0.284228	0.591583	0.67715	0.294532	0.62866	0.00732312	0.425122	0.997428	0.126328	0.161174
P786	7.4e-07	0.0369736	0.0330726	0.792936	0.0974516	0.00393239	0.00110101	0.227961	0.54734	0.0514657	0.152212	0.0145189	0.225927	0.413796	0.00813761	0.370982	6e-08	0.472965	0.192798	0.00656718	0.563914	0.00722922	0.0135675	0.514453	0.907178	9.054e-05	0.00503412
P787	0.00452877	0.0921979	0.504365	0.221507	0.131271	0.295213	0.0717052	0.160545	0.929141	0.0167325	0.437341	0.0438309	0.364139	0.50688	0.687321	0.223264	3.091e-05	0.681898	0.291009	0.574964	0.677114	0.146948	0.00174817	0.718527	0.332582	0.00193198	0.0201072
P788	9.371e-05	0.0455686	0.0302801	0.755583	0.250427	0.0020887	0.00054833	0.0545684	0.620268	0.0358767	0.472133	0.475159	0.0914952	0.937161	0.718897	0.169868	0.00048518	0.410714	0.24287	0.0609942	0.139189	0.0610589	0.0797622	0.350621	0.371233	8.218e-05	0.17776
P789	0.7482	0.847748	0.375758	0.396356	0.138878	0.420598	0.708836	0.505522	0.883709	0.997677	0.0692612	0.402593	0.998269	0.5383	0.221048	0.973932	0.831256	0.423242	0.65459	0.918597	0.169004	0.029297	0.356735	0.976549	0.266132	0.920682	0.596603
P790	0.0530442	0.0685288	0.684647	0.186506	0.426272	0.103523	0.0423685	0.268909	0.183315	0.0876221	0.720521	0.0338254	0.173942	0.47365	0.0572985	0.149038	0.00020747	0.211304	0.254036	0.810554	0.219733	0.141228	0.441923	0.368103	0.535214	0.00215699	0.12218
P791	0.175215	0.997221	0.74276	0.00861429	0.00810045	0.584182	0.00599193	0.439992	0.112932	0.896738	0.696548	0.826279	0.795027	0.313918	0.118549	0.603325	0.0692235	0.418742	0.228962	0.864888	0.816576	0.51863	0.313918	0.256536	0.667199	0.0154883	0.74608
P792	0.0972712	0.0401114	0.57979	0.0976453	0.0150035	0.0272638	0.0167968	0.160157	0.185652	0.494809	0.437815	0.297253	0.826711	0.47365	0.908368	0.254036	0.204773	0.813344	0.270297	0.0224731	0.35177	0.192847	0.47365	0.585148	0.219491	0.165933	0.0165127
P793	0.160341	0.766103	0.796202	0.976078	0.476385	0.809662	0.085954	0.277418	0.152785	0.508545	0.633778	0.679523	0.789937	0.542864	0.732982	0.149065	0.123322	0.298964	0.33326	0.453312	0.616034	0.40258	0.542864	0.0207972	0.419036	0.134151	0.0971831
P794	0.622715	0.98502	0.488254	0.867083	0.683953	0.337863	0.440179	0.852694	0.727484	0.538312	0.00974184	0.0705342	0.345596	0.965068	0.17624	0.303179	0.707386	0.400046	0.356756	0.0311704	0.685115	0.373163	0.233865	0.195955	0.120495	0.0910381	0.238308
P795	0.00281818	0.555936	0.960382	0.311694	0.788145	0.466725	0.1219	0.848952	0.0701811	0.211753	0.518424	0.70126	0.85675	0.582251	0.38198	0.0804758	0.00154	0.444687	0.381959	0.635533	0.240974	0.162043	0.207705	0.0285293	0.917344	0.166655	0.314681
P796	0.00104548	0.0541693	0.413341	0.938639	0.00151083	0.00341401	0.00043582	0.0816534	0.0965423	0.293222	0.245018	0.222244	0.107434	0.169585	0.663625	0.118783	0.00286965	0.739755	0.0187837	0.114912	0.922634	0.0439838	0.169585	0.854902	0.275409	0.00020211	0.230403
P797	0.900631	0.341207	0.323612	0.816237	0.299485	0.987194	0.0623574	0.319542	0.546003	0.286455	0.0529805	0.370559	0.210382	0.336801	0.0725532	0.681146	0.255369	0.333567	0.6977	0.529193	0.901249	0.0597793	0.336801	0.45263	0.250053	8.977e-05	0.213936
P798	0.00981771	0.037663	0.988373	0.192676	0.185914	0.00370839	0.00045966	0.0869474	0.101356	0.572826	0.151218	0.52529	0.93665	0.438569	0.444915	0.351215	0.0173953	0.597867	0.300703	0.511497	0.0167091	0.108409	0.27173	0.258594	0.541169	0.00586464	0.0002198
P799	0.00158315	0.169856	0.243674	0.294361	0.0388075	0.00080776	0.00437138	0.0179632	0.00314638	0.831103	0.145439	0.155872	0.191213	0.575924	0.183193	0.357223	0.00169192	0.444658	0.498903	0.378615	0.346904	0.0151951	0.184317	0.823298	0.407585	0.00579247	0.122087
P800	0.0296919	0.715071	0.18314	0.603568	0.0307335	0.277765	0.129628	0.608036	0.781381	0.12519	0.0152279	0.626456	0.0820867	0.760143	0.79596	0.344738	0.0177872	0.417933	0.941193	0.63082	0.53181	0.241932	0.088561	0.0533711	0.0612469	0.00730439	0.253572
P801	0.00820755	0.56397	0.834471	0.201188	0.11792	0.0640701	0.00629579	0.184472	0.101726	0.316687	0.957146	0.503779	0.423442	0.184317	0.404854	0.90319	0.00781354	0.101587	0.111889	0.356887	0.657969	0.171957	0.184317	0.900561	0.581362	0.0060036	0.255249
P802	0.0775525	0.292253	0.923931	0.442729	0.850099	0.779097	0.272145	0.70845	0.287723	0.377818	0.187498	0.197164	0.020291	0.675955	0.186862	0.17928	0.0549876	0.263254	0.50688	0.696825	0.946358	0.154114	0.675955	0.888474	0.808408	0.142836	0.68926
P803	0.493277	0.890387	0.717579	0.683716	0.386362	0.977376	0.288272	0.00069482	0.625528	0.90979	0.780236	0.149447	0.795521	0.50688	0.0394414	0.93911	0.685196	0.0617336	0.291009	0.864098	0.112162	0.492903	0.00662764	0.633182	0.374274	0.04784	0.0420389
P804	0.0332954	0.405283	0.296539	0.00482117	0.227632	0.111391	0.0123434	0.0370187	0.0752221	0.125928	0.202847	0.392878	0.121197	0.871486	0.181583	0.725875	0.181868	0.143144	0.638652	0.0750635	0.0578954	0.464531	0.360994	0.907214	0.494613	0.108143	0.125103
P805	0.635506	0.603817	0.93614	0.499535	0.277627	0.913135	0.0830441	0.129998	0.886661	0.599963	0.126799	0.19813	0.22719	0.360994	0.195027	0.582433	0.962489	0.680552	0.604564	0.155052	0.044156	0.64308	0.360994	0.671419	0.0639935	0.00063091	0.0151984
P806	0.343618	0.37405	0.699879	0.496383	0.859389	0.465661	0.528804	0.158494	0.359083	0.4573	0.203825	0.723791	0.591803	0.252285	0.289345	0.238262	0.83427	0.518023	0.996701	0.695167	0.631868	0.776711	0.252285	0.423339	0.332627	0.948167	0.408019
P807	0.0287584	0.489774	0.0829047	0.401974	0.172463	0.231366	0.0756447	0.59668	0.551474	0.0866298	0.952728	0.245757	0.883868	0.407538	0.335488	0.0474071	0.00634106	0.0570936	0.357329	0.241015	0.570059	0.0257113	0.216424	0.841737	0.115607	0.0923226	0.389571
P808	0.262193	0.218765	0.0844329	0.590713	0.0768275	0.940456	0.092416	0.803535	0.55532	0.246874	0.728081	0.828171	0.250822	0.626046	0.136174	0.0320045	0.895783	0.928547	0.439462	0.0965828	0.710963	0.11528	0.626046	0.0525742	0.137756	0.0257542	0.0897726
P809	0.0757971	0.630363	0.622933	0.739248	0.0111515	0.0874822	0.00051043	0.079564	0.135632	0.747887	0.0063061	0.0100657	0.0947897	0.631652	0.540395	0.0596497	0.0455245	0.985662	0.577306	0.0624172	0.125185	0.112643	0.552653	0.137398	0.00101369	0.00140513	0.14856
P810	0.316724	0.035497	0.152945	0.0505586	0.439431	0.347785	0.190268	0.826426	0.0307905	0.0850604	0.111267	0.75746	0.264824	0.641142	0.40689	0.892661	0.324718	0.821698	0.373775	0.79455	0.590836	0.58883	0.292253	0.880067	0.164169	0.394207	0.717762
P811	0.00286684	0.0579949	0.0415035	0.465987	0.0807353	0.199824	0.00083154	0.0264697	0.239825	0.00770579	0.0138069	0.0264932	0.0134136	0.292253	0.192007	0.212787	0.00159219	0.787009	0.466283	0.033837	0.161032	0.0420456	0.193837	0.52519	0.472464	5e-07	0.00241468
P812	0.375788	0.67656	0.416216	0.837591	0.630748	0.172258	0.209434	0.882981	0.681558	0.980377	0.404181	0.0216391	0.302548	0.360994	0.0599552	0.831294	0.0529211	0.315444	0.144973	0.191313	0.678394	0.596422	0.507269	0.937107	0.158255	0.0372995	0.189665
P813	0	0.124604	0.105977	0.996837	0.0228262	0.00337535	3.443e-05	0.0119872	0.460934	0.00809822	0.0281154	0.00368069	0.629433	0.252285	0.26831	0.464958	1.1e-07	0.399213	0.0667728	0.292281	0.960158	0.0301224	0.00189845	0.917935	0.852065	0	2.908e-05
P814	0.0201067	0.395066	0.27605	0.535011	0.933308	0.816729	0.281107	0.566997	0.537465	0.0264821	0.400191	0.122381	0.812561	0.735323	0.88974	0.1881	0.0083658	0.284228	0.591583	0.474956	0.71829	0.221373	0.00732312	0.772718	0.823932	0.126328	0.427638
P815	0.262193	0.218765	0.246668	0.481667	0.84628	0.264711	0.954631	0.2304	0.363922	0.520765	0.874147	0.630197	0.160635	0.626046	0.312879	0.47617	0.218765	0.139627	0.438864	0.308204	0.404148	0.930675	0.626046	0.194418	0.168269	0.0687564	0.178723
P816	0.800634	0.411191	0.776677	0.0596367	0.143759	0.295955	0.0715063	0.299759	0.00660907	0.93037	0.00770475	0.191132	0.0166601	0.169585	0.75694	0.137943	0.892536	0.0259187	0.358536	0.349656	0.988189	0.0388024	0.509331	0.901496	0.188739	0.0422893	0.624306
P817	0.235285	0.152553	0.186461	0.531121	0.562108	0.0384884	0.540735	0.685437	0.682421	0.519271	0.0992781	0.233099	0.204691	0.27173	0.671128	0.293817	0.484304	0.654573	0.432146	0.359499	0.801006	0.248483	0.27173	0.905007	0.543774	0.160644	0.476559
P818	0.320012	0.350165	0.13063	0.413075	0.396845	0.172244	0.33642	0.3167	0.0770277	0.42367	0.817922	0.379986	0.462758	0.575924	0.0086344	0.883787	0.710929	0.222746	0.243754	0.43	0.69947	0.665599	0.927342	0.0264885	0.693452	0.570181	0.775123
P819	0.0016314	0.0053815	0.528577	0.433824	0.109287	0.0258491	0.0110395	0.167302	0.118004	0.0817897	0.98202	0.0442404	0.791675	0.247207	0.403504	0.139516	0.00104567	0.560229	0.0541617	0.426793	0.562364	0.0514007	0.0201413	0.0806071	0.535614	0.002809	0.00021797
P820	0.0224003	0.520589	0.361393	0.3655	0.453379	0.470331	0.0537107	0.889124	0.586392	0.184396	0.981929	0.939428	0.806843	0.561499	0.0396005	0.845926	0.00191304	0.395195	0.242645	0.269185	0.871383	0.0189667	0.233865	0.973482	0.608579	0.00980666	0.112769
P821	0.0003637	0.0355566	0.475518	0.49437	0.565158	0.101132	0.0004931	0.0265916	0.483961	0.0867259	0.141073	0.0111321	0.253549	0.492826	0.499476	0.841671	0.00017277	0.721226	0.441518	0.603096	0.674702	0.532958	0.0641817	0.438278	0.516989	0.00064849	0.022919
P822	0.00235413	0.976554	0.326386	0.0109421	0.00073844	0.835217	7.489e-05	0.095145	0.00238116	0.444757	0.0841535	0.00384501	0.0578297	0.793797	0.380537	0.211386	0.00483105	0.0806215	0.391213	0.0143566	0.482815	0.105082	0.19992	0.815139	0.622702	7.15e-05	0.0795673
P823	0.125135	0.0921979	0.616041	0.787282	0.0005375	0.983167	0.0504357	0.716492	0.062174	0.445648	0.39857	0.138111	0.962364	0.226607	0.22664	0.76044	0.0921979	0.0125479	0.147791	0.87619	0.78879	0.443508	0.50688	0.509902	0.224171	0.0136469	0.471983
P824	0.0440436	0.276693	0.409809	0.449018	0.22874	0.014461	0.0219428	0.0306418	0.176238	0.489249	0.874846	0.926213	0.66912	0.386612	0.832253	0.51256	0.429253	0.271205	0.16028	0.137157	0.612256	0.453373	0.386612	0.801157	0.768317	0.568469	0.0822701
P825	0.945498	0.733117	0.838522	0.695234	0.759833	0.409873	0.559853	0.976145	0.703918	0.868962	0.0867667	0.145218	0.648785	0.107984	0.872276	0.638588	0.731904	0.475437	0.11772	0.207356	0.719825	0.167598	0.354199	0.463647	0.415228	0.515831	0.597192
