# Supplementary material for: Illumina MiSeq Phylogenetic Amplicon Sequencing Shows a Large Reduction of an Uncharacterised Succinivibrionaceae and an Increase of the Methanobrevibacter gottschalkii Clade in Feed Restricted Cattle
Source: PLoS One. 2015 Jul 30;10(7):e0133234. doi: 10.1371/journal.pone.0133234 (PMC4520551; doi:10.1371/journal.pone.0133234)
Supplement: S6 Table — Methanobacteria/Microbia OTUs = M1-M20, Thermoplasmata OTUs = T21-T27 and R. flavefaciens OTUs = F2660-F2685. (XLSX) [file pone.0133234.s006.xlsx]

## Sheet: Liquid Spearman rho value
O.T.U#	M1	M2	M3	M4	M5	M6	M7	M8	M9	M10	M11	M12	M13	M15	M16	M17	M18	M19	T20	T21	T22	T23	T24	T25	T26	T27
F2660	0.165967	0.0278317	0.0955554	-0.246347	0.284798	0.350679	0.569597	-0.0504062	0.455264	0.254579	0.176339	0.0683901	-0.292313	0.0689866	0.129991	0.373627	-0.170425	-0.386113	-0.0665446	-0.449397	0.166387	0.246628	-0.169134	0.0140415	-0.500329	0.113777
F2661	0.639694	-0.316058	0.166525	-0.035264	0.242833	0.513169	0.459583	0.123619	0.177766	0.175279	0.379479	0.176844	-0.21977	-0.100639	-0.0864055	0.497246	-0.254841	-0.419711	0.0385781	-0.288541	0.0146787	0.120615	-0.160627	0.0771562	-0.351111	0.285676
F2662	-0.0553329	0.0551858	0.00559631	-0.0747096	0.37689	0.22634	0.287253	0.28479	0.0637026	0.305053	0.115608	0.333006	-0.198076	0.140251	-0.0750422	0.213209	-0.119285	-0.146348	-0.105572	0.0689082	0.236958	0.0300808	-0.423272	0.241526	-0.204219	0.240536
F2663	0.692862	-0.224023	0.120048	0.0219732	0.337229	0.359159	0.58278	0.480519	0.509193	0.13922	-0.00995629	-0.0490703	-0.146643	0.0220161	-0.0124534	0.598214	0.00327337	-0.405534	-0.118499	-0.238329	0.0838684	0.307855	-0.2053	-0.315996	-0.521259	0.396898
F2664	-0.187546	0.405888	0.00373087	0.177039	-0.195619	-0.0649793	-0.0893062	-0.238309	0.186052	-0.211757	-0.0168525	0.132461	0.0615574	-0.031917	0.0118044	-0.112627	0.273217	0.169274	-0.332366	0.259058	0.0219463	-0.0553824	0.0561702	0.264543	0.274827	-0.161734
F2665	-0.224197	0.0639916	-0.110964	-0.133842	-0.041887	-0.263455	0.0873571	0.0680762	-0.0324724	0.157243	0.215499	0.112177	-0.117395	-0.172026	0.212314	-0.269416	-0.224197	0.145691	-0.0389747	-0.237244	0.41669	-0.099721	0.272864	-0.212345	0.253451	0.243511
F2666	0.140678	0.13027	0.109848	-0.0153216	-0.274838	0.101802	-0.0403177	0.1575	0.356919	-0.462431	0.227435	0.365641	0.120554	0.206475	0.116644	0.11274	0.168813	0.316353	0.00855223	0.215977	-0.201925	-0.223276	0.195509	0.0623091	0.139888	0.21947
F2667	-0.350718	0.242672	0.0720531	-0.0427004	-0.334934	-0.262635	-0.200131	-0.316597	0.170427	-0.578839	-0.0534274	0.291484	0.251015	0.269714	0.532081	-0.256684	0.111372	0.528152	-0.0899048	0.203241	-0.0665151	-0.121843	0.087455	0.0437208	0.310892	-0.378714
F2668	-0.216327	-0.0370167	0.0940425	0.0983475	-0.0307787	0.125057	-0.494759	0.131559	-0.247285	-0.263674	0.58676	0.235355	0.138978	-0.211334	0.0406981	-0.219964	0.0177499	0.178608	0.0207384	-0.136302	0.108646	-0.146551	0.254825	-0.115542	0.351188	-0.104292
F2670	-0.276737	0.140752	-0.00456247	0.0358804	-0.12429	0.0177936	-0.580064	0.0337623	-0.309629	-0.30084	0.476808	0.152836	0.0779495	-0.0607986	-0.0228907	-0.297594	0.164423	0.260041	0.102682	-0.234673	0.18918	-0.167083	0.381964	-0.222478	0.496242	-0.125898
F2671	-0.279879	0.0838504	-0.0155803	0.155944	0.0438561	0.0711029	-0.514507	0.077335	-0.298501	-0.184551	0.512857	0.114856	0.194496	-0.322126	-0.186684	-0.336328	0.0995754	0.274853	0.0100664	-0.227368	0.0671198	-0.124488	0.356294	0.0162181	0.474295	-0.140703
F2672	0.615174	-0.393663	-0.0371089	-0.188701	0.0478755	0.284192	0.331502	0.0587557	0.224615	0.239927	0.0576623	0.144156	-0.29725	-0.144689	0.338817	0.384635	0.0833263	-0.363138	-0.255189	-0.0525111	0.110212	0.531843	-0.339795	0.020757	-0.422369	0.149806
F2673	-0.145957	0.275345	0.353135	-0.224252	-0.0307894	0.0962682	0.261659	0.0152843	0.444658	-0.103583	0.0959552	0.317048	-0.196695	0.313451	0.535766	0.216866	-0.0855	-0.118891	0.103583	-0.0810772	0.0382864	-0.167083	-0.0364847	-0.224279	-0.249941	0.241071
F2674	-0.174321	-0.0676862	-0.128198	0.260291	-0.242379	-0.384907	-0.392872	-0.0358706	-0.323946	-0.0708154	-0.18801	-0.0216415	0.197226	-0.267867	-0.0693651	-0.46177	0.153915	0.518813	0.0104684	0.267908	-0.161669	-0.0547166	0.280534	0.261709	0.555426	-0.301569
F2675	-0.245328	0.144813	-0.0241355	0.0892258	-0.250272	-0.090044	0.0158827	0.0241355	0.233474	-0.256567	0.233474	0.304589	0.0770754	0.0781918	0.328114	0.064145	0.0981312	0.214791	-0.0690287	-0.0500993	0.41729	0.0839382	0.074538	-0.00122175	0.213617	-0.223265
F2676	0.11482	-0.324147	-0.0445201	-0.196695	0.0704931	0.152069	0.304163	0.2211	0.472878	0.137268	-0.247285	0.02603	-0.172524	0.197509	0.294383	0.48811	-0.042156	-0.163632	-0.0434519	-0.283468	-0.00888924	0.170976	-0.244948	-0.206396	-0.373537	0.0593033
F2677	-0.11007	-0.105458	-0.0771187	0.0392413	0.118181	-0.117382	0.0837665	-0.0554388	0.15915	0.199633	-0.241075	-0.103749	0.110774	-0.109447	0.182266	-0.00810655	0.0559793	-0.193352	-0.0116173	0.0437242	-0.0420425	0.0588107	0.00657392	-0.140936	-0.282504	-0.348816
F2678	0.749216	-0.337746	0.103973	-0.27809	0.329727	0.46488	0.692434	0.295757	0.455924	0.360526	0.238078	0.0191474	-0.373537	-0.0325658	-0.0573888	0.69885	-0.132845	-0.615632	-0.0677632	-0.360581	0.147884	0.474295	-0.296756	-0.0786184	-0.723148	0.400525
F2679	-0.318217	0.369852	0.194512	0.126101	-0.054934	-0.2075	-0.163614	0.119058	-0.036877	0.002442	-0.13678	-0.0931983	0.119493	-0.0531136	-0.109025	-0.0110081	0.108016	-0.106301	-0.0042735	-0.0696077	0.239353	-0.135338	0.41093	-0.382784	0.19079	-0.0126419
F2680	-0.242092	0.0936999	0.00742178	-0.157626	0.0745753	-0.196059	-0.175824	-0.11813	-0.0476049	-0.25641	0.105267	-0.10929	0.0256761	0.130037	0.0419327	-0.415717	-0.0315474	0.170082	0.0323565	-0.117539	-0.114792	-0.239917	0.00335827	-0.028083	0.127632	-0.0720587
F2681	-0.224197	0.0830529	-0.0156575	-0.133842	0.20403	-0.0537802	-0.383027	0.296812	-0.239115	-0.0120956	0.401477	0.0295204	-0.117395	-0.11558	-0.149543	-0.269416	-0.0445375	0.166827	-0.189498	-0.0302436	0.0779613	-0.099721	0.197592	-0.0806373	0.334555	-0.0292213
F2682	0.344302	-0.044357	0.364782	-0.246651	0.329692	0.220855	0.33558	0.300263	0.10559	0.200246	0.316097	-0.149978	-0.311039	-0.145745	-0.197688	0.252663	-0.193992	-0.428228	0.000612373	-0.185271	0.120656	0.0942415	0.0036748	-0.257809	-0.269574	0.270732
F2683	-0.329482	0.136062	0.15557	0.273916	-0.0814146	-0.101546	-0.593513	0.148067	-0.351405	-0.193558	0.351405	0.200648	0.412141	-0.336752	-0.21977	-0.2053	0.135898	0.262365	0.0325889	-0.090374	0.00691385	-0.146551	0.449401	0.0839411	0.433132	-0.0255618
F2684	0.0870854	0.0980443	0.121055	0.039339	0.119143	0.360163	-0.132331	0.0800362	0.199563	-0.374279	0.623635	0.439256	0.0766773	-0.127393	0.00813962	-0.0942702	0.408247	0.130351	-0.058265	-0.0553108	0.0444462	-0.146551	0.221243	0.16492	0.0909897	-0.0644157
F2685	-0.216327	-0.0370167	0.0940425	0.0983475	-0.0307787	0.125057	-0.494759	0.131559	-0.247285	-0.263674	0.58676	0.235355	0.138978	-0.211334	0.0406981	-0.219964	0.0177499	0.178608	0.0207384	-0.136302	0.108646	-0.146551	0.254825	-0.115542	0.351188	-0.104292

## Sheet: Liquid Spearman P Value
O.T.U#	M1	M2	M3	M4	M5	M6	M7	M8	M9	M10	M11	M12	M13	M15	M16	M17	M18	M19	T20	T21	T22	T23	T24	T25	T26	T27
F2660	0.408043	0.890398	0.635419	0.215463	0.149912	0.0729087	0.00192717	0.802832	0.0170235	0.200027	0.37894	0.734649	0.138989	0.732418	0.518121	0.0548911	0.395385	0.0466711	0.741566	0.0186898	0.406841	0.214923	0.399025	0.944582	0.00786532	0.572028
F2661	0.00032712	0.108262	0.406445	0.861378	0.22229	0.00619243	0.0158765	0.539008	0.375034	0.381859	0.050908	0.377553	0.270698	0.617455	0.668262	0.0083191	0.199548	0.0292973	0.848492	0.144396	0.942071	0.548993	0.423499	0.702079	0.072532	0.148604
F2662	0.78399	0.784551	0.977899	0.711121	0.0526412	0.256269	0.146278	0.149923	0.752256	0.121805	0.565815	0.0896384	0.321985	0.48534	0.709889	0.285618	0.55344	0.46637	0.600225	0.732711	0.234026	0.8816	0.0278141	0.224867	0.306895	0.226832
F2663	6.185e-05	0.261298	0.550886	0.913372	0.0854003	0.0657865	0.00142298	0.0111815	0.00667486	0.488585	0.96069	0.807961	0.465463	0.913203	0.950842	0.00098122	0.987072	0.035849	0.556075	0.231253	0.677479	0.118244	0.304287	0.108335	0.00530127	0.0403818
F2664	0.348886	0.0356722	0.985265	0.37702	0.328145	0.747448	0.657782	0.231292	0.352807	0.28899	0.933509	0.510133	0.760354	0.874427	0.953401	0.575945	0.167925	0.398631	0.0902945	0.191955	0.913478	0.783801	0.780799	0.18238	0.165333	0.420268
F2665	0.260918	0.751167	0.581627	0.505693	0.835664	0.184253	0.664817	0.735825	0.872259	0.433459	0.280354	0.577478	0.559787	0.390892	0.287693	0.174157	0.260918	0.468396	0.846952	0.233446	0.0306055	0.620682	0.168496	0.287622	0.202097	0.220962
F2666	0.483999	0.517217	0.585457	0.939538	0.165316	0.613372	0.841743	0.432698	0.067613	0.0151555	0.253912	0.0607152	0.549196	0.301465	0.562316	0.575559	0.399935	0.107915	0.96623	0.279262	0.312478	0.262935	0.328421	0.757514	0.48648	0.271368
F2667	0.0728749	0.222606	0.720981	0.832517	0.0876839	0.185672	0.316887	0.107629	0.395379	0.00156011	0.791264	0.140165	0.206613	0.173661	0.00428074	0.196205	0.580231	0.00463002	0.655627	0.309268	0.741677	0.5449	0.664463	0.828572	0.114472	0.051415
F2668	0.278465	0.854558	0.640805	0.625526	0.878872	0.534263	0.00870098	0.513042	0.213664	0.183875	0.00129522	0.237301	0.489349	0.289977	0.840268	0.270265	0.929977	0.372737	0.918224	0.497831	0.58959	0.465745	0.199578	0.566039	0.0724647	0.604674
F2670	0.162296	0.483764	0.981981	0.858978	0.536793	0.929805	0.00151633	0.867228	0.116031	0.127305	0.0119167	0.446616	0.699156	0.763225	0.909769	0.131665	0.412479	0.190213	0.610293	0.238701	0.344625	0.404853	0.049287	0.264689	0.00847153	0.531494
F2671	0.157385	0.677544	0.938519	0.437315	0.828049	0.724519	0.00603693	0.70142	0.130435	0.356774	0.00622916	0.568366	0.330983	0.101291	0.351146	0.0862918	0.621195	0.165292	0.960256	0.254056	0.739408	0.536139	0.0681297	0.936007	0.0124372	0.483918
F2672	0.00063786	0.0421929	0.8542	0.345871	0.812554	0.150818	0.0911864	0.770968	0.260008	0.228046	0.775122	0.473145	0.132133	0.471493	0.0838465	0.0475899	0.679454	0.0626362	0.198914	0.794768	0.584205	0.00430123	0.0828993	0.91815	0.0281844	0.455784
F2673	0.467574	0.164505	0.0707874	0.260798	0.878831	0.632888	0.187372	0.939685	0.0201313	0.607147	0.633999	0.107101	0.325438	0.111365	0.00397384	0.277239	0.671546	0.55476	0.607147	0.687671	0.849624	0.404853	0.856627	0.260739	0.208628	0.225767
F2674	0.384506	0.737285	0.523959	0.189774	0.223184	0.0474197	0.0426457	0.859017	0.0992667	0.72559	0.347671	0.914675	0.324106	0.176742	0.731003	0.0153204	0.443376	0.00555842	0.95867	0.176673	0.420459	0.786341	0.156376	0.187284	0.00263369	0.126341
F2675	0.217428	0.471108	0.904884	0.658072	0.208006	0.655126	0.937328	0.904884	0.241179	0.196416	0.241179	0.122402	0.702377	0.698263	0.0947453	0.750589	0.62629	0.281975	0.732261	0.80401	0.0303417	0.677225	0.711756	0.995174	0.284675	0.262957
F2676	0.568488	0.0990455	0.825485	0.325438	0.726792	0.448928	0.122952	0.267736	0.0127387	0.494759	0.213664	0.897455	0.389502	0.3234	0.136084	0.0097946	0.834623	0.414763	0.829611	0.151907	0.9649	0.393836	0.218164	0.301653	0.0549543	0.76889
F2677	0.584694	0.600621	0.702217	0.845918	0.557141	0.559831	0.67785	0.783586	0.427832	0.318116	0.225761	0.606566	0.582279	0.586835	0.362862	0.967989	0.781527	0.333892	0.954139	0.828559	0.835062	0.77076	0.974039	0.483189	0.153365	0.0745494
F2678	6.9e-06	0.0848913	0.605785	0.160169	0.0930386	0.0145575	6.278e-05	0.13418	0.0168437	0.0646905	0.231759	0.924479	0.0549543	0.871895	0.776161	5.017e-05	0.508897	0.00063028	0.736997	0.0646467	0.461651	0.0124372	0.132808	0.696694	2.032e-05	0.0384259
F2679	0.105742	0.0575872	0.330942	0.530827	0.785511	0.299017	0.414813	0.5542	0.855101	0.990355	0.496309	0.643819	0.552743	0.792464	0.588285	0.956541	0.591765	0.597695	0.983122	0.730097	0.229194	0.500905	0.0332297	0.0487609	0.34046	0.950098
F2680	0.223748	0.642028	0.970692	0.432325	0.711618	0.327037	0.380356	0.557313	0.813595	0.196699	0.601282	0.587373	0.898842	0.517974	0.835487	0.0310367	0.87587	0.396351	0.872711	0.5593	0.568582	0.228066	0.986736	0.889414	0.52581	0.720961
F2681	0.260918	0.680451	0.938215	0.505693	0.307352	0.789916	0.0486057	0.132731	0.229671	0.952252	0.0379248	0.883791	0.559787	0.565911	0.456585	0.174157	0.825418	0.405583	0.343801	0.880963	0.699112	0.620682	0.323193	0.689282	0.0880663	0.88496
F2682	0.0786434	0.826115	0.0613691	0.214879	0.0930756	0.268281	0.0870365	0.128072	0.600161	0.316603	0.108216	0.455262	0.114292	0.468229	0.322951	0.20355	0.332262	0.025851	0.997581	0.354868	0.548855	0.640096	0.985486	0.194183	0.173894	0.171982
F2683	0.0932959	0.498596	0.438427	0.166796	0.686436	0.614271	0.00110102	0.461092	0.0722767	0.333365	0.0722767	0.315612	0.0326635	0.085871	0.270698	0.304286	0.499119	0.186141	0.871805	0.65394	0.972697	0.465745	0.0186888	0.677214	0.0240206	0.89929
F2684	0.6658	0.626597	0.547525	0.845539	0.553913	0.0649805	0.510553	0.691486	0.318289	0.0544357	0.00050978	0.0218845	0.703846	0.526591	0.967859	0.639994	0.0345118	0.516955	0.772831	0.784074	0.82577	0.465745	0.267417	0.411049	0.651728	0.749569
F2685	0.278465	0.854558	0.640805	0.625526	0.878872	0.534263	0.00870098	0.513042	0.213664	0.183875	0.00129522	0.237301	0.489349	0.289977	0.840268	0.270265	0.929977	0.372737	0.918224	0.497831	0.58959	0.465745	0.199578	0.566039	0.0724647	0.604674

## Sheet: Solid Spearman rho value
O.T.U#	M1	M2	M3	M4	M5	M6	M7	M8	M9	M10	M11	M12	M13	M14	M15	M16	M17	M18	M19	T20	T21	T22	T23	T24	T25	T26	T27
F2660	0.108005	-0.0706786	-0.0185167	-0.0296221	0.152289	-0.0431162	0.251371	0.0438129	0.141553	-0.0844877	0.0110535	0.132441	-0.166045	0.0391381	-0.0134199	-0.0822921	0.240362	-0.20324	0.141223	-0.0316853	-0.138725	0.20648	-0.00824926	-0.0623049	-0.0411977	-0.388406	0.214423
F2661	0.272668	-0.0685556	-0.0512948	-0.221613	0.174641	0.200687	0.502446	0.14072	0.0755582	0.0136209	0.153087	0.342139	0.121155	-0.0230717	-0.00817254	-0.0688878	0.254019	-0.258937	-0.00751956	0.226973	0.0321462	0.266586	0.163547	-0.236121	-0.270602	-0.417286	0.0619531
F2662	0.0934437	-0.10698	-0.169755	0.0699521	0.106515	0.244055	0.192459	0.0384773	0.231614	0.209634	0.119168	-0.0161116	0.0476667	0.095617	0.0665705	-0.0359509	0.0954356	0.059179	0.0277264	-0.176394	-0.126934	0.257371	-0.120461	0.103854	-0.0926213	0.0296848	0.0520637
F2663	-0.121982	-0.111745	-0.0298684	0.051129	0.0522525	-0.192676	-0.0504287	-0.144082	-0.00926289	0.0479018	-0.0220107	0.0781146	-0.170072	-0.317797	-0.130638	0.0282999	0.0380994	-0.16471	-0.0397384	-0.235659	-0.0358618	0.115257	-0.0760328	-0.261405	0.175616	0.0412268	0.0591424
F2664	-0.309624	0.00193555	-0.0233309	0.0896204	-0.140916	-0.0118836	-0.124078	-0.0688078	-0.0541288	0.103832	-0.166604	-0.0699073	-0.0260484	-0.0234237	-0.181201	0.0518174	-0.276922	-0.106225	0.190164	0.111537	-0.125175	0.137489	-0.348599	-0.0438094	-0.0561823	0.245051	-0.17367
F2665	-0.376343	0.127734	-0.227244	0.170561	0.0123607	-0.239555	-0.479818	-0.109761	-0.146484	0.210527	-0.215806	-0.21518	-0.0547987	0.28748	0.160921	0.0321745	-0.502411	0.126906	-0.0464055	-0.0939113	-0.260512	-0.295229	-0.200285	0.0681221	-0.020782	0.329681	-0.192746
F2666	-0.0327406	-0.119836	0.0591613	0.0693235	-0.0510077	-0.0535598	0.114502	0.0168596	0.00386317	-0.0963925	0.178398	0.249211	0.0960187	0.150136	-0.18925	0.166889	0.0660801	0.0981943	-0.0144525	0.0950559	0.0722934	0.0836441	-0.0575615	-0.0370003	-0.251876	-0.284677	0.180418
F2667	-0.0135622	0.124168	0.0843686	0.310914	0.160746	0.10448	-0.00310268	-0.0684418	0.167003	0.103038	0.161848	-0.240992	0.244926	0.265279	-0.0256151	0.0967516	-0.186022	0.0618763	-0.0285333	0.30908	0.0920559	0.0162917	-0.372343	0.242414	-0.177069	0.166307	-0.106356
F2668	-0.268379	0.101926	0.102423	-0.0698817	-0.0243416	-0.222463	-0.145293	-0.223714	-0.262863	-0.208049	0.0888411	-0.170979	0.122577	-0.0610448	-0.0576777	-0.031542	-0.163854	-0.00351207	0.351281	-0.0429896	0.154394	-0.0414391	-0.238306	0.180537	-0.105351	0.0778657	-0.260968
F2669	-0.173586	0.253742	-0.239402	-0.138942	0.167327	-0.0980481	0.0125136	0.281781	0.132485	0.424884	0.266546	0.112974	0.205794	-0.0758099	0.289621	0.0613291	-0.190168	-0.01949	-0.120222	-0.111578	0.0173755	-0.103886	-0.0758099	0.0493623	0.173527	0.145895	0.0255501
F2670	-0.147103	0.208296	-0.0871036	0.0962848	0.0695361	-0.212469	-0.168782	-0.0734755	-0.0113459	0.140967	0.152143	-0.0444075	0.149447	0.367677	0.153405	0.0708312	-0.279233	0.0717323	0.181005	-0.0697842	-0.129458	0.0897658	-0.194066	0.167459	-0.0689942	0.364703	-0.226638
F2671	0.0989233	-0.00205671	-0.0525282	0.167085	-0.0913126	0.00772324	-0.102418	-0.290452	-0.102925	-0.254932	0.0300334	0.000388105	-0.00712644	-0.026842	-0.222047	-0.0627562	0.0738458	0.11938	0.0810657	-0.171937	-0.000385313	0.0589671	-0.225473	-0.0294456	-0.0877432	-0.0605116	-0.120212
F2672	0.424804	-0.0510891	0.0863602	0.199571	-0.154565	0.213188	0.0323232	0.0523536	-0.223408	-0.0225108	0.11373	0.00014578	0.0335344	-0.00889087	0.0248918	-0.316834	0.217094	0.0131669	0.0443543	0.061494	0.0724743	0.161663	0.074335	0.159155	0.0656566	0.0255035	-0.0780355
F2673	-0.248597	0.237453	-0.156188	-0.155173	0.380345	0.0576678	0.281951	0.154563	0.451195	0.274466	0.142047	0.0461733	0.234863	0.104593	0.246438	0.193872	-0.180513	-0.0636809	-0.00350619	0.152218	0.196422	0.327477	-0.200285	-0.133535	-0.197947	-0.211009	0.00952383
F2674	-0.243058	0.230333	-0.27151	0.0950978	-0.123402	-0.0956477	-0.225046	-0.195526	-0.0206619	0.166554	-0.201972	-0.0947735	-0.138254	0.0394338	-0.0568235	-0.0143398	-0.226913	-0.0361586	0.200413	-0.014873	0.0561205	-0.0999769	-0.295108	-0.108802	0.0823161	0.259097	-0.18298
F2675	0.103743	0.235534	0.0812124	-0.114009	-0.00789536	0.048882	0.155916	-0.18871	-0.102119	0.0731602	-0.0471518	0.0803978	-0.0430734	-0.0690188	0.012482	0.0611117	0.140713	-0.20419	-0.0298395	0.171202	0.0860791	0.107203	0.162419	0.00198538	-0.066811	-0.0666297	-0.0665046
F2676	0.287409	-0.247461	0.144337	-0.0777999	0.313554	0.0943781	0.195898	0.250093	0.0857005	-0.319202	0.134201	0.269939	0.0648144	-0.0986497	-0.0147071	0.307197	0.414385	0.238609	-0.156443	-0.00706194	-0.0185273	0.152959	0.345722	-0.0429129	-0.121892	-0.313742	0.333316
F2677	-0.13284	-0.0227855	0.10506	0.215132	-0.0787394	0.122147	-0.190886	-0.213179	-0.141988	0.0338004	-0.024629	-0.0379412	-0.121801	0.155793	0.101112	0.0781973	-0.184401	0.203239	0.125153	0.00505744	0.196129	-0.00288846	-0.0661526	0.122459	-0.0829843	0.0866651	-0.180196
F2678	0.678061	-0.409363	0.0784847	-0.075797	0.0774897	0.33038	0.489006	0.199079	0.110724	-0.258819	0.282837	0.560438	-0.0367482	-0.163191	-0.394024	0.136232	0.675435	-0.215416	-0.126672	0.198252	-0.171182	0.367768	0.310008	-0.0429762	-0.0390132	-0.500411	0.367856
F2679	-0.0569085	-0.151244	0.0149056	-0.186804	-0.112885	-0.0742658	-0.146392	-0.168596	-0.0151611	-0.132468	-0.133597	-0.212912	0.0551636	0.209256	-0.0901876	-0.128764	0.0276368	-0.149087	0.250988	-0.00577409	-0.0386071	0.138579	-0.0158569	0.026929	0.0308802	-0.0348995	-0.0491348
F2680	0.00673216	-0.0289704	-0.0653848	-0.134111	0.0110902	-0.0289738	0.11544	0.0234778	-0.00335294	-0.132035	0.0591234	-0.01261	-0.126373	-0.337028	-0.0358586	0.0114623	0.174374	-0.137241	-0.030587	-0.0959221	0.0451562	-0.0658195	0.0374883	-0.047216	0.113636	-0.21842	0.183576
F2681	-0.430175	0.298911	-0.105682	0.219051	-0.352127	-0.305905	-0.356469	-0.332022	-0.313453	-0.00822934	-0.00680118	-0.161336	-0.0946964	-0.187869	-0.125559	0.111715	-0.315476	0.164261	0.1509	-0.212573	-0.0259468	-0.136078	-0.187869	0.137582	-0.0773232	0.421487	-0.279512
F2682	0.218236	-0.119383	0.100802	0.182482	-0.00638604	0.228324	0.411968	-0.00582086	-0.0874538	-0.208916	0.121826	0.0144006	0.0661219	-0.129684	-0.180853	0.0508965	0.189934	0.01907	0.111536	0.140071	0.21211	0.342172	0.0368775	0.0229924	-0.214782	-0.158915	-0.0225968
F2683	-0.144067	-0.0415152	-0.097461	0.207317	-0.261836	-0.157647	-0.372918	-0.313224	-0.380063	-0.15389	-0.0153218	-0.217866	0.124341	0.0423088	-0.198094	0.25058	-0.122175	0.414749	0.216298	-0.00804775	-0.00286316	-0.0421282	-0.163191	0.193848	-0.0780264	0.147074	-0.147539
F2684	0.465455	0.121959	-0.118765	-0.00371598	0.122331	0.148534	0.388732	0.121472	0.134479	0.128944	0.303988	0.376206	0.300857	-0.0403755	-0.167413	0.0463291	0.357431	-0.0383235	-0.122131	0.381647	0.0510862	0.288171	0.0305176	0.176647	-0.0185739	-0.303104	0.165754
F2685	-0.0570478	0.0160694	-0.072221	0.0563357	-0.0974007	-0.107702	0.014876	-0.0776386	-0.0974545	-0.0430259	-0.0928578	0.102348	-0.0207388	-0.129671	-0.326547	0.0127453	0.084334	0.158596	-0.0710379	-0.163313	-0.179639	-0.000231721	-0.0136649	-0.129274	-0.200559	-0.046244	0.0862182

## Sheet: Solid Spearman P value
O.T.U#	M1	M2	M3	M4	M5	M6	M7	M8	M9	M10	M11	M12	M13	M14	M15	M16	M17	M18	M19	T20	T21	T22	T23	T24	T25	T26	T27
F2660	0.432518	0.608113	0.893259	0.830013	0.26702	0.754615	0.0641343	0.750777	0.302601	0.539688	0.936162	0.335093	0.225676	0.776642	0.922533	0.550313	0.0771201	0.13669	0.303738	0.818368	0.312458	0.130412	0.952336	0.651347	0.765215	0.00338602	0.115945
F2661	0.0440043	0.618956	0.709953	0.103935	0.202221	0.141794	9.272e-05	0.305482	0.583507	0.921377	0.264492	0.0105652	0.378251	0.867215	0.952778	0.617254	0.0612884	0.0562723	0.956548	0.0956256	0.815772	0.0491361	0.232833	0.0826468	0.0456958	0.00152679	0.65319
F2662	0.497413	0.436926	0.215333	0.611814	0.438933	0.0725505	0.159211	0.780319	0.0888564	0.124514	0.386179	0.907058	0.729656	0.487419	0.629169	0.794417	0.488249	0.667793	0.840745	0.197657	0.355751	0.0578325	0.381009	0.450515	0.501222	0.829659	0.7058
F2663	0.374979	0.416658	0.828621	0.710849	0.704782	0.158732	0.71464	0.293955	0.946487	0.728374	0.87327	0.570799	0.214464	0.018061	0.341773	0.837495	0.782423	0.229481	0.773307	0.0832662	0.794915	0.402068	0.581138	0.0538838	0.199674	0.765054	0.667987
F2664	0.0214293	0.98881	0.865737	0.515248	0.304802	0.931379	0.366765	0.617664	0.69469	0.45061	0.224096	0.612043	0.850269	0.865209	0.185521	0.70713	0.0406819	0.440184	0.164339	0.417528	0.362514	0.316832	0.00909998	0.750797	0.683706	0.0713555	0.20478
F2665	0.0046279	0.352703	0.0952194	0.213129	0.928631	0.0781483	0.00020988	0.425031	0.285896	0.122879	0.113556	0.114632	0.6911	0.0333217	0.240523	0.815612	9.284e-05	0.355858	0.736547	0.495253	0.0547386	0.0286539	0.142611	0.621181	0.880291	0.0139724	0.158578
F2666	0.812426	0.383501	0.667886	0.615025	0.711505	0.697745	0.405178	0.902763	0.977668	0.483878	0.19253	0.0665329	0.485583	0.273918	0.166414	0.223293	0.631703	0.475705	0.916593	0.489988	0.599921	0.543759	0.676365	0.788553	0.0635835	0.0351584	0.18746
F2667	0.921715	0.366418	0.540262	0.0208644	0.241041	0.447776	0.982064	0.61954	0.222973	0.454103	0.237789	0.0763251	0.0715044	0.0503008	0.852732	0.482243	0.173897	0.653592	0.836174	0.0216708	0.503849	0.906024	0.00512016	0.0745533	0.19592	0.224937	0.439618
F2668	0.0475748	0.459015	0.456816	0.612174	0.859978	0.102581	0.289872	0.100614	0.0525119	0.127452	0.518922	0.211992	0.372639	0.657957	0.675747	0.819175	0.231946	0.979698	0.00854555	0.755314	0.260386	0.763879	0.0797622	0.187165	0.443979	0.572031	0.0543003
F2669	0.205003	0.0615815	0.078345	0.311694	0.222063	0.476365	0.927751	0.0371438	0.334933	0.00122351	0.0491719	0.411518	0.131724	0.582251	0.0319725	0.656464	0.164329	0.887684	0.381959	0.417358	0.899803	0.450374	0.582251	0.720426	0.20516	0.287856	0.853102
F2670	0.28384	0.12699	0.527162	0.484369	0.613938	0.119385	0.218012	0.593954	0.934477	0.304625	0.267482	0.747506	0.276153	0.00575205	0.263487	0.607337	0.0389657	0.602762	0.186004	0.612671	0.346189	0.514564	0.155692	0.221694	0.61671	0.00618945	0.0961298
F2671	0.472419	0.98811	0.703296	0.222742	0.507314	0.955372	0.456835	0.0314617	0.454598	0.0603314	0.827689	0.997756	0.958817	0.845762	0.103243	0.648986	0.592091	0.385328	0.556291	0.209404	0.997772	0.668914	0.097897	0.831011	0.524122	0.660762	0.382001
F2672	0.0012264	0.711065	0.530707	0.144069	0.25985	0.118111	0.814775	0.704237	0.101093	0.870415	0.408374	0.999157	0.807964	0.948633	0.856846	0.0184329	0.111366	0.92399	0.747799	0.655598	0.599006	0.238333	0.589633	0.245791	0.633894	0.853367	0.571191
F2673	0.0672279	0.0808785	0.25482	0.257957	0.00417751	0.6758	0.0370247	0.259859	0.00054559	0.0425738	0.300898	0.737818	0.084344	0.447281	0.0697176	0.156113	0.187224	0.644159	0.979732	0.267246	0.150635	0.0146645	0.142611	0.331081	0.147429	0.122005	0.944982
F2674	0.0737628	0.0906853	0.0449454	0.489797	0.369404	0.487278	0.098552	0.152544	0.880979	0.224237	0.139207	0.491285	0.31412	0.774999	0.68029	0.917241	0.0957159	0.793256	0.142351	0.914175	0.684036	0.467691	0.0287221	0.42911	0.550196	0.0561157	0.181167
F2675	0.451003	0.0834354	0.555574	0.407219	0.954378	0.723036	0.255657	0.167649	0.458159	0.595543	0.732467	0.559559	0.754851	0.616584	0.927933	0.657606	0.305506	0.134828	0.828785	0.211389	0.532051	0.435963	0.236117	0.988522	0.627928	0.628864	0.629509
F2676	0.0333667	0.0685288	0.29309	0.572357	0.0197486	0.493103	0.151749	0.0655449	0.533863	0.0175298	0.328655	0.0462499	0.638262	0.47365	0.915129	0.0225263	0.00165925	0.0793677	0.254036	0.95919	0.893199	0.264896	0.00972911	0.755737	0.375334	0.0196712	0.0128927
F2677	0.333627	0.868848	0.445246	0.114716	0.567713	0.374329	0.162713	0.118125	0.301102	0.80647	0.858342	0.783304	0.375695	0.256037	0.462625	0.57039	0.177743	0.136692	0.362597	0.970768	0.151259	0.983302	0.631328	0.3731	0.546953	0.529252	0.188012
F2678	1e-08	0.00191304	0.56897	0.582315	0.573894	0.0137592	0.00015167	0.145082	0.420951	0.0563889	0.0364088	8.6e-06	0.78996	0.233865	0.00291579	0.32132	2e-08	0.114226	0.356756	0.146794	0.211443	0.00573908	0.0212596	0.755387	0.777337	0.00010003	0.00572658
F2679	0.679837	0.270354	0.913988	0.172061	0.411887	0.58998	0.286199	0.218526	0.912519	0.334997	0.330856	0.118598	0.689147	0.125209	0.512582	0.348801	0.841253	0.277325	0.0645546	0.966627	0.779596	0.312974	0.908521	0.845269	0.822907	0.800304	0.721661
F2680	0.961094	0.833699	0.635302	0.32898	0.93595	0.83368	0.401316	0.8649	0.980617	0.336593	0.668087	0.927196	0.357898	0.0118646	0.794933	0.933806	0.202922	0.317715	0.824562	0.486024	0.743394	0.633051	0.785829	0.732117	0.408762	0.109145	0.179725
F2681	0.00104548	0.0266357	0.44254	0.1081	0.0083769	0.0231294	0.00755582	0.0132685	0.0197904	0.952451	0.960695	0.239297	0.491639	0.169585	0.361032	0.41678	0.0189681	0.230772	0.271458	0.1192	0.850847	0.32187	0.169585	0.316501	0.57472	0.0013517	0.0387631
F2682	0.109451	0.385316	0.464007	0.182379	0.963093	0.0936151	0.00177738	0.966357	0.525496	0.125837	0.375596	0.916891	0.631487	0.34534	0.186381	0.712107	0.164858	0.89009	0.417532	0.307742	0.120025	0.0105572	0.789238	0.867668	0.115322	0.246514	0.869925
F2683	0.294006	0.763458	0.479022	0.128827	0.0534752	0.250354	0.00504678	0.0198852	0.00420794	0.261963	0.911596	0.110069	0.365744	0.759071	0.147123	0.0650048	0.37422	0.00164208	0.112716	0.953499	0.983448	0.760069	0.233865	0.156167	0.571236	0.283936	0.282402
F2684	0.00034254	0.375073	0.3878	0.978519	0.373607	0.27913	0.00335699	0.376994	0.327645	0.348122	0.0240491	0.00464402	0.0256178	0.769771	0.221823	0.736966	0.00738366	0.781175	0.374394	0.00403964	0.711081	0.0328808	0.824954	0.197006	0.892932	0.0244835	0.226501
F2685	0.679096	0.907301	0.600287	0.682888	0.479295	0.433817	0.914158	0.573156	0.479052	0.755113	0.500125	0.457144	0.880539	0.34539	0.014965	0.926416	0.540429	0.247477	0.606286	0.233511	0.189405	0.99866	0.921124	0.346882	0.142054	0.737431	0.531386
